# Supplementary material
Source: HighWire-hosted journal article supplement (doi:10.1101/rna.079560.122)
Supplement: Supplemental_Information_SMARTI_Rep_Fits.xlsx [file Supplemental_Information_SMARTI_Rep_Fits.xlsx]

## Sheet: RepA R Fits
	K	K_SD	Ymin	Ymin_SD	Ymax	Ymax_SD	Amp	Amp_SD	Hill	Hill_SD
WT	0.00351604	0.000287124	6.51155	0.397084	64.9522	2.19321	58.4406	2.22887	1.59046	0.142077
T1A	0.00354962	0.000303972	4.92966	0.322288	47.2644	1.87237	42.3347	1.8999	1.87318	0.202093
T1C	0.00177638	0.000180635	12.7153	0.986807	76.5457	2.49867	63.8304	2.68647	1.62275	0.226733
T1G	0.00365886	0.000420291	20.5886	0.707142	59.8617	2.27728	39.2731	2.38455	1.91757	0.339666
T2A	0.00155394	0.000165904	9.62653	0.877399	80.499	2.6914	70.8725	2.83081	1.34792	0.162707
T2C	0.00290385	0.000317964	6.68424	0.511033	64.6874	2.88169	58.0032	2.92665	1.61429	0.190569
T2G	0.00220095	0.000149191	13.8664	0.698371	74.5252	1.6968	60.6588	1.8349	1.86872	0.195739
T3A	0.00126178	0.000394215	6.74077	1.12762	63.4355	5.75947	56.6947	5.86882	0.97546	0.198894
T3C	0.00164405	0.000194359	7.9096	0.664481	61.3854	2.63351	53.4758	2.71604	1.62828	0.233446
T3G	0.000770424	0.000145598	16.4105	2.10271	86.1837	3.44111	69.7733	4.03269	1.08078	0.202806
C4A	0.000310458	0.00035607	8.24246	1.4613	50.1186	8.3742	41.8762	8.50074	0.445492	0.134945
C4G	9.82e-05	0.000248295	17.7369	3.27421	58.509	14.9314	40.772	15.2862	0.331513	0.235493
C4T	0.00115431	0.000655784	6.43817	1.11993	61.5347	7.36119	55.0965	7.44589	0.606097	0.106948
A5C	0.00242226	0.00037305	7.14945	0.629873	49.2694	3.11116	42.1199	3.17428	1.72961	0.315812
A5G	0.00144462	0.000182508	8.58128	0.769575	68.794	2.92575	60.2127	3.02527	1.39232	0.193014
A5T	0.000938641	0.00127525	4.01333	0.859331	24.8452	6.33499	20.8319	6.39301	0.554681	0.195978
G6A	1.25e-07	0.381604	56.4289	5.45429	100	60.2446	43.5711	60.491	9.15e-07	0.0538136
G6C	1.25e-07	0.618679	57.198	6.7872	98.889	26.3186	41.691	27.1796	8.22e-08	0.0983646
G6T	1.25e-07	0.333141	62.0959	4.6719	100	17.9543	37.9041	18.5522	2.76e-07	0.0518847
C7A	2.5	2851.96	79.3351	3.04924	100	659.942	20.6649	659.949	0.0541025	1.11296
C7G	1.25e-07	6.36408e+06	75.3587	3.1018	97.577	9.71082e+07	22.2183	9.71082e+07	1.69e-07	0.779699
C7T	0.00103234	0.000101067	27.8853	1.41409	88.1313	1.56496	60.246	2.1092	1.5634	0.223874
C8A	0.000150028	2.88e-05	30.0683	2.6339	92.8554	1.42774	62.7872	2.99597	0.82103	0.0996764
C8G	1.25e-07	0.34086	81.9185	3.28085	100	26.7287	18.0815	26.9293	1.11e-06	0.0699149
C8T	0.00096466	0.000123218	20.08	1.79709	88.8161	2.23885	68.7361	2.87089	1.3347	0.217558
G9A	0.00825098	0.000383025	5.6496	0.0907401	38.2906	0.962485	32.641	0.966752	2.08774	0.106432
G9C	0.00884521	0.00199943	6.0578	0.157106	13.1715	1.10565	7.11367	1.11676	2.41093	0.745052
G9T	1.36e-06	32.8118	3.05608	1.30015	6.18365	29.8277	3.12757	29.856	7.3e-07	0.374488
G10A	0.00664462	0.000415242	7.6033	0.210393	68.6784	1.93094	61.0751	1.94237	1.53896	0.0821504
G10C	0.00873366	0.000913164	8.21837	0.286112	50.4708	2.7774	42.2524	2.7921	2.04922	0.234651
G10T	0.0099639	0.00260829	4.3852	0.225959	28.8611	3.97706	24.4759	3.98348	1.6876	0.31912
A11C	0.0065548	0.00126736	11.0779	0.470751	30.075	2.26569	18.9971	2.31408	2.75682	1.0935
A11G	0.00052374	8.63e-05	14.5855	2.1263	88.1835	2.48527	73.598	3.27073	0.974159	0.136695
A11T	0.00768188	0.00292777	3.93725	0.309987	18.2096	3.32223	14.2723	3.33666	1.93431	0.767149
A12C	0.00750415	0.00253746	5.98709	0.269064	16.7185	2.1882	10.7314	2.20468	1.90248	0.714007
A12G	0.00353347	0.000615718	5.92856	0.557069	63.2619	4.13231	57.3333	4.16969	1.23112	0.164505
A12T	2.5	831.05	5.41863	0.400066	53.8133	11223.6	48.3947	11223.6	0.759709	3.15058
G13A	7.22e-05	1.76e-05	14.9649	2.38675	71.4251	2.19458	56.4602	3.24234	0.863069	0.164534
G13C	0.00305619	0.000833357	4.69925	0.537683	46.0852	4.66393	41.3859	4.69483	1.19515	0.226754
G13T	0.00166911	0.000770191	5.13504	1.03789	60.6982	7.29692	55.5631	7.37036	0.735368	0.136885
C14A	0.00410442	0.00336437	5.65083	0.422805	4.14077	0.715218	-1.51006	0.830844	3.83199	10.594
C14G	1.51e-06	30.2058	5.39025	1.12253	3.83515	19.2858	-1.5551	19.3185	1.15e-06	0.372608
C14T	0.0959481	0.763055	3.10589	0.206188	19.4694	72.9777	16.3635	72.978	0.83294	0.630019
G15A	0.00207003	0.00451251	7.46852	0.28438	7.11054	0.413238	-0.357977	0.501635	5	42.2722
G15C	0.111485	0.437386	5.37941	0.242801	100	306.414	94.6206	306.414	1.10268	0.349828
G15T	0.18576	2.28165	4.45227	0.194236	100	1213.35	95.5477	1213.35	1.22913	0.709453
G16A	2.5	1.66731e+06	2.17695	0.376843	4.9542	5850.34	2.77725	5850.34	0.00631325	12.6176
G16C	1.25e-07	1.22269	6.92823	1.51256	12.0557	4.90665	5.12751	5.1345	5.4e-08	0.181714
G16T	1.7e-07	2.75158	3.20016	0.853781	7.72387	11.3897	4.52371	11.4216	3.37e-07	0.14634
G17A	0.140986	1.86896	7.06178	0.584405	100	1037.22	92.9382	1037.22	1.08748	0.991666
G17C	0.0617312	0.350694	19.8585	1.2873	100	251.441	80.1415	251.445	0.883529	0.648455
G17T	0.34659	5.71134	6.92722	0.99764	100	692.486	93.0728	692.487	0.612482	0.509028
A18C	0.0118508	0.014766	7.32931	0.282026	13.1952	4.46527	5.86594	4.47417	1.50023	1.18167
A18G	0.00734435	0.00584105	7.47608	0.260767	9.62432	1.0598	2.14825	1.09141	2.9594	4.49359
A18T	0.00668825	0.0111932	7.10989	0.226776	8.12096	0.674125	1.01107	0.711247	5	25.7919
C19A	0.100981	1.27995	10.1107	0.322369	100	1443.63	89.8893	1443.63	1.57028	1.53955
C19G	NA	NA	NA	NA	NA	NA	NA	NA	NA	NA
C19T	0.401883	5.93991	3.93527	0.178083	100	1143.86	96.0647	1143.86	0.94228	0.450714
G20A	0.0356844	0.101563	14.5567	0.857352	67.7054	73.3729	53.1487	73.3779	0.86275	0.426725
G20C	0.355244	11.4165	11.4961	0.514016	100	2241.2	88.5039	2241.2	0.940826	1.14583
G20T	0.201996	3.38878	13.3389	0.460736	100	1213.33	86.6611	1213.33	1.0376	0.933691
A21C	0.0046565	0.00120092	7.04378	0.173422	9.92422	0.472751	2.88044	0.503556	2.75444	1.85112
A21G	0.00230401	0.000231783	11.773	0.874283	82.5646	2.66591	70.7917	2.80561	1.32338	0.149938
A21T	0.00484559	0.000761029	7.79115	0.222248	15.4114	0.742821	7.62029	0.775357	2.45711	0.834197
C22A	0.0556958	0.110014	6.60987	0.20778	54.4573	73.6979	47.8474	73.6982	1.19996	0.354323
C22G	6.26e-05	0.000316834	4.56886	0.312021	4.38827	0.187107	-0.180596	0.363822	5	101.285
C22T	0.172877	3.78563	8.47638	0.168574	100	2614.58	91.5236	2614.58	1.4902	1.33263
C23A	2.5	496906	2.66514	0.328506	4.16762	1640.84	1.50247	1640.84	0.0109688	10.9281
C23G	0.00883178	0.024026	10.1289	1.08211	7.99545	2.74491	-2.1334	2.95051	5	34.9543
C23T	0.00372931	0.00138856	4.21147	0.187368	7.14451	0.574412	2.93303	0.604199	2.03005	1.21654
C24A	2.5	483.534	6.44472	0.77284	34.2852	2512.98	27.8405	2512.98	0.55542	2.41007
C24G	0.111114	1.9916	12.807	0.591909	100	1708.57	87.193	1708.57	1.3814	1.90071
C24T	0.00742865	0.00353852	13.0533	0.691783	44.8971	7.32401	31.8438	7.35661	1.2685	0.382913
G25A	0.758662	45.756	2.93007	0.159067	100	5408.61	97.0699	5408.61	1.00666	1.00463
G25C	0.0212533	0.0171108	7.55084	0.142097	19.1505	7.42263	11.5997	7.42399	1.64307	0.613021
G25T	0.149705	2.36516	5.463	0.254213	100	1729.86	94.537	1729.86	1.3802	1.16613
T26A	0.00441293	0.00017593	9.22236	0.234768	62.9691	1.0673	53.7467	1.09282	1.83026	0.0977353
T26C	0.00191667	7.98e-05	10.8749	0.521179	81.4722	1.07439	70.5973	1.19413	1.8843	0.12503
T26G	0.00506405	0.000244115	8.9378	0.223261	55.7985	1.18102	46.8607	1.20194	1.85511	0.115494
T27A	0.00486401	0.000216745	9.02905	0.232896	61.6689	1.19428	52.6398	1.21678	1.80946	0.102729
T27C	0.00187421	0.000137705	12.0649	0.855893	79.7078	1.81266	67.6429	2.00457	1.69217	0.18262
T27G	0.00514221	0.000701268	7.25246	0.242606	17.1154	0.871151	9.86296	0.904302	2.66778	0.870497
T28A	0.00554656	0.000235852	7.9782	0.183711	60.7674	1.16549	52.7892	1.17988	1.77614	0.0871276
T28C	0.00508238	0.000236515	7.3181	0.186463	47.0512	1.01569	39.7331	1.03266	2.01855	0.131326
T28G	0.00558072	0.000881492	7.39237	0.2408	16.55	0.946456	9.15758	0.976608	2.78129	1.0937
T29A	0.00596623	0.000206223	8.23717	0.136339	56.8459	0.906653	48.6087	0.916847	1.82652	0.0737576
T29C	0.00124849	0.00018685	14.9472	1.52712	82.409	3.13521	67.4619	3.48736	1.10721	0.175948
T29G	0.00483771	0.000654463	6.58071	0.25362	20.0302	1.0798	13.4495	1.10918	2.17886	0.502271
C30A	0.00672387	0.00025208	7.44472	0.111863	48.1263	0.878744	40.6816	0.885836	1.93563	0.084316
C30G	0.00607527	0.000816289	4.02288	0.137985	18.1824	1.06951	14.1595	1.07837	1.80648	0.264288
C30T	0.00461436	0.00013826	9.18971	0.182579	64.673	0.842147	55.4833	0.861712	1.9094	0.0791278
C31A	0.00580457	0.00118798	4.20565	0.347872	31.236	3.15436	27.0304	3.17349	1.88491	0.411796
C31G	0.00564796	0.00057582	7.09509	0.341308	56.1119	2.55779	49.0168	2.58046	1.62844	0.163313
C31T	0.00502656	0.000169676	7.69314	0.16081	63.0322	0.949609	55.3391	0.963129	1.77895	0.0704942
C32A	0.0025562	0.00012525	10.0821	0.550945	79.0476	1.38363	68.9655	1.48928	1.93889	0.151765
C32G	0.00108899	0.000123758	13.1572	1.10057	80.6213	2.49823	67.464	2.72991	1.32626	0.180403
C32T	0.00270064	0.000160132	10.5642	0.64933	80.7468	1.69706	70.1826	1.81704	1.79527	0.159924
T33A	0.00281316	0.000114308	10.8243	0.434526	81.1147	1.15619	70.2905	1.23515	1.7425	0.103548
T33C	0.00321896	0.000290957	10.1731	0.584274	79.106	2.50286	68.9329	2.57015	1.2922	0.114919
T33G	0.00339153	0.00047368	9.04704	0.261356	19.7879	0.784322	10.7408	0.826721	2.07039	0.474207
C34A	0.00291823	0.000132293	10.3333	0.445233	81.5058	1.31642	71.1725	1.38967	1.65874	0.103379
C34G	0.00227297	0.000229592	11.9181	0.958423	83.527	2.64995	71.6089	2.81795	1.34861	0.16038
C34T	0.00298215	0.000134664	9.45813	0.411297	78.1689	1.31161	68.7108	1.37459	1.67813	0.10469
T35A	0.00291307	0.000193753	10.7211	0.612298	80.9574	1.89759	70.2362	1.99393	1.54425	0.130845
T35C	0.00231417	0.00016938	10.945	0.757927	81.4184	1.93008	70.4734	2.07357	1.49463	0.143001
T35G	0.00339134	0.000214851	7.79971	0.413255	64.5682	1.65925	56.7685	1.70994	1.76048	0.148925
T36A	0.00299043	0.00021163	9.48088	0.554016	76.6736	1.99714	67.1927	2.07256	1.55829	0.135185
T36C	0.00349689	0.000418943	4.37015	0.242974	23.7496	1.19642	19.3794	1.22084	1.8388	0.283903
T36G	0.0007754	7.5e-05	11.8863	1.17844	83.0491	1.75385	71.1628	2.11298	1.28341	0.147805
T37A	0.00304637	0.000198559	7.59322	0.432261	74.4681	1.86157	66.8749	1.9111	1.53855	0.116021
T37C	0.00459349	0.000295222	10.159	0.370254	73.9559	1.9015	63.7969	1.93722	1.56833	0.110187
T37G	0.0011385	7.65e-05	8.57853	0.762588	82.865	1.50875	74.2865	1.69052	1.45795	0.130782
C38A	0.00309713	0.000235654	7.56173	0.50267	71.0747	2.14048	63.513	2.19871	1.65879	0.155674
C38G	0.00293924	0.000170057	7.22154	0.390015	73.8384	1.6169	66.6169	1.66328	1.54082	0.10414
C38T	0.0032753	0.000257727	7.28683	0.450211	71.3538	2.20513	64.0669	2.25062	1.53695	0.13311
A39C	0.00262335	0.00031544	10.2782	0.79673	78.2856	3.17263	68.0074	3.27114	1.24883	0.148201
A39G	0.00307345	0.000196969	9.9546	0.478906	70.3512	1.73415	60.3966	1.79907	1.69429	0.143704
A39T	0.0042122	0.000279687	7.5921	0.34995	65.2228	1.8245	57.6307	1.85776	1.69586	0.133769
T40A	0.00317011	0.000275842	7.70416	0.560475	71.9579	2.44496	64.2538	2.50838	1.58417	0.163793
T40C	0.00262948	0.000174225	7.27687	0.458642	75.5419	1.83561	68.2651	1.89204	1.48844	0.113336
T40G	0.0036686	0.000211372	7.14576	0.364379	63.2698	1.59326	56.1241	1.63439	1.92214	0.156124
T41A	0.00312969	0.000212025	8.48628	0.474848	79.9805	1.96017	71.4942	2.01687	1.40568	0.102667
T41C	0.00343931	0.000259974	9.29303	0.477773	74.0641	2.11056	64.7711	2.16396	1.47883	0.122153
T41G	0.00476786	0.000352096	6.33883	0.306529	43.4426	1.57394	37.1038	1.60352	2.18919	0.257059
G42A	0.00352392	0.000205959	8.33293	0.386749	73.1809	1.6909	64.848	1.73456	1.61125	0.112383
G42C	0.0030427	0.000236774	8.33077	0.533159	72.3095	2.12293	63.9787	2.18886	1.56872	0.14593
G42T	0.00296393	0.000233681	8.7874	0.584638	74.5288	2.25042	65.7414	2.32512	1.63589	0.163411
C43A	0.00546268	0.000352936	6.45515	0.231358	50.7214	1.52653	44.2663	1.54396	1.85214	0.142999
C43G	0.007874	0.00115842	5.75757	0.17166	21.8933	1.48339	16.1357	1.49329	2.03906	0.347326
C43T	0.00297792	0.000237109	7.90138	0.540561	71.9962	2.22112	64.0948	2.28595	1.63776	0.161046
G44A	0.0372861	0.0437033	4.63832	0.167207	37.9308	25.3401	33.2925	25.3407	1.11267	0.248047
G44C	0.00364984	0.000227394	8.43941	0.305181	76.0628	1.70551	67.6234	1.7326	1.22774	0.0645717
G44T	0.00762414	0.000956837	5.52972	0.216627	65.1161	3.43361	59.5863	3.44044	1.18872	0.0781225
C45A	0.510741	8.25824	4.77671	0.141859	100	1242.66	95.2233	1242.66	0.927837	0.414597
C45G	0.102923	0.153993	3.53797	0.0962424	100	120.059	96.462	120.059	1.12077	0.141754
C45T	0.00474553	0.00116091	4.33174	0.487899	67.704	5.98035	63.3723	6.00022	1.01562	0.127237
G46A	9.52e-05	2.09e-05	18.1703	2.77045	80.0159	2.01194	61.8457	3.42393	0.916923	0.158906
G46C	0.00763878	0.000670211	8.73115	0.234479	60.8411	2.44837	52.1099	2.45958	1.55506	0.110648
G46T	0.00583331	0.00316666	14.3753	1.13303	48.4384	8.61134	34.0631	8.68555	1.29372	0.522609
G47A	0.01163	0.0063778	16.3222	0.905396	100	17.4933	83.6778	17.5167	0.82811	0.140591
G47C	0.0158686	0.0107143	13.7643	0.603477	64.7547	18.4733	50.9904	18.4831	1.16018	0.287658
G47T	0.0186075	0.0119866	15.3423	0.541363	80.5109	20.5105	65.1686	20.5177	0.996949	0.183706
G48A	0.0502383	0.171533	7.22847	0.46776	49.0892	85.7303	41.8607	85.7315	0.978503	0.501674
G48C	1.25e-07	1.59675	18.9701	4.20297	27.22	18.6088	8.24997	19.0775	3.23e-07	0.308703
G48T	0.0591738	0.175073	13.4515	0.705284	100	151.284	86.5485	151.286	0.940498	0.373831
G49A	0.0455812	0.0995606	6.35989	0.197095	39.1244	64.9793	32.7645	64.9796	1.43609	0.609606
G49C	0.0246871	0.0707187	4.56889	0.191007	13.1156	29.6343	8.54666	29.635	2.42244	3.99251
G49T	NA	NA	NA	NA	NA	NA	NA	NA	NA	NA
A50C	0.0107263	0.0038599	6.18752	0.142796	12.789	1.63019	6.60149	1.63643	1.91878	0.649973
A50G	0.050573	0.0792042	6.62823	0.380375	100	95.8173	93.3718	95.8181	1.04962	0.242624
A50T	0.00607117	0.00784579	7.51227	0.259585	9.01316	0.77003	1.50089	0.812607	5	29.6272
C51A	0.0666234	0.214742	7.53191	0.317426	100	303.556	92.4681	303.556	1.43454	0.599165
C51G	0.0535011	6.92682	7.60882	0.184815	100	38392.5	92.3912	38392.5	3.62003	35.1405
C51T	0.04207	0.0628719	8.768	0.489279	100	91.8795	91.232	91.8808	1.1235	0.298627
G52A	0.114388	0.696234	9.2953	0.918111	100	251.703	90.7047	251.704	0.687753	0.354386
G52C	0.141103	0.787027	6.36149	0.440911	100	322.461	93.6385	322.461	0.853524	0.352229
G52T	0.234281	6.8712	10.0072	0.430569	100	2525.93	89.9928	2525.93	1.13452	1.42913
A53C	0.0111563	0.00258472	6.75701	0.0878116	17.8129	1.47525	11.0559	1.47786	1.42151	0.193477
A53G	0.00504671	0.000407256	6.68044	0.299289	36.0796	1.44943	29.3992	1.48	2.38585	0.348174
A53T	NA	NA	NA	NA	NA	NA	NA	NA	NA	NA
C54A	0.0423644	0.189151	14.4219	0.564471	46.6913	113.99	32.2694	113.991	1.30476	1.18983
C54G	NA	NA	NA	NA	NA	NA	NA	NA	NA	NA
C54T	0.00165107	0.0023838	7.05851	0.340237	6.39543	0.46212	-0.663083	0.573861	5	21.445
C55A	0.0741147	0.206703	6.55982	0.442482	84.4287	118.066	77.8689	118.067	0.84087	0.256862
C55G	0.11711	3.43949	22.157	1.16416	100	2248.92	77.843	2248.92	1.2697	2.97979
C55T	0.00489039	0.000550557	7.76929	0.368048	70.5693	2.98747	62.8	3.01005	1.19067	0.0933556
C56A	0.0473593	0.0397171	5.94896	0.214713	100	55.446	94.051	55.4464	1.1334	0.15337
C56G	0.076214	0.273345	3.51746	0.182849	100	412.314	96.4825	412.314	1.5704	0.596388
C56T	0.0142767	0.00258079	7.38971	0.187637	67.4073	5.92588	60.0176	5.92885	1.22379	0.0878113
T57A	0.0085514	0.00158013	4.73628	0.184036	45.6122	3.47193	40.8759	3.4768	1.12099	0.0936848
T57C	0.00196682	8.96e-05	7.99021	0.389913	72.9236	1.27521	64.9333	1.33349	1.93555	0.134673
T57G	0.0990617	0.129331	4.9405	0.14724	100	74.5584	95.0595	74.5585	0.870864	0.10167
G58A	0.00177449	0.000192713	12.8189	0.989526	79.1554	2.48849	66.3365	2.67801	1.23287	0.149998
G58C	0.00348021	0.000609017	8.93171	0.73493	85.0662	4.70686	76.1345	4.76389	0.943915	0.101335
G58T	0.00646906	0.00080662	9.69794	0.358865	80.5127	3.76137	70.8148	3.77845	1.11849	0.0803911
C59A	0.00241286	0.000225741	11.9675	0.83294	82.2972	2.40299	70.3296	2.54326	1.34288	0.143903
C59G	0.00187366	0.000228756	6.44951	0.754502	61.6331	2.75639	55.1836	2.85779	1.6485	0.256108
C59T	0.00190863	0.000189154	11.1471	0.863888	84.8233	2.47904	73.6762	2.62525	1.15112	0.11754
A60C	0.00476299	0.000224095	6.76447	0.180035	68.269	1.31225	61.5045	1.32454	1.40505	0.0571516
A60G	0.0024448	0.000253247	7.77706	0.645059	67.3479	2.60147	59.5708	2.68026	1.55225	0.192389
A60T	0.0051197	0.000294699	7.13874	0.113411	25.3971	0.58547	18.2584	0.596353	1.93215	0.151267
G61A	0.00220638	0.000494123	7.32538	1.14321	76.3867	5.56657	69.0614	5.68275	1.08041	0.197321
G61C	0.00229715	0.000348183	8.17094	1.03122	79.194	3.97829	71.023	4.10977	1.22965	0.185945
G61T	0.00234245	0.000349737	9.56395	1.20357	84.0448	4.10403	74.4808	4.27687	1.27634	0.203884
A62C	0.000836657	0.000110734	10.7891	1.57639	89.4315	2.59686	78.6424	3.03788	0.994344	0.122795
A62G	0.00273807	0.000578777	14.6534	1.17269	77.1788	4.95829	62.5254	5.09508	1.07313	0.187611
A62T	0.00563771	0.000854241	8.05308	0.488667	61.8043	3.90268	53.7512	3.93316	1.45352	0.187552
G63A	0.00574899	0.000265752	7.30485	0.2023	57.0358	1.26717	49.7309	1.28322	2.01397	0.124267
G63C	0.00458623	0.000118398	7.5712	0.158503	62.6932	0.739894	55.122	0.756681	2.02152	0.0771947
G63T	0.00272182	0.000134721	8.09741	0.548353	88.1414	1.43738	80.044	1.53842	1.58865	0.107748
A64C	0.0052152	0.000256715	7.10424	0.248084	66.491	1.47138	59.3867	1.49214	1.76404	0.101713
A64G	0.00150876	0.000169468	13.2157	1.19568	88.5909	2.67733	75.3752	2.9322	1.10393	0.130917
A64T	0.00349892	0.000213867	7.86182	0.483563	81.8054	1.89349	73.9436	1.95427	1.59623	0.120558
G65A	0.000299507	3.08e-05	8.49061	1.54905	92.6189	1.10885	84.1283	1.90502	1.28501	0.117157
G65C	0.000379323	5.42e-05	5.43332	1.82648	88.4462	1.92673	83.0128	2.65487	1.32085	0.178569
G65T	0.000156044	3.21e-05	8.4299	3.54387	91.2593	1.9058	82.8294	4.02382	1.22727	0.216914
G66A	6.42e-05	1.79e-05	11.2672	4.32681	85.3401	2.67917	74.073	5.08912	0.99302	0.250734
G66C	7.21e-05	8.41e-06	15.8489	3.44427	89.9212	1.24028	74.0722	3.66078	2.49109	0.582154
G66T	2.03e-05	6.75e-06	33.9666	4.52441	88.7797	1.50691	54.8131	4.76876	0.888613	0.230352
C67A	9.5e-05	6.24e-05	14.6935	2.86455	58.7209	5.21227	44.0274	5.94756	0.613584	0.21216
C67G	0.00101885	0.000432605	5.24882	1.20314	44.1108	5.43013	38.862	5.56183	1.01213	0.305338
C67T	0.000485761	0.000132682	7.47068	1.01857	60.7019	3.44207	53.2313	3.58961	0.740241	0.0942189
T68A	9.82e-05	9.82e-05	17.1843	2.77164	70.2367	8.61966	53.0523	9.05431	0.420567	0.15438
T68C	0.000169756	9.07e-05	12.0488	2.29247	68.418	5.55413	56.3692	6.00864	0.571133	0.131665
T68G	0.000996088	0.000260899	5.45368	0.807768	29.5795	2.88999	24.1259	3.00075	2.02616	0.787577
G69A	0.000445659	0.00224509	52.4653	3.58556	100	25.4038	47.5347	25.6555	0.227316	0.152853
G69C	4.97e-05	0.000265481	46.0014	4.37014	97.8215	27.6356	51.8201	27.979	0.199742	0.188481
G69T	0.000198554	0.00347276	64.5062	3.65697	100	46.5302	35.4938	46.6737	0.154408	0.255808
A70C	7.85e-05	1.57e-05	24.4975	2.89557	90.7076	1.40663	66.2101	3.21915	0.780902	0.0998182
A70G	0.00146454	9.44e-05	13.8031	0.857428	89.9524	1.46095	76.1492	1.69398	1.38871	0.11696
A70T	0.000732278	8.94e-05	24.9743	1.86901	91.9707	1.5943	66.9965	2.45662	1.39903	0.215072
A71C	0.000885534	0.000115367	23.1072	2.05387	93.8979	1.87542	70.7907	2.7813	1.24703	0.188483
A71G	0.000565547	6.02e-05	14.7521	1.65461	94.641	1.44735	79.8889	2.19831	1.07815	0.107312
A71T	0.000618929	0.00010859	13.8019	2.46039	94.7739	2.7522	80.972	3.69162	0.915342	0.134127
A72C	0.00260044	0.000200261	13.7976	0.763163	88.5128	2.12531	74.7151	2.25817	1.26444	0.109729
A72G	0.00112104	6.96e-05	14.1254	0.888966	93.7957	1.24524	79.6703	1.53	1.15618	0.0823056
A72T	0.00166034	9.84e-05	16.4631	0.850539	88.4617	1.3213	71.9986	1.57139	1.53895	0.130369
T1A;T2A	0.00241532	0.000146319	9.53474	0.529856	60.5576	1.65477	51.0229	1.73753	2.64756	0.345453
T1A;T2C	0.00196039	0.000368903	7.89197	1.08183	67.284	4.35934	59.392	4.49157	1.34551	0.269624
T1A;T2G	0.0042184	0.00122261	7.55157	1.59436	33.267	5.53798	25.7154	5.76292	3.66484	2.93633
T1A;T3A	0.00105999	0.000145609	7.40134	0.848072	64.634	3.11963	57.2327	3.23285	1.61317	0.287499
T1A;T3C	0.000671966	0.00057774	7.22301	5.78456	79.472	16.3981	72.249	17.3884	0.836152	0.464333
T1A;T3G	0.000969881	0.00037435	9.30301	3.62301	87.3386	8.07084	78.0356	8.84674	0.912048	0.284891
T1A;C4A	0.00249772	0.00134415	6.37146	1.41994	74.0699	11.099	67.6985	11.1894	0.798045	0.186114
T1A;C4G	0.000482216	0.000272679	20.3327	3.20336	47.3945	4.31463	27.0617	5.37378	1.49475	1.13328
T1A;C4T	0.00131564	0.00117168	5.81359	2.21421	60.9082	13.5822	55.0946	13.7615	0.718976	0.270991
T1A;A5C	0.000590564	0.00151818	14.3049	6.6837	82.8945	33.2921	68.5896	33.9564	0.472653	0.337755
T1A;A5G	0.00240761	0.000814555	8.23385	1.59417	62.5134	8.67573	54.2796	8.82098	1.68145	0.675598
T1A;A5T	1.12e-05	9.94e-05	1.92287	1.85148	18.656	2.44706	16.7331	3.06856	5	409.526
T1A;G6A	8.99e-06	3.48e-05	44.9441	4.92771	100	23.6911	55.0559	24.1982	0.191041	0.1957
T1A;G6C	0.000222952	0.000105142	47.5178	5.20838	91.3294	2.57913	43.8116	5.81199	1.02086	0.355075
T1A;G6T	0.000127403	1.4e-05	24.9037	1.61212	82.2523	0.952068	57.3486	1.87226	1.23632	0.140492
T1A;C7A	8.95e-06	4.61e-06	48.5534	4.28	77.0759	1.42678	28.5225	4.51155	1.62609	1.5469
T1A;C7G	8.05e-06	6.98e-06	26.1658	6.66919	70.6517	3.12789	44.4859	7.36625	0.966636	0.834365
T1A;C7T	0.000899192	0.000225694	23.6239	3.01241	92.4939	4.44384	68.87	5.36864	0.935085	0.217573
T1A;C8A	0.000163046	7.22e-05	26.8659	6.77789	91.583	3.30066	64.717	7.53885	0.965078	0.300449
T1A;C8G	0.000174869	0.0120549	65.0339	5.0649	100	132.406	34.9661	132.503	0.111599	0.501201
T1A;C8T	0.00101682	0.000152348	21.5804	2.79421	81.6442	2.63938	60.0637	3.84369	3.13097	1.25332
T1A;G9A	0.0682494	0.602202	3.78784	1.20732	100	521.397	96.2122	521.399	0.942751	0.946872
T1A;G9C	2.93e-05	0.000282239	3.78392	3.32506	6.30746	1.43908	2.52354	3.62312	5	85.2951
T1A;G9T	0.0630032	1.91386	3.82725	0.751747	100	4794.92	96.1727	4794.92	2.10303	7.63546
T1A;G10A	0.00771794	0.00255599	7.48899	0.897691	66.0064	10.7415	58.5174	10.7789	1.59351	0.430329
T1A;G10C	0.0126893	0.00891776	7.73414	1.15098	61.0024	25.3967	53.2683	25.4228	1.74282	0.848599
T1A;G10T	0.163434	2.038	2.14479	0.730377	100	673.979	97.8552	673.979	0.759453	0.591151
T1A;A11C	2.5	228.827	6.4102	3.40684	100	2764.68	93.5898	2764.68	0.418353	1.10933
T1A;A11G	0.000920257	0.000298608	8.10985	2.8036	91.4623	7.03392	83.3524	7.57206	0.819715	0.18551
T1A;A11T	0.0170597	0.117066	2.31893	0.78474	17.0823	122.345	14.7634	122.348	5	78.1369
T1A;A12C	1.25e-07	7.51859	1.89873	2.81344	6.46181	18.5812	4.56307	18.793	1.76e-08	0.945497
T1A;A12G	0.0025346	0.000549924	5.80951	1.12559	45.279	4.76214	39.4695	4.89335	2.37111	0.898394
T1A;A12T	NA	NA	NA	NA	NA	NA	NA	NA	NA	NA
T1A;G13A	0.000349886	0.000418794	6.84062	4.1722	60.7104	13.1474	53.8698	13.7935	0.624788	0.301337
T1A;G13C	0.100567	1.11585	3.03178	1.62073	100	433.214	96.9682	433.217	0.61751	0.527404
T1A;G13T	0.0010856	8.54e-05	6.07073	0.527734	35.7049	1.47456	29.6342	1.56615	4.00729	1.15079
T1A;C14A	NA	NA	NA	NA	NA	NA	NA	NA	NA	NA
T1A;C14G	0.00526094	0.00735674	3.27938	0.57164	4.5517	1.34267	1.27231	1.45929	5	68.7091
T1A;C14T	0.00124419	0.000641683	1.6036	1.05689	6.45678	1.929	4.85319	2.19956	5	28.462
T1A;G15A	1.25e-07	3.07824	2.23214	1.82353	7.39623	1.13228	5.16408	2.14646	2.8954	1.5486e+07
T1A;G15C	NA	NA	NA	NA	NA	NA	NA	NA	NA	NA
T1A;G15T	4.69e-05	5566.29	3.43511	2.91329	3.05293	3.80078	-0.38218	4.78886	2.59e-08	1.88494
T1A;G16A	1.25e-07	1.88944	1.82927	1.124	6.96428	5.23923	5.13501	5.35844	3.4e-08	0.195465
T1A;G16C	1.25e-07	8.27946e+07	11.4583	6.53544	16.9591	3.15836e+08	5.50081	3.15836e+08	1.41e-07	8.04711
T1A;G16T	0.00313015	0.00404361	4.32081	1.20783	8.369	2.73559	4.04819	2.99037	5	24.6952
T1A;G17A	1.25e-07	3.4161	5	2.0458	6.11213	5.5243	1.11213	5.89094	5.91e-08	1.01476
T1A;G17C	0.01487	0.0315399	9.57099	1.01708	25.9103	37.2229	16.3393	37.2368	5	42.4274
T1A;G17T	0.00319783	0.00361771	4.34962	1.06439	8.13392	2.62954	3.7843	2.8368	5	19.2078
T1A;A18C	0.00700463	0.00969689	8.07202	0.868335	13.9429	3.22443	5.87086	3.33931	5	18.7668
T1A;A18G	2.5	463129	15.4947	5.33408	0	16598.9	-15.4947	16598.9	0.0115442	11.2717
T1A;A18T	6e-06	0.000120392	9.51391	4.96264	6.59643	8.02169	-2.91748	9.43268	0.370042	4.97641
T1A;C19A	0.00275234	0.0018655	12.0173	1.41322	18.5447	2.8703	6.5274	3.19935	5	19.445
T1A;C19G	2.48e-07	5.94131	8.33426	3.91913	3.94818	2236.24	-4.38608	2236.24	4.27e-05	0.474744
T1A;C19T	1.73e-05	7.01e-05	0.58576	0.735312	6.88125	0.959976	6.29549	1.20923	5	62.0676
T1A;G20A	5.72e-05	1809.72	9.48905	4.44675	16.704	7.53142	7.21495	8.74619	9.38e-09	0.218286
T1A;G20C	0.00241377	52446.1	15.0862	6.47642	2.53653	18.569	-12.5497	19.666	1.18e-07	0.268782
T1A;G20T	0.0127793	0.00840265	14.3706	0.943682	27.6377	8.68539	13.267	8.7365	2.98675	4.3509
T1A;A21C	1.11e-05	702.634	7.06522	4.03444	8.81831	12.0834	1.7531	12.7392	1.53e-07	1.3834
T1A;A21G	0.00239158	0.000278513	10.91	0.904855	73.2126	2.83232	62.3025	2.97335	1.61538	0.250519
T1A;A21T	0.00843937	0.00522942	8.34074	0.983795	20.4692	4.28084	12.1285	4.39243	5	6.17863
T1A;C22A	0.00483162	0.00192282	3.99224	0.946849	11.069	2.84756	7.07671	3.00085	5	16.6079
T1A;C22G	0.00104552	0.000917333	1.90938	1.13085	6.68263	1.96385	4.77325	2.26617	5	15.5134
T1A;C22T	0.00436054	0.00373129	4.21379	0.793893	7.38165	2.11077	3.16786	2.25513	5	19.3941
T1A;C23A	NA	NA	NA	NA	NA	NA	NA	NA	NA	NA
T1A;C23G	2.66e-05	0.000230309	5.79411	9.09776	8.26227	2.38099	2.46815	9.40417	2.2102	21.9864
T1A;C23T	2.05e-05	0.00013179	2.94919	1.02908	4.25378	0.484376	1.30459	1.13738	5	62.4823
T1A;C24A	0.0127354	0.00880524	6.93932	0.889923	18.8724	8.69006	11.9331	8.73551	3.08696	5.45594
T1A;C24G	0.000784318	0.00116388	9.53109	1.64277	14.2299	2.0591	4.69876	2.63412	5	15.7615
T1A;C24T	1.25e-07	5.91003	4.94505	6.22675	14.9541	18.6573	10.0091	19.669	1.58e-08	0.355183
T1A;G25A	NA	NA	NA	NA	NA	NA	NA	NA	NA	NA
T1A;G25C	0.00132799	0.00101929	12.4117	1.57403	8.05887	1.87434	-4.35278	2.44759	5	24.7792
T1A;G25T	1.25e-07	4.09039	4.29687	3.03425	8.78296	39.4172	4.48609	39.5338	4.97e-07	0.497975
T1A;T26A	0.00390918	0.000361778	12.2807	0.928774	68.8011	2.509	56.5204	2.67539	2.21759	0.372213
T1A;T26C	0.0016539	0.000228295	14.4286	2.02245	81.9015	3.08895	67.473	3.69214	1.8632	0.426531
T1A;T26G	0.00544187	0.00254605	10.0629	2.42061	70.933	14.4289	60.8701	14.6306	1.61541	0.817357
T1A;T27A	0.00428245	0.000731082	9.85294	1.70579	65.9391	5.41803	56.0861	5.68021	2.83548	1.12829
T1A;T27C	0.00192273	0.000317354	14.9348	2.21481	77.6964	3.8014	62.7616	4.39955	1.85469	0.509878
T1A;T27G	0.00589464	0.00336764	8.63349	1.47349	30.0824	5.86592	21.4489	6.04816	5	14.8314
T1A;T28A	0.00416199	0.00126346	7.11069	1.46358	59.8255	7.42001	52.7148	7.56298	1.63504	0.587597
T1A;T28C	0.00766282	0.00601033	9.99142	1.29655	55.5365	16.5209	45.545	16.5717	1.19788	0.528555
T1A;T28G	2.73e-07	7.43278	7.89465	4.97099	22.5837	582.578	14.6891	582.599	2.96e-06	0.27012
T1A;T29A	0.00592068	0.00240867	9.15214	1.76783	64.3016	11.318	55.1495	11.4552	1.60112	0.660742
T1A;T29C	0.00107675	0.000349022	17.4651	3.20916	74.4974	5.443	57.0324	6.31862	1.22542	0.458541
T1A;T29G	0.00225226	183059	6.91489	8.17236	13.6333	36.5821	6.71843	37.4839	1.11e-07	0.85868
T1A;C30A	0.010467	0.016321	3.29732	1.78448	69.023	51.3341	65.7257	51.3651	1.20959	0.859875
T1A;C30G	0.00181438	0.00070133	2.8555	0.809926	14.0785	2.59224	11.223	2.71582	3.63724	3.49903
T1A;C30T	0.00476909	0.00124176	9.3791	1.50285	69.194	7.46127	59.8149	7.61112	1.73016	0.549861
T1A;C31A	0.0489826	0.176926	4.05806	0.756765	100	236.724	95.9419	236.726	1.0853	0.562815
T1A;C31G	1.25e-07	9.56661	8.46153	12.2704	13.2375	42.3369	4.77597	44.0792	2.44e-07	1.56682
T1A;C31T	0.00392174	0.0013306	4.91635	1.42976	59.7593	8.56578	54.8429	8.68428	1.59813	0.57398
T1A;C32A	0.00211764	0.000157983	12.1426	1.26492	77.5142	2.01455	65.3716	2.37875	2.7534	0.489835
T1A;C32G	0.00324176	0.00217871	5.82771	1.89044	89.6625	18.2921	83.8348	18.3895	0.84588	0.264674
T1A;C32T	0.00197155	0.000420955	12.6155	2.8788	82.0549	5.00891	69.4394	5.77725	1.79536	0.562949
T1A;T33A	0.00235741	0.000229832	11.7963	1.11123	87.8345	2.50963	76.0382	2.74464	1.48595	0.188314
T1A;T33C	0.00304494	0.000824585	10.674	1.19424	82.458	6.64346	71.784	6.74994	0.90644	0.154329
T1A;T33G	0.0044474	0.00136161	12.6666	1.4299	27.2125	3.48192	14.5459	3.76409	5	8.08244
T1A;C34A	0.00264883	0.000319645	14.5465	1.72062	87.4673	3.26101	72.9208	3.68711	1.87775	0.380136
T1A;C34G	0.00295122	0.000555837	10.2025	1.07521	60.7225	4.2005	50.5201	4.33593	1.52884	0.342554
T1A;C34T	0.00213741	0.000242071	12.7616	1.77039	79.3937	2.59948	66.6321	3.14509	2.49504	0.555334
T1A;T35A	0.0030899	0.000434355	13.4161	1.95913	79.971	4.11576	66.5549	4.55825	2.21438	0.607458
T1A;T35C	0.00205614	0.000252057	13.8204	2.06633	85.5466	2.97449	71.7262	3.62178	1.99165	0.453658
T1A;T35G	0.00226698	0.000485621	10.6658	1.43482	57.9767	4.06158	47.3109	4.30757	1.60278	0.451627
T1A;T36A	0.00275053	0.000934946	7.68504	2.1035	68.2935	8.9791	60.6084	9.2222	1.49006	0.594543
T1A;T36C	0.000137612	6415.15	1.74419	2.25433	11.0798	15.9003	9.33561	16.0593	7.54e-08	0.308129
T1A;T36G	0.000715401	0.000119228	12.2916	1.89289	72.2387	2.81893	59.9472	3.39549	1.84373	0.511797
T1A;T37A	0.00289128	0.000552919	8.43332	1.93418	65.8081	5.87206	57.3748	6.18241	2.59127	1.04654
T1A;T37C	0.00362902	0.000380961	15.0377	1.1412	76.9599	2.98813	61.9223	3.19864	2.04067	0.362927
T1A;T37G	0.000996417	0.000185528	6.3969	1.83435	74.9033	3.87674	68.5064	4.28882	1.55801	0.395579
T1A;C38A	0.00247832	0.000558756	4.6177	1.28481	51.4428	5.49699	46.8251	5.64514	2.21595	0.853531
T1A;C38G	0.00393518	0.000381654	7.76682	1.08092	62.3383	3.54409	54.5715	3.70527	4.16374	1.14565
T1A;C38T	0.00344298	0.000449221	8.20015	0.995439	56.1716	3.52055	47.9714	3.65857	3.21096	0.966279
T1A;A39C	0.00262286	0.000531543	9.61723	1.5514	77.9424	5.62847	68.3251	5.83836	1.47992	0.347852
T1A;A39G	0.00343226	0.000994457	10.1917	2.2037	71.56	8.15798	61.3683	8.45039	1.79886	0.729818
T1A;A39T	0.00787369	0.00439952	9.67882	1.7772	71.7233	18.2995	62.0444	18.3856	1.5	0.653576
T1A;T40A	0.00259275	0.00082371	7.63213	1.72472	61.2056	7.2447	53.5734	7.44717	1.51401	0.540378
T1A;T40C	0.00283564	0.000372916	6.71699	1.21808	76.7423	4.36646	70.0253	4.53318	2.13936	0.487283
T1A;T40G	0.00377887	0.000728205	8.17912	1.07169	57.2793	4.36344	49.1002	4.49312	1.80719	0.437722
T1A;T41A	0.00319468	0.00109207	5.94825	1.62063	62.6911	7.73342	56.7428	7.90141	1.34505	0.421984
T1A;T41C	0.00295521	0.00194259	3.42579	1.89012	65.7606	15.7244	62.3348	15.8376	1.08877	0.494061
T1A;T41G	0.00427917	0.000854826	5.93852	1.09192	40.8959	4.63292	34.9573	4.75985	3.06584	1.36643
T1A;G42A	0.002967	0.000465025	7.9728	1.01602	58.1908	3.68791	50.218	3.82531	2.15385	0.523294
T1A;G42C	0.00501346	0.00192886	6.40792	1.34224	80.0046	11.6284	73.5967	11.7057	1.19024	0.318831
T1A;G42T	0.00284791	0.000580872	6.76041	1.13767	64.4085	5.13689	57.6481	5.26136	1.59097	0.398925
T1A;C43A	0.00605653	0.00505156	6.25075	1.45095	50.9019	16.9058	44.6511	16.9679	1.24937	0.696243
T1A;C43G	0.00410977	0.00252451	7.26059	1.72366	18.3659	4.70554	11.1053	5.0113	5	10.4458
T1A;C43T	0.00258414	0.000756622	6.61932	1.58441	62.2422	7.16256	55.6229	7.3357	1.68698	0.619336
T1A;G44A	1.34362	145.822	3.24688	1.49657	100	5383.17	96.7531	5383.17	0.614903	1.71399
T1A;G44C	0.0111728	0.01673	1.94893	1.17627	100	46.659	98.0511	46.6738	0.669054	0.202346
T1A;G44T	0.0466536	0.187138	2.93257	1.02815	100	162.369	97.0674	162.372	0.703864	0.333646
T1A;C45A	0.0147793	0.0316682	5.46658	1.11002	18.6935	30.8613	13.2269	30.8813	5	44.1232
T1A;C45G	5.17e-05	2.26e-05	1.49667	0.831037	7.24871	1.09591	5.75204	1.37537	5	48.2183
T1A;C45T	0.00623451	0.00390238	3.65769	1.16171	40.1082	12.0214	36.4505	12.0774	1.68741	0.962462
T1A;G46A	0.000250209	4.43e-05	12.2167	1.53296	71.161	2.04684	58.9444	2.55724	0.876659	0.107471
T1A;G46C	0.00523513	0.000552167	8.66627	1.01409	46.1857	3.41428	37.5194	3.56169	5	4.48374
T1A;G46T	4.6e-07	9.00651	32.3523	20.0482	66.7839	1499.86	34.4316	1500	4.39e-06	0.338314
T1A;G47A	0.00812471	0.00190543	20.9125	1.69798	69.8107	6.86479	48.8982	7.07167	2.71882	1.10512
T1A;G47C	2.5	177.722	12.665	5.55343	100	1108.47	87.335	1108.48	0.263529	0.590355
T1A;G47T	0.00908425	0.00331069	20.4417	1.89489	54.31	8.58866	33.8683	8.7952	3.18581	2.24608
T1A;G48A	2.5	159.948	8.90752	1.70581	37.4325	323.452	28.525	323.456	0.260801	0.517255
T1A;G48C	NA	NA	NA	NA	NA	NA	NA	NA	NA	NA
T1A;G48T	0.00891664	0.00768731	11.8906	1.22836	49.4558	16.7445	37.5652	16.7895	1.33337	0.700564
T1A;G49A	1.25e-07	0.000377787	9.68403	4.18422	6.0335	1.49352	-3.65053	4.44278	1.17131	771.122
T1A;G49C	0.00204086	57649.3	4.0146	1.53162	7.57974	2.17139	3.56514	2.65722	1.73e-08	0.380936
T1A;G49T	0.00192184	0.00325464	4.94162	1.07935	2.91612	1.3199	-2.0255	1.70503	5	29.72
T1A;A50C	0.00503423	0.00354686	8.16156	0.916655	11.4209	2.20904	3.25934	2.39168	5	40.4934
T1A;A50G	7.03e-07	33.1101	4.86111	4.03234	3.53327	12.2602	-1.32784	12.9063	8.49e-08	2.94083
T1A;A50T	NA	NA	NA	NA	NA	NA	NA	NA	NA	NA
T1A;C51A	4.5e-06	207.177	6.31068	2.42094	8.90113	4.22969	2.59045	4.87352	1.54e-08	0.378845
T1A;C51G	NA	NA	NA	NA	NA	NA	NA	NA	NA	NA
T1A;C51T	0.980591	52.3379	6.12948	1.389	100	2327.52	93.8705	2327.52	0.580468	0.991094
T1A;G52A	2.5	696.635	4.64795	2.28895	26.4413	417.172	21.7934	417.178	0.120759	0.87954
T1A;G52C	0.000470966	22189.9	5.07246	3.0963	6.43733	4.28622	1.36486	5.28761	6.16e-08	1.48121
T1A;G52T	0.0745241	3.25944	6.39885	1.57473	100	5780.53	93.6011	5780.53	1.80023	7.97654
T1A;A53C	0.0479714	7512.03	9.48864	1.67945	0	6.92069e+06	-9.48864	6.92069e+06	5	39238.2
T1A;A53G	0.00617789	0.00398833	7.44791	1.66157	38.1139	8.48759	30.666	8.6487	5	13.708
T1A;A53T	NA	NA	NA	NA	NA	NA	NA	NA	NA	NA
T1A;C54A	NA	NA	NA	NA	NA	NA	NA	NA	NA	NA
T1A;C54G	NA	NA	NA	NA	NA	NA	NA	NA	NA	NA
T1A;C54T	0.00240515	0.00227651	7.22787	1.2968	10.4187	2.27927	3.19082	2.62236	5	31.0877
T1A;C55A	0.0615804	0.711577	4.92387	1.31716	100	1106.89	95.0761	1106.89	1.44791	2.37392
T1A;C55G	0.0162771	628011	28.3784	13.5086	23.9078	19.1491	-4.47058	23.4344	7.08e-08	1.67078
T1A;C55T	0.00602904	0.00347516	6.36341	1.29827	49.8435	12.1945	43.4801	12.2635	1.36044	0.59991
T1A;C56A	1.25e-07	13.2046	6.13207	4.98063	8.48896	51.3167	2.35689	51.5579	3.26e-07	1.72994
T1A;C56G	NA	NA	NA	NA	NA	NA	NA	NA	NA	NA
T1A;C56T	0.0499311	0.315748	6.25467	1.87019	100	299.292	93.7453	299.297	0.838379	0.728877
T1A;T57A	NA	NA	NA	NA	NA	NA	NA	NA	NA	NA
T1A;T57C	0.00216978	0.000346671	9.0247	1.32658	59.0555	4.49479	50.0308	4.68647	2.86723	1.00694
T1A;T57G	0.00164477	0.000794897	2.88488	0.763143	10.3247	1.99992	7.43985	2.14058	5	7.64619
T1A;G58A	0.00612533	0.00626176	8.92301	2.59302	100	29.0763	91.077	29.1917	0.711242	0.252648
T1A;G58C	0.00577834	0.000910067	12.5075	0.777092	83.9772	5.05964	71.4698	5.11897	1.33677	0.176429
T1A;G58T	0.00885842	0.00339931	13.9869	1.04669	100	13.9313	86.0131	13.9705	1.01689	0.183223
T1A;C59A	0.00133649	0.000176044	21.9687	2.16062	84.1269	2.2042	62.1582	3.08655	1.85781	0.414129
T1A;C59G	0.00148704	0.000433487	9.38421	1.85603	50.8947	4.70133	41.5105	5.05444	1.77614	0.779079
T1A;C59T	0.00210794	0.000397812	12.6241	1.56135	79.6439	4.39489	67.0198	4.66399	1.26007	0.250829
T1A;A60C	0.00396087	0.00105743	7.63731	1.51765	58.4936	7.06602	50.8563	7.22716	1.94053	0.796937
T1A;A60G	0.0183583	0.094617	2.0916	2.01537	90.6655	109.597	88.5739	109.616	0.455979	0.255806
T1A;A60T	0.0529817	0.225292	6.95723	0.957759	63.8222	77.225	56.865	77.2309	0.548368	0.250803
T1A;G61A	0.00279747	0.000940366	6.96941	1.51002	57.6145	7.74026	50.6451	7.88618	1.56157	0.587613
T1A;G61C	0.00251725	0.00110728	8.88789	2.46824	73.6772	10.8	64.7893	11.0784	1.15922	0.472529
T1A;G61T	0.00484705	0.00248398	5.81241	1.66588	100	16.9435	94.1876	17.0252	0.901902	0.225448
T1A;A62C	0.00148884	0.000219857	19.588	2.83559	89.2494	2.94506	69.6614	4.08827	1.89398	0.486029
T1A;A62G	0.0135732	0.0290995	13.2188	2.56835	100	66.4509	86.7812	66.5005	0.742988	0.392585
T1A;A62T	0.0064376	0.00239506	11.3243	1.03785	67.1444	9.36224	55.8201	9.41959	1.22587	0.302937
T1A;G63A	0.00500697	0.000456603	10.8939	0.93279	56.3545	2.88352	45.4606	3.03064	3.72742	1.41173
T1A;G63C	0.00522827	0.000519295	8.5154	1.05502	65.1349	3.41637	56.6195	3.57556	3.30369	1.01813
T1A;G63T	0.0022979	0.000185078	9.7172	1.31836	89.0983	1.93386	79.3811	2.34049	2.02228	0.289899
T1A;A64C	0.00420879	0.00139899	9.05904	2.11337	61.8367	8.48942	52.7776	8.74852	1.98493	0.977879
T1A;A64G	0.00220541	0.000263788	16.464	1.69992	82.3914	2.91902	65.9274	3.37793	1.96413	0.391273
T1A;A64T	0.00348758	0.000298994	11.9195	1.31831	78.5692	2.61094	66.6497	2.92489	2.78111	0.555053
T1A;G65A	0.000216484	3.61e-05	10.8792	2.98174	95.03	1.25034	84.1507	3.23328	1.3297	0.186248
T1A;G65C	0.00053695	5.42e-05	9.61116	1.20854	85.5924	1.7872	75.9812	2.15747	1.51692	0.193495
T1A;G65T	0.000117572	2.17e-05	11.9526	3.43297	95.7189	1.25436	83.7663	3.65496	1.10494	0.153255
T1A;G66A	5.1e-05	8.38e-06	13.1326	4.1374	85.354	2.14386	72.2214	4.65985	2.31163	0.904537
T1A;G66C	6.13e-05	6.02e-06	25.6309	3.62182	93.0852	0.855111	67.4543	3.7214	3.27419	0.749005
T1A;G66T	1.63e-05	1.31e-05	22.8634	8.03545	94.2418	6.06892	71.3784	10.0698	0.512912	0.279006
T1A;C67A	2.91e-05	2.3e-05	19.0708	7.36492	55.8589	4.97349	36.7881	8.88694	1.30471	1.11795
T1A;C67G	0.000707297	0.000228749	3.66	1.02444	37.8956	4.71339	34.2356	4.82343	4.40209	3.71782
T1A;C67T	0.000276505	0.000222873	4.10427	2.30773	59.4877	10.1086	55.3834	10.3687	0.723061	0.261501
T1A;T68A	1.25e-07	4.5691	10.5303	8.41519	100	386.182	89.4697	386.273	2.38e-07	0.106224
T1A;T68C	0.000427786	0.000630863	9.91067	4.94016	75.1449	18.9907	65.2342	19.6227	0.567857	0.307251
T1A;T68G	0.0579073	0.557929	2.45546	1.86338	86.231	205.383	83.7755	205.391	0.423979	0.290156
T1A;G69A	1.08e-05	8.66e-06	48.887	4.92398	88.4562	3.27415	39.5692	5.91317	0.505088	0.262773
T1A;G69C	1.43e-05	1.2e-05	39.3186	8.57138	89.1178	3.33696	49.7992	9.19803	0.781384	0.503814
T1A;G69T	1.72e-05	2.54e-05	52.7321	4.8344	100	9.57845	47.2679	10.7293	0.268123	0.158955
T1A;A70C	0.000258029	7.33e-05	32.5807	4.62248	91.6548	1.94915	59.0741	5.01662	1.43141	0.402343
T1A;A70G	0.00101746	0.000238527	9.27896	2.49147	85.3753	4.75538	76.0963	5.36852	1.29552	0.332537
T1A;A70T	0.000972286	8.44e-05	26.2388	1.64172	92.5109	1.06066	66.2721	1.95455	2.18881	0.339795
T1A;A71C	0.000908636	0.000163885	20.6316	2.91315	89.5541	2.65582	68.9225	3.94206	1.60484	0.417148
T1A;A71G	0.000594189	0.000100563	10.8505	2.60829	96.2299	2.20519	85.3795	3.41556	1.08079	0.169755
T1A;A71T	0.00116802	0.000145808	16.2264	2.06328	91.1277	1.95902	74.9013	2.84515	1.57004	0.266083
T1A;A72C	0.0025453	0.000492224	11.3946	1.99829	78.5913	5.01595	67.1967	5.39935	1.56344	0.418138
T1A;A72G	0.00173172	0.000194674	9.99932	1.54539	94.0727	2.69567	84.0734	3.10723	1.3339	0.191776
T1A;A72T	0.00325401	0.000526311	13.1753	1.81591	58.4634	4.41962	45.2881	4.77813	4.04045	1.81671
T1C;T2A	0.00103106	0.000308689	14.9918	3.05318	85.2268	6.09829	70.235	6.8199	1.08458	0.330932
T1C;T2C	0.000764495	0.000796399	15.8471	5.45588	95.2202	16.3732	79.3731	17.2583	0.492452	0.178669
T1C;T2G	0.00118372	0.000189334	28.6066	2.46475	86.8541	2.87642	58.2476	3.78798	1.81952	0.489073
T1C;T3A	0.000770709	0.00177082	18.1389	6.07585	100	29.8107	81.8611	30.4236	0.370891	0.190698
T1C;T3C	0.000745446	0.000258846	27.0051	3.67682	82.1236	5.09921	55.1184	6.28657	1.01614	0.35113
T1C;T3G	0.000461597	0.00043789	26.1381	7.43964	97.3021	13.2142	71.164	15.1645	0.54038	0.237516
T1C;C4A	0.0653217	14.1237	16.3638	6.28436	100	916.649	83.6362	916.671	0.0984389	0.693896
T1C;C4G	1.25e-07	3.18912	27.6596	14.1353	90.7259	45.5634	63.0664	47.7057	2.29e-08	0.124293
T1C;C4T	5.42e-05	3.86e-05	16.415	4.15397	66.7643	6.44274	50.3494	7.66579	0.600193	0.285935
T1C;A5C	0.00195004	0.0350652	7.58619	6.44538	100	169.483	92.4138	169.605	0.212431	0.335796
T1C;A5G	9.31e-05	0.000134307	26.7714	7.79419	97.0945	15.2962	70.3231	17.1675	0.391747	0.220863
T1C;A5T	1.25e-07	5.99002	6.25	4.73922	25.7614	40.9966	19.5114	41.2697	3.58e-08	0.362698
T1C;G6A	0.000423817	0.00656294	66.8395	4.6786	100	46.22	33.1605	46.4562	0.188625	0.31468
T1C;G6C	0.00254899	0.0263519	67.958	5.40799	100	45.4278	32.042	45.7486	0.286366	0.374812
T1C;G6T	9.73e-06	6.51e-06	51.6262	4.60239	88.0676	1.68409	36.4414	4.90083	0.779307	0.391163
T1C;C7A	0.00384949	11829.9	79.4872	3.07407	96.516	3.76916	17.0288	4.86379	2.22e-08	0.0715692
T1C;C7G	2.5	24830.7	77.8323	3.66677	100	2757.83	22.1677	2757.83	0.0248367	2.51419
T1C;C7T	8.15e-05	7.54e-05	42.4697	7.5731	95.3827	6.94725	52.9131	10.277	0.495824	0.227457
T1C;C8A	8.67e-05	4.82e-05	36.1843	6.34474	88.7097	3.47386	52.5255	7.23349	0.696363	0.225698
T1C;C8G	NA	NA	NA	NA	NA	NA	NA	NA	NA	NA
T1C;C8T	0.000729649	0.000183186	34.5291	3.4355	88.8338	3.10496	54.3046	4.63071	1.57649	0.575098
T1C;G9A	0.0135217	0.012706	6.9333	1.18226	98.3817	38.7908	91.4484	38.8088	0.979873	0.293094
T1C;G9C	0.0100021	0.0027958	7.56175	0.843384	28.5538	4.22584	20.9921	4.30918	5	4.57523
T1C;G9T	0.00512587	0.00111362	8.50787	1.16601	41.7918	5.37717	33.284	5.50214	3.22635	2.1723
T1C;G10A	0.00304225	0.00119832	12.0378	2.04025	86.9157	10.468	74.8778	10.665	0.941964	0.257277
T1C;G10C	0.0197764	0.0532414	8.9976	2.24751	100	105.109	91.0024	105.133	0.847865	0.524297
T1C;G10T	0.0246894	0.112276	4.34932	2.12969	100	179.554	95.6507	179.566	0.782312	0.630464
T1C;A11C	0.00389939	0.00184916	10.1766	2.26051	29.2186	6.46247	19.0419	6.84641	5	7.09222
T1C;A11G	0.000238008	0.000126234	29.9669	6.92976	90.4397	4.67419	60.4728	8.3588	0.947378	0.357945
T1C;A11T	0.0142149	0.0402667	6.53096	2.43973	70.8187	83.5318	64.2877	83.5674	0.960181	0.771411
T1C;A12C	0.0268837	0.0883921	8.11659	2.17664	100	276.501	91.8834	276.509	1.72341	2.07711
T1C;A12G	0.00155324	0.000227101	17.204	2.02893	85.6307	3.57235	68.4267	4.10831	1.80016	0.420637
T1C;A12T	3.23e-05	7.77e-05	4.09859	1.85486	12.4823	1.32285	8.38368	2.27826	5	26.6174
T1C;G13A	4.19e-05	4.41e-05	60.0457	2.72285	83.2353	1.1343	23.1896	2.94967	5	29.6011
T1C;G13C	0.0011825	0.000808414	9.65142	3.48074	89.6806	13.9045	80.0292	14.3336	0.665554	0.199366
T1C;G13T	0.000211069	9.34e-05	18.1444	3.11072	76.1646	4.83254	58.0202	5.74718	0.64027	0.145125
T1C;C14A	NA	NA	NA	NA	NA	NA	NA	NA	NA	NA
T1C;C14G	2.77e-05	0.000150763	17.7131	5.85261	21.3571	2.32552	3.64398	6.2977	3.55676	28.9105
T1C;C14T	0.073718	1.54881	11.1055	1.6148	100	1951.52	88.8945	1951.52	1.43395	3.50225
T1C;G15A	1.25e-07	2.5901	8.24742	2.34463	10.3032	1.00043	2.05582	2.54915	3.02836	1.37209e+07
T1C;G15C	NA	NA	NA	NA	NA	NA	NA	NA	NA	NA
T1C;G15T	0.0394871	0.234262	14.7763	2.00763	100	388.278	85.2237	388.283	1.29029	1.64173
T1C;G16A	2.5	2136.52	4.15937	3.11016	22.2926	795.213	18.1332	795.22	0.0939419	1.91867
T1C;G16C	0.0159837	0.130418	12.429	2.25706	31.4106	62.7923	18.9815	62.8329	0.817323	1.69822
T1C;G16T	1.25e-07	2.80499	10.7843	4.0279	23.8195	17.9498	13.0352	18.3962	9.24e-08	0.216284
T1C;G17A	0.250105	6.99137	15.8168	2.45591	100	992.397	84.1832	992.401	0.599761	1.01362
T1C;G17C	0.00352083	0.0018773	20.31	1.31704	65.5638	8.38479	45.2538	8.4876	0.811028	0.220229
T1C;G17T	0.962156	37.3287	9.15428	3.40468	100	642.803	90.8457	642.812	0.275937	0.379926
T1C;A18C	2.5	237.968	2.50872	2.31783	92.2632	2853.56	89.7545	2853.56	0.425772	1.06815
T1C;A18G	0.00118275	53617.3	7.14286	4.17352	19.227	6.6658	12.0842	7.86455	4.82e-09	0.16047
T1C;A18T	0.00997797	0.00573687	7.42202	1.06005	18.4359	5.28254	11.0138	5.38785	3.72374	4.84027
T1C;C19A	1.14e-05	1285720027	20.6896	8.44536	26.956	2.69692e+08	6.26637	2.69692e+08	7.61e-07	32.4366
T1C;C19G	0.00388777	0.00131465	9.33085	0.921867	19.4794	2.53637	10.1486	2.6987	4.15031	3.85814
T1C;C19T	0.0012299	0.000429404	12.6691	1.42696	21.4819	2.25758	8.81278	2.67075	5	20.8785
T1C;G20A	1.76e-06	21.4374	43.1818	10.1657	51.9575	17.132	8.77566	19.921	8.3e-08	0.468982
T1C;G20C	0.00250315	0.00118381	7.00451	1.03448	25.2832	3.81158	18.2787	3.94947	1.59371	0.87164
T1C;G20T	2.5	1287.12	25.838	4.87657	57.1642	816.153	31.3261	816.167	0.0928896	1.14457
T1C;A21C	0.00115988	0.000570235	5.14879	1.85858	16.4848	3.21386	11.336	3.71257	5	19.2604
T1C;A21G	0.00110149	0.000252111	20.7539	3.20535	88.8585	4.37689	68.1046	5.42507	1.37514	0.415492
T1C;A21T	1.81531	70.9285	9.11988	2.96715	100	749.973	90.8801	749.979	0.304404	0.39616
T1C;C22A	0.0081273	0.00930917	12.7418	1.52609	39.3685	16.0884	26.6268	16.1606	1.4293	1.1986
T1C;C22G	0.0303492	92.8414	8.27977	1.91725	0	85445.1	-8.27977	85445.1	5	5478.34
T1C;C22T	2.5	196.976	4.87067	2.38023	100	2253.19	95.1293	2253.19	0.392946	0.843721
T1C;C23A	1.89e-06	65.998	8.73772	5.13228	24.0835	3824.82	15.3458	3824.82	1.43e-05	0.280948
T1C;C23G	NA	NA	NA	NA	NA	NA	NA	NA	NA	NA
T1C;C23T	0.0041252	0.00144918	9.39306	1.08847	20.4759	2.80678	11.0828	3.01045	5	5.80454
T1C;C24A	0.0402967	0.92845	23.0705	1.44438	100	3120.32	76.9295	3120.32	2.56654	14.1474
T1C;C24G	1.25e-07	1.77e-05	22.4385	8.82217	37.1571	7.13599	14.7186	11.3469	0.593451	18.398
T1C;C24T	0.00293449	0.00213366	26.4507	3.14956	59.5427	10.0053	33.092	10.4893	1.33684	1.07915
T1C;G25A	1.25e-07	5.53e-06	5.6712	2.13698	12.3146	4.89029	6.64341	5.33681	0.35155	3.83891
T1C;G25C	0.00874137	0.0125627	12.3785	2.05886	21.0593	6.719	8.68079	7.02737	5	15.1425
T1C;G25T	1.07032	60.6629	5.02728	4.1896	100	1050.62	94.9727	1050.62	0.290239	0.571385
T1C;T26A	0.00234433	0.000222643	14.7658	1.24158	85.4548	2.3431	70.689	2.65173	1.54495	0.206731
T1C;T26C	0.000997566	0.000208966	19.677	3.79578	92.7013	3.04462	73.0243	4.86597	1.58787	0.473266
T1C;T26G	0.00321375	0.000529742	19.5961	2.13273	82.1235	4.31319	62.5275	4.81167	1.93022	0.542626
T1C;T27A	0.00478265	0.00139904	16.0464	2.09212	100	9.93799	83.9536	10.1558	1.12563	0.270904
T1C;T27C	0.000891458	0.000312825	32.9985	5.54948	92.081	4.21678	59.0825	6.96979	1.32968	0.587434
T1C;T27G	0.00409242	0.000816933	10.5772	1.48886	43.544	4.31958	32.9668	4.56897	3.42868	1.80245
T1C;T28A	0.00391898	0.00093478	13.5421	2.13074	96.8124	7.82496	83.2702	8.10988	1.25214	0.30474
T1C;T28C	0.00241603	0.000396841	11.5385	1.87159	74.4118	4.09243	62.8734	4.50009	1.94046	0.520625
T1C;T28G	0.00405554	0.000527998	14.8335	1.24538	51.4068	3.2571	36.5733	3.48707	4.79932	2.13539
T1C;T29A	0.00275759	0.000507009	9.75117	1.58633	82.8692	4.93695	73.118	5.18555	1.35237	0.286945
T1C;T29C	0.000267488	8.46e-05	33.2303	3.87387	88.4399	2.58886	55.2096	4.6593	0.838799	0.180151
T1C;T29G	0.00532711	0.0021627	10.3496	1.71179	55.5471	9.57165	45.1974	9.72351	1.64634	0.766636
T1C;C30A	0.00482031	0.000567202	12.7653	1.94427	74.1493	4.56989	61.384	4.96629	4.23086	2.38917
T1C;C30G	0.00349594	0.00132996	7.9905	2.0993	77.5595	10.6721	69.569	10.8766	1.33364	0.484291
T1C;C30T	0.00290259	0.000555751	12.5071	1.8536	94.3998	5.54738	81.8926	5.84887	1.22601	0.250096
T1C;C31A	0.00301467	0.00057937	8.19035	1.75691	55.9121	6.72745	47.7217	6.95308	4.08388	2.55973
T1C;C31G	0.00560824	0.00119001	10.1253	1.36271	74.7064	6.78287	64.581	6.9184	1.82576	0.485999
T1C;C31T	0.003394	0.000800515	12.0531	1.96294	78.7607	6.7991	66.7076	7.07679	1.58994	0.441883
T1C;C32A	0.00146481	0.000209369	17.0551	2.62626	92.1775	2.90827	75.1224	3.91858	2.02861	0.518983
T1C;C32G	0.000517231	0.000170447	16.5104	4.40812	91.7532	5.23032	75.2428	6.84016	0.896743	0.239616
T1C;C32T	0.00108357	0.000226782	16.9032	3.44381	89.0413	3.90477	72.1381	5.20645	1.64729	0.524311
T1C;T33A	0.0013918	0.000126824	21.7627	1.67101	94.9238	1.49957	73.1611	2.24521	1.43075	0.17479
T1C;T33C	0.000937544	0.000323699	21.857	4.29433	89.1431	6.0763	67.2861	7.44061	0.975207	0.352795
T1C;T33G	0.0041439	0.00156352	25.2851	2.28994	44.5469	4.63966	19.2618	5.174	5	6.63175
T1C;C34A	0.00138379	0.000130524	18.0145	1.62821	93.4493	1.76224	75.4348	2.39928	1.53018	0.204334
T1C;C34G	0.000898463	0.000187288	25.4417	3.19279	91.5455	2.86936	66.1038	4.29268	1.44146	0.382589
T1C;C34T	0.00117044	9.91e-05	18.0165	1.31515	88.3742	1.49844	70.3577	1.99373	1.67243	0.214679
T1C;T35A	0.00131742	0.000340849	16.9381	3.79451	95.3306	5.62351	78.3926	6.78397	1.07824	0.308186
T1C;T35C	0.000818311	9.42e-05	15.4583	1.59016	94.4198	2.13283	78.9615	2.66037	0.856883	0.0821907
T1C;T35G	0.00242351	0.000197361	15.6432	1.17368	86.2637	2.01231	70.6206	2.32958	1.72418	0.224359
T1C;T36A	0.00145189	0.000387082	19.0664	3.63163	90.1283	5.95371	71.0619	6.97391	1.31436	0.461863
T1C;T36C	0.00266041	0.00179206	6.6152	2.34279	40.3827	11.1737	33.7675	11.4166	1.57853	1.30875
T1C;T36G	0.000208076	6.55e-05	24.0865	4.08133	92.4515	2.98857	68.365	5.05853	0.853999	0.182784
T1C;T37A	0.00172494	0.000679773	12.7584	3.44321	90.515	10.2961	77.7566	10.8566	0.991088	0.34956
T1C;T37C	0.00175192	0.000363866	22.9509	2.68107	79.1599	4.2789	56.209	5.04947	1.83891	0.620911
T1C;T37G	0.000353465	8.49e-05	13.4386	3.23078	92.3266	3.20263	78.888	4.54915	0.83146	0.137269
T1C;C38A	0.00129343	0.000367283	13.1628	2.94126	83.0208	6.27582	69.858	6.93086	1.25751	0.417954
T1C;C38G	0.00168211	0.000272125	17.8361	2.44977	87.8188	3.8471	69.9827	4.56087	1.81123	0.47467
T1C;C38T	0.00263891	0.00139	15.6769	3.03613	100	13.8091	84.3231	14.1389	0.78546	0.233485
T1C;A39C	0.000897686	0.00021888	23.8957	4.02016	81.3582	3.78786	57.4625	5.52355	2.52277	1.26584
T1C;A39G	0.00151004	0.000357949	12.2913	2.38669	78.8975	5.47252	66.6062	5.97032	1.44384	0.439999
T1C;A39T	0.00158255	0.000254037	17.1381	2.8885	80.7483	3.87765	63.6102	4.83524	2.74329	1.08141
T1C;T40A	0.00186968	0.000551132	16.6961	3.22694	85.2652	6.852	68.5692	7.57384	1.30985	0.449492
T1C;T40C	0.000827019	0.000155573	12.669	2.44578	87.1107	3.56998	74.4417	4.32742	1.35153	0.316401
T1C;T40G	0.0024281	0.000341861	12.6002	1.42283	77.3504	3.55164	64.7502	3.82604	1.66658	0.320542
T1C;T41A	0.00106456	0.00035169	21.2297	3.54043	87.9623	6.31579	66.7326	7.24043	1.04018	0.343321
T1C;T41C	0.00226189	0.000415519	18.2626	2.28289	89.4528	4.45452	71.1902	5.00543	1.3542	0.32525
T1C;T41G	0.00601096	0.00403049	8.05694	1.65492	81.5352	20.2159	73.4783	20.2835	1.03935	0.358821
T1C;G42A	0.00187223	0.000238449	16.8654	1.50419	83.463	3.24612	66.5976	3.57769	1.58102	0.307788
T1C;G42C	0.00123312	0.000157652	18.3384	1.8575	80.0508	2.74546	61.7125	3.3148	2.06216	0.498747
T1C;G42T	0.00169725	0.000342202	20.2179	2.61698	85.4668	4.57859	65.2488	5.27371	1.55692	0.44204
T1C;C43A	0.00284177	0.000533909	11.2655	1.89114	78.2761	5.2503	67.0106	5.58051	1.67927	0.435772
T1C;C43G	0.0331288	0.14198	7.14238	1.95449	100	211.104	92.8576	211.113	0.952055	0.762973
T1C;C43T	0.00105785	0.00022227	16.8704	3.02116	80.5892	4.07248	63.7189	5.07074	2.21709	0.845028
T1C;G44A	0.126689	1.93605	7.70622	2.58057	100	519.931	92.2938	519.938	0.57224	0.688864
T1C;G44C	0.00149712	0.000427149	17.0635	3.77859	87.6323	5.91736	70.5688	7.02089	1.44233	0.540759
T1C;G44T	0.00939195	0.00889458	11.5172	1.75202	100	31.8744	88.4828	31.9225	0.851924	0.281012
T1C;C45A	NA	NA	NA	NA	NA	NA	NA	NA	NA	NA
T1C;C45G	0.0115776	0.00664694	10.5116	1.54905	57.8901	20.4112	47.3785	20.4699	2.16202	1.29164
T1C;C45T	0.00194079	0.000617267	15.9786	2.68571	77.425	7.31018	61.4464	7.78792	1.47194	0.575186
T1C;G46A	2.01e-05	7.81e-06	45.0826	5.15484	87.444	1.53466	42.3614	5.37843	1.1436	0.39865
T1C;G46C	0.00492357	0.00173797	15.2366	2.00509	82.4079	10.9648	67.1713	11.1466	1.3503	0.452834
T1C;G46T	0.00275568	0.00120043	46.9499	4.28513	75.3044	7.18039	28.3545	8.36184	5	11.395
T1C;G47A	0.0138524	0.0783673	27.0523	5.83353	100	108.149	72.9477	108.306	0.52593	0.543067
T1C;G47C	0.00291693	0.00136146	24.5103	2.37638	60.5693	7.05634	36.0589	7.44574	1.35267	0.732558
T1C;G47T	0.00438866	0.00168664	35.3734	1.94559	70.4955	6.5091	35.1221	6.79365	1.5826	0.789752
T1C;G48A	0.00514532	0.00599676	12.4702	1.28395	29.0034	8.59734	16.5332	8.69269	1.17346	1.00038
T1C;G48C	2.5	252.665	28.5926	5.11523	84.6958	593.539	56.1031	593.561	0.171825	0.508273
T1C;G48T	0.00275102	0.00126296	21.8517	2.67354	54.8131	7.09103	32.9614	7.57829	1.77681	1.21831
T1C;G49A	0.0283936	0.151975	11.7089	2.24337	66.6801	177.241	54.9712	177.255	1.11052	1.40025
T1C;G49C	0.00240355	248136	10.0962	5.17358	3.27402	6.02937	-6.82214	7.94476	8.21e-09	0.222315
T1C;G49T	0.0178366	0.260134	6.5035	0.81742	15.9794	179.43	9.47595	179.431	5	143.299
T1C;A50C	NA	NA	NA	NA	NA	NA	NA	NA	NA	NA
T1C;A50G	0.00330066	0.00100007	21.6647	2.83309	54.4989	5.98462	32.8342	6.62133	5	4.42316
T1C;A50T	1.25e-07	2.97726	5.72917	2.62854	14.6772	3.96486	8.948	4.75703	4.38e-09	0.128233
T1C;C51A	0.0263965	0.450064	28.5114	1.75218	100	2399.55	71.4886	2399.55	3.69415	36.5755
T1C;C51G	1.25e-07	3.83904	20.5882	4.49137	26.0115	9.43744	5.42331	10.4517	1.74e-08	0.276068
T1C;C51T	0.0163663	0.0487435	26.4531	3.59105	100	102.509	73.5469	102.572	0.989423	0.935862
T1C;G52A	0.001702	0.000705783	29.334	2.97309	58.9256	5.17163	29.5916	5.96532	1.9575	1.4578
T1C;G52C	0.00155618	0.00185116	18.9079	4.51213	59.0554	14.6253	40.1475	15.3055	0.789648	0.592031
T1C;G52T	2.5	551.763	26.0141	6.01727	66.4601	736.199	40.446	736.223	0.141228	0.863677
T1C;A53C	0.00482933	0.00136186	11.8576	1.28113	24.8752	3.08417	13.0176	3.33967	5	9.87645
T1C;A53G	0.00360787	0.000588953	8.67082	0.978029	61.0616	3.94747	52.3908	4.06682	1.75771	0.364579
T1C;A53T	1.25e-07	7.11904	13.964	3.65277	9.421	1.51945	-4.54296	3.95619	3.40774	4.29009e+07
T1C;C54A	0.00864833	0.00460382	17.3054	1.67953	39.1302	6.854	21.8249	7.05678	5	5.53118
T1C;C54G	NA	NA	NA	NA	NA	NA	NA	NA	NA	NA
T1C;C54T	0.0022335	0.00197519	7.53534	1.96284	13.5886	3.75689	6.05327	4.23875	5	21.9064
T1C;C55A	0.0030642	0.00158943	12.4073	1.83563	47.5253	7.82857	35.1181	8.04089	1.28471	0.639165
T1C;C55G	NA	NA	NA	NA	NA	NA	NA	NA	NA	NA
T1C;C55T	0.00318527	0.00244978	12.3363	3.3178	100	18.8146	87.6637	19.1049	0.648484	0.198595
T1C;C56A	0.0155484	0.0484004	8.57652	3.33005	100	127.901	91.4235	127.944	0.962078	0.881313
T1C;C56G	0.0272547	5.96956	11.6949	2.16137	100	55972.3	88.3051	55972.3	5	575.604
T1C;C56T	0.00479585	0.00240907	12.9526	2.03903	64.9105	12.1504	51.9579	12.3203	1.32904	0.608432
T1C;T57A	0.0041061	0.00112848	11.105	1.49973	60.0004	6.65512	48.8954	6.82201	1.69774	0.558433
T1C;T57C	0.00136514	0.000110905	15.828	1.21712	84.6764	1.9186	68.8484	2.27209	2.13717	0.322003
T1C;T57G	0.0137381	0.0507403	9.46018	3.79971	100	90.1953	90.5398	90.2753	0.535041	0.324512
T1C;G58A	0.00116213	0.000369368	25.1108	3.51955	83.1512	5.33512	58.0403	6.39146	1.28197	0.491303
T1C;G58C	0.00100237	0.000550486	21.6411	5.49799	86.9175	9.77349	65.2764	11.2138	0.861152	0.385914
T1C;G58T	0.00167908	0.000312116	20.5726	1.94451	80.1688	3.79151	59.5962	4.26107	1.30743	0.294744
T1C;C59A	0.00103034	0.00042234	21.3854	4.9048	87.3266	7.52534	65.9412	8.98264	1.11408	0.514288
T1C;C59G	0.00078469	0.000113821	18.8187	1.9545	76.8708	2.54663	58.0521	3.2102	1.92317	0.491294
T1C;C59T	0.000327036	0.000205547	23.3692	6.97368	85.083	6.8375	61.7138	9.76645	0.835096	0.363853
T1C;A60C	0.00343858	0.00238867	12.0348	3.46519	100	20.0327	87.9652	20.3302	0.81708	0.319382
T1C;A60G	0.00105096	0.000263517	11.9372	2.40483	84.3625	5.19409	72.4254	5.72379	1.07262	0.261958
T1C;A60T	0.0027758	0.000231706	11.8273	0.838495	48.533	2.0176	36.7058	2.1849	5	2.57751
T1C;G61A	0.000303673	0.000117888	5.47795	1.62714	94.6296	5.89448	89.1517	6.11494	0.48719	0.0664275
T1C;G61C	0.000405577	0.000184182	14.2021	4.74609	80.7254	6.12691	66.5234	7.75012	0.99546	0.359748
T1C;G61T	0.00117415	0.00124971	12.421	5.8024	100	20.5122	87.579	21.3171	0.539852	0.216446
T1C;A62C	0.00027139	3.53e-05	24.1476	2.04377	93.6899	1.17725	69.5424	2.35858	0.893638	0.0826069
T1C;A62G	0.00306831	0.0092259	31.526	6.99007	100	44.3654	68.474	44.9127	0.465191	0.339805
T1C;A62T	0.0024763	0.000760958	16.8501	1.96015	79.1395	6.97763	62.2894	7.24772	1.06709	0.289378
T1C;G63A	0.00377532	0.000534612	11.1899	1.30688	82.8487	4.2881	71.6588	4.48283	1.69406	0.310495
T1C;G63C	0.0029645	0.000425365	10.1277	2.19145	80.0838	4.55669	69.9561	5.05627	2.80932	0.976755
T1C;G63T	0.00102907	8.13e-05	12.3225	1.43486	94.7164	1.12874	82.3939	1.82562	1.58284	0.166677
T1C;A64C	0.00268636	0.000414842	11.2614	1.56776	79.6547	4.13687	68.3933	4.42398	1.76425	0.400687
T1C;A64G	0.000853558	0.000221795	37.5263	3.87048	89.6083	3.23376	52.082	5.04359	1.56702	0.605167
T1C;A64T	0.00153994	0.000146563	12.078	1.76307	87.6644	2.13149	75.5864	2.76616	2.54852	0.530873
T1C;G65A	6.52e-05	1.59e-05	12.1603	5.24657	95.4671	1.48387	83.3068	5.45237	1.11967	0.228507
T1C;G65C	0.000182164	5.09e-05	11.7923	5.17085	91.7362	2.21438	79.9438	5.62505	1.66585	0.504996
T1C;G65T	6.28e-05	5.49e-06	23.0653	3.26573	90.1638	0.982	67.0986	3.41018	3.68883	0.873689
T1C;G66A	3.9e-05	1.04e-05	34.6291	6.06126	92.3015	1.20975	57.6723	6.1808	1.60721	0.477635
T1C;G66C	0.000340642	8.1e-05	16.1016	3.69604	91.2927	2.31317	75.1911	4.36022	1.3513	0.311675
T1C;G66T	2.04e-05	9.81e-06	54.684	7.95449	92.84	1.48373	38.156	8.09168	1.67141	0.798301
T1C;C67A	9.93e-06	1.05e-05	33.6831	7.55508	89.0549	5.84595	55.3718	9.55272	0.458925	0.302948
T1C;C67G	0.000523983	0.000152683	16.0881	3.21336	75.3045	4.50919	59.2164	5.53701	1.47466	0.546536
T1C;C67T	0.00010968	7.66e-05	28.2792	5.52928	92.7334	7.04449	64.4542	8.95532	0.544542	0.187747
T1C;T68A	1.27e-05	1.98e-05	56.2886	8.6566	94.8475	7.63485	38.5589	11.5424	0.389152	0.360248
T1C;T68C	1.86e-05	7.16e-06	46.816	5.90992	85.4145	1.61305	38.5985	6.1261	1.67801	0.737444
T1C;T68G	0.000768432	0.000287795	9.46389	2.79659	77.0699	7.38689	67.606	7.89855	0.9432	0.269616
T1C;G69A	1.25e-07	679528	81.4653	6.1831	100	6.22127e+07	18.5347	6.22127e+07	1.21e-06	4.01062
T1C;G69C	0.0075743	0.0121398	87.9622	1.55024	100	9.87338	12.0378	9.99435	1.23546	1.51879
T1C;G69T	0.0190181	0.112703	91.5254	1.08228	99.6141	33.7211	8.08865	33.7385	1.51941	4.5243
T1C;A70C	1.76e-05	1.6e-05	60.7954	6.96847	93.6493	1.90832	32.8538	7.22504	0.742024	0.396544
T1C;A70G	0.000635481	0.000153305	25.3576	2.91261	98.0878	3.55961	72.7302	4.59936	0.780846	0.141926
T1C;A70T	0.00040649	0.000126843	53.4909	3.42435	95.1099	1.47265	41.6191	3.72758	1.44878	0.47157
T1C;A71C	0.000473578	0.000134829	37.0862	4.19745	95.2547	2.27723	58.1685	4.77539	1.09071	0.273035
T1C;A71G	0.000200383	8.48e-05	19.9225	6.91201	97.5707	3.50071	77.6482	7.74796	0.831594	0.214689
T1C;A71T	0.000493307	0.000166183	16.1218	5.31478	91.3078	4.06169	75.186	6.68911	1.06584	0.318724
T1C;A72C	0.00115391	0.000269194	15.9215	3.29495	93.248	4.65594	77.3265	5.7039	0.998737	0.239241
T1C;A72G	0.00531452	0.00298682	4.37427	2.15088	83.3679	19.1931	78.9937	19.3133	1.23779	0.507674
T1C;A72T	0.0008912	0.000223738	19.6596	3.78712	96.1888	4.42096	76.5292	5.82127	0.924873	0.222732
T1G;T2A	0.00160944	0.000401013	20.6167	3.76061	86.533	5.68485	65.9163	6.81613	1.80237	0.711253
T1G;T2C	0.00392232	0.0011899	34.1988	2.33155	80.1536	6.52333	45.9548	6.92748	1.6385	0.720058
T1G;T2G	0.00479211	0.00191826	13.0988	2.35987	61.0118	10.4233	47.9129	10.6871	1.88861	1.18023
T1G;T3A	0.00298437	0.00360526	42.3009	4.13126	97.1906	19.3909	54.8898	19.8261	0.656514	0.347769
T1G;T3C	0.0247963	7.63464	69.8485	2.80139	100	22868.4	30.1515	22868.4	5	1105.1
T1G;T3G	0.00162693	0.000345697	58.9148	2.15792	86.0672	2.2441	27.1524	3.1133	2.99853	1.63455
T1G;C4A	0.00531862	0.0510461	65.1834	4.58545	100	50.5811	34.8166	50.7885	0.309823	0.355621
T1G;C4G	2.05e-05	0.000104749	68.8511	3.2667	73.4321	1.42392	4.58099	3.56355	5	48.5654
T1G;C4T	0.00317349	0.001036	43.4768	2.19028	74.4823	4.73485	31.0055	5.21691	2.00491	1.14279
T1G;A5C	0.0258844	176424	65.0423	10.5804	78.5851	48.2612	13.5427	49.4074	9.93e-07	0.371997
T1G;A5G	NA	NA	NA	NA	NA	NA	NA	NA	NA	NA
T1G;A5T	0.000561425	0.000411137	11.9812	4.54713	43.5708	10.2558	31.5896	11.2186	2.65062	7.15686
T1G;G6A	4.7e-07	2.97091	75.1242	6.64289	88.3838	152.992	13.2595	153.136	3.9e-06	0.347241
T1G;G6C	NA	NA	NA	NA	NA	NA	NA	NA	NA	NA
T1G;G6T	2.79e-07	2.54397	68.3866	8.42636	88.8302	906.176	20.4436	906.215	9.59e-06	0.283881
T1G;C7A	0.499484	52.4214	71.8956	5.96694	100	515.987	28.1044	516.021	0.279565	1.32695
T1G;C7G	0.0283693	16.8743	72.3994	2.09861	100	50500.6	27.6006	50500.6	5	1361.02
T1G;C7T	1.42e-06	12.538	63.1944	9.48715	77.2016	24.3331	14.0071	26.1171	1.04e-07	0.325068
T1G;C8A	2.5	972.528	74.3962	7.90658	100	784.083	25.6038	784.123	0.136413	1.48314
T1G;C8G	0.00617791	0.0102603	78.6618	1.91859	85.5502	5.31366	6.88837	5.64942	4.70761	30.6423
T1G;C8T	2.07e-07	1.63932	67.6923	10.3981	84.0656	50.3491	16.3733	51.4116	7.91e-07	0.384617
T1G;G9A	0.0111522	0.0186091	11.4172	1.30868	50.1855	27.0714	38.7683	27.103	0.909602	0.497825
T1G;G9C	7.02e-07	17.5849	10.7831	3.80622	17.0066	6964.87	6.22356	6964.87	8.94e-05	0.393481
T1G;G9T	0.115892	2.55411	5.90583	2.36684	100	1074.81	94.0942	1074.81	0.761233	1.39346
T1G;G10A	NA	NA	NA	NA	NA	NA	NA	NA	NA	NA
T1G;G10C	NA	NA	NA	NA	NA	NA	NA	NA	NA	NA
T1G;G10T	0.00271911	199347	8.33333	8.18498	20.3057	11.9214	11.9724	14.4607	5.12e-09	0.238977
T1G;A11C	2.5	1087.34	36.7501	8.41412	0	1066	-36.7501	1066.03	0.118014	1.34514
T1G;A11G	0.00190965	0.000941794	55.3818	4.43753	81.9003	5.68449	26.5185	7.21145	3.2631	4.28555
T1G;A11T	0.00225045	230333	4.43038	6.20986	8.4211	8.92795	3.99072	10.8752	2.74e-08	1.38129
T1G;A12C	NA	NA	NA	NA	NA	NA	NA	NA	NA	NA
T1G;A12G	0.0291086	0.241569	23.0477	4.46959	100	160.204	76.9523	160.267	0.465851	0.460637
T1G;A12T	NA	NA	NA	NA	NA	NA	NA	NA	NA	NA
T1G;G13A	0.00743829	0.275172	47.5784	4.48747	100	139.468	52.4216	139.54	0.143795	0.282395
T1G;G13C	0.426182	18.0723	12.3892	3.6347	100	369.636	87.6108	369.654	0.173623	0.262548
T1G;G13T	3.97e-07	4.15897	29.5879	8.67895	62.1596	15052.2	32.5716	15052.2	8.83e-05	0.163908
T1G;C14A	0.000108195	790.966	73.6842	5.24949	89.5054	6.93637	15.8212	8.69887	2.76e-08	0.112867
T1G;C14G	3.36e-07	1.98236	80.5716	6.14288	75.0372	84.5154	-5.53431	84.7383	5.27e-06	0.888924
T1G;C14T	1.25e-07	1.47784	66.1654	6.00005	26.9501	30.9795	-39.2153	31.5552	9.17e-08	0.111049
T1G;G15A	0.0249114	1.80564e+06	8.37887	3.62427	7.15005	9.82457	-1.22882	10.4717	1.3e-07	1.35603
T1G;G15C	0.00323513	0.00428354	42.1508	2.26092	48.2467	4.35394	6.09589	4.90597	5	20.8058
T1G;G15T	0.515547	57.1876	23.1825	2.37677	100	5059.46	76.8175	5059.46	0.734225	3.07664
T1G;G16A	NA	NA	NA	NA	NA	NA	NA	NA	NA	NA
T1G;G16C	1.25e-07	2.73529	38.3562	10.5972	49.0991	25.3705	10.7429	27.4948	2.91e-08	0.431085
T1G;G16T	0.0404066	199.52	19.8073	2.47703	100	1.71922e+06	80.1927	1.71922e+06	5	2722.26
T1G;G17A	0.0558902	469346	29.6	5.14963	47.4676	10.3502	17.8676	11.5605	5.72e-08	0.192367
T1G;G17C	NA	NA	NA	NA	NA	NA	NA	NA	NA	NA
T1G;G17T	7.34e-06	116.917	35.6436	7.36605	40.5391	13.0876	4.8955	15.0181	4.49e-08	0.60288
T1G;A18C	NA	NA	NA	NA	NA	NA	NA	NA	NA	NA
T1G;A18G	1.25e-07	1.5397	18.1159	3.59845	13.9262	12.5777	-4.18973	13.0824	2.01e-07	0.563526
T1G;A18T	0.00141533	0.00164143	3.98578	1.74823	8.72945	2.96457	4.74367	3.44166	5	38.3944
T1G;C19A	NA	NA	NA	NA	NA	NA	NA	NA	NA	NA
T1G;C19G	NA	NA	NA	NA	NA	NA	NA	NA	NA	NA
T1G;C19T	1.25e-07	2.48236	41.1111	8.58803	31.4976	23.5201	-9.61348	25.039	2.83e-08	0.390428
T1G;G20A	0.0010141	0.00205742	64.0721	3.95747	71.7956	4.18279	7.72349	5.75824	5	43.8917
T1G;G20C	0.000455109	0.00273317	37.0126	6.1955	30.3059	9.02808	-6.70668	10.9495	0.785303	3.1432
T1G;G20T	0.000165233	1210.31	59.7938	5.94787	71.0077	7.44146	11.2139	9.52641	6.23e-08	0.20803
T1G;A21C	0.00545875	0.0114074	9.97611	1.81189	19.1014	10.148	9.12528	10.3084	1.59041	3.98879
T1G;A21G	0.0108502	0.0385297	44.3593	4.61291	100	67.5325	55.6407	67.6899	0.731208	0.78127
T1G;A21T	NA	NA	NA	NA	NA	NA	NA	NA	NA	NA
T1G;C22A	1.25e-07	0.000110028	43.1343	8.85199	46.5521	4.81748	3.41777	10.078	0.708433	134.255
T1G;C22G	NA	NA	NA	NA	NA	NA	NA	NA	NA	NA
T1G;C22T	0.0176431	0.0930273	51.9875	4.11729	0	108.711	-51.9875	108.789	0.800052	1.06232
T1G;C23A	0.926445	35.5872	63.7186	3.08107	0	310.714	-63.7186	310.729	0.208388	0.283137
T1G;C23G	NA	NA	NA	NA	NA	NA	NA	NA	NA	NA
T1G;C23T	0.000884951	0.00159012	51.4637	6.19466	29.0782	11.5808	-22.3856	13.1335	0.849735	1.25733
T1G;C24A	2.5	443.285	60.2808	8.4198	0	2278.29	-60.2808	2278.3	0.303815	1.72264
T1G;C24G	0.000329827	1830.34	66.1765	6.51372	85.7622	8.0332	19.5858	10.3422	3.56e-08	0.13178
T1G;C24T	0.0590509	27159.3	62.7796	1.77407	100	8.31041e+07	37.2204	8.31041e+07	5	42506.3
T1G;G25A	NA	NA	NA	NA	NA	NA	NA	NA	NA	NA
T1G;G25C	0.354771	8.79736	19.3823	0.860185	100	1130.36	80.6177	1130.36	0.730068	0.851529
T1G;G25T	1.25e-07	1.98692	31.3559	6.67269	51.0112	18.7186	19.6552	19.8723	1.86e-08	0.189985
T1G;T26A	0.00937612	0.00729255	43.6093	2.36319	78.4496	16.7962	34.8402	16.9616	1.72738	1.39551
T1G;T26C	0.00219269	0.000415663	45.0145	2.20587	80.0926	2.74037	35.0781	3.51788	3.17235	1.53911
T1G;T26G	3.85e-06	55.3322	52.4473	10.406	63.8686	17259.2	11.4213	17259.2	0.000210174	0.590843
T1G;T27A	0.00614279	0.00240336	31.2904	2.23627	75.0749	9.5568	43.7846	9.81495	1.86694	1.02549
T1G;T27C	0.00304201	0.000948835	44.6822	2.16513	77.1604	4.62619	32.4782	5.10778	1.97846	1.06049
T1G;T27G	0.00949651	0.0247511	27.2383	3.21322	33.822	9.48129	6.58365	10.011	5	40.2059
T1G;T28A	0.00476419	0.000606709	32.2035	1.84398	66.6989	3.4752	34.4954	3.93412	5	6.2416
T1G;T28C	NA	NA	NA	NA	NA	NA	NA	NA	NA	NA
T1G;T28G	NA	NA	NA	NA	NA	NA	NA	NA	NA	NA
T1G;T29A	0.00492801	0.00224819	20.5077	2.66716	73.2648	11.6175	52.7571	11.9197	1.54031	0.789633
T1G;T29C	0.0019554	0.00159708	46.2019	5.04021	85.1042	11.5792	38.9023	12.6286	1.07771	0.932541
T1G;T29G	0.00270424	0.0010752	18.3374	1.5685	30.6152	3.42175	12.2778	3.76412	5	13.636
T1G;C30A	0.00427647	0.00103518	13.5754	1.33253	46.9043	4.70548	33.3289	4.89052	2.3233	1.01495
T1G;C30G	0.00270293	0.000653646	9.56994	1.28702	26.6543	3.12093	17.0843	3.37589	5	8.30563
T1G;C30T	0.00545591	0.000454716	22.3479	1.1471	76.7024	2.65247	54.3544	2.88988	3.66523	1.34232
T1G;C31A	0.070856	0.788117	5.47844	3.03613	99.0978	284.565	93.6193	284.581	0.457381	0.414135
T1G;C31G	0.00903737	0.00935262	16.9101	2.52571	75.5139	31.15	58.6038	31.2523	1.32743	0.846531
T1G;C31T	0.00703175	0.00137608	14.2141	1.36488	72.018	6.49974	57.8039	6.6415	2.36218	0.780957
T1G;C32A	2.5	1497.79	28.1419	18.3787	100	2732.32	71.8581	2732.38	0.113821	1.80589
T1G;C32G	0.00154582	0.00166166	42.2609	5.80861	100	15.66	57.7391	16.7026	0.568769	0.290105
T1G;C32T	0.00301004	0.000573094	26.9824	1.98498	86.059	4.33532	59.0766	4.76814	1.50618	0.387978
T1G;T33A	0.00416431	0.000705491	42.0384	2.36147	82.0727	3.46542	40.0343	4.19353	3.86601	2.31352
T1G;T33C	1.91e-07	2.59977	39.0625	10.5443	75.9994	99.1349	36.9369	99.6941	4.45e-07	0.193778
T1G;T33G	NA	NA	NA	NA	NA	NA	NA	NA	NA	NA
T1G;C34A	0.00201234	0.000273752	30.1931	1.86067	80.2729	2.44363	50.0799	3.07139	2.31413	0.621474
T1G;C34G	0.00191284	0.000362443	47.626	2.1536	80.4271	2.46258	32.8011	3.27144	2.52171	1.07752
T1G;C34T	0.003222	0.000398865	22.0957	1.75806	82.2748	3.26114	60.1791	3.70484	2.25377	0.564793
T1G;T35A	1.12e-06	30.4495	32.323	28.2965	82.6709	644.489	50.3479	645.11	9.36e-07	0.267452
T1G;T35C	0.0118888	0.0141022	37.2954	2.34555	78.8664	30.5055	41.571	30.5955	1.52907	1.27424
T1G;T35G	0.0137586	0.02044	55.0218	1.38257	70.0274	26.1573	15.0056	26.1938	5	47.6224
T1G;T36A	0.00342116	0.000553038	26.6634	1.7803	79.4538	3.79382	52.7904	4.19077	1.89079	0.505699
T1G;T36C	0.00493757	0.00194376	13.4639	2.68801	32.3686	7.10047	18.9048	7.59223	5	19.0021
T1G;T36G	0.00130463	0.00026096	27.9242	3.036	82.1137	3.76663	54.1895	4.83785	2.19525	0.920555
T1G;T37A	0.00364535	0.000509382	23.4366	2.52394	80.1847	4.24461	56.7481	4.93832	4.01222	1.51263
T1G;T37C	1.25e-07	1.08292	73.2824	8.3756	78.0464	10.9717	4.76398	13.8032	1.82e-08	0.163511
T1G;T37G	0.00305781	0.00156898	34.8967	1.78405	57.6757	5.01262	22.779	5.32064	1.505	0.955545
T1G;C38A	0.00472925	0.00239355	21.107	2.05184	77.482	12.2864	56.375	12.4566	1.21262	0.479637
T1G;C38G	0.00327358	0.000665989	29.1524	2.58188	75.3886	4.2189	46.2362	4.94623	2.4989	1.13565
T1G;C38T	0.00300407	0.0008867	14.8277	2.92264	66.3554	7.9479	51.5277	8.46823	2.56797	1.57568
T1G;A39C	0.00191224	0.000492168	43.3238	2.35086	73.8806	3.46045	30.5567	4.18345	3.035	1.91622
T1G;A39G	0.0185994	0.0680085	46.4218	3.37606	100	108.687	53.5782	108.739	1.16102	1.49708
T1G;A39T	0.0127261	0.0397751	21.1039	4.0591	100	85.36	78.8961	85.4564	0.723907	0.586197
T1G;T40A	0.00431633	0.000875442	31.0859	2.53104	67.9736	4.83414	36.8877	5.45665	5	4.87151
T1G;T40C	0.00320616	0.000435251	26.4743	2.04729	78.7425	3.381	52.2682	3.95253	3.04526	0.986968
T1G;T40G	0.00431719	0.00287656	33.8238	2.77515	67.3402	10.7385	33.5164	11.0913	1.42747	1.06248
T1G;T41A	0.00426708	0.00196147	31.1122	3.64986	79.5861	10.9385	48.4738	11.5314	1.71854	1.1463
T1G;T41C	0.00463036	0.00070228	30.608	1.86052	62.4276	3.46374	31.8196	3.9318	4.3982	3.88139
T1G;T41G	0.00786635	0.00780272	33.1017	2.91921	51.8664	9.31092	18.7646	9.75782	5	10.2598
T1G;G42A	0.00466008	0.00144691	22.042	1.89897	75.9129	8.03453	53.8708	8.25589	1.56301	0.556251
T1G;G42C	0.00320587	0.00064682	29.5177	2.25251	65.9009	4.06691	36.3832	4.64904	4.7126	2.9218
T1G;G42T	0.00302346	0.000524874	23.5948	1.82067	65.6633	4.0403	42.0684	4.43157	2.87902	1.17494
T1G;C43A	0.00492719	0.000658028	14.7914	1.26343	40.5354	3.36864	25.7441	3.59778	5	6.74908
T1G;C43G	NA	NA	NA	NA	NA	NA	NA	NA	NA	NA
T1G;C43T	0.001999	0.000435932	17.9448	1.64441	58.0527	3.93235	40.1079	4.26233	1.99566	0.725248
T1G;G44A	0.0113666	0.00567884	10.989	1.68404	27.1682	9.21597	16.1792	9.36857	5	19.917
T1G;G44C	NA	NA	NA	NA	NA	NA	NA	NA	NA	NA
T1G;G44T	0.0008251	0.00194175	40.8263	3.33564	46.4408	3.71716	5.61446	4.99438	5	25.4367
T1G;C45A	2.5	579.749	34.9505	4.71926	3.98984	544.778	-30.9607	544.799	0.131861	0.837806
T1G;C45G	0.0143901	0.0267804	15.1991	1.13756	30.0202	30.1545	14.8211	30.176	5	44.4024
T1G;C45T	2.5	302.828	27.8308	5.64867	84.6552	578.175	56.8244	578.202	0.143786	0.491952
T1G;G46A	0.000850161	0.000262484	40.4398	3.82944	79.6828	3.68531	39.243	5.31471	3.72861	2.58524
T1G;G46C	0.000149648	0.000433339	80.0727	1.40597	73.6822	1.20305	-6.39054	1.85043	5	81.1727
T1G;G46T	0.00569869	0.0178752	76.2574	1.51905	73.3928	4.17403	-2.86462	4.44185	5	99.893
T1G;G47A	0.00536717	0.00215967	67.0848	2.37118	44.2673	6.26869	-22.8175	6.70216	4.29794	11.5728
T1G;G47C	0.000100782	8.4e-05	83.938	3.4574	68.5667	2.78946	-15.3713	4.44238	1.74522	2.44838
T1G;G47T	0.00012677	3.97e-05	77.1668	2.7015	64.119	2.18969	-13.0479	3.47748	5	41.3627
T1G;G48A	0.000422043	0.00111246	66.061	2.09179	53.2594	2.46457	-12.8015	3.23259	5	78.1445
T1G;G48C	NA	NA	NA	NA	NA	NA	NA	NA	NA	NA
T1G;G48T	NA	NA	NA	NA	NA	NA	NA	NA	NA	NA
T1G;G49A	NA	NA	NA	NA	NA	NA	NA	NA	NA	NA
T1G;G49C	NA	NA	NA	NA	NA	NA	NA	NA	NA	NA
T1G;G49T	NA	NA	NA	NA	NA	NA	NA	NA	NA	NA
T1G;A50C	0.0183051	1.6036	43.8872	8.5998	31.1147	173.118	-12.7725	173.332	0.295442	2.26347
T1G;A50G	1.25e-07	1.50827	29.5455	6.81615	43.5953	16.8889	14.0498	18.2125	1.76e-08	0.209615
T1G;A50T	5.02e-05	1820.07	8.51064	3.69148	15.823	5.67774	7.3124	6.77228	1.02e-08	0.26886
T1G;C51A	NA	NA	NA	NA	NA	NA	NA	NA	NA	NA
T1G;C51G	0.130783	4.49816	64.0473	5.01307	0	794.482	-64.0473	794.497	0.563963	1.58228
T1G;C51T	0.000205108	0.00209666	56.2933	5.88666	48.6688	5.34691	-7.62456	7.95249	5	99.7527
T1G;G52A	1.2e-06	6.4e-05	50.8837	8.53927	57.1023	4.89162	6.21853	9.84109	0.719036	15.7384
T1G;G52C	0.0119269	0.014385	22.1579	2.08903	34.0729	13.7626	11.9149	13.9203	3.02097	9.12569
T1G;G52T	0.0335508	55.1716	36.366	2.90657	100	395089	63.634	395089	5	1996.12
T1G;A53C	0.00452223	0.00256165	9.78188	1.39163	19.7039	4.1946	9.92198	4.41942	3.21929	5.99244
T1G;A53G	0.00609208	0.00419238	13.4871	2.42054	46.5631	10.3191	33.076	10.5992	5	15.1069
T1G;A53T	1.25e-07	2.93275	8.03571	2.55646	11.1708	12.225	3.1351	12.4895	1.29e-07	0.649773
T1G;C54A	NA	NA	NA	NA	NA	NA	NA	NA	NA	NA
T1G;C54G	6.53e-06	2.07e-05	10.1979	2.75503	5.16159	0.969544	-5.03635	2.92066	0.929675	2.58928
T1G;C54T	NA	NA	NA	NA	NA	NA	NA	NA	NA	NA
T1G;C55A	0.00547994	0.0141215	6.53716	1.51386	17.2168	12.2447	10.6797	12.3379	1.1766	2.10111
T1G;C55G	6.88e-05	0.00218865	20.5659	9.08268	27.1777	29.3949	6.61183	30.7662	0.307832	2.82197
T1G;C55T	0.00341539	0.0010697	28.416	1.78058	52.1129	3.82468	23.6969	4.21884	2.44211	1.57725
T1G;C56A	0.00233805	0.000708832	10.5207	1.55178	25.5888	3.23904	15.0681	3.59157	5	8.49451
T1G;C56G	0.0163249	0.0707386	5.60852	1.14857	29.3314	116.916	23.7229	116.922	5	57.8867
T1G;C56T	0.0177391	0.0286547	13.9396	1.60986	73.814	58.4788	59.8744	58.5009	1.28299	0.802048
T1G;T57A	0.00420885	0.00251536	4.10277	1.00596	32.3415	7.60422	28.2388	7.67047	1.3006	0.607914
T1G;T57C	0.00146223	0.000271673	8.23191	1.93658	71.5638	4.8761	63.3319	5.24659	2.24126	0.736788
T1G;T57G	0.0104733	0.00286317	6.78009	0.906824	34.1272	6.26157	27.3471	6.3269	3.4452	2.08069
T1G;G58A	0.00501656	0.00274765	13.1784	1.76306	73.8215	13.4046	60.6431	13.5201	1.06867	0.360428
T1G;G58C	0.00737259	0.00648916	40.1471	2.08964	74.9237	15.451	34.7766	15.5917	1.33036	0.913027
T1G;G58T	0.00386207	0.00188296	16.2068	2.56512	81.6135	12.1154	65.4067	12.384	1.09337	0.421118
T1G;C59A	0.0051059	0.00208372	67.3689	2.33942	79.586	4.01768	12.2171	4.64916	5	26.0869
T1G;C59G	0.0017586	0.00149667	36.3981	6.06598	74.0481	11.3621	37.65	12.8799	1.25671	1.35849
T1G;C59T	0.00296639	0.000850329	55.7348	1.97169	76.0757	3.13385	20.3409	3.70251	4.30676	4.37309
T1G;A60C	7.77e-07	12.729	71.1958	5.00117	53.7694	1238.56	-17.4264	1238.57	8.76e-06	0.254869
T1G;A60G	0.00240601	0.00071406	17.8888	2.01301	67.9168	5.93634	50.028	6.26836	1.38052	0.486416
T1G;A60T	0.200384	6.30557	16.1515	2.54589	100	1301.04	83.8485	1301.04	0.693295	1.44922
T1G;G61A	0.00563113	0.0101058	21.747	3.76583	100	36.6611	78.253	36.854	0.562031	0.259977
T1G;G61C	0.00452308	0.00218719	22.9855	1.85416	85.781	11.2148	62.7955	11.3671	0.927728	0.264097
T1G;G61T	0.00642124	0.00570641	26.483	2.86556	100	24.8247	73.517	24.9896	0.895156	0.397782
T1G;A62C	0.00116705	0.000141259	39.4639	1.95593	87.5258	1.62183	48.0619	2.54087	2.2107	0.546987
T1G;A62G	0.00287534	0.0020956	55.4331	2.80707	71.3989	5.33771	15.9659	6.03081	2.10311	2.90709
T1G;A62T	0.0120125	0.0198884	21.4882	2.53676	90.2598	46.3834	68.7716	46.4527	0.88702	0.490746
T1G;G63A	0.00583787	0.00129755	8.58685	1.16917	68.1278	7.03078	59.5409	7.12733	1.96571	0.572237
T1G;G63C	0.00413332	0.00049853	8.38955	1.13029	67.2078	3.60646	58.8183	3.77944	2.41112	0.58211
T1G;G63T	0.00370981	0.000687214	5.74893	1.18177	80.1798	5.81523	74.4309	5.9341	1.49118	0.307641
T1G;A64C	0.00394053	0.000586295	7.49117	1.10565	68.3053	4.13059	60.8141	4.27601	2.09194	0.501858
T1G;A64G	0.00266449	0.00069342	41.9641	3.73108	87.8549	4.63687	45.8908	5.9516	2.53591	1.41665
T1G;A64T	0.00480117	0.000700628	14.3545	0.853923	84.6621	4.35621	70.3076	4.43912	1.27612	0.165449
T1G;G65A	0.00137009	0.000121835	12.3657	1.34847	90.5872	1.74778	78.2215	2.20751	1.63212	0.22014
T1G;G65C	0.00233671	0.000399518	9.25008	1.77047	87.5227	4.59593	78.2726	4.92516	1.40621	0.299151
T1G;G65T	0.00175697	0.000173667	13.6134	1.39774	88.797	2.16688	75.1836	2.57857	1.56985	0.220045
T1G;G66A	0.0011174	0.000169014	21.5165	2.8016	89.8484	2.43737	68.3319	3.71345	1.88696	0.487868
T1G;G66C	0.000454382	9.76e-05	32.8899	3.18944	94.9543	1.68859	62.0644	3.60885	1.20971	0.248695
T1G;G66T	0.000341789	0.000231086	45.8712	4.09121	100	6.22979	54.1288	7.45307	0.467787	0.128775
T1G;C67A	1.25e-07	1.05272	53.7313	9.99576	81.9832	37.2204	28.2518	38.5392	1.32e-07	0.223723
T1G;C67G	0.00597756	0.0474957	32.8279	8.01242	100	91.3127	67.1721	91.6636	0.348156	0.360943
T1G;C67T	2.14e-07	2.30593	59.4059	8.75403	85.9334	87.8296	26.5274	88.2648	4.39e-07	0.247303
T1G;T68A	4.23e-06	45.7677	57.971	14.946	89.153	58.8294	31.182	60.6983	3.3e-07	0.258984
T1G;T68C	0.00391041	0.0119137	48.5314	6.46721	100	38.0529	51.4686	38.5985	0.51678	0.456862
T1G;T68G	0.00190209	0.000784937	14.5878	3.62656	59.054	9.39087	44.4662	10.0668	2.3827	1.8675
T1G;G69A	0.00347316	0.00268727	85.5119	1.34825	91.18	2.25208	5.6681	2.62481	5	10.4651
T1G;G69C	0.00230337	0.00105643	79.2482	1.84723	95.1561	2.51944	15.9079	3.12407	1.63523	1.14978
T1G;G69T	0.0031204	0.00178221	88.915	1.28328	95.0756	1.83759	6.16064	2.24133	5	8.7773
T1G;A70C	0.00188454	0.000253922	31.7284	2.33587	83.6867	2.28597	51.9583	3.26832	2.61554	0.789495
T1G;A70G	0.00169517	0.000406376	49.5136	2.42156	85.8366	2.83019	36.323	3.72477	1.92764	0.789974
T1G;A70T	0.00402573	0.0103492	68.7739	5.24446	100	25.1655	31.2261	25.7062	0.678567	0.848544
T1G;A71C	0.00208998	0.00042427	32.5083	3.0724	87.2259	3.53112	54.7176	4.68065	2.03443	0.774284
T1G;A71G	0.00172086	0.000340678	26.2217	3.5645	92.8218	3.33963	66.6002	4.88455	1.79659	0.575611
T1G;A71T	0.0042256	0.00124332	7.22705	1.67515	70.8526	9.0435	63.6255	9.19733	1.61627	0.557544
T1G;A72C	0.0276536	0.0424107	14.2193	1.06049	100	92.5585	85.7807	92.5645	1.32102	0.594101
T1G;A72G	0.0018663	0.000377387	26.0822	3.19577	90.8499	4.02825	64.7677	5.14196	1.48995	0.434317
T1G;A72T	2.5	603.526	24.0719	14.1265	100	1833.68	75.9281	1833.74	0.166477	1.18443
T2A;T3A	0.00018586	0.000173029	43.5631	7.92732	83.3887	5.46942	39.8255	9.63104	0.745378	0.410007
T2A;T3C	0.000454925	0.000211728	5.71442	2.28583	70.1976	6.94937	64.4832	7.31565	0.786959	0.185198
T2A;T3G	0.0003179	0.000104822	8.12206	3.71739	84.571	4.87088	76.4489	6.12735	0.969781	0.237715
T2A;C4A	0.00167947	0.00894001	11.403	3.37059	75.9477	48.9828	64.5447	49.0986	0.307929	0.203819
T2A;C4G	0.000195187	0.000107334	8.21813	2.63165	61.3647	6.01153	53.1466	6.56232	0.796234	0.252539
T2A;C4T	0.00305691	0.00988074	11.7291	1.84368	92.5214	35.5974	80.7923	35.6452	0.286452	0.0957364
T2A;A5C	0.000348375	0.000292979	23.203	4.10105	66.71	7.97113	43.5071	8.96424	0.706727	0.312213
T2A;A5G	0.000459957	0.000207454	15.5201	5.03061	93.1534	7.23234	77.6333	8.80987	0.700014	0.193363
T2A;A5T	6.19e-05	5.97e-05	1.59104	1.59351	21.8769	4.30874	20.2858	4.59397	5	21.785
T2A;G6A	1.25e-07	0.415594	69.7417	6.38324	100	44.613	30.2583	45.0674	7.98e-07	0.0780301
T2A;G6C	0.00398373	0.0106011	72.1307	4.10199	100	19.9046	27.8693	20.3229	0.562222	0.541562
T2A;G6T	8.35e-05	0.000120679	66.6108	4.18846	91.8742	5.50609	25.2634	6.91811	0.435858	0.264421
T2A;C7A	0.00850359	0.103842	76.4858	4.22408	100	43.5199	23.5142	43.7244	0.30059	0.419478
T2A;C7G	7.13e-06	23.5566	77.1429	5.70719	96.7302	10.3355	19.5874	11.8066	1.77e-07	0.124937
T2A;C7T	0.000246123	0.0001684	41.3265	5.63997	100	6.23471	58.6735	8.40719	0.474586	0.144143
T2A;C8A	3.23e-06	9.27e-06	58.2007	8.29634	100	18.829	41.7993	20.5757	0.213341	0.335785
T2A;C8G	NA	NA	NA	NA	NA	NA	NA	NA	NA	NA
T2A;C8T	0.000150763	0.000123037	41.9368	9.71778	100	4.84087	58.0632	10.8568	0.558136	0.223264
T2A;G9A	0.00577324	0.000658166	6.676	0.881685	74.7984	4.58003	68.1224	4.66412	2.87145	0.713235
T2A;G9C	0.0382765	0.575142	7.68115	1.26055	100	2388.53	92.3188	2388.53	2.57965	10.2023
T2A;G9T	0.0191984	0.047251	2.45557	0.654207	37.8088	47.7976	35.3532	47.8021	1.09922	0.694997
T2A;G10A	0.00227606	0.000362271	13.4602	2.15111	87.6493	4.08866	74.1891	4.62	1.7113	0.399867
T2A;G10C	0.00424777	0.00126	11.9347	1.54264	62.0291	7.38396	50.0944	7.54338	1.73262	0.664193
T2A;G10T	0.0211693	0.0761633	6.28506	2.63653	100	144.713	93.7149	144.737	0.832715	0.629093
T2A;A11C	0.00234745	0.00432895	11.6973	4.2173	41.61	19.8161	29.9127	20.2599	0.968497	1.27613
T2A;A11G	7.42e-05	3.23e-05	31.5897	7.34834	89.6436	2.2025	58.0539	7.67131	1.05523	0.373368
T2A;A11T	0.00457253	0.00055571	6.21026	0.564819	39.8691	2.92321	33.6589	2.97728	3.11876	0.842531
T2A;A12C	0.00196968	0.00497478	6.11574	3.28516	26.5003	16.5135	20.3845	16.8371	0.754668	0.945493
T2A;A12G	0.0014275	0.000503334	6.14333	2.83	86.3906	9.07561	80.2473	9.5066	1.34551	0.513692
T2A;A12T	0.000433495	0.00117681	3.6334	1.04569	9.47896	1.66575	5.84556	1.96677	5	95.3608
T2A;G13A	1.25e-07	0.757351	31.4712	11.2362	100	34.1026	68.5288	35.906	4.15e-08	0.0911548
T2A;G13C	0.000313432	0.000143912	8.68611	2.89852	63.5051	5.72425	54.819	6.41626	0.98213	0.304505
T2A;G13T	0.000107987	4.3e-05	12.4726	4.32845	68.4686	3.91287	55.9961	5.83489	1.05631	0.378203
T2A;C14A	NA	NA	NA	NA	NA	NA	NA	NA	NA	NA
T2A;C14G	1.18658	1025.05	17.8305	9.76898	0	993.149	-17.8305	993.197	0.118348	3.07224
T2A;C14T	0.00112725	0.00157873	5.94093	3.32048	22.0634	8.44014	16.1224	9.06982	1.24617	2.10264
T2A;G15A	NA	NA	NA	NA	NA	NA	NA	NA	NA	NA
T2A;G15C	0.0282763	0.0925163	9.47813	1.87654	100	165.445	90.5219	165.456	1.03534	0.749969
T2A;G15T	0.0114674	0.0291386	6.10881	1.70367	30.4736	37.3526	24.3648	37.3914	1.47265	2.304
T2A;G16A	0.0189639	1.14775e+06	1.92308	3.56294	12.3584	6.34356	10.4353	7.27566	8.82e-09	0.239733
T2A;G16C	0.000971272	0.000554587	6.50023	2.34636	24.4981	4.47155	17.9979	5.04977	2.74601	3.22055
T2A;G16T	0.00232769	0.00150674	5.59927	3.2377	19.9157	6.5493	14.3164	7.30589	5	13.2991
T2A;G17A	0.0553788	0.625865	12.155	3.3447	100	416.81	87.845	416.823	0.706684	0.981829
T2A;G17C	0.00856634	0.00579188	28.3279	2.73845	73.2578	18.0793	44.93	18.2856	1.89913	1.46516
T2A;G17T	1.25e-07	5.87527	2.94118	7.80934	48.2329	99.852	45.2917	100.157	9.83e-08	0.204863
T2A;A18C	0.00498985	81082.7	5.05618	3.09216	21.6179	18.4827	16.5617	18.7396	1.35e-07	0.173222
T2A;A18G	0.00290307	0.00161824	11.4801	1.36347	20.1635	3.02482	8.68339	3.31792	5	13.6331
T2A;A18T	0.000636035	0.00203635	6.3471	1.48185	8.82253	1.9118	2.47543	2.41886	5	60.7305
T2A;C19A	0.615775	51.6634	25.6911	11.6167	100	871.944	74.3089	872.021	0.229339	0.766736
T2A;C19G	1.25e-07	4.42798	11.7021	4.93251	15.2229	16.158	3.52076	16.8941	6.99e-08	0.919112
T2A;C19T	0.013819	0.0283145	9.84386	1.35154	19.6183	23.481	9.77448	23.5199	5	63.3691
T2A;G20A	0.179252	16.9614	33.4728	14.0782	100	731.352	66.5272	731.488	0.205	0.87332
T2A;G20C	0.00377761	0.00760938	26.5601	2.64115	31.1645	4.65407	4.60437	5.35126	4.35889	25.5666
T2A;G20T	0.0680659	1.85093	47.7984	3.2392	100	965.096	52.2016	965.101	1.04237	3.72663
T2A;A21C	0.00740857	0.0556841	7.17706	2.31707	18.9583	32.5594	11.7812	32.6417	0.839637	2.25093
T2A;A21G	0.000675521	0.000114494	17.4464	2.86545	85.5718	2.87899	68.1254	4.06194	2.17914	0.710525
T2A;A21T	0.0208893	0.100251	9.60953	2.45907	65.978	112.294	56.3684	112.321	0.805346	0.845629
T2A;C22A	0.0350486	0.154668	14.5981	2.09904	100	262.042	85.4019	262.05	1.21917	1.23094
T2A;C22G	0.031113	785587	4.94543	2.69198	3.53651	4.06921	-1.40892	4.87906	8.52e-08	0.791384
T2A;C22T	8.79e-05	0.00026275	9.81393	5.85594	14.6709	3.04478	4.85695	6.60021	3.67255	21.9114
T2A;C23A	1.09e-05	1.49e-05	1.52557	2.10218	13.1856	2.20975	11.6601	3.04994	1.18851	2.25352
T2A;C23G	0.0374954	416234	39.0645	5.78945	47.1894	9.0589	8.12489	10.7509	1.46e-07	0.499103
T2A;C23T	2.5	208.148	3.52127	6.52054	100	1556.64	96.4787	1556.65	0.278962	0.705873
T2A;C24A	0.00112317	0.00178671	14.7218	4.21062	22.873	5.12744	8.15119	6.63475	5	58.8145
T2A;C24G	0.00173785	0.00318338	22.8907	4.87705	48.4135	15.1945	25.5229	15.9581	0.796167	1.00041
T2A;C24T	0.00291898	0.000234697	26.651	1.42462	81.5916	1.96003	54.9406	2.42306	3.39421	0.768467
T2A;G25A	0.00268264	0.00111893	4.1582	1.27001	25.5624	5.10911	21.4042	5.26459	2.36632	2.06398
T2A;G25C	4.23e-06	287.169	6.875	6.56197	22.6197	96.3851	15.7448	96.6082	1.85e-07	0.315175
T2A;G25T	0.0253442	0.0576657	8.00682	1.75883	100	168.457	91.9932	168.467	1.5388	1.23788
T2A;T26A	0.00145626	0.000286966	28.3192	3.14811	95.8875	3.15784	67.5683	4.45899	1.21976	0.300775
T2A;T26C	0.000832683	0.000118432	25.7084	2.58341	94.6441	1.67162	68.9357	3.07706	1.53705	0.29411
T2A;T26G	0.00162752	0.000244328	25.4234	2.41685	92.2583	2.64124	66.8349	3.58013	1.39765	0.277844
T2A;T27A	0.00197337	0.00020485	21.3362	1.76599	94.1291	2.13045	72.7928	2.76722	1.53654	0.236847
T2A;T27C	0.000527486	0.000136143	34.6062	3.86427	95.8272	1.83847	61.2211	4.27932	1.26367	0.319234
T2A;T27G	0.00432083	0.000495747	13.118	1.1139	65.3558	3.15318	52.2378	3.34414	2.28995	0.498897
T2A;T28A	0.00219838	0.00017625	20.9356	1.69183	93.2093	1.55333	72.2737	2.29676	2.1466	0.322827
T2A;T28C	0.0020723	0.000334847	16.4257	2.40542	92.3228	3.71002	75.8971	4.42157	1.47886	0.33502
T2A;T28G	0.00327195	0.00083065	21.9525	2.2197	75.0685	5.78561	53.116	6.19681	1.63022	0.582007
T2A;T29A	0.00237019	0.000173311	13.6654	0.908939	96.5003	1.99441	82.8349	2.19176	1.21312	0.103989
T2A;T29C	0.000122211	4.21e-05	48.2404	3.02147	95.5221	2.02158	47.2817	3.6354	0.596224	0.105265
T2A;T29G	0.00307843	0.00108093	10.5272	3.02347	58.6515	8.3761	48.1244	8.90507	2.45229	1.78752
T2A;C30A	0.00380528	0.000298564	8.38913	0.528006	68.4114	2.32626	60.0223	2.38543	1.90446	0.202898
T2A;C30G	0.00382521	0.000421379	10.0245	0.951523	53.7471	2.97029	43.7226	3.11898	3.55027	1.00378
T2A;C30T	0.00245996	0.000277864	15.02	1.66684	91.6192	2.68055	76.5992	3.15654	1.71331	0.293382
T2A;C31A	0.00417044	0.00190331	5.4699	1.52617	69.486	11.7771	64.0161	11.8756	1.32585	0.452243
T2A;C31G	0.00161747	0.000264311	11.0107	1.72718	80.4982	4.06866	69.4875	4.42008	1.44547	0.320373
T2A;C31T	0.00403725	0.00135681	8.27523	1.60449	88.0926	11.0534	79.8174	11.1693	1.23715	0.345717
T2A;C32A	0.00112153	0.00011106	24.6309	1.63969	92.3082	1.4263	67.6773	2.17322	1.57661	0.221331
T2A;C32G	0.00011013	3.27e-05	40.4524	4.52037	80.9018	2.17086	40.4494	5.01461	5	9.82862
T2A;C32T	0.000941411	9.83e-05	16.2736	1.92722	87.0373	2.01341	70.7637	2.78711	2.32999	0.454432
T2A;T33A	0.000849737	8.43e-05	26.4736	1.79037	96.4725	1.01538	69.999	2.05826	1.51515	0.190725
T2A;T33C	0.000417555	0.000124517	20.3695	4.00955	100	3.93639	79.6305	5.61887	0.618854	0.106078
T2A;T33G	0.00179715	0.000704999	39.3995	3.03123	76.6687	5.08429	37.2692	5.91932	1.4177	0.722568
T2A;C34A	0.000818496	6.03e-05	24.0814	1.38789	95.9951	0.762013	71.9137	1.58332	1.45744	0.130206
T2A;C34G	0.00029536	8.19e-05	34.9058	3.85841	97.3131	2.06801	62.4073	4.37767	0.773493	0.135386
T2A;C34T	0.00113963	0.000181731	21.55	2.56337	93.7674	2.54937	72.2174	3.61527	1.29718	0.25614
T2A;T35A	0.00088731	0.000172674	24.7135	3.05585	93.0349	2.7391	68.3214	4.10376	1.21906	0.26843
T2A;T35C	0.00078087	0.000104693	30.9766	2.09149	96.4087	1.46932	65.432	2.55602	1.1672	0.164589
T2A;T35G	0.000642194	0.00010736	21.3753	2.85549	94.8687	1.71676	73.4934	3.33183	1.38329	0.262488
T2A;T36A	0.0012465	0.000275216	13.1733	2.96352	89.3508	4.76703	76.1776	5.61311	1.50439	0.459622
T2A;T36C	0.00170107	0.000682258	5.58542	2.20483	59.3058	8.39862	53.7203	8.6832	1.53403	0.828283
T2A;T36G	0.00044312	0.000130092	30.7962	4.00706	88.9178	2.89312	58.1216	4.94234	1.5014	0.542
T2A;T37A	0.00113445	0.000216914	9.00251	2.00322	84.2638	4.26317	75.2612	4.71036	1.14958	0.234641
T2A;T37C	0.00109078	0.000270959	29.7274	3.91733	93.1217	3.86916	63.3944	5.50599	1.25508	0.397299
T2A;T37G	0.000174479	3.83e-05	5.40044	2.05328	86.6383	2.88061	81.2379	3.5375	0.806488	0.115511
T2A;C38A	0.00148757	0.000339721	13.1051	2.92875	86.84	5.40162	73.7349	6.14452	1.73158	0.577905
T2A;C38G	0.000992243	0.000227363	13.0991	2.46878	82.5068	4.69702	69.4076	5.30631	1.19733	0.304951
T2A;C38T	0.00113636	0.000246188	8.11649	2.77522	86.2356	4.99997	78.1191	5.71852	2.01491	0.740623
T2A;A39C	0.00063361	0.000207067	14.4232	3.6003	89.1551	5.75352	74.7319	6.78713	0.973416	0.263714
T2A;A39G	0.00118822	0.000199119	18.5038	2.26674	88.7135	3.21483	70.2097	3.9336	1.53074	0.355064
T2A;A39T	0.000858736	0.000311014	12.7934	4.15751	97.0461	7.41308	84.2527	8.49933	0.77582	0.211953
T2A;T40A	0.00123867	0.000188639	12.5718	1.74356	78.8805	3.47418	66.3087	3.88715	1.74561	0.431447
T2A;T40C	0.000849872	0.000261645	13.2117	3.71987	85.9892	5.95336	72.7776	7.01996	1.27413	0.467576
T2A;T40G	0.0013432	0.000239387	8.72171	2.74017	79.2299	4.78245	70.5081	5.51184	2.66566	0.999486
T2A;T41A	0.00109345	0.000279138	10.9498	1.68123	100	5.18442	89.0502	5.4502	0.643821	0.0790151
T2A;T41C	0.00128928	0.00039205	13.901	3.48568	90.8914	7.14088	76.9903	7.9462	1.09973	0.366834
T2A;T41G	0.00319603	0.000454178	7.94598	1.22369	76.4363	4.14932	68.4903	4.326	1.92069	0.413008
T2A;G42A	0.00166062	0.000287432	11.2578	2.54674	84.0118	4.74885	72.754	5.38865	2.36199	0.780408
T2A;G42C	0.00125861	0.000286248	17.0907	3.82366	93.0075	4.15087	75.9167	5.64359	1.64107	0.532935
T2A;G42T	0.00120478	0.00020208	16.1552	2.59555	90.4518	3.60981	74.2966	4.44607	1.6112	0.400311
T2A;C43A	0.0023033	0.00046423	6.39608	1.58909	84.2345	5.93629	77.8384	6.1453	1.32395	0.293663
T2A;C43G	0.00508857	0.000461424	6.90419	0.765427	56.7406	3.19588	49.8364	3.28627	3.49665	1.06339
T2A;C43T	0.00126273	0.000177932	13.9688	1.80896	86.2162	3.19098	72.2474	3.66806	1.687	0.355075
T2A;G44A	0.0065119	0.00501442	6.33973	2.16461	41.8676	11.5989	35.5279	11.7992	5	12.8776
T2A;G44C	0.00148853	0.000296551	17.6913	2.91641	86.8284	4.51406	69.137	5.37421	1.68436	0.497061
T2A;G44T	0.00223731	0.000563874	6.86563	1.75026	85.6114	6.93782	78.7458	7.15519	1.07809	0.234007
T2A;C45A	0.213838	3.89666	3.72793	2.10745	100	569.589	96.2721	569.593	0.486155	0.517666
T2A;C45G	0.0119998	0.0199389	5.07431	1.60799	72.6991	48.8766	67.6248	48.9031	0.981199	0.525982
T2A;C45T	0.00208242	0.00242722	9.45852	3.52436	100	21.4675	90.5415	21.7549	0.467443	0.132363
T2A;G46A	8.29e-06	1.18e-05	31.1089	10.4277	84.2479	5.10384	53.139	11.6097	0.568632	0.470238
T2A;G46C	0.00264064	0.000475204	17.28	2.31598	84.1901	4.66118	66.91	5.20484	1.81472	0.513754
T2A;G46T	0.00069908	0.000338703	55.513	3.98946	83.282	3.25544	27.769	5.14915	5	5.93735
T2A;G47A	0.000977733	0.000228631	45.4326	2.17177	89.2744	2.71334	43.8417	3.47546	0.958821	0.229091
T2A;G47C	0.00310818	0.000964045	32.0791	2.76213	80.1385	6.41968	48.0594	6.98867	1.65947	0.791069
T2A;G47T	0.00591204	0.00426591	35.6007	2.18728	89.8868	15.3313	54.2861	15.4865	0.975809	0.404387
T2A;G48A	0.0430349	0.22443	8.05786	2.11298	100	139.384	91.9421	139.4	0.512253	0.286352
T2A;G48C	2.55e-07	3.19817	23.8806	11.7117	65.9583	91.6084	42.0777	92.354	3.11e-07	0.172058
T2A;G48T	0.00659875	0.00853137	17.2874	3.13468	87.4679	32.4116	70.1805	32.5629	0.839169	0.441311
T2A;G49A	0.0298818	0.0652538	9.5648	1.21958	100	122.351	90.4352	122.357	1.13563	0.577264
T2A;G49C	0.0620156	0.713258	5.21624	1.38399	100	1021.24	94.7838	1021.24	1.36133	2.21481
T2A;G49T	0.00545329	0.00575627	4.55416	0.997467	9.35273	3.47454	4.79857	3.61488	5	42.0735
T2A;A50C	0.00793986	0.0145524	6.88619	2.22367	32.8917	26.4087	26.0055	26.5022	1.52945	2.12458
T2A;A50G	0.0144816	0.0248935	16.2049	3.98635	100	89.0842	83.7951	89.1734	1.44715	1.36859
T2A;A50T	0.00311075	0.00388235	12.5611	1.35369	16.8296	3.04226	4.26844	3.32984	5	22.9581
T2A;C51A	0.0411195	0.293603	20.5685	2.6685	100	332.089	79.4315	332.1	1.00622	1.30123
T2A;C51G	0.00631213	0.00207429	21.3963	0.711709	35.3241	2.52416	13.9277	2.62258	4.04001	4.41112
T2A;C51T	0.00421714	0.00142392	22.2441	2.84615	48.8575	5.82479	26.6134	6.48296	5	6.8269
T2A;G52A	1.25e-07	2.84297	30.9524	12.7967	51.8704	77.1256	20.918	78.18	2.66e-07	0.358664
T2A;G52C	0.0160796	0.069003	20.5371	4.04613	84.607	119.563	64.0699	119.631	0.912898	1.10931
T2A;G52T	1.25e-07	1.06775	16.0714	9.2061	52.3172	24.9466	36.2457	26.591	5.16e-08	0.139079
T2A;A53C	0.056125	0.47461	5.53761	2.1928	100	287.078	94.4624	287.087	0.603035	0.524915
T2A;A53G	0.00400369	0.00030462	13.2943	1.0736	76.3945	2.57586	63.1002	2.79064	3.22887	0.657149
T2A;A53T	0.000285934	0.00892214	9.7344	2.02938	8.91264	1.69036	-0.821754	2.64115	5	268.479
T2A;C54A	0.0369196	0.161658	19.9293	1.8313	100	218.75	80.0707	218.758	1.0912	0.965078
T2A;C54G	0.0045318	0.00498738	10.5422	2.37658	16.9326	5.9608	6.39044	6.41711	5	34.9503
T2A;C54T	2.5e-06	73.0947	5.97015	3.41346	11.7566	6.51546	5.78649	7.35546	1.21e-08	0.259129
T2A;C55A	0.0288113	0.112102	8.81463	2.24684	99.1599	160.242	90.3452	160.257	0.844286	0.622606
T2A;C55G	0.0306844	12.5498	27.3569	2.25336	100	101611	72.6431	101611	5	703.347
T2A;C55T	0.000734746	0.000301362	22.3727	4.97469	86.8365	6.33247	64.4638	8.05281	0.991844	0.391614
T2A;C56A	0.00337202	0.000738881	8.67634	1.76247	73.4625	5.88997	64.7861	6.14801	1.79816	0.548908
T2A;C56G	0.0269237	0.106253	5.99226	2.13534	100	343.599	94.0077	343.605	1.75412	2.60762
T2A;C56T	0.00367228	0.0020795	6.74403	2.32045	100	16.5031	93.256	16.6655	0.772392	0.216103
T2A;T57A	0.00593717	0.00428907	2.62682	1.4176	97.8211	23.5631	95.1943	23.6057	0.80735	0.206614
T2A;T57C	0.00126974	0.000206006	13.7512	1.48662	80.5411	3.58873	66.79	3.88446	1.56725	0.331127
T2A;T57G	0.00289263	0.00148423	9.38669	2.55144	52.9524	9.89891	43.5657	10.2224	1.74606	1.17539
T2A;G58A	0.0012137	0.000377707	14.8574	3.41736	93.3386	6.5494	78.4811	7.38735	0.92858	0.258184
T2A;G58C	0.000299485	5.58e-05	26.4504	2.41528	86.8191	1.59912	60.3686	2.89668	1.05508	0.162168
T2A;G58T	0.000657173	0.000150743	27.6308	3.37682	93.6694	2.5961	66.0386	4.25942	1.21382	0.296883
T2A;C59A	0.000131276	4.91e-05	34.7051	5.31119	91.7846	2.20797	57.0795	5.75186	0.965487	0.245975
T2A;C59G	0.000541325	9.59e-05	18.966	3.09281	73.5042	3.06746	54.5382	4.356	5	8.60412
T2A;C59T	0.000170948	0.000135309	26.787	7.90839	94.41	8.36561	67.6229	11.512	0.584994	0.241664
T2A;A60C	0.00222814	0.000491427	12.2748	2.58681	94.4499	6.34603	82.1751	6.853	1.34704	0.357952
T2A;A60G	0.000812499	0.000135842	11.6692	2.16154	76.3864	3.49874	64.7172	4.11259	2.52278	0.820659
T2A;A60T	0.00470651	0.00243514	8.84911	2.35982	79.9676	16.4064	71.1185	16.5753	1.3247	0.5662
T2A;G61A	0.000470981	0.000206209	7.93341	3.22436	88.9874	7.18929	81.054	7.87923	0.685038	0.157212
T2A;G61C	0.000249868	6.63e-05	11.517	3.91402	92.197	2.84668	80.68	4.83975	0.949276	0.174604
T2A;G61T	0.00042966	0.000185945	9.334	4.94648	91.9125	6.90851	82.5785	8.49677	0.791786	0.223684
T2A;A62C	0.000140884	1.98e-05	35.8242	2.0999	95.4746	0.763481	59.6505	2.23439	0.922601	0.0842093
T2A;A62G	0.00107504	0.000374062	40.8073	3.90874	81.0171	3.4515	40.2099	5.21451	5	10.1958
T2A;A62T	0.000493267	0.000160778	26.2032	4.41289	92.5952	3.58424	66.392	5.6851	0.971391	0.256537
T2A;G63A	0.00185473	0.000147085	10.4056	1.24355	92.9482	1.75395	82.5426	2.15006	1.67682	0.201611
T2A;G63C	0.00162445	0.000275069	13.4915	2.3356	95.3944	3.99062	81.9029	4.62386	1.19869	0.240469
T2A;G63T	0.000583406	9.49e-05	12.627	2.79238	97.6793	1.32207	85.0523	3.08954	1.3533	0.227525
T2A;A64C	0.00171578	0.000247121	10.7247	2.07412	85.2117	3.07426	74.487	3.70851	1.66733	0.355659
T2A;A64G	0.000778105	0.000156242	35.2968	3.05345	96.0173	2.02685	60.7205	3.66493	1.33451	0.308108
T2A;A64T	0.000958019	0.000140262	15.3475	2.74561	93.2545	2.27843	77.907	3.56786	1.8195	0.413191
T2A;G65A	3.68e-05	6.87e-06	32.0836	3.74027	95.338	0.65121	63.2544	3.79654	1.20083	0.183014
T2A;G65C	6.31e-05	8.84e-06	21.1302	4.75164	90.7139	1.47354	69.5837	4.97488	3.40757	1.13743
T2A;G65T	2.91e-05	1.14e-05	41.643	6.96577	94.2262	1.16227	52.5832	7.06207	1.18368	0.34728
T2A;G66A	2.2e-05	1.48e-05	40.1108	5.50476	96.0123	4.53933	55.9015	7.13498	0.397627	0.138838
T2A;G66C	6.64e-05	7.68e-06	27.2913	3.98283	92.5236	0.965926	65.2323	4.09829	3.6643	0.927717
T2A;G66T	1.42e-05	9.88e-06	57.631	9.86474	91.8458	1.67023	34.2148	10.0051	1.28544	0.79991
T2A;C67A	4.03e-05	2.04e-05	26.5244	8.72807	88.6691	2.71984	62.1447	9.14203	0.827952	0.282401
T2A;C67G	0.000262883	0.000156418	22.1725	7.48398	74.766	5.3518	52.5935	9.20064	1.15538	0.65342
T2A;C67T	0.000251758	0.000285145	27.372	5.2964	100	12.585	72.628	13.6541	0.365434	0.123172
T2A;T68A	1.25e-07	1.08482	69.2833	23.5592	100	45.5301	30.7167	51.2643	1.89e-07	0.226563
T2A;T68C	9.43e-05	0.000113226	52.6986	10.2466	92.3196	6.21755	39.621	11.9855	0.656198	0.476859
T2A;T68G	0.000315167	0.000129844	9.40421	5.37069	84.8565	5.30211	75.4522	7.54696	0.982249	0.316057
T2A;G69A	1.06e-05	6.56e-05	71.1842	5.09911	92.542	0.985411	21.3578	5.19346	5	183.547
T2A;G69C	1.25e-07	7.62276e+06	84.4722	7.81757	100	1.16314e+08	15.5278	1.16314e+08	2.74e-07	2.02643
T2A;G69T	3.95e-06	0.000104121	80.8102	4.79665	100	39.2446	19.1898	39.5367	0.135554	0.562836
T2A;A70C	3.24e-05	9.01e-05	77.041	5.60616	100	8.77884	22.959	10.4162	0.29423	0.319366
T2A;A70G	0.000326726	6.96e-05	25.1977	3.42718	93.6154	1.85789	68.4177	3.89837	1.24223	0.232917
T2A;A70T	0.000490073	3.24e-05	36.1962	0.984944	95.6332	0.462437	59.437	1.0881	1.32451	0.090284
T2A;A71C	0.000797246	0.00018772	36.4	3.89113	99.0626	1.71896	62.6626	4.25391	1.15466	0.260136
T2A;A71G	0.000541539	0.00018783	23.0016	5.66309	98.7046	3.69068	75.703	6.75957	0.877399	0.23543
T2A;A71T	0.00227394	0.0013959	10.7867	4.39083	100	16.55	89.2133	17.1225	0.750338	0.288761
T2A;A72C	0.000818331	8.03e-05	32.5693	1.69305	96.2393	0.832355	63.67	1.88659	1.44199	0.171248
T2A;A72G	0.000449312	8.16e-05	24.4074	2.97083	96.1456	1.58993	71.7382	3.36953	1.13619	0.184321
T2A;A72T	0.000607862	0.00013702	33.9757	3.88857	95.6768	1.92138	61.7012	4.33736	1.74732	0.554552
T2C;T3A	0.000842329	0.000216325	14.5855	2.52847	62.6841	5.39054	48.0986	5.95408	2.93403	1.45477
T2C;T3C	0.0133979	0.0288123	11.8671	3.19594	100	79.0239	88.1329	79.0885	0.899538	0.584505
T2C;T3G	0.000163722	0.000153743	41.1932	8.75356	88.8503	6.55452	47.6571	10.9356	0.730477	0.412813
T2C;C4A	0.00285035	0.022418	9.33966	4.17995	100	92.5768	90.6603	92.6712	0.272198	0.217557
T2C;C4G	8.44e-05	0.0024872	27.3725	9.04198	100	156.399	72.6275	156.66	0.147681	0.441049
T2C;C4T	0.0165986	0.234891	10.968	5.0153	100	172.279	89.032	172.352	0.262557	0.266441
T2C;A5C	0.00313117	0.00199172	14.575	2.05633	30.2007	5.14943	15.6257	5.54483	2.39419	2.76503
T2C;A5G	0.000946379	0.000108437	14.3647	1.87179	77.0756	2.55075	62.7109	3.16385	2.76893	0.657605
T2C;A5T	0.00384625	0.0103888	7.90877	2.35612	32.669	25.5986	24.7602	25.7068	0.901534	1.18953
T2C;G6A	0.000816007	0.00471837	62.5975	8.51034	100	31.4547	37.4025	32.5856	0.328286	0.389718
T2C;G6C	2.41e-07	2.40765	39.6224	10.5197	96.8111	747.609	57.1888	747.683	2.59e-06	0.0809368
T2C;G6T	8.86e-05	0.000182663	55.1567	10.3547	91.9519	11.4613	36.7952	15.446	0.465208	0.440334
T2C;C7A	6.45e-05	0.000314875	80.0186	3.84728	92.804	9.20951	12.7854	9.98082	0.337216	0.568761
T2C;C7G	0.000325714	0.000756154	51.7906	6.89336	100	16.6574	48.2094	18.0275	0.347625	0.219479
T2C;C7T	0.000528341	0.00153914	53.8575	3.94833	100	18.0301	46.1425	18.4573	0.297233	0.160214
T2C;C8A	0.000731429	0.000309398	28.3733	5.17248	87.804	5.77707	59.4307	7.75429	1.06607	0.46901
T2C;C8G	0.000543046	0.00060335	58.9964	6.32002	97.882	8.68567	38.8856	10.7417	0.574642	0.338653
T2C;C8T	0.00168091	0.000324488	18.3851	2.61792	89.7623	3.86441	71.3772	4.66767	1.40024	0.364431
T2C;G9A	0.0056441	0.00188216	6.82471	1.24229	34.9092	6.93831	28.0845	7.04865	3.16871	2.96838
T2C;G9C	2.49e-07	7.48538	4.37443	3.44981	10.3649	4380.55	5.9905	4380.55	4.86e-05	0.408895
T2C;G9T	0.0112523	0.00284534	5.86684	0.844038	30.0504	8.01129	24.1835	8.05563	5	7.38421
T2C;G10A	0.00389984	0.00126822	9.0725	1.91757	67.7419	9.43163	58.6694	9.62459	1.76269	0.707374
T2C;G10C	0.0043285	0.00123285	7.41336	1.28909	42.044	6.324	34.6306	6.45405	2.59281	1.42447
T2C;G10T	0.206773	1.27948	2.08061	0.64815	100	187.494	97.9194	187.495	0.461621	0.155972
T2C;A11C	0.135537	2.97185	10.4607	3.75428	100	769.448	89.5393	769.457	0.597971	1.02862
T2C;A11G	0.00111435	0.000154167	26.3879	2.43433	77.4974	2.79324	51.1095	3.70516	2.99112	1.38371
T2C;A11T	0.00254865	0.000741972	5.1616	1.3272	19.2211	4.15565	14.0595	4.36244	4.98933	12.7761
T2C;A12C	0.00450254	0.00218724	6.39024	1.72236	18.7801	5.10233	12.3898	5.38519	5	11.4189
T2C;A12G	0.00259246	0.00169589	5.02024	2.1301	62.403	13.6133	57.3827	13.7789	1.08108	0.50654
T2C;A12T	NA	NA	NA	NA	NA	NA	NA	NA	NA	NA
T2C;G13A	0.000945298	0.00103241	12.3567	4.49187	94.5	18.9091	82.1433	19.4353	0.547551	0.202536
T2C;G13C	0.00285188	0.00277079	8.13618	3.09097	61.0272	20.9892	52.8911	21.2155	1.13221	0.810374
T2C;G13T	0.00146957	0.000644418	12.4971	3.95471	59.1657	10.3058	46.6686	11.0385	2.45114	2.04371
T2C;C14A	NA	NA	NA	NA	NA	NA	NA	NA	NA	NA
T2C;C14G	7.49e-07	6.15314e+07	11.6072	7.72892	6.91264	2.7411e+08	-4.69454	2.7411e+08	1.42e-06	83.4172
T2C;C14T	NA	NA	NA	NA	NA	NA	NA	NA	NA	NA
T2C;G15A	0.0020572	0.00329687	6.4945	1.3378	8.83808	2.02755	2.34358	2.42913	5	24.329
T2C;G15C	0.000866652	0.000909748	19.788	3.09152	34.5419	5.09055	14.754	5.95577	1.50138	2.16235
T2C;G15T	NA	NA	NA	NA	NA	NA	NA	NA	NA	NA
T2C;G16A	NA	NA	NA	NA	NA	NA	NA	NA	NA	NA
T2C;G16C	0.000284416	12938.1	7.29167	5.38607	24.4787	10.6079	17.187	11.897	1.49e-08	0.230935
T2C;G16T	1.25e-07	11.5529	7.97102	7.69635	3.48095	22.1161	-4.49006	23.417	4.23e-08	0.966847
T2C;G17A	0.0125496	0.00314794	10.3562	0.876151	26.9687	7.53589	16.6126	7.58665	5	15.2209
T2C;G17C	3.89e-05	854.614	27.2727	11.0953	44.2038	22.0384	16.9311	24.6738	4.11e-08	0.458043
T2C;G17T	2.5	267.408	7.26112	5.10295	100	2297.67	92.7389	2297.68	0.321549	1.02509
T2C;A18C	NA	NA	NA	NA	NA	NA	NA	NA	NA	NA
T2C;A18G	0.00121366	709000000000	8.33333	6.40733	12.3219	1.39267e+08	3.98854	1.39267e+08	1.09e-07	3.57251
T2C;A18T	0.000450239	0.00171931	5.54839	3.00192	11.8301	3.50451	6.28171	4.61445	5	178.789
T2C;C19A	0.000804591	10815.3	13.6986	3.96486	20.2831	5.62197	6.58449	6.87944	6.43e-08	0.342278
T2C;C19G	0.00284541	0.00905113	10.4184	3.17038	5.59654	6.47264	-4.82189	7.20739	1.79279	8.06574
T2C;C19T	6.43e-07	33.851	4.02298	3.1107	9.76355	185.581	5.74057	185.607	1.24e-06	0.469781
T2C;G20A	0.00493934	0.00634793	14.9768	2.25717	31.3856	10.7772	16.4088	11.011	1.67048	2.48765
T2C;G20C	0.0306631	22.2059	6.31869	1.68063	41.1384	86168.2	34.8197	86168.2	5	1247.97
T2C;G20T	1.25e-07	8.88712	11.1111	7.71525	20.0687	49.5378	8.95759	50.135	8.12e-08	0.705542
T2C;A21C	NA	NA	NA	NA	NA	NA	NA	NA	NA	NA
T2C;A21G	0.00209602	0.000572004	12.0262	2.99796	78.4743	7.92616	66.4481	8.47418	1.99696	0.934339
T2C;A21T	1.04898	34.4337	10.3983	1.64956	100	1004.86	89.6017	1004.86	0.458635	0.559459
T2C;C22A	1.25e-07	3.16056	3.90625	3.90919	15.1432	16.7114	11.2369	17.1626	3.09e-08	0.296578
T2C;C22G	1.23e-06	41.7629	10.0006	5.1002	0.713465	5661.52	-9.28715	5661.52	3.59e-05	0.217032
T2C;C22T	0.0271567	2.48263	7.97221	3.70836	0	93.7681	-7.97221	93.8414	0.244645	1.64356
T2C;C23A	7.64e-05	0.000141573	11.3503	3.57384	6.49694	1.82684	-4.85333	4.01369	4.60534	17.3112
T2C;C23G	NA	NA	NA	NA	NA	NA	NA	NA	NA	NA
T2C;C23T	0.0425417	331.402	6.95061	2.2751	100	3.22954e+06	93.0494	3.22954e+06	5	3404.97
T2C;C24A	0.00727673	0.0158513	8.89127	2.18323	17.963	8.0817	9.07173	8.3714	5	26.3177
T2C;C24G	0.00120321	0.000511032	7.90737	1.75937	18.6054	3.52388	10.698	3.93867	5	24.5202
T2C;C24T	1.25e-07	3.67161	31.25	13.0344	51.2801	246.236	20.0302	246.581	6.46e-07	0.795759
T2C;G25A	2.5	737.661	0.628573	0.997874	14.6776	294.934	14.0491	294.936	0.123811	0.936231
T2C;G25C	0.0145588	0.0340326	8.91727	1.24771	22.0242	33.4215	13.1069	33.4448	5	52.4295
T2C;G25T	1.25e-07	6.1223	7.73807	4.15286	10.7216	104.003	2.98349	104.086	1.67e-06	1.75735
T2C;T26A	0.00424178	0.000653305	16.6584	1.92862	76.0304	4.82727	59.3719	5.19828	2.51809	0.8577
T2C;T26C	0.000843454	0.000181314	9.82972	2.74996	91.3432	4.07553	81.5135	4.91652	1.23573	0.307522
T2C;T26G	0.00429294	0.000397241	14.3489	1.14265	72.7505	3.0209	58.4016	3.22978	3.01968	0.734558
T2C;T27A	0.00363698	0.000448293	14.3454	1.69636	79.2565	3.73068	64.9111	4.09825	2.71753	0.775469
T2C;T27C	0.00270991	0.00127759	12.9695	4.52161	83.7495	12.5833	70.7801	13.371	1.62384	0.966376
T2C;T27G	0.0135562	0.0645231	7.66988	3.20091	53.6002	95.7391	45.9303	95.7926	0.922147	1.34828
T2C;T28A	0.00343664	0.000736516	9.52511	1.99689	80.0484	5.86805	70.5233	6.19851	1.85059	0.589819
T2C;T28C	0.0036141	0.00116185	8.72339	2.25629	51.0639	8.61453	42.3405	8.90511	2.58221	1.65656
T2C;T28G	0.00142759	0.000978522	11.4636	2.06656	21.6145	4.02586	10.1509	4.52528	5	19.8889
T2C;T29A	0.00392877	0.000657287	13.3319	1.40293	77.128	4.7528	63.7961	4.95554	1.73508	0.392982
T2C;T29C	0.000757643	0.000556201	29.2649	4.99371	100	10.4762	70.7351	11.6055	0.504969	0.155582
T2C;T29G	0.00620388	0.00559194	6.54425	2.42428	41.792	17.3882	35.2477	17.5563	1.75043	1.89268
T2C;C30A	0.00453622	0.00107381	9.80157	1.50954	61.8352	6.574	52.0337	6.74509	2.03888	0.723844
T2C;C30G	0.0180845	0.0318773	4.33028	1.21936	89.8638	68.2492	85.5335	68.26	0.910468	0.378501
T2C;C30T	0.00415282	0.000824202	14.4823	2.06455	80.8466	6.12783	66.3643	6.46627	2.25367	0.775312
T2C;C31A	0.00494396	0.00176335	5.48101	0.912363	50.2525	9.11659	44.7715	9.16213	1.74508	0.615944
T2C;C31G	0.00360003	0.000650893	9.70222	1.83645	74.6584	5.57301	64.9562	5.86779	2.56571	0.939707
T2C;C31T	0.00415047	0.00115085	10.1072	1.90473	77.2674	8.90555	67.1601	9.10697	1.94511	0.758613
T2C;C32A	0.00234528	0.000502313	8.23914	1.21402	82.2681	5.63666	74.0289	5.76592	1.05724	0.183396
T2C;C32G	0.000352415	0.000448022	20.739	6.66307	100	17.0688	79.261	18.3232	0.456985	0.201
T2C;C32T	0.00173874	0.000110545	8.99008	0.70402	85.2963	1.76148	76.3062	1.89696	1.81979	0.179811
T2C;T33A	0.00185235	0.000261639	12.7326	1.76499	84.8999	3.65777	72.1673	4.06134	1.85106	0.405166
T2C;T33C	0.00143682	0.000196589	16.8001	1.7736	79.2899	2.82178	62.4899	3.33288	1.76999	0.372359
T2C;T33G	NA	NA	NA	NA	NA	NA	NA	NA	NA	NA
T2C;C34A	0.001527	0.000171957	19.2682	1.99542	89.5382	2.24043	70.27	3.00021	1.99349	0.400174
T2C;C34G	0.00164961	0.000372659	21.5955	2.84219	89.7667	5.167	68.1712	5.89711	1.35732	0.403157
T2C;C34T	0.00172048	0.000301966	10.1874	1.86825	95.1026	4.4932	84.9152	4.86613	1.15067	0.21436
T2C;T35A	0.00209759	0.000183883	22.2666	1.59605	88.752	2.07078	66.4854	2.61448	2.37164	0.436185
T2C;T35C	0.00162273	0.000282941	19.1417	2.21597	90.2934	3.84913	71.1517	4.44143	1.2286	0.264121
T2C;T35G	0.00183253	0.000279372	26.1273	2.89866	91.3507	2.81216	65.2234	4.03862	2.07317	0.568287
T2C;T36A	0.00218039	0.0010502	7.60375	3.11233	93.2755	13.7138	85.6717	14.0626	1.00217	0.370084
T2C;T36C	0.00109733	0.000921698	1.58602	1.33529	27.581	8.04086	25.995	8.15098	1.22124	0.881163
T2C;T36G	0.000246062	0.000111063	24.6985	7.15931	93.1706	3.75366	68.4721	8.08367	0.950579	0.307452
T2C;T37A	0.00154937	0.000531762	6.5006	1.8754	70.1055	8.15694	63.6049	8.36976	1.22595	0.414377
T2C;T37C	0.00524757	0.00364136	16.0504	2.36877	59.9765	14.3937	43.9262	14.5873	1.57261	1.08678
T2C;T37G	0.00070558	0.000141832	20.421	3.09677	80.2448	3.56094	59.8238	4.71914	3.83227	1.82291
T2C;C38A	0.00507256	0.00479898	2.7027	1.63456	100	29.0373	97.2973	29.0833	0.771589	0.243158
T2C;C38G	0.00130686	0.000142268	10.5026	1.35952	70.379	3.04504	59.8764	3.33476	2.87883	0.798026
T2C;C38T	0.00266723	0.000416058	8.12338	1.28736	72.6338	4.89888	64.5105	5.06521	2.44089	0.738034
T2C;A39C	0.0033852	0.000627357	8.41008	1.70849	79.2379	5.73557	70.8279	5.98463	2.23353	0.687992
T2C;A39G	0.00354985	0.00067339	15.2095	2.55641	71.5597	7.15125	56.3501	7.59445	4.52204	2.25041
T2C;A39T	0.00163372	0.000358518	15.8055	2.88659	77.3787	4.9702	61.5732	5.74763	2.25044	0.939632
T2C;T40A	0.00247764	0.000569551	7.40899	1.92824	74.2991	7.16911	66.8901	7.4239	2.14407	0.762089
T2C;T40C	0.00176616	0.000259532	12.103	1.98761	74.0581	4.09227	61.9551	4.54943	2.8088	0.94728
T2C;T40G	0.00445161	0.00181309	9.68348	1.83607	79.1435	11.7573	69.46	11.8998	1.3198	0.447063
T2C;T41A	0.00196939	0.000445646	8.50087	1.48494	77.2434	5.40424	68.7426	5.60453	1.34372	0.312147
T2C;T41C	0.00191476	0.000320613	10.6837	1.64086	71.7613	4.67377	61.0776	4.95344	2.08779	0.589356
T2C;T41G	0.00557607	0.0026158	9.23037	2.1105	61.0828	13.2833	51.8525	13.4499	1.95807	1.22098
T2C;G42A	0.00267113	0.00115174	7.64122	1.3773	79.518	9.52236	71.8767	9.62145	0.777926	0.153203
T2C;G42C	0.00296835	0.000889536	12.9238	2.85641	86.4228	9.75498	73.499	10.1646	1.62861	0.673835
T2C;G42T	0.00124524	0.000145392	10.5879	1.10693	65.3541	2.59406	54.7662	2.82036	2.31218	0.517607
T2C;C43A	0.00618712	0.00189898	4.87196	1.19111	77.2852	11.0609	72.4133	11.1249	1.61406	0.438231
T2C;C43G	0.00705874	0.00324787	8.73313	1.33498	38.2565	7.17915	29.5234	7.30221	4.36461	4.99955
T2C;C43T	0.00270456	0.00101799	8.69441	1.72973	83.1686	10.2851	74.4742	10.4295	1.04331	0.281055
T2C;G44A	0.00826756	0.00448499	5.1747	0.827439	37.2578	11.0106	32.0832	11.0417	1.93008	0.956429
T2C;G44C	0.00211312	0.000466691	22.0148	2.03949	84.4863	4.90394	62.4715	5.31113	1.16525	0.285215
T2C;G44T	0.00323978	0.000588237	8.73339	1.75547	62.7464	6.55468	54.013	6.78569	4.02468	2.04596
T2C;C45A	0.00175349	0.00112878	4.95335	1.49002	14.9923	3.68751	10.039	3.97717	2.84261	4.35365
T2C;C45G	0.0226943	0.0372913	5.91908	1.1741	84.9995	98.2344	79.0804	98.2414	1.50345	0.881625
T2C;C45T	0.00920887	0.0250001	4.87854	2.54768	87.5152	69.7021	82.6367	69.7487	0.665064	0.388455
T2C;G46A	0.000474149	0.000368758	27.5888	5.41539	86.6985	9.67265	59.1096	11.0854	0.63686	0.250818
T2C;G46C	0.00689895	0.00243579	11.0413	1.16136	44.4534	7.45301	33.4121	7.54295	2.57466	1.50919
T2C;G46T	0.0555303	5760.27	18.768	1.99203	99.704	4.03968e+07	80.936	4.03968e+07	5	12919.2
T2C;G47A	0.00698904	0.00187709	31.6034	0.858217	55.9257	2.5912	24.3223	2.72963	5	3.61821
T2C;G47C	0.0539041	1.27032	31.5124	3.19845	100	1598.44	68.4876	1598.45	1.48454	5.88853
T2C;G47T	0.00714851	0.00758538	34.3487	2.79058	67.2587	17.8791	32.9101	18.0956	1.56235	1.51396
T2C;G48A	0.000185682	0.000921521	15.4471	3.98289	11.3666	3.76835	-4.08048	5.48305	0.86566	3.08888
T2C;G48C	1.25e-07	0.000468796	54.1765	10.3333	67.6319	3.93996	13.4554	11.0589	1.29548	1059.77
T2C;G48T	NA	NA	NA	NA	NA	NA	NA	NA	NA	NA
T2C;G49A	0.0580851	0.728833	11.9189	2.0327	100	952.792	88.0811	952.794	1.29117	2.37072
T2C;G49C	2.5	212941	2.94148	2.30559	13.5038	7936.74	10.5623	7936.74	0.0175624	11.3851
T2C;G49T	0.0001215	9073.56	4.78723	3.7516	6.55514	10.781	1.76791	11.4151	1.07e-07	1.88962
T2C;A50C	0.00369017	0.00606451	6.91328	1.73219	11.0646	4.19569	4.1513	4.53919	5	21.4875
T2C;A50G	0.00929658	0.00940245	11.0654	1.78119	78.2672	31.4725	67.2018	31.5229	1.10116	0.50272
T2C;A50T	0.0075634	0.0210158	9.84203	1.30502	13.4767	4.40327	3.63468	4.59259	5	30.9385
T2C;C51A	1.25e-07	3.15712	18.5185	7.44958	33.8588	25.3714	15.3402	26.4425	1.19e-07	0.279138
T2C;C51G	2.5	15270.6	26.4022	6.72598	37.2393	2016.89	10.8371	2016.9	0.0585614	6.76483
T2C;C51T	0.147426	2.56287	6.29368	2.80936	100	256.349	93.7063	256.364	0.266026	0.223109
T2C;G52A	1.25e-07	3.01908	8.33333	4.44186	27.6941	16.0183	19.3608	16.6227	1.48e-08	0.186344
T2C;G52C	NA	NA	NA	NA	NA	NA	NA	NA	NA	NA
T2C;G52T	NA	NA	NA	NA	NA	NA	NA	NA	NA	NA
T2C;A53C	0.00796293	0.0084253	9.24902	1.03833	31.8679	12.7061	22.6189	12.7484	1.36049	0.972533
T2C;A53G	0.00397197	0.000606146	7.55374	0.943458	55.1086	4.29394	47.5549	4.39637	2.51316	0.727233
T2C;A53T	1.25e-07	3.0575	17.7419	6.38011	2.83676	19.089	-14.9052	20.127	4.35e-08	0.217292
T2C;C54A	0.000366143	0.00874318	13.2976	3.59155	9.68316	3.1121	-3.61442	4.7523	5	386.974
T2C;C54G	0.00076625	26844.5	10.4839	4.3323	11.7325	5.60359	1.24859	7.08302	1.31e-07	1.9093
T2C;C54T	1.53e-05	0.000462721	7.89737	3.098	6.93607	1.13029	-0.961299	3.29775	5	735.015
T2C;C55A	0.0115671	210221	40.1978	7.26183	47.4712	48.8333	7.27343	49.3703	7.66e-07	0.655529
T2C;C55G	0.114092	3.6267	46.6974	4.52806	0	474.972	-46.6974	474.994	0.520018	1.44113
T2C;C55T	5.25e-07	11.3172	48.8358	12.212	69.3131	4445.27	20.4773	4445.29	2.01e-05	0.406193
T2C;C56A	0.00257459	0.00153763	46.412	2.11757	55.0927	3.38008	8.68064	3.98861	5	21.9883
T2C;C56G	0.0279249	0.200554	1.57808	1.51514	46.7754	168.076	45.1973	168.082	0.932191	1.19084
T2C;C56T	0.00679063	0.00426577	19.7616	1.75597	75.0436	15.7532	55.2821	15.8507	1.17165	0.462067
T2C;T57A	0.0176068	0.043862	10.1274	2.58296	100	115.638	89.8726	115.667	1.05831	0.782826
T2C;T57C	0.00149924	0.000443152	12.0312	2.90793	71.8264	7.36368	59.7952	7.91706	2.39045	1.24055
T2C;T57G	0.0209268	0.0662784	9.91975	2.28179	100	131.717	90.0803	131.736	0.910829	0.656907
T2C;G58A	0.00210703	0.00156364	26.7168	3.9763	72.9493	12.4522	46.2324	13.0716	1.10324	0.77492
T2C;G58C	0.00168493	0.000490365	38.5753	2.95422	80.1339	4.57426	41.5585	5.4453	1.83916	0.906619
T2C;G58T	0.00162366	0.000439797	36.3388	2.42001	83.3049	4.14688	46.9662	4.80136	1.31383	0.443379
T2C;C59A	0.00658688	0.00460227	11.8032	0.962032	28.7415	6.35563	16.9383	6.42803	1.65487	1.24703
T2C;C59G	0.050615	0.387629	6.63123	1.87777	100	414.941	93.3688	414.946	0.944034	1.0478
T2C;C59T	0.00600449	0.00420315	9.3261	1.74408	58.6195	16.3296	49.2934	16.4225	1.35545	0.679584
T2C;A60C	0.00367176	0.000886966	5.71612	1.10025	82.5205	7.3371	76.8044	7.41914	1.26645	0.241761
T2C;A60G	0.00120483	0.000381349	12.8137	2.66765	72.9811	6.67226	60.1674	7.18578	1.33909	0.525231
T2C;A60T	0.0582716	0.261722	6.43703	1.37979	100	137.168	93.563	137.175	0.554218	0.252651
T2C;G61A	0.000949338	0.000238847	7.68841	1.67444	57.5031	4.67763	49.8147	4.9683	1.7099	0.651819
T2C;G61C	0.000686406	0.000198172	16.1473	3.22407	86.1318	4.74532	69.9845	5.73696	0.967977	0.247006
T2C;G61T	0.00155542	0.000203652	11.0945	1.27099	71.9404	2.97412	60.8458	3.23432	1.86671	0.403921
T2C;A62C	0.000245907	6.49e-05	45.6548	3.18364	95.3147	1.44609	49.6599	3.49668	1.03595	0.200093
T2C;A62G	0.000648156	0.00254572	23.5293	6.35942	100	41.2751	76.4707	41.7622	0.309239	0.204747
T2C;A62T	0.00179558	0.000544775	36.6999	2.8884	94.8136	5.67278	58.1137	6.36579	0.885875	0.250569
T2C;G63A	0.0021858	0.000332388	10.0883	1.43393	84.5834	4.0533	74.4951	4.29947	1.30426	0.2287
T2C;G63C	0.00194798	0.000383808	13.2968	2.85855	87.2985	4.65587	74.0016	5.46337	1.71716	0.532969
T2C;G63T	0.00155066	0.00017241	5.77636	1.55334	86.8652	2.826	81.0888	3.22477	2.66812	0.568871
T2C;A64C	0.00224665	0.000190381	10.5336	1.23809	87.4138	2.07893	76.8802	2.41967	1.89787	0.258795
T2C;A64G	0.00082716	0.000108627	39.1197	1.95551	85.5077	1.557	46.3879	2.49965	2.10685	0.497322
T2C;A64T	0.00161324	0.000226909	9.57241	2.18202	87.0506	3.42799	77.4782	4.06353	2.12437	0.51394
T2C;G65A	0.000999383	0.000109927	3.66715	1.25163	85.9917	2.51629	82.3246	2.81039	1.83352	0.335794
T2C;G65C	0.00279647	0.000723023	2.10418	1.23904	94.6755	7.94241	92.5713	8.03848	1.04206	0.217604
T2C;G65T	0.00194079	0.000344894	5.1076	1.87882	82.6284	4.33961	77.5208	4.72887	1.78123	0.44774
T2C;G66A	0.00146437	0.000330424	1.73299	1.38287	94.0021	6.22871	92.2691	6.38037	1.11183	0.242959
T2C;G66C	0.000602161	0.000124335	9.80431	3.59219	96.2518	2.62869	86.4474	4.45128	1.33923	0.325753
T2C;G66T	0.00082099	0.000170812	11.3518	2.95666	91.8526	4.02079	80.5008	4.99085	1.32167	0.356912
T2C;C67A	0.00205241	0.000847567	19.5345	3.43197	88.5058	9.77949	68.9713	10.3642	1.19019	0.510742
T2C;C67G	0.000842053	0.000347899	11.7295	3.31884	57.8244	6.92899	46.0948	7.68282	5	4.29509
T2C;C67T	0.00200216	0.000694991	15.1603	2.98012	83.2226	8.60896	68.0623	9.11017	1.30555	0.486721
T2C;T68A	0.000729541	0.000109279	10.877	1.86614	75.4853	3.0548	64.6083	3.5797	1.9201	0.496576
T2C;T68C	0.00122756	0.000566391	8.7328	4.44873	80.7599	10.5289	72.0271	11.4302	1.24649	0.621475
T2C;T68G	0.00274066	0.00175419	3.01871	1.99796	53.9831	13.9519	50.9644	14.0942	1.3439	0.805863
T2C;G69A	0.00102604	8.73e-05	16.2178	1.45356	86.4703	1.60068	70.2525	2.16217	2.25299	0.370646
T2C;G69C	0.00114637	0.000250933	18.322	4.07047	91.0469	3.58647	72.7248	5.42508	2.03377	0.720413
T2C;G69T	0.00112904	0.000209982	24.6349	3.56656	81.1084	3.45574	56.4734	4.96613	5	6.97837
T2C;A70C	0.00145088	0.000160629	11.0956	2.12061	87.3656	2.51458	76.27	3.28939	2.58577	0.618459
T2C;A70G	0.00108252	0.000197737	12.3492	2.74728	91.6278	3.51647	79.2786	4.46241	1.42897	0.361931
T2C;A70T	0.00164412	0.00117016	12.0985	7.26577	100	20.3257	87.9015	21.5853	0.885383	0.482901
T2C;A71C	0.00132807	0.000127537	12.1272	1.31865	81.35	2.27546	69.2228	2.62994	1.60749	0.251983
T2C;A71G	0.00623409	0.00374713	11.1006	2.2013	82.9468	18.724	71.8462	18.853	1.21964	0.496349
T2C;A71T	0.00197387	0.000261033	7.39493	1.61216	78.1399	4.0697	70.7449	4.37739	2.51519	0.697705
T2C;A72C	0.00164849	0.00016865	11.9337	1.43254	89.616	2.27432	77.6823	2.68788	1.48349	0.215728
T2C;A72G	0.00145283	0.000147583	12.5195	1.88335	92.6942	1.946	80.1748	2.70812	1.84062	0.289962
T2C;A72T	0.00193023	0.000172333	16.7525	1.4049	92.214	1.94718	75.4615	2.40109	1.68794	0.236813
T2G;T3A	0.0018604	0.00101759	13.346	2.6181	100	11.6924	86.654	11.982	0.593918	0.119963
T2G;T3C	0.000359749	0.000144623	25.703	5.31107	87.7883	4.33539	62.0853	6.85588	1.22797	0.45858
T2G;T3G	0.00083862	0.000123817	20.3283	2.161	81.2173	2.72396	60.889	3.47705	2.69558	0.771513
T2G;C4A	0.0010162	0.000859294	22.3507	4.99184	69.1324	12.4237	46.7816	13.3891	0.961834	0.711349
T2G;C4G	6.32e-05	3.35e-05	47.6319	4.60307	82.7355	2.48891	35.1036	5.23287	0.872566	0.368427
T2G;C4T	0.00149934	0.00617398	26.5891	6.66559	100	46.3708	73.4109	46.8474	0.336694	0.229106
T2G;A5C	0.00148763	0.000629421	42.3329	3.86868	72.423	5.34796	30.09	6.60056	2.382	2.30083
T2G;A5G	1.25e-07	2.22428	51.3889	8.00899	60.2026	19.8992	8.81375	21.4505	2.8e-08	0.42483
T2G;A5T	0.005305	0.002324	11.7706	4.38888	79.8578	20.3465	68.0872	20.8144	3.46052	6.01004
T2G;G6A	0.00470996	0.00321903	80.4986	1.37716	90.6941	3.70582	10.1955	3.95344	2.04102	2.50242
T2G;G6C	NA	NA	NA	NA	NA	NA	NA	NA	NA	NA
T2G;G6T	0.00104459	0.000484074	61.568	2.75643	84.0622	2.4361	22.4942	3.67865	5	11.732
T2G;C7A	3.95e-05	0.000109507	33.7154	9.46619	67.4025	15.2592	33.6871	17.9569	0.416511	0.624947
T2G;C7G	0.00494053	0.0404741	63.3214	8.11587	86.8066	54.2712	23.4852	54.8747	0.598826	1.60335
T2G;C7T	0.00073016	0.000351665	51.0337	3.24299	75.192	3.12113	24.1583	4.50094	5	5.53434
T2G;C8A	8.24e-05	5.15e-05	53.5485	5.52976	90.1255	2.72462	36.5769	6.16456	0.835009	0.376515
T2G;C8G	8.29e-07	15.2009	41.0714	11.9386	84.4432	155.249	43.3718	155.708	4.2e-07	0.159668
T2G;C8T	0.000792888	0.000170705	50.7477	2.26076	90.2471	1.8075	39.4994	2.89449	1.57557	0.492294
T2G;G9A	0.00794135	0.00160462	12.9322	0.855869	69.3553	6.8935	56.423	6.94642	1.97743	0.469151
T2G;G9C	NA	NA	NA	NA	NA	NA	NA	NA	NA	NA
T2G;G9T	0.0015344	149201	6.87023	8.45782	17.5454	12.0746	10.6752	14.7421	2.31e-08	0.770218
T2G;G10A	0.00460968	0.000816396	15.8816	1.14955	74.7138	4.89086	58.8322	5.02414	1.62302	0.341932
T2G;G10C	0.00536834	0.00149871	18.7819	2.36364	49.2035	6.15405	30.4217	6.59236	5	12.069
T2G;G10T	0.0050162	0.00076793	10.3197	1.62038	46.2419	5.33888	35.9223	5.57936	5	5.67588
T2G;A11C	1.25e-07	4.30591	12.903	7.59372	24.7129	1105.78	11.8098	1105.81	5.53e-06	0.598438
T2G;A11G	0.000484201	8.44e-05	35.6843	3.97415	83.1359	2.86379	47.4515	4.89849	5	17.4702
T2G;A11T	0.0326034	0.23666	9.11772	3.75882	100	245.29	90.8823	245.318	0.674594	0.75006
T2G;A12C	0.00453052	0.00876506	5.87493	2.16706	37.0862	23.0154	31.2112	23.1172	0.959862	0.932316
T2G;A12G	0.00187304	0.000580601	13.8944	2.58741	83.5873	7.31483	69.6929	7.75896	1.05468	0.315569
T2G;A12T	0.00455724	0.00195956	8.27492	1.60392	22.0241	4.64985	13.7491	4.91871	5	11.6936
T2G;G13A	0.000215821	0.000267288	54.3409	4.16648	93.5253	7.95928	39.1845	8.98386	0.424687	0.187851
T2G;G13C	0.00294841	0.000823839	23.1915	2.15903	71.8897	5.78887	48.6982	6.17838	1.70662	0.677061
T2G;G13T	0.00169074	0.00128397	19.9343	2.78971	93.7278	12.8344	73.7935	13.1341	0.53615	0.134698
T2G;C14A	0.0863938	1.59559	65.0437	4.16288	0	332.875	-65.0437	332.901	0.463785	0.735597
T2G;C14G	0.0110417	0.0734661	58.2868	2.89351	31.0146	53.25	-27.2722	53.3286	0.595197	0.829561
T2G;C14T	0.00325524	0.00445378	27.4225	2.57406	33.9704	5.19627	6.54799	5.79888	5	20.9432
T2G;G15A	0.0452038	2.25286	11.4585	1.31764	100	9232.49	88.5415	9232.49	2.78261	24.4705
T2G;G15C	0.0130091	0.00754711	30.4361	2.02815	54.6844	20.727	24.2483	20.826	5	29.4809
T2G;G15T	0.506256	15.9882	7.79997	2.86812	100	879.043	92.2	879.048	0.431849	0.624295
T2G;G16A	5.56e-05	0.000234125	9.38049	4.05033	17.8206	6.2235	8.4401	7.42544	0.577565	1.53375
T2G;G16C	NA	NA	NA	NA	NA	NA	NA	NA	NA	NA
T2G;G16T	2.77e-05	0.000166039	16.139	3.17196	20.1048	1.52788	3.96578	3.52075	5	48.0326
T2G;G17A	0.678469	25.7909	13.2409	4.13868	100	756.741	86.7591	756.752	0.340759	0.545317
T2G;G17C	0.00297814	0.00223373	46.1872	2.42069	57.2641	4.9614	11.0769	5.52044	5	14.5263
T2G;G17T	0.0146481	0.0362996	19.8335	1.86516	45.3339	68.1142	25.5005	68.1397	5	53.6586
T2G;A18C	0.00114184	0.0012302	7.44908	2.86743	14.2715	3.74864	6.82241	4.71958	5	40.5369
T2G;A18G	NA	NA	NA	NA	NA	NA	NA	NA	NA	NA
T2G;A18T	0.000206748	0.00167412	17.148	6.5828	0	18.8642	-17.148	19.9798	0.315369	0.721576
T2G;C19A	NA	NA	NA	NA	NA	NA	NA	NA	NA	NA
T2G;C19G	2.5	315.819	31.9813	2.3738	10.1095	640.732	-21.8718	640.736	0.327197	1.39326
T2G;C19T	1.25e-07	2.32191	15.625	7.04722	36.7394	23.0193	21.1144	24.0739	4.47e-08	0.225071
T2G;G20A	2.5	783.78	37.3751	6.84318	70.1998	834.673	32.8246	834.701	0.139476	1.21707
T2G;G20C	0.0451211	8.42704	15.5083	1.96499	100	40627	84.4917	40627	3.2417	91.373
T2G;G20T	0.00408618	0.0254958	38.8177	1.66647	39.6527	3.36698	0.834978	3.75681	5	120.267
T2G;A21C	0.0494864	0.364055	7.5224	1.44452	52.6733	102.493	45.1509	102.503	0.539108	0.435566
T2G;A21G	0.00189478	0.000329695	32.2308	3.44227	83.1595	3.18283	50.9288	4.68824	4.05021	2.0422
T2G;A21T	0.010083	0.00180731	15.39	0.828191	41.2737	3.67648	25.8837	3.76861	3.79622	1.84706
T2G;C22A	0.0158458	0.148331	31.166	2.80164	51.9313	214.26	20.7653	214.278	5	140.941
T2G;C22G	0.0331933	167.913	12.842	2.56267	0	242667	-12.842	242667	5	6413.96
T2G;C22T	0.0149496	0.234085	23.3738	2.76996	29.0015	94.8428	5.62771	94.8832	5	306.683
T2G;C23A	NA	NA	NA	NA	NA	NA	NA	NA	NA	NA
T2G;C23G	NA	NA	NA	NA	NA	NA	NA	NA	NA	NA
T2G;C23T	NA	NA	NA	NA	NA	NA	NA	NA	NA	NA
T2G;C24A	NA	NA	NA	NA	NA	NA	NA	NA	NA	NA
T2G;C24G	1.25e-07	1.57791	44.086	5.57707	57.943	14.1061	13.8569	15.1686	1.98e-08	0.191124
T2G;C24T	0.0344033	0.312437	56.0273	2.94102	100	247.678	43.9727	247.695	1.10942	2.32919
T2G;G25A	0.00226693	0.00115631	13.1969	2.19256	24.8477	3.92156	11.6508	4.49287	5	11.9024
T2G;G25C	NA	NA	NA	NA	NA	NA	NA	NA	NA	NA
T2G;G25T	2.5	182.072	15.0248	5.54451	100	1032.97	84.9752	1032.99	0.249301	0.562819
T2G;T26A	0.00298713	0.000497019	28.5059	2.74167	78.4017	3.70914	49.8958	4.61243	4.07934	2.20236
T2G;T26C	0.000902965	0.000177965	31.746	3.11276	88.8171	2.44743	57.071	3.9597	1.74198	0.53224
T2G;T26G	0.0051901	0.00173954	33.1015	2.291	85.7217	8.39954	52.6202	8.70638	1.44713	0.572529
T2G;T27A	0.00264951	0.000871738	17.4402	3.96677	87.0524	8.45937	69.6122	9.34324	1.45306	0.686787
T2G;T27C	0.00115382	0.00020296	31.6177	3.80276	83.039	2.94082	51.4213	4.80723	5	7.42149
T2G;T27G	0.0033552	0.00164468	12.2187	2.44133	43.8914	8.11427	31.6727	8.47358	2.00753	1.61522
T2G;T28A	0.00334352	0.00112716	19.722	2.88736	85.3465	8.7892	65.6245	9.25132	1.33173	0.507331
T2G;T28C	0.00324389	0.000487442	25.0355	1.6174	63.2428	3.02032	38.2074	3.42612	5	2.31838
T2G;T28G	0.00256444	0.0041061	48.5146	2.91513	52.9887	4.85968	4.4741	5.66697	4.74024	54.3563
T2G;T29A	0.00377131	0.00114204	12.9492	2.1087	81.4156	8.74935	68.4664	8.99987	1.31714	0.418138
T2G;T29C	0.00274325	0.00153677	35.5106	4.50089	100	12.3779	64.4894	13.1708	0.891123	0.41543
T2G;T29G	0.00425709	0.000555959	9.8769	1.1829	44.9656	3.28136	35.0887	3.48806	5	2.36346
T2G;C30A	0.00380683	0.000620252	12.4435	1.86392	76.2445	4.76133	63.801	5.11317	2.30722	0.720672
T2G;C30G	0.00387339	0.00137702	12.2462	1.73676	80.3313	9.44831	68.0851	9.60661	1.11162	0.301026
T2G;C30T	0.00285671	0.000516028	13.6212	2.32469	88.5457	5.07988	74.9245	5.58654	1.62784	0.429841
T2G;C31A	0.0028637	0.000378711	10.2145	1.56198	70.1763	3.88094	59.9617	4.18347	3.14481	0.930269
T2G;C31G	0.00256786	0.00029464	13.5218	1.85721	81.9547	3.08063	68.4329	3.59716	2.79821	0.704155
T2G;C31T	0.00184353	0.000382906	9.71428	2.5661	78.9822	4.78736	69.2679	5.43173	1.8486	0.56486
T2G;C32A	0.00120394	8.94e-05	20.3063	1.6346	84.0527	1.66827	63.7464	2.3356	3.32971	0.926007
T2G;C32G	0.000817029	0.00021983	29.0667	2.88309	83.9531	3.90307	54.8864	4.85244	1.14332	0.335099
T2G;C32T	0.00132188	0.00026552	13.922	2.58421	90.321	4.3394	76.399	5.0506	1.43461	0.380568
T2G;T33A	0.00158576	0.00025649	27.9911	2.47653	90.4223	2.76543	62.4312	3.71225	1.51091	0.360771
T2G;T33C	0.00376465	0.00145464	26.4317	1.89517	79.5625	8.2977	53.1309	8.51137	1.10169	0.350004
T2G;T33G	0.0015512	0.00148589	55.6535	2.80895	64.0421	4.11587	8.38852	4.98303	4.70795	14.9634
T2G;C34A	0.00144159	0.000227431	24.5448	2.81118	94.0863	2.32361	69.5415	3.64718	1.53758	0.32794
T2G;C34G	0.00149744	0.000175703	31.6021	1.91732	86.6231	1.87101	55.0209	2.67895	1.89041	0.373897
T2G;C34T	0.00140368	0.000126043	18.9579	1.46297	90.3242	1.54885	71.3663	2.13055	1.74019	0.228883
T2G;T35A	0.00186015	0.000337482	20.3821	3.29969	91.3695	3.65438	70.9874	4.92366	1.93934	0.582895
T2G;T35C	0.00268866	0.000451464	20.5402	2.01092	78.298	4.07091	57.7578	4.5405	1.89721	0.536036
T2G;T35G	0.0118466	0.0178444	29.2333	2.81362	100	44.7065	70.7667	44.7949	0.931387	0.529109
T2G;T36A	0.00191092	0.000285867	19.0935	2.85157	87.495	3.46468	68.4015	4.48726	2.55781	0.792813
T2G;T36C	0.00140265	0.000704853	8.72632	1.84144	28.0142	4.32627	19.2879	4.70187	2.06504	1.95439
T2G;T36G	0.0013735	6.39e-05	25.4018	0.801052	81.3738	0.96758	55.972	1.25614	2.83889	0.348398
T2G;T37A	0.00154677	0.000264507	16.1368	2.42534	88.0901	3.76612	71.9533	4.4795	1.58874	0.39094
T2G;T37C	0.00232853	0.00137602	52.8633	2.96116	77.9196	5.76352	25.0563	6.47971	1.53511	1.27682
T2G;T37G	0.002789	0.00111498	21.9091	3.81139	77.2006	8.27062	55.2915	9.10658	1.63204	0.936135
T2G;C38A	0.00157026	0.000319044	17.2018	2.59708	78.5706	4.25073	61.3688	4.98132	2.0912	0.723717
T2G;C38G	0.00136006	0.000179539	19.955	1.91061	80.2826	2.34159	60.3276	3.02217	2.13512	0.501528
T2G;C38T	0.00146215	0.000404192	12.7459	2.48796	82.9749	6.16994	70.2289	6.65268	1.14812	0.330047
T2G;A39C	0.0020909	0.000406436	26.0664	2.85782	84.1631	4.48257	58.0967	5.31607	2.0441	0.691085
T2G;A39G	0.00221753	0.000388897	27.0735	1.99882	79.1667	3.46519	52.0932	4.00035	1.7353	0.479243
T2G;A39T	0.00306161	0.00107356	18.6974	2.83709	83.176	8.69594	64.4786	9.14704	1.26931	0.474342
T2G;T40A	0.00211263	0.000384479	16.4185	2.72537	79.7845	4.5594	63.366	5.31185	2.47498	0.907478
T2G;T40C	0.00143518	0.000294826	17.9761	2.59238	77.4626	4.42258	59.4864	5.12637	1.96731	0.687838
T2G;T40G	0.00247653	0.000335621	21.415	2.19215	79.3369	3.33747	57.9218	3.99302	2.81469	0.910255
T2G;T41A	0.0027347	0.000982814	21.1601	3.41791	85.2764	8.57366	64.1163	9.22983	1.33511	0.552257
T2G;T41C	0.00121558	0.000423927	22.1917	3.61829	74.7621	6.17658	52.5705	7.15836	1.50701	0.78413
T2G;T41G	0.00340074	0.000757736	18.3844	1.50928	69.7159	4.89964	51.3315	5.12683	1.50942	0.417179
T2G;G42A	0.00263626	0.000624123	15.7368	1.88472	87.4832	5.87656	71.7464	6.1714	1.14503	0.260594
T2G;G42C	0.00203651	0.000494678	18.1124	2.15761	85.4232	5.69581	67.3108	6.09077	1.06536	0.258711
T2G;G42T	0.00124063	0.000472621	13.8523	4.13315	84.3224	8.14888	70.4701	9.13713	1.22227	0.536122
T2G;C43A	0.00428564	0.00067432	14.8396	1.84258	66.1586	4.45774	51.319	4.82354	2.9088	1.25117
T2G;C43G	0.00933639	0.0206553	9.83743	2.76885	67.6365	50.917	57.7991	50.9922	0.913578	0.724364
T2G;C43T	0.00194416	0.0002942	17.1514	1.93331	84.6686	3.56887	67.5172	4.05888	1.55053	0.321422
T2G;G44A	0.0126943	0.0141195	10.4234	0.95382	53.3584	24.0346	42.9351	24.0535	1.13369	0.51089
T2G;G44C	0.00297822	0.000734445	46.2105	2.29887	79.194	3.44259	32.9835	4.13959	2.09609	1.02469
T2G;G44T	0.00495151	0.00134545	18.5166	1.21469	74.9916	6.79372	56.475	6.90146	1.24219	0.28172
T2G;C45A	0.0131792	0.0366141	16.9698	2.06563	23.2873	24.1169	6.31751	24.2052	5	125.009
T2G;C45G	0.0887778	2.33437	14.1009	3.52718	100	1448.94	85.8991	1448.95	0.942116	2.56663
T2G;C45T	0.00849453	0.00823912	23.2749	2.48604	91.0414	29.2596	67.7665	29.365	1.08416	0.534825
T2G;G46A	4.38e-05	1.73e-05	32.4768	4.34479	89.1189	2.62814	56.6421	5.07782	0.660001	0.169608
T2G;G46C	NA	NA	NA	NA	NA	NA	NA	NA	NA	NA
T2G;G46T	0.0103878	0.0292662	55.3035	4.24355	78.9014	41.2044	23.5978	41.4223	1.63997	4.04867
T2G;G47A	0.00023919	0.00118199	61.2065	3.58134	53.4756	3.10526	-7.73093	4.74011	5	36.38
T2G;G47C	2.36e-05	3.67e-05	79.7928	3.35601	73.1869	1.44535	-6.60589	3.65402	3.29784	7.01724
T2G;G47T	NA	NA	NA	NA	NA	NA	NA	NA	NA	NA
T2G;G48A	0.00501614	0.00423985	48.5751	2.87472	41.2577	5.97507	-7.31748	6.63064	5	55.0528
T2G;G48C	1.25e-07	0.975566	84.5361	6.69028	77.7325	11.8838	-6.80363	13.6376	3.23e-08	0.229574
T2G;G48T	0.00439521	0.00330569	76.0727	2.13429	66.8325	4.92068	-9.24015	5.3636	5	19.5402
T2G;G49A	1.25e-07	1.82198	11.6667	4.76389	39.4587	170.935	27.792	171.001	8.7e-07	0.142051
T2G;G49C	0.0337476	19.3674	17.568	0.993441	78.7939	133423	61.2259	133423	5	680.433
T2G;G49T	NA	NA	NA	NA	NA	NA	NA	NA	NA	NA
T2G;A50C	0.0372395	1.15259	34.4456	3.44132	100	3024.84	65.5544	3024.84	2.33573	20.5066
T2G;A50G	0.0422376	0.497102	21.4014	4.08975	100	532.286	78.5986	532.301	0.981847	1.98579
T2G;A50T	0.00107388	0.0016571	12.4803	2.42123	18.1337	2.84907	5.65338	3.73893	5	39.1763
T2G;C51A	1.25e-07	3.09069	23.1707	7.35519	39.0316	23.6032	15.8609	24.7227	4.86e-08	0.340992
T2G;C51G	1.25e-07	3.39e-05	25.6016	7.4798	32.4225	5.59661	6.82095	9.34181	0.604903	35.4401
T2G;C51T	NA	NA	NA	NA	NA	NA	NA	NA	NA	NA
T2G;G52A	0.0538829	0.644664	26.5237	4.44514	100	274.649	73.4763	274.685	0.544519	0.744462
T2G;G52C	0.0495881	0.581538	22.4548	3.9588	100	440.621	77.5452	440.639	0.819772	1.41045
T2G;G52T	NA	NA	NA	NA	NA	NA	NA	NA	NA	NA
T2G;A53C	0.00383778	0.0012138	9.7943	1.028	22.9854	2.8248	13.1911	3.00604	5	4.26453
T2G;A53G	0.00358152	0.000588267	13.866	1.94846	67.3718	5.0063	53.5059	5.37211	3.05669	1.1876
T2G;A53T	0.000858045	26764.7	6.94444	2.66111	12.8159	3.71659	5.87149	4.57106	1.51e-08	0.269127
T2G;C54A	0.000857292	0.00128441	20.1546	2.50702	27.0207	2.93454	6.86609	3.85962	5	16.993
T2G;C54G	4.49e-07	18.7603	6.94441	3.03739	7.87004	85.5325	0.925626	85.5864	4.43e-06	2.27677
T2G;C54T	NA	NA	NA	NA	NA	NA	NA	NA	NA	NA
T2G;C55A	0.0296069	0.362018	52.1887	4.64095	100	400.94	47.8113	400.966	1.27309	4.1913
T2G;C55G	NA	NA	NA	NA	NA	NA	NA	NA	NA	NA
T2G;C55T	0.0137392	0.0214374	19.2358	1.69617	100	35.3389	80.7642	35.3795	0.56555	0.166983
T2G;C56A	0.0652891	0.418001	18.3887	1.51726	100	266.998	81.6113	267.002	0.819626	0.646608
T2G;C56G	0.0372183	0.168955	11.556	1.27861	100	419.908	88.444	419.91	1.72949	2.07126
T2G;C56T	5.98e-07	14.0176	12.4993	13.0201	29.5728	2105.11	17.0735	2105.15	1.05e-05	0.483027
T2G;T57A	0.026375	0.0434587	9.32844	1.06342	100	68.2926	90.6716	68.3009	0.857701	0.284821
T2G;T57C	0.00115332	0.00016474	14.1244	2.11757	88.373	2.67588	74.2486	3.4124	1.82441	0.401753
T2G;T57G	0.0284403	0.125873	9.01274	2.44873	100	160.832	90.9873	160.85	0.740788	0.559352
T2G;G58A	0.00136844	0.000124046	29.8564	1.10489	77.0989	1.31465	47.2425	1.71729	1.87798	0.290563
T2G;G58C	0.0060869	0.00816627	33.9092	3.85598	100	30.0642	66.0908	30.3105	0.77461	0.453241
T2G;G58T	0.00732056	0.00779014	21.8256	2.74673	100	28.9495	78.1744	29.0795	0.802706	0.329697
T2G;C59A	0.00280171	0.000441554	43.934	2.31458	87.6362	2.49778	43.7022	3.40532	2.50093	0.797502
T2G;C59G	0.00100694	0.00017741	30.3971	2.85043	78.3721	2.16169	47.975	3.57741	4.12461	2.67279
T2G;C59T	0.00310056	0.00266298	32.488	3.15031	100	15.3873	67.512	15.7065	0.584695	0.188008
T2G;A60C	4.15e-07	10.5555	38.7073	13.9444	55.5097	5981.81	16.8024	5981.82	2.79e-05	0.503551
T2G;A60G	0.00173071	0.000439499	10.6738	2.80161	76.9736	6.37539	66.2999	6.9638	2.03677	0.919173
T2G;A60T	0.00469798	0.00154122	11.3076	2.03954	54.0585	7.29624	42.7509	7.57594	2.25984	1.30947
T2G;G61A	0.00103961	0.000395738	17.2019	3.94573	83.2114	7.35385	66.0094	8.34553	1.03198	0.394701
T2G;G61C	0.00176243	0.00021053	17.1085	1.06176	86.3543	2.81105	69.2458	3.00488	0.988764	0.113442
T2G;G61T	0.00154003	0.000708923	17.3941	4.52866	93.6041	10.9311	76.21	11.8321	0.888395	0.346342
T2G;A62C	0.000503129	0.000126429	28.5732	3.88444	96.9859	2.53471	68.4127	4.63828	0.937682	0.198601
T2G;A62G	0.00290276	0.000544647	41.5343	2.03874	79.3043	3.14921	37.77	3.75153	2.7173	1.20293
T2G;A62T	0.00331882	0.00117514	22.0413	3.20744	71.698	7.50961	49.6567	8.1659	1.88732	1.04302
T2G;G63A	0.00351603	0.00040788	9.68774	1.0671	81.0843	3.37913	71.3966	3.54362	1.73808	0.285718
T2G;G63C	0.00286178	0.000329185	7.67117	1.59966	84.5687	3.09206	76.8975	3.48134	2.20234	0.430441
T2G;G63T	0.0020116	0.000154701	6.87478	0.991282	84.4069	1.92643	77.5321	2.16652	2.07663	0.270978
T2G;A64C	0.00264686	0.000425263	10.63	2.09584	83.3863	4.12605	72.7563	4.62783	1.96292	0.503234
T2G;A64G	0.000865353	0.000166341	34.1844	2.99226	89.0949	2.26944	54.9105	3.75553	1.72467	0.492599
T2G;A64T	0.00157428	0.000196461	8.10183	1.52687	90.4322	2.9809	82.3304	3.34919	1.38524	0.22867
T2G;G65A	0.000334554	6.3e-05	10.4214	3.16981	95.1469	1.68411	84.7255	3.58942	1.29977	0.214359
T2G;G65C	0.000812608	6.38e-05	10.9551	1.67744	90.9824	1.39186	80.0272	2.1797	2.71829	0.416728
T2G;G65T	0.000358948	9.31e-05	13.3927	4.09615	93.8517	2.18365	80.459	4.64185	1.68591	0.471001
T2G;G66A	0.000125271	2.9e-05	20.2406	4.4896	94.7904	1.63346	74.5499	4.77752	1.20228	0.251854
T2G;G66C	0.000169989	2.64e-05	10.3389	2.84284	91.398	1.43444	81.0591	3.18423	1.14042	0.14656
T2G;G66T	4.74e-05	5.93e-06	46.8506	1.70421	93.1744	0.468704	46.3238	1.76749	0.970381	0.0896795
T2G;C67A	0.00047148	0.000619236	68.0583	4.95929	97.8721	7.36375	29.8138	8.87803	0.506235	0.312862
T2G;C67G	0.000423777	0.000296732	35.0351	7.2222	91.6265	7.80221	56.5914	10.6318	0.779495	0.374282
T2G;C67T	0.000739734	0.00133407	69.9035	4.1565	100	10.0075	30.0965	10.8364	0.432467	0.256326
T2G;T68A	4.26e-05	4.07e-05	63.226	4.9972	97.1603	4.06255	33.9343	6.44021	0.440388	0.216191
T2G;T68C	0.000211803	0.000185953	47.1098	7.21675	97.9088	6.83892	50.799	9.94245	0.530818	0.230098
T2G;T68G	0.000783797	0.000388862	13.5596	3.72389	94.1017	9.45305	80.5421	10.1601	0.711189	0.200193
T2G;G69A	0.000118681	0.00179544	81.48	3.20189	99.6611	24.9121	18.1812	25.1171	0.186813	0.376346
T2G;G69C	0.000459646	0.000619657	78.614	4.61042	100	5.22397	21.386	6.96749	0.522898	0.373405
T2G;G69T	0.00379004	0.0259342	86.3341	3.22001	100	17.8138	13.6659	18.1025	0.395648	0.563507
T2G;A70C	0.000279179	7.53e-05	23.7627	3.93779	91.2604	2.28745	67.4978	4.55396	1.01886	0.204876
T2G;A70G	0.000742869	0.00010818	29.1034	2.65502	91.6611	1.84242	62.5577	3.23166	1.82341	0.426065
T2G;A70T	0.000627394	0.00019534	42.0125	3.85111	95.408	3.02689	53.3955	4.89827	0.958131	0.271806
T2G;A71C	0.00567588	0.00220319	9.91795	1.55507	36.3794	5.22937	26.4615	5.45569	5	12.725
T2G;A71G	0.000771463	0.000187262	17.7534	4.16299	94.4454	3.57758	76.692	5.48904	1.61878	0.547545
T2G;A71T	0.00290553	0.00052441	8.04802	1.74543	72.214	4.75922	64.1659	5.06919	1.97655	0.568116
T2G;A72C	0.00215622	0.000400163	13.9467	2.51825	83.1596	4.5295	69.2129	5.18247	1.75301	0.52584
T2G;A72G	0.000848596	0.000133678	20.2681	2.75482	96.2007	2.29102	75.9327	3.58299	1.19423	0.215172
T2G;A72T	0.00150246	0.000256577	20.2917	2.92942	85.5003	3.25795	65.2085	4.38129	1.88227	0.566042
T3A;C4A	0.0121617	0.0835295	11.8931	3.1168	100	102.474	88.1069	102.521	0.330869	0.205455
T3A;C4G	0.000838975	0.00064878	26.354	4.13679	46.2127	5.00569	19.8587	6.49384	5	8.41444
T3A;C4T	0.000786644	0.00408099	4.25939	2.26686	66.3035	43.8609	62.0441	43.9194	0.308521	0.223811
T3A;A5C	0.00385463	0.0111186	12.679	5.3732	100	53.8362	87.321	54.1037	0.47239	0.276509
T3A;A5G	0.00028036	0.000169289	13.3084	3.74599	71.5844	7.36884	58.2759	8.26633	0.685087	0.206914
T3A;A5T	0.000564503	0.000528102	6.33361	2.46647	31.3622	7.21416	25.0286	7.62414	5	35.4724
T3A;G6A	1.25e-07	0.520435	69.4009	8.09688	100	15.6868	30.5991	17.6532	5.96e-08	0.0957365
T3A;G6C	8.46e-06	1.91e-05	64.6619	3.22459	91.515	9.03499	26.8531	9.59317	0.249643	0.247188
T3A;G6T	2.56e-05	2.51e-05	58.7262	8.25859	90.4468	2.55879	31.7205	8.6459	0.841293	0.575078
T3A;C7A	0.00504736	0.562534	65.3785	6.00096	100	225.054	34.6215	225.134	0.117588	0.624242
T3A;C7G	1.09e-05	2.35e-05	73.6052	5.25188	92.4114	5.57201	18.8062	7.65699	0.402315	0.57182
T3A;C7T	9.97e-05	0.00169193	53.8134	7.47524	100	70.5758	46.1866	70.9706	0.184505	0.417841
T3A;C8A	7.04e-05	4.13e-05	25.8417	6.46881	97.6418	5.15019	71.8001	8.26861	0.492039	0.14842
T3A;C8G	NA	NA	NA	NA	NA	NA	NA	NA	NA	NA
T3A;C8T	0.000179337	0.000180733	45.2784	8.1267	95.1407	7.45161	49.8623	11.0259	0.51996	0.248875
T3A;G9A	0.00331858	0.000445611	5.07388	0.568626	48.3245	3.13934	43.2506	3.19042	2.57908	0.535274
T3A;G9C	2.5	149.473	1.89893	1.52312	78.0069	1377.28	76.108	1377.29	0.388983	0.59737
T3A;G9T	0.00168676	0.000603216	3.81346	0.603966	11.4646	1.63125	7.6511	1.73947	5	5.30092
T3A;G10A	0.00231213	0.000916225	8.58806	2.02114	87.5278	10.9213	78.9397	11.1067	0.987284	0.276409
T3A;G10C	0.00554792	0.00100692	8.58533	0.931617	38.8142	4.05609	30.2288	4.16171	3.67603	2.47422
T3A;G10T	0.00365516	0.0010058	5.68906	1.00322	37.7307	5.03686	32.0416	5.1358	2.17958	0.934995
T3A;A11C	0.00411974	0.00156523	13.7613	2.18571	54.5864	7.81733	40.825	8.11714	2.14572	1.30345
T3A;A11G	0.000322366	0.000323916	11.2314	4.53532	85.8865	13.7134	74.6551	14.4439	0.502577	0.186053
T3A;A11T	0.00363961	0.00229639	2.28944	0.961462	26.711	8.46545	24.4215	8.51987	1.7687	1.24288
T3A;A12C	0.00260587	0.000698488	8.11522	1.24359	22.0245	3.51893	13.9093	3.73221	5	10.9306
T3A;A12G	0.00173684	0.00102213	7.74392	2.97566	60.3892	12.2732	52.6452	12.6287	1.30434	0.840452
T3A;A12T	0.00435753	0.00340569	3.82861	0.803364	11.329	3.90819	7.50037	3.98991	2.34468	3.15028
T3A;G13A	1.06e-05	8.07e-05	12.7268	3.33124	52.7366	2.37844	40.0098	4.09318	5	232.816
T3A;G13C	0.000241765	0.000265897	1.10123	4.62599	38.5648	10.7512	37.4635	11.7042	1.0722	0.948714
T3A;G13T	0.0031712	0.010532	5.7768	2.25428	75.7771	43.2	70.0003	43.2588	0.408079	0.198693
T3A;C14A	0.000106825	0.000130036	25.8367	5.63326	13.1907	2.37464	-12.6461	6.11331	5	33.4824
T3A;C14G	0.00110141	0.00428497	12.1116	3.78528	15.2356	4.27999	3.124	5.71373	5	117.46
T3A;C14T	6.12e-06	203.688	1.11111	1.96788	20.6747	42.5077	19.5636	42.5532	1.31e-07	0.152339
T3A;G15A	1.25e-07	11.3894	3.33333	4.51928	1.82428	9.85467	-1.50906	10.8415	1.58e-08	1.29558
T3A;G15C	1.25e-07	5.50726	1.78571	2.80193	26.3239	84.2402	24.5382	84.2868	1.46e-07	0.18057
T3A;G15T	0.000279085	0.00106857	7.68388	1.70798	10.4278	1.5109	2.74396	2.28035	3.77693	21.7699
T3A;G16A	2.5	457.884	0.650091	0.94211	14.527	297.727	13.8769	297.729	0.187137	0.964585
T3A;G16C	NA	NA	NA	NA	NA	NA	NA	NA	NA	NA
T3A;G16T	0.000126617	6023.49	3.73134	3.49037	6.87858	6.44495	3.14724	7.3294	3.98e-08	1.02304
T3A;G17A	NA	NA	NA	NA	NA	NA	NA	NA	NA	NA
T3A;G17C	1.25e-07	1.62641	18.0851	6.3264	46.264	25.9078	28.1789	26.6691	6e-08	0.164668
T3A;G17T	2.5	282.444	1.02789	1.54562	41.4233	575.433	40.3954	575.435	0.199174	0.655309
T3A;A18C	0.00457356	0.00168644	6.6573	0.878095	31.0964	4.89319	24.4391	4.97135	1.8331	0.847281
T3A;A18G	0.00490324	0.00226189	16.9304	1.92645	27.7797	4.38425	10.8494	4.78883	5	23.3104
T3A;A18T	NA	NA	NA	NA	NA	NA	NA	NA	NA	NA
T3A;C19A	0.000778377	0.000716393	22.8565	2.48338	33.9784	2.6368	11.1219	3.62214	5	9.8677
T3A;C19G	0.0135049	474676	2.31568	2.04196	16.2195	6.03667	13.9038	6.37267	4.04e-09	0.117737
T3A;C19T	0.000161891	13257.3	4.16667	3.52134	0.680591	17.0546	-3.48608	17.4144	1.18e-07	0.601898
T3A;G20A	1.25e-07	1.05309	20.5882	6.85629	65.379	22.0171	44.7907	23.0599	2.92e-08	0.105773
T3A;G20C	0.0204226	0.576961	10.3947	1.00753	28.3985	856.233	18.0038	856.234	5	182.981
T3A;G20T	0.0001654	1695.11	30.6122	6.85242	60.2815	9.69331	29.6692	11.8708	2.54e-08	0.12556
T3A;A21C	2.5	1088.46	6.42767	3.55101	26.8848	609.242	20.4571	609.252	0.120332	1.36862
T3A;A21G	0.000163599	9.64e-05	9.45302	3.84547	89.6942	8.17584	80.2412	9.03504	0.57108	0.157445
T3A;A21T	0.0166845	0.0274611	12.748	1.33413	74.9293	44.1983	62.1813	44.2184	0.878789	0.376017
T3A;C22A	0.00263919	0.000901464	11.907	1.86366	29.8699	4.63138	17.9629	4.99229	5	10.7412
T3A;C22G	7.46e-07	134.461	5.55603	4.44422	2.38837	6444.51	-3.16766	6444.51	2.26e-05	0.62107
T3A;C22T	NA	NA	NA	NA	NA	NA	NA	NA	NA	NA
T3A;C23A	2.5	459.954	3.04263	2.32566	61.7903	4261.89	58.7477	4261.89	0.486511	2.24681
T3A;C23G	0.0296951	2.37692	19.3639	5.08036	0	2228.49	-19.3639	2228.5	2.54812	87.6727
T3A;C23T	0.00167269	0.0015279	5.01256	1.46873	20.9032	5.08427	15.8906	5.29216	1.01368	0.747015
T3A;C24A	1.1e-05	0.000496751	8.03483	5.57747	14.2688	2.62238	6.23395	6.1632	5	1784.55
T3A;C24G	1.25e-07	1.36283	39.6226	7.80601	47.4319	24.1185	7.80927	25.3503	9.74e-08	0.63743
T3A;C24T	0.00201353	0.00278936	38.3233	4.12702	67.6082	13.395	29.2849	14.0163	0.830986	0.781154
T3A;G25A	1.25e-07	14.6008	1.72414	1.53414	5.64979	5.05694	3.92565	5.28453	4.77e-09	0.221485
T3A;G25C	1.25e-07	16.9597	6.25	8.26975	12.1537	21.7855	5.90366	23.3023	1.52e-08	0.802241
T3A;G25T	0.0590423	0.476275	5.06591	1.60232	100	517.975	94.9341	517.977	1.04059	1.10446
T3A;T26A	0.000709411	0.000164039	39.8758	3.21265	93.8841	2.26395	54.0083	3.93022	1.2851	0.339881
T3A;T26C	0.00052547	0.00012953	42.2763	3.88009	94.3784	1.6805	52.1022	4.22838	2.0301	0.747504
T3A;T26G	0.00114273	0.000236689	57.6356	3.11717	93.5568	1.79277	35.9212	3.59594	2.59317	1.2979
T3A;T27A	0.000878524	9.28e-05	34.3033	1.65961	95.8556	1.11924	61.5523	2.00175	1.196	0.141396
T3A;T27C	0.000283504	8.64e-05	59.74	2.94733	93.8455	1.09512	34.1055	3.14421	1.69528	0.543979
T3A;T27G	0.00286031	0.000267252	22.159	1.65655	83.7126	2.21812	61.5537	2.76843	2.71872	0.556286
T3A;T28A	0.00137184	0.000115209	34.1317	1.51983	96.0458	1.05651	61.9141	1.85098	1.51813	0.175753
T3A;T28C	0.000970073	0.00016166	28.0469	3.1612	91.5491	2.19937	63.5022	3.85102	2.00822	0.615424
T3A;T28G	0.00277724	0.000334117	55.457	0.83222	89.4955	1.63817	34.0385	1.83744	1.37249	0.225067
T3A;T29A	0.00136195	0.000171581	25.1422	2.23161	87.4837	2.17144	62.3415	3.11372	2.01571	0.468868
T3A;T29C	0.000462505	0.00143417	74.7661	5.13952	99.1623	12.3186	24.3962	13.3477	0.370028	0.332277
T3A;T29G	0.00218434	0.000348857	14.1114	1.79377	79.8984	3.78268	65.7869	4.18644	1.57706	0.350154
T3A;C30A	0.00212215	0.000417359	7.43901	1.47617	68.7972	5.75296	61.3582	5.93933	2.10299	0.662007
T3A;C30G	0.00323585	0.00106769	4.71484	1.07787	48.3578	6.91994	43.6429	7.00338	1.63046	0.580977
T3A;C30T	0.00133669	0.000293111	16.8681	2.7573	87.0994	5.06095	70.2313	5.76333	1.41155	0.410996
T3A;C31A	0.00859944	0.0091888	5.09305	1.22549	64.3255	31.0454	59.2324	31.0695	1.23452	0.59682
T3A;C31G	0.00138046	0.000545736	8.88177	2.76766	81.6799	9.1586	72.7981	9.56765	1.08793	0.382613
T3A;C31T	0.00118005	0.000197457	9.23196	2.18668	60.8922	5.62639	51.6602	6.03637	3.89513	3.03885
T3A;C32A	0.000298225	0.000102499	15.6154	5.08286	93.2166	3.56683	77.6012	6.20949	1.06029	0.279861
T3A;C32G	0.00112101	0.0045616	10.1491	9.3055	100	61.9404	89.8509	62.6355	0.394812	0.321302
T3A;C32T	0.000868866	0.000202357	18.3354	2.5527	92.2835	4.71004	73.9481	5.3573	0.908311	0.179125
T3A;T33A	0.000569649	6.13e-05	50.0659	2.19587	93.8693	0.895927	43.8034	2.37161	3.05272	0.81773
T3A;T33C	0.000283754	0.000215648	32.4782	7.47272	96.2083	8.45809	63.7302	11.2863	0.602264	0.234707
T3A;T33G	0.00158795	0.0103806	68.2563	6.04668	94.244	29.4597	25.9877	30.0739	0.380889	0.520751
T3A;C34A	0.000480573	0.000125478	44.4939	3.99391	95.6105	1.42976	51.1166	4.24212	1.86595	0.659308
T3A;C34G	0.000301534	0.000210434	25.9789	5.4378	66.3495	6.0125	40.3706	8.10677	1.08039	0.643823
T3A;C34T	0.000668398	0.000136858	27.931	3.16858	92.4499	2.46605	64.5188	4.01514	1.48702	0.381955
T3A;T35A	0.00071966	0.000112414	34.3795	2.49359	88.6264	1.95114	54.2469	3.16622	2.20136	0.615165
T3A;T35C	0.000184755	4.93e-05	39.14	3.63107	92.5768	1.55642	53.4368	3.95058	0.939135	0.167542
T3A;T35G	0.000232982	9.48e-05	35.0305	5.13743	94.3881	3.02719	59.3576	5.96297	0.796082	0.203047
T3A;T36A	0.000480798	0.000195426	12.099	3.45496	77.3191	6.62318	65.2201	7.47016	0.975565	0.304206
T3A;T36C	0.00752857	0.0215036	1.42087	1.99706	57.6653	44.7516	56.2445	44.7962	0.584198	0.337691
T3A;T36G	4.64e-05	1.67e-05	28.3397	3.83487	78.0329	2.40198	49.6932	4.52501	0.779403	0.207639
T3A;T37A	0.00190558	0.00145048	8.67449	2.97067	89.2351	16.5112	80.5606	16.7763	0.675529	0.210953
T3A;T37C	0.000336669	0.000158789	41.8274	4.68545	89.1537	3.8505	47.3262	6.06463	0.865349	0.290962
T3A;T37G	0.000110544	3.82e-05	7.56193	2.42268	74.6852	4.01746	67.1233	4.69141	0.783132	0.174623
T3A;C38A	0.00391946	0.00499796	7.9466	2.74584	90.9059	29.4361	82.9593	29.5639	0.639658	0.230007
T3A;C38G	0.00124395	0.000738686	9.07006	3.16245	89.0733	12.2776	80.0033	12.6783	0.736597	0.213711
T3A;C38T	0.00743481	0.0395856	4.59369	3.54197	100	108.215	95.4063	108.273	0.435416	0.29425
T3A;A39C	0.000486811	0.000607703	6.24485	3.5695	86.2832	18.561	80.0384	18.9011	0.497226	0.187041
T3A;A39G	0.000566237	0.000184711	26.4119	4.47974	90.3088	4.09715	63.8969	6.07081	1.25565	0.450837
T3A;A39T	0.000329313	0.000117024	16.3922	3.53919	82.4717	4.66388	66.0795	5.85471	0.912244	0.231448
T3A;T40A	0.000763027	0.000237305	13.1221	2.96505	66.4295	5.74703	53.3075	6.46683	2.34386	1.41687
T3A;T40C	0.000835443	0.000211105	8.65663	2.29128	70.2968	5.93865	61.6402	6.36534	2.49985	1.1574
T3A;T40G	0.000937874	0.000191765	11.1616	1.82631	71.7265	4.44009	60.5649	4.80103	1.59763	0.451009
T3A;T41A	0.000795052	0.000217948	9.18331	1.81828	80.4123	5.23045	71.229	5.53749	0.875164	0.153324
T3A;T41C	0.00174658	0.00135124	20.329	3.62295	79.6217	14.3789	59.2927	14.8283	0.814461	0.379499
T3A;T41G	0.00273873	0.000996349	9.29793	2.13839	62.6103	8.5834	53.3123	8.84576	1.80635	0.806192
T3A;G42A	0.000754423	0.000304367	5.36756	2.46568	74.7228	7.70604	69.3552	8.0909	1.0553	0.327511
T3A;G42C	0.000519172	0.000151881	10.9129	1.97561	76.8715	4.73266	65.9586	5.12846	0.824224	0.143727
T3A;G42T	0.000591542	0.000241814	11.2287	3.17584	71.7981	7.67108	60.5694	8.3025	1.20208	0.494035
T3A;C43A	0.00242645	0.000643231	8.63685	2.13471	82.5163	7.66859	73.8794	7.96017	1.68426	0.590192
T3A;C43G	0.00468938	0.000899473	6.70611	0.956626	58.1674	5.02887	51.4613	5.11905	2.11139	0.618359
T3A;C43T	0.000536069	9.07e-05	16.0673	1.91166	72.2688	3.51845	56.2015	4.00423	2.56606	1.3057
T3A;G44A	0.00517369	0.00347735	3.91327	0.676726	39.1853	9.90859	35.272	9.93167	1.02027	0.32049
T3A;G44C	0.0012027	0.00046441	8.35073	1.85562	90.7566	7.69246	82.4059	7.91311	0.674335	0.111661
T3A;G44T	0.00181374	0.000814868	6.86561	2.21414	71.7186	11.1721	64.853	11.3893	1.13615	0.431685
T3A;C45A	0.0396909	0.411455	3.46775	1.99253	58.0975	219.274	54.6298	219.283	0.679759	0.931904
T3A;C45G	0.0056189	0.00618487	3.2103	1.36284	39.0391	18.2429	35.8289	18.2937	1.2241	0.771258
T3A;C45T	0.0019318	0.000882475	8.41814	2.45156	50.0628	9.73517	41.6446	10.0391	2.02404	1.49895
T3A;G46A	0.00304496	0.0347133	26.5548	6.17231	100	95.6387	73.4452	95.8377	0.237534	0.256641
T3A;G46C	0.00232704	0.000398695	15.642	1.565	88.1068	4.64559	72.4648	4.90212	1.29292	0.24729
T3A;G46T	0.0116759	0.0252613	46.8492	3.40466	100	51.6008	53.1508	51.713	1.01923	0.903376
T3A;G47A	1.7e-07	1.88883	47.561	10.6628	86.7417	30.8257	39.1807	32.6177	1.97e-08	0.13022
T3A;G47C	0.00329653	0.000707291	54.6352	1.47767	76.5464	2.58897	21.9112	2.98098	3.66371	2.08356
T3A;G47T	0.00852948	0.136272	37.1525	5.58479	100	110.016	62.8475	110.158	0.218767	0.263297
T3A;G48A	0.000745775	0.000145514	12.5939	1.02973	35.2074	1.83909	22.6135	2.10774	3.04352	1.23184
T3A;G48C	2.5	339.794	27.6819	8.33408	96.8124	934.622	69.1306	934.659	0.165009	0.652409
T3A;G48T	0.036855	0.22566	20.9485	3.0138	100	156.554	79.0515	156.583	0.583357	0.479718
T3A;G49A	0.0390549	0.216777	5.72574	1.93865	100	210.177	94.2743	210.185	0.706744	0.516772
T3A;G49C	0.00267517	0.00144964	1.9521	2.05381	14.4128	5.65415	12.4607	6.01561	5	12.6106
T3A;G49T	0.0128014	0.00664954	4.52069	0.960076	17.2983	10.1454	12.7776	10.1907	5	25.667
T3A;A50C	NA	NA	NA	NA	NA	NA	NA	NA	NA	NA
T3A;A50G	0.0027459	0.000650591	11.3527	1.3152	44.3394	4.3929	32.9866	4.58555	2.616	1.26469
T3A;A50T	NA	NA	NA	NA	NA	NA	NA	NA	NA	NA
T3A;C51A	1.25e-07	4.75156	8.57143	6.73703	22.4882	26.9059	13.9168	27.7365	2.38e-08	0.421884
T3A;C51G	1.97e-07	1.644	7.62712	2.46316	27.0724	11.0178	19.4453	11.2898	1.44e-07	0.103136
T3A;C51T	0.266928	6.3992	10.6808	3.60052	100	576.05	89.3192	576.062	0.407442	0.532815
T3A;G52A	2.5	139.089	2.51629	1.93827	95.4583	635.506	92.942	635.509	0.194124	0.306461
T3A;G52C	0.0048008	0.00208427	11.347	2.72633	45.4666	10.1738	34.1196	10.5327	2.99819	3.9456
T3A;G52T	1.21e-05	318.612	8.53658	7.84989	18.6627	15.1171	10.1261	17.0337	5.14e-08	0.445078
T3A;A53C	0.0122445	0.027194	8.76886	2.61882	71.1974	71.0378	62.4285	71.0861	1.17909	1.13214
T3A;A53G	0.00193835	0.000379294	8.12586	1.29976	74.3218	5.05561	66.1959	5.22002	1.4101	0.29529
T3A;A53T	0.000207401	0.00206875	13.8217	2.44001	11.1837	2.17448	-2.63799	3.26834	5	93.286
T3A;C54A	1.48e-05	0.00205211	41.3119	9.89739	53.3588	134.272	12.0469	134.636	0.152144	3.02329
T3A;C54G	NA	NA	NA	NA	NA	NA	NA	NA	NA	NA
T3A;C54T	NA	NA	NA	NA	NA	NA	NA	NA	NA	NA
T3A;C55A	0.0193628	0.132216	7.78081	3.38657	72.8907	111.38	65.1099	111.431	0.472612	0.400893
T3A;C55G	0.00236725	34606.9	9.21053	3.98671	28.1878	7.21451	18.9773	8.24275	1.5e-08	0.169438
T3A;C55T	0.000693364	0.000362832	15.8925	4.91183	80.7443	8.56132	64.8519	9.87027	0.939611	0.40867
T3A;C56A	0.00841488	0.0102449	6.40947	1.56884	70.0041	31.2107	63.5946	31.2501	0.951069	0.439296
T3A;C56G	0.423545	18.0334	1.618	1.09111	100	2318.88	98.382	2318.88	0.692944	1.12539
T3A;C56T	0.00201253	0.000523658	14.0097	2.07022	76.983	5.98958	62.9733	6.33726	1.37853	0.407097
T3A;T57A	0.00284512	0.000859984	6.1516	1.47776	61.46	7.77055	55.3084	7.90982	1.79943	0.697322
T3A;T57C	0.000768487	0.000143712	7.83689	1.15276	70.0081	4.10867	62.1712	4.26732	1.63532	0.400386
T3A;T57G	0.0658097	0.653435	1.05749	1.69952	100	258.582	98.9425	258.587	0.429111	0.279404
T3A;G58A	0.00145193	0.000387984	12.2177	1.78583	69.8617	5.88288	57.644	6.14797	1.38824	0.436117
T3A;G58C	0.00013833	0.000133464	4.82169	2.81197	60.3639	9.75807	55.5422	10.1552	0.54626	0.227973
T3A;G58T	0.000180936	6e-05	24.6096	3.46285	86.8794	3.36181	62.2698	4.82629	0.671611	0.125859
T3A;C59A	0.000318199	0.000217684	32.3955	8.29377	89.2519	6.47793	56.8564	10.5238	1.00554	0.535836
T3A;C59G	0.00108134	0.000312234	5.55577	1.30815	46.4921	5.01937	40.9363	5.18703	1.70409	0.646098
T3A;C59T	0.000129492	0.000246776	18.6845	5.84587	83.5449	19.4213	64.8604	20.2821	0.391555	0.241972
T3A;A60C	0.000588291	0.000107025	12.7588	2.30912	72.3385	4.19302	59.5797	4.7868	2.99141	1.76077
T3A;A60G	0.000552294	0.000139436	12.7172	2.25493	68.4299	4.87674	55.7127	5.37283	5	11.0397
T3A;A60T	0.00258484	0.000601154	7.66303	1.48353	75.5741	6.60031	67.911	6.76498	1.48589	0.400705
T3A;G61A	0.000702219	0.000932964	10.6228	5.96788	68.4855	20.614	57.8627	21.4605	0.804708	0.592469
T3A;G61C	0.000111863	3.2e-05	10.2526	3.40939	80.3658	3.23352	70.1132	4.6989	1.02416	0.247577
T3A;G61T	0.000997587	0.000636864	6.69957	2.41018	96.9989	11.8934	90.2993	12.1351	0.56706	0.117816
T3A;A62C	0.000105164	4.14e-05	46.6446	3.2782	99.86	2.71675	53.2154	4.25762	0.470862	0.0862189
T3A;A62G	0.000131961	0.000162687	21.3936	8.12694	65.3738	9.74481	43.9802	12.6889	0.723846	0.54979
T3A;A62T	0.000496115	0.000403071	38.2434	7.31388	98.6335	9.32973	60.3901	11.8548	0.565268	0.242163
T3A;G63A	0.00131367	0.000200142	10.1545	1.95086	88.7502	3.72422	78.5957	4.20424	1.5974	0.342339
T3A;G63C	0.000809779	9.93e-05	17.5452	2.35769	93.589	1.50625	76.0438	2.79777	1.8542	0.339324
T3A;G63T	0.000156069	2.08e-05	16.2393	2.715	96.1116	0.691681	79.8723	2.80172	1.37699	0.150394
T3A;A64C	0.000724244	7.3e-05	10.3829	1.74005	91.2679	1.46044	80.8851	2.2717	1.47521	0.186999
T3A;A64G	3.23e-05	2.34e-05	20.3661	4.91077	82.8073	7.49443	62.4412	8.96003	0.482765	0.227969
T3A;A64T	0.000221206	3.65e-05	16.8147	2.65975	95.0535	1.38746	78.2388	2.99988	1.00607	0.116464
T3A;G65A	2.42e-05	5.55e-06	58.2645	2.97016	94.776	0.526985	36.5114	3.01655	1.22719	0.228945
T3A;G65C	6.38e-05	2.16e-05	13.5068	6.65271	90.506	2.38188	76.9992	7.06625	1.0669	0.322574
T3A;G65T	2.66e-05	7.55e-06	28.4285	6.39462	94.0695	1.14364	65.641	6.49608	1.39719	0.346946
T3A;G66A	2.16e-05	1.81e-05	17.3038	5.88451	94.3776	9.76109	77.0737	11.3976	0.376958	0.185762
T3A;G66C	6.39e-05	1.25e-05	19.3784	5.51037	93.8977	1.04114	74.5193	5.60787	1.67694	0.436712
T3A;G66T	7.44e-07	2.43e-06	40.1943	9.79494	100	33.7687	59.8057	35.1605	0.190076	0.41197
T3A;C67A	3.05e-05	1.21e-05	7.93328	4.11359	66.7064	4.28653	58.7731	5.94105	1.11838	0.484341
T3A;C67G	0.00284074	0.000735382	10.2393	1.69059	49.7488	7.07007	39.5096	7.26939	5	6.91836
T3A;C67T	8.3e-05	8.64e-05	9.84715	4.98763	50.9032	7.96863	41.056	9.40083	0.742427	0.505602
T3A;T68A	1.53e-05	2.63e-05	25.9888	6.3163	72.3265	2.96327	46.3378	6.97687	5	42.0592
T3A;T68C	0.000292309	0.00479519	11.3442	4.77761	100	122.474	88.6558	122.567	0.177106	0.291479
T3A;T68G	0.00152907	0.00185901	2.87448	2.86569	52.6878	21.8272	49.8133	22.0145	0.950673	0.693497
T3A;G69A	0.000338116	0.00644101	73.6322	6.06059	100	44.6118	26.3678	45.0216	0.186795	0.399957
T3A;G69C	7.71e-06	4.2e-05	63.8709	10.4378	97.2603	24.0234	33.3894	26.193	0.223663	0.457596
T3A;G69T	6.7e-06	1.89e-05	79.2493	4.9319	94.8361	6.25038	15.5869	7.96184	0.330891	0.562525
T3A;A70C	3.35e-05	2.56e-05	58.2129	6.50527	97.062	1.99508	38.8491	6.80432	0.573933	0.199665
T3A;A70G	0.000708571	0.000176365	16.0243	3.49564	87.7837	4.82458	71.7594	5.95786	1.72895	0.68807
T3A;A70T	0.00264975	0.000269833	11.6917	1.52262	79.9442	2.9258	68.2526	3.29828	2.40226	0.510339
T3A;A71C	0.000333443	0.000130697	65.8555	3.28894	96.6273	1.18048	30.7718	3.49438	1.22668	0.407176
T3A;A71G	5.01e-05	2.82e-05	27.6548	6.19352	92.1071	4.22284	64.4523	7.49614	0.570668	0.193407
T3A;A71T	8.65e-05	2.24e-05	48.1153	6.09076	92.5438	1.4343	44.4285	6.25736	2.85922	1.544
T3A;A72C	0.000813703	0.000141879	44.7769	2.83193	95.7606	1.32789	50.9837	3.1278	1.65185	0.370943
T3A;A72G	0.000347175	0.000202432	25.0209	6.02973	91.7646	7.06334	66.7437	9.287	0.79984	0.316093
T3A;A72T	0.000197385	7.54e-05	56.6197	4.2933	96.108	1.24372	39.4883	4.46982	1.11659	0.300062
T3C;C4A	NA	NA	NA	NA	NA	NA	NA	NA	NA	NA
T3C;C4G	0.00171609	0.00316761	15.7895	4.50081	61.2803	22.8188	45.4909	23.2585	0.645443	0.459141
T3C;C4T	0.000182385	0.000112105	16.4226	2.96067	56.0626	5.02705	39.64	5.83411	0.672429	0.227262
T3C;A5C	1.25e-07	0.163557	13.3334	4.09719	19.0598	1.89298	5.72646	4.51336	2.31294	657641
T3C;A5G	0.00167951	0.000804353	14.7281	3.43606	83.9248	11.4273	69.1968	11.9327	0.984088	0.40082
T3C;A5T	0.00105078	0.000681899	4.77876	2.46419	22.2001	6.45362	17.4214	6.90808	5	12.5806
T3C;G6A	0.000420168	0.00106774	60.4249	3.58488	100	13.9411	39.5751	14.3946	0.310729	0.161229
T3C;G6C	4.31e-05	0.000425331	41.4699	9.73059	100	57.6951	58.5301	58.5099	0.201305	0.36369
T3C;G6T	0.00555239	0.0396851	74.6839	7.46864	100	51.951	25.3161	52.4851	0.610403	1.50604
T3C;C7A	0.000270092	974.203	76.6852	5.61012	93.5544	19.8784	16.8692	20.6549	6.23e-07	0.145026
T3C;C7G	0.000303131	0.000354403	66.3176	5.78408	89.1548	4.88228	22.8372	7.56917	0.793172	0.668521
T3C;C7T	2.7e-05	0.000110991	42.1514	8.17489	100	29.8833	57.8486	30.9813	0.242261	0.291093
T3C;C8A	0.000849389	0.000202801	26.5674	3.33444	89.1912	3.79211	62.6238	5.04961	1.47129	0.496517
T3C;C8G	7.06e-05	6.26e-05	54.2158	4.6807	96.4721	5.15334	42.2563	6.96175	0.410113	0.160478
T3C;C8T	0.000680097	0.000190499	13.0659	2.85161	83.3885	4.86415	70.3227	5.63841	0.91013	0.199422
T3C;G9A	0.0037641	0.000508191	6.31484	0.63531	43.2574	3.36611	36.9426	3.42554	2.79593	0.718442
T3C;G9C	0.0137722	0.0156319	4.06791	0.955442	17.687	18.52	13.6191	18.5446	5	34.0947
T3C;G9T	0.00375449	0.00271255	3.97457	1.90392	16.6345	7.05366	12.66	7.30609	5	8.83674
T3C;G10A	0.00643713	0.00675475	8.25053	2.34234	85.8262	31.1415	77.5757	31.2295	0.956591	0.444402
T3C;G10C	0.00305529	0.00131927	19.5063	2.53199	43.6501	6.68605	24.1438	7.14942	3.04881	3.23698
T3C;G10T	0.0432645	0.390446	7.33276	2.39791	100	679.762	92.6672	679.766	1.30288	2.07652
T3C;A11C	1.25e-07	6.63729	15.2174	16.7316	32.6013	154.498	17.3839	155.401	2.9e-07	0.581981
T3C;A11G	0.0010579	0.00131924	10.4837	3.71324	93.5797	20.2651	83.096	20.6025	0.476031	0.15988
T3C;A11T	0.00102674	0.00700272	0.915729	1.81519	23.1186	28.8816	22.2028	28.9386	0.447311	0.580974
T3C;A12C	0.000307698	23397.6	6.60377	7.55493	17.9846	14.0715	11.3808	15.9714	1.04e-08	0.400402
T3C;A12G	0.00179751	0.00152604	7.6729	3.12308	67.5597	15.905	59.8868	16.2088	0.818649	0.371441
T3C;A12T	0.000820523	0.00419807	1.91367	3.48574	8.94542	12.4008	7.03175	12.8814	0.777433	2.4681
T3C;G13A	0.001583	0.0052416	13.1888	4.64802	94.2062	44.3937	81.0175	44.6363	0.376976	0.215765
T3C;G13C	4.67e-07	13.7991	4.46423	6.16053	22.7106	961.898	18.2464	961.918	3.57e-06	0.35759
T3C;G13T	0.000894879	0.000434151	11.7835	3.27138	63.978	9.26157	52.1945	9.82235	1.23753	0.673832
T3C;C14A	1.75e-06	183.711	12.1795	8.5509	14.1006	13.4287	1.9211	15.9201	2.06e-08	1.20307
T3C;C14G	NA	NA	NA	NA	NA	NA	NA	NA	NA	NA
T3C;C14T	0.0103528	0.0101088	6.8397	2.11277	19.3699	9.46889	12.5302	9.70174	5	17.6551
T3C;G15A	0.00112358	0.0116721	11.0676	3.07896	6.02824	10.4844	-5.0394	10.9272	0.459305	1.42308
T3C;G15C	0.0608802	0.642316	9.40367	3.09633	100	360.361	90.5963	360.374	0.625315	0.708055
T3C;G15T	0.000247683	2922.46	20.8955	4.33557	46.4514	5.54177	25.5559	7.03622	1.1e-08	0.0664159
T3C;G16A	2.89e-06	136.01	0.819672	0.908757	6.46034	5.95193	5.64066	6.02091	8.02e-09	0.359278
T3C;G16C	0.00156169	37637.3	9.16667	3.13623	19.9698	5.11639	10.8031	6.00112	4.43e-08	0.264917
T3C;G16T	1.3e-05	5.07e-06	0.909329	0.859624	9.42413	0.997239	8.5148	1.3166	2.98594	12.9043
T3C;G17A	1.2e-05	6.88e-05	8.45993	4.01354	15.4845	1.93791	7.02452	4.45691	5	672.478
T3C;G17C	0.0397593	0.216561	19.2407	2.02218	100	294.566	80.7593	294.573	1.13865	1.20063
T3C;G17T	2.34e-05	0.000145305	8.06218	4.21954	12.6834	1.87609	4.62125	4.61781	5	46.3848
T3C;A18C	4.66e-05	4.7e-05	5.42046	1.62476	13.4364	1.36125	8.0159	2.11964	5	67.7512
T3C;A18G	1.25e-07	2.37633	10.9091	2.99796	21.7648	166.632	10.8557	166.659	1.62e-06	0.216028
T3C;A18T	NA	NA	NA	NA	NA	NA	NA	NA	NA	NA
T3C;C19A	4.74e-05	2201	13.4921	6.00645	17.8291	13.7362	4.33705	14.992	5.91e-08	0.956582
T3C;C19G	7.39e-05	4858.15	5.66862	5.46237	12.1066	29.858	6.43798	30.3535	1.44e-07	0.799104
T3C;C19T	2.5	33503.4	4.67276	2.84404	11.0444	1811.78	6.37159	1811.78	0.0415106	8.39877
T3C;G20A	0.00393264	0.00240985	12.6521	3.04443	32.3724	8.02068	19.7202	8.57903	5	8.65004
T3C;G20C	2.38e-05	0.0001	9.51969	2.7677	5.83135	0.943143	-3.68833	2.92398	4.75983	27.6125
T3C;G20T	NA	NA	NA	NA	NA	NA	NA	NA	NA	NA
T3C;A21C	3.91e-07	7.49135e+07	8.90411	3.27221	14.6801	2.73873e+08	5.77596	2.73873e+08	5.01e-07	23.7779
T3C;A21G	0.00144084	0.000391735	13.6404	3.35369	74.8188	6.59816	61.1784	7.40155	2.5975	1.61673
T3C;A21T	8.09e-06	614.402	11.2069	11.6011	14.8349	26.5887	3.628	29.0094	6.39e-08	2.15222
T3C;C22A	3.44e-07	7.18429	6.24982	4.41828	28.8651	6690.5	22.6153	6690.5	2.83e-05	0.19147
T3C;C22G	0.000144756	0.000927172	6.48986	2.21462	3.29328	0.949742	-3.19658	2.40968	5	223.728
T3C;C22T	0.000645646	26108.1	4.72973	2.33932	10.3154	4.06599	5.58569	4.69092	7.55e-09	0.19253
T3C;C23A	0.0135952	0.0159551	10.005	1.26438	24.1074	20.4229	14.1024	20.462	5	39.9352
T3C;C23G	NA	NA	NA	NA	NA	NA	NA	NA	NA	NA
T3C;C23T	1.25e-07	3.74145	7.29167	4.47214	20.2815	12.457	12.9899	13.2354	1.05e-08	0.168075
T3C;C24A	NA	NA	NA	NA	NA	NA	NA	NA	NA	NA
T3C;C24G	0.00368391	421574	14.3299	14.4929	0	19.3338	-14.3299	24.1628	5.94e-09	0.465731
T3C;C24T	0.0201292	0.0473111	13.7034	3.131	100	156.86	86.2966	156.891	1.62409	1.76626
T3C;G25A	4e-06	213.809	5.55556	3.48285	4.66535	4.41012	-0.890209	5.61956	1.37e-08	0.663493
T3C;G25C	0.0717701	0.568828	9.67224	1.20856	100	487.455	90.3278	487.457	1.01959	0.95892
T3C;G25T	0.0028044	0.00282518	10.6862	1.60608	15.6198	3.30398	4.93363	3.67366	5	30.9122
T3C;T26A	0.00179356	0.000260952	16.054	2.28438	87.0553	3.37124	71.0012	4.0723	2.07522	0.541506
T3C;T26C	0.000750371	0.000156353	27.332	3.39798	97.6557	2.27571	70.3237	4.08963	1.21997	0.295085
T3C;T26G	0.00319711	0.000714654	21.5036	2.99082	80.9275	5.49068	59.4239	6.2524	2.35037	1.07569
T3C;T27A	0.00188473	0.00026194	17.7101	2.24401	90.7228	2.90159	73.0127	3.66808	1.70082	0.364395
T3C;T27C	0.00107611	0.000308327	15.1022	3.99381	85.9094	6.3143	70.8072	7.47134	1.61411	0.681933
T3C;T27G	0.00660278	0.00509496	8.99115	2.30585	58.6718	19.7431	49.6806	19.8773	1.5035	0.985226
T3C;T28A	0.00189478	0.000297618	18.245	2.2319	87.6335	3.44471	69.3885	4.10456	1.56334	0.349041
T3C;T28C	0.00250339	0.00045753	14.8374	3.32231	65.1039	7.11376	50.2664	7.85133	5	5.94707
T3C;T28G	0.00413207	0.00286165	14.0842	2.42367	42.3737	9.96607	28.2896	10.2565	1.84909	1.81361
T3C;T29A	0.00161064	0.000290018	21.9135	2.70664	90.7014	3.41097	68.7879	4.35437	1.43489	0.357961
T3C;T29C	0.000461772	0.000499496	51.9685	6.35895	97.7811	9.58249	45.8126	11.5005	0.514574	0.266008
T3C;T29G	0.00351674	0.00137436	9.78541	2.21512	58.7557	8.8468	48.9703	9.1199	1.77333	0.957773
T3C;C30A	0.00232541	0.000646218	9.14011	2.50708	71.5981	7.72446	62.458	8.12113	1.86028	0.779208
T3C;C30G	0.0136727	0.0245547	9.23601	2.07783	91.3364	63.6661	82.1004	63.7	0.927233	0.484961
T3C;C30T	0.00182301	0.000383837	16.3553	3.07045	88.6398	5.19399	72.2845	6.03367	1.92531	0.683101
T3C;C31A	0.00339449	0.000533914	3.68051	0.795254	57.6686	5.55089	53.9881	5.60756	5	2.26391
T3C;C31G	0.0015777	0.00207574	6.97181	3.71783	100	26.5034	93.0282	26.7629	0.521173	0.191997
T3C;C31T	0.0029905	0.000498604	9.90343	1.53556	83.2258	5.30006	73.3224	5.51802	1.95897	0.513259
T3C;C32A	0.00151321	0.00019669	16.7508	1.67925	86.6977	3.06917	69.9469	3.49853	1.64859	0.327308
T3C;C32G	0.000155738	0.000400842	32.0168	18.0013	90.5175	27.1046	58.5007	32.5378	0.530265	0.651547
T3C;C32T	0.00139023	0.000220833	19.845	2.69894	88.7254	3.33018	68.8803	4.28653	2.33884	0.751569
T3C;T33A	0.00193082	0.000549252	25.635	4.15437	92.7785	5.66329	67.1435	7.02365	1.46223	0.582639
T3C;T33C	0.000939039	0.000458634	14.2151	4.20265	86.0009	9.16712	71.7858	10.0846	0.774016	0.247452
T3C;T33G	0.00510549	0.00127626	25.2298	2.14252	47.6745	4.70249	22.4447	5.16758	5	13.5838
T3C;C34A	0.000855649	0.000229543	30.9111	4.23438	91.3235	3.45412	60.4124	5.46452	1.69457	0.689988
T3C;C34G	0.000565571	0.000262823	35.0261	5.62467	93.345	5.26481	58.3189	7.70423	0.911163	0.370585
T3C;C34T	0.0010933	0.000231029	24.7156	3.0879	88.5964	3.50655	63.8808	4.67237	1.56671	0.48022
T3C;T35A	0.00104277	0.00128079	19.238	6.7514	100	21.2702	80.762	22.316	0.53523	0.25307
T3C;T35C	0.0010243	0.000252523	24.9473	3.84509	84.572	3.91972	59.6248	5.4908	1.95922	0.929259
T3C;T35G	0.00157182	0.00185573	59.5195	6.09763	100	13.1251	40.4805	14.4724	0.616854	0.443098
T3C;T36A	0.00127358	0.00107384	13.8283	6.01228	84.064	17.3857	70.2357	18.3959	0.805113	0.466953
T3C;T36C	0.00250942	0.000710529	8.07051	1.28569	40.337	4.40298	32.2665	4.58685	2.0653	0.831625
T3C;T36G	8.98e-05	4.94e-05	36.8328	9.33134	81.787	4.07675	44.9542	10.183	5	7.1637
T3C;T37A	0.000919038	0.000325802	10.7861	2.65094	70.8958	7.96325	60.1097	8.39291	1.47039	0.670429
T3C;T37C	0.00385754	0.00132784	21.323	3.2054	76.5523	9.55436	55.2293	10.0777	1.95713	1.07061
T3C;T37G	0.000258337	0.000155201	15.4037	5.76752	86.0785	7.91561	70.6748	9.79394	0.778927	0.281591
T3C;C38A	0.00169527	0.0016878	7.60047	3.56315	81.0651	20.1107	73.4647	20.4239	0.759264	0.343822
T3C;C38G	0.00115969	0.000383015	12.382	3.23352	78.0692	7.23029	65.6872	7.9204	1.62131	0.785247
T3C;C38T	0.00108159	0.000771681	4.15249	2.63456	75.2094	15.2812	71.0569	15.5067	0.887659	0.3533
T3C;A39C	0.00239347	0.000406568	14.0823	1.55017	80.3343	4.48573	66.252	4.74603	1.52023	0.328301
T3C;A39G	0.001514	0.000170329	16.6944	1.39607	71.7441	2.67893	55.0497	3.02087	2.21194	0.482235
T3C;A39T	0.000759399	0.000378396	15.633	4.54451	81.6329	8.24813	65.9999	9.41723	0.877838	0.343103
T3C;T40A	0.00104761	0.000653833	9.49422	2.98096	70.3403	11.2858	60.8461	11.6728	0.878814	0.357671
T3C;T40C	0.000658654	0.000181561	13.2019	2.83244	67.5621	5.24332	54.3602	5.95945	1.66722	0.73935
T3C;T40G	0.00177895	0.000800934	12.2983	2.54751	70.4909	10.1399	58.1926	10.4551	1.13912	0.486622
T3C;T41A	0.000952033	0.000227197	12.2007	2.90576	67.7739	4.86267	55.5732	5.66472	5	3.55181
T3C;T41C	0.00110857	0.000286883	13.9177	2.91193	63.4728	4.98018	49.555	5.76901	3.07915	1.88369
T3C;T41G	0.0047463	0.0007382	10.5055	2.1849	69.1065	7.58046	58.6009	7.88906	5	4.34934
T3C;G42A	0.00183245	0.00168912	6.68832	3.75196	77.3229	20.8834	70.6346	21.2177	0.912312	0.514422
T3C;G42C	0.00117318	0.000354155	13.1514	2.5468	84.0843	6.58925	70.9329	7.0643	0.959956	0.251826
T3C;G42T	0.00100285	0.000544567	12.7757	3.84315	84.9482	10.611	72.1724	11.2856	0.865871	0.322433
T3C;C43A	0.00321508	0.000993887	7.8351	1.5893	87.9136	9.04773	80.0785	9.18626	1.05662	0.236225
T3C;C43G	0.00546447	0.000821607	7.84485	0.791352	45.7795	4.08719	37.9347	4.1631	3.06593	1.21701
T3C;C43T	0.00464568	0.01063	5.69636	3.28281	100	47.9689	94.3036	48.0811	0.483813	0.196213
T3C;G44A	0.00515875	0.00208921	6.57241	1.28247	38.9309	8.51947	32.3585	8.61546	2.19098	1.31942
T3C;G44C	0.00110866	0.000416182	50.7161	3.47872	76.6412	3.86996	25.9251	5.20366	3.11923	4.14302
T3C;G44T	0.00300605	0.000685992	14.5278	1.5938	67.1089	5.62805	52.5811	5.84937	1.8628	0.575763
T3C;C45A	0.0566108	0.549382	9.10679	2.05802	100	574.626	90.8932	574.63	1.02929	1.41555
T3C;C45G	0.0559241	0.629751	3.78639	2.16969	100	510.202	96.2136	510.206	0.764011	0.987862
T3C;C45T	0.0112821	0.0526147	8.4467	4.50755	89.7866	100.3	81.3399	100.401	0.530651	0.410476
T3C;G46A	8.67e-05	8.73e-05	19.4521	5.25997	78.5335	9.98339	59.0814	11.2843	0.541502	0.265698
T3C;G46C	0.00472491	0.0046217	12.5443	2.70529	52.5879	17.9657	40.0436	18.1682	1.35952	1.13192
T3C;G46T	NA	NA	NA	NA	NA	NA	NA	NA	NA	NA
T3C;G47A	1.25e-07	1.6219	34.6535	7.85229	62.8177	31.6545	28.1642	32.6138	3.24e-08	0.255057
T3C;G47C	0.0280739	6.27987	47.7988	4.84273	100	29096.6	52.2012	29096.6	4.25431	466.063
T3C;G47T	0.0585599	1.36624	48.3454	3.25222	100	847.499	51.6546	847.505	1.1022	3.89646
T3C;G48A	2.5	949.529	26.2155	9.13505	88.4241	1371.32	62.2086	1371.35	0.104824	1.00043
T3C;G48C	NA	NA	NA	NA	NA	NA	NA	NA	NA	NA
T3C;G48T	2.98e-05	269.255	64.6552	6.47511	74.3658	8.46317	9.71066	10.6561	1.85e-08	0.093963
T3C;G49A	0.0373342	502.774	10.5738	1.47166	0	588329	-10.5738	588329	5	10482.9
T3C;G49C	0.0276506	0.132109	12.2411	2.27947	100	528.919	87.7589	528.924	2.34464	5.08944
T3C;G49T	0.000105893	2328.06	6.54762	2.47983	10.1238	3.75415	3.57616	4.49924	4.05e-08	0.40917
T3C;A50C	NA	NA	NA	NA	NA	NA	NA	NA	NA	NA
T3C;A50G	1.25e-07	8.96195e+06	13.3928	15.8489	26.5812	1230736101	13.1884	1230736101	2.62e-06	244.255
T3C;A50T	0.00122057	0.000371007	5.93007	1.03268	14.3903	1.95136	8.46019	2.20777	5	16.898
T3C;C51A	1.57e-06	22.867	16.3265	11.334	49.454	204.731	33.1275	205.044	8.58e-07	0.234339
T3C;C51G	NA	NA	NA	NA	NA	NA	NA	NA	NA	NA
T3C;C51T	0.0261557	2.67931	16.6885	1.77393	100	23088.7	83.3115	23088.7	5	309.294
T3C;G52A	0.0905252	1.3775	10.8227	2.33189	100	702.491	89.1773	702.495	0.78773	1.17626
T3C;G52C	0.00809928	573157	15.7508	8.00866	0	46.6674	-15.7508	47.3496	6.73e-08	0.296313
T3C;G52T	0.00097348	0.00237212	7.37317	2.70501	11.3592	3.39767	3.98598	4.34295	5	37.5999
T3C;A53C	0.0291364	0.121014	11.0835	2.28557	100	222.217	88.9165	222.228	1.09917	1.02213
T3C;A53G	0.00287294	0.000532415	9.84533	1.59429	65.2922	5.11709	55.4469	5.3597	2.4995	0.783407
T3C;A53T	NA	NA	NA	NA	NA	NA	NA	NA	NA	NA
T3C;C54A	1.25e-07	1.03961	76.087	7.76167	57.2226	20.5091	-18.8643	21.9287	3.81e-08	0.181269
T3C;C54G	2.71e-05	6.18e-05	22.2561	3.21353	12.0533	1.13008	-10.2028	3.40645	5	17.8443
T3C;C54T	5.41e-05	2158.34	9.09091	3.59195	6.96596	8.32727	-2.12495	9.06894	1.81e-07	1.323
T3C;C55A	NA	NA	NA	NA	NA	NA	NA	NA	NA	NA
T3C;C55G	1.25e-07	4.43887	63.5417	23.5435	8.07025	119.952	-55.4714	122.241	8.67e-08	0.253813
T3C;C55T	0.00230203	0.000901629	55.3668	2.76071	79.1919	4.17691	23.8251	5.00681	2.59137	2.27964
T3C;C56A	0.00181904	0.00115851	35.9588	3.33145	52.1751	5.25523	16.2163	6.22222	5	8.6607
T3C;C56G	NA	NA	NA	NA	NA	NA	NA	NA	NA	NA
T3C;C56T	0.0027134	0.000651624	25.895	2.01588	60.7962	3.94586	34.9012	4.43098	2.45337	1.27418
T3C;T57A	0.00264044	0.00273482	5.61033	2.94101	68.6415	23.5538	63.0312	23.7367	1.04247	0.687557
T3C;T57C	0.00156185	0.000528772	5.38919	1.15558	90.2508	7.89449	84.8616	7.97862	0.728236	0.0973004
T3C;T57G	0.0440977	0.448598	6.96094	3.98682	100	301.64	93.0391	301.666	0.549907	0.6052
T3C;G58A	0.00151012	0.000276045	26.0576	1.55914	64.6007	3.03193	38.5431	3.40933	2.27153	0.854464
T3C;G58C	0.00209209	0.00273606	32.571	6.35873	83.063	22.4371	50.4919	23.3208	0.821008	0.707351
T3C;G58T	0.00542955	0.0148768	42.9116	6.33904	100	48.6844	57.0884	49.0953	0.692926	0.724526
T3C;C59A	0.00886922	0.0119155	10.1787	1.81169	36.5411	19.877	26.3624	19.9594	1.55028	1.57169
T3C;C59G	0.0179718	0.0378051	7.07948	1.30816	56.3639	65.4532	49.2844	65.4663	1.36516	1.1049
T3C;C59T	0.00643778	0.00723495	10.3565	1.53422	52.9059	19.8439	42.5493	19.9031	0.989084	0.487423
T3C;A60C	0.0025774	0.000703475	34.7253	2.26772	82.0225	5.0906	47.2972	5.57286	1.67386	0.670255
T3C;A60G	0.000926635	0.000170124	7.43671	1.88357	81.1512	4.54164	73.7145	4.91674	1.99553	0.603445
T3C;A60T	0.00451586	0.000937361	5.9416	1.39538	55.901	6.77693	49.9594	6.91909	3.02294	1.5126
T3C;G61A	0.00120937	0.000770191	4.34413	2.66767	81.3573	14.3092	77.0131	14.5557	0.92384	0.339624
T3C;G61C	0.000181746	0.000105262	8.89924	3.18005	84.7919	7.74439	75.8927	8.37187	0.555228	0.143632
T3C;G61T	0.00217097	0.00106716	8.2153	2.51086	92.0657	12.6344	83.8504	12.8815	0.864997	0.265701
T3C;A62C	0.000307913	0.000145284	56.924	2.67647	100	3.36634	43.076	4.30067	0.471018	0.101246
T3C;A62G	0.309288	30.0147	40.8104	5.74979	100	411.636	59.1896	411.676	0.131716	0.428938
T3C;A62T	0.000474176	0.000330577	46.7355	5.25149	96.3997	6.94675	49.6642	8.70836	0.571032	0.212439
T3C;G63A	0.0013597	0.000113384	9.90959	1.26104	90.4604	2.05353	80.5508	2.40982	1.64292	0.20744
T3C;G63C	0.000937468	0.00015041	19.0251	2.96968	92.6956	2.2236	73.6705	3.70991	1.71464	0.401867
T3C;G63T	0.000961268	0.000138435	4.11709	1.74254	90.0437	3.14901	85.9266	3.59899	1.60459	0.338508
T3C;A64C	0.00126516	7.39e-05	12.056	1.04339	90.2838	1.15448	78.2278	1.55611	1.77908	0.164297
T3C;A64G	8.37e-05	6.19e-05	35.6914	7.52682	86.776	5.11441	51.0846	9.10001	0.737579	0.348971
T3C;A64T	0.000839599	0.000140986	8.77482	2.11026	89.8142	2.92427	81.0394	3.60618	1.5269	0.351095
T3C;G65A	0.000704493	0.000129164	5.84243	2.82193	90.1935	3.13846	84.351	4.22057	1.79282	0.533285
T3C;G65C	0.0011253	0.000191814	1.18983	1.13945	82.0654	4.16314	80.8756	4.31626	1.37895	0.259566
T3C;G65T	0.000918229	0.000111658	9.21257	2.62148	85.1968	2.42345	75.9842	3.57005	3.29423	0.93002
T3C;G66A	0.000969242	0.00020763	3.2284	1.78697	81.5652	5.2292	78.3368	5.5261	1.85454	0.597654
T3C;G66C	0.00022289	3.08e-05	3.53102	1.8972	94.8352	1.4565	91.3042	2.39181	1.00217	0.0983472
T3C;G66T	0.000544596	0.000174867	10.1281	4.1536	91.6787	4.46483	81.5506	6.09812	1.1829	0.374407
T3C;C67A	0.000834489	0.000129505	27.0181	2.17276	74.2725	2.55223	47.2543	3.35183	3.57854	1.18119
T3C;C67G	0.0017696	0.00113149	8.18559	3.67896	78.6432	15.2003	70.4576	15.6392	1.02132	0.535902
T3C;C67T	0.00164039	0.000759663	17.8375	2.90586	70.2931	8.1867	52.4556	8.68712	1.28678	0.60699
T3C;T68A	0.000723206	0.000175802	12.671	3.04317	79.5101	4.83406	66.8391	5.71218	2.56893	1.24684
T3C;T68C	0.00159811	0.00114785	2.88357	2.54242	94.0279	19.4536	91.1443	19.6191	0.84226	0.317597
T3C;T68G	0.00315735	0.0012188	5.1853	2.13046	60.5554	11.6227	55.3701	11.8163	1.99477	1.01104
T3C;G69A	0.00123252	0.000184781	26.0795	3.41887	87.1671	2.99298	61.0877	4.54385	3.32879	1.70755
T3C;G69C	0.000965059	0.000256716	17.5311	3.6022	100	5.05948	82.4689	6.21081	0.783023	0.170275
T3C;G69T	0.00090796	0.000169044	28.3419	2.90435	85.7889	2.71236	57.447	3.97393	1.78794	0.537226
T3C;A70C	0.000500139	0.000183485	1.63219	3.24418	94.1274	5.99641	92.4952	6.81774	0.975131	0.283438
T3C;A70G	0.0101975	0.0123491	9.95667	1.54375	46.1171	24.7437	36.1604	24.7918	1.44294	1.14438
T3C;A70T	0.00140874	0.000594932	19.3194	5.86902	100	8.65159	80.6806	10.4544	0.943778	0.407065
T3C;A71C	0.000889188	0.000305713	15.0537	5.25031	89.4406	6.02226	74.3868	7.98958	1.32593	0.533153
T3C;A71G	0.000881009	0.000153414	10.2753	2.5946	91.4169	2.92805	81.1416	3.91221	1.43691	0.30572
T3C;A71T	0.00135702	0.000361645	9.97014	2.817	90.7718	6.26425	80.8017	6.8685	1.12536	0.332967
T3C;A72C	0.00126887	0.000247621	20.7474	3.85343	95.9089	2.75804	75.1615	4.73875	1.88913	0.552408
T3C;A72G	0.00050781	0.000122796	16.446	4.49295	92.8619	2.65756	76.4159	5.22008	1.3317	0.342685
T3C;A72T	0.00116948	0.000225012	30.8511	3.96257	91.1567	2.83674	60.3057	4.8733	2.30155	0.963673
T3G;C4A	5.03e-05	1.06e-05	21.5616	4.20561	49.3644	3.49902	27.8029	5.47086	5	33.1504
T3G;C4G	7e-06	9.88e-06	16.7786	5.58045	54.2617	4.32951	37.4831	7.063	0.745456	0.828698
T3G;C4T	0.000121779	0.000119287	16.8432	5.62767	66.5856	8.59202	49.7424	10.271	0.684264	0.370661
T3G;A5C	0.00023708	0.000292109	14.7326	6.59864	73.6415	13.4105	58.9089	14.946	0.591693	0.330081
T3G;A5G	0.000197483	9.35e-05	27.5318	4.88297	89.7539	4.59692	62.2221	6.70635	0.695197	0.19282
T3G;A5T	8.92e-05	5.91e-05	9.25029	3.2522	36.1829	4.33382	26.9326	5.41838	1.31784	1.1058
T3G;G6A	1.09e-06	5.38e-06	72.6301	6.0745	93.8827	7.96147	21.2526	10.0142	0.290291	0.666984
T3G;G6C	0.00127737	0.000727223	64.2816	4.23315	86.0814	4.72743	21.7997	6.34572	2.44055	3.53777
T3G;G6T	7.38e-05	6.35e-05	49.8795	7.72274	95.8865	4.72358	46.007	9.05278	0.575135	0.263683
T3G;C7A	9.16e-06	7.89e-06	71.0017	4.65864	87.0891	1.25507	16.0874	4.82474	1.47366	1.93352
T3G;C7G	8.13e-06	2.23e-05	79.0566	9.10504	91.3074	2.4851	12.2508	9.43808	1.44703	6.10103
T3G;C7T	6.16e-05	0.000120605	68.1261	3.52873	96.2116	7.46465	28.0855	8.25669	0.303093	0.18575
T3G;C8A	6.63e-05	2.36e-05	40.6111	3.73704	94.4516	2.10646	53.8405	4.28983	0.584438	0.111779
T3G;C8G	1.25e-07	1.18e-06	73.5131	3.32066	93.3694	3.72632	19.8564	4.99122	0.30095	0.679317
T3G;C8T	0.00014181	6.48e-05	49.7586	3.91467	92.8554	2.67913	43.0968	4.74367	0.680218	0.179346
T3G;G9A	0.0048626	0.001828	13.1311	2.27457	83.8298	12.6275	70.6987	12.8307	1.52136	0.586667
T3G;G9C	0.00259204	0.000725306	7.09579	1.32405	22.5756	3.5286	15.4798	3.76883	5	10.0378
T3G;G9T	0.00162403	0.000576315	9.27834	1.14102	29.8759	3.61961	20.5976	3.79519	1.81662	0.935997
T3G;G10A	0.00119538	0.000314521	16.2218	3.07627	96.5694	5.89381	80.3476	6.64833	0.882562	0.201995
T3G;G10C	0.0039908	0.00076393	12.8031	1.79685	58.0771	5.32368	45.274	5.61874	3.14074	1.47795
T3G;G10T	0.00570826	0.0015178	11.9385	0.884193	66.8683	6.96933	54.9298	7.0252	1.40963	0.308448
T3G;A11C	0.00331935	0.000706833	10.4077	1.56621	50.553	5.14485	40.1453	5.37797	5	3.18409
T3G;A11G	0.000102912	4.72e-05	32.5414	7.29715	91.1082	2.71203	58.5668	7.78482	0.940375	0.302319
T3G;A11T	0.0255196	0.166652	8.15755	3.46035	100	185.082	91.8424	185.114	0.575687	0.513536
T3G;A12C	0.0098671	0.00539147	8.55589	1.31552	84.0737	22.0725	75.5178	22.1117	1.43711	0.493559
T3G;A12G	0.00112472	0.000337019	12.127	2.99492	90.3103	6.69697	78.1834	7.33615	0.985854	0.270321
T3G;A12T	0.0463365	0.232616	8.22031	1.36631	100	339.279	91.7797	339.281	1.17789	0.978164
T3G;G13A	1.44e-05	7.47e-05	45.1304	7.01339	100	33.7605	54.8696	34.4813	0.205483	0.299357
T3G;G13C	0.000726402	0.000350368	22.4973	4.58839	86.9304	7.56696	64.4331	8.84942	0.81008	0.283536
T3G;G13T	0.000187954	0.000147879	22.03	5.90015	84.2188	8.44669	62.1888	10.3033	0.584864	0.223079
T3G;C14A	0.00117338	0.00123251	29.3623	2.26779	34.4845	2.97797	5.12218	3.74316	5	59.2484
T3G;C14G	NA	NA	NA	NA	NA	NA	NA	NA	NA	NA
T3G;C14T	0.00228534	0.000814219	20.5459	1.56068	32.8938	2.69821	12.3478	3.11706	5	9.54345
T3G;G15A	0.00023216	0.00142699	7.15551	1.41683	8.95806	1.24893	1.80256	1.88872	4.307	40.3778
T3G;G15C	0.0612747	0.879855	21.8392	5.01647	100	332.317	78.1608	332.355	0.508147	0.746715
T3G;G15T	6.47e-06	74.5122	10.6195	2.35938	22.3154	7.67915	11.6959	8.03344	2.14e-08	0.202626
T3G;G16A	0.00185683	0.00482567	8.93329	1.15916	13.8697	4.27845	4.93637	4.43269	0.812776	1.28036
T3G;G16C	2.5	51998.5	9.51464	7.24342	23.4336	5287.2	13.919	5287.2	0.0358825	10.0849
T3G;G16T	3.01e-05	0.00557845	14.7059	5.32365	15.9252	28.8442	1.21924	29.3313	0.254324	12.7209
T3G;G17A	0.0143557	0.0154134	20.6521	1.59106	58.534	44.4551	37.8818	44.4835	5	26.0059
T3G;G17C	NA	NA	NA	NA	NA	NA	NA	NA	NA	NA
T3G;G17T	0.00772744	0.0096631	15.231	2.05556	52.5001	22.5303	37.2691	22.6238	1.26351	0.988389
T3G;A18C	0.0117843	0.0487157	8.3456	2.19047	40.8348	56.6137	32.4892	56.6561	0.910541	1.18712
T3G;A18G	0.0423058	0.387914	15.3226	1.70192	62.9309	351.29	47.6082	351.294	1.32001	2.44505
T3G;A18T	0.00362522	0.00286779	6.61376	1.30241	15.511	3.98818	8.89722	4.19545	2.28282	3.20252
T3G;C19A	0.0364238	0.196216	37.2401	1.00398	100	412.154	62.7599	412.155	2.00166	3.14816
T3G;C19G	1.25e-07	3.6879	15.2778	5.73181	13.2536	14.8231	-2.02414	15.8927	1.15e-07	1.45602
T3G;C19T	2.5	279.25	6.99775	4.44546	91.856	2452	84.8582	2452	0.348465	1.10322
T3G;G20A	2.66e-06	28.6369	51.8508	13.6052	90.0718	2629.7	38.221	2629.73	1.28e-05	0.144058
T3G;G20C	0.000238577	5541.01	5.45454	2.74302	15.1344	4.58843	9.67989	5.34583	2.09e-08	0.23576
T3G;G20T	1.25e-07	1.79134	39.0625	6.09322	61.5227	27.3521	22.4602	28.0226	7.7e-08	0.190659
T3G;A21C	0.00067133	0.00100418	10.7089	2.44053	20.4736	3.48733	9.76462	4.25648	5	23.6919
T3G;A21G	0.000133824	6.02e-05	27.3684	6.16032	87.3233	3.56159	59.9549	7.11579	1.06244	0.370108
T3G;A21T	0.0033674	0.000611214	14.4003	1.53589	58.0068	4.17032	43.6065	4.44415	2.4361	0.850112
T3G;C22A	1.25e-07	3.20168	33.3333	11.3031	41.8358	48.2298	8.50251	49.5366	1.72e-07	1.47629
T3G;C22G	1.25e-07	3.11321	9.16668	4.51804	7.76596	12.9648	-1.40072	13.7295	4.46e-07	1.80447
T3G;C22T	0.0149151	0.0446508	9.74024	0.750108	19.1133	30.1456	9.37302	30.1549	5	59.0948
T3G;C23A	0.318366	20.1468	15.5238	4.84908	100	2209.35	84.4762	2209.36	0.580402	2.05792
T3G;C23G	1.25e-07	0.00222318	50.5301	7.9482	64.3193	3.14169	13.7892	8.54659	1.62212	6286.45
T3G;C23T	0.00249848	0.000425493	13.2856	1.54669	35.4571	3.23813	22.1716	3.58856	5	6.61389
T3G;C24A	0.215381	10.6201	33.2464	5.37353	100	1211.46	66.7536	1211.47	0.549318	1.8539
T3G;C24G	0.00069138	8670.95	50.6173	5.59071	65.6942	6.82825	15.0769	8.82503	1.86e-08	0.238034
T3G;C24T	0.0302983	89327.5	71.4286	5.21601	96.4867	7.78397	25.0581	9.37001	3.85e-08	0.0880626
T3G;G25A	1.25e-07	2.13e-05	7.48013	3.78245	12.3851	80.4824	4.90495	80.5712	0.115537	5.10364
T3G;G25C	0.0217806	0.0948346	11.4672	2.85558	78.7095	143.547	67.2423	143.575	0.96722	1.0602
T3G;G25T	0.0270398	0.0513813	23.1197	1.27493	100	80.4009	76.8803	80.411	1.0416	0.479681
T3G;T26A	0.000910821	0.000120642	40.1228	1.86778	91.3466	1.33429	51.2239	2.29541	1.53838	0.278273
T3G;T26C	0.000544429	0.000114784	34.4695	3.9515	93.8784	1.75373	59.4089	4.32318	1.77988	0.552517
T3G;T26G	0.000652837	0.000282798	32.1519	5.81627	97.0601	5.15535	64.9082	7.77217	0.838973	0.286201
T3G;T27A	0.000982738	0.000210827	26.477	3.63808	96.7762	2.5929	70.2991	4.46752	1.35187	0.349243
T3G;T27C	0.00013029	2.69e-05	49.1083	2.7051	93.6413	0.813556	44.5331	2.82479	1.20088	0.191879
T3G;T27G	0.00349297	0.00037807	15.3564	1.7816	85.3178	3.24312	69.9614	3.70026	2.20331	0.489655
T3G;T28A	0.00146467	0.000219625	32.8649	2.90369	93.4609	1.95377	60.596	3.4998	1.8885	0.453249
T3G;T28C	0.00104743	0.000181246	25.5256	3.21691	94.0102	2.14751	68.4847	3.86785	1.5906	0.389279
T3G;T28G	0.00176897	0.000338123	57.0884	2.05954	83.6044	1.76874	26.5161	2.71481	5	2.64666
T3G;T29A	0.00131605	0.000140983	20.8139	2.09136	93.3409	1.70713	72.527	2.69964	1.6149	0.255572
T3G;T29C	0.000275683	0.000273828	66.0705	5.79657	95.9408	4.57403	29.8703	7.38391	0.634051	0.365621
T3G;T29G	0.0031451	0.000583805	17.7048	2.99595	75.9589	4.55759	58.254	5.45412	3.16675	1.47749
T3G;C30A	0.00164186	0.000182304	12.1442	1.61732	82.1268	2.57169	69.9826	3.03798	1.98824	0.385238
T3G;C30G	0.00240825	0.00110437	7.34558	3.37945	80.1189	12.5206	72.7733	12.9686	1.31083	0.683657
T3G;C30T	0.00103158	8.7e-05	19.2677	1.59989	91.109	1.30548	71.8413	2.06492	1.87406	0.26002
T3G;C31A	0.00194123	0.000639469	7.57037	2.06338	89.1142	8.70788	81.5438	8.94901	1.01817	0.266432
T3G;C31G	0.00181671	0.000358885	21.3886	3.1765	88.7093	4.00771	67.3208	5.1139	1.64448	0.496432
T3G;C31T	0.00149502	0.000128001	16.5006	1.61929	87.9949	1.84072	71.4943	2.4516	2.47737	0.451252
T3G;C32A	0.000559708	6.66e-05	32.9043	2.90523	91.9113	1.40458	59.007	3.22695	3.1667	1.00461
T3G;C32G	0.000176063	9.01e-05	44.1375	5.69855	93.5586	3.41451	49.4211	6.64322	0.726628	0.221145
T3G;C32T	0.000419217	9.31e-05	18.3933	3.21022	91.2848	2.33143	72.8915	3.96751	1.32669	0.291241
T3G;T33A	0.000345492	6.43e-05	36.1499	2.59363	92.3294	1.21353	56.1795	2.86349	1.22886	0.203973
T3G;T33C	0.000122599	8.54e-05	25.873	9.14558	92.7763	5.35839	66.9032	10.5997	0.744167	0.296717
T3G;T33G	0.00665382	0.00458775	70.973	1.35545	90.685	6.75488	19.7119	6.88953	1.3654	0.865724
T3G;C34A	0.000400157	0.00011345	33.4962	4.04652	95.1001	1.98515	61.6039	4.50724	1.18294	0.298578
T3G;C34G	0.000312771	0.000257801	34.8133	6.76808	90.2399	8.1842	55.4266	10.6202	0.620107	0.27125
T3G;C34T	0.000558855	4.82e-05	27.9758	2.11843	87.6761	1.41359	59.7003	2.54676	3.47015	1.09048
T3G;T35A	0.000362035	9.19e-05	26.3282	3.97116	94.5339	2.06514	68.2058	4.47604	1.11304	0.241116
T3G;T35C	0.000377828	0.000149376	40.7462	4.81636	97.8743	3.51199	57.1282	5.96082	0.695207	0.175308
T3G;T35G	0.000802349	0.000284375	43.3723	5.64514	88.941	2.89867	45.5687	6.34586	4.70115	3.55549
T3G;T36A	0.000360169	9.53e-05	23.994	3.80252	89.6769	2.77032	65.6829	4.70466	1.3462	0.376617
T3G;T36C	0.00158415	0.0012927	6.35231	2.02192	61.4542	11.7858	55.1019	11.958	0.680565	0.217648
T3G;T36G	0.000215284	0.000165691	52.1442	6.7085	93.0197	4.64444	40.8755	8.15934	0.758211	0.354288
[truncated: 21,222 more rows]

## Sheet: RepB R Fits
	K	K_SD	Ymin	Ymin_SD	Ymax	Ymax_SD	Amp	Amp_SD	Hill	Hill_SD
WT	0.00381731	0.000247133	9.15174	0.32988	78.5774	1.80449	69.4257	1.8344	1.3271	0.0724384
T1A	0.00410442	0.000447945	8.35848	0.447756	64.1018	2.68943	55.7433	2.72645	1.48239	0.145299
T1C	0.00177556	9.54e-05	16.6397	0.591088	84.9283	1.19228	68.2886	1.33076	1.55862	0.111927
T1G	0.0045283	0.00136211	28.5423	1.5319	76.7853	6.49636	48.243	6.67453	1.42876	0.433234
T2A	0.00134993	8.56e-05	15.8058	0.767333	87.6488	1.35846	71.843	1.56019	1.52821	0.135387
T2C	0.00313435	0.0004636	13.1506	0.768579	79.6258	3.7164	66.4752	3.79504	1.36673	0.179342
T2G	0.00227326	0.000192145	17.4468	0.819079	83.7084	1.86992	66.2615	2.04144	1.52411	0.157265
T3A	0.00109953	0.00012285	13.7335	0.836932	76.142	2.32183	62.4084	2.46807	1.37546	0.187975
T3C	0.00151844	0.000345227	18.3064	1.73077	77.1447	4.62026	58.8384	4.9338	1.43771	0.402318
T3G	0.000790848	5.61e-05	24.8319	1.0674	89.1538	1.07346	64.3219	1.51383	1.66159	0.191447
C4A	0.000256221	0.000112694	18.8713	1.91151	68.3514	4.11119	49.4801	4.53385	0.614013	0.12148
C4G	8.88e-05	3.73e-05	33.7441	2.64951	65.5456	2.13085	31.8016	3.40007	0.862116	0.259068
C4T	0.000921839	0.000237575	13.2636	1.2272	73.4695	4.03744	60.2059	4.21983	0.784072	0.114852
A5C	0.00300726	0.00168048	23.3074	2.24627	72.0443	10.5244	48.7369	10.7614	1.26105	0.596074
A5G	0.00149507	8.99e-05	14.2176	0.561961	79.0043	1.37068	64.7868	1.48141	1.65782	0.140448
A5T	0.000888313	0.000759347	7.25198	1.50626	53.4034	8.76886	46.1515	8.89728	0.62765	0.174471
G6A	3.78e-05	1.36e-05	73.368	1.23508	90.7012	0.750464	17.3332	1.44521	0.597605	0.124289
G6C	7.18e-05	3.49e-05	77.688	1.17496	91.2889	0.911398	13.6008	1.487	0.581803	0.152023
G6T	4.09e-05	1.57e-05	77.8454	1.06682	91.7176	0.631593	13.8722	1.23976	0.607988	0.133434
C7A	9.57e-05	3.48e-05	86.4522	0.666108	94.6421	0.371881	8.18986	0.762886	0.74593	0.163937
C7G	9.19e-05	4.75e-05	87.0282	0.848763	93.6996	0.431921	6.6714	0.952342	0.860159	0.297094
C7T	0.000956528	4.4e-05	32.1946	0.807664	92.9333	0.570414	60.7386	0.988783	1.77805	0.137858
C8A	0.000203723	4.24e-05	42.934	2.79889	96.0455	0.988421	53.1116	2.96829	0.9995	0.141622
C8G	7.52e-05	2.05e-05	88.7664	0.612228	95.8817	0.220016	7.11528	0.650562	1.14702	0.285502
C8T	0.000971055	8.83e-05	26.1147	1.58709	93.5246	1.24546	67.4099	2.01743	1.56757	0.215511
G9A	0.0311635	0.00779274	8.79059	0.132112	100	15.7726	91.2094	15.7732	1.24475	0.0772801
G9C	0.073299	0.530009	8.98457	0.26492	100	921.634	91.0154	921.634	1.80218	1.3963
G9T	0.0185914	0.0697731	7.07824	0.55873	22.1504	76.566	15.0722	76.5681	4	22.375
G10A	0.00702084	0.000915775	11.2875	0.533484	84.1696	4.62451	72.8822	4.65518	1.34026	0.131886
G10C	0.0103059	0.00120724	12.7295	0.291772	74.7525	4.13784	62.0229	4.14812	1.45941	0.119885
G10T	0.0423307	0.103926	7.59173	0.667541	90.0695	149.502	82.4777	149.504	1.21682	0.56776
A11C	0.027892	0.0646889	13.2172	1.04894	73.22	70.1703	60.0028	70.1782	0.937847	0.470421
A11G	0.00041209	5.23e-05	22.3461	1.97844	93.3316	1.33136	70.9855	2.38469	1.01369	0.113214
A11T	0.0324919	0.0906769	7.06227	0.666651	51.2139	73.8795	44.1516	73.8825	1.05969	0.608514
A12C	0.120392	0.764989	9.43966	0.358349	100	478.727	90.5603	478.727	1.10715	0.571591
A12G	0.00333592	0.000417127	10.403	0.487728	76.3965	3.01439	65.9936	3.05359	1.04709	0.0854114
A12T	NA	NA	NA	NA	NA	NA	NA	NA	NA	NA
G13A	5.72e-05	7.64e-06	27.0551	1.73124	80.7162	1.00643	53.6611	2.00252	1.07818	0.13665
G13C	0.0125208	0.00953386	7.22255	0.692586	96.5372	21.5213	89.3146	21.5325	0.647989	0.0949177
G13T	0.00100233	0.000266905	10.6014	1.19408	73.3228	4.44587	62.7214	4.60343	0.771633	0.11069
C14A	0.000780318	0.000773977	16.7017	1.69056	9.71324	2.03565	-6.98846	2.6461	1.51959	2.36785
C14G	0.0693314	1028.81	10.9121	1.1784	100	5.08303e+06	89.0879	5.08303e+06	4	1310.06
C14T	0.0177878	0.0321468	6.11031	0.381183	20.8896	34.4991	14.7793	34.5012	4	12.2625
G15A	2.08e-05	418.611	15.3709	2.72175	5.75044	3.41121	-9.6205	4.36397	8.42e-09	0.0577952
G15C	0.0511943	0.124992	8.59856	0.465279	100	195.336	91.4014	195.336	1.34896	0.557651
G15T	0.0214101	0.0101	6.91313	0.190557	38.2584	16.9112	31.3453	16.9123	2.49818	0.866421
G16A	0.1539	2.45242	4.43179	0.266068	100	1733.69	95.5682	1733.69	1.36008	1.16218
G16C	0.0131542	0.00523616	15.2365	0.729237	27.9097	6.83953	12.6732	6.8783	4	8.50041
G16T	0.0169357	0.0189732	7.15745	0.334281	21.6884	20.1264	14.531	20.1292	4	8.83786
G17A	0.0147264	0.00652905	12.4443	0.74774	45.0515	17.1935	32.6072	17.2098	4	5.67855
G17C	0.0195675	0.037944	36.5769	1.56228	91.2564	50.9186	54.6795	50.9426	0.962404	0.540462
G17T	0.0396964	0.115652	13.4098	1.07352	100	171.222	86.5902	171.225	1.15756	0.684769
A18C	0.112853	1.91949	9.90785	0.264941	100	2080.44	90.0922	2080.44	1.62659	1.7822
A18G	0.153644	3.51179	10.4972	0.29364	100	2479.75	89.5028	2479.75	1.43049	1.68599
A18T	0.016934	0.037648	9.70298	0.20701	14.4317	12.989	4.72871	12.9906	4	17.5939
C19A	0.0116507	0.00146013	16.7282	0.289156	42.1795	2.6671	25.4513	2.68273	2.3974	0.436434
C19G	0.123945	1.27251	14.2081	0.540013	100	731.822	85.7919	731.822	1.10249	0.902292
C19T	0.0186299	0.0125202	7.68601	0.338148	31.7056	14.195	24.0196	14.1991	1.94929	0.846744
G20A	0.0284018	0.0567794	25.6578	1.27356	100	70.7557	74.3422	70.7672	0.886348	0.378098
G20C	0.0165735	0.0159581	18.8628	0.709388	57.1533	19.8546	38.2905	19.8673	1.13933	0.418731
G20T	0.0115633	0.0028738	22.2207	0.46452	51.7167	5.34679	29.496	5.36693	1.91755	0.481388
A21C	0.039806	2.7782	9.8556	0.147307	48.8482	8683.45	38.9926	8683.45	4	46.9853
A21G	0.00199916	0.000178118	15.8573	0.916819	90.9507	2.13748	75.0934	2.3258	1.19892	0.112525
A21T	0.179199	1.28824	10.0618	0.29999	100	491.463	89.9382	491.463	0.980961	0.442591
C22A	0.0197315	0.013934	11.3314	0.49892	55.007	23.5155	43.6756	23.5208	1.61078	0.551251
C22G	0.015931	0.017773	7.39312	0.289756	15.7278	11.0834	8.33467	11.0872	4	10.7674
C22T	0.010903	0.0017882	13.81	0.516402	31.145	2.70549	17.335	2.75433	3.39311	1.6457
C23A	0.0168922	0.020781	4.70502	0.166226	11.3496	10.0807	6.64459	10.0821	4	9.78777
C23G	NA	NA	NA	NA	NA	NA	NA	NA	NA	NA
C23T	0.0168901	0.0103171	5.95775	0.213095	17.2535	6.28027	11.2958	6.28388	2.16072	1.14747
C24A	1.25e-07	2.87e-05	10.9939	3.51291	12.5799	4.84612	1.58604	5.98544	0.372978	20.0552
C24G	0.0129048	0.002663	22.4851	0.678656	42.5291	5.78324	20.044	5.82293	4	4.76776
C24T	0.0181274	0.0182311	22.3345	1.06899	83.4042	35.7433	61.0696	35.7592	1.21873	0.477312
G25A	NA	NA	NA	NA	NA	NA	NA	NA	NA	NA
G25C	0.0663275	1.00786	10.7597	0.378498	100	2251.06	89.2403	2251.06	2.09432	3.48775
G25T	0.0188463	0.0383848	9.39993	0.378089	29.4762	56.2413	20.0763	56.2426	4	11.7176
T26A	0.0053823	0.000588087	11.6973	0.580091	76.9609	3.38156	65.2635	3.43095	1.46387	0.15231
T26C	0.00193151	8.89e-05	12.9324	0.61397	87.8211	1.01392	74.8887	1.18533	1.87036	0.129869
T26G	0.00606098	0.000655847	12.1251	0.485971	69.8658	3.1945	57.7407	3.23126	1.53483	0.162709
T27A	0.00550891	0.000582434	10.8025	0.55192	73.0104	3.25419	62.2079	3.30066	1.5663	0.17242
T27C	0.00167698	0.000129553	15.3481	1.01756	88.1586	1.62474	72.8105	1.91709	1.54055	0.163018
T27G	0.00975859	0.00208424	9.15982	0.200273	26.7166	2.37547	17.5568	2.38389	1.68786	0.316082
T28A	0.00621941	0.000612031	10.3531	0.484128	72.3392	3.21429	61.9861	3.25054	1.63719	0.172934
T28C	0.00616053	0.00056504	9.65856	0.395659	61.8178	2.62247	52.1593	2.65215	1.75065	0.188188
T28G	0.00909875	0.00170994	11.1801	0.244249	29.0472	2.24927	17.8671	2.2625	1.95456	0.411981
T29A	0.00676853	0.000650126	10.3042	0.422283	66.7912	3.0645	56.487	3.09346	1.74261	0.190532
T29C	0.000922216	0.000135701	20.8817	1.87717	92.1882	2.67331	71.3065	3.26655	0.936753	0.134937
T29G	0.00884277	0.00279002	8.5502	0.299871	27.1643	3.43462	18.6141	3.44769	1.55821	0.401928
C30A	0.00945564	0.0010816	9.18409	0.279361	61.2446	3.63221	52.0605	3.64294	1.66564	0.162534
C30G	0.0256659	0.0343483	6.75961	0.38913	41.1757	37.0055	34.4161	37.0076	1.53622	0.734418
C30T	0.00542251	0.000389902	10.8904	0.394844	76.8743	2.30516	65.9839	2.33874	1.53132	0.111374
C31A	0.0147826	0.0082257	7.31736	0.536304	48.8807	17.5617	41.5634	17.5699	1.82588	0.68107
C31G	0.00775642	0.000525828	7.82583	0.188525	70.9311	2.17605	63.1053	2.1842	1.40276	0.0675386
C31T	0.00653793	0.000527668	9.73417	0.379756	74.1506	2.78271	64.4165	2.80851	1.68733	0.146313
C32A	0.00264886	0.00012438	11.3275	0.525183	85.7418	1.17123	74.4143	1.28359	1.84322	0.118019
C32G	0.00106369	4.79e-05	17.9454	0.613018	87.4472	0.919614	69.5017	1.10521	1.62163	0.115122
C32T	0.00281647	0.000156777	11.5339	0.621783	86.9209	1.43071	75.3871	1.55998	1.77557	0.130995
T33A	0.00280275	0.000155267	13.7563	0.620803	88.5771	1.40482	74.8208	1.53587	1.56607	0.106712
T33C	0.00292369	0.000300351	14.4884	0.763716	88.8608	2.70789	74.3725	2.81352	1.13553	0.101157
T33G	0.0108164	0.00666076	15.7172	0.495521	41.4444	8.00901	25.7272	8.02433	1.17062	0.354293
C34A	0.002807	0.000168943	12.9193	0.672677	88.7054	1.55207	75.7861	1.69158	1.61083	0.120851
C34G	0.00228378	0.000226254	15.7174	1.06342	92.0245	2.42276	76.3071	2.64587	1.25874	0.133451
C34T	0.00301084	0.00015179	12.1693	0.501293	87.7593	1.37634	75.5901	1.46479	1.55514	0.0929646
T35A	0.00281504	0.000230893	13.6196	0.835422	88.7421	2.14623	75.1225	2.30309	1.43857	0.132995
T35C	0.00221842	0.000181695	14.2985	0.948238	90.6778	1.96469	76.3793	2.18155	1.34946	0.127342
T35G	0.00340728	0.000333873	10.8832	0.713711	77.0672	2.57428	66.184	2.67139	1.51677	0.161518
T36A	0.00297258	0.00020604	12.5468	0.583091	86.765	1.85971	74.2182	1.94898	1.35018	0.0953504
T36C	0.0714066	0.103203	6.05766	0.329518	100	59.096	93.9423	59.097	0.696548	0.104613
T36G	0.000625381	2.95e-05	16.6547	0.723312	90.8333	0.651471	74.1786	0.973445	1.17768	0.0634614
T37A	0.00306776	0.000156615	11.1322	0.384167	85.415	1.38972	74.2827	1.44184	1.33109	0.0662015
T37C	0.00426857	0.000427567	15.2395	0.694582	86.7953	2.95321	71.5558	3.03379	1.32717	0.123947
T37G	0.000893597	4.9e-05	11.6617	0.817113	91.3689	0.961677	79.7072	1.26194	1.31206	0.095348
C38A	0.0032173	0.000180519	11.1156	0.410622	82.7756	1.53897	71.6599	1.59281	1.4088	0.0795347
C38G	0.00266717	0.000174013	10.5235	0.566782	86.0339	1.71251	75.5104	1.80387	1.37167	0.0947195
C38T	0.00300782	0.000155466	11.2813	0.391646	80.8356	1.36963	69.5543	1.42453	1.4644	0.0798921
A39C	0.00240135	0.000195068	14.9939	0.677152	88.2458	2.03053	73.2519	2.14046	1.17608	0.0907313
A39G	0.00313813	0.000169236	13.2498	0.445932	81.7714	1.40829	68.5215	1.4772	1.51333	0.090587
A39T	0.0042226	0.000419397	10.2146	0.577432	79.4684	2.93565	69.2538	2.9919	1.42719	0.133204
T40A	0.00318943	0.000174371	11.0035	0.409008	84.1719	1.49948	73.1684	1.55426	1.3819	0.0753549
T40C	0.00253172	0.000201396	10.8125	0.609246	87.3876	2.0831	76.5751	2.17037	1.23408	0.0926912
T40G	0.00368471	0.000119819	9.7902	0.231668	73.9929	0.881609	64.2027	0.91154	1.68317	0.0648248
T41A	0.00271922	0.000230647	11.8442	0.735147	90.5332	2.2938	78.689	2.40872	1.23164	0.100993
T41C	0.00326627	0.000287642	12.4709	0.642185	86.1672	2.43613	73.6963	2.51935	1.29552	0.106792
T41G	0.00539565	0.000338398	8.19048	0.272913	54.479	1.5705	46.2885	1.59404	1.87784	0.156944
G42A	0.00371819	0.000196012	11.5636	0.368659	85.9063	1.53611	74.3428	1.57973	1.33944	0.0663028
G42C	0.00304611	0.000278801	12.2084	0.719962	85.8805	2.47926	73.6721	2.58168	1.34097	0.12105
G42T	0.00303451	0.000214172	12.2606	0.546984	86.3522	1.90666	74.0916	1.98356	1.34901	0.0940974
C43A	0.00617145	0.000608809	8.99113	0.406439	63.6803	2.86409	54.6892	2.89279	1.656	0.174065
C43G	0.0106841	0.0012879	7.62444	0.177971	29.5053	2.00234	21.8809	2.01024	2.23498	0.316327
C43T	0.00306327	0.000275928	11.1616	0.643765	84.4637	2.42971	73.3021	2.51355	1.35576	0.11839
G44A	0.0686071	0.266808	7.94263	0.337284	100	377.505	92.0574	377.505	1.4692	0.730189
G44C	0.00457378	0.000607861	13.8024	0.585243	94.3337	3.85647	80.5313	3.90063	0.93615	0.0694917
G44T	0.014906	0.00530976	8.38989	0.42229	100	13.3198	91.6101	13.3265	0.850344	0.0797284
C45A	0.16021	1.21436	7.12227	0.228106	100	641.673	92.8777	641.673	1.14138	0.530139
C45G	0.0479845	0.0545527	6.09341	0.269885	100	79.6337	93.9066	79.6342	1.1919	0.227112
C45T	0.00683517	0.00265886	6.37464	0.744525	100	11.441	93.6254	11.4652	0.719269	0.0827652
G46A	6.07e-05	8.68e-06	31.4219	2.23441	89.5161	0.89133	58.0941	2.40563	1.05672	0.128358
G46C	0.0101823	0.0015735	12.034	0.358438	81.1751	5.51749	69.1411	5.52912	1.24909	0.106669
G46T	0.00860111	0.0119636	34.0024	2.32054	85.2007	26.946	51.1983	27.0458	0.846589	0.444664
G47A	0.006754	0.00309128	34.1877	1.51182	100	11.3805	65.8123	11.4805	0.886643	0.197399
G47C	0.023478	0.0223063	22.1828	0.850731	100	38.9416	77.8172	38.9508	1.02311	0.267599
G47T	0.0187531	0.0123995	25.7627	0.781613	100	24.0165	74.2373	24.0293	0.994851	0.204287
G48A	0.0838805	0.295611	14.6203	0.672152	100	153.031	85.3797	153.033	0.787771	0.29661
G48C	0.0147886	0.00976793	31.0844	0.816638	54.6115	18.4626	23.527	18.4806	4	8.5035
G48T	0.033896	0.0590034	24.6767	0.879583	100	77.3413	75.3233	77.3463	1.05678	0.407964
G49A	0.0291997	0.0255965	10.1651	0.269913	53.2425	28.4445	43.0774	28.4457	1.38258	0.355748
G49C	0.0207074	0.0917071	7.83589	0.379081	24.0012	110.997	16.1653	110.998	4	19.7531
G49T	0.000113212	0.000228904	9.20083	0.948813	8.23274	0.544989	-0.968091	1.09419	4	47.5135
A50C	0.0172788	0.0199929	9.36205	0.191362	19.2503	14.3704	9.88822	14.3716	4	8.58246
A50G	0.0250448	0.0203502	12.9022	0.619363	100	44.5059	87.0978	44.5102	1.20806	0.286138
A50T	0.0579869	42.1022	9.43461	0.201387	100	244917	90.5654	244917	4	126.702
C51A	0.0224945	0.0107413	12.7442	0.410447	81.4183	28.0971	68.674	28.1001	1.74455	0.39303
C51G	0.018597	0.00962087	13.4233	0.347648	40.4316	13.9657	27.0083	13.9701	2.30965	1.0282
C51T	0.0192313	0.0118021	17.338	0.801786	100	33.1178	82.662	33.1275	1.37148	0.353336
G52A	0.0230671	0.0420248	19.7636	1.48959	100	71.1866	80.2364	71.2022	0.946465	0.428931
G52C	0.0306727	0.0590673	15.6237	1.07631	100	109.598	84.3763	109.603	1.22788	0.609902
G52T	0.013814	0.0045822	20.3698	0.770343	45.4711	10.438	25.1013	10.4664	4	5.65713
A53C	0.11967	0.82769	9.54304	0.261421	100	622.743	90.457	622.743	1.27306	0.671217
A53G	0.00675484	0.000676827	9.36625	0.290578	49.6052	2.2835	40.2389	2.30191	1.71727	0.185248
A53T	0.169692	39.4145	9.04979	0.150307	100	41770.8	90.9502	41770.8	2.08735	9.0878
C54A	0.0123386	0.00245604	22.9215	0.387486	48.5389	4.16661	25.6173	4.18459	2.16533	0.532012
C54G	0.0147678	0.00735268	10.4752	0.192734	17.4253	4.12362	6.9501	4.12812	4	6.41323
C54T	0.0170615	0.0326766	9.08656	0.137081	12.8525	8.96347	3.7659	8.96452	4	14.8004
C55A	0.0334057	0.0655943	14.6869	1.05029	100	87.9261	85.3131	87.9324	0.94372	0.370225
C55G	0.0448191	0.652022	48.6829	1.6829	100	850.247	51.3171	850.249	1.76466	5.71562
C55T	0.00577809	0.00158657	11.5559	0.871684	94.1097	8.2368	82.5538	8.28279	0.895106	0.112937
C56A	0.0245063	0.0177248	10.1637	0.572306	100	37.3109	89.8363	37.3152	1.10572	0.217256
C56G	0.0321424	0.028428	6.4022	0.378272	100	75.7627	93.5978	75.7637	1.60793	0.409165
C56T	0.0210086	0.0071986	9.95992	0.332458	100	15.9568	90.0401	15.9603	1.02732	0.0978084
T57A	0.0339359	0.0468216	7.54813	0.679509	100	55.497	92.4519	55.5011	0.778044	0.173631
T57C	0.00204309	0.000144566	10.1087	0.61179	81.7701	1.75087	71.6614	1.85467	1.74703	0.163991
T57G	0.04577	0.0925004	8.59629	0.577952	100	123.341	91.4037	123.343	1.09464	0.376591
G58A	0.00114264	0.000115604	22.5178	1.33553	91.4077	1.84668	68.8899	2.27901	1.04487	0.118401
G58C	0.00284852	0.000694653	16.0245	1.41973	98.4353	6.27319	82.4108	6.43184	0.807582	0.114321
G58T	0.00637262	0.00118143	14.2956	0.626388	94.1629	5.70719	79.8673	5.74146	0.951069	0.0866498
C59A	0.00178698	0.000185234	23.2364	1.30588	92.4784	2.07009	69.242	2.44757	1.27885	0.158579
C59G	0.00176773	0.000294085	11.0531	1.10981	77.5904	3.60688	66.5373	3.77376	1.14097	0.180846
C59T	0.00146171	0.000138437	19.3647	1.20185	94.1907	1.9876	74.826	2.32272	1.10607	0.115216
A60C	0.00542192	0.000514752	10.8355	0.392782	83.5909	2.9103	72.7554	2.93668	1.18382	0.076543
A60G	0.0025203	0.000243535	11.5786	0.650728	82.63	2.4211	71.0514	2.50703	1.25152	0.113715
A60T	0.00771965	0.00139408	9.45108	0.305499	34.9064	2.75321	25.4553	2.77011	1.71192	0.314358
G61A	0.00214991	0.000474313	12.1393	1.22808	92.8246	5.30404	80.6852	5.44436	0.794382	0.101271
G61C	0.00172875	0.000289516	13.0332	1.50651	90.0987	4.03656	77.0655	4.30852	1.0223	0.157116
G61T	0.00209208	0.000256853	15.8875	1.24539	91.9669	2.97639	76.0794	3.22643	1.17311	0.147125
A62C	0.000735289	7.33e-05	16.7438	1.50084	94.9252	1.59653	78.1814	2.19122	1.00758	0.102016
A62G	0.00280161	0.000787513	19.8432	1.34134	96.398	6.38603	76.5548	6.52538	0.716033	0.0981445
A62T	0.00591026	0.00152781	10.884	0.812972	82.5116	7.55829	71.6276	7.60189	1.06316	0.151982
G63A	0.00610161	0.000625917	10.2281	0.555132	70.897	3.45418	60.6689	3.4985	1.80864	0.233854
G63C	0.00492822	0.000420157	10.0012	0.582822	73.3405	2.69433	63.3393	2.75664	1.82176	0.208419
G63T	0.00238569	0.000168311	10.4242	0.872856	93.697	1.69261	83.2729	1.90442	1.52407	0.131609
A64C	0.00533797	0.000523812	9.93941	0.576023	77.6272	3.21064	67.6878	3.2619	1.57461	0.164637
A64G	0.00136206	0.000130129	17.9974	1.26978	94.3708	1.97766	76.3733	2.35021	1.13745	0.1232
A64T	0.00318757	0.000243213	11.1271	0.722522	89.1391	2.16343	78.012	2.28089	1.49756	0.128467
G65A	0.000265097	3.4e-05	16.8244	2.24642	97.066	0.82403	80.2416	2.39278	1.30561	0.139029
G65C	0.000178535	5.21e-06	9.02633	0.504257	94.3516	0.236792	85.3252	0.557087	1.41707	0.0370575
G65T	7.81e-05	3.76e-06	18.4487	1.0711	96.1778	0.241235	77.729	1.09793	1.25306	0.0503972
G66A	3.28e-05	3.27e-06	32.3125	1.84385	94.1341	0.458395	61.8216	1.89997	1.07931	0.0887898
G66C	3.62e-05	2.43e-06	26.962	1.60437	96.2272	0.26743	69.2653	1.62651	1.43986	0.0973542
G66T	2.06e-05	2.81e-06	68.5507	1.11519	95.399	0.256543	26.8483	1.14432	0.949154	0.0961485
C67A	6.35e-05	1.01e-05	32.7104	1.66015	78.5826	1.08042	45.8722	1.98076	1.00052	0.136077
C67G	0.000660058	0.000119101	7.91103	0.933289	61.3026	2.82268	53.3916	2.97297	1.09122	0.168949
C67T	0.000364979	4.91e-05	17.1312	1.1426	77.3633	1.82895	60.2321	2.15652	1.01801	0.108449
T68A	4.32e-05	9.37e-06	37.0395	2.30762	84.1356	1.30023	47.0961	2.64871	0.85643	0.141467
T68C	0.000282735	6.99e-05	23.7018	1.64744	84.6559	2.75074	60.9541	3.20634	0.599492	0.0713614
T68G	0.0012335	0.000154666	6.79517	0.448372	54.9453	2.07977	48.1502	2.12755	1.19698	0.136604
G69A	0.000154348	8.59e-05	71.1404	1.89744	97.166	2.18342	26.0256	2.89267	0.442331	0.105413
G69C	3.58e-05	8.04e-06	71.9504	1.41358	94.8051	0.435748	22.8547	1.47922	0.832261	0.123026
G69T	4.97e-05	1.4e-05	83.2322	1.05635	95.9989	0.329954	12.7668	1.10668	0.929028	0.184624
A70C	7.44e-05	6.91e-06	45.4546	1.3871	96.6389	0.294427	51.1843	1.41801	1.02728	0.0619431
A70G	0.00139542	8.17e-05	17.8953	0.934537	94.639	1.04537	76.7438	1.4022	1.44734	0.115116
A70T	0.000720111	4.06e-05	32.0967	1.07169	96.4189	0.472963	64.3222	1.17142	1.81828	0.159397
A71C	0.000885236	6.25e-05	27.8791	1.29726	96.8722	0.742309	68.9932	1.49463	1.43054	0.133936
A71G	0.000536337	4.51e-05	23.0358	1.48708	97.7664	0.699366	74.7306	1.64332	1.22564	0.106039
A71T	0.00056954	9.87e-05	18.2345	2.69748	98.2111	2.30124	79.9766	3.54572	0.93592	0.141932
A72C	0.00244071	0.000178103	15.881	0.833673	92.5513	1.81383	76.6703	1.99624	1.29324	0.103647
A72G	0.000986617	7.51e-05	19.865	1.33638	97.2399	1.05128	77.3749	1.70032	1.29794	0.120457
A72T	0.00154939	6.9e-05	20.6121	0.718673	94.0292	0.787109	73.4171	1.06585	1.51037	0.0924443
T1A;T2A	0.00228934	0.00063536	10.4499	2.07985	69.191	6.33806	58.7412	6.67059	2.0051	0.769896
T1A;T2C	0.00199838	0.000338533	13.2595	1.49704	76.7114	3.83492	63.4519	4.11676	1.67195	0.372899
T1A;T2G	0.0141213	0.0112046	15.9488	1.44473	89.7748	33.5524	73.826	33.5834	1.2986	0.502168
T1A;T3A	0.00107822	0.000179035	10.976	1.54758	81.2264	3.63237	70.2504	3.94831	1.56076	0.35612
T1A;T3C	0.00143196	0.000529249	22.6373	2.84238	82.2827	7.23895	59.6454	7.77699	1.09922	0.42261
T1A;T3G	0.00116956	0.000291579	17.751	3.22781	92.2566	4.60441	74.5056	5.62311	1.23105	0.398281
T1A;C4A	0.00111715	0.000297724	13.7345	2.2068	70.0992	6.43024	56.3648	6.79838	2.01497	0.993837
T1A;C4G	0.000471408	0.000409364	37.5525	5.07384	53.4095	5.80808	15.8569	7.71218	4	39.0766
T1A;C4T	0.00213524	0.00130365	6.88196	2.31197	89.0073	14.0505	82.1253	14.2394	0.822119	0.25435
T1A;A5C	0.000358009	0.000206903	52.7682	3.96969	81.4311	3.11463	28.6629	5.04572	1.53433	1.14564
T1A;A5G	0.00190078	0.000449688	10.8881	1.9375	80.4599	5.75991	69.5718	6.07704	1.60876	0.478454
T1A;A5T	0.000194078	0.000256429	10.7655	5.20791	52.9711	11.6667	42.2056	12.7763	0.791553	0.620998
T1A;G6A	6.7e-05	3.53e-05	79.7339	2.43006	93.4541	0.870816	13.7202	2.58138	1.17013	0.610304
T1A;G6C	8.1e-05	2.65e-05	63.5896	2.95056	95.3596	0.861655	31.77	3.0738	0.927082	0.19797
T1A;G6T	8.44e-05	2.68e-05	32.8764	4.44985	92.4173	1.76884	59.5409	4.78853	0.856383	0.167423
T1A;C7A	0.000141421	0.00023799	65.4264	7.04053	93.2158	6.68535	27.7893	9.70891	0.514586	0.40799
T1A;C7G	0.000192376	0.000117725	70.3298	2.3058	84.4763	1.48014	14.1464	2.73999	1.60987	1.09988
T1A;C7T	0.000664305	0.000154349	31.9051	3.50576	93.642	2.28989	61.7369	4.18736	1.35267	0.396422
T1A;C8A	0.000177605	3.74e-05	41.4079	2.93407	94.1379	0.978783	52.73	3.09302	1.04714	0.151617
T1A;C8G	1.25e-07	2.16496e+06	79.3382	9.74509	100	1.32138e+08	20.6618	1.32138e+08	7.57e-07	4.77555
T1A;C8T	0.000909524	0.000164363	28.929	3.19764	94.4531	2.18962	65.5241	3.87548	1.537	0.407514
T1A;G9A	0.0067297	0.00127989	8.97157	0.645239	42.0619	4.15097	33.0903	4.20082	2.56875	0.939322
T1A;G9C	0.0172647	0.0411451	10.1193	0.708214	27.6651	52.4721	17.5458	52.4768	4	17.7104
T1A;G9T	2.65e-05	7.69e-05	3.03237	3.89415	8.12942	1.77283	5.09705	4.27871	4	16.2477
T1A;G10A	0.00976241	0.00365991	12.8628	1.03329	89.4264	14.0808	76.5636	14.1186	1.19354	0.247325
T1A;G10C	0.016339	0.0159345	13.2346	1.44969	100	45.7838	86.7654	45.8068	1.14657	0.417599
T1A;G10T	0.0134371	0.0223622	7.92366	1.16183	31.5203	27.3047	23.5966	27.3295	1.63098	1.72666
T1A;A11C	0.0565474	0.333421	11.7867	1.49844	100	317.415	88.2133	317.419	0.976137	0.833995
T1A;A11G	0.000461162	9.42e-05	22.0458	2.83392	87.8301	2.38023	65.7843	3.70089	0.98164	0.180484
T1A;A11T	NA	NA	NA	NA	NA	NA	NA	NA	NA	NA
T1A;A12C	0.0170697	0.0303289	9.56398	1.06506	28.5938	36.7774	19.0298	36.7928	2.83466	6.35005
T1A;A12G	0.00527773	0.00170569	8.99027	0.996242	80.6217	9.63039	71.6315	9.68178	1.10975	0.209168
T1A;A12T	0.000339422	0.00875701	16.8706	3.47391	5.78002	31.0679	-11.0906	31.2615	0.23401	0.837168
T1A;G13A	0.000189693	6.84e-05	10.9838	3.07113	75.5023	4.41417	64.5185	5.37743	0.872622	0.215821
T1A;G13C	0.0252423	0.0645674	7.92638	1.44939	100	112.152	92.0736	112.161	0.889882	0.44828
T1A;G13T	0.00437817	0.00543611	6.95301	2.07365	71.0794	26.1168	64.1263	26.199	0.802249	0.369535
T1A;C14A	0.0703735	2200.98	14.3665	2.13498	100	1.0318e+07	85.6335	1.0318e+07	4	2605.41
T1A;C14G	NA	NA	NA	NA	NA	NA	NA	NA	NA	NA
T1A;C14T	0.0624455	1.42524	5.84771	0.885867	100	3261.64	94.1523	3261.64	1.98915	5.78595
T1A;G15A	1.25e-07	0.000940409	16.5887	5.49391	4.62064	1527.35	-11.9681	1527.35	0.0332124	5.59728
T1A;G15C	0.0207337	0.0335036	5.8194	0.90718	44.5249	67.3424	38.7054	67.3485	2.37064	2.70231
T1A;G15T	0.0321036	0.161187	5.97136	1.07023	48.1351	204.326	42.1637	204.329	1.68922	2.58816
T1A;G16A	NA	NA	NA	NA	NA	NA	NA	NA	NA	NA
T1A;G16C	2.5	3077.39	13.6157	6.88491	32.9152	1185.23	19.2995	1185.25	0.091987	2.72397
T1A;G16T	0.0417397	9.10321	5.77965	1.00216	100	67473.8	94.2203	67473.8	4	125.22
T1A;G17A	0.0169419	0.0403436	7.53368	1.6883	44.2704	107.984	36.7368	107.998	4	18.57
T1A;G17C	0.0370673	0.124786	18.4058	1.34757	100	195.509	81.5942	195.514	1.23179	0.931328
T1A;G17T	0.0324507	0.0783252	5.58352	0.573592	100	310.771	94.4165	310.771	2.30671	1.95748
T1A;A18C	0.179649	11.3015	12.2244	1.94171	100	4588.9	87.7756	4588.9	1.05176	4.0311
T1A;A18G	0.030903	0.290357	13.6883	1.1501	37.6636	254.256	23.9753	254.259	2.00568	6.97703
T1A;A18T	0.673897	35.9263	9.99346	2.0048	100	2130.87	90.0065	2130.87	0.578343	1.22213
T1A;C19A	3.56e-06	107.041	20.6505	7.78115	29.8477	23153.1	9.1972	23153.1	0.000167287	1.12645
T1A;C19G	0.04118	13.3266	13.2367	1.18794	100	91481	86.7633	91481	4	194.291
T1A;C19T	0.0135631	0.00881591	5.89652	1.24125	22.6602	13.8369	16.7637	13.8925	4	10.4782
T1A;G20A	0.025398	0.0846666	17.8524	2.72592	100	242.211	82.1476	242.227	1.71846	2.31834
T1A;G20C	0.0159953	0.0113634	15.4903	0.686137	47.532	17.0226	32.0417	17.0364	1.68976	0.777204
T1A;G20T	0.0147804	0.00997145	29.9964	0.95665	54.9328	19.9963	24.9365	20.0192	4	8.69142
T1A;A21C	0.0618728	465.466	12.5211	1.5303	100	2.48478e+06	87.4789	2.48478e+06	4	1027.99
T1A;A21G	0.00222954	0.00039187	17.9422	1.77044	83.979	3.72414	66.0367	4.12355	1.43706	0.2949
T1A;A21T	0.0573259	0.348077	13.7747	0.729685	100	571.51	86.2253	571.51	1.5781	1.50584
T1A;C22A	0.0788941	0.676825	10.6984	0.882608	100	651.076	89.3016	651.077	1.2086	1.20266
T1A;C22G	0.0164028	0.0590471	6.29005	1.26467	18.4036	52.7843	12.1135	52.7994	4	31.3219
T1A;C22T	0.0907431	1.07791	6.45008	1.09939	100	863.175	93.5499	863.176	1.09481	1.33354
T1A;C23A	0.0307133	0.900135	4.41925	0.564769	51.1089	3505.7	46.6897	3505.7	4	44.7481
T1A;C23G	0.000376351	0.00646126	19.711	5.71998	24.4992	14.3355	4.78816	15.4345	0.438699	2.37559
T1A;C23T	0.0136289	0.0138679	3.63685	1.38026	12.995	11.5417	9.35818	11.624	4	14.7766
T1A;C24A	0.0161598	0.0794448	12.941	1.08142	20.4613	44.3134	7.52031	44.3266	4	45.3704
T1A;C24G	0.011036	0.00685837	19.8506	2.64287	37.9043	11.9185	18.0537	12.208	4	11.2824
T1A;C24T	0.0119844	0.00215256	16.0289	1.38328	50.4514	8.23793	34.4225	8.35326	4	4.36576
T1A;G25A	0.0361948	1.73961	4.27274	0.450866	100	13717	95.7273	13717	4	44.2114
T1A;G25C	0.0424137	1.75987	14.6666	1.36173	100	7511.13	85.3334	7511.13	2.88333	23.7653
T1A;G25T	0.0167559	0.0356428	9.27118	1.21868	33.8447	64.1056	24.5735	64.1171	4	17.2537
T1A;T26A	0.00345466	0.000437018	16.1044	1.14303	79.8892	3.22378	63.7847	3.42041	1.54261	0.234019
T1A;T26C	0.00144403	7.63e-05	20.5033	1.03039	89.359	0.891894	68.8557	1.36279	2.45087	0.285939
T1A;T26G	0.00292574	0.000701063	16.44	1.72041	73.3992	5.07447	56.9592	5.35818	1.44608	0.3757
T1A;T27A	0.00530674	0.00171801	16.7438	1.75919	86.1157	9.932	69.3718	10.0866	1.22578	0.320866
T1A;T27C	0.00137352	0.000136757	18.7322	1.54696	91.6289	1.81892	72.8967	2.38779	1.34679	0.173908
T1A;T27G	0.147563	1.84581	10.6817	2.51365	100	344.016	89.3183	344.025	0.48507	0.444062
T1A;T28A	0.00502891	0.00131705	13.8791	1.64471	80.1007	7.9084	66.2216	8.07761	1.43306	0.375686
T1A;T28C	0.00908049	0.00686833	13.9954	1.79691	89.1544	24.5803	75.159	24.6459	1.0108	0.344216
T1A;T28G	0.0101249	0.00294457	17.8334	1.41361	41.2722	6.46483	23.4388	6.61758	4	3.46254
T1A;T29A	0.00625544	0.00182774	11.8918	1.73737	78.8924	10.4594	67.0005	10.6027	1.63848	0.562115
T1A;T29C	0.00119588	0.000175056	30.5544	1.88919	88.8625	2.16458	58.3082	2.87305	1.14253	0.19983
T1A;T29G	0.00993437	0.0114621	13.4188	1.23331	40.6345	17.6684	27.2157	17.7114	1.38028	1.02074
T1A;C30A	0.00837829	0.00290907	11.3035	1.32894	60.6964	11.2276	49.3929	11.306	2.14519	0.978527
T1A;C30G	0.0613655	0.612438	8.18341	1.26354	100	838.944	91.8166	838.945	1.34502	1.92258
T1A;C30T	0.00557055	0.000774359	16.6616	1.72993	81.8153	5.09525	65.1537	5.38091	2.54968	0.867649
T1A;C31A	0.0101561	0.00476803	9.3776	1.49086	45.2221	13.8746	35.8444	13.9545	3.13107	2.47709
T1A;C31G	0.00433224	0.00098076	9.67228	1.11184	64.2944	5.49911	54.6221	5.61039	1.61077	0.382333
T1A;C31T	0.00629238	0.00206436	12.2456	1.52282	75.6605	10.5619	63.4149	10.6711	1.5535	0.509486
T1A;C32A	0.00164481	0.000101509	14.2998	1.08261	90.4776	1.1759	76.1778	1.59837	1.9323	0.20247
T1A;C32G	0.00123049	0.000269965	10.5432	2.36015	83.2843	5.60734	72.7411	6.08379	1.97777	0.71718
T1A;C32T	0.00226453	0.000150079	15.4361	1.00012	91.6083	1.35314	76.1721	1.68262	1.79286	0.169933
T1A;T33A	0.00197318	0.000289416	17.5569	2.22178	88.9228	2.82663	71.3658	3.5953	1.67459	0.355337
T1A;T33C	0.00296254	0.000689629	16.1831	1.66874	92.944	6.07011	76.7609	6.29531	0.97476	0.17119
T1A;T33G	0.152692	4.40566	23.392	4.42355	100	870.968	76.608	870.979	0.597799	1.36568
T1A;C34A	0.00245035	0.000225585	17.6304	1.58783	89.8835	1.86229	72.2531	2.44731	2.21454	0.344256
T1A;C34G	0.00286121	0.000739748	18.1388	1.66499	78.4526	5.72504	60.3138	5.96224	1.24553	0.293326
T1A;C34T	0.00221721	0.000255211	16.6019	1.66246	90.9092	2.39734	74.3073	2.91737	1.62792	0.254447
T1A;T35A	0.00259571	0.00053432	17.3735	2.12756	93.6349	5.18522	76.2615	5.60473	1.14367	0.235201
T1A;T35C	0.00196476	0.000332147	17.1483	2.14599	92.0035	3.94146	74.8552	4.4878	1.19736	0.230809
T1A;T35G	0.00819081	0.010905	15.4114	2.99749	100	38.5323	84.5886	38.6487	0.751947	0.335173
T1A;T36A	0.00315803	0.000885704	9.76902	1.52656	90.5325	7.78343	80.7635	7.93172	0.980209	0.188071
T1A;T36C	0.00464394	0.0030276	5.09181	0.926229	25.6255	6.33622	20.5337	6.40356	1.45461	0.793397
T1A;T36G	0.000944754	0.000142871	19.6029	2.42374	94.1729	2.42939	74.57	3.43168	1.15585	0.209524
T1A;T37A	0.004005	0.000809176	14.8636	1.6003	88.7436	6.23274	73.88	6.43491	1.37163	0.285139
T1A;T37C	0.00397317	0.000812839	19.3383	1.70373	94.9045	5.96619	75.5661	6.20468	1.13725	0.201182
T1A;T37G	0.00103429	0.000130464	13.44	1.96249	91.9411	2.16215	78.5012	2.91998	1.55076	0.2981
T1A;C38A	0.00192104	0.00037853	10.6172	1.66741	63.271	4.0399	52.6538	4.37047	2.50326	0.897857
T1A;C38G	0.00399537	0.000841295	8.68615	1.24342	81.0854	6.1732	72.3992	6.29718	1.35261	0.255367
T1A;C38T	0.00316736	0.000908511	7.80123	1.47918	77.8964	7.80239	70.0951	7.94136	1.3057	0.332323
T1A;A39C	0.00199489	0.000413507	14.9719	1.98397	87.4602	4.84243	72.4884	5.23309	1.26975	0.28831
T1A;A39G	0.00339958	0.000582301	17.8718	1.66542	78.6999	4.26543	60.8281	4.57903	1.77573	0.424262
T1A;A39T	0.00696189	0.00294726	11.7338	1.33995	100	14.4112	88.2662	14.4733	0.920554	0.179542
T1A;T40A	0.003673	0.00125094	8.79088	1.5164	85.7976	9.5804	77.0067	9.69966	1.05467	0.237249
T1A;T40C	0.00220188	0.000319114	13.5198	1.56438	86.5055	3.45809	72.9857	3.79548	1.48864	0.270557
T1A;T40G	0.00397387	0.00115112	13.2469	2.00046	76.4579	7.81045	63.211	8.06257	1.57815	0.524131
T1A;T41A	0.00312991	0.000689904	11.7322	1.39476	89.2354	5.9489	77.5033	6.11022	0.992601	0.159131
T1A;T41C	0.00349167	0.00123166	13.0247	2.18756	79.3085	9.34427	66.2838	9.59691	1.31835	0.428314
T1A;T41G	0.00510585	0.000597164	11.0881	1.25476	62.0509	4.11486	50.9628	4.30192	3.47674	1.77815
T1A;G42A	0.00400145	0.000454365	13.6001	0.870107	72.6092	3.08741	59.0092	3.20768	1.75823	0.261087
T1A;G42C	0.00347885	0.000575393	14.1535	1.29748	83.567	4.50857	69.4136	4.69156	1.35184	0.224608
T1A;G42T	0.0024617	0.000466111	8.91151	1.23119	71.0766	4.46063	62.1651	4.62742	1.60266	0.340709
T1A;C43A	0.00499665	0.0018718	10.6229	1.61615	54.8362	8.51377	44.2134	8.6658	1.62365	0.715625
T1A;C43G	0.00983205	0.0025788	10.9053	0.859206	34.3764	5.14583	23.4711	5.21707	3.26568	1.62826
T1A;C43T	0.0031403	0.000694848	11.45	1.18007	73.7387	5.23649	62.2887	5.36782	1.32372	0.27362
T1A;G44A	0.0407798	13.1104	8.9463	1.33127	100	94820.7	91.0537	94820.7	4	199.484
T1A;G44C	0.00663282	0.00418676	14.3068	1.84239	92.26	18.7409	77.9532	18.8312	0.922476	0.265102
T1A;G44T	0.0254892	0.0406619	8.8977	1.12385	100	84.4406	91.1023	84.4481	1.11031	0.464624
T1A;C45A	NA	NA	NA	NA	NA	NA	NA	NA	NA	NA
T1A;C45G	0.0178738	0.0583284	6.57686	1.74618	42.1053	80.5617	35.5284	80.5806	1.47496	2.1878
T1A;C45T	0.0162246	0.0342051	3.59981	1.62622	100	78.9415	96.4002	78.9583	0.785005	0.35305
T1A;G46A	0.000108644	4.39e-05	16.7962	3.42958	80.7143	4.09659	63.9181	5.34267	0.63686	0.148161
T1A;G46C	0.0078933	0.00314616	15.907	1.25277	77.18	12.3331	61.2729	12.3966	1.28892	0.356118
T1A;G46T	0.00744795	0.0132038	50.1708	3.34291	100	29.612	49.8292	29.8001	0.736701	0.480558
T1A;G47A	0.0116779	0.0163739	38.5597	3.74627	100	43.6508	61.4403	43.8113	1.15897	0.89706
T1A;G47C	0.0215755	0.0351683	24.27	1.79272	100	79.649	75.73	79.6692	1.30054	0.79827
T1A;G47T	0.0197701	0.0208422	27.9997	1.33468	100	44.0186	72.0003	44.0388	1.18307	0.468173
T1A;G48A	0.0452491	0.416513	17.7221	2.5665	100	603.171	82.2779	603.176	1.29132	2.29247
T1A;G48C	0.0290926	0.480379	29.2761	2.37104	100	2036.12	70.7239	2036.12	3.04954	22.9856
T1A;G48T	0.0263397	0.0695586	29.2589	1.85032	100	173.313	70.7411	173.323	1.78729	2.02847
T1A;G49A	0.0338067	0.142365	13.2629	0.730913	77.0924	374.012	63.8295	374.013	2.30706	3.24575
T1A;G49C	1.25e-07	4.97245	7.70925	2.83163	12.7318	9.44102	5.02252	9.85652	2.13e-08	0.379725
T1A;G49T	2.5	710.73	13.0186	2.71356	0	312.159	-13.0186	312.17	0.144551	1.16793
T1A;A50C	0.00016691	0.000984418	12.6809	3.65391	8.95814	3.30171	-3.72279	4.92467	4	74.2638
T1A;A50G	0.0113088	0.00278238	11.8823	1.12016	36.0441	6.41551	24.1618	6.51256	4	3.81045
T1A;A50T	2.5	5399.21	10.7017	2.16825	18.1932	567.484	7.49154	567.488	0.0666905	2.92041
T1A;C51A	0.0315943	0.22524	10.9692	1.54547	100	953.074	89.0308	953.075	2.54742	6.88939
T1A;C51G	0.0201796	0.0833601	13.3606	0.727894	41.5072	174.192	28.1466	174.194	4	19.7256
T1A;C51T	0.0138959	0.0080053	13.2317	1.97795	52.0169	27.7593	38.7852	27.8297	4	9.40011
T1A;G52A	0.0422494	0.142826	12.7206	1.15453	100	180.774	87.2794	180.777	1.03439	0.621487
T1A;G52C	0.239743	4.89891	10.1765	2.42245	100	685.291	89.8235	685.296	0.544529	0.691942
T1A;G52T	0.0161772	0.0436774	14.5594	2.09918	36.1933	70.2889	21.6338	70.3203	4	24.6731
T1A;A53C	0.0742583	1.14323	11.2468	1.13047	100	1446.76	88.7532	1446.76	1.45219	2.6575
T1A;A53G	0.00682486	0.00175679	10.9739	1.05595	57.9454	7.34361	46.9715	7.41914	1.95319	0.682445
T1A;A53T	1.27e-05	3.71e-05	9.01888	2.94179	14.8959	2.0737	5.87703	3.59922	0.749143	2.03099
T1A;C54A	NA	NA	NA	NA	NA	NA	NA	NA	NA	NA
T1A;C54G	NA	NA	NA	NA	NA	NA	NA	NA	NA	NA
T1A;C54T	0.00940719	0.070494	13.1019	1.86597	18.2301	21.2895	5.12822	21.3711	1.37235	7.08212
T1A;C55A	0.0470973	0.274628	10.5959	1.81147	100	319.184	89.4041	319.19	1.01285	0.968463
T1A;C55G	NA	NA	NA	NA	NA	NA	NA	NA	NA	NA
T1A;C55T	0.00470383	0.00524009	12.9323	2.38565	66.5854	20.0625	53.6531	20.2038	0.805507	0.381531
T1A;C56A	0.0330946	0.106081	12.0772	1.31274	100	279.133	87.9228	279.136	1.7235	1.69509
T1A;C56G	0.014705	0.00723763	5.28167	0.67252	31.9051	15.7489	26.6235	15.7632	4	6.11164
T1A;C56T	0.0291555	0.0972822	10.8292	1.94529	100	158.499	89.1708	158.511	0.982166	0.719533
T1A;T57A	0.00707593	0.0077491	6.23184	1.61742	40.1171	18.4902	33.8853	18.5608	1.27832	0.895031
T1A;T57C	0.0016979	0.000185633	12.5954	1.00776	68.1704	2.61286	55.575	2.80047	3.24756	0.966463
T1A;T57G	0.0178623	0.0463648	10.0393	0.992908	39.4045	98.8215	29.3651	98.8264	4	17.3999
T1A;G58A	0.00245048	0.000878509	22.3704	2.90845	100	8.64871	77.6296	9.12465	0.8287	0.212797
T1A;G58C	0.00705085	0.00427487	20.7755	3.08876	100	21.8031	79.2245	22.0208	1.1557	0.484442
T1A;G58T	0.00540326	0.00175107	20.5844	2.07495	100	10.4064	79.4156	10.6112	1.07399	0.252847
T1A;C59A	0.000958814	0.000147364	34.5709	2.91196	91.8559	1.5508	57.285	3.29917	1.98137	0.531195
T1A;C59G	0.00112832	0.000294904	9.63199	2.21343	71.6192	5.03675	61.9872	5.50165	1.329	0.445537
T1A;C59T	0.00275112	0.00125216	18.2419	2.7713	100	11.562	81.7581	11.8895	0.800873	0.215932
T1A;A60C	0.00528586	0.00207821	13.306	1.83901	74.6479	10.9456	61.3419	11.099	1.32917	0.449501
T1A;A60G	0.00390814	0.000795204	11.6817	1.77586	78.4463	6.15243	66.7645	6.4036	2.09896	0.663589
T1A;A60T	0.00639051	0.00365236	13.0027	1.44037	40.3612	9.10263	27.3585	9.21588	1.83325	1.33001
T1A;G61A	0.00350988	0.00160747	14.0586	2.27146	77.1373	11.3287	63.0787	11.5542	1.2422	0.467121
T1A;G61C	0.00243345	0.000642099	17.1664	2.07428	93.6241	6.73846	76.4578	7.0505	0.914109	0.183086
T1A;G61T	0.00251361	0.000487598	17.8057	1.91784	92.6039	4.91928	74.7982	5.27991	1.22248	0.248277
T1A;A62C	0.000707421	0.000139585	24.556	3.18604	92.5241	2.29187	67.968	3.92473	1.31375	0.322613
T1A;A62G	0.00426426	0.00291955	19.1005	2.19262	91.5335	15.7233	72.433	15.8754	0.758933	0.223659
T1A;A62T	0.00687255	0.00491914	15.8201	2.54356	100	23.551	84.1799	23.688	0.93645	0.331448
T1A;G63A	0.00685297	0.002408	14.4682	1.5197	85.9711	11.9837	71.5029	12.0797	1.26961	0.333768
T1A;G63C	0.00517756	0.000609097	13.5333	1.10819	81.2028	4.10146	67.6695	4.24853	1.9152	0.371882
T1A;G63T	0.00191867	0.000142712	13.1322	1.26225	96.8202	1.27371	83.688	1.79321	1.61528	0.161787
T1A;A64C	0.00446169	0.000592201	12.2624	1.28583	80.16	4.10108	67.8976	4.29793	1.90793	0.404149
T1A;A64G	0.00133215	0.000186878	16.5703	2.07433	91.6122	2.65838	75.0419	3.37192	1.37491	0.250322
T1A;A64T	0.00314303	0.000327679	13.6301	1.30423	90.2461	2.59549	76.616	2.90476	1.69616	0.236785
T1A;G65A	0.000199469	2.32e-05	19.7548	2.26436	97.9688	0.531701	78.214	2.32595	1.15966	0.0935197
T1A;G65C	0.000297361	4.8e-05	8.06956	2.69135	94.7303	1.56627	86.6607	3.11393	1.47745	0.243677
T1A;G65T	0.000104455	2.36e-05	32.0187	5.27038	97.6598	0.876773	65.6411	5.34281	1.50184	0.311729
T1A;G66A	4.39e-05	1.36e-05	43.7405	4.65982	93.5168	1.30544	49.7763	4.83923	1.03894	0.247703
T1A;G66C	2.64e-05	3.22e-06	33.4109	2.96742	96.6262	0.374257	63.2154	2.99093	1.41737	0.152961
T1A;G66T	3.04e-05	1.39e-05	60.7961	3.42645	96.1462	1.31252	35.3501	3.66923	0.625094	0.152598
T1A;C67A	6.08e-05	1.88e-05	37.686	4.58385	73.0771	2.91804	35.3911	5.43384	4	5.14312
T1A;C67G	0.000776369	0.000313249	5.27749	1.29506	43.2505	5.70152	37.973	5.84675	1.37324	0.577268
T1A;C67T	0.000623926	0.000329839	14.0759	2.32531	69.499	7.38928	55.4231	7.74651	0.827783	0.249894
T1A;T68A	7.19e-05	2.04e-05	43.695	3.68848	81.9568	1.91819	38.2618	4.15744	1.57387	0.68964
T1A;T68C	0.000314029	0.000267261	16.5795	4.85099	84.3478	10.3952	67.7683	11.4713	0.573766	0.208102
T1A;T68G	0.0215465	0.088372	1.86277	1.23248	100	124.246	98.1372	124.252	0.583948	0.274918
T1A;G69A	7.53e-05	7.25e-05	62.3392	5.3493	97.8429	4.25975	35.5036	6.83817	0.453916	0.192013
T1A;G69C	3.54e-05	2.26e-05	78.7106	4.40001	95.8815	0.914153	17.1709	4.49397	1.50993	1.09437
T1A;G69T	7.54e-05	6.17e-05	75.9528	4.22721	100	1.16904	24.0472	4.38588	0.590169	0.225781
T1A;A70C	0.000126947	2.17e-05	44.9342	2.57392	97.8333	0.491482	52.8991	2.62042	1.06703	0.110879
T1A;A70G	0.00132354	0.000124101	18.36	1.99513	91.582	1.73606	73.2219	2.6447	2.35834	0.510154
T1A;A70T	0.000846019	7.25e-05	33.764	1.67176	97.9886	0.559929	64.2246	1.76304	1.68089	0.192499
T1A;A71C	0.00110938	0.000128362	28.2687	2.22983	95.8715	1.26642	67.6028	2.56436	1.53271	0.243424
T1A;A71G	0.000656077	6.16e-05	21.8985	1.83928	97.3191	0.738396	75.4206	1.98197	1.51536	0.177658
T1A;A71T	0.00103533	8.22e-05	15.9054	1.35705	97.8265	1.26194	81.9211	1.85313	1.17652	0.110073
T1A;A72C	0.00291148	0.000574256	14.4293	1.84988	94.6133	5.53663	80.184	5.83749	1.14509	0.214889
T1A;A72G	0.00133413	8.13e-05	15.9408	1.05214	95.8002	0.976809	79.8594	1.43567	1.41567	0.110812
T1A;A72T	0.00484331	0.00150531	12.4032	1.66991	89.4584	9.98999	77.0551	10.1286	1.15248	0.272196
T1C;T2A	0.00103048	0.000295453	20.4111	3.0435	91.3267	5.49316	70.9155	6.27994	0.891519	0.222765
T1C;T2C	0.000919353	0.000161647	31.0229	2.35722	86.0228	2.58876	54.9999	3.50117	1.62657	0.457152
T1C;T2G	0.000934596	0.000191521	37.2071	2.86573	95.0061	2.58418	57.7989	3.8588	1.22779	0.318102
T1C;T3A	0.000780056	0.000123475	37.1222	2.48293	86.7621	2.19604	49.6398	3.31474	3.01902	0.963537
T1C;T3C	0.000697732	0.000199768	51.4014	3.41945	87.8126	2.89226	36.4112	4.4786	2.40598	1.32711
T1C;T3G	0.00079052	0.000135654	36.5309	2.91665	89.9221	2.38491	53.3913	3.76758	2.6706	0.898049
T1C;C4A	2.5	5009.15	40.427	12.6752	100	3590.12	59.573	3590.14	0.0579283	2.18735
T1C;C4G	1.25e-07	1.0986	44.8461	13.9199	100	230.963	55.1539	231.382	9.34e-07	0.113828
T1C;C4T	0.000258079	0.000755479	36.7049	8.33669	87.2098	23.3312	50.5049	24.7759	0.399622	0.361724
T1C;A5C	0.000182691	0.00041723	44.1616	8.78379	91.5232	16.2693	47.3616	18.4891	0.39973	0.309962
T1C;A5G	0.000135838	0.000109121	45.8265	5.83449	92.2838	5.27343	46.4572	7.8645	0.545337	0.217108
T1C;A5T	0.000104392	5.69e-05	8.7956	4.76184	38.575	6.70601	29.7794	8.2247	4	6.09027
T1C;G6A	0.00295709	0.0110013	83.7889	1.88343	100	10.4841	16.2111	10.652	0.365049	0.256976
T1C;G6C	2.48e-05	7.6e-05	77.8112	5.41748	95.8806	8.11595	18.0695	9.75796	0.336124	0.492661
T1C;G6T	6.15e-06	1.01e-05	75.2268	3.40283	88.34	1.2458	13.1132	3.62371	0.804102	1.00566
T1C;C7A	0.000139718	0.000245797	87.065	2.67629	94.2455	1.8494	7.18053	3.25313	0.7508	0.821116
T1C;C7G	6.84e-05	5.2e-05	88.2209	1.44368	96.3437	0.706834	8.12281	1.60743	0.731007	0.345477
T1C;C7T	0.000705604	0.000123944	64.1513	1.83278	92.14	1.1135	27.9887	2.14451	2.52334	0.839701
T1C;C8A	0.000110622	7.19e-05	62.0699	5.52012	96.5959	1.9155	34.526	5.84301	0.77232	0.261201
T1C;C8G	5.9e-05	4.98e-05	92.6709	1.61526	96.5931	0.597876	3.92225	1.72235	2.11393	4.30945
T1C;C8T	0.000657418	8.31e-05	45.6003	2.02052	94.4571	1.04614	48.8568	2.27528	1.84214	0.367393
T1C;G9A	0.00696639	0.00276271	11.2107	1.13047	81.9036	12.3427	70.6929	12.3943	1.15401	0.258213
T1C;G9C	0.0409805	0.1226	14.8973	0.70322	84.9963	192.724	70.099	192.725	1.50422	1.03625
T1C;G9T	0.0158575	0.0201051	13.0735	1.93656	100	64.6683	86.9265	64.6973	1.30414	0.705336
T1C;G10A	0.00342555	0.000749747	17.919	1.53372	93.7501	6.18354	75.8311	6.37091	1.07763	0.185183
T1C;G10C	0.00852577	0.00439593	16.6948	2.30371	92.1364	20.8555	75.4416	20.9823	1.5099	0.651629
T1C;G10T	0.00702575	0.00319926	12.7406	2.10686	65.829	15.1401	53.0884	15.2859	2.04767	1.32727
T1C;A11C	0.0223326	0.0562194	13.0352	2.45251	100	159.389	86.9648	159.408	1.45661	1.3509
T1C;A11G	0.000147084	4.57e-05	33.1093	4.56452	94.8026	1.78924	61.6933	4.90267	0.988005	0.206966
T1C;A11T	0.0252836	0.0932145	12.622	2.35947	100	139.819	87.378	139.839	0.820104	0.583122
T1C;A12C	0.0283005	0.0804003	11.3933	1.87367	100	216.502	88.6067	216.51	1.59083	1.53137
T1C;A12G	0.00137412	7.44e-05	26.3519	0.977712	86.1495	1.08383	59.7976	1.45966	2.37299	0.318685
T1C;A12T	NA	NA	NA	NA	NA	NA	NA	NA	NA	NA
T1C;G13A	4.84e-05	1.16e-05	74.0561	1.90918	89.8035	0.682728	15.7474	2.02758	2.28357	1.46017
T1C;G13C	0.000843902	9.3e-05	29.3553	1.30581	82.4529	1.67811	53.0976	2.12631	1.61175	0.288522
T1C;G13T	0.000293134	7.35e-05	37.6964	2.65247	89.2883	2.17979	51.5919	3.43323	0.922002	0.175543
T1C;C14A	NA	NA	NA	NA	NA	NA	NA	NA	NA	NA
T1C;C14G	NA	NA	NA	NA	NA	NA	NA	NA	NA	NA
T1C;C14T	0.0299374	0.152623	21.4369	2.24857	100	455.396	78.5631	455.402	2.04712	4.02534
T1C;G15A	NA	NA	NA	NA	NA	NA	NA	NA	NA	NA
T1C;G15C	0.0121813	0.00208663	23.9088	1.51985	65.0174	9.93191	41.1086	10.0475	4	4.34734
T1C;G15T	0.0234029	0.0759821	20.1074	2.60146	100	132.38	79.8926	132.405	0.995112	0.830196
T1C;G16A	NA	NA	NA	NA	NA	NA	NA	NA	NA	NA
T1C;G16C	0.0160608	0.0344803	25.2885	1.5025	48.5159	59.6174	23.2275	59.6363	4	20.194
T1C;G16T	0.0422359	0.864819	19.9433	2.23941	100	2398.34	80.0567	2398.34	2.18702	10.405
T1C;G17A	0.0348427	0.169372	25.5988	2.2816	100	219.282	74.4012	219.294	1.07928	1.15703
T1C;G17C	0.00256368	0.00193355	42.8998	3.15351	75.9242	9.10079	33.0244	9.63167	1.22529	0.914271
T1C;G17T	0.0196264	0.0582663	22.08	2.97169	100	112.882	77.92	112.921	0.983119	0.836958
T1C;A18C	0.00176436	47203.9	14.9123	6.15641	18.2381	7.70369	3.3258	9.86145	5.55e-08	0.774987
T1C;A18G	0.0997446	3.98476	16.7182	1.98254	100	3378.9	83.2818	3378.9	1.33056	4.75838
T1C;A18T	1.76e-06	91.8602	5.42167	3.35505	15.8199	387.011	10.3982	387.025	1.4e-06	0.263635
T1C;C19A	0.0203682	0.0260676	34.7482	1.62946	100	60.7067	65.2518	60.7286	1.51666	0.933621
T1C;C19G	0.0132044	0.00516702	17.6514	0.795674	33.3701	8.41494	15.7187	8.45247	4	8.21704
T1C;C19T	0.0466238	0.266842	19.2256	0.897293	100	516.201	80.7744	516.201	1.70253	1.9573
T1C;G20A	0.000899397	0.000159881	53.8385	0.941442	74.1386	1.148	20.3001	1.48466	1.65968	0.49094
T1C;G20C	2.4e-05	543.76	11.9048	6.81933	25.3751	30.5405	13.4704	31.2925	1.76e-07	0.347508
T1C;G20T	0.0174096	0.0239831	47.2785	1.48532	100	37.2692	52.7215	37.2987	1.06481	0.533214
T1C;A21C	8.98e-06	7016597915	10.9677	3.76289	17.9081	1.86372e+08	6.94035	1.86372e+08	9.33e-08	2.56451
T1C;A21G	0.00116178	0.000111859	32.4375	1.64534	91.2731	1.44229	58.8356	2.188	1.9068	0.333886
T1C;A21T	0.0314426	0.0622185	15.8299	0.971265	100	165.613	84.1701	165.616	1.76296	1.14957
T1C;C22A	0.0273928	0.0886825	24.1107	2.13893	100	152.859	75.8893	152.874	1.17185	1.0397
T1C;C22G	0.000677157	0.00187516	11.9834	1.78847	14.2073	2.18197	2.22386	2.82128	4	29.1012
T1C;C22T	0.0123352	0.00871726	10.7976	2.46424	27.2825	15.7432	16.4849	15.9349	4	14.029
T1C;C23A	0.031633	2.33516	19.8513	1.94643	100	15626.8	80.1487	15626.8	4	103.265
T1C;C23G	NA	NA	NA	NA	NA	NA	NA	NA	NA	NA
T1C;C23T	0.018232	0.0466375	12.7113	1.30713	40.4259	50.7297	27.7146	50.7465	1.5375	1.92439
T1C;C24A	2.5	1433.1	26.9266	5.84298	64.9554	1048.86	38.0288	1048.87	0.0889449	1.20076
T1C;C24G	0.00976749	0.00457184	50.4014	2.06877	68.5498	6.4547	18.1484	6.77813	4	6.01346
T1C;C24T	0.0054112	0.00319745	42.4721	2.05886	84.9799	10.9327	42.5077	11.1249	1.19067	0.546903
T1C;G25A	0.0175228	0.0228123	10.7561	0.640313	42.7182	52.9787	31.9621	52.9825	4	9.24293
T1C;G25C	0.0143803	0.00558174	15.1993	0.68944	41.4074	12.2191	26.2081	12.2385	4	5.51688
T1C;G25T	0.0275863	0.0864132	18.3812	2.08984	100	204.733	81.6188	204.744	1.50251	1.53791
T1C;T26A	0.00217192	0.000258264	21.4315	1.7277	90.7902	2.35519	69.3587	2.92094	1.61563	0.26447
T1C;T26C	0.000880337	9.7e-05	21.7296	2.14701	93.2107	1.38391	71.4811	2.55438	1.82176	0.340534
T1C;T26G	0.00278709	0.000291684	23.3935	1.27088	90.4289	2.27981	67.0354	2.61011	1.47588	0.190302
T1C;T27A	0.00283214	0.000442429	15.7048	1.87398	92.7899	4.08504	77.085	4.49437	1.39011	0.252234
T1C;T27C	0.000712127	6.52e-05	30.5892	1.55254	96.5898	0.917602	66.0006	1.80343	1.2031	0.123954
T1C;T27G	0.00545324	0.00283012	13.855	1.25682	52.3301	8.9312	38.4751	9.0192	1.24693	0.469536
T1C;T28A	0.00385687	0.000530383	18.2164	1.53325	92.1781	4.0535	73.9617	4.33379	1.45767	0.234376
T1C;T28C	0.00302306	0.000601229	17.4811	2.20069	85.5435	4.78632	68.0625	5.268	1.55102	0.376424
T1C;T28G	0.00653531	0.00329889	27.365	2.09213	65.4805	11.1446	38.1155	11.3393	1.76633	1.1276
T1C;T29A	0.00387681	0.000449504	18.1604	1.63583	86.9161	3.1643	68.7557	3.56213	2.14489	0.461789
T1C;T29C	0.000598189	0.000189941	51.0359	4.01823	94.6553	2.06165	43.6194	4.51625	1.51429	0.618501
T1C;T29G	0.00405773	0.00064566	12.643	1.45424	70.0139	4.37637	57.3708	4.61166	2.03077	0.538021
T1C;C30A	0.00544844	0.00148735	12.3345	1.68819	87.4341	9.66241	75.0996	9.80878	1.5013	0.416646
T1C;C30G	0.00457947	0.000829747	13.6173	2.04645	83.6244	6.12995	70.0072	6.46253	2.24573	0.831763
T1C;C30T	0.0022638	0.000203998	16.7008	1.17405	87.6273	1.93376	70.9264	2.26227	1.59054	0.188852
T1C;C31A	0.0135979	0.0114741	10.8925	1.42177	95.4374	38.6193	84.5449	38.6455	1.22248	0.433037
T1C;C31G	0.00516054	0.00118714	12.4774	1.95863	80.2913	7.40167	67.8138	7.65644	1.92145	0.64137
T1C;C31T	0.00299697	0.000183046	14.4326	0.669276	83.4299	1.51717	68.9973	1.65823	1.83537	0.15374
T1C;C32A	0.00128045	0.000156713	15.774	2.23455	92.6353	2.05587	76.8613	3.03641	1.84688	0.392464
T1C;C32G	0.000856756	7.79e-05	29.3967	1.48035	89.6356	1.35481	60.2389	2.00673	1.8518	0.294881
T1C;C32T	0.0014942	8.86e-05	16.7762	1.09375	90.8059	1.16478	74.0297	1.59781	2.16747	0.258402
T1C;T33A	0.00118015	0.000105704	24.1723	1.61422	95.1237	1.2302	70.9514	2.02956	1.57528	0.205558
T1C;T33C	0.00122618	0.000290277	30.6342	3.14985	96.1919	4.06211	65.5577	5.14026	0.990958	0.243303
T1C;T33G	0.00609675	0.00148393	40.1647	1.44621	69.4603	4.44549	29.2957	4.67482	2.74217	1.70774
T1C;C34A	0.00145687	9.41e-05	21.5853	1.58818	95.4854	0.934675	73.9001	1.8428	2.55097	0.357389
T1C;C34G	0.000952246	0.000106597	32.8275	2.00482	96.4001	1.12503	63.5725	2.29892	1.53908	0.246563
T1C;C34T	0.00141543	0.000110099	21.6046	1.44942	93.2715	1.25609	71.6668	1.91796	1.75435	0.212303
T1C;T35A	0.00128539	0.000110227	28.8108	1.75875	92.9295	1.18282	64.1186	2.1195	2.21042	0.396541
T1C;T35C	0.000962462	0.000194527	25.4572	3.2364	99.4163	3.10488	73.9592	4.48493	0.960515	0.193091
T1C;T35G	0.001581	0.000240108	19.3284	2.31557	92.8545	2.87401	73.5261	3.69077	1.47204	0.301093
T1C;T36A	0.00106485	0.000274627	19.4503	3.95106	94.4811	4.38048	75.0308	5.89911	1.26555	0.407377
T1C;T36C	0.00354184	0.00841337	6.15188	2.55888	61.5681	29.4857	55.4162	29.5965	0.499782	0.240657
T1C;T36G	0.000275643	9.03e-05	38.4395	4.43469	91.5655	2.06603	53.126	4.89233	1.20528	0.344301
T1C;T37A	0.00133822	0.000214825	18.2655	1.82708	89.47	3.49801	71.2045	3.94643	1.17623	0.214743
T1C;T37C	0.00112313	0.00025161	32.8982	3.41032	92.0223	3.04252	59.1241	4.57026	1.47214	0.514055
T1C;T37G	0.000541449	8.1e-05	29.3223	2.64119	94.5162	1.31921	65.1939	2.95232	1.568	0.319263
T1C;C38A	0.00125624	0.000161814	18.8689	1.88656	85.8235	2.51352	66.9546	3.14275	1.75397	0.375559
T1C;C38G	0.00132925	0.000152939	21.524	1.65046	91.7861	2.16318	70.2621	2.72091	1.30343	0.193017
T1C;C38T	0.00196541	0.000377065	18.0013	2.18585	93.1156	4.60319	75.1143	5.09581	1.23097	0.260173
T1C;A39C	0.00115322	0.000225343	27.5828	2.53753	94.3328	3.69381	66.7501	4.48144	0.939882	0.187714
T1C;A39G	0.00196303	0.000273448	19.8429	1.3331	92.4568	3.24867	72.614	3.51156	1.08933	0.148679
T1C;A39T	0.00156819	0.000278998	22.1223	2.43784	86.8404	3.4628	64.7181	4.23486	1.59673	0.446027
T1C;T40A	0.00119297	0.000133359	19.3865	1.97418	90.8925	2.11784	71.506	2.89528	1.89739	0.394787
T1C;T40C	0.000888056	0.000151856	19.54	2.58107	95.6237	3.14666	76.0837	4.06982	0.966905	0.172667
T1C;T40G	0.00197262	0.000257606	13.9234	1.59474	89.7039	3.13403	75.7805	3.51644	1.51885	0.258129
T1C;T41A	0.00140763	0.00021006	30.1854	2.41748	90.8541	2.41243	60.6687	3.41526	1.76718	0.455677
T1C;T41C	0.00172818	0.000247025	25.5829	1.81624	87.7836	2.70077	62.2007	3.25468	1.61852	0.328913
T1C;T41G	0.0037533	0.000550556	12.7824	1.37492	72.9779	4.08226	60.1955	4.30758	2.15141	0.518606
T1C;G42A	0.00183125	0.000345922	19.517	2.32486	90.013	3.9719	70.496	4.60227	1.38287	0.326492
T1C;G42C	0.00127652	0.00012108	20.4977	1.27909	90.4886	1.89774	69.9908	2.28856	1.25469	0.149869
T1C;G42T	0.00126085	0.000147143	22.3397	1.73982	89.5034	2.18276	67.1637	2.7913	1.5642	0.281847
T1C;C43A	0.00251888	0.000190288	12.1899	0.718575	82.677	1.8796	70.4871	2.01227	1.4929	0.132474
T1C;C43G	0.0280694	0.0370034	11.614	0.897708	100	69.0866	88.386	69.0925	1.10508	0.366998
T1C;C43T	0.00165795	0.00030511	24.0641	2.5462	89.9055	3.67933	65.8414	4.47444	1.70893	0.492747
T1C;G44A	0.0543344	0.540336	11.217	2.52984	100	561.7	88.783	561.706	1.02036	1.56118
T1C;G44C	0.00148803	0.00033106	29.6795	2.44764	95.1223	4.45868	65.4428	5.08633	0.973123	0.213038
T1C;G44T	0.00486912	0.0021967	17.545	1.73251	94.6688	12.2163	77.1238	12.3385	0.885597	0.200099
T1C;C45A	0.0823239	0.652978	8.78342	1.45258	62.759	129.853	53.9756	129.861	0.501348	0.355413
T1C;C45G	0.0209748	0.0265535	16.2027	1.45362	100	73.3913	83.7973	73.4057	1.42175	0.747541
T1C;C45T	0.000904999	0.000696209	15.4966	3.77567	92.1368	12.0931	76.6402	12.6688	0.525217	0.146812
T1C;G46A	1.87e-05	3.5e-06	64.2624	2.37933	90.6716	0.532	26.4092	2.43808	3.24527	1.05516
T1C;G46C	0.00325374	0.000759767	19.4263	1.42848	83.3712	5.62183	63.945	5.80048	1.11469	0.218886
T1C;G46T	0.0182694	0.168829	77.6062	2.81154	100	60.3847	22.3938	60.4501	0.570593	0.963805
T1C;G47A	0.00584254	0.0203776	50.9331	4.94896	100	38.4042	49.0669	38.7218	0.464483	0.35626
T1C;G47C	0.00687266	0.00135856	39.2267	1.55712	75.5375	4.28009	36.3109	4.55453	3.4453	1.56515
T1C;G47T	0.00541825	0.00101533	51.4784	1.03213	82.1794	3.15026	30.7011	3.31503	1.90432	0.598816
T1C;G48A	0.383121	16.773	23.5984	6.3865	100	504.257	76.4016	504.297	0.249286	0.477774
T1C;G48C	NA	NA	NA	NA	NA	NA	NA	NA	NA	NA
T1C;G48T	0.0226758	0.0448025	44.0713	1.58226	100	75.4344	55.9287	75.451	1.37498	1.07184
T1C;G49A	0.0132955	0.00615777	21.1333	1.7308	48.9306	16.9676	27.7972	17.0557	4	9.31358
T1C;G49C	0.0133529	0.00875046	11.5454	1.88195	35.831	20.3252	24.2856	20.4121	4	11.898
T1C;G49T	2.42e-05	0.00016285	10.076	2.89078	11.7124	1.18443	1.63633	3.12402	4	37.2345
T1C;A50C	2.5	380.784	12.7712	1.8492	96.962	5950.67	84.1908	5950.67	0.551258	1.86379
T1C;A50G	0.00633825	0.00559646	31.9558	3.44391	80.2333	20.5162	48.2775	20.8033	1.36524	1.03
T1C;A50T	0.00026446	0.000435039	10.6052	0.907972	14.4451	0.882537	3.83987	1.26621	4	9.56239
T1C;C51A	0.0218142	0.0495122	47.52	1.57235	100	133.943	52.48	133.952	2.43713	4.03145
T1C;C51G	0.0169794	0.0428421	38.301	1.40288	68.7108	94.9137	30.4098	94.924	4	19.8084
T1C;C51T	0.0100512	0.0189485	43.1209	3.95796	100	46.8352	56.8791	47.0021	1.00641	0.877395
T1C;G52A	0.00601271	0.0224882	44.1087	6.1083	100	52.2779	55.8913	52.6335	0.534009	0.500193
T1C;G52C	0.0124913	0.0328361	43.1499	3.3259	100	56.7557	56.8501	56.8531	0.804413	0.642896
T1C;G52T	0.0206565	0.069446	46.3651	2.7452	100	195.647	53.6349	195.666	2.42193	6.57332
T1C;A53C	0.0234102	0.0222638	13.457	0.549322	60.9223	41.5956	47.4653	41.5992	1.85114	0.858126
T1C;A53G	0.00470213	0.00225924	13.0572	1.88726	80.7684	13.0755	67.7113	13.211	1.10499	0.334693
T1C;A53T	0.0371843	0.997784	12.6503	1.01037	25.2034	394.34	12.553	394.341	1.91856	14.5046
T1C;C54A	0.00777692	0.00237732	25.2782	1.32624	49.9763	4.88544	24.6981	5.06226	3.43574	2.02454
T1C;C54G	0.0135169	0.0221405	45.3516	2.39316	58.1982	27.5792	12.8466	27.6828	4	32.2571
T1C;C54T	2.5	278.586	11.8807	1.65146	36.7719	765.248	24.8913	765.25	0.372166	1.30312
T1C;C55A	0.00914439	0.00648463	28.9032	2.39762	77.8403	20.5807	48.9371	20.7199	1.54343	0.98579
T1C;C55G	0.00187068	0.00810977	64.7808	3.8245	72.9583	11.3569	8.17758	11.9835	0.852394	2.7823
T1C;C55T	0.00232136	0.00151027	25.9383	3.96164	100	13.9362	74.0617	14.4884	0.709007	0.253908
T1C;C56A	0.0113789	0.0168141	22.6408	3.62695	100	55.7313	77.3592	55.8492	1.13209	0.824081
T1C;C56G	0.0140482	0.00998846	16.8768	2.04432	100	42.0984	83.1232	42.148	1.7927	0.975554
T1C;C56T	0.00696938	0.00495049	14.1113	1.86852	100	21.1816	85.8887	21.2638	0.809413	0.21958
T1C;T57A	0.00242994	0.00232042	12.1852	3.14643	71.9218	16.1706	59.7366	16.4739	0.689715	0.281611
T1C;T57C	0.00135104	0.000131356	16.8588	1.47028	92.0981	1.98662	75.2393	2.47151	1.82565	0.301452
T1C;T57G	0.00720639	0.0165586	15.2286	3.45744	80.6696	42.7871	65.441	42.9265	0.610166	0.360846
T1C;G58A	0.000624277	0.000156003	36.7557	3.15944	92.1118	2.6971	55.356	4.15408	1.03583	0.274859
T1C;G58C	0.000658757	0.000299825	38.8303	5.11463	92.8334	5.48766	54.0031	7.50159	0.835571	0.344524
T1C;G58T	0.00255719	0.00099359	33.182	2.68723	97.6402	8.17189	64.4582	8.60239	0.850632	0.235068
T1C;C59A	0.000772477	0.000185316	34.1375	3.58951	95.7197	2.46678	61.5822	4.35541	1.22271	0.347731
T1C;C59G	0.000893349	0.000185973	24.7152	3.04516	85.6412	3.51141	60.926	4.6479	1.8014	0.633907
T1C;C59T	0.000381256	0.000100057	30.4264	3.80793	98.5933	2.71052	68.1669	4.67411	0.784091	0.147749
T1C;A60C	0.00290218	0.000707718	19.9651	1.89841	93.8023	6.37911	73.8373	6.6556	1.06268	0.223001
T1C;A60G	0.0011064	0.000195093	21.0691	2.48103	82.7377	3.22141	61.6687	4.06608	1.94643	0.640859
T1C;A60T	0.00561668	0.00215826	9.84603	1.20865	77.0251	10.8227	67.1791	10.8899	1.1091	0.251158
T1C;G61A	0.000676515	0.000280578	24.2158	3.84607	93.6956	6.5243	69.4798	7.57355	0.66401	0.169718
T1C;G61C	0.000409825	0.000131295	19.1438	3.19926	97.1774	4.69158	78.0335	5.67857	0.588167	0.100733
T1C;G61T	0.00123705	0.000227166	31.096	2.60737	92.4888	2.8863	61.3928	3.88961	1.43165	0.38302
T1C;A62C	0.000472028	5.65e-05	42.4011	1.87629	96.9606	0.628097	54.5595	1.97863	1.38123	0.178732
T1C;A62G	0.00159888	0.00262641	43.24	7.27387	100	21.8055	56.76	22.9867	0.517026	0.333709
T1C;A62T	0.00234528	0.00176636	21.8526	4.00028	100	16.5796	78.1474	17.0553	0.666399	0.238651
T1C;G63A	0.00332263	0.000324653	15.7382	1.34915	86.0798	2.42288	70.3416	2.77318	2.22538	0.370715
T1C;G63C	0.00261619	0.00026572	14.0829	1.4286	86.3538	2.35754	72.2709	2.75661	1.98398	0.302673
T1C;G63T	0.000865514	8.43e-05	13.8395	1.9184	96.9326	1.05062	83.0931	2.18725	1.69713	0.24253
T1C;A64C	0.00194771	0.000249964	12.6446	1.31398	86.8429	2.99253	74.1983	3.2683	1.24922	0.17927
T1C;A64G	0.000665575	0.000130793	36.5977	2.85866	95.0199	1.9909	58.4222	3.48363	1.17863	0.258081
T1C;A64T	0.00129107	0.000225376	14.1447	2.84083	93.8166	3.26331	79.6719	4.3266	1.45091	0.360189
T1C;G65A	4.85e-05	8.68e-06	40.8623	3.27669	97.045	0.509786	56.1827	3.31611	1.01787	0.121752
T1C;G65C	9.02e-05	2.02e-05	21.9999	6.21548	96.6306	1.13264	74.6306	6.31784	1.98862	0.588993
T1C;G65T	3.36e-05	7.19e-06	37.327	4.51323	96.2888	0.639991	58.9618	4.55838	1.24029	0.223374
T1C;G66A	1.95e-05	2.47e-06	67.9955	1.44115	94.0676	0.260614	26.0721	1.46452	1.53514	0.185775
T1C;G66C	0.000128123	1.01e-05	14.117	1.6015	94.3131	0.560019	80.1961	1.6966	1.43862	0.104426
T1C;G66T	3.93e-05	1.94e-05	85.2727	1.77462	96.4572	0.501246	11.1845	1.84405	1.02168	0.394934
T1C;C67A	0.000122111	0.000155662	76.0239	6.38449	96.8372	2.66851	20.8133	6.91973	0.756419	0.564692
T1C;C67G	0.000505223	9.02e-05	24.8836	2.54161	87.6761	2.42481	62.7925	3.51276	1.74295	0.479782
T1C;C67T	0.000149568	5.08e-05	57.6219	3.04218	93.2694	1.42047	35.6474	3.35747	1.09473	0.291052
T1C;T68A	0.000104045	4.09e-05	77.3592	1.76524	98.1648	0.869339	20.8056	1.96769	0.661672	0.140766
T1C;T68C	2.46e-05	1.71e-05	52.0005	3.91438	100	4.3789	47.9995	5.87343	0.355665	0.1208
T1C;T68G	0.000738628	0.000100097	16.6747	2.22377	87.7708	2.89413	71.0961	3.64982	2.06824	0.532557
T1C;G69A	6.7e-05	5.3e-05	87.8292	1.84446	97.576	0.779264	9.74678	2.00232	0.736752	0.341632
T1C;G69C	6.99e-05	0.000151618	92.7031	2.18052	98.3985	1.70857	5.69545	2.77018	0.529152	0.655371
T1C;G69T	2.36e-05	1.45e-05	90.1765	1.92303	97.8138	0.378808	7.63733	1.95998	1.50578	0.861916
T1C;A70C	3.68e-05	1.21e-05	79.1922	2.18602	97.3704	0.394938	18.1782	2.22141	1.22416	0.367419
T1C;A70G	0.000666925	0.000104264	36.5651	3.11927	94.6598	1.52291	58.0947	3.47118	2.3286	0.637535
T1C;A70T	0.00045805	4.65e-05	60.2996	1.16718	97.5757	0.354456	37.2761	1.21981	1.89846	0.265342
T1C;A71C	0.000399464	5.41e-05	38.6817	2.02586	97.6274	0.686363	58.9456	2.13897	1.20466	0.146126
T1C;A71G	0.0004182	6.49e-05	39.7425	2.38269	99.2217	0.719761	59.4792	2.48903	1.12031	0.14206
T1C;A71T	0.000363168	4.39e-05	21.7617	1.99986	95.1918	1.02163	73.4301	2.24569	1.06021	0.107057
T1C;A72C	0.00114171	0.000278184	19.486	3.29377	94.5909	4.46955	75.1048	5.55209	1.05767	0.266605
T1C;A72G	0.00656546	0.00295649	10.8512	1.1883	100	13.4818	89.1488	13.5341	0.778691	0.128935
T1C;A72T	0.00145785	0.000104569	28.3578	1.39018	97.4171	0.864243	69.0593	1.63692	1.63225	0.168128
T1G;T2A	0.00118165	0.000193964	26.5022	2.28797	91.5088	2.67684	65.0065	3.5214	1.27526	0.271414
T1G;T2C	0.00159565	0.000311544	34.7383	2.24685	87.7211	3.22804	52.9828	3.93301	1.55035	0.452539
T1G;T2G	0.00366545	0.00146248	16.8568	2.8104	68.8643	9.21786	52.0075	9.63677	1.82797	0.958955
T1G;T3A	0.000383066	0.00234772	52.938	6.33069	100	33.6792	47.062	34.269	0.256457	0.248595
T1G;T3C	NA	NA	NA	NA	NA	NA	NA	NA	NA	NA
T1G;T3G	0.00359668	0.0161295	71.0993	6.86713	100	33.8943	28.9007	34.583	0.55086	0.888078
T1G;C4A	1.46e-05	1.29e-05	85.0545	1.45547	92.302	0.626566	7.24754	1.5846	0.752873	0.518065
T1G;C4G	1.25e-07	0.236767	87.0801	2.46234	91.4786	7.68276	4.3985	8.06771	4.62e-07	0.326475
T1G;C4T	0.00483265	0.00119006	58.2373	1.40621	81.1798	3.20829	22.9425	3.50294	2.5586	1.84209
T1G;A5C	NA	NA	NA	NA	NA	NA	NA	NA	NA	NA
T1G;A5G	NA	NA	NA	NA	NA	NA	NA	NA	NA	NA
T1G;A5T	1.43e-05	6.13e-06	3.66483	2.53153	50.7152	4.22495	47.0504	4.92533	1.18512	0.71741
T1G;G6A	1.31e-05	1.17e-05	89.7802	2.28777	93.8591	0.72864	4.07894	2.401	4	61.7074
T1G;G6C	NA	NA	NA	NA	NA	NA	NA	NA	NA	NA
T1G;G6T	1.25e-07	470803	86.9036	3.36444	94.8266	2.15516e+07	7.92298	2.15516e+07	1.48e-06	3.92789
T1G;C7A	1.36e-05	2.61e-05	82.7909	3.83208	87.1008	1.33276	4.30989	4.05723	1.90924	7.82521
T1G;C7G	0.000275766	0.000736721	85.9436	1.79219	91.0852	1.26738	5.14165	2.19504	4	17.1797
T1G;C7T	0.00125668	0.0110393	71.3159	4.47724	100	30.4687	28.6841	30.7959	0.25764	0.295905
T1G;C8A	0.00466019	0.217285	83.8806	3.49057	100	64.1892	16.1194	64.284	0.172982	0.537183
T1G;C8G	1.25e-07	0.53714	84.5714	4.95573	99.2139	10.1421	14.6425	11.2881	1.89e-07	0.162486
T1G;C8T	0.000520422	0.00212199	73.6521	4.42873	100	14.8476	26.3479	15.494	0.307049	0.251032
T1G;G9A	0.0239711	0.0338572	18.4003	1.25148	100	93.2541	81.5997	93.2625	1.60552	0.955475
T1G;G9C	0.0152916	0.0369785	16.7344	1.9967	33.5545	47.9377	16.8201	47.9793	4	26.8458
T1G;G9T	0.0455539	0.285384	10.1634	1.19876	100	552.272	89.8366	552.273	1.53133	1.8894
T1G;G10A	0.0170763	0.0957749	39.5524	4.55032	100	93.1966	60.4476	93.3076	0.537946	0.527418
T1G;G10C	0.00273754	0.0030949	74.0723	2.11737	65.1927	4.58536	-8.87964	5.05062	2.51707	4.98389
T1G;G10T	0.0194081	0.0862378	26.3649	1.26057	65.6001	248.367	39.2352	248.37	4	23.5696
T1G;A11C	0.00328488	0.00310524	53.6001	2.39405	42.708	4.87237	-10.8921	5.42876	4	9.65979
T1G;A11G	0.000672205	0.000417095	69.6036	3.39129	89.6169	3.17331	20.0133	4.64444	1.40174	1.30834
T1G;A11T	1.25e-07	2.61461	12.1387	3.99106	32.9575	18.523	20.8188	18.9481	2.51e-08	0.173535
T1G;A12C	0.0149846	0.0434149	12.7393	2.0009	26.1901	46.1872	13.4507	46.2305	4	34.8698
T1G;A12G	0.00363326	0.00167961	36.5791	2.28967	78.5938	8.13025	42.0147	8.44651	1.37048	0.649774
T1G;A12T	0.0466058	35.9494	12.6552	1.14038	100	233801	87.3448	233801	4	300.557
T1G;G13A	6.77e-07	4.28e-06	71.7054	3.4791	90.4788	18.4282	18.7734	18.7537	0.172721	0.542817
T1G;G13C	3.72e-06	61.5944	44.4444	11.2923	66.1042	89.4951	21.6598	90.2047	4.89e-07	0.280212
T1G;G13T	0.0291862	0.498445	63.8805	1.77064	100	921.02	36.1195	921.021	2.66129	20.2848
T1G;C14A	2.52e-06	18.1519	89.2857	4.48933	92.8783	5.57246	3.59258	7.15586	4.44e-08	0.144953
T1G;C14G	NA	NA	NA	NA	NA	NA	NA	NA	NA	NA
T1G;C14T	2.5	16150.9	64.7828	15.466	100	5368.17	35.2172	5368.19	0.0458348	4.69189
T1G;G15A	2.92e-05	7.37e-05	17.8014	4.40103	12.2875	1.77874	-5.51385	4.7469	1.11338	2.63075
T1G;G15C	5.22e-05	7.25e-05	58.8781	4.04984	66.6741	1.81064	7.79599	4.43618	1.59097	3.54883
T1G;G15T	0.031671	0.179908	39.7782	1.67559	100	411.77	60.2218	411.773	2.10498	4.38712
T1G;G16A	0.00444272	173611	11.0497	5.09641	6.63001	6.25308	-4.41972	8.06687	1.8e-08	0.42416
T1G;G16C	0.00153003	0.00115665	76.5155	2.6435	57.8378	6.58486	-18.6777	7.09567	2.15992	3.4713
T1G;G16T	0.0525619	792.066	41.8457	5.91338	100	3.17886e+06	58.1543	3.17886e+06	4	3793.97
T1G;G17A	1.25e-07	4.48e-05	55.742	6.80889	61.1405	149.136	5.39846	149.292	0.106034	7.19143
T1G;G17C	0.000814236	0.0012824	83.4622	1.44083	87.9512	2.03474	4.489	2.49322	1.09135	1.94804
T1G;G17T	1.25e-07	5.33e-05	54.268	6.77823	61.3871	3.33514	7.11905	7.55431	0.79475	73.4912
T1G;A18C	5.23e-05	5.97e-05	20.0204	3.69078	15.6269	1.84484	-4.39348	4.12617	4	37.0697
T1G;A18G	0.000279012	0.000564057	20.0606	1.56198	25.8468	1.43233	5.78619	2.11928	4	12.816
T1G;A18T	0.00451895	0.00322764	11.1863	1.09532	17.5566	3.03729	6.3703	3.22875	3.01717	8.17915
T1G;C19A	NA	NA	NA	NA	NA	NA	NA	NA	NA	NA
T1G;C19G	0.0919022	42722.8	59.0019	1.56043	100	7.50986e+07	40.9981	7.50986e+07	4	13606.2
T1G;C19T	NA	NA	NA	NA	NA	NA	NA	NA	NA	NA
T1G;G20A	NA	NA	NA	NA	NA	NA	NA	NA	NA	NA
T1G;G20C	NA	NA	NA	NA	NA	NA	NA	NA	NA	NA
T1G;G20T	2.5	472.359	74.1002	2.86475	98.4192	293.959	24.319	293.973	0.114311	0.568143
T1G;A21C	0.0102241	0.00586207	13.8334	1.29211	25.0862	5.7676	11.2527	5.91057	4	7.01698
T1G;A21G	0.00297773	0.00117028	55.1759	1.93833	89.7242	5.03644	34.5483	5.39656	1.2075	0.461797
T1G;A21T	0.134629	3.99859	15.944	2.15251	98.7159	1678.27	82.7719	1678.27	0.936812	2.23733
T1G;C22A	NA	NA	NA	NA	NA	NA	NA	NA	NA	NA
T1G;C22G	0.00186422	0.0048573	65.4534	6.67446	34.4738	26.1549	-30.9795	26.9931	0.815783	1.36442
T1G;C22T	NA	NA	NA	NA	NA	NA	NA	NA	NA	NA
T1G;C23A	0.00389087	0.00246588	73.5825	3.28748	48.6856	8.52387	-24.8969	9.13586	4	7.87072
T1G;C23G	2.5	8442.11	44.2187	7.56073	100	3461.34	55.7813	3461.35	0.0361271	1.66046
T1G;C23T	2.5	8460.77	27.5352	23.4308	100	6598.67	72.4648	6598.71	0.0520719	3.08468
T1G;C24A	NA	NA	NA	NA	NA	NA	NA	NA	NA	NA
T1G;C24G	0.0103256	38351.4	78.8909	3.83263	92.2891	4.59995	13.3982	5.98738	3.96e-08	0.0858211
T1G;C24T	NA	NA	NA	NA	NA	NA	NA	NA	NA	NA
T1G;G25A	0.00368679	85333.8	26.455	7.79094	46.299	10.1734	19.844	12.8139	7.42e-09	0.122844
T1G;G25C	4.72e-07	23.3362	21.1319	6.95401	31.9212	2691	10.7893	2691.01	1e-05	0.39341
T1G;G25T	0.00373767	62065.6	43.3071	8.98473	51.7691	11.6277	8.46206	14.6945	2.95e-08	0.490313
T1G;T26A	0.00731456	0.00971598	46.285	2.51338	88.9303	22.5569	42.6453	22.6965	0.918764	0.57255
T1G;T26C	0.00186388	0.000359897	55.8796	2.08974	92.0418	1.71881	36.1622	2.7058	2.10976	0.6746
T1G;T26G	0.0223467	0.176731	57.7191	4.21808	100	115.649	42.2809	115.725	0.660488	1.02136
T1G;T27A	0.0053312	0.000674074	32.9397	1.33337	80.0942	3.45536	47.1545	3.7037	2.48736	0.799237
T1G;T27C	0.00163073	0.000865566	51.7086	4.42414	82.0461	5.10583	30.3375	6.75592	1.98922	1.97427
T1G;T27G	0.0489553	1.08436	27.3195	1.81356	100	2213.08	72.6805	2213.08	1.98331	8.34693
T1G;T28A	0.00625258	0.00131013	37.8932	1.62068	79.6891	5.18702	41.7959	5.43432	2.26782	0.931248
T1G;T28C	0.00656753	0.00478496	41.1456	2.7593	61.2367	7.59755	20.0911	8.0831	4	8.29999
T1G;T28G	6.5e-06	0.0013202	76.2161	4.28892	82.769	1.32664	6.55286	4.48942	4	1244.19
T1G;T29A	0.00491017	0.000382358	24.9756	1.0533	72.7052	2.32017	47.7296	2.54806	3.18952	1.09834
T1G;T29C	0.00411365	0.00829692	64.3414	3.78149	100	20.0312	35.6586	20.3851	0.596398	0.440884
T1G;T29G	0.0066595	0.00801192	17.2618	1.85287	48.1406	16.9108	30.8789	17.012	1.13864	0.827816
T1G;C30A	0.00658865	0.00186597	17.9763	1.63982	70.8013	8.86455	52.825	9.01494	1.96714	0.802844
T1G;C30G	4.7e-07	16.7738	12.4233	8.82966	25.3411	7300.44	12.9178	7300.45	3.17e-05	0.456585
T1G;C30T	0.00481877	0.00113997	25.8401	1.97353	82.033	6.5577	56.1929	6.84823	1.69045	0.561307
T1G;C31A	0.0204402	0.0132899	13.4962	0.667908	100	37.6028	86.5038	37.6087	1.3687	0.338981
T1G;C31G	0.00423021	0.000535486	20.0732	1.5523	76.8094	3.55391	56.7362	3.87813	2.35479	0.687571
T1G;C31T	0.00652668	0.00200902	22.9555	1.85378	84.9056	10.3199	61.95	10.485	1.57331	0.54307
T1G;C32A	0.00164955	0.000241413	28.8958	2.0014	81.8956	2.52854	52.9997	3.22476	2.26364	0.669323
T1G;C32G	0.00151912	0.000418135	59.5669	2.55517	95.1662	2.43589	35.5993	3.53022	1.46461	0.554988
T1G;C32T	0.00227268	0.000336154	28.5278	1.66267	89.4104	3.07204	60.8826	3.49312	1.47907	0.281811
T1G;T33A	0.00331583	0.00133148	42.9791	3.44514	91.1163	7.14091	48.1372	7.92853	1.44799	0.700483
T1G;T33C	0.0155536	0.0585374	72.8338	1.80249	100	29.9811	27.1662	30.0353	0.580336	0.450125
T1G;T33G	0.170293	404837	79.2156	3.59213	100	5.25623	20.7844	6.36642	2.2e-08	0.0523083
T1G;C34A	0.00194057	0.000212479	35.3755	1.53619	89.4015	1.57435	54.026	2.19965	1.73805	0.286268
T1G;C34G	0.00264221	0.000616891	67.3893	1.55312	90.507	1.66403	23.1177	2.27622	2.10846	0.824763
T1G;C34T	0.00281558	0.000225563	33.1133	1.15206	91.4528	1.42615	58.3395	1.83335	1.8391	0.224931
T1G;T35A	0.0024161	0.000570759	37.7005	2.24438	90.9338	4.21509	53.2332	4.77538	1.2695	0.33687
T1G;T35C	0.0050169	0.00182628	61.6896	2.25567	82.9766	4.59408	21.287	5.11797	2.66492	3.0821
T1G;T35G	1.25e-07	0.415719	70.8738	4.68175	88.6112	13.6546	17.7374	14.4349	1.46e-07	0.129339
T1G;T36A	0.0027557	0.000587585	40.5379	2.08167	88.1216	3.47968	47.5837	4.05481	1.51381	0.412585
T1G;T36C	0.0778072	1.76361	19.8494	4.00164	100	997.369	80.1506	997.377	0.850585	2.20192
T1G;T36G	0.000698898	0.000131772	49.1577	2.45064	87.5155	1.61082	38.3578	2.93264	2.17389	0.75509
T1G;T37A	0.00301477	0.000565209	34.7139	1.70798	88.1084	3.62384	53.3945	4.00617	1.46155	0.324529
T1G;T37C	4.45e-06	3.05e-05	74.4969	8.36024	90.0423	16.9186	15.5454	18.8715	0.273475	1.10545
T1G;T37G	1.25e-07	1.30321	56.7567	13.1247	84.8668	36.4604	28.1101	38.7507	1.06e-07	0.240321
T1G;C38A	0.00394522	0.00140539	33.1535	2.36671	84.0149	7.64274	50.8613	8.0008	1.42029	0.584785
T1G;C38G	0.00404282	0.00249405	32.8558	3.20123	100	14.3959	67.1442	14.7476	0.866097	0.325767
T1G;C38T	0.00379166	0.000790986	27.0616	1.99371	78.7157	4.69404	51.6541	5.09989	1.91706	0.641788
T1G;A39C	0.00235778	0.000617193	52.5574	2.29762	85.6944	2.67724	33.137	3.52798	2.03843	0.846859
T1G;A39G	0.0284665	0.353181	60.1701	4.56571	100	110.488	39.8299	110.583	0.414463	0.601314
T1G;A39T	0.00476286	0.000703	35.7754	1.33091	78.3492	3.4134	42.5737	3.66368	2.01464	0.602069
T1G;T40A	0.00815993	0.0100247	35.3322	3.71607	100	34.1959	64.6678	34.3973	1.00909	0.641405
T1G;T40C	0.00167705	0.000365968	39.2452	3.96461	85.8776	3.12532	46.6324	5.04835	4	2.50388
T1G;T40G	0.00481887	0.00183265	42.6226	2.51365	85.6557	7.89699	43.0331	8.28739	1.56579	0.807816
T1G;T41A	0.00469953	0.00136062	48.739	2.85301	85.6507	5.64202	36.9117	6.32235	2.49317	1.95135
T1G;T41C	0.0050528	0.000773659	47.1105	2.0749	81.0793	4.01649	33.9688	4.52077	4	5.1155
T1G;T41G	0.0133189	0.0164125	42.6511	1.59502	71.0935	24.0194	28.4423	24.0723	1.63077	1.53617
T1G;G42A	0.00385031	0.001386	32.2191	2.78056	80.2386	7.41566	48.0195	7.91982	1.6078	0.754082
T1G;G42C	0.00313777	0.0008228	42.1967	2.17978	81.2041	3.87932	39.0074	4.44978	1.88083	0.746358
T1G;G42T	0.00679733	0.0058789	32.074	2.20801	100	20.6928	67.926	20.8102	0.802772	0.278592
T1G;C43A	0.0062534	0.00158595	25.3516	1.44053	61.1604	5.76918	35.8088	5.94631	2.5776	1.43918
T1G;C43G	0.0131081	0.00484803	20.9174	1.36341	45.2816	12.1447	24.3642	12.221	4	7.72421
T1G;C43T	0.00382831	0.00115609	30.4857	1.92998	85.5542	6.76275	55.0685	7.03275	1.3483	0.406922
T1G;G44A	NA	NA	NA	NA	NA	NA	NA	NA	NA	NA
T1G;G44C	NA	NA	NA	NA	NA	NA	NA	NA	NA	NA
T1G;G44T	NA	NA	NA	NA	NA	NA	NA	NA	NA	NA
T1G;C45A	2.5	256.448	48.5501	4.67685	95.2872	906.877	46.7371	906.889	0.276844	0.922969
T1G;C45G	0.0353486	6.36599	34.9274	1.44553	100	34276.7	65.0726	34276.7	4	178.716
T1G;C45T	4.4e-06	0.00829991	52.968	9.10008	65.7736	3.14353	12.8056	9.62773	4	7233.03
T1G;G46A	3.71e-05	1.26e-05	49.3685	3.21587	87.4884	1.39631	38.1199	3.50592	0.779464	0.183796
T1G;G46C	NA	NA	NA	NA	NA	NA	NA	NA	NA	NA
T1G;G46T	NA	NA	NA	NA	NA	NA	NA	NA	NA	NA
T1G;G47A	NA	NA	NA	NA	NA	NA	NA	NA	NA	NA
T1G;G47C	0.0033961	0.00451104	89.6204	1.14564	86.1933	2.40112	-3.42716	2.66043	4	14.0716
T1G;G47T	NA	NA	NA	NA	NA	NA	NA	NA	NA	NA
T1G;G48A	NA	NA	NA	NA	NA	NA	NA	NA	NA	NA
T1G;G48C	NA	NA	NA	NA	NA	NA	NA	NA	NA	NA
T1G;G48T	NA	NA	NA	NA	NA	NA	NA	NA	NA	NA
T1G;G49A	6.16e-06	39.1425	48.8746	4.35119	72.4397	13.8644	23.5651	14.5312	1.38e-07	0.101241
T1G;G49C	0.0017838	14789	74.2268	6.88494	79.5024	8.37823	5.27564	10.8442	1.27e-08	0.0902528
T1G;G49T	0.000116201	0.000154244	25.9397	2.65393	30.0175	1.66408	4.07785	3.13249	4	33.7286
T1G;A50C	NA	NA	NA	NA	NA	NA	NA	NA	NA	NA
T1G;A50G	1.25e-07	2.5712	51.9737	10.0269	64.3037	24.2862	12.33	26.2747	1.87e-07	0.541818
T1G;A50T	NA	NA	NA	NA	NA	NA	NA	NA	NA	NA
T1G;C51A	1.25e-07	0.58404	64.4444	5.07427	90.1969	15.7382	25.7524	16.536	5.83e-08	0.0960763
T1G;C51G	NA	NA	NA	NA	NA	NA	NA	NA	NA	NA
T1G;C51T	NA	NA	NA	NA	NA	NA	NA	NA	NA	NA
T1G;G52A	0.00318845	0.00367255	80.1185	2.46619	70.7429	5.40581	-9.37564	5.94179	4	12.5189
T1G;G52C	0.00199404	24334	35.7143	8.53714	50.4178	11.5056	14.7035	14.327	5.57e-08	0.260218
T1G;G52T	NA	NA	NA	NA	NA	NA	NA	NA	NA	NA
T1G;A53C	0.0471891	0.243884	14.139	0.854921	83.6811	339.632	69.5421	339.633	1.47975	1.48902
T1G;A53G	0.00559559	0.000922632	18.9741	0.955179	58.3894	4.03066	39.4153	4.1423	2.32298	0.792915
T1G;A53T	NA	NA	NA	NA	NA	NA	NA	NA	NA	NA
T1G;C54A	0.0117967	0.00326859	21.2824	1.36813	41.127	7.39359	19.8446	7.51911	4	6.52325
T1G;C54G	0.0441268	23.1501	13.3651	1.29627	100	153763	86.6349	153763	4	248.135
T1G;C54T	NA	NA	NA	NA	NA	NA	NA	NA	NA	NA
T1G;C55A	0.0520186	0.387954	19.4864	1.71412	100	470.199	80.5136	470.202	1.2353	1.60166
T1G;C55G	6.49e-07	15.3149	47.3684	11.3908	58.736	145.775	11.3677	146.219	9.81e-07	0.549856
T1G;C55T	0.0165347	0.0443495	47.62	2.77978	100	63.6841	52.38	63.7447	0.93876	0.809137
T1G;C56A	0.0276082	0.0489492	17.0244	1.27064	100	122.872	82.9756	122.879	1.56981	1.00091
T1G;C56G	0.0306111	0.0895077	7.13782	1.2527	100	300.472	92.8622	300.475	1.96427	2.02064
T1G;C56T	0.0226674	0.0452724	23.735	2.09901	100	108.148	76.265	108.169	1.41878	1.13243
T1G;T57A	0.0305816	0.109635	8.45776	1.94523	100	123.127	91.5422	123.142	0.683239	0.376158
T1G;T57C	0.00211607	0.000514965	16.0622	1.91891	80.026	5.58584	63.9638	5.90626	1.59694	0.49651
T1G;T57G	0.0311817	0.103851	10.2159	1.69555	100	234.556	89.7841	234.563	1.41194	1.31664
T1G;G58A	0.00580537	0.00929939	30.2806	3.62924	85.562	29.2395	55.2814	29.4638	0.754257	0.485898
T1G;G58C	0.00341669	0.0163145	48.5898	6.58625	100	45.0466	51.4102	45.5256	0.391047	0.352949
T1G;G58T	0.00559182	0.00638893	35.5774	4.23785	100	26.0932	64.4226	26.4351	0.843681	0.485777
T1G;C59A	0.00210049	0.0228102	75.6196	4.26487	100	32.7997	24.3804	33.0758	0.261689	0.348885
T1G;C59G	0.060689	1.5982	61.1913	4.04783	100	121.291	38.8087	121.359	0.218894	0.325404
T1G;C59T	0.00372448	0.0141506	74.0411	3.38149	92.5783	18.7554	18.5372	19.0578	0.573712	0.736696
T1G;A60C	0.00712045	0.0133216	84.5266	1.12655	74.1509	9.94007	-10.3757	10.0037	1.3118	1.75934
T1G;A60G	0.00321064	0.00183556	25.1751	3.4204	91.2613	13.5057	66.0861	13.9321	1.0647	0.466058
T1G;A60T	0.0439781	0.42107	25.8632	1.61539	58.3044	152.679	32.4412	152.688	0.843723	1.31231
T1G;G61A	0.0031622	0.00250501	48.9079	2.63862	84.6856	10.0459	35.7778	10.3866	0.980554	0.561914
T1G;G61C	0.00236518	0.000953322	41.667	2.11167	87.9312	6.17825	46.2642	6.52916	0.894425	0.278556
T1G;G61T	0.00264064	0.000359896	44.8616	1.44632	86.1656	1.74835	41.304	2.26904	2.20513	0.503852
T1G;A62C	0.000817923	0.000220994	42.947	3.40506	97.1728	3.23467	54.2258	4.69654	0.895131	0.238255
T1G;A62G	0.00809326	0.0309874	51.2416	5.27768	100	53.4878	48.7584	53.7476	0.596848	0.614756
T1G;A62T	0.0118814	0.0180696	33.6233	2.77021	100	42.7313	66.3767	42.821	0.919248	0.526284
T1G;G63A	0.00545015	0.000880514	18.6542	1.32114	79.6732	5.08723	61.0189	5.25598	1.81096	0.428969
T1G;G63C	0.00403464	0.000562062	18.7392	1.77173	81.5099	3.82145	62.7707	4.21219	2.2808	0.660487
T1G;G63T	0.0033382	0.000287062	10.8651	1.00225	84.5107	2.31518	73.6456	2.52281	1.98775	0.262846
T1G;A64C	0.00399522	0.000429795	16.1369	1.48382	80.5527	2.90511	64.4159	3.26211	2.36437	0.553967
T1G;A64G	0.00146678	0.000382978	45.1265	2.77089	92.9497	3.66614	47.8232	4.59548	1.16529	0.367634
T1G;A64T	0.00296041	0.000342365	21.0742	1.35022	89.0535	2.72906	67.9793	3.04481	1.61614	0.240157
T1G;G65A	0.00107975	0.000104965	35.8531	1.67045	94.1233	1.08133	58.2701	1.98989	1.8187	0.287311
T1G;G65C	0.00173546	0.000129202	14.027	1.13672	91.5944	1.4712	77.5674	1.85918	1.55311	0.15806
T1G;G65T	0.00109176	7.65e-05	33.5249	1.22276	91.9167	0.851489	58.3918	1.49002	1.76466	0.199305
T1G;G66A	0.00097611	0.000200432	53.372	2.47142	96.2948	1.60506	42.9229	2.94689	1.38864	0.363757
T1G;G66C	0.000329414	9.03e-05	67.6033	2.22281	98.7441	0.765249	31.1408	2.35085	0.938884	0.190687
T1G;G66T	0.000874386	0.000249594	86.6708	1.12294	96.7791	0.668387	10.1083	1.30681	2.72594	1.62427
T1G;C67A	NA	NA	NA	NA	NA	NA	NA	NA	NA	NA
T1G;C67G	0.0113643	0.254541	56.9142	6.76318	100	120.276	43.0858	120.466	0.247203	0.445145
T1G;C67T	0.000113695	400.199	78.9421	4.37617	100	5.33499	21.0579	6.90022	9.26e-09	0.0284981
T1G;T68A	1.25e-07	0.223831	86.4753	4.01118	100	8.0794	13.5247	9.02033	4.02e-07	0.0952531
T1G;T68C	0.000195483	0.0049289	74.0579	5.81717	100	53.3005	25.9421	53.617	0.170268	0.456101
T1G;T68G	1.25e-07	1.34e-05	40.343	9.10159	60.4013	6.15536	20.0583	10.9876	0.637127	15.1078
T1G;G69A	0.00364804	0.0114792	90.8715	1.75696	100	8.61809	9.1285	8.79537	0.653978	0.879905
T1G;G69C	0.00878623	0.0252806	93.3759	0.684166	100	6.845	6.62415	6.8791	0.800624	0.87384
T1G;G69T	0.0542602	1.91827	94.1716	1.33943	100	59.1181	5.82835	59.1333	0.505613	2.11859
T1G;A70C	0.000768164	0.000502182	56.5942	4.77343	100	6.20329	43.4058	7.82728	0.588297	0.23759
T1G;A70G	0.00154152	0.000305954	62.3507	2.03814	95.0331	1.4857	32.6823	2.52216	1.79574	0.602774
T1G;A70T	0.00270525	0.00336671	79.5185	2.80664	100	8.01382	20.4815	8.49109	0.734594	0.565725
T1G;A71C	0.00222107	0.000481724	48.5151	2.20313	91.4842	2.84433	42.9691	3.59778	1.48205	0.424613
T1G;A71G	0.000939176	0.000216657	54.5463	3.05964	97.8702	1.821	43.324	3.56054	1.35931	0.450014
T1G;A71T	0.0040271	0.000385613	19.0164	0.598137	86.5178	2.57621	67.5014	2.64473	1.16546	0.0928961
T1G;A72C	0.0137458	0.0192811	16.1421	1.53888	69.4064	35.1913	53.2642	35.2249	1.00907	0.509094
T1G;A72G	0.00140687	0.000111843	46.4571	1.07274	97.647	0.846439	51.1899	1.36647	1.21974	0.112036
T1G;A72T	0.00459526	0.000839907	33.8267	1.313	89.281	4.53679	55.4544	4.72297	1.33794	0.255707
T2A;T3A	3.41e-05	3.31e-05	55.3806	8.83154	95.1694	2.85835	39.7887	9.28258	0.639202	0.31661
T2A;T3C	0.0012259	0.000156021	23.622	2.36888	90.7608	2.81381	67.1388	3.6782	2.74864	0.900233
T2A;T3G	0.000497297	9.8e-05	27.127	3.35055	90.3085	2.18473	63.1815	3.9999	2.07275	0.736038
T2A;C4A	0.000225158	0.000302391	17.68	6.0588	84.7812	15.5512	67.1012	16.6898	0.526582	0.281039
T2A;C4G	9.04e-05	7.67e-05	13.2755	3.9828	76.9073	9.23779	63.6317	10.0598	0.538815	0.221891
T2A;C4T	0.000341778	0.000625705	12.6465	6.59075	84.7007	23.6086	72.0541	24.5113	0.501839	0.311624
T2A;A5C	2.29e-05	7.87e-06	53.6335	3.94792	81.3318	1.30726	27.6983	4.15873	1.74737	0.676665
T2A;A5G	0.00037532	6.86e-05	34.8712	2.20643	88.1821	1.58449	53.311	2.71642	1.33728	0.265699
T2A;A5T	0.00279744	0.0114644	11.5526	5.70607	100	76.8818	88.4474	77.0932	0.500586	0.394629
T2A;G6A	3.44e-05	2.88e-05	82.5114	2.66298	91.862	0.847872	9.35062	2.7947	1.1625	0.898578
T2A;G6C	3.11e-05	0.000153529	79.6059	3.27225	100	11.3232	20.3941	11.7865	0.219223	0.259887
T2A;G6T	1.25e-07	0.450717	86.1989	6.3456	100	12.3718	13.8011	13.9042	6.51e-08	0.141337
T2A;C7A	7.3e-05	0.00536678	82.2521	5.02599	100	79.2973	17.7479	79.4564	0.122706	0.732776
T2A;C7G	1.25e-07	0.404806	88.4181	6.81025	100	26.6633	11.5819	27.5193	1.17e-06	0.202873
T2A;C7T	0.000424626	8.64e-05	62.0917	2.13552	93.5777	1.10905	31.486	2.40634	2.16013	0.961759
T2A;C8A	7.35e-06	9.05e-06	80.1833	3.14574	98.4447	1.5605	18.2614	3.51153	0.388722	0.21269
T2A;C8G	0.00014793	0.000459261	83.1735	3.39448	100	7.14246	16.8265	7.90805	0.310494	0.278176
T2A;C8T	0.000383634	0.000171938	67.0809	2.50589	95.919	0.879295	28.8381	2.65568	4	6.52076
T2A;G9A	0.0110838	0.00730106	13.0637	1.59678	100	28.8249	86.9363	28.8691	1.21372	0.402086
T2A;G9C	0.0189193	0.0795646	17.3355	1.22595	53.7818	211.679	36.4464	211.683	4	23.9262
T2A;G9T	0.0153693	0.0163153	7.27662	1.20259	34.2786	33.7533	27.002	33.7748	4	10.8139
T2A;G10A	0.00164927	0.000173461	26.7315	1.42268	96.628	2.01921	69.8965	2.47006	1.16874	0.142978
T2A;G10C	0.00432832	0.000836367	26.5672	1.40353	84.5075	4.6866	57.9402	4.89225	1.47837	0.329552
T2A;G10T	0.00626201	0.00121946	12.4525	1.53454	73.6159	6.90299	61.1634	7.0715	2.91144	1.3963
T2A;A11C	0.00759257	0.0221474	27.3719	4.54331	87.1835	53.9404	59.8116	54.1314	0.670292	0.571492
T2A;A11G	7.58e-05	5.45e-05	46.073	9.38168	93.8731	2.44637	47.8001	9.6954	0.833284	0.324108
T2A;A11T	0.0266113	0.0911301	10.0775	1.78979	100	129.418	89.9225	129.43	0.783328	0.467161
T2A;A12C	0.00515882	0.0032529	11.7458	2.07794	59.6804	14.1068	47.9345	14.259	1.3461	0.685422
T2A;A12G	0.000691386	8.18e-05	18.1061	1.47511	81.7631	1.7674	63.657	2.3021	1.35487	0.207821
T2A;A12T	9.32e-06	3.5e-05	18.36	5.73308	9.29095	3.38303	-9.06908	6.65681	0.662368	1.95178
T2A;G13A	0.000496183	0.00860245	55.295	7.18507	100	72.3959	44.705	72.7516	0.197304	0.383578
T2A;G13C	0.000464535	0.000105704	21.1076	2.86088	73.9503	3.7162	52.8427	4.68986	2.74186	2.22109
T2A;G13T	0.000139008	6.85e-05	23.2632	3.63767	82.9945	4.53444	59.7313	5.81324	0.58469	0.141562
T2A;C14A	NA	NA	NA	NA	NA	NA	NA	NA	NA	NA
T2A;C14G	NA	NA	NA	NA	NA	NA	NA	NA	NA	NA
T2A;C14T	0.00507977	0.00211363	14.4517	2.385	42.7006	8.12605	28.2489	8.46882	2.8648	3.95576
T2A;G15A	0.0456259	57.787	19.5759	1.74091	100	350171	80.4241	350171	4	531.745
T2A;G15C	0.0140095	0.0153704	15.6951	2.58619	100	57.8891	84.3049	57.9468	1.4906	0.992036
T2A;G15T	0.0328563	0.324189	15.7682	1.50854	100	1316.51	84.2318	1316.51	2.60789	9.10451
T2A;G16A	1.25e-07	7.50423	7.57512	7.74713	14.1534	18604	6.57829	18604	9.42e-05	0.722526
T2A;G16C	0.033356	0.366799	22.4142	1.60201	100	1399.05	77.5858	1399.05	2.66117	10.1047
T2A;G16T	0.646922	32.4357	19.6447	3.88698	100	1325.33	80.3553	1325.33	0.463444	1.09706
T2A;G17A	0.0232167	0.0837026	22.6889	3.31282	100	145.947	77.3111	145.984	1.02683	1.04699
T2A;G17C	0.0129711	0.0489072	50.3188	4.35713	100	73.4312	49.6812	73.5604	0.836073	1.00215
T2A;G17T	0.010361	0.049729	25.4586	5.54986	100	81.8262	74.5414	82.0142	0.470541	0.396663
T2A;A18C	0.00505979	0.0107568	15.9473	1.77899	30.3412	12.3713	14.3939	12.4986	1.01294	1.27678
T2A;A18G	NA	NA	NA	NA	NA	NA	NA	NA	NA	NA
T2A;A18T	0.00787411	0.00960493	15.8843	1.75982	24.8211	5.8461	8.93679	6.10523	4	9.85675
T2A;C19A	0.0029753	0.0218722	46	5.98171	91.1	48.5634	45.1	48.9304	0.310884	0.317244
T2A;C19G	0.0261136	1.05098	25.4411	2.63862	100	6353.2	74.5589	6353.2	4	96.9608
T2A;C19T	0.0396815	0.290776	12.7467	2.94717	100	409.263	87.2533	409.274	1.09012	1.53464
T2A;G20A	0.0851401	2.21768	59.9395	5.04194	100	249.055	40.0605	249.106	0.410903	0.936975
T2A;G20C	0.0024887	0.0023787	40.093	4.29633	56.5911	5.64488	16.4981	7.09388	4	11.3169
T2A;G20T	0.00627057	0.00330272	69.6581	1.69428	83.5208	3.68966	13.8627	4.06007	4	6.69477
T2A;A21C	0.09517	3.01563	15.7841	1.28179	100	2860.67	84.2159	2860.67	1.40242	4.15538
T2A;A21G	0.000547391	9.21e-05	34.1475	2.76579	93.2498	1.67292	59.1024	3.23238	1.58942	0.389444
T2A;A21T	0.0266857	0.118175	19.3955	2.85746	100	157.467	80.6045	157.493	0.829517	0.755032
T2A;C22A	0.0122418	0.0136508	17.3175	1.8318	100	35.958	82.6825	36.0047	0.84168	0.28586
T2A;C22G	0.0416462	0.366214	8.26288	1.12504	100	1148.57	91.7371	1148.57	2.14933	4.47023
T2A;C22T	0.0317984	0.252349	20.189	3.33528	100	639.684	79.811	639.692	1.79756	4.9591
T2A;C23A	0.00349893	142165	19.2857	6.73796	11.7273	8.57683	-7.55842	10.907	6.27e-09	0.249285
T2A;C23G	NA	NA	NA	NA	NA	NA	NA	NA	NA	NA
T2A;C23T	0.00546676	0.00400095	16.7105	2.31158	45.5472	10.8866	28.8367	11.1293	1.83099	1.82177
T2A;C24A	0.11351	2.45145	25.4369	2.70724	99.1633	845.857	73.7265	845.861	0.790464	1.60842
T2A;C24G	0.019175	0.197127	50.7459	2.55024	84.1328	481.794	33.3868	481.801	4	56.4556
T2A;C24T	0.00158265	0.000754066	37.9601	4.3182	93.7896	7.91695	55.8296	9.01803	0.910352	0.405701
T2A;G25A	NA	NA	NA	NA	NA	NA	NA	NA	NA	NA
T2A;G25C	0.0299099	0.278972	21.1734	1.97332	100	1078.02	78.8266	1078.03	2.57882	10.1535
T2A;G25T	0.0250022	0.0659474	16.0331	2.14822	100	159.923	83.9669	159.937	1.39509	1.26902
T2A;T26A	0.00111076	8.26e-05	30.6748	1.36181	97.1341	0.825114	66.4593	1.59227	1.31794	0.118992
T2A;T26C	0.000933085	5.4e-05	23.0535	1.17057	96.4482	0.670235	73.3947	1.34887	1.67402	0.147769
T2A;T26G	0.00189145	0.000257567	37.1206	2.29948	97.3178	1.73972	60.1971	2.88344	1.56018	0.282516
T2A;T27A	0.00160202	0.000164292	23.1312	1.83082	95.6495	1.56191	72.5183	2.40655	1.53199	0.213762
T2A;T27C	0.00057507	0.000126133	46.916	3.49002	98.7521	0.809475	51.8361	3.58267	1.58869	0.416493
T2A;T27G	0.00688991	0.00248904	15.7185	1.32559	83.4722	10.9373	67.7537	11.0174	1.13318	0.258438
T2A;T28A	0.0019569	0.000109442	26.1766	1.02325	94.681	0.809599	68.5044	1.3048	1.72238	0.134547
T2A;T28C	0.00143099	0.000131279	22.6969	1.55911	93.8599	1.37763	71.163	2.08055	1.52563	0.191823
T2A;T28G	0.00478384	0.000894014	33.7857	1.23588	90.2981	4.59786	56.5124	4.76106	1.2263	0.219601
T2A;T29A	0.00209882	0.000176266	20.6331	1.30958	93.473	1.61697	72.8399	2.08077	1.56269	0.174927
T2A;T29C	0.000434286	6.99e-05	67.8469	1.77068	96.4462	0.611471	28.5993	1.87329	2.54926	0.861413
T2A;T29G	0.00457498	0.000961623	17.0145	2.02984	74.7771	6.01445	57.7626	6.34774	1.92567	0.677841
T2A;C30A	0.00436224	0.000426238	15.2758	1.10552	80.3067	2.9314	65.0309	3.13294	2.34036	0.473297
T2A;C30G	0.00818353	0.00467985	11.6592	1.98928	84.0785	20.9044	72.4192	20.9989	1.40658	0.590429
T2A;C30T	0.00204402	0.000103144	20.5306	0.78461	90.0326	0.941272	69.502	1.2254	1.84316	0.134764
T2A;C31A	0.00620159	0.0025053	14.7743	1.73974	81.0102	13.5358	66.2359	13.6472	1.69519	0.724148
T2A;C31G	0.00474496	0.00200618	17.3465	2.17147	100	12.5024	82.6535	12.6896	0.973836	0.247975
T2A;C31T	0.00301501	0.000445398	14.2912	1.72417	88.4907	3.70291	74.1995	4.08464	1.95126	0.41758
T2A;C32A	0.000889845	9.74e-05	24.2663	2.04817	96.7005	1.13709	72.4341	2.34265	1.51652	0.231253
T2A;C32G	0.000285057	0.000129138	31.4056	6.06945	95.2896	3.70878	63.884	7.1129	0.963195	0.337048
T2A;C32T	0.00113129	9e-05	19.1698	1.33575	94.092	1.20257	74.9222	1.79733	1.60035	0.188214
T2A;T33A	0.000748585	5.74e-05	31.5351	1.5102	97.6341	0.544331	66.0989	1.6053	1.55608	0.158036
T2A;T33C	0.000354476	6.07e-05	37.2347	2.38232	97.3442	1.25797	60.1095	2.69405	0.862185	0.107917
T2A;T33G	0.0013466	0.00033977	54.3321	1.7011	89.4471	2.67404	35.115	3.16927	0.928859	0.230646
T2A;C34A	0.000724128	8.12e-05	31.1101	2.35044	95.7083	0.90331	64.5983	2.51804	2.0196	0.37176
T2A;C34G	0.000374947	9.02e-05	46.3733	3.18832	97.6175	1.15552	51.2441	3.39125	1.08437	0.212764
T2A;C34T	0.000885525	5.64e-05	28.6069	1.25008	95.0846	0.69641	66.4777	1.43098	1.79151	0.178168
T2A;T35A	0.000860794	6.47e-05	33.4603	1.4728	95.8872	0.670956	62.4269	1.61844	1.8253	0.220843
T2A;T35C	0.00058001	8.36e-05	45.034	2.50719	96.7647	0.820023	51.7307	2.63788	1.81957	0.371769
T2A;T35G	0.000509382	5.26e-05	34.2053	1.68742	98.7401	0.595458	64.5349	1.7894	1.1305	0.104972
T2A;T36A	0.00124489	0.000134445	30.137	1.86908	93.2218	1.75585	63.0848	2.56446	1.84453	0.340622
T2A;T36C	0.0022573	0.00231138	8.39417	3.27612	77.5841	18.703	69.1899	18.9878	0.639589	0.251191
T2A;T36G	0.000181204	2.31e-05	35.2692	1.73612	96.2539	0.774969	60.9848	1.90123	0.776002	0.0587412
T2A;T37A	0.000996874	7.22e-05	19.8593	1.10089	91.8154	1.24012	71.9561	1.65827	1.52836	0.159821
T2A;T37C	0.00079325	0.0001205	43.4452	2.28214	97.4377	1.15964	53.9925	2.55987	1.30994	0.228694
T2A;T37G	0.000203843	4.61e-05	19.9034	3.81113	95.439	1.63222	75.5356	4.14595	1.17665	0.211154
T2A;C38A	0.00161915	0.000585994	16.3067	3.06072	100	8.41786	83.6933	8.95703	0.887637	0.240699
T2A;C38G	0.00110662	0.000125999	22.3498	1.86235	92.5099	1.90881	70.1601	2.66681	1.55029	0.265087
T2A;C38T	0.00108591	0.000121716	20.9375	1.75268	87.503	2.0671	66.5655	2.71012	1.99809	0.403251
T2A;A39C	0.000818393	8.41e-05	30.2842	1.6334	94.819	1.30072	64.5348	2.08803	1.31627	0.1812
T2A;A39G	0.00100402	0.000129672	25.3536	2.02198	94.5317	1.84609	69.1781	2.73796	1.30435	0.228785
T2A;A39T	0.000947994	0.000139544	28.5353	2.38736	96.7748	1.9619	68.2396	3.09007	1.15444	0.198879
T2A;T40A	0.00144985	0.000214631	24.0268	2.17219	94.4773	2.8392	70.4505	3.57483	1.37521	0.269272
T2A;T40C	0.00102786	6.95e-05	22.3919	1.09609	93.5969	1.04578	71.205	1.51495	1.37831	0.12989
T2A;T40G	0.0013584	0.000199019	16.0508	1.92407	91.5846	3.08897	75.5338	3.6392	1.56091	0.328591
T2A;T41A	0.000750328	0.000117476	26.3834	2.74235	92.82	1.87997	66.4366	3.32487	1.57849	0.349232
T2A;T41C	0.00109537	0.000134319	27.2527	1.93903	93.0353	1.78944	65.7827	2.63855	1.43309	0.24565
T2A;T41G	0.00296063	0.000310803	16.0161	1.03234	78.6444	2.51651	62.6283	2.72003	1.80559	0.263761
T2A;G42A	0.00123241	0.000148601	20.9137	1.77434	90.2193	2.22027	69.3056	2.84216	1.65683	0.296176
T2A;G42C	0.00122417	0.000154451	26.2823	2.23647	94.1498	1.90231	67.8675	2.93608	1.69298	0.354527
T2A;G42T	0.00103014	0.000135994	22.4124	2.31463	92.8729	2.24388	70.4605	3.22375	1.9841	0.468967
T2A;C43A	0.00237097	0.000175809	16.1096	0.984181	95.611	1.77995	79.5015	2.03392	1.39436	0.124286
T2A;C43G	0.0121099	0.00470456	11.9899	1.0395	96.3332	19.0155	84.3433	19.0439	1.41161	0.330498
T2A;C43T	0.00121883	0.000166965	18.8793	2.20073	92.3702	2.57181	73.4909	3.38488	1.66471	0.369051
T2A;G44A	0.0249606	0.0588666	11.3596	1.639	100	133.143	88.6404	133.153	1.22547	0.84801
T2A;G44C	0.000874337	0.000209402	28.3013	3.82327	94.0029	3.24364	65.7016	5.01384	1.28097	0.426799
T2A;G44T	0.00198634	0.000251675	18.9603	1.24639	83.3115	2.73244	64.3512	3.00329	1.41074	0.211456
T2A;C45A	0.0883675	0.674807	14.1072	2.02091	100	225.553	85.8928	225.563	0.56122	0.401787
T2A;C45G	0.0121439	0.0112637	12.5738	2.00429	90.5738	40.5282	78	40.5777	1.36535	0.713511
T2A;C45T	0.000368022	4.59e-05	16.3334	1.87215	87.1281	1.29466	70.7947	2.2762	1.32834	0.167943
T2A;G46A	4.82e-05	3.19e-05	65.3208	7.89418	94.3716	1.7317	29.0507	8.08188	1.49341	1.26343
T2A;G46C	0.00260094	0.000266264	24.6004	1.01167	100	2.54611	75.3996	2.73973	0.999373	0.0920259
T2A;G46T	0.000617521	0.00100198	73.4607	4.2168	100	8.0635	26.5393	9.09953	0.43086	0.254309
T2A;G47A	0.000947022	0.000331838	71.4451	2.01962	94.235	1.99017	22.7899	2.83543	1.12292	0.499854
T2A;G47C	0.0063777	0.000629148	46.6153	0.879395	88.2512	2.33577	41.6359	2.49583	2.28191	0.442091
T2A;G47T	0.00660568	0.00525841	50.542	1.95025	100	14.3156	49.458	14.4478	0.834609	0.305102
T2A;G48A	0.022025	0.100863	29.3594	3.81388	100	130.239	70.6406	130.295	0.782843	0.795039
T2A;G48C	5.57e-07	12.3312	42.5651	13.9071	77.9212	12156.9	35.3561	12156.9	3.11e-05	0.216768
T2A;G48T	0.0101492	0.0119669	40.1708	3.5531	100	35.376	59.8292	35.554	1.19495	0.873806
T2A;G49A	0.015213	0.0208708	19.2597	1.85508	81.8971	46.491	62.6374	46.528	1.1707	0.660749
T2A;G49C	0.0168068	0.0417818	11.8717	1.45073	41.9074	91.6535	30.0358	91.665	4	20.0658
T2A;G49T	0.0384302	5.85226	12.4477	0.941047	100	41554.4	87.5523	41554.4	4	115.277
T2A;A50C	0.0802313	0.85108	16.0679	1.46365	100	607.806	83.9321	607.807	1.01178	1.24737
T2A;A50G	0.0134308	0.0200877	27.9196	2.91269	100	55.3698	72.0804	55.4464	1.15406	0.776941
T2A;A50T	NA	NA	NA	NA	NA	NA	NA	NA	NA	NA
T2A;C51A	0.0202415	0.0445389	30.7054	2.03234	100	73.1613	69.2946	73.1895	0.966118	0.59899
T2A;C51G	0.0270868	0.16853	33.0844	2.54282	100	520.139	66.9156	520.145	2.36493	7.19707
T2A;C51T	0.012221	0.0145059	38.8665	3.32964	100	42.2389	61.1335	42.3699	1.37541	1.08289
T2A;G52A	0.00832507	0.0103565	49.8477	2.92754	100	25.3914	50.1523	25.5596	0.974996	0.598926
T2A;G52C	0.00770973	0.0164771	27.4	5.17498	100	52.4114	72.6	52.6663	0.758341	0.599326
T2A;G52T	0.0249533	0.245527	48.0899	4.09611	100	579.621	51.9101	579.635	2.2623	12.4365
T2A;A53C	0.0277742	0.0421494	14.0939	0.958114	100	72.4073	85.9061	72.4137	1.03741	0.374908
T2A;A53G	0.00338114	0.000785079	15.7272	1.78987	88.8143	6.44211	73.087	6.68614	1.26772	0.277941
T2A;A53T	0.00128539	0.000393974	13.8646	1.25699	23.667	2.06991	9.80236	2.42168	4	10.406
T2A;C54A	0.0129432	0.00337663	36.7545	1.6445	81.3377	13.174	44.5831	13.2762	3.17744	2.67864
T2A;C54G	0.0133432	0.00424618	21.0045	1.12295	47.7141	11.0619	26.7096	11.1187	4	6.19804
T2A;C54T	0.0144662	0.0218749	15.6224	1.27331	28.1661	22.7588	12.5437	22.7943	4	21.0594
T2A;C55A	0.0108488	0.0143123	26.3546	3.65291	100	47.4772	73.6454	47.6175	1.12448	0.766859
T2A;C55G	NA	NA	NA	NA	NA	NA	NA	NA	NA	NA
T2A;C55T	0.000243482	8.21e-05	28.9459	4.94695	97.9477	2.62696	69.0018	5.60118	0.7855	0.176342
T2A;C56A	0.00455176	0.002967	19.3129	3.07954	100	18.2188	80.6871	18.4772	0.928641	0.355489
T2A;C56G	0.0127554	0.0313819	16.0789	3.57082	91.3204	78.4752	75.2415	78.5564	0.926554	0.754741
T2A;C56T	0.0023173	0.00090996	23.2915	3.34164	100	9.02855	76.7085	9.62711	0.881092	0.274275
T2A;T57A	0.00358387	0.00221976	10.6184	2.19512	100	15.5011	89.3816	15.6558	0.666311	0.148897
T2A;T57C	0.00155454	0.000171531	18.8862	1.35979	88.5301	2.53569	69.6438	2.87728	2.16416	0.477928
T2A;T57G	0.0126508	0.018082	16.5519	2.29126	100	48.4413	83.4481	48.4954	0.884582	0.402354
T2A;G58A	0.000640526	0.000177226	26.3864	4.1984	92.4115	3.1199	66.0251	5.23071	1.32651	0.467905
T2A;G58C	0.000191187	0.000134258	44.3975	7.36209	93.9547	3.96766	49.5572	8.36318	0.713008	0.291943
T2A;G58T	0.000410014	4.46e-05	50.7358	1.24382	95.8147	0.622257	45.0789	1.39079	1.00405	0.09465
T2A;C59A	6.4e-05	1.96e-05	54.0324	3.28744	95.9691	0.884681	41.9368	3.4044	0.810329	0.138065
T2A;C59G	0.000277864	4.05e-05	17.1269	2.13685	87.6638	1.25401	70.5369	2.47763	1.66794	0.279314
T2A;C59T	0.000102685	3.77e-05	47.4647	4.40861	95.1875	1.37373	47.7229	4.61768	0.850764	0.177421
T2A;A60C	0.00112867	9.42e-05	19.2383	1.27216	93.3885	1.41467	74.1502	1.90255	1.33038	0.146092
T2A;A60G	0.00097147	0.000169362	21.1644	2.85829	88.995	3.2599	67.8307	4.33552	1.97483	0.584963
T2A;A60T	0.0073597	0.0054342	14.3574	2.10418	100	23.352	85.6426	23.4466	0.861305	0.260681
T2A;G61A	0.0002844	6.34e-05	26.0778	2.99761	90.049	2.08917	63.9712	3.65381	0.900174	0.148627
T2A;G61C	0.00017706	4.86e-05	25.873	4.21313	97.559	2.05475	71.6861	4.68749	0.726222	0.114494
T2A;G61T	0.00068186	9.5e-05	37.1334	2.05856	93.8306	1.36267	56.6972	2.46871	1.31471	0.237223
T2A;A62C	0.000166338	6.47e-05	53.6918	4.80285	98.9052	0.924731	45.2134	4.89106	0.993067	0.218871
T2A;A62G	0.00034321	5.89e-05	47.8166	1.92511	90.6697	1.00055	42.8531	2.1696	1.27029	0.218426
T2A;A62T	0.000335571	6.37e-05	35.6609	2.59679	98.713	1.64056	63.0522	3.07161	0.718677	0.0902927
T2A;G63A	0.00183218	0.000132485	17.8521	1.21562	97.9905	1.32013	80.1384	1.79457	1.38708	0.124993
T2A;G63C	0.00142613	0.000130789	20.9197	1.89409	95.5915	1.21198	74.6718	2.24866	1.90269	0.280063
T2A;G63T	0.000506762	6.86e-05	22.9217	2.56165	98.7241	0.793986	75.8024	2.68187	1.2758	0.165115
T2A;A64C	0.00163665	0.000173992	18.4053	1.76299	97.5495	2.02035	79.1442	2.68141	1.26786	0.159783
T2A;A64G	0.000347469	0.000121831	39.1604	4.77447	97.566	2.502	58.4056	5.39032	0.86782	0.225045
T2A;A64T	0.00068575	6.44e-05	23.3821	1.65131	97.0703	0.849631	73.6882	1.85707	1.35334	0.144517
T2A;G65A	3.17e-05	5.08e-06	62.0854	1.70341	99.0583	0.214147	36.9728	1.71682	0.833486	0.0672687
T2A;G65C	3.66e-05	6.63e-06	38.6583	3.75241	96.7232	0.52032	58.0649	3.78832	1.31455	0.211201
T2A;G65T	2.29e-05	4.41e-06	68.5529	2.46983	97.2931	0.293587	28.7402	2.48722	1.69312	0.307957
T2A;G66A	1.8e-05	1.06e-05	71.8641	3.58413	95.8994	0.894414	24.0353	3.69405	0.710732	0.243552
T2A;G66C	2.21e-05	2.71e-06	33.1325	2.6771	98.0892	0.294967	64.9567	2.69331	1.30373	0.130543
T2A;G66T	3.1e-05	2.44e-05	82.0437	2.08501	99.3455	1.53043	17.3018	2.5864	0.403992	0.147759
T2A;C67A	8.44e-06	9.4e-06	58.5933	6.28846	89.5112	2.05534	30.9179	6.61583	0.650669	0.437073
T2A;C67G	0.000293924	9.02e-05	22.2603	4.72676	89.7574	2.5047	67.4971	5.34937	1.49769	0.507383
T2A;C67T	8.98e-05	3.74e-05	51.7139	6.38681	87.957	2.05779	36.2431	6.71013	3.93084	4.00786
T2A;T68A	1.86e-05	5.76e-06	61.2996	4.1309	94.0021	0.655278	32.7025	4.18255	1.36277	0.392057
T2A;T68C	0.000111784	0.000221533	66.6212	10.7487	100	8.03253	33.3788	13.4185	0.462029	0.408091
T2A;T68G	0.000470254	0.000141599	15.961	4.61958	87.9586	3.50288	71.9976	5.79747	1.50447	0.598641
T2A;G69A	0.00066847	0.00140172	87.3967	2.53496	100	4.89457	12.6033	5.51207	0.431363	0.34294
T2A;G69C	2.43e-05	1.83e-05	91.2807	1.53177	97.2882	0.399659	6.00749	1.58305	1.18093	0.815261
T2A;G69T	0.000307099	0.000754893	95.5386	1.79406	100	1.92629	4.46143	2.63234	0.555662	0.747424
T2A;A70C	7.46e-05	6.01e-05	88.0508	1.83286	100	1.00454	11.9492	2.09008	0.484436	0.178326
T2A;A70G	0.000469355	8.72e-05	38.3497	2.86735	96.2184	1.22538	57.8687	3.11822	1.52637	0.338249
T2A;A70T	0.000619382	8.72e-05	48.0096	2.4282	99.1672	0.513792	51.1576	2.48196	1.73217	0.323295
T2A;A71C	0.000518929	0.000120809	39.8176	3.62779	99.3172	1.10809	59.4996	3.79325	1.13924	0.224565
T2A;A71G	0.000484589	8.86e-05	34.5328	2.97742	100	1.25106	65.4672	3.22957	0.985	0.148812
T2A;A71T	0.00173918	0.00028345	14.1893	1.98053	100	3.93663	85.8107	4.40676	0.90693	0.131145
T2A;A72C	0.000843348	0.000108879	37.6377	2.31542	98.1196	0.959444	60.4819	2.50633	1.42655	0.214463
T2A;A72G	0.000665955	0.000101766	36.8235	2.49109	98.2097	1.10387	61.3862	2.72471	1.38317	0.242613
T2A;A72T	0.000640025	0.000126272	37.7756	3.27066	99.0194	1.31361	61.2438	3.5246	1.21057	0.245482
T2C;T3A	0.000972128	0.000280313	16.3222	3.01018	78.9866	5.94192	62.6644	6.6609	1.50197	0.620168
T2C;T3C	0.0086024	0.0138137	31.0131	3.54621	85.6043	39.842	54.5912	39.9995	1.09818	0.913585
T2C;T3G	3.65e-05	3.61e-05	63.2466	7.01039	94.2344	2.81406	30.9878	7.5541	0.702381	0.386056
T2C;C4A	0.00270558	0.0115067	29.5146	4.56952	100	47.0127	70.4854	47.2342	0.345064	0.212789
T2C;C4G	1.25e-07	1.43271	68.9082	21.216	100	384.472	31.0918	385.057	2.28e-06	0.288208
T2C;C4T	0.00163899	0.00558828	18.3159	5.32729	100	43.511	81.6841	43.8359	0.356287	0.20598
T2C;A5C	0.000662574	0.0043259	41.749	8.39515	50.1075	14.7136	8.35846	16.9402	0.742601	3.50242
T2C;A5G	0.000791092	0.00144697	18.3357	5.15082	100	24.8583	81.6643	25.3863	0.39912	0.173141
T2C;A5T	0.0010889	0.00142002	6.05771	5.50964	84.3462	27.1756	78.2885	27.7285	0.736578	0.443918
T2C;G6A	4.4e-05	0.00104107	78.3151	3.68663	100	39.2127	21.6849	39.3856	0.151678	0.430891
T2C;G6C	9.89e-06	1.57e-05	74.573	5.44269	87.7835	1.95388	13.2105	5.78278	1.00592	1.65887
T2C;G6T	0.000154193	0.000317146	82.9098	5.24855	94.5771	3.25395	11.6673	6.1754	0.725142	0.917986
T2C;C7A	0.000133052	0.000104747	86.8062	1.22401	97.6544	1.2596	10.8482	1.75636	0.46569	0.161504
T2C;C7G	1.87e-05	2.44e-05	63.136	8.24119	94.9985	3.29807	31.8625	8.87663	0.557755	0.361562
T2C;C7T	2.87e-05	1.33e-05	62.3559	2.77847	92.3547	1.38866	29.9988	3.10616	0.609814	0.1705
T2C;C8A	0.00094529	9.65e-05	54.1845	1.57269	93.6173	0.772831	39.4328	1.75232	2.54737	0.582532
T2C;C8G	3.65e-05	2.76e-05	61.6011	6.17167	96.4502	2.03681	34.8491	6.49909	0.669731	0.261677
T2C;C8T	0.0010317	0.000134374	44.043	1.6712	92.4949	1.41003	48.4519	2.18657	1.46402	0.270427
T2C;G9A	0.0261846	0.0608541	9.18712	1.44394	100	122.665	90.8129	122.673	1.08465	0.595053
T2C;G9C	1.02e-05	0.00046907	10.1154	5.5206	12.8025	2.20145	2.68708	5.94335	4	902.837
T2C;G9T	0.0356307	2.74008	10.6393	1.09758	100	18220.9	89.3607	18220.9	3.7022	73.1818
T2C;G10A	0.0102174	0.0162759	15.5182	2.20158	100	41.986	84.4818	42.0436	0.66203	0.249456
T2C;G10C	0.00410487	0.00161763	22.3061	2.38753	53.2824	6.53568	30.9763	6.95812	2.51385	2.1773
T2C;G10T	0.0111416	0.00937566	9.24225	1.06305	52.3363	22.2665	43.0941	22.2919	1.50573	0.784023
T2C;A11C	0.0353225	0.13651	19.8581	1.92551	100	163.856	80.1419	163.867	0.936193	0.69998
T2C;A11G	0.000795307	0.000529046	36.419	5.81669	95.3432	9.31001	58.9243	10.9777	0.694628	0.311477
T2C;A11T	0.0362225	0.203396	10.2931	1.67461	100	488.716	89.7069	488.718	1.62617	2.33197
T2C;A12C	0.011738	0.00727515	8.96139	1.29096	39.222	16.1086	30.2606	16.1602	2.48442	2.11459
T2C;A12G	0.00146448	0.00160353	13.0707	4.08823	73.4524	17.8954	60.3817	18.3565	0.669073	0.322475
T2C;A12T	1.25e-07	5.96e-05	7.26561	2.18396	10.1597	1.29674	2.89409	2.53992	0.82965	85.3302
T2C;G13A	0.000399642	0.000103096	28.3941	2.81591	84.0165	2.75129	55.6224	3.93687	1.1531	0.289166
T2C;G13C	0.000845293	0.000363734	16.0004	2.60656	67.9837	6.71092	51.9833	7.19934	0.940741	0.330547
T2C;G13T	0.00497298	0.00985455	23.2718	3.03398	100	33.005	76.7282	33.1441	0.465498	0.176973
T2C;C14A	0.020685	405152	30.4348	6.8819	37.2836	27.2897	6.84882	28.1441	8.61e-08	1.14806
T2C;C14G	0.00694803	0.0271951	33.1545	2.62871	28.85	9.48634	-4.30447	9.84382	4	38.6312
T2C;C14T	0.0154058	394619	22.6481	5.61976	32.1813	7.73418	9.53315	9.5603	1.3e-08	0.246512
T2C;G15A	0.0767306	3699.87	12.8143	1.45732	100	1.63517e+07	87.1857	1.63517e+07	4	2866.44
T2C;G15C	0.0446109	2.04113	49.2395	3.27395	100	3179.38	50.7605	3179.38	2.03908	20.3306
T2C;G15T	NA	NA	NA	NA	NA	NA	NA	NA	NA	NA
T2C;G16A	0.0415311	10.7527	6.49001	1.02157	100	79275.8	93.51	79275.8	4	150.97
T2C;G16C	NA	NA	NA	NA	NA	NA	NA	NA	NA	NA
T2C;G16T	0.0174946	0.0672757	13.0425	1.18136	32.0128	92.6727	18.9703	92.6803	4	27.4698
T2C;G17A	0.0187503	0.104164	18.4229	2.10218	54.0503	270.761	35.6274	270.769	4	32.4806
T2C;G17C	NA	NA	NA	NA	NA	NA	NA	NA	NA	NA
T2C;G17T	0.0285385	0.108555	15.7988	2.18021	100	320.807	84.2012	320.814	1.84891	2.62437
T2C;A18C	0.0561648	1.84897	13.3906	1.73149	100	4195.95	86.6094	4195.95	2.00196	9.99309
T2C;A18G	0.103335	4.71866	19.869	1.59062	100	3931.58	80.131	3931.58	1.38619	5.46423
T2C;A18T	0.00209874	0.00513232	13.0064	1.799	15.8125	2.62892	2.80614	3.18553	4	23.2385
T2C;C19A	0.0730265	1.45619	32.4395	5.68438	100	415.123	67.5605	415.162	0.518179	1.02286
T2C;C19G	0.0146076	0.103227	16.3901	2.00485	20.8488	37.3656	4.45871	37.4193	4	94.1224
T2C;C19T	7.67e-07	32.7787	11.6067	5.92805	17.296	4066.89	5.68927	4066.89	3.35e-05	0.730054
T2C;G20A	2.06e-06	27.4589	31.7557	8.39809	48.1301	2918.5	16.3744	2918.52	2.67e-05	0.300825
T2C;G20C	NA	NA	NA	NA	NA	NA	NA	NA	NA	NA
T2C;G20T	2.5	251.166	37.3829	5.74986	92.5653	730.904	55.1824	730.927	0.207871	0.648453
T2C;A21C	0.00305711	0.00660878	15.8289	1.57921	12.651	2.86301	-3.17789	3.26966	4	20.9607
T2C;A21G	0.00233286	0.000385836	27.4272	1.47569	96.3045	3.69422	68.8774	3.97806	1.1054	0.167411
T2C;A21T	0.106187	1.80098	18.0565	1.94564	100	810.602	81.9435	810.604	0.855488	1.38162
T2C;C22A	NA	NA	NA	NA	NA	NA	NA	NA	NA	NA
T2C;C22G	2.5	146.386	11.1078	3.04847	77.2761	772.54	66.1683	772.546	0.286822	0.518706
T2C;C22T	0.061776	892.477	15.1925	3.41073	100	4.62425e+06	84.8075	4.62425e+06	4	1991.27
T2C;C23A	0.00370384	0.0179585	22.0083	2.59884	20.0582	4.58067	-1.9501	5.26654	4	56.8393
T2C;C23G	NA	NA	NA	NA	NA	NA	NA	NA	NA	NA
T2C;C23T	NA	NA	NA	NA	NA	NA	NA	NA	NA	NA
T2C;C24A	1.25e-07	9.17e-05	20.447	7.30489	26.4711	4.21165	6.02409	8.43204	0.826534	130.891
T2C;C24G	0.0414775	2.86213	31.251	3.53323	100	8395.45	68.749	8395.45	2.54642	39.8972
T2C;C24T	0.0071499	0.00369902	55.5096	2.68503	79.8427	6.8191	24.3331	7.32868	4	4.632
T2C;G25A	1.25e-07	3.41144	10.8108	4.21131	11.7929	11.1245	0.982062	11.895	2.28e-07	2.45204
T2C;G25C	0.0854189	1.07694	14.9917	1.42288	100	772.637	85.0083	772.638	1.04608	1.44942
T2C;G25T	0.0342052	2.70399	16.9336	1.08401	100	18675.4	83.0664	18675.4	4	86.9801
T2C;T26A	0.00403271	0.000436628	19.4837	1.10837	86.6064	3.15692	67.1227	3.34584	1.8341	0.299288
T2C;T26C	0.00124521	9.16e-05	24.3685	1.72408	90.616	1.32253	66.2475	2.17291	2.78338	0.637989
T2C;T26G	0.0077498	0.00673009	24.7198	3.01265	95.7831	27.6223	71.0633	27.7861	1.11927	0.558837
T2C;T27A	0.00332246	0.000790849	17.7723	2.49215	89.5937	6.49957	71.8214	6.96097	1.61046	0.469349
T2C;T27C	0.00171361	0.000148759	17.8139	1.11152	90.7699	1.77615	72.956	2.09527	1.40642	0.151326
T2C;T27G	NA	NA	NA	NA	NA	NA	NA	NA	NA	NA
T2C;T28A	0.00412631	0.000458429	21.9017	1.30423	90.2816	3.23497	68.38	3.48799	1.75435	0.288095
T2C;T28C	0.00392998	0.00118663	16.9146	2.50817	69.566	7.56862	52.6514	7.97339	2.34655	1.28763
T2C;T28G	0.0305051	0.264961	25.8057	4.56833	100	440.318	74.1943	440.342	1.25388	2.98843
T2C;T29A	0.00435073	0.000508609	20.8385	1.32147	87.7907	3.39595	66.9522	3.64401	1.76285	0.309064
T2C;T29C	0.000707266	0.000152144	54.4753	2.62202	94.9788	1.28746	40.5035	2.92105	1.74552	0.573672
T2C;T29G	0.00533871	0.00169889	14.3494	1.47443	41.4968	5.82456	27.1474	6.00828	2.67805	2.408
T2C;C30A	0.00915626	0.00559879	13.075	1.89696	86.2447	23.6631	73.1697	23.7391	1.39076	0.584885
T2C;C30G	0.0124465	0.0209174	8.65273	1.44991	54.4931	37.8215	45.8404	37.8492	1.08555	0.690256
T2C;C30T	0.003099	0.000320316	19.998	1.21673	81.1989	2.40949	61.2009	2.69927	2.31198	0.394986
T2C;C31A	0.0112066	0.0125542	9.65092	1.84734	66.8836	42.5242	57.2327	42.5643	1.92693	1.80314
T2C;C31G	0.00424075	0.000857869	16.1404	1.16932	88.7097	5.73128	72.5694	5.84935	1.21017	0.19344
T2C;C31T	0.0049811	0.00119568	14.725	1.50208	80.4647	7.49377	65.7397	7.64283	1.68864	0.472793
T2C;C32A	0.00157059	0.000234412	18.5761	1.78148	76.7327	3.36076	58.1566	3.80373	2.55904	0.88366
T2C;C32G	0.000591333	0.000190549	36.5841	3.93508	94.6047	3.46966	58.0206	5.24628	1.08363	0.357798
T2C;C32T	0.00204779	0.000404006	20.0646	2.75072	91.5646	3.6869	71.5	4.59997	1.9993	0.582396
T2C;T33A	0.00167449	0.00024757	19.8199	2.1634	89.6068	2.56619	69.7869	3.35643	1.85253	0.436717
T2C;T33C	0.0013807	0.000469782	39.6008	3.90425	91.9479	4.83957	52.3471	6.21809	1.26641	0.569353
T2C;T33G	2.49711	745.972	34.2126	8.77989	75.4868	986.023	41.2742	986.062	0.138121	1.15089
T2C;C34A	0.0016313	0.000184411	21.7968	1.48463	96.0199	2.10617	74.2231	2.57683	1.31068	0.174522
T2C;C34G	0.000967272	0.000264143	38.7719	3.15602	95.1479	3.94758	56.376	5.0541	0.920063	0.25765
T2C;C34T	0.00192095	0.000261655	23.6112	2.00379	91.3153	2.5684	67.704	3.25759	1.90481	0.40211
T2C;T35A	0.00149811	0.000179521	25.6979	1.68183	92.3104	2.0428	66.6125	2.64605	1.4782	0.239902
T2C;T35C	0.00129728	0.000138581	33.3292	1.54398	93.0866	1.53041	59.7575	2.17394	1.45143	0.223753
T2C;T35G	0.00119153	0.00022854	42.9148	2.60465	91.5835	2.02846	48.6687	3.30134	1.54939	0.420744
T2C;T36A	0.00216527	0.000679477	19.7686	2.56478	98.8725	7.7155	79.1038	8.13062	0.973094	0.244761
T2C;T36C	0.0324137	0.153591	8.66525	2.31343	100	236.749	91.3348	236.76	0.973713	0.876669
T2C;T36G	0.000242439	7.34e-05	40.9616	4.15708	94.1749	1.65195	53.2133	4.47328	1.0603	0.238039
T2C;T37A	0.00295138	0.00127982	17.4904	2.55066	95.8577	11.4735	78.3673	11.7536	0.991929	0.303545
T2C;T37C	0.0101691	0.014676	35.7659	4.34932	100	48.8951	64.2341	49.0882	1.26473	1.1553
T2C;T37G	0.000410145	0.000153791	27.1047	5.33344	90.6553	3.6855	63.5506	6.48294	1.05084	0.361221
T2C;C38A	0.00483932	0.00480119	11.8608	2.62434	100	27.798	88.1392	27.9216	0.771865	0.288043
T2C;C38G	0.00222067	0.00060076	15.0877	1.9713	94.5225	6.87778	79.4348	7.15471	0.933965	0.190696
T2C;C38T	0.00237262	0.000173216	14.3291	0.650996	82.4875	1.76472	68.1585	1.88097	1.8445	0.181153
T2C;A39C	0.00336407	0.00194891	21.8918	3.25646	100	14.9666	78.1082	15.3168	0.898854	0.337146
T2C;A39G	0.00268547	0.000511422	31.747	1.6461	78.8165	3.37786	47.0695	3.75761	1.95047	0.53755
T2C;A39T	0.00124361	0.000275918	24.1248	2.86649	90.6726	4.03099	66.5478	4.94627	1.19328	0.316688
T2C;T40A	0.00404936	0.00253989	15.6626	2.35755	94.8411	16.2754	79.1784	16.4453	0.821822	0.245591
T2C;T40C	0.00188013	0.00038716	22.8463	2.43308	88.8584	4.16508	66.0121	4.82367	1.65085	0.477252
T2C;T40G	0.00485444	0.00153608	20.1439	2.04021	87.5605	9.42728	67.4166	9.64552	1.4759	0.476603
T2C;T41A	0.00198951	0.000521225	23.789	2.75759	95.8349	5.77202	72.0459	6.39691	1.0571	0.272167
T2C;T41C	0.00200455	0.00025684	21.6395	1.05139	80.7294	2.5489	59.0899	2.75723	1.4367	0.224808
T2C;T41G	0.0067319	0.00311318	12.5935	2.01902	81.0482	16.2356	68.4547	16.3607	1.50965	0.61862
T2C;G42A	0.00257835	0.000690645	11.3308	2.50019	84.0425	7.28954	72.7117	7.70638	1.90352	0.690395
T2C;G42C	0.00140252	0.000297527	22.5305	2.13994	86.0611	4.03472	63.5306	4.56709	1.30299	0.347208
T2C;G42T	0.00200043	0.00038478	14.9682	1.77202	90.0135	4.71544	75.0454	5.0374	1.35595	0.281249
T2C;C43A	0.00420093	0.00102559	14.9723	1.86905	81.8086	6.72617	66.8364	6.98103	1.68881	0.48057
T2C;C43G	0.00608947	0.0019251	14.0203	1.03395	43.8609	5.95134	29.8406	6.04048	2.15733	1.21832
T2C;C43T	0.00164841	0.000166765	17.4629	1.18774	75.656	2.38004	58.1931	2.65995	2.90894	0.753369
T2C;G44A	0.0165756	0.0208649	10.069	1.06111	43.7102	51.396	33.6412	51.4069	4	10.4933
T2C;G44C	0.00115346	0.000323933	43.3317	2.72688	89.2974	3.77348	45.9656	4.65564	1.15279	0.394954
T2C;G44T	0.00382027	0.0024784	18.9248	3.49939	75.1924	14.8393	56.2676	15.2463	1.43222	0.878636
T2C;C45A	3.92e-07	13.551	13.0201	7.34009	24.6251	4788.88	11.605	4788.89	2.39e-05	0.464367
T2C;C45G	0.0249985	0.027006	10.6739	0.750856	100	59.5395	89.3261	59.5443	1.17325	0.346259
T2C;C45T	0.00561104	0.0196569	15.3724	5.09829	100	64.7209	84.6276	64.9214	0.466351	0.298864
T2C;G46A	9.96e-05	3.83e-05	39.1524	5.62452	88.9419	2.65734	49.7895	6.22067	1.40336	0.589415
T2C;G46C	0.00638265	0.00231285	26.0505	2.072	70.6465	9.85302	44.596	10.0685	2.19036	1.36445
T2C;G46T	2.5	286.087	38.1342	5.44643	100	1658.99	61.8658	1658.99	0.32846	1.22192
T2C;G47A	0.00257236	0.289899	43.4322	6.19468	100	322.031	56.5678	322.091	0.102174	0.520178
T2C;G47C	0.0149606	0.0287481	61.7703	0.881094	71.2006	21.5142	9.43033	21.5322	4	23.7725
T2C;G47T	2.5	419.576	57.6732	5.0474	100	498.989	42.3268	499.014	0.123842	0.561914
T2C;G48A	NA	NA	NA	NA	NA	NA	NA	NA	NA	NA
T2C;G48C	2.5	24481.8	80.2014	8.14277	100	3444.46	19.7986	3444.47	0.0349345	4.51729
T2C;G48T	NA	NA	NA	NA	NA	NA	NA	NA	NA	NA
T2C;G49A	0.0299539	0.18666	25.6563	1.83077	100	620.461	74.3437	620.464	2.37877	6.13674
T2C;G49C	0.0128914	0.00604097	10.5969	1.35277	29.6593	11.8576	19.0624	11.9345	4	8.846
T2C;G49T	0.0326134	6.763	10.3986	1.7271	40.5145	16997.4	30.1159	16997.4	4	264.65
T2C;A50C	NA	NA	NA	NA	NA	NA	NA	NA	NA	NA
T2C;A50G	0.0179956	0.0415804	23.6926	3.06484	100	110.652	76.3074	110.694	1.35619	1.37046
T2C;A50T	0.000140595	3909.44	15.9574	3.11897	13.6826	17.1767	-2.27489	17.4575	4.85e-07	1.04946
T2C;C51A	0.0240129	0.0982768	43.9892	1.51186	100	307.757	56.0108	307.761	2.76333	7.45382
T2C;C51G	1.98e-07	2.08645	42.268	8.22151	64.5983	19.5106	22.3302	21.1721	5.8e-08	0.16693
T2C;C51T	7.26e-07	19.4455	24.0492	16.4812	57.0048	6175.42	32.9556	6175.44	1.4e-05	0.28482
T2C;G52A	0.0268003	0.202391	33.8909	1.29014	100	827.607	66.1091	827.608	3.1079	12.7934
T2C;G52C	NA	NA	NA	NA	NA	NA	NA	NA	NA	NA
T2C;G52T	1.07e-05	0.000116031	16.5131	6.49804	25.1296	2.84062	8.6165	7.0918	4	286.228
T2C;A53C	0.0314704	1.51284	14.8109	1.25992	100	10634.9	85.1891	10634.9	3.96393	67.8468
T2C;A53G	0.0152446	0.018137	18.373	1.5565	100	47.0032	81.627	47.0289	1.03811	0.407808
T2C;A53T	6.87e-05	753.831	15.0485	2.60435	17.0705	3.73492	2.02193	4.55327	2.51e-08	0.186498
T2C;C54A	1.25e-07	1.7042	25.7576	8.88754	41.4974	27.3194	15.7398	28.7287	7.9e-08	0.333112
T2C;C54G	3.23e-07	9.63826	19.7916	9.17095	35.7006	566.367	15.909	566.442	2.38e-06	0.3683
T2C;C54T	NA	NA	NA	NA	NA	NA	NA	NA	NA	NA
T2C;C55A	NA	NA	NA	NA	NA	NA	NA	NA	NA	NA
T2C;C55G	2.5	3472.25	73.0099	11.5654	100	1707.37	26.9901	1707.41	0.0842244	2.63423
T2C;C55T	4.74e-05	9.22e-05	65.1845	9.77923	87.4046	4.94181	22.2201	10.9569	0.704299	0.802198
T2C;C56A	NA	NA	NA	NA	NA	NA	NA	NA	NA	NA
T2C;C56G	0.0160401	0.0295667	10.3228	1.84184	67.2898	70.047	56.967	70.0712	1.50527	1.37291
T2C;C56T	0.0113374	0.0231672	43.3172	2.7302	100	42.6112	56.6828	42.6986	0.798961	0.504759
T2C;T57A	0.0244218	0.0657875	18.5207	1.81343	100	88.5028	81.4793	88.5214	0.765	0.386124
T2C;T57C	0.0013834	0.000252211	16.7743	1.96955	76.0578	5.42212	59.2835	5.76875	2.40284	1.02812
T2C;T57G	0.00620797	0.0073885	15.4129	2.97225	70.3047	28.8894	54.8918	29.0418	1.19471	0.851119
T2C;G58A	0.0108518	0.182334	60.9422	9.19334	100	115.364	39.0578	115.73	0.346671	0.722843
T2C;G58C	0.000556262	0.00442378	62.6422	7.05002	96.2935	34.6636	33.6513	35.3733	0.285301	0.381077
T2C;G58T	0.00860702	0.0123735	72.1875	1.76483	100	15.8637	27.8125	15.9616	0.90065	0.591309
T2C;C59A	0.10025	1.93044	17.112	4.71671	100	477.992	82.888	478.015	0.487901	0.764014
T2C;C59G	0.108643	1.91672	15.5867	2.29461	100	785.05	84.4133	785.053	0.782662	1.25927
T2C;C59T	0.0202104	0.079923	22.1654	3.25589	100	88.7444	77.8346	88.8041	0.555137	0.357728
T2C;A60C	0.00812863	0.00823467	26.3086	2.84215	100	31.6023	73.6914	31.7298	1.06365	0.548734
T2C;A60G	0.00343504	0.00507344	11.3087	4.58185	100	37.9012	88.6913	38.1772	0.705819	0.382862
T2C;A60T	0.0171362	0.0348476	9.7634	1.97735	100	68.5458	90.2366	68.5743	0.744464	0.33384
T2C;G61A	0.00357571	0.00211263	20.8276	2.52437	100	14.736	79.1724	14.9506	0.833703	0.257491
T2C;G61C	0.000684898	0.000534056	33.5077	4.97635	98.6358	10.515	65.128	11.6331	0.545786	0.191293
T2C;G61T	0.00160054	0.000195122	20.9703	1.89036	86.6956	2.55691	65.7253	3.17982	2.30629	0.601653
T2C;A62C	0.00047938	0.000107867	58.1786	2.52932	98.9762	0.968599	40.7976	2.70844	1.06319	0.215095
T2C;A62G	0.00219728	0.000718728	61.9542	2.39209	85.6927	2.78486	23.7385	3.67118	4	3.94664
T2C;A62T	0.00100418	0.000618684	40.3133	7.04392	100	9.78534	59.6867	12.0569	0.775153	0.405188
T2C;G63A	0.00261824	0.000245772	18.0055	1.23126	91.152	2.09034	73.1465	2.42601	1.65987	0.210713
T2C;G63C	0.00183081	0.000185406	17.6905	1.69655	95.184	1.81289	77.4935	2.48291	1.62926	0.223867
T2C;G63T	0.00129584	4.71e-05	7.79812	0.466016	93.6442	0.736344	85.8461	0.87142	1.58092	0.0814638
T2C;A64C	0.00195833	0.000214155	15.0315	1.7083	94.214	2.26364	79.1825	2.83591	1.50241	0.210948
T2C;A64G	0.00098518	0.000221783	48.5208	2.20012	96.405	2.76943	47.8841	3.53698	0.866938	0.187843
T2C;A64T	0.00142178	0.000137036	15.2468	1.88338	91.6618	1.69654	76.415	2.53483	2.31432	0.460037
T2C;G65A	0.000744592	6.05e-05	15.4338	1.71981	94.6214	1.00851	79.1876	1.9937	2.0383	0.284116
T2C;G65C	0.0014318	0.0002075	7.52325	1.94386	92.4394	2.90446	84.9161	3.49492	1.66095	0.354102
T2C;G65T	0.00118146	0.000149456	11.2008	1.93878	94.5052	2.13755	83.3044	2.88583	1.35173	0.229339
T2C;G66A	0.00081181	0.000108017	16.4524	2.56313	93.4186	1.76779	76.9662	3.11363	1.78119	0.381392
T2C;G66C	0.000215378	2.11e-05	17.3648	1.85419	96.08	0.577853	78.7152	1.94215	1.63036	0.150418
T2C;G66T	0.000725392	0.000121531	27.1958	2.82317	97.1987	1.62815	70.0029	3.25901	1.34753	0.272987
T2C;C67A	0.000518066	0.000371164	38.4542	7.60567	95.7273	8.38433	57.2731	11.32	0.726345	0.388379
T2C;C67G	0.00066532	0.000478124	16.5205	6.50831	78.3911	11.0855	61.8705	12.8548	0.951763	0.589611
T2C;C67T	0.000866281	0.000501767	44.6788	4.45225	83.6202	6.64163	38.9414	7.99586	1.24839	0.952336
T2C;T68A	0.000844234	0.000246965	31.3078	4.57515	97.174	3.49229	65.8662	5.75571	1.20598	0.445887
T2C;T68C	0.000955245	0.000293828	13.3675	3.06779	100	6.23137	86.6325	6.94559	0.696016	0.135865
T2C;T68G	0.0115912	0.0286748	7.86514	4.4087	100	108.867	92.1349	108.956	1.16234	1.14883
T2C;G69A	0.0011376	0.000160334	43.3501	2.32736	95.6618	1.39865	52.3118	2.7153	1.85131	0.422433
T2C;G69C	0.000938093	0.000287123	40.063	5.86017	98.7783	1.76154	58.7153	6.1192	1.56879	0.690315
T2C;G69T	0.00103781	0.000123441	43.1704	2.38233	94.2127	1.22046	51.0423	2.67675	2.98557	0.999485
T2C;A70C	0.00103974	0.000128798	17.005	2.47481	93.1175	1.70184	76.1125	3.00349	2.1435	0.464286
T2C;A70G	0.000824249	0.00018797	28.742	3.59382	91.8169	3.09828	63.0749	4.74498	1.6657	0.559652
T2C;A70T	0.00139555	0.000175186	33.205	2.60827	97.7376	1.15158	64.5326	2.85118	2.19708	0.486776
T2C;A71C	0.00210233	0.000249348	19.6486	1.9521	98.2374	2.23601	78.5887	2.96823	1.48084	0.237077
T2C;A71G	0.00850688	0.00637346	10.7158	2.02822	100	26.5674	89.2842	26.6447	0.919587	0.287786
T2C;A71T	0.00159972	0.000131532	15.8282	1.06917	90.8679	1.77631	75.0398	2.07326	1.45492	0.155376
T2C;A72C	0.00155866	0.000160043	17.8988	1.88463	93.7004	1.63121	75.8016	2.49252	1.7128	0.251655
T2C;A72G	0.00128574	0.000124953	19.8123	1.73177	99.8278	1.37955	80.0154	2.21409	1.25269	0.14309
T2C;A72T	0.0013559	0.000137911	26.8561	2.01012	91.5091	1.55609	64.653	2.54205	2.57761	0.647324
T2G;T3A	0.000439573	7.11e-05	21.0035	1.98093	84.8238	1.91755	63.8203	2.75701	1.21798	0.196743
T2G;T3C	0.000796808	0.000175455	31.393	3.87371	94.0392	2.70701	62.6462	4.72584	1.77588	0.632972
T2G;T3G	0.000459421	9.5e-05	23.4059	2.95505	97.8564	2.42957	74.4505	3.82559	0.844769	0.130965
T2G;C4A	0.000540199	0.000136842	30.9394	2.96887	83.1369	3.59364	52.1974	4.66138	1.69453	0.733422
T2G;C4G	4.87e-05	3.1e-05	67.124	3.3378	91.652	1.75201	24.528	3.76967	0.623758	0.224065
T2G;C4T	0.000176232	9.75e-05	34.0872	5.07216	88.0622	4.67078	53.975	6.89514	0.665296	0.208597
T2G;A5C	0.00132898	8538.85	66.7801	8.87137	100	10.4666	33.2199	13.7205	3.28e-08	0.161765
T2G;A5G	0.00832714	0.00751743	77.2687	1.79959	86.5399	4.75597	9.27121	5.08506	4	7.90259
T2G;A5T	0.000147867	0.000124417	8.47716	5.09742	64.3378	9.90764	55.8606	11.142	1.03546	0.685918
T2G;G6A	0.000580373	0.000422331	88.697	1.0884	94.7203	0.951427	6.02334	1.44562	1.11198	0.930533
T2G;G6C	NA	NA	NA	NA	NA	NA	NA	NA	NA	NA
T2G;G6T	0.0182968	0.147209	85.6802	1.78421	100	31.6037	14.3198	31.654	0.533153	0.780327
T2G;C7A	0.000139723	0.000193642	57.1739	5.67506	71.2656	3.55243	14.0916	6.69523	4	43.1259
T2G;C7G	1.42e-05	4.91e-05	73.3196	8.88815	82.7735	3.63661	9.45393	9.60333	0.864405	2.65813
T2G;C7T	0.00265758	0.00608587	59.6126	5.55889	100	23.3433	40.3874	23.996	0.554183	0.474841
T2G;C8A	0.000500883	0.000250927	74.2684	3.68561	95.5939	1.86055	21.3255	4.1286	2.08399	1.88301
T2G;C8G	0.000619391	0.000809645	73.2924	3.89242	81.8558	4.25595	8.56334	5.7675	4	17.2204
T2G;C8T	0.000722721	0.000225997	62.0576	3.35019	92.5009	1.84614	30.4433	3.82518	2.07751	1.12346
T2G;G9A	0.00859446	0.00284668	12.5352	1.01708	83.3446	12.3471	70.8094	12.3889	1.35602	0.304709
T2G;G9C	0.0184965	0.060719	13.1912	1.05836	41.0603	123.208	27.8691	123.213	4	19.9368
T2G;G9T	0.0225823	0.0247726	13.8662	1.03343	100	61.5324	86.1338	61.541	1.28874	0.481756
T2G;G10A	0.00912334	0.00403382	28.1502	2.30578	100	18.121	71.8498	18.2671	1.48937	0.604277
T2G;G10C	0.00997179	0.00431939	31.2883	2.35569	70.4725	13.0307	39.1842	13.2419	2.51057	1.98495
T2G;G10T	0.0107168	0.00783343	14.6102	1.51928	81.2705	24.8694	66.6603	24.9158	1.2225	0.462112
T2G;A11C	0.066227	0.55092	22.8714	2.23548	100	252.752	77.1286	252.762	0.656299	0.617829
T2G;A11G	0.000212182	0.000111696	42.3476	5.58807	93.5035	3.53293	51.156	6.61121	0.708734	0.219717
T2G;A11T	0.008672	0.00324985	13.1502	0.757027	82.3355	11.2168	69.1854	11.2423	1.05405	0.17794
T2G;A12C	0.0264933	0.0653941	13.7528	1.81374	100	176.811	86.2472	176.82	1.58459	1.42805
T2G;A12G	0.0021463	0.000522804	22.6194	2.43059	89.0039	5.28846	66.3845	5.82027	1.30903	0.367647
T2G;A12T	0.0094609	0.00339481	12.5354	1.14887	32.5104	5.55216	19.975	5.66978	4	3.18995
T2G;G13A	9.44e-05	4.39e-05	70.4331	2.12794	92.5692	1.24087	22.1361	2.46331	0.675657	0.185735
T2G;G13C	0.00102144	0.000376105	24.0875	3.31304	78.6097	5.80908	54.5222	6.68742	1.06366	0.435384
T2G;G13T	0.000716068	0.0001182	40.419	1.52439	86.4368	1.84855	46.0177	2.39602	0.97585	0.168293
T2G;C14A	0.0222499	0.216137	81.5931	2.09215	59.2675	80.975	-22.3255	81.002	0.714357	1.3157
T2G;C14G	NA	NA	NA	NA	NA	NA	NA	NA	NA	NA
T2G;C14T	0.0155474	0.133205	48.1955	3.21254	59.5525	114.921	11.357	114.966	4	90.7499
T2G;G15A	0.000255127	0.00264504	20.1803	2.36038	18.6084	1.94402	-1.57183	3.05788	4	59.7664
T2G;G15C	0.0214718	0.0266949	44.7154	1.14895	100	46.4608	55.2846	46.4751	1.36852	0.698572
T2G;G15T	0.0136086	0.00433705	20.5886	1.03341	62.7467	12.997	42.1581	13.038	2.55562	1.3345
T2G;G16A	1.25e-07	3.15501	14.8649	6.68476	25.9942	21.5076	11.1294	22.5225	1.87e-08	0.385883
T2G;G16C	1.25e-07	1.11247	37.3563	4.59752	51.479	15.7986	14.1226	16.454	7.81e-08	0.178619
T2G;G16T	0.0166777	0.0408298	24.3813	1.74778	54.8005	90.9967	30.4192	91.0135	4	20.3393
T2G;G17A	1.28e-06	62.1956	35.8023	14.3775	50.5906	694.247	14.7883	694.396	1.94e-06	0.521307
T2G;G17C	1.25e-07	9.27e-05	71.0566	5.63484	83.3772	339.138	12.3206	339.185	0.0661829	3.23208
T2G;G17T	0.00769081	0.00241736	35.3925	1.83245	66.3967	5.94557	31.0042	6.22155	3.59716	2.26015
T2G;A18C	2.91e-07	15.5628	14.4928	6.84984	17.2008	22.5424	2.70809	23.5602	5.99e-08	1.8044
T2G;A18G	0.0106244	0.00456002	18.1699	0.771755	25.608	3.09683	7.43809	3.19154	4	6.72898
T2G;A18T	0.00953392	0.0465292	13.96	1.49606	22.8473	20.6851	8.88737	20.7391	1.08973	2.66121
T2G;C19A	2.5	870.64	60.8826	6.82806	92.3829	718.331	31.5003	718.363	0.116475	1.06868
T2G;C19G	NA	NA	NA	NA	NA	NA	NA	NA	NA	NA
T2G;C19T	0.0123937	0.0030206	31.1487	1.78151	63.2315	11.5957	32.0828	11.7318	4	6.95775
T2G;G20A	0.0333069	0.344939	64.3775	2.1247	100	335.212	35.6225	335.218	1.61229	5.31727
T2G;G20C	0.0666344	0.69411	24.3339	2.71995	100	366.279	75.6661	366.289	0.756178	0.979122
T2G;G20T	0.0330445	0.15026	57.6704	1.57239	100	112.521	42.3296	112.532	1.05895	1.14834
T2G;A21C	0.0388535	0.858842	15.5828	1.63637	100	3281.4	84.4172	3281.4	2.60557	14.7057
T2G;A21G	0.00243549	0.000266031	39.8656	1.49822	88.4391	1.50452	48.5735	2.12327	2.34399	0.455885
T2G;A21T	0.00694658	0.00227522	19.1667	1.28117	44.0017	4.62722	24.835	4.80131	4	3.22807
T2G;C22A	2.5	891.301	44.8126	9.28482	87.0614	995.436	42.2488	995.479	0.117619	1.11314
T2G;C22G	NA	NA	NA	NA	NA	NA	NA	NA	NA	NA
T2G;C22T	1.27e-05	91.5484	32.5893	3.91642	44.521	17.918	11.9317	18.341	4.6e-07	0.202312
T2G;C23A	0.0313704	8.90264	52.058	3.96541	100	35632.6	47.942	35632.6	4	406.562
T2G;C23G	0.00258741	0.00266757	82.2946	1.45179	77.8289	2.43066	-4.46567	2.83122	4	16.2271
T2G;C23T	0.560318	51.5722	39.7866	5.7034	100	1845.33	60.2134	1845.34	0.471213	2.101
T2G;C24A	0.0150574	101378	61.9792	6.82101	74.5059	8.82345	12.5267	11.1525	1.49e-08	0.066679
T2G;C24G	2.5	245113	66.2924	4.21969	80.477	10184.7	14.1846	10184.7	0.0146	9.27219
T2G;C24T	1.25e-07	1.183	70.3704	6.9146	82.0767	15.41	11.7063	16.8902	8.03e-08	0.236546
T2G;G25A	0.0576448	0.52597	22.4865	1.59607	100	577.934	77.5135	577.936	1.253	1.80943
T2G;G25C	0.0589257	0.282459	17.0275	0.903342	100	295.126	82.9725	295.128	1.14792	0.824938
T2G;G25T	0.0123617	0.00161185	32.2632	1.06139	66.523	6.72085	34.2598	6.80414	4	3.78378
T2G;T26A	0.0022132	0.000361668	29.6783	2.03508	89.3411	2.95899	59.6628	3.59126	1.42865	0.297237
T2G;T26C	0.000751464	8.39e-05	32.2941	2.04633	92.5588	1.07684	60.2647	2.31237	1.79149	0.313854
T2G;T26G	0.00336692	0.000593823	41.1463	2.04264	88.9271	2.95788	47.7808	3.59464	1.84293	0.532362
T2G;T27A	0.00281357	0.000168827	24.0524	0.85519	95.1677	1.32565	71.1153	1.57756	1.46725	0.111871
T2G;T27C	0.00137837	0.000200377	38.9692	2.53132	93.6684	1.65677	54.6991	3.02531	1.80214	0.426969
T2G;T27G	0.0257481	0.124407	18.9311	3.54948	100	141.425	81.0689	141.47	0.679587	0.595952
T2G;T28A	0.0030138	0.000302568	28.3351	1.48282	89.9448	1.97837	61.6097	2.47239	1.82884	0.286992
T2G;T28C	0.0037785	0.000622569	30.1286	2.31438	85.0567	3.72426	54.9281	4.3848	2.30821	0.835926
T2G;T28G	8.76e-05	0.000659925	54.717	6.15788	77.8692	22.257	23.1523	23.0931	0.27858	0.523538
T2G;T29A	0.00370092	0.000388432	19.9187	1.16955	89.6231	2.71055	69.7044	2.9521	1.5357	0.201579
T2G;T29C	0.00117482	0.000409643	51.948	3.52115	93.8268	3.78876	41.8788	5.17236	1.10891	0.455124
T2G;T29G	0.00698073	0.00111056	18.2159	1.08092	62.1793	4.36825	43.9634	4.5	2.62431	0.789795
T2G;C30A	0.00386454	0.00050116	18.9296	1.39144	89.151	3.64103	70.2214	3.89785	1.57695	0.263834
T2G;C30G	0.00431445	0.000670383	15.7809	1.47391	82.0637	4.63238	66.2828	4.8612	1.68391	0.367716
T2G;C30T	0.00216604	0.000163264	20.574	1.10854	91.7045	1.58698	71.1305	1.93581	1.59567	0.162473
T2G;C31A	0.00421089	0.0010031	14.5559	1.76848	87.8632	7.1595	73.3072	7.37469	1.42679	0.347172
T2G;C31G	0.00229308	0.000492172	19.3418	2.45125	91.9406	4.94539	72.5988	5.51955	1.1954	0.286651
T2G;C31T	0.00214407	0.000295836	18.8213	2.09142	89.2546	2.68712	70.4332	3.40509	1.81821	0.356434
T2G;C32A	0.000899601	0.000106223	21.8198	2.00142	94.1136	1.45779	72.2938	2.47605	1.49625	0.240788
T2G;C32G	0.00128461	0.000136648	34.0325	2.49449	89.3903	2.29897	55.3578	3.3923	4	2.42726
T2G;C32T	0.00107451	0.000156594	20.1624	2.49388	93.0375	2.34443	72.8751	3.42283	1.42159	0.287411
T2G;T33A	0.00143573	0.000182679	29.7748	2.23703	93.0171	1.67418	63.2423	2.79413	1.79031	0.355016
T2G;T33C	0.0068892	0.0125444	39.1774	3.83227	100	34.4687	60.8226	34.6811	0.685761	0.423275
T2G;T33G	NA	NA	NA	NA	NA	NA	NA	NA	NA	NA
T2G;C34A	0.00132623	0.000145928	28.8356	2.1286	95.0063	1.24442	66.1707	2.46567	1.86667	0.31479
T2G;C34G	0.00131526	0.000211847	44.4466	2.38654	92.8615	1.67815	48.4149	2.91749	1.72273	0.437157
T2G;C34T	0.00125884	0.000102554	24.1956	1.58165	93.016	1.11833	68.8203	1.93708	1.96681	0.28625
T2G;T35A	0.00147773	8.25e-05	29.5169	0.981957	93.5137	0.766709	63.9968	1.24583	1.72146	0.144149
T2G;T35C	0.00245047	0.000543813	36.4454	2.76084	90.3548	3.62095	53.9094	4.5534	1.70755	0.545068
T2G;T35G	0.00399428	0.00226261	48.3569	2.8959	85.5971	8.9845	37.2402	9.43968	1.31229	0.807513
T2G;T36A	0.00164732	0.000342435	24.1576	2.34057	93.626	4.38812	69.4684	4.97332	1.03014	0.219548
T2G;T36C	0.0257739	0.111595	16.8731	3.06448	100	131.755	83.1269	131.79	0.691975	0.53134
T2G;T36G	0.000866134	0.000553545	32.7367	4.59421	94.1319	9.24204	61.3951	10.321	0.630664	0.231175
T2G;T37A	0.00211989	0.000457071	22.0947	2.49287	95.089	4.84277	72.9943	5.44672	1.21456	0.289874
T2G;T37C	0.00257148	0.00119857	67.4003	2.1705	91.1557	3.91646	23.7554	4.4777	1.48496	0.85837
T2G;T37G	0.00210119	0.000807731	34.213	3.39037	91.5	6.90644	57.287	7.69373	1.16426	0.481124
T2G;C38A	0.00289733	0.00236356	16.0366	4.33494	100	21.7013	83.9634	22.13	0.808417	0.383616
T2G;C38G	0.00184411	0.000246437	26.8138	2.26526	91.5976	2.19572	64.7838	3.15477	1.73754	0.354976
T2G;C38T	0.00183919	0.000347241	19.5304	1.9711	90.7029	4.14085	71.1725	4.58605	1.21664	0.259228
T2G;A39C	0.00158296	0.00019301	37.104	1.51137	87.1981	1.68771	50.0942	2.26552	1.69965	0.317169
T2G;A39G	0.00228715	0.00040999	37.2651	2.30445	89.1691	2.85916	51.904	3.67223	1.81309	0.483211
T2G;A39T	0.00275361	0.000550749	23.1782	2.0911	88.8882	4.34649	65.7101	4.82335	1.38635	0.321182
T2G;T40A	0.0016861	0.000497316	20.9886	2.88769	91.7409	6.48064	70.7523	7.09489	1.02829	0.295159
T2G;T40C	0.00177064	0.00020398	25.637	1.62892	84.658	2.12942	59.0209	2.68101	2.05925	0.412603
T2G;T40G	0.0019302	0.000275068	23.0299	1.83724	86.7918	2.59387	63.7619	3.17862	1.52156	0.284776
T2G;T41A	0.0024974	0.000547639	32.2653	2.36316	94.7795	4.57613	62.5142	5.15029	1.18528	0.283654
T2G;T41C	0.00230035	0.000530773	26.9462	2.11609	92.0208	5.07814	65.0746	5.5014	1.09024	0.2446
T2G;T41G	0.00286049	0.000146264	21.6872	0.721944	81.0891	0.979559	59.4019	1.21686	2.48292	0.228329
T2G;G42A	0.00199184	6.54e-05	20.7018	0.445571	91.545	0.649139	70.8432	0.787347	1.4542	0.0621471
T2G;G42C	0.00230324	0.000292079	25.7587	1.82379	92.2052	2.42231	66.4464	3.03212	1.61509	0.284713
T2G;G42T	0.00163181	0.000187628	23.6571	1.61771	92.3098	2.08104	68.6527	2.63585	1.45824	0.227624
T2G;C43A	0.00344549	0.000506398	20.6889	1.35566	83.5625	3.58508	62.8737	3.83283	1.52308	0.270731
T2G;C43G	0.00672618	0.00137667	20.4925	1.5553	63.9373	5.11993	43.4448	5.35095	3.58773	1.87862
T2G;C43T	0.00158314	0.00013448	20.4419	1.22776	89.8065	1.59608	69.3646	2.01367	1.50801	0.179457
T2G;G44A	0.0300033	0.0750514	13.6069	1.44475	100	191.053	86.3931	191.058	1.61029	1.30586
T2G;G44C	0.00735384	0.0247005	60.3184	4.20358	100	36.8653	39.6816	37.1042	0.574376	0.533582
T2G;G44T	0.0109229	0.0153252	27.7059	2.45338	100	36.4348	72.2941	36.5173	0.77255	0.33189
T2G;C45A	0.000184102	0.00568386	36.0959	5.95309	42.3989	25.9188	6.30297	26.5937	0.30436	2.0532
T2G;C45G	1.25e-07	2.6367	16.0839	11.0055	50.1038	109.759	34.0199	110.31	2.68e-07	0.214567
T2G;C45T	0.00568209	0.0103956	32.4543	3.79413	100	31.5488	67.5457	31.7761	0.55015	0.268845
T2G;G46A	3.44e-05	9.95e-06	52.3929	3.31903	92.2012	0.913613	39.8083	3.44248	0.946524	0.200467
T2G;G46C	NA	NA	NA	NA	NA	NA	NA	NA	NA	NA
T2G;G46T	2.5	42221.2	74.8953	4.34766	88.6627	3103.42	13.7674	3103.42	0.0264386	4.78067
T2G;G47A	NA	NA	NA	NA	NA	NA	NA	NA	NA	NA
T2G;G47C	9.36e-06	0.000260937	79.3331	5.398	85.247	1.69759	5.91398	5.65864	4	387.013
T2G;G47T	NA	NA	NA	NA	NA	NA	NA	NA	NA	NA
T2G;G48A	NA	NA	NA	NA	NA	NA	NA	NA	NA	NA
T2G;G48C	2.5	6417.76	85.7468	4.14627	100	1049.69	14.2532	1049.7	0.0552176	2.55332
T2G;G48T	NA	NA	NA	NA	NA	NA	NA	NA	NA	NA
T2G;G49A	1.25e-07	2.38007	29.6	9.73703	47.065	48.4655	17.465	49.4339	2.28e-07	0.319908
T2G;G49C	0.0326242	0.194612	31.8531	2.19042	100	383.786	68.1469	383.792	1.67201	3.19455
T2G;G49T	0.000346589	0.00103134	16.611	1.85347	22.2319	1.79648	5.62085	2.58122	4	31.1721
T2G;A50C	7.35e-06	154.912	47.6684	14.6152	55.9823	29.5801	8.31387	32.9937	1.52e-07	0.852175
T2G;A50G	0.0105543	0.00294397	36.7228	2.74097	71.6091	8.38631	34.8862	8.82288	4	5.11511
T2G;A50T	0.000104112	0.000175895	13.5557	4.48022	19.3195	2.68228	5.76389	5.22178	4	22.4854
T2G;C51A	2.5	468.543	43.6032	12.4076	100	1302.4	56.3968	1302.46	0.197756	1.16115
T2G;C51G	0.0563115	0.976119	48.6199	2.9993	100	581.22	51.3801	581.227	1.04645	2.88576
T2G;C51T	0.027037	0.842741	69.2724	1.36426	100	1869.5	30.7276	1869.51	3.57834	60.9162
T2G;G52A	0.0131796	0.0532478	48.4963	5.35899	100	85.3175	51.5037	85.4857	0.881163	1.22068
T2G;G52C	0.0125201	0.0304781	36.7089	3.7938	100	63.1562	63.2911	63.2701	0.898453	0.766265
T2G;G52T	0.106903	3.9252	40.3496	8.5756	100	464.669	59.6504	464.748	0.362535	0.979127
T2G;A53C	0.0171271	0.0210407	10.7825	1.54917	61.4534	52.092	50.6709	52.115	1.89845	1.66778
T2G;A53G	0.00524473	0.000535785	18.3166	0.69139	85.1352	3.15283	66.8186	3.22775	1.4188	0.146446
T2G;A53T	0.010239	0.00841146	14.2913	1.42159	22.2831	5.95743	7.99184	6.1247	4	9.91162
T2G;C54A	0.0422229	0.544597	32.179	1.68219	100	1122.54	67.821	1122.54	1.97518	6.03123
T2G;C54G	0.0185276	0.14994	15.6789	1.91919	34.1929	202.271	18.514	202.28	4	48.9895
T2G;C54T	0.000835657	0.00225973	15.2357	1.69463	17.2347	1.93566	1.99896	2.57265	3.07399	16.7133
T2G;C55A	2.5	1059.52	67.4258	3.46526	96.1998	510.533	28.774	510.544	0.0786398	0.746511
T2G;C55G	NA	NA	NA	NA	NA	NA	NA	NA	NA	NA
T2G;C55T	0.00925433	0.0109972	35.2835	3.07549	100	33.2211	64.7165	33.3631	1.01484	0.596269
T2G;C56A	0.0215331	0.0895476	25.0137	3.8673	100	151.791	74.9863	151.84	0.964613	1.1044
T2G;C56G	0.0179338	0.0169457	18.2655	1.72575	100	60.2571	81.7345	60.2818	1.7482	1.07001
T2G;C56T	0.0154525	0.0290041	17.3008	2.28715	100	60.6899	82.6992	60.733	0.806803	0.398241
T2G;T57A	0.0181142	0.0351471	14.5967	2.16952	100	77.6987	85.4033	77.729	0.963882	0.543301
T2G;T57C	0.000920995	0.000153783	16.7145	2.12044	90.7158	2.86402	74.0012	3.56355	1.24725	0.257905
T2G;T57G	0.0235703	0.0331734	17.8888	1.21205	100	56.9086	82.1112	56.9215	0.955334	0.33392
T2G;G58A	0.00178658	0.00173744	43.3052	4.75187	100	13.8433	56.6948	14.6362	0.565773	0.252524
T2G;G58C	0.00228189	0.00553681	38.6744	5.23819	100	27.4023	61.3256	27.8984	0.403199	0.218376
T2G;G58T	0.00556815	0.0053068	35.3416	3.62348	100	22.3007	64.6584	22.5932	0.874546	0.436901
T2G;C59A	0.000739244	0.000158032	50.9119	2.25175	93.5049	1.67434	42.5931	2.80602	1.08897	0.258072
T2G;C59G	0.000902291	0.000235735	43.9481	3.33626	85.3179	2.36744	41.3698	4.0909	1.85166	0.849392
T2G;C59T	0.00157743	0.00103477	43.5522	3.81789	100	9.67525	56.4478	10.4013	0.603634	0.208913
T2G;A60C	0.00467778	0.0165661	52.6594	4.38348	100	32.46	47.3406	32.7547	0.403103	0.269472
T2G;A60G	0.000864332	0.000160296	18.7389	2.44837	84.2576	2.99155	65.5187	3.86573	1.27384	0.311009
T2G;A60T	0.00549954	0.00122799	20.5444	1.60534	64.7808	5.83174	44.2364	6.04867	2.26065	1.07085
T2G;G61A	0.000924961	0.000143113	29.3005	2.11425	85.4359	2.19942	56.1354	3.05082	1.3867	0.321044
T2G;G61C	0.00131005	0.000476048	23.028	3.34186	100	7.52199	76.972	8.23094	0.699057	0.166058
T2G;G61T	0.0014889	0.000270408	29.34	2.17302	94.6127	3.32662	65.2726	3.97346	1.06094	0.210625
T2G;A62C	0.000534298	5.46e-05	40.3454	1.97398	95.4137	0.731038	55.0682	2.105	2.16263	0.371772
T2G;A62G	0.00294059	0.000784185	52.0094	2.19897	90.4453	3.45021	38.4359	4.09138	1.59228	0.593777
T2G;A62T	0.00370885	0.000704477	28.814	1.2711	97.528	4.73303	68.714	4.90074	0.980086	0.139083
T2G;G63A	0.00318232	0.000362832	17.2044	1.25538	88.6915	2.96533	71.4871	3.22012	1.45623	0.194239
T2G;G63C	0.00264415	0.000255968	17.1957	1.53518	92.6736	2.02585	75.4779	2.54182	1.79132	0.247719
T2G;G63T	0.00177285	0.000121655	9.2281	0.964062	92.8612	1.37784	83.6331	1.68162	1.60189	0.144016
T2G;A64C	0.00231093	0.000121164	17.7822	0.926066	91.0001	0.983665	73.218	1.351	1.98748	0.154546
T2G;A64G	0.000537395	5.65e-05	34.8543	1.44307	96.159	0.982387	61.3047	1.74572	0.9444	0.0892191
T2G;A64T	0.00172796	0.000229175	18.9896	2.11569	95.2915	2.64288	76.3019	3.3854	1.34884	0.226812
T2G;G65A	0.000146036	1.97e-05	25.1462	2.27772	97.1682	0.670034	72.022	2.37423	1.03957	0.0944863
T2G;G65C	0.000485363	5.97e-05	17.4133	2.35777	94.3782	1.10663	76.9648	2.60456	2.0227	0.381025
T2G;G65T	0.000134039	1.52e-05	26.5649	2.28435	96.7497	0.484694	70.1848	2.33521	1.36621	0.12168
T2G;G66A	7.4e-05	2.23e-05	41.3302	4.79797	97.7967	0.938754	56.4665	4.88894	0.926551	0.160495
T2G;G66C	0.000105623	1.56e-05	26.4108	3.94248	96.6422	0.817594	70.2314	4.02636	2.38855	0.608991
T2G;G66T	5.34e-05	2.09e-05	80.14	2.01943	96.658	0.511381	16.5179	2.08317	0.96678	0.271183
T2G;C67A	0.000103073	2.46e-05	88.5934	0.514999	96.7332	0.206853	8.13981	0.554988	0.94886	0.158939
T2G;C67G	0.000302148	0.000174185	54.3962	4.94783	93.384	3.20807	38.9878	5.89684	0.834799	0.339337
T2G;C67T	8.1e-05	5.02e-05	78.1076	2.62318	97.9904	1.19366	19.8829	2.882	0.620764	0.192217
T2G;T68A	0.000111862	9.55e-05	88.0678	1.9965	97.4105	0.785448	9.34268	2.14545	0.824915	0.423686
T2G;T68C	0.000211647	7.22e-05	72.5026	2.30497	95.1327	0.812414	22.6301	2.44395	1.99596	0.782915
T2G;T68G	0.000635262	0.000153584	32.7553	2.80013	89.6718	2.94245	56.9165	4.06186	1.07703	0.284491
T2G;G69A	0.000121547	0.000109893	88.2834	2.00975	97.5069	0.896019	9.22352	2.20044	0.781771	0.422273
T2G;G69C	2.95e-05	1.92e-05	86.7752	2.46055	97.7552	0.551357	10.98	2.52157	1.09561	0.633207
T2G;G69T	0.00118625	0.000239753	93.5011	0.443897	97.5819	0.335968	4.08079	0.556703	4	5.15877
T2G;A70C	0.000286652	9.59e-05	43.7862	4.48897	97.4307	1.19742	53.6444	4.64593	1.33048	0.344424
T2G;A70G	0.000835215	0.000119765	42.1184	2.81177	94.4163	1.23929	52.2979	3.07277	2.40109	0.660117
T2G;A70T	0.000919508	8.63e-05	53.1334	1.64861	95.1813	0.657933	42.0479	1.77505	2.57244	0.512106
T2G;A71C	0.0117071	0.00582629	11.5258	1.25551	69.1536	19.4211	57.6278	19.4617	1.71716	0.716616
T2G;A71G	0.000820469	8.73e-05	25.7229	2.14701	98.9358	0.699349	73.2129	2.25804	1.50822	0.191639
T2G;A71T	0.00322296	0.000302069	14.1118	1.33686	84.8985	2.32214	70.7867	2.67947	2.25006	0.381844
T2G;A72C	0.0022294	0.000395551	21.5967	2.64991	89.0888	3.39918	67.4921	4.31004	1.70545	0.430883
T2G;A72G	0.000785227	9.45e-05	30.4087	2.4992	96.8975	1.03323	66.4888	2.70436	1.64797	0.280316
T2G;A72T	0.00177514	0.000228206	29.5729	2.21125	96.0578	1.80285	66.485	2.85306	1.56309	0.26985
T3A;C4A	0.00093798	0.00377337	21.3901	6.80582	90.312	43.2257	68.9219	43.7582	0.364779	0.267959
T3A;C4G	0.000285035	0.000576212	32.4117	5.61726	53.8233	5.64756	21.4115	7.96546	4	13.3253
T3A;C4T	0.000444352	0.000158404	9.26886	2.58908	86.5169	6.02022	77.2481	6.55335	0.784926	0.167217
T3A;A5C	0.000137615	0.000133261	52.115	6.5982	83.1532	4.57953	31.0381	8.03171	0.809215	0.507562
T3A;A5G	4.49e-05	1.9e-05	28.4576	5.45206	71.8892	3.235	43.4315	6.33958	1.51711	0.869957
T3A;A5T	0.00105017	0.000564813	18.026	5.05142	60.273	10.4083	42.247	11.5694	4	8.81065
T3A;G6A	2.13e-05	1.7e-05	81.119	3.15987	93.5587	0.906207	12.4397	3.28724	1.01317	0.648261
T3A;G6C	4.52e-05	6.55e-05	84.5403	2.5869	93.5647	1.6332	9.02444	3.05931	0.617876	0.527212
T3A;G6T	1.45e-05	1.28e-05	65.9937	3.97892	97.4939	3.01344	31.5002	4.99126	0.376487	0.164894
T3A;C7A	1.23e-05	0.00106586	70.9501	4.5311	100	121.826	29.0499	121.91	0.0940934	0.582942
T3A;C7G	1.78e-07	3.76e-06	82.4603	4.1041	93.763	2.16601	11.3027	4.64061	0.46494	2.41111
T3A;C7T	5.68e-05	0.000179967	70.8543	7.35824	95.6496	10.8645	24.7954	13.1218	0.348727	0.408252
T3A;C8A	6.01e-05	1.91e-05	43.8715	4.59202	95.5301	1.07514	51.6586	4.7162	0.911949	0.171066
T3A;C8G	0.00017426	0.000145121	79.722	2.41609	93.2813	1.19034	13.5593	2.6934	4	8.72462
T3A;C8T	9.65e-05	5.95e-05	64.7854	4.43968	92.3856	1.81833	27.6003	4.79761	0.865484	0.337619
T3A;G9A	0.00533653	0.00244638	8.50055	1.31951	77.2922	13.4184	68.7916	13.4831	1.26877	0.36566
T3A;G9C	0.0218775	0.045018	10.0458	1.234	59.1675	99.7382	49.1218	99.7458	2.05594	2.38861
T3A;G9T	0.152711	2.64815	4.195	2.01498	100	705.037	95.805	705.04	0.619359	0.742831
T3A;G10A	0.00177196	0.000213603	20.0219	1.12279	84.949	2.66703	64.9271	2.89374	1.44678	0.221909
T3A;G10C	0.0111927	0.0165736	15.9666	2.28264	100	45.2056	84.0334	45.2632	0.793595	0.346283
T3A;G10T	0.0268949	0.0942005	8.68536	1.91421	100	161.502	91.3146	161.513	0.940699	0.677689
T3A;A11C	0.00646778	0.00588667	24.7941	3.50666	73.9343	24.0879	49.1401	24.3418	1.53585	1.33771
T3A;A11G	0.00018377	4.02e-05	28.4991	3.036	83.4013	2.16246	54.9022	3.7274	1.80242	0.473946
T3A;A11T	0.0251692	0.0583727	8.86517	1.36905	100	173.193	91.1348	173.198	1.58419	1.36742
T3A;A12C	0.0141866	0.0118362	11.1149	0.808654	47.6924	22.3605	36.5775	22.3751	1.76976	1.01742
T3A;A12G	0.00109786	0.000215748	19.4139	2.47573	68.8842	4.37932	49.4702	5.03067	2.7811	1.45209
T3A;A12T	0.00379955	80695.3	12.1547	3.2525	9.2362	4.81415	-2.91849	5.80989	6.52e-08	0.762724
T3A;G13A	4.88e-05	2.72e-05	40.5737	6.64518	66.0637	4.38366	25.49	7.96084	3.2155	11.5004
T3A;G13C	0.00526816	0.012554	11.3679	2.77752	100	44.6572	88.6321	44.7435	0.460137	0.181208
T3A;G13T	0.000194036	0.000104177	14.1526	1.92063	56.7684	4.87528	42.6159	5.23996	0.700307	0.190371
T3A;C14A	NA	NA	NA	NA	NA	NA	NA	NA	NA	NA
T3A;C14G	1.25e-07	2.53461	18.9474	5.97107	32.5825	22.438	13.6351	23.2189	7.31e-08	0.26944
T3A;C14T	1.25e-07	6.52391	8.97436	6.27235	19.5286	58.8015	10.5542	59.135	1.99e-07	0.396462
T3A;G15A	1.72e-05	836.404	19.2405	10.1533	4.92643	76784.4	-14.3141	76784.4	0.000220075	1.28137
T3A;G15C	0.0244395	0.0713554	15.5359	2.57936	100	181.163	84.4641	181.182	1.44076	1.54367
T3A;G15T	0.0234709	0.0699962	10.8961	1.43761	51.3607	112.259	40.4646	112.268	1.86449	2.71494
T3A;G16A	1.25e-07	4.89824e+07	4.11765	3.77765	4.8107	4.67132e+07	0.693052	4.67132e+07	1.12e-07	7.09939
T3A;G16C	0.0152311	0.0332081	19.3339	2.02058	40.0621	53.3372	20.7282	53.3754	4	24.7952
T3A;G16T	0.000427923	0.00979788	7.94036	4.89654	11.0663	13.4308	3.12597	14.2955	0.475967	3.58656
T3A;G17A	0.124384	3.00922	10.3034	1.95823	100	1511.76	89.6966	1511.76	0.959398	1.92791
T3A;G17C	0.0128543	0.00404777	48.0745	1.9737	84.2014	16.4485	36.127	16.5665	4	8.29418
T3A;G17T	0.0144989	0.00979727	10.3181	0.986323	31.5146	17.5557	21.1965	17.5834	4	9.39142
T3A;A18C	0.0364194	0.382967	22.6199	1.29022	100	1248.6	77.3801	1248.6	2.41579	7.50505
T3A;A18G	0.0436832	3.13535	30.4429	1.50475	100	10936.9	69.5571	10936.9	2.91842	38.5729
T3A;A18T	0.000216388	0.000536499	19.9389	3.63194	27.5242	3.6037	7.58529	5.11641	1.02617	2.06677
T3A;C19A	0.0388814	0.205455	40.6982	1.98347	100	158.619	59.3018	158.632	0.893711	0.872588
T3A;C19G	0.000128863	0.000150252	17.3774	3.42578	10.5973	2.02429	-6.78011	3.97916	4	46.2737
T3A;C19T	0.000122777	0.000148733	3.73256	3.30678	9.55563	2.64785	5.82307	4.23626	4	30.738
T3A;G20A	2.88e-06	31.9236	50.6331	6.62108	60.3781	11.6454	9.74498	13.3961	2.57e-08	0.272687
T3A;G20C	0.0160178	0.0523515	18.8876	2.3808	39.656	81.3136	20.7684	81.3485	4	31.0592
T3A;G20T	0.0366786	1.67004	65.0775	1.69746	100	2645.1	34.9225	2645.1	2.56672	33.7596
T3A;A21C	0.0069882	0.0390111	16.4964	1.9821	24.3546	19.634	7.85821	19.7338	1.12716	3.53293
T3A;A21G	0.000304595	0.000150338	36.0634	5.31523	88.8558	4.12444	52.7924	6.72775	0.984464	0.373015
T3A;A21T	0.00822783	0.00650845	22.1716	1.64541	75.0408	19.5417	52.8692	19.6109	1.14962	0.500207
T3A;C22A	0.0379526	0.315726	21.0534	3.30713	100	374.095	78.9466	374.109	0.991356	1.56181
T3A;C22G	3.26e-06	224.532	5.20829	5.02991	10.1031	279.336	4.89479	279.381	1.64e-06	0.534763
T3A;C22T	2.5	452.58	4.21046	3.39011	32.371	494.349	28.1606	494.36	0.160505	0.807694
T3A;C23A	0.017918	0.0809524	7.26902	1.74872	27.7208	120.672	20.4517	120.684	4	30.1491
T3A;C23G	0.00289121	0.00262427	50.6079	6.53576	24.1603	8.8568	-26.4476	11.0072	4	10.5533
T3A;C23T	0.0563724	0.530807	5.75755	1.53314	100	711.316	94.2424	711.317	1.22618	1.73906
T3A;C24A	1.25e-07	2.50337	17.5	6.80503	38.3335	23.5643	20.8335	24.5273	4.64e-08	0.212432
T3A;C24G	NA	NA	NA	NA	NA	NA	NA	NA	NA	NA
T3A;C24T	0.0106178	0.132925	68.4252	7.71759	100	105.07	31.5748	105.353	0.555151	1.52107
T3A;G25A	0.017571	0.0688302	5.55741	1.12249	18.7501	66.0701	13.1927	66.0796	4	27.5695
T3A;G25C	0.00618057	0.003232	18.336	1.65292	39.6253	6.34802	21.2894	6.55969	4	7.40504
T3A;G25T	0.0126983	0.00488474	17.443	2.2861	55.6105	19.515	38.1674	19.6485	4	8.13151
T3A;T26A	0.000744113	7.56e-05	55.231	1.33862	95.3606	0.633815	40.1296	1.48108	1.71546	0.261675
T3A;T26C	0.000526348	8.25e-05	40.4809	2.83634	96.8548	0.97243	56.3739	2.99841	1.99397	0.487836
T3A;T26G	0.00116229	0.000125564	65.3288	1.13655	95.0943	0.651947	29.7655	1.31026	1.94575	0.375844
T3A;T27A	0.000965259	0.00011882	41.2561	2.42209	96.8397	0.87966	55.5836	2.57688	1.84934	0.366693
T3A;T27C	0.000213519	2.33e-05	66.5891	0.980206	98.7515	0.188715	32.1624	0.998207	1.119	0.0810825
T3A;T27G	0.00199028	0.000212716	24.7601	1.46962	86.9335	1.77622	62.1734	2.30537	1.66649	0.244274
T3A;T28A	0.00104889	0.000119437	43.067	2.10878	96.8304	0.852242	53.7634	2.27448	1.79513	0.316345
T3A;T28C	0.00114096	0.000169233	38.8649	2.77888	96.2881	1.44425	57.4232	3.13178	1.76691	0.442304
T3A;T28G	0.00204394	0.000473973	67.3246	1.22197	94.2761	2.03139	26.9515	2.3706	1.11208	0.278124
T3A;T29A	0.00138678	0.000166727	33.1494	2.14695	95.9703	1.55296	62.8209	2.64974	1.56634	0.26892
T3A;T29C	2.13e-05	2.18e-05	75.9033	4.07374	98.3423	1.98009	22.439	4.52947	0.500004	0.259806
T3A;T29G	0.00300393	0.000171283	26.1352	0.764452	87.2958	1.15314	61.1606	1.38351	1.71884	0.142248
T3A;C30A	0.00387785	0.000895965	15.2191	1.25661	81.1334	6.1811	65.9143	6.30754	1.44816	0.314671
T3A;C30G	0.00833498	0.00922458	7.42496	1.46629	82.1956	29.1086	74.7707	29.1455	0.797181	0.262152
T3A;C30T	0.00107032	0.000112485	22.7182	2.27	90.569	1.94255	67.8508	2.98771	2.64685	0.669169
T3A;C31A	0.0038174	0.0022326	8.82562	2.35102	62.6271	15.3368	53.8015	15.516	2.05279	1.4185
T3A;C31G	0.00242841	0.000705829	13.0129	1.91376	93.5507	7.56911	80.5377	7.8073	1.08079	0.257431
T3A;C31T	0.00314318	0.000537592	8.28985	0.661997	91.6375	4.59825	83.3477	4.64566	0.948988	0.0909263
T3A;C32A	0.000447751	5.92e-05	27.5216	2.23116	92.0322	1.27799	64.5106	2.57125	2.05731	0.469869
T3A;C32G	0.00017558	7.42e-05	26.0548	3.47988	70.0135	3.70291	43.9587	5.08145	1.61165	0.751947
T3A;C32T	0.000713347	8.95e-05	22.2515	1.81258	93.5318	1.8544	71.2803	2.59312	1.07206	0.141895
T3A;T33A	0.000450032	3.29e-05	55.1366	1.04867	97.4277	0.272926	42.2911	1.08361	1.93238	0.198329
T3A;T33C	0.000144162	0.000124126	52.5892	7.33598	95.6052	4.56068	43.0159	8.63807	0.647802	0.301854
T3A;T33G	0.00157178	0.000623825	80.0993	1.25806	95.191	1.88278	15.0917	2.26442	1.1076	0.481175
T3A;C34A	0.000490265	9.21e-05	50.5007	3.26317	97.6475	0.741519	47.1468	3.34636	2.17512	0.603953
T3A;C34G	0.00288006	0.00769318	44.61	4.37713	100	27.3703	55.39	27.7181	0.399907	0.218035
T3A;C34T	0.000573	9.31e-05	42.4958	2.76949	94.663	1.32617	52.1672	3.07064	2.12579	0.584174
T3A;T35A	0.000563538	0.000104877	37.6543	3.09958	92.7777	1.8832	55.1234	3.62682	2.0545	0.663533
T3A;T35C	0.000348253	0.000137482	57.158	3.85288	94.468	1.72475	37.3099	4.22131	1.19306	0.431339
T3A;T35G	0.000327406	0.000159813	56.9541	5.00681	98.908	2.41114	41.9539	5.55713	0.814768	0.274986
T3A;T36A	0.000894974	0.000333319	17.4792	3.15133	92.4595	6.66977	74.9802	7.37677	0.812704	0.209652
T3A;T36C	0.0569929	0.334071	2.74879	1.30156	100	132.203	97.2512	132.21	0.393872	0.158848
T3A;T36G	0.000253724	7.66e-05	55.1379	2.2787	90.2306	1.18695	35.0927	2.56931	3.01744	1.29145
T3A;T37A	0.000851463	0.00012538	19.1175	2.0794	83.7944	3.04447	64.6769	3.68682	2.22622	0.617852
T3A;T37C	0.000820286	0.00117732	62.3406	4.26398	100	10.4909	37.6594	11.3243	0.445273	0.222201
T3A;T37G	0.000166887	6.19e-05	26.6097	4.32604	88.051	3.13812	61.4413	5.34438	0.904612	0.232227
T3A;C38A	0.0012536	0.000174897	18.165	1.4516	89.1655	2.82495	71.0005	3.17608	1.49014	0.265326
T3A;C38G	0.000838257	0.000374231	14.4618	3.03652	80.8956	7.81706	66.4339	8.38611	0.867602	0.262097
T3A;C38T	0.001059	0.000192584	19.1915	2.83214	80.1589	4.33555	60.9674	5.17861	3.31155	1.65482
T3A;A39C	0.000503939	0.000131382	25.301	2.31263	84.8594	3.48426	59.5584	4.1819	0.787558	0.145734
T3A;A39G	0.000684412	8.71e-05	35.8006	1.78611	92.6568	1.46475	56.8562	2.30991	1.52745	0.280729
T3A;A39T	0.000623497	0.000123543	32.8362	2.88553	87.3929	2.63834	54.5567	3.90987	1.76276	0.602451
T3A;T40A	0.000743138	0.00012127	17.3308	1.80005	80.0587	2.98267	62.7279	3.48375	1.50384	0.348853
T3A;T40C	0.000705985	0.000116854	20.7812	2.33261	79.3643	3.45802	58.5831	4.17121	2.91236	1.03616
T3A;T40G	0.00110459	0.000173297	20.1008	2.05936	82.5838	3.4882	62.483	4.05074	1.90263	0.562604
T3A;T41A	0.000608165	0.000109286	27.6202	2.4905	84.8552	2.71733	57.235	3.68599	2.3201	0.869757
T3A;T41C	0.000673894	0.000126897	28.3189	2.54723	89.4784	2.62202	61.1595	3.6556	1.44105	0.389006
T3A;T41G	0.00225881	0.000690106	15.3543	2.86947	84.1536	6.6711	68.7992	7.26205	1.70013	0.649965
T3A;G42A	0.00119746	0.000199299	20.9728	1.45732	85.0404	3.29103	64.0676	3.59926	1.14114	0.208103
T3A;G42C	0.000822262	0.000196204	26.626	2.83622	86.0587	3.88777	59.4327	4.81237	1.29865	0.416643
T3A;G42T	0.000887654	0.000271517	22.5804	3.41328	86.14	5.01132	63.5596	6.06332	1.4696	0.60905
T3A;C43A	0.00139285	0.00020399	16.8646	1.82049	85.4674	3.11515	68.6028	3.6081	1.69169	0.397897
T3A;C43G	0.00551253	0.00169373	12.9333	1.36907	75.1094	8.99414	62.1761	9.09775	1.48189	0.410486
T3A;C43T	0.00081678	0.000226645	19.3605	2.87979	78.3246	4.90188	58.9641	5.68521	1.637	0.71793
T3A;G44A	0.0330571	0.127975	7.41488	1.51908	100	201.525	92.5851	201.531	0.9853	0.681431
T3A;G44C	0.000619034	0.000305846	21.8655	4.2996	96.8662	7.64368	75.0008	8.76997	0.613961	0.162059
T3A;G44T	0.00130605	0.000434053	7.83536	1.71138	85.6366	6.81454	77.8012	7.02615	0.874429	0.173342
T3A;C45A	0.00860305	0.00504005	11.7056	1.12457	51.8921	14.0277	40.1865	14.0727	1.6584	0.848392
T3A;C45G	0.0180404	0.0278183	6.87702	1.2963	100	77.8912	93.123	77.902	1.13239	0.520965
T3A;C45T	0.00176378	0.00068957	15.5163	2.23726	68.8285	7.49761	53.3122	7.82429	1.51815	0.74115
T3A;G46A	3.7e-05	8.95e-06	30.3665	3.72304	77.6099	1.924	47.2434	4.1908	1.58416	0.508735
T3A;G46C	0.00169942	0.000204824	34.6261	1.51569	91.2017	1.94428	56.5756	2.46526	1.62599	0.288854
T3A;G46T	0.00298932	0.122575	67.7659	5.20915	100	102.11	32.2341	102.243	0.157919	0.421832
T3A;G47A	8.13e-06	9.63e-05	73.0608	3.98278	86.7476	19.8347	13.6868	20.2306	0.206891	0.749004
T3A;G47C	0.00880358	0.0716596	65.1482	3.62043	100	42.6056	34.8518	42.7592	0.2985	0.264259
T3A;G47T	0.00575578	0.101742	59.1533	6.33986	100	79.855	40.8467	80.1063	0.224297	0.338018
T3A;G48A	0.0384723	0.381297	28.4999	4.86178	100	204.548	71.5001	204.605	0.519926	0.642042
T3A;G48C	0.022715	0.78504	65.7091	1.36807	84.14	1119.41	18.431	1119.41	4	120.723
T3A;G48T	3.3e-06	67.5299	43.3476	12.6887	80.3933	86.8921	37.0457	87.8137	2.18e-07	0.151428
T3A;G49A	0.0233134	0.0305407	22.6023	1.11848	100	61.0373	77.3977	61.0476	1.18135	0.478925
T3A;G49C	0.0452501	0.316603	12.4376	1.8352	100	463.534	87.5624	463.538	1.2255	1.5744
T3A;G49T	0.045579	33.8949	10.9515	1.50068	100	227519	89.0485	227519	4	313.967
T3A;A50C	0.0109287	0.00215786	16.4179	1.07495	46.4095	6.1689	29.9916	6.26186	4	2.87433
T3A;A50G	0.0149294	0.026098	19.5735	2.28964	100	67.3068	80.4265	67.3457	1.02968	0.602503
T3A;A50T	6.83e-05	8.79e-05	23.7197	2.54298	16.6621	1.59897	-7.05764	3.0039	1.07155	1.41615
T3A;C51A	0.0188524	0.0402269	27.671	3.28927	100	134.772	72.329	134.812	1.95421	2.79641
T3A;C51G	NA	NA	NA	NA	NA	NA	NA	NA	NA	NA
T3A;C51T	0.0101106	0.0223987	24.0696	3.15147	81.4839	56.2926	57.4143	56.3808	1.03401	0.930895
T3A;G52A	0.0230366	0.115002	26.1856	3.25437	100	134.595	73.8144	134.635	0.700409	0.638266
T3A;G52C	0.012122	0.0435646	21.427	4.49092	100	100.943	78.573	101.042	0.761843	0.736272
T3A;G52T	0.00488612	0.0016367	28.1073	1.76734	45.2081	4.62719	17.1008	4.95322	4	10.0678
T3A;A53C	0.0300407	0.133783	14.407	2.3313	100	185.421	85.593	185.436	0.891289	0.778385
T3A;A53G	0.00165171	0.000320992	19.1105	1.91184	88.2661	4.12816	69.1556	4.54938	1.27996	0.284194
T3A;A53T	1.25e-07	1.60052	24.4444	3.84179	18.0012	28.9701	-6.44325	29.2238	7.37e-07	0.351469
T3A;C54A	1.05e-06	6.61226	58.2373	8.05432	81.9652	581.664	23.7279	581.719	7.87e-06	0.173753
T3A;C54G	2.5	179.946	26.0304	4.24691	100	525.171	73.9696	525.189	0.164429	0.345456
T3A;C54T	0.000216036	0.000619923	22.1845	1.92114	17.942	1.54906	-4.24244	2.46787	4	18.6254
T3A;C55A	0.00618106	0.0159055	24.271	2.9507	77.7458	33.5324	53.4747	33.662	0.511014	0.274763
T3A;C55G	9.36e-06	0.000220003	24.9995	11.069	47.2595	4.43981	22.26	11.9262	4	325.471
T3A;C55T	0.000198812	8.95e-05	33.7275	5.02419	85.5793	3.35866	51.8518	6.04343	1.02006	0.344649
T3A;C56A	0.00565414	0.003644	23.5209	2.4754	79.0942	16.1248	55.5733	16.3137	1.32467	0.688213
T3A;C56G	0.0229931	0.0731707	3.74148	1.61636	100	206.199	96.2585	206.205	1.31956	1.24481
T3A;C56T	0.00272606	0.00168153	20.391	3.04548	95.3604	14.3881	74.9695	14.7069	0.83048	0.298339
T3A;T57A	0.00104892	0.000378751	8.05207	2.11486	66.9208	6.58149	58.8687	6.91293	1.02805	0.315968
T3A;T57C	0.0044661	0.00501888	17.5892	2.60919	100	29.3755	82.4108	29.4912	0.874387	0.398222
T3A;T57G	0.0199761	0.0824365	13.5659	2.42118	84.3844	96.7954	70.8185	96.8257	0.635665	0.421169
T3A;G58A	0.000900564	0.000295133	26.0117	3.41109	90.3167	5.23267	64.305	6.24631	1.00506	0.33428
T3A;G58C	0.000416724	0.00037596	39.2524	9.14554	88.0313	7.34181	48.7789	11.7279	1.01461	0.803485
T3A;G58T	0.000362813	0.000129737	62.6005	2.63187	91.6529	1.54523	29.0524	3.05197	1.20952	0.443867
T3A;C59A	0.000177683	4.56e-05	44.4988	2.953	94.8705	1.45915	50.3717	3.29383	0.840433	0.143153
T3A;C59G	0.000962169	0.000192075	8.1912	1.32182	76.6907	4.08037	68.4995	4.28913	1.13357	0.212181
T3A;C59T	8.47e-05	2.21e-05	41.0679	2.86846	89.576	1.55254	48.5081	3.26166	0.831953	0.143929
T3A;A60C	0.000841256	0.000228136	23.2578	3.17536	89.6472	4.38306	66.3893	5.4124	1.11525	0.33143
T3A;A60G	0.000481703	0.000117696	15.6705	2.37698	82.9284	3.73097	67.2578	4.42382	0.974608	0.191312
T3A;A60T	0.00307439	0.000452251	17.2789	1.2766	84.8888	3.7439	67.6099	3.95557	1.49037	0.242204
T3A;G61A	0.000599703	0.000392976	13.8875	5.83673	92.3734	10.8579	78.4859	12.3273	0.676333	0.25205
T3A;G61C	0.000200139	7.19e-05	29.3725	3.82137	94.7313	3.50275	65.3589	5.18384	0.649785	0.130904
T3A;G61T	0.000405326	0.000128432	26.3622	3.57219	86.599	3.82806	60.2368	5.2359	0.987107	0.277748
T3A;A62C	0.000117859	3.36e-05	63.1748	2.75942	97.9528	0.632553	34.778	2.83099	1.02065	0.182278
T3A;A62G	0.00194665	0.00677598	47.0736	5.53885	100	31.9013	52.9264	32.3786	0.381379	0.263739
T3A;A62T	0.000713002	0.000150368	63.9639	2.44987	94.8008	1.13592	30.8369	2.70041	2.30764	0.86752
T3A;G63A	0.00119004	0.000146392	18.6767	1.97343	94.2289	2.22299	75.5522	2.97255	1.46073	0.256882
T3A;G63C	0.00086593	6.79e-05	27.6303	1.74556	96.1122	0.694474	68.4819	1.87863	2.02102	0.255915
T3A;G63T	9.78e-05	1.31e-05	24.86	2.65631	98.364	0.458731	73.5041	2.69563	1.02906	0.08456
T3A;A64C	0.000802322	7.82e-05	23.7481	1.78639	98.3736	1.03238	74.6255	2.06325	1.20097	0.132922
T3A;A64G	0.000481198	0.000140798	52.4133	3.69743	94.8284	1.85767	42.4151	4.13786	1.91871	0.899325
T3A;A64T	0.000475504	5.58e-05	36.592	2.1556	96.8908	0.652025	60.2988	2.25205	1.93052	0.312043
T3A;G65A	1.4e-05	5.33e-06	75.0936	2.30076	98.2289	0.371977	23.1353	2.33064	0.75295	0.154795
T3A;G65C	5.62e-05	1.15e-05	36.3934	4.45289	95.497	0.781446	59.1036	4.52093	1.40203	0.285338
T3A;G65T	1.01e-05	4.47e-06	61.8171	4.2865	97.8095	0.511404	35.9924	4.3169	0.962049	0.27621
T3A;G66A	1.32e-05	5.49e-06	55.3092	5.32331	91.6799	1.25453	36.3707	5.46914	1.33211	0.590001
T3A;G66C	3.18e-05	6.54e-06	30.7436	5.05738	98.1235	0.527059	67.38	5.08477	1.38941	0.235993
T3A;G66T	9.4e-05	3.94e-05	80.5851	2.29818	97.437	0.645555	16.8518	2.38713	1.22819	0.397218
T3A;C67A	4.94e-05	1.94e-05	32.7654	4.20488	78.6377	2.49473	45.8723	4.88924	0.909049	0.273838
T3A;C67G	0.000728633	0.000175523	7.6357	1.5129	62.4959	4.65757	54.8602	4.89712	1.87485	0.729558
T3A;C67T	0.000202105	8.78e-05	22.6201	3.16988	71.4831	4.03338	48.863	5.12994	1.36455	0.555428
T3A;T68A	3.52e-05	2.17e-05	41.623	12.335	90.7618	3.30698	49.1388	12.7706	2.2625	2.52892
T3A;T68C	0.000289786	0.000505467	28.2896	8.21388	97.1397	19.0343	68.8501	20.731	0.421191	0.236893
T3A;T68G	0.0097095	0.0619263	4.24024	4.42683	100	148.378	95.7598	148.444	0.498036	0.423194
T3A;G69A	0.000167004	0.000160907	84.2619	2.91634	98.2294	1.70482	13.9675	3.37809	0.650546	0.354792
T3A;G69C	1.25e-07	0.307461	91.3069	4.64993	100	9.52682	8.69308	10.601	2.91e-07	0.188398
T3A;G69T	3.31e-05	1.42e-05	89.6367	1.22304	96.9711	0.296158	7.33445	1.25839	1.43006	0.671129
T3A;A70C	8.82e-05	2.49e-05	71.651	2.30962	98.5654	0.372996	26.9144	2.33954	0.977053	0.15554
T3A;A70G	0.000961218	0.000200624	23.3442	3.12757	94.1621	3.45946	70.8179	4.66364	1.3195	0.388815
T3A;A70T	0.00404244	0.000899607	15.2464	1.6716	97.0371	6.90646	81.7907	7.10587	1.10489	0.199375
T3A;A71C	0.000365544	6.48e-05	71.6759	1.44984	98.1588	0.36751	26.4829	1.4957	1.7824	0.362914
T3A;A71G	0.000105318	3.41e-05	48.6648	4.14866	96.6362	1.12637	47.9714	4.29885	0.991417	0.203334
T3A;A71T	4.99e-05	1.36e-05	50.7772	4.26341	97.2662	0.650398	46.489	4.31273	1.07885	0.196936
T3A;A72C	0.000648295	7.53e-05	46.5587	1.9982	98.0611	0.579222	51.5024	2.08046	1.54432	0.219193
T3A;A72G	0.000350607	7.03e-05	38.5627	2.81223	96.0305	1.10924	57.4678	3.02309	1.50859	0.312334
T3A;A72T	0.000483831	4.94e-05	67.3949	1.31886	98.253	0.317929	30.8581	1.35664	2.50357	0.459805
T3C;C4A	NA	NA	NA	NA	NA	NA	NA	NA	NA	NA
T3C;C4G	0.000211701	0.000232535	34.955	8.10376	75.5687	7.60905	40.6137	11.1161	0.787739	0.56814
T3C;C4T	0.00061385	0.000124546	40.0148	2.27009	74.8894	2.5561	34.8747	3.41861	3.33903	2.04379
T3C;A5C	2.5	386.759	28.5761	9.47827	100	1097.24	71.4239	1097.28	0.165495	0.752351
T3C;A5G	0.000840903	0.000301623	37.9488	4.00999	84.9274	4.5536	46.9786	6.06757	1.51759	0.853207
T3C;A5T	0.000531261	0.000670633	8.58385	5.20716	57.5683	15.8118	48.9844	16.6472	0.773394	0.542559
T3C;G6A	5.79e-05	3.33e-05	87.8283	1.74868	93.4223	0.798438	5.594	1.92233	2.92186	5.78212
T3C;G6C	1.24e-05	1.05e-05	70.2797	4.7089	91.5249	1.44237	21.2452	4.92485	0.890411	0.592798
T3C;G6T	0.000101323	0.000419516	80.5855	5.71718	97.1265	9.81172	16.541	11.3559	0.346915	0.473001
T3C;C7A	NA	NA	NA	NA	NA	NA	NA	NA	NA	NA
T3C;C7G	9.4e-05	9.83e-05	74.232	3.78219	96.3037	3.10445	22.0718	4.89312	0.487258	0.23727
T3C;C7T	3.98e-05	1.54e-05	70.8583	2.17517	92.3576	0.811526	21.4992	2.32162	0.78728	0.194282
T3C;C8A	0.000526849	0.000214169	50.433	4.83455	95.2064	2.59282	44.7734	5.48594	1.362	0.649683
T3C;C8G	5.52e-05	4.56e-05	69.7145	5.27955	96.3128	1.77018	26.5983	5.56841	0.697382	0.296398
T3C;C8T	0.00120729	0.000290126	53.81	2.41386	90.8133	2.32294	37.0032	3.35004	1.67969	0.617133
T3C;G9A	0.00751166	0.00239797	10.6673	0.82206	76.9123	10.2709	66.245	10.3038	1.38995	0.288494
T3C;G9C	0.0124825	0.0035524	11.4321	0.777366	39.9962	8.39243	28.564	8.42836	3.03857	1.7743
T3C;G9T	2.5	926.179	3.61471	3.58574	42.2409	974.749	38.6262	974.756	0.119566	1.14144
T3C;G10A	0.00687991	0.0233029	26.3481	6.24021	100	71.623	73.6519	71.8943	0.628111	0.589487
T3C;G10C	0.0342456	0.414199	52.2581	1.85804	100	723.793	47.7419	723.795	2.10828	8.37444
T3C;G10T	0.00266202	0.00105359	15.1584	1.96117	40.736	4.64576	25.5775	5.04275	4	3.97
T3C;A11C	NA	NA	NA	NA	NA	NA	NA	NA	NA	NA
T3C;A11G	0.000146527	6.83e-05	30.2703	5.41847	82.4749	3.71474	52.2046	6.56956	1.05616	0.382565
T3C;A11T	0.00394793	0.00766007	8.90882	1.8023	36.7448	18.3198	27.836	18.4083	0.790881	0.606128
T3C;A12C	0.0102215	0.007053	12.8723	1.86956	67.2061	24.8629	54.3337	24.9331	1.82031	1.18309
T3C;A12G	0.00101504	0.000373653	16.496	3.13784	73.8938	6.94513	57.3978	7.62108	1.30357	0.573788
T3C;A12T	0.0223165	1.09335	6.55174	2.10495	23.5057	1386.94	16.9539	1386.94	3.86113	170.501
T3C;G13A	0.000453903	0.000599806	24.9281	4.21931	93.9289	15.1495	69.0007	15.7261	0.424139	0.153806
T3C;G13C	0.0408235	0.258803	11.7981	2.25106	100	239.175	88.2019	239.185	0.74159	0.647362
T3C;G13T	0.000302268	0.000119392	19.2202	2.78311	64.6357	3.885	45.4155	4.779	3.25394	2.12942
T3C;C14A	NA	NA	NA	NA	NA	NA	NA	NA	NA	NA
T3C;C14G	NA	NA	NA	NA	NA	NA	NA	NA	NA	NA
T3C;C14T	NA	NA	NA	NA	NA	NA	NA	NA	NA	NA
T3C;G15A	0.176642	6.03169e+06	13.872	2.22421	100	11746891910	86.128	11746891910	4	72655.7
T3C;G15C	0.00720457	0.00292582	22.381	1.7483	60.0549	10.0933	37.6739	10.2435	2.25035	1.44651
T3C;G15T	0.000347693	0.00132336	50.5272	2.81529	57.4178	2.32617	6.89054	3.65197	4	40.4392
T3C;G16A	NA	NA	NA	NA	NA	NA	NA	NA	NA	NA
T3C;G16C	2.5	259.683	20.3915	3.9604	57.4247	628.186	37.0333	628.198	0.246527	0.822398
T3C;G16T	0.0361092	0.475498	9.1655	1.27912	100	2198.08	90.8345	2198.08	2.78892	10.627
T3C;G17A	0.0160428	0.0211676	18.0631	1.82417	50.4648	48.0266	32.4017	48.0612	3.07903	6.80543
T3C;G17C	0.0197457	0.0533563	39.5879	2.7339	100	90.194	60.4121	90.2354	1.12719	1.06048
T3C;G17T	0.0402644	0.385875	14.2861	2.71811	100	794.822	85.7139	794.826	1.579	3.5287
T3C;A18C	0.108369	2.87896	17.4966	3.56561	100	1227.79	82.5034	1227.79	0.822145	2.0454
T3C;A18G	2.5	310.61	22.0307	3.37107	54.4392	821.386	32.4085	821.393	0.29274	1.15001
T3C;A18T	0.00385833	0.00358821	15.9628	1.39863	22.9944	3.38488	7.03162	3.66245	2.40603	4.49589
T3C;C19A	1.25e-07	1.78486	21.0526	3.25755	51.7992	16.5468	30.7466	16.8644	7.64e-08	0.0664049
T3C;C19G	2.08e-05	872.687	19.4806	10.7461	18.157	45.7741	-1.32359	47.0186	1.54e-06	3.98154
T3C;C19T	1.25e-07	5.69e-06	9.54573	4.76893	15.9516	43.7229	6.40591	43.9822	0.177948	5.24213
T3C;G20A	0.0285303	0.679592	37.5727	3.22218	100	2463.67	62.4273	2463.67	2.95986	33.4525
T3C;G20C	1.47e-06	35.6417	13.1142	5.78357	20.2656	1743.4	7.15143	1743.41	2e-05	0.515505
T3C;G20T	2.5	457.97	47.6091	9.31863	96.6167	908.751	49.0075	908.799	0.1676	0.904256
T3C;A21C	0.0333937	2.67673	12.6391	1.36844	100	19489	87.3609	19489	4	95.0218
T3C;A21G	0.00314723	0.00358925	35.2732	4.9264	100	22.3643	64.7268	22.9005	0.739876	0.427087
T3C;A21T	2.74e-07	8.50231	15.6863	8.48998	38.6821	30.334	22.9958	31.4997	2.9e-08	0.275925
T3C;C22A	NA	NA	NA	NA	NA	NA	NA	NA	NA	NA
T3C;C22G	NA	NA	NA	NA	NA	NA	NA	NA	NA	NA
T3C;C22T	0.0174917	1.16942	22.0493	5.69181	0	130.785	-22.0493	130.909	0.173581	0.65542
T3C;C23A	NA	NA	NA	NA	NA	NA	NA	NA	NA	NA
T3C;C23G	0.0324517	11.3884	49.977	3.79781	100	47554.1	50.023	47554.1	4	453.936
T3C;C23T	2.5	2115.6	13.4438	4.55296	31.7245	763.808	18.2807	763.821	0.0907911	1.80502
T3C;C24A	NA	NA	NA	NA	NA	NA	NA	NA	NA	NA
T3C;C24G	0.0206242	0.0212976	29.07	1.18926	100	71.63	70.93	71.6399	2.13842	1.52403
T3C;C24T	1.94e-06	43.497	26.6667	12.1021	69.2825	86.8555	42.6159	87.6945	1.52e-07	0.158425
T3C;G25A	NA	NA	NA	NA	NA	NA	NA	NA	NA	NA
T3C;G25C	0.0284018	0.0880186	22.7089	1.54315	100	262.623	77.2911	262.627	2.03228	2.60918
T3C;G25T	9.08e-06	271.78	26.1261	9.46189	33.9652	16.1294	7.83909	18.6998	3.31e-08	0.682202
T3C;T26A	0.00202563	0.000582016	36.1138	3.51833	88.036	4.27487	51.9221	5.53653	1.96629	0.87436
T3C;T26C	0.000585348	7.43e-05	34.3262	2.07309	95.2835	1.1021	60.9573	2.34784	1.50724	0.260011
T3C;T26G	0.00296473	0.000608118	41.2004	2.4879	87.829	3.03944	46.6285	3.92783	2.6921	1.1314
T3C;T27A	0.00196568	0.00023761	34.7607	1.95853	94.1082	1.6365	59.3474	2.55225	1.83657	0.332424
T3C;T27C	0.000595688	6.53e-05	30.205	2.21877	90.4011	1.35607	60.1961	2.60036	2.58061	0.643111
T3C;T27G	0.00562592	0.00113036	16.0422	1.29195	64.4499	5.60713	48.4077	5.75404	2.17719	0.804605
T3C;T28A	0.00162046	0.000235302	32.2638	2.30607	93.1572	2.06624	60.8935	3.09634	1.6569	0.359585
T3C;T28C	0.00417923	0.00336598	22.3504	3.57384	100	20.9243	77.6496	21.2273	0.888866	0.385142
T3C;T28G	0.0201722	0.159392	29.5397	6.07707	100	123.98	70.4603	124.129	0.424055	0.43495
T3C;T29A	0.00204235	0.000606142	28.834	2.89887	97.1808	6.19696	68.3468	6.84148	0.998095	0.26989
T3C;T29C	0.000639038	9.83e-05	70.4177	1.0606	95.8767	0.681656	25.459	1.26076	1.18837	0.20977
T3C;T29G	0.00430957	0.00112376	16.708	1.32887	81.6659	6.85043	64.9579	6.97813	1.18794	0.243084
T3C;C30A	0.00317838	0.000557959	17.415	1.66682	82.1141	4.14637	64.699	4.46885	2.05128	0.532697
T3C;C30G	0.00407374	0.00147944	16.3441	1.72502	75.2897	8.73786	58.9457	8.90651	1.34491	0.415873
T3C;C30T	0.00151629	0.000380636	20.265	2.95957	93.0562	5.02206	72.7912	5.82924	1.18639	0.331158
T3C;C31A	0.00877242	0.00909222	11.4391	1.73642	81.5604	34.9552	70.1213	34.9983	1.32983	0.706868
T3C;C31G	0.00150969	0.00017125	27.1782	1.27651	85.4745	2.11681	58.2963	2.47192	1.41027	0.221842
T3C;C31T	0.00188901	0.000346476	12.5909	1.49123	80.9169	4.22754	68.3261	4.48284	1.56575	0.351283
T3C;C32A	0.000691373	0.000112898	22.8978	2.42884	88.4301	2.49529	65.5323	3.4822	1.82326	0.503838
T3C;C32G	0.000108323	0.000104567	43.497	5.96092	92.0361	7.00212	48.5391	9.19577	0.493815	0.215442
T3C;C32T	0.00106159	5.79e-05	25.2575	1.06669	92.8377	0.846952	67.5801	1.36204	2.51079	0.300684
T3C;T33A	0.00129353	0.000226995	40.0672	2.99319	95.9524	1.70528	55.8852	3.44488	2.0041	0.581581
T3C;T33C	0.00112091	0.00059958	53.3533	4.70781	91.8361	5.71651	38.4828	7.40554	1.11889	0.72478
T3C;T33G	0.556717	44.8288	40.9713	9.48496	100	621.818	59.0287	621.89	0.218672	0.711475
T3C;C34A	0.000507327	2.79e-05	36.8712	0.856126	94.7832	0.431649	57.912	0.958787	1.42276	0.0977915
T3C;C34G	0.000662546	0.000152652	60.7333	2.51458	96.1338	1.28134	35.4004	2.82223	1.38229	0.419947
T3C;C34T	0.000793254	0.000209766	34.5654	4.11238	95.5594	2.59704	60.994	4.86377	1.56134	0.564581
T3C;T35A	0.000824069	0.000175256	45.6924	3.04887	93.1965	2.12988	47.5041	3.71914	1.82552	0.694338
T3C;T35C	0.000318283	0.000150556	35.8474	5.3241	100	4.49609	64.1526	6.96856	0.588873	0.153435
T3C;T35G	0.000280952	0.000322506	74.1221	3.05549	99.2311	4.78876	25.109	5.68051	0.432439	0.188788
T3C;T36A	0.00109195	0.000193063	30.6681	2.99054	84.3636	3.33504	53.6955	4.47949	2.63592	1.14096
T3C;T36C	0.00305155	0.00274826	9.64939	2.23074	46.4829	13.4208	36.8336	13.6049	1.21225	0.879108
T3C;T36G	0.000170126	7.43e-05	54.2434	3.70971	94.8199	2.28515	40.5765	4.35705	0.639867	0.153594
T3C;T37A	0.00101477	9.38e-05	22.5199	1.1737	84.8675	1.7087	62.3476	2.07298	1.7308	0.260212
T3C;T37C	0.0032685	0.000614028	42.4675	1.99746	82.5893	2.90998	40.1218	3.52957	2.46928	0.922909
T3C;T37G	0.000298287	0.000119388	37.1216	4.24034	88.2294	3.35533	51.1078	5.40729	0.904232	0.282383
T3C;C38A	0.00283279	0.01009	17.7059	6.27798	100	57.7413	82.2941	58.0816	0.444576	0.30642
T3C;C38G	0.00156484	0.00103208	19.5386	4.03616	100	13.8999	80.4614	14.4741	0.722001	0.26189
T3C;C38T	0.00235283	0.000523922	19.4929	2.07463	81.9066	4.83243	62.4137	5.25894	1.8013	0.552788
T3C;A39C	0.00183382	0.000739839	31.7735	4.63937	93.6372	6.81107	61.8637	8.24102	1.52629	0.817481
T3C;A39G	0.00161621	0.000686773	55.3303	3.922	88.6106	4.65596	33.2803	6.0877	1.94168	1.46492
T3C;A39T	0.00110402	0.000176107	35.4543	3.1823	88.1763	2.59807	52.722	4.10816	3.30207	1.90408
T3C;T40A	0.00113812	0.00015027	24.9546	2.291	78.015	3.1959	53.0604	3.93224	3.61615	2.19147
T3C;T40C	0.0010332	0.000172164	32.1371	2.71427	90.2582	2.53415	58.1212	3.71338	2.07974	0.659096
T3C;T40G	0.00259293	0.00149442	27.2183	4.02364	87.3793	11.734	60.1609	12.4047	1.21418	0.668115
T3C;T41A	0.00143508	0.000381797	35.7775	3.28289	89.0777	4.33391	53.3003	5.43692	1.50221	0.604914
T3C;T41C	0.001252	0.000309068	31.123	3.32937	88.2865	3.93461	57.1634	5.1542	1.65869	0.699363
T3C;T41G	0.00530137	0.00528411	19.2226	3.0785	100	26.7016	80.7774	26.8785	0.793787	0.33297
T3C;G42A	0.00111362	0.000127371	21.7127	1.47484	83.7427	2.4517	62.0299	2.86111	1.77026	0.348229
T3C;G42C	0.000769291	0.000113371	26.1619	2.07307	84.1552	2.45198	57.9933	3.21089	2.01524	0.537363
T3C;G42T	0.0014269	0.000310138	30.0914	2.08993	86.1264	3.65626	56.035	4.21141	1.466	0.444619
T3C;C43A	0.00235562	0.0010296	25.7025	3.48397	91.2096	9.28168	65.5071	9.91401	1.21515	0.526708
T3C;C43G	0.0062456	0.00387791	16.4385	2.58322	64.3498	16.1454	47.9113	16.3508	1.83208	1.36796
T3C;C43T	0.000967536	0.000321863	20.7568	3.37547	80.587	6.07063	59.8303	6.94596	1.48785	0.717723
T3C;G44A	0.0459501	0.364067	5.54198	2.82234	100	164.798	94.458	164.822	0.387195	0.244421
T3C;G44C	0.0116473	0.0301276	78.7535	2.1353	100	27.8373	21.2465	27.9191	1.18967	1.67803
T3C;G44T	0.0028052	0.00460858	25.3821	3.56311	93.6113	23.2468	68.2293	23.5183	0.456227	0.169943
T3C;C45A	0.0326485	0.146503	20.4348	1.53804	100	378.717	79.5652	378.72	1.84937	2.69284
T3C;C45G	0.00769666	0.00169645	14.8434	1.38036	64.197	5.70487	49.3536	5.8695	4	1.83233
T3C;C45T	0.00246826	0.00895187	16.7765	6.4427	100	54.6855	83.2235	55.0637	0.401573	0.256481
T3C;G46A	6.82e-05	2.35e-05	39.8759	3.74727	90.2002	1.98972	50.3242	4.24276	0.797463	0.165355
T3C;G46C	0.00938983	0.00785896	39.676	1.54681	79.3172	17.383	39.6411	17.4517	1.30317	0.701197
T3C;G46T	1.25e-07	2.10991	32.7731	8.63821	57.0817	27.9659	24.3086	29.2696	9.03e-08	0.180284
T3C;G47A	2.91e-06	2.51e-05	72.2103	6.04501	81.6268	2.58528	9.41651	6.57463	0.794884	4.21816
T3C;G47C	NA	NA	NA	NA	NA	NA	NA	NA	NA	NA
T3C;G47T	NA	NA	NA	NA	NA	NA	NA	NA	NA	NA
T3C;G48A	NA	NA	NA	NA	NA	NA	NA	NA	NA	NA
T3C;G48C	NA	NA	NA	NA	NA	NA	NA	NA	NA	NA
T3C;G48T	NA	NA	NA	NA	NA	NA	NA	NA	NA	NA
T3C;G49A	1.56e-05	3.11e-05	26.7622	6.38793	40.6699	2.49551	13.9076	6.85808	4	34.2953
T3C;G49C	0.0104757	0.00350778	19.6024	2.296	55.5421	11.0797	35.9397	11.3151	4	3.9879
T3C;G49T	NA	NA	NA	NA	NA	NA	NA	NA	NA	NA
T3C;A50C	0.019422	0.519127	20.5207	2.5444	32.8112	468.446	12.2905	468.453	4	141.474
T3C;A50G	2.5	577.496	27.8416	9.57822	100	1334.4	72.1584	1334.44	0.137787	0.870215
T3C;A50T	2.5	789.56	21.5376	3.30518	7.82505	395.104	-13.7125	395.118	0.153871	1.38773
T3C;C51A	0.0460017	0.956029	43.2151	5.78118	100	170.828	56.7849	170.926	0.266787	0.378479
T3C;C51G	NA	NA	NA	NA	NA	NA	NA	NA	NA	NA
T3C;C51T	0.0119586	0.00653393	40.6785	5.33553	77.6025	27.039	36.924	27.5604	4	15.1632
T3C;G52A	3.75e-07	2.80984e+06	26.4148	12.6548	54.9648	1186067827	28.55	1186067827	1.11e-05	460.099
T3C;G52C	NA	NA	NA	NA	NA	NA	NA	NA	NA	NA
T3C;G52T	NA	NA	NA	NA	NA	NA	NA	NA	NA	NA
T3C;A53C	0.0244656	0.0683003	19.0793	2.03233	88.6083	147.578	69.529	147.592	1.48645	1.53579
T3C;A53G	0.00299023	0.00180052	26.8127	3.54521	79.7455	12.219	52.9328	12.7229	1.38026	0.841104
T3C;A53T	1.25e-07	0.000104974	14.968	5.55748	18.0217	3.51332	3.05371	6.57488	0.758602	136.42
T3C;C54A	NA	NA	NA	NA	NA	NA	NA	NA	NA	NA
T3C;C54G	0.0421863	1.27932	29.7646	3.62338	100	2965.51	70.2354	2965.51	2.10287	14.8577
T3C;C54T	NA	NA	NA	NA	NA	NA	NA	NA	NA	NA
T3C;C55A	0.000659214	7343.54	71.2	9.4974	88.9445	10.8865	17.7445	14.447	2.79e-08	0.137809
T3C;C55G	1.25e-07	0.954862	75.2688	5.98275	79.4627	10.6652	4.19391	12.2287	1.02e-07	0.455169
T3C;C55T	1.25e-07	0.461751	73.1018	6.56893	100	23.1773	26.8982	24.0902	5.07e-07	0.101396
T3C;C56A	NA	NA	NA	NA	NA	NA	NA	NA	NA	NA
T3C;C56G	0.0286502	0.0879184	10.4848	1.63377	100	171.453	89.5152	171.461	1.13867	0.80759
T3C;C56T	0.012544	0.0295465	54.4487	2.58946	100	42.2702	45.5513	42.3494	0.851556	0.652873
T3C;T57A	0.00168194	0.00266177	8.99504	4.23037	82.6133	26.2707	73.6183	26.6092	0.544275	0.247576
T3C;T57C	0.00103936	0.000129335	21.5142	1.65357	86.8224	2.83774	65.3082	3.28436	2.70691	0.730285
T3C;T57G	0.000526739	0.000194119	17.911	2.32095	52.5961	3.836	34.6851	4.48349	1.22623	0.477165
T3C;G58A	0.00314813	0.0439777	56.0588	7.43726	100	73.7615	43.9412	74.1355	0.250266	0.360114
T3C;G58C	0.0097347	0.167011	67.3785	6.49169	100	79.8656	32.6215	80.129	0.280828	0.475501
T3C;G58T	0.000143174	0.000776815	73.7556	5.29305	94.3853	15.3341	20.6298	16.222	0.311203	0.432165
T3C;C59A	0.0383422	0.48246	25.7919	2.03026	100	1283.27	74.2081	1283.28	2.1592	7.33687
T3C;C59G	1.25e-07	3.47411	9.17431	8.02674	36.6037	50.284	27.4293	50.9206	1e-07	0.255848
T3C;C59T	0.0128625	0.0611988	16.3973	4.72423	100	97.7043	83.6027	97.8185	0.493542	0.37472
T3C;A60C	0.00575455	0.0380601	67.6204	6.62094	100	51.7092	32.3796	52.1314	0.512015	0.835403
T3C;A60G	0.000605145	0.000626305	15.3486	5.08611	82.3411	14.611	66.9926	15.4709	0.603417	0.262957
T3C;A60T	0.0032248	0.00104195	13.6695	1.95274	64.5839	7.20115	50.9144	7.46121	1.84984	0.722408
T3C;G61A	0.00112084	0.00024677	24.7409	2.19203	78.1999	4.09375	53.459	4.64368	1.56722	0.540914
T3C;G61C	0.000505557	9.78e-05	45.5553	2.34822	92.3189	1.59158	46.7635	2.83678	1.56506	0.435905
T3C;G61T	0.00128079	0.000324958	20.0478	3.27152	88.5873	5.07668	68.5395	6.0395	1.46595	0.53691
T3C;A62C	0.000141498	5.98e-05	68.7664	3.15288	97.3718	1.0406	28.6054	3.32016	0.926208	0.247747
T3C;A62G	0.0103134	0.0713844	69.2972	4.59555	100	64.8474	30.7028	65.0101	0.630567	1.06941
T3C;A62T	0.000875762	0.000156271	67.6038	1.42526	98.547	1.07208	30.9433	1.78345	0.997116	0.183255
T3C;G63A	0.00141714	0.000110596	19.1358	1.56846	91.2642	1.44023	72.1284	2.1294	2.30541	0.377357
T3C;G63C	0.00103591	3.54e-05	26.652	0.791637	96.5552	0.309645	69.9032	0.850041	2.10541	0.121452
T3C;G63T	0.000568123	3.4e-05	11.9017	1.04985	95.6324	0.666637	83.7307	1.24362	1.60195	0.132497
T3C;A64C	0.00102865	8.16e-05	21.2116	1.60786	95.7836	0.981662	74.572	1.88385	1.69493	0.210327
T3C;A64G	0.000666028	0.000119642	63.0597	2.01766	94.0581	1.17493	30.9984	2.33483	2.11354	0.661978
T3C;A64T	0.00082271	8.63e-05	14.2403	1.85669	94.2404	1.55365	80.0001	2.42097	1.53784	0.238332
T3C;G65A	0.0003673	8.33e-05	11.9933	3.56605	95.7263	1.86111	83.733	4.02249	1.3738	0.292914
T3C;G65C	0.00119076	0.000197837	13.271	4.30993	87.9745	4.28087	74.7035	6.07465	4	3.42764
T3C;G65T	0.000790878	0.000102868	10.9148	2.30017	94.5693	1.9344	83.6545	3.00545	1.42801	0.268408
T3C;G66A	0.000696804	0.000122405	13.8162	3.2409	94.3575	2.24593	80.5414	3.94305	1.80764	0.514035
T3C;G66C	0.000154389	1.26e-05	20.152	1.73059	97.4156	0.406776	77.2636	1.77775	1.2915	0.0807854
T3C;G66T	0.000220572	4.41e-05	21.7105	3.09802	98.5271	1.63644	76.8166	3.50367	0.805321	0.101469
T3C;C67A	0.000201163	0.000218764	41.3225	7.12627	100	10.149	58.6775	12.4011	0.467178	0.208499
T3C;C67G	0.000391547	0.00015047	13.5366	3.55344	69.442	6.24426	55.9054	7.18454	1.86241	1.06035
T3C;C67T	0.00050387	0.000193549	41.3387	3.8974	79.5959	4.57069	38.2572	6.00674	2.08649	1.78082
T3C;T68A	0.000301309	0.000162049	27.3977	7.19661	92.8949	5.60014	65.4972	9.11881	1.0729	0.471425
T3C;T68C	0.000792385	0.00017088	17.5376	3.48534	88.8299	3.91597	71.2923	5.24237	2.02324	0.790823
T3C;T68G	0.00207639	0.000463434	8.11782	1.46294	70.8492	5.69949	62.7313	5.88425	2.01646	0.631843
T3C;G69A	0.00082712	0.000165739	50.2178	3.5418	94.6027	1.72615	44.385	3.94004	3.06667	1.28925
T3C;G69C	0.000649145	0.000138584	43.2556	3.99439	95.4049	1.69532	52.1493	4.33927	2.45165	0.905662
T3C;G69T	0.000903174	0.00014342	50.9371	2.71651	96.9398	1.12655	46.0027	2.94084	2.79016	0.861798
T3C;A70C	0.000774362	0.000245906	23.3349	6.64299	100	2.52713	76.6651	7.10744	1.21641	0.410371
T3C;A70G	0.00971677	0.00209263	14.0224	1.21552	64.8555	8.14447	50.8331	8.23468	2.55417	0.853739
T3C;A70T	0.000978009	0.000176529	32.7001	2.7417	96.2385	2.20453	63.5384	3.51808	1.27242	0.285004
T3C;A71C	0.000652449	0.000108379	28.4752	3.16071	95.3329	1.43649	66.8577	3.47183	1.83084	0.462806
T3C;A71G	0.000835024	0.000123468	18.942	2.69939	97.5224	1.61352	78.5804	3.14486	1.43091	0.279418
T3C;A71T	0.00107819	0.000273858	14.1643	3.4906	99.2709	4.78125	85.1065	5.91985	0.980679	0.23539
T3C;A72C	0.00121331	7.13e-05	26.137	1.17523	97.5432	0.61824	71.4062	1.32792	1.52237	0.112067
T3C;A72G	0.000366107	9.12e-05	31.9924	4.50399	97.8178	1.07151	65.8254	4.62969	1.52203	0.399285
T3C;A72T	0.000618265	0.000114141	39.0651	2.67981	94.7239	1.56748	55.6587	3.10457	1.24009	0.26828
T3G;C4A	0.00116484	0.00807933	27.4844	8.73647	100	67.4695	72.5156	68.0327	0.302163	0.314793
T3G;C4G	1.13e-05	1.86e-05	26.824	10.7517	68.133	3.84524	41.309	11.4186	4	62.9716
T3G;C4T	0.00023441	0.000453647	24.3554	6.89362	97.9803	21.342	73.6249	22.4277	0.368941	0.20582
T3G;A5C	0.000415043	0.00109957	51.2331	12.6402	100	23.3508	48.7669	26.5525	0.451884	0.45965
T3G;A5G	0.000142605	5.59e-05	37.8705	3.77253	97.3916	3.16267	59.5211	4.92286	0.565579	0.114239
T3G;A5T	3.85e-05	1.74e-05	9.44003	4.92009	54.4249	4.81503	44.9849	6.88417	1.53032	0.849847
T3G;G6A	1.82e-05	2.13e-05	80.5764	3.78972	95.5457	1.58456	14.9693	4.10765	0.62439	0.480116
T3G;G6C	0.0124336	0.15497	82.7688	3.81573	100	48.8549	17.2312	49.0037	0.451335	0.970649
T3G;G6T	2.8e-05	1.07e-05	70.706	2.3282	94.0652	0.745613	23.3592	2.44468	0.794343	0.21145
T3G;C7A	0.00695103	0.0421876	87.7687	1.94188	100	15.807	12.2313	15.9258	0.430549	0.515559
T3G;C7G	0.000250642	0.000208441	88.7683	0.955212	95.8255	0.503141	7.05714	1.07962	4	4.74711
T3G;C7T	0.000163812	0.000166353	79.3614	3.20089	97.3543	2.5956	17.993	4.12102	0.531752	0.27138
T3G;C8A	6.25e-05	2.98e-05	62.5523	4.31977	97.6044	1.01332	35.0521	4.43703	0.73499	0.169878
T3G;C8G	5.08e-06	8.11e-06	81.3207	2.87446	95.5213	1.12979	14.2006	3.08852	0.585307	0.52191
T3G;C8T	0.000200486	5.66e-05	68.6222	2.19164	95.3161	0.675797	26.6939	2.29346	1.44996	0.36453
T3G;G9A	0.00430533	0.000560213	15.8842	1.07453	92.9364	4.09024	77.0521	4.22903	1.41409	0.191111
T3G;G9C	0.0267926	0.0294369	11.6054	0.746528	100	77.2788	88.3946	77.2824	1.50545	0.564419
T3G;G9T	0.0175787	0.0159717	16.9313	1.76249	100	75.7171	83.0687	75.7376	2.46985	2.28647
T3G;G10A	0.00118429	7.23e-05	30.3128	0.895318	95.1371	0.915545	64.8242	1.28055	1.26584	0.101885
T3G;G10C	0.0115691	0.0355202	20.19	3.87667	100	71.4413	79.81	71.5464	0.601045	0.39029
T3G;G10T	0.0121337	0.0150461	13.8942	1.90218	100	43.9063	86.1058	43.9475	0.892577	0.35048
T3G;A11C	0.00898992	0.0159579	18.9738	4.01208	100	52.1624	81.0262	52.3165	0.803357	0.486914
T3G;A11G	0.000194947	5.12e-05	52.158	3.48159	95.1195	0.984081	42.9615	3.61799	1.55436	0.377235
T3G;A11T	0.0113527	0.0223853	15.8706	2.67596	100	58.425	84.1294	58.4863	0.768298	0.408557
T3G;A12C	0.00700105	0.00378569	11.5645	1.62844	82.931	17.5498	71.3665	17.6252	1.19129	0.381957
T3G;A12G	0.00056294	0.00011945	29.212	2.85131	89.0012	2.4522	59.7893	3.76075	1.19364	0.291547
T3G;A12T	0.0380334	0.129891	11.4714	1.3116	100	182.032	88.5286	182.037	1.03752	0.657273
T3G;G13A	3.57e-05	2.25e-05	71.5166	3.88533	93.4407	1.36128	21.9242	4.1169	0.905408	0.441409
T3G;G13C	0.000236343	7.07e-05	34.965	3.11434	87.7963	2.45802	52.8314	3.96749	0.840574	0.170381
T3G;G13T	6.56e-05	2.76e-05	32.4404	3.94725	90.3605	3.16394	57.9201	5.05879	0.612894	0.149066
T3G;C14A	0.0393019	30.338	50.5711	2.10442	100	120743	49.4289	120743	4	542.101
T3G;C14G	0.0375187	19.8425	43.5489	2.36013	100	91474.9	56.4511	91474.9	4	433.044
T3G;C14T	0.0120463	0.0257334	35.8913	2.49527	75.1631	42.3576	39.2717	42.431	1.14195	1.14106
T3G;G15A	1.25e-07	2.17929	15.8416	4.3482	16.7403	7.6065	0.898674	8.76161	1.24e-07	1.48809
T3G;G15C	0.0159383	0.162251	45.89	5.78511	85.2638	117.386	39.3739	117.528	0.574875	1.10336
T3G;G15T	0.00924865	0.00676692	23.1778	1.73488	57.8809	15.9321	34.7032	16.0262	1.73202	1.26866
T3G;G16A	1.25e-07	4.04457	11.8577	4.51219	16.5105	12.6544	4.65278	13.4348	2.24e-08	0.582484
T3G;G16C	0.0464839	0.314535	25.1287	1.92788	100	366.567	74.8713	366.572	1.18563	1.5175
T3G;G16T	0.0144133	0.0135491	20.3178	1.56845	45.5976	28.5817	25.2799	28.6247	4	13.3605
T3G;G17A	0.0256405	0.0581755	30.8516	1.67209	100	103.203	69.1484	103.216	1.26447	0.915476
T3G;G17C	0.000826137	0.00182608	73.0007	2.99838	68.4559	3.48499	-4.54472	4.59733	4	18.453
T3G;G17T	0.0210809	0.0409648	25.5872	1.662	94.7722	63.6113	69.185	63.633	0.933095	0.471882
T3G;A18C	0.0097972	0.00362814	17.6915	1.57287	41.8269	7.20631	24.1354	7.37596	4	3.82764
T3G;A18G	2.5	161.177	18.23	2.88301	70.1108	642.158	51.8808	642.165	0.27889	0.563625
T3G;A18T	0.0129128	0.00531654	16.7704	0.881199	31.0764	8.00968	14.306	8.05801	4	9.17383
T3G;C19A	NA	NA	NA	NA	NA	NA	NA	NA	NA	NA
T3G;C19G	NA	NA	NA	NA	NA	NA	NA	NA	NA	NA
T3G;C19T	0.0367236	0.214705	15.2113	1.67839	100	519.097	84.7887	519.1	1.74195	2.72499
T3G;G20A	0.108555	204397	71.3542	2.4898	87.6457	3.90528	16.2915	4.63144	4.23e-08	0.0790416
T3G;G20C	0.0105132	0.00319839	14.2746	1.51748	38.0711	6.59584	23.7966	6.76815	4	4.14325
T3G;G20T	1.25e-07	1.07082	68.595	9.58822	82.027	20.7682	13.432	22.8747	7.56e-08	0.254131
T3G;A21C	0.132634	2.31105	15.5338	2.12905	100	693.859	84.4662	693.863	0.698339	0.982406
T3G;A21G	0.000281433	0.000123623	35.7072	4.27322	99.9288	4.47813	64.2216	6.18984	0.559143	0.127732
T3G;A21T	0.00405746	0.00118019	22.9325	2.21678	63.6108	5.89058	40.6784	6.29389	2.18029	1.27936
T3G;C22A	0.0359441	0.315789	52.7026	3.30213	100	127.24	47.2974	127.283	0.559221	0.693498
T3G;C22G	0.0337114	3.06429	12.6789	1.90695	100	22280.3	87.3211	22280.3	4	104.848
T3G;C22T	0.177572	4.42675	12.4705	2.45502	100	1034.75	87.5295	1034.76	0.67855	1.17892
T3G;C23A	0.014662	0.0180141	29.0223	1.17853	46.4494	25.5313	17.4271	25.5585	4	16.4452
T3G;C23G	0.000361724	0.00102882	84.6386	4.98583	74.5705	6.26036	-10.0682	8.00316	0.852754	1.87129
T3G;C23T	0.0668866	0.314489	17.6065	1.59028	100	122.488	82.3935	122.499	0.535836	0.256792
T3G;C24A	0.0333184	12.4304	57.1684	2.85953	100	44379.5	42.8316	44379.5	4	445.279
T3G;C24G	0.0657726	5829.48	75.9037	2.08119	100	8.14979e+06	24.0963	8.14979e+06	4	9563.57
T3G;C24T	NA	NA	NA	NA	NA	NA	NA	NA	NA	NA
T3G;G25A	0.0187263	0.0361033	13.6691	1.16882	38.988	46.6891	25.3189	46.7038	2.17695	3.28231
T3G;G25C	0.0271781	0.0961176	20.9571	2.43884	100	126.294	79.0429	126.318	0.851224	0.63828
T3G;G25T	0.00786008	0.00288652	36.2273	2.22216	66.1128	6.21191	29.8855	6.59741	4	2.97795
T3G;T26A	0.000668915	0.000101648	44.309	2.38467	95.4787	0.977288	51.1697	2.57716	1.60892	0.340707
T3G;T26C	0.000392216	6.26e-05	34.4314	2.62915	97.1275	0.692801	62.6961	2.7189	1.94539	0.377592
T3G;T26G	0.00103002	0.000104927	50.7412	1.3517	96.2502	0.824884	45.5089	1.58352	1.33737	0.167752
T3G;T27A	0.000764996	7.66e-05	32.3104	1.88888	94.9166	0.784989	62.6062	2.0455	1.90335	0.303726
T3G;T27C	0.000502553	7.36e-05	60.645	2.0987	97.3783	0.531617	36.7333	2.16498	2.13013	0.485571
T3G;T27G	0.00231935	0.000344221	24.1559	2.25033	81.704	2.28504	57.5481	3.20708	3.08153	0.902469
T3G;T28A	0.00094134	6.86e-05	32.3679	1.42248	97.1778	0.635598	64.8099	1.55802	1.58157	0.159816
T3G;T28C	0.000984039	7.02e-05	36.4577	1.39875	96.4535	0.588688	59.9958	1.51758	1.73601	0.184685
T3G;T28G	0.000853199	0.000568231	63.8395	3.26778	94.8864	4.93291	31.047	5.9171	0.633701	0.266954
T3G;T29A	0.00134571	0.000118947	27.5514	1.99624	95.55	1.01012	67.9985	2.23725	2.09377	0.333497
T3G;T29C	0.000239145	6.79e-05	75.8189	1.51789	98.164	0.722592	22.3451	1.68111	0.747032	0.132923
T3G;T29G	0.0027993	0.000617353	17.0156	2.78845	92.6904	5.64085	75.6748	6.29243	1.36662	0.361929
T3G;C30A	0.00212127	0.000301506	19.6801	2.21508	95.421	2.89681	75.7409	3.64666	1.64213	0.321325
T3G;C30G	0.0020022	0.000324922	19.78	2.19934	88.7057	3.29213	68.9257	3.9592	1.5507	0.342344
T3G;C30T	0.000986659	0.00019543	22.3273	3.33166	97.6346	2.93211	75.3073	4.43815	1.22529	0.303702
T3G;C31A	0.00216796	0.000527308	11.7024	1.66219	95.8298	6.22617	84.1273	6.44422	0.960423	0.176105
T3G;C31G	0.00111384	9.29e-05	23.4835	1.56175	94.3588	1.24093	70.8753	1.99473	1.496	0.184712
T3G;C31T	0.00129244	5.95e-05	21.706	0.911311	93.525	0.738109	71.819	1.17273	2.05991	0.18703
T3G;C32A	0.000511083	9.93e-05	30.5661	3.75494	97.1108	1.23955	66.5447	3.95425	1.80948	0.468086
T3G;C32G	0.000168138	6.01e-05	45.9284	4.36308	94.2443	1.6842	48.3159	4.67686	1.12817	0.311494
T3G;C32T	0.000643498	6.2e-05	30.6795	2.03268	94.4604	0.948078	63.7809	2.24291	2.32276	0.391593
T3G;T33A	0.000469983	4.56e-05	41.1571	1.6592	95.9785	0.530991	54.8214	1.7421	2.12781	0.311656
T3G;T33C	0.00037929	0.000117943	53.3296	3.42523	96.5938	1.65367	43.2642	3.80352	0.959824	0.251472
T3G;T33G	0.00222121	0.00206053	83.0686	1.6438	91.1547	2.58193	8.08608	3.06079	1.50197	1.85639
T3G;C34A	0.000498564	3.65e-05	42.0062	1.29655	97.3679	0.3314	55.3616	1.33823	1.98029	0.196938
T3G;C34G	0.000424412	8.49e-05	51.5743	2.40531	91.066	1.36346	39.4916	2.76488	2.19974	0.887504
T3G;C34T	0.000579166	4.44e-05	32.4474	1.49645	94.7064	0.661453	62.259	1.63612	2.18018	0.271229
T3G;T35A	0.000383628	6.96e-05	41.7578	2.41542	96.2142	1.16485	54.4564	2.68163	1.0201	0.157761
T3G;T35C	0.000642612	0.000127322	62.2356	2.18811	95.984	0.975508	33.7484	2.39571	1.57986	0.426803
T3G;T35G	0.000675644	9.15e-05	55.3204	1.70116	95.8806	0.695434	40.5602	1.83781	1.51501	0.265248
T3G;T36A	0.000465106	0.000122	32.4323	3.63318	95.5915	2.60269	63.1592	4.46923	0.89485	0.200306
T3G;T36C	0.00126876	0.000832621	9.06282	2.68066	89.3046	11.9209	80.2418	12.2185	0.599452	0.146564
T3G;T36G	9.75e-05	3.07e-05	63.538	2.65433	94.362	0.899663	30.824	2.80265	0.993062	0.211172
[truncated: 21,222 more rows]

## Sheet: Biochemical Consensus
Variant	Replicate A	Replicate B	Average	R	Y	Assignment
T1A	0.237681	0.265416	0.251548	0.387594		H
T1C	0.324638	0.297587	0.311112		0.612406
T1G	0.124638	0.147453	0.136045
T1	0.313043	0.289544	0.301294
T2A	0.282555	0.285714	0.284135	0.517433		N
T2C	0.223587	0.205514	0.214551		0.482567
T2G	0.228501	0.238095	0.233298
T2	0.265356	0.270677	0.268016
T3A	0.235849	0.247619	0.241734	0.527246		N
T3C	0.216981	0.216667	0.216824		0.472754
T3G	0.292453	0.278571	0.285512
T3	0.254717	0.257143	0.25593
C4A	0.181208	0.172662	0.176935	0.334689		Y
C4	0.369128	0.388489	0.378808		0.665311
C4G	0.16443	0.151079	0.157754
C4T	0.285235	0.28777	0.286502
A5	0.340625	0.360656	0.35064	0.686757		V
A5C	0.271875	0.209836	0.240856		0.313243
A5G	0.33125	0.340984	0.336117
A5T	0.05625	0.0885246	0.0723873
G6A	0.168224	0.241525	0.204875	0.693034		G
G6C	0.121495	0.127119	0.124307		0.306966
G6	0.518692	0.457627	0.488159
G6T	0.191589	0.173729	0.182659
C7A	0.155629	0.195046	0.175338	0.306901		Y
C7	0.364238	0.337461	0.35085		0.693099
C7G	0.142384	0.120743	0.131564
C7T	0.337748	0.346749	0.342249
C8A	0.317568	0.312796	0.315182	0.464209		H
C8	0.245495	0.255924	0.25071		0.535791
C8G	0.146396	0.151659	0.149028
C8T	0.290541	0.279621	0.285081
G9A	0.304762	0.32243	0.313596	0.834891		R
G9C	0.0761905	0.0841121	0.0801513		0.165109
G9	0.528571	0.514019	0.521295
G9T	0.0904762	0.0794393	0.0849577
G10A	0.248299	0.301948	0.275124	0.639147		V
G10C	0.217687	0.217532	0.21761		0.360853
G10	0.37415	0.353896	0.364023
G10T	0.159864	0.126623	0.143244
A11	0.367893	0.380623	0.374258	0.780867		R
A11C	0.130435	0.0968858	0.11366		0.219133
A11G	0.397993	0.415225	0.406609
A11T	0.103679	0.107266	0.105473
A12	0.466387	0.458333	0.46236	0.851453		R
A12C	0.0882353	0.1	0.0941176		0.148547
A12G	0.382353	0.395833	0.389093
A12T	0.0630252	0.0458333	0.0544293
G13A	0.289256	0.293151	0.291203	0.589279		N
G13C	0.187328	0.189041	0.188184		0.410721
G13	0.297521	0.29863	0.298075
G13T	0.225895	0.219178	0.222537
C14A	0	0.00806452	0.00403226	0.016229		C
C14	0.917355	0.895161	0.906258		0.983771
C14G	0.00826446	0.016129	0.0121967
C14T	0.0743802	0.0806452	0.0775127
G15A	0.0215827	0.0220588	0.0218208	0.82919		G
G15C	0.107914	0.0955882	0.101751		0.17081
G15	0.798561	0.816176	0.807369
G15T	0.0719424	0.0661765	0.0690595
G16A	0	0	0	0.982301		G
G16C	0.00884956	0.00884956	0.00884956		0.0176991
G16	0.982301	0.982301	0.982301
G16T	0.00884956	0.00884956	0.00884956
G17A	0.0163934	0.016	0.0161967	0.915115		G
G17C	0.0163934	0.04	0.0281967		0.0848852
G17	0.909836	0.888	0.898918
G17T	0.057377	0.056	0.0566885
A18	0.940678	0.925	0.932839	0.94541		A
A18C	0.0508475	0.05	0.0504237		0.0545904
A18G	0.00847458	0.0166667	0.0125706
A18T	0	0.00833333	0.00416667
C19A	0	0	0	0		C
C19	0.973684	0.991071	0.982378		1
C19G	0	0	0
C19T	0.0263158	0.00892857	0.0176222
G20A	0.0650407	0.0338983	0.0494695	0.971028		G
G20C	0.0243902	0.0254237	0.024907		0.028972
G20	0.902439	0.940678	0.921558
G20T	0.00813008	0	0.00406504
A21	0.438247	0.421456	0.429851	0.85143		R
A21C	0.0557769	0.0536398	0.0547084		0.14857
A21G	0.406375	0.436782	0.421578
A21T	0.0996016	0.0881226	0.0938621
C22A	0.0347826	0.0338983	0.0343405	0.0343405		C
C22	0.965217	0.940678	0.952948		0.96566
C22G	0	0	0
C22T	0	0.0254237	0.0127119
C23A	0.0151515	0.0078125	0.011482	0.0152699		C
C23	0.840909	0.867188	0.854048		0.98473
C23G	0.00757576	0	0.00378788
C23T	0.136364	0.125	0.130682
C24A	0.00694444	0.00671141	0.00682793	0.0274282		C
C24	0.770833	0.744966	0.7579		0.972572
C24G	0.0277778	0.0134228	0.0206003
C24T	0.194444	0.234899	0.214672
G25A	0.070922	0.0625	0.066711	0.845745		G
G25C	0.0638298	0.0833333	0.0735816		0.154255
G25	0.787234	0.770833	0.779034
G25T	0.0780142	0.0833333	0.0806738
T26A	0.205805	0.220657	0.213231	0.410476		N
T26C	0.316623	0.323944	0.320283		0.589524
T26G	0.192612	0.201878	0.197245
T26	0.28496	0.253521	0.269241
T27A	0.235795	0.272727	0.254261	0.385718		H
T27C	0.323864	0.294766	0.309315		0.614282
T27G	0.130682	0.132231	0.131457
T27	0.309659	0.300275	0.304967
T28A	0.286667	0.300971	0.293819	0.39246		H
T28C	0.243333	0.255663	0.249498		0.60754
T28G	0.106667	0.0906149	0.0986408
T28	0.363333	0.352751	0.358042
T29A	0.254958	0.260989	0.257973	0.39739		H
T29C	0.300283	0.296703	0.298493		0.60261
T29G	0.135977	0.142857	0.139417
T29	0.308782	0.299451	0.304116
C30A	0.247813	0.238938	0.243376	0.372361		H
C30	0.3207	0.324484	0.322592		0.627639
C30G	0.137026	0.120944	0.128985
C30T	0.294461	0.315634	0.305047
C31A	0.173913	0.166189	0.170051	0.408167		N
C31	0.338509	0.312321	0.325415		0.591833
C31G	0.229814	0.246418	0.238116
C31T	0.257764	0.275072	0.266418
C32A	0.262443	0.267391	0.264917	0.496828		N
C32	0.244344	0.234783	0.239563		0.503172
C32G	0.242081	0.221739	0.23191
C32T	0.251131	0.276087	0.263609
T33A	0.325513	0.334294	0.329904	0.414238		H
T33C	0.266862	0.270893	0.268878		0.585762
T33G	0.0879765	0.0806916	0.0843341
T33	0.319648	0.314121	0.316885
C34A	0.244186	0.274892	0.259539	0.501923		N
C34	0.251163	0.233766	0.242465		0.498077
C34G	0.248837	0.235931	0.242384
C34T	0.255814	0.255411	0.255613
T35A	0.257985	0.271028	0.264507	0.476406		N
T35C	0.265356	0.261682	0.263519		0.523594
T35G	0.208845	0.214953	0.211899
T35	0.267813	0.252336	0.260075
T36A	0.257143	0.293814	0.275479	0.579468		D
T36C	0.161039	0.115979	0.138509		0.420532
T36G	0.298701	0.309278	0.30399
T36	0.283117	0.280928	0.282022
T37A	0.246341	0.244706	0.245524	0.522152		N
T37C	0.212195	0.223529	0.217862		0.477848
T37G	0.27561	0.277647	0.276628
T37	0.265854	0.254118	0.259986
C38A	0.24821	0.242857	0.245534	0.502978		N
C38	0.257757	0.257143	0.25745		0.497022
C38G	0.252983	0.261905	0.257444
C38T	0.24105	0.238095	0.239573
A39	0.261501	0.261501	0.261501	0.513317		N
A39C	0.256659	0.249395	0.253027		0.486683
A39G	0.251816	0.251816	0.251816
A39T	0.230024	0.237288	0.233656
T40A	0.255583	0.248193	0.251888	0.480418		N
T40C	0.253102	0.257831	0.255467		0.519582
T40G	0.223325	0.233735	0.22853
T40	0.26799	0.260241	0.264116
T41A	0.268041	0.26601	0.267026	0.470932		N
T41C	0.255155	0.258621	0.256888		0.529068
T41G	0.198454	0.20936	0.203907
T41	0.278351	0.26601	0.27218
G42A	0.242131	0.249433	0.245782	0.498982		N
G42C	0.254237	0.247166	0.250701		0.501018
G42	0.261501	0.244898	0.2532
G42T	0.242131	0.258503	0.250317
C43A	0.242604	0.251397	0.247	0.376335		H
C43	0.322485	0.304469	0.313477		0.623665
C43G	0.130178	0.128492	0.129335
C43T	0.304734	0.315642	0.310188
G44A	0.104575	0.0743243	0.0894497	0.451676		B
G44C	0.30719	0.310811	0.309		0.548324
G44	0.356209	0.368243	0.362226
G44T	0.232026	0.246622	0.239324
C45A	0.0884956	0.114894	0.101695	0.192751		C
C45	0.49115	0.468085	0.479618		0.807249
C45G	0.0884956	0.093617	0.0910563
C45T	0.331858	0.323404	0.327631
G46A	0.357988	0.360856	0.359422	0.687331		V
G46C	0.213018	0.2263	0.219659		0.312669
G46	0.322485	0.333333	0.327909
G46T	0.106509	0.0795107	0.0930098
G47A	0.175676	0.175141	0.175408	0.736143		G
G47C	0.157658	0.0903955	0.124027		0.263857
G47	0.5	0.621469	0.560734
G47T	0.166667	0.112994	0.139831
G48A	0.0729927	0.0546875	0.0638401	0.902543		G
G48C	0.0145985	0.015625	0.0151118		0.0974567
G48	0.810219	0.867188	0.838703
G48T	0.10219	0.0625	0.0823449
G49A	0.0258621	0.0252101	0.0255361	0.970371		G
G49C	0.0172414	0.0168067	0.0170241		0.0296291
G49	0.956897	0.932773	0.944835
G49T	0	0.0252101	0.012605
A50	0.792857	0.804348	0.798602	0.942547		A
A50C	0.0285714	0.0217391	0.0251553		0.0574534
A50G	0.135714	0.152174	0.143944
A50T	0.0428571	0.0217391	0.0322981
C51A	0	0	0	0		C
C51	0.925	0.895161	0.910081		1
C51G	0	0	0
C51T	0.075	0.104839	0.0899194
G52A	0.0338983	0.0263158	0.030107	0.987288		G
G52C	0.0254237	0	0.0127119		0.0127119
G52	0.940678	0.973684	0.957181
G52T	0	0	0
A53	0.552239	0.546798	0.549518	0.881112		R
A53C	0.104478	0.0837438	0.0941107		0.118888
A53G	0.313433	0.349754	0.331593
A53T	0.0298507	0.0197044	0.0247776
C54A	0.00884956	0	0.00442478	0.00442478		C
C54	0.982301	0.982301	0.982301		0.995575
C54G	0	0	0
C54T	0.00884956	0.0176991	0.0132743
C55A	0.046875	0.0582011	0.052538	0.0603919		Y
C55	0.578125	0.582011	0.580068		0.939608
C55G	0.0104167	0.00529101	0.00785384
C55T	0.364583	0.354497	0.35954
C56A	0.140097	0.128866	0.134481	0.179902		Y
C56	0.531401	0.56701	0.549206		0.820098
C56G	0.0289855	0.0618557	0.0454206
C56T	0.299517	0.242268	0.270892
T57A	0.198777	0.191223	0.195	0.290913		H
T57C	0.363914	0.373041	0.368478		0.709087
T57G	0.100917	0.0909091	0.0959133
T57	0.336391	0.344828	0.34061
G58A	0.26738	0.297082	0.282231	0.571189		N
G58C	0.235294	0.204244	0.219769		0.428811
G58	0.291444	0.286472	0.288958
G58T	0.205882	0.212202	0.209042
C59A	0.267898	0.260579	0.264239	0.504516		N
C59	0.249423	0.240535	0.244979		0.495484
C59G	0.235566	0.244989	0.240277
C59T	0.247113	0.253898	0.250505
A60	0.310541	0.305322	0.307932	0.594616		V
A60C	0.267806	0.27451	0.271158		0.405384
A60G	0.282051	0.291317	0.286684
A60T	0.139601	0.128852	0.134226
G61A	0.244898	0.224018	0.234458	0.481619		N
G61C	0.260771	0.256351	0.258561		0.518381
G61	0.244898	0.249423	0.24716
G61T	0.249433	0.270208	0.25982
A62	0.291892	0.283465	0.287678	0.470004		N
A62C	0.316216	0.333333	0.324775		0.529996
A62G	0.175676	0.188976	0.182326
A62T	0.216216	0.194226	0.205221
G63A	0.21327	0.220779	0.217025	0.46187		N
G63C	0.21564	0.24026	0.22795		0.53813
G63	0.255924	0.233766	0.244845
G63T	0.315166	0.305195	0.31018
A64	0.25058	0.23176	0.24117	0.506729		N
A64C	0.185615	0.229614	0.207614		0.493271
A64G	0.271462	0.259657	0.265559
A64T	0.292343	0.27897	0.285657
G65A	0.27529	0.270799	0.273045	0.450688		N
G65C	0.268657	0.274062	0.271359		0.549312
G65	0.179104	0.176183	0.177644
G65T	0.276949	0.278956	0.277952
G66A	0.274112	0.274021	0.274067	0.461522		N
G66C	0.28934	0.313167	0.301254		0.538478
G66	0.182741	0.192171	0.187456
G66T	0.253807	0.220641	0.237224
C67A	0.183735	0.195783	0.189759	0.400602		N
C67	0.328313	0.325301	0.326807		0.599398
C67G	0.222892	0.198795	0.210843
C67T	0.26506	0.28012	0.27259
T68A	0.238636	0.229885	0.234261	0.430136		N
T68C	0.284091	0.235632	0.259862		0.569864
T68G	0.167614	0.224138	0.195876
T68	0.309659	0.310345	0.310002
G69A	0.161172	0.2	0.180586	0.589543		G
G69C	0.285714	0.237736	0.261725		0.410457
G69	0.406593	0.411321	0.408957
G69T	0.14652	0.150943	0.148732
A70	0.214712	0.223602	0.219157	0.475711		N
A70C	0.280318	0.271222	0.27577		0.524289
A70G	0.258449	0.254658	0.256554
A70T	0.246521	0.250518	0.248519
A71	0.210938	0.200743	0.20584	0.470529		N
A71C	0.246094	0.241636	0.243865		0.529471
A71G	0.261719	0.267658	0.264688
A71T	0.28125	0.289963	0.285606
A72	0.222222	0.213018	0.21762	0.509539		N
A72C	0.240741	0.248521	0.244631		0.490461
A72G	0.286008	0.29783	0.291919
A72T	0.251029	0.240631	0.24583
