# Supplementary material
Source: HighWire-hosted journal article supplement (doi:10.1101/rna.079560.122)
Supplement: Supplemental_Information_SMARTI_Replicate_PC.xlsx [file Supplemental_Information_SMARTI_Replicate_PC.xlsx]

## Sheet: RepA %Cleaved
variant	0uM_G_Reads	0uM_G_PC	12500nM_G_Reads	12500nM_G_PC	12500uM_G_Reads	12500uM_G_PC	1250uM_G_Reads	1250uM_G_PC	125uM_G_Reads	125uM_G_PC	2500uM_G_Reads	2500uM_G_PC	25mM_G_Reads	25mM_G_PC	500uM_G_Reads	500uM_G_PC	50uM_G_Reads	50uM_G_PC	5mM_G_Reads	5mM_G_PC
Conc.	0	0	0	1.25e-05	0	0.0125	0	0.00125	0	0.000125	0	0.0025	0	0.025	0	0.0005	0	5e-05	0	0.005
WT	738014	5.60274	791017	6.22389	590551	59.0662	811921	16.2616	651639	7.89947	676438	26.242	632575	61.4879	757243	9.66031	907605	6.76241	741358	44.8168
T1A	10122	4.11974	10458	4.52285	7026	45.1751	10692	10.5032	8761	5.55873	8722	18.31	7724	44.8343	10400	6.5	12248	5.47845	9261	33.2254
T1C	7650	10.1961	8265	12.0508	6261	74.5887	8678	36.3909	6938	15.8259	7016	51.1688	6763	74.3901	8071	19.4276	9526	15.1795	8159	68.2559
T1G	9132	19.032	9755	21.7324	6803	57.1954	9756	26.8245	8199	21.9539	7888	32.2008	7452	58.3468	8990	19.4216	10926	20.95	8822	46.1007
T2A	6556	8.20622	7596	8.96524	4685	74.4717	7184	40.0612	6346	14.7494	5456	54.6004	5102	78.9298	7278	20.9536	9302	11.4169	6144	71.0938
T2C	6948	5.42602	6950	6.96403	3495	59.8856	6502	19.717	6123	8.77021	4638	31.1557	3663	62.7628	6672	8.82794	8144	7.30599	4556	47.9368
T2G	8806	12.0145	8711	13.9823	7560	72.1825	9663	30.6323	7682	16.0245	7823	45.3407	8477	73.3042	8817	17.0806	10983	14.4223	9829	65.3881
T3A	7342	5.61155	7621	7.47933	2788	55.5595	4699	38.0719	5773	12.5758	3505	43.3096	2844	59.3179	5916	19.3712	8638	11.3452	3400	55.8824
T3C	5209	6.56556	5542	7.81306	2634	57.3652	4483	30.716	4513	10.082	3182	40.9805	2803	61.8266	5082	13.3806	6377	9.23632	3324	55.6558
T3G	7482	13.0446	8044	18.9209	6030	80.4478	7955	62.5896	6893	26.9114	6383	70.9854	6415	84.3648	7645	37.8548	9470	22.661	7307	80.4571
C4A	5159	8.25741	4808	16.1814	1941	41.8856	2959	38.3576	2852	28.9271	2499	34.894	2055	44.4282	3484	27.9277	5367	20.5515	2481	45.1431
C4G	4754	17.7114	4908	32.009	3242	53.2079	4096	50.6104	3759	45.411	3758	45.0506	3568	50.7287	4655	37.8088	6024	33.6985	3830	52.8198
C4T	7806	5.99539	7864	10.8723	3312	49.8792	4684	38.813	5315	16.8579	3852	39.2264	3434	52.7373	5631	23.6725	8307	14.1086	3889	48.7272
A5C	5888	7.82948	5589	6.65593	2668	46.5142	5522	20.3006	4653	7.50054	3692	26.6522	2770	49.4946	5708	7.88367	6963	7.84145	3321	39.8073
A5G	6448	6.83933	7238	8.85604	3297	65.2411	5971	36.7778	5943	11.6776	4306	47.1667	3584	66.6574	6486	18.6093	8615	10.5049	4332	62.7886
A5T	2774	3.96539	2866	6.0014	835	18.8024	1388	19.3804	1516	9.96042	1094	14.351	805	22.9814	1872	11.2714	3062	7.08687	976	21.3115
G6A	7634	55.6196	9899	74.9369	6423	81.177	9012	78.4288	8019	79.586	7523	76.1133	7229	84.161	8698	73.948	11317	74.5074	7905	81.9102
G6C	8294	57.198	9926	72.8289	7143	82.3884	10193	80.2512	8419	77.6458	8178	76.4123	7914	83.5481	9498	71.9309	11656	72.4949	9379	82.5568
G6T	8856	61.1676	11035	77.9248	7509	83.9925	10551	81.0729	9078	82.6063	8391	79.8951	8446	85.9578	9834	76.266	12379	79.0128	8922	83.1428
C7A	15540	77.1493	18314	85.6667	13256	89.3784	17788	87.8738	15287	88.5785	14221	86.5973	14969	90.801	16644	84.0002	20541	85.2295	16582	90.1098
C7G	10036	75.3587	11852	84.4921	8949	87.6299	11981	86.7206	10336	87.945	9414	84.0132	9937	89.0007	11106	83.3063	13731	85.2669	11252	88.3932
C7T	11518	23.6239	12882	28.5748	12056	86.1812	15392	62.9938	11014	33.7116	12714	75.0826	13528	87.537	12822	41.0778	14728	29.9158	15175	84.7315
C8A	11394	29.0592	12448	38.8898	13931	90.0725	17798	85.268	12143	60.3722	14847	87.324	15451	91.2562	14899	71.6357	14909	47.7899	17929	90.8138
C8G	11870	80.6908	13996	88.661	11317	91.5967	14620	91.751	11763	91.4138	12188	89.9573	12408	93.7782	13428	88.2857	16095	89.2575	14279	92.6746
C8T	10256	16.4977	11283	20.039	12194	86.559	13886	59.8661	9711	29.966	12402	72.9479	13463	86.5483	11282	37.9188	12566	23.0463	15135	84.2418
G9A	12292	5.68663	13516	5.54898	10020	29.0619	13449	6.45401	11107	5.57306	11660	8.41338	10797	35.1487	12736	5.51193	15678	5.77242	12501	13.7909
G9C	10409	6.61927	11207	6.3621	8256	10.9375	10849	6.24021	9120	5.65789	9355	6.17851	9114	12.6728	10404	5.54594	13101	6.13694	10356	7.59946
G9T	8933	3.05608	9326	3.97813	5392	7.73368	9416	4.41801	7882	3.52702	7617	4.26677	5198	9.81147	9051	3.70125	10970	5.12306	8125	5.23077
G10A	12747	6.93497	13404	7.64697	11730	52.6854	13646	12.3626	10796	8.21601	11801	18.2357	13671	61.305	12544	9.00032	15522	7.62788	13809	31.2984
G10C	7206	9.6725	8368	8.2457	6838	37.043	8154	9.32058	6945	7.91937	7009	11.3854	8187	45.9753	7686	8.07963	9929	7.52342	7582	18.1614
G10T	8900	4.35955	10183	4.12452	6996	19.6541	10388	5.94917	8626	4.18502	8704	6.54871	7113	24.2654	10200	4.01961	12273	4.88878	9047	9.70487
A11C	3849	12.8605	4463	10.6207	3329	28.3869	4538	10.4231	3798	11.7167	3696	13.934	3972	29.0282	4219	11.0453	5344	10.1422	4092	16.4956
A11G	6296	12.9765	6860	17.07	8125	84.6769	9558	66.7294	6473	32.7978	8403	74.9137	8795	84.5026	7808	45.3253	7943	22.2334	10308	83.6341
A11T	6922	3.22161	7550	3.52318	4533	15.5747	7743	5.14013	6656	3.78606	6198	5.51791	4772	16.2196	7416	3.89698	8996	4.96888	6348	7.62445
A12C	5998	5.7019	6826	6.19689	4800	14.2083	6715	6.62695	5486	5.74189	5598	7.57413	5133	15.527	6234	5.14918	7882	6.81299	6151	8.99041
A12G	7571	4.54365	7879	6.99327	5354	54.8188	7982	18.6044	6829	7.62923	6486	26.4261	6022	57.2069	7611	10.9447	9323	6.50005	6865	42.0976
A12T	8133	4.86905	8452	5.46616	6099	6.95196	8903	5.8295	7220	5.15235	7275	5.55326	6722	6.63493	7886	4.98352	9826	6.68634	7958	5.52903
G13A	8448	15.0805	8741	25.2031	6180	69.5793	8231	67.8046	6312	55.4975	6992	65.861	6993	71.0568	7826	58.7529	9851	36.7678	7806	73.6229
G13C	8288	3.94546	8687	4.35133	3805	39.5269	7411	15.9088	6852	7.20957	5389	20.6717	4065	42.0172	7744	8.25155	9936	5.80717	5162	34.1922
G13T	9510	4.75289	9788	6.67143	4078	48.1854	6899	31.0045	7060	14.1501	5383	35.8722	4613	52.7206	7959	18.0676	11002	9.6437	5379	49.1541
C14A	6268	6.23803	6845	4.9233	5215	3.73921	6758	6.46641	5477	5.16706	5315	5.23048	5948	4.53934	6424	4.54545	7785	7.27039	6157	4.71009
C14G	5881	5.39024	6125	4.8	4830	4.34783	6382	5.57819	5166	4.20054	5062	4.60292	5561	3.45262	6131	4.11026	7225	6.58824	5756	4.48228
C14T	8433	2.76296	9170	3.15158	6411	5.55296	9364	3.85519	7603	3.28818	7788	3.698	7033	7.152	8664	2.83934	10665	3.63807	8386	4.51944
G15A	6322	7.71908	7746	7.33282	5525	7.40271	7910	7.92668	6496	6.58867	6291	7.04181	6053	7.20304	7211	6.87838	9641	8.32901	6924	6.88908
G15C	8775	5.16239	9751	5.78402	6368	12.2959	9863	5.88056	8142	5.41636	7966	6.50264	6969	20.9069	9196	5.18704	11468	5.63307	8847	9.40432
G15T	10462	3.8138	10817	5.17704	7286	7.49382	11176	4.59019	9475	4.61214	9131	5.03778	7831	12.0547	10428	4.47833	13255	4.41343	9925	5.74307
G16A	3583	2.17695	3924	3.5423	3641	3.15847	4099	3.1959	3216	3.10945	3475	3.51079	4341	3.80097	4161	3.31651	4602	4.01999	4137	4.23012
G16C	5225	6.92823	5876	9.73451	4453	10.4199	5648	9.36615	4771	10.1446	4974	9.16767	5256	13.1849	5742	7.34936	6294	9.26279	5979	8.96471
G16T	5031	3.20016	5203	4.80492	4183	5.88095	5326	5.2009	4259	4.71942	4468	5.84154	4877	7.56613	5249	4.49609	5968	5.22788	5238	6.79649
G17A	9121	5.3174	9730	7.82117	6873	11.5525	10448	8.40352	8166	7.8986	7921	8.21866	7597	20.1922	9971	6.62922	11699	7.71861	9201	10.3576
G17C	8392	17.6954	9399	21.9385	6329	32.7224	9235	23.5517	7949	22.506	7484	25.2672	7608	45.8333	8956	17.8205	10853	20.0682	8453	28.7945
G17T	4448	5.17086	4859	8.66433	3854	15.9315	4937	10.9378	3900	7.94872	3997	11.8589	4405	23.9274	4782	7.50732	5545	8.56628	4589	12.6389
A18C	7202	7.63677	7386	8.08286	5635	9.92014	7736	6.57963	6189	6.98013	6584	8.30802	6279	11.9287	7204	7.23209	8792	7.37034	7412	8.98543
A18G	8875	8.72113	9105	7.85283	6942	9.29127	9148	7.01793	7440	6.63978	7946	7.84042	7896	9.54914	8549	7.3108	10040	7.31076	9087	7.94542
A18T	5222	7.75565	4108	7.69231	3882	8.78413	4581	6.4833	3636	7.20572	4159	7.40563	4099	7.58722	4567	6.83162	5229	6.75081	4962	7.17453
C19A	9367	10.5904	9757	11.2125	7182	12.949	10034	9.84652	7986	10.0801	7930	10.8197	8575	19.242	9129	9.20145	11187	9.57361	8929	11.4011
C19G	5848	9.98632	6294	9.97776	4261	9.92725	6156	8.96686	5170	10	5245	8.90372	4829	11.2239	5756	8.87769	7257	9.30136	5872	9.91144
C19T	6856	3.66103	6859	3.87812	5483	7.07642	7216	4.58703	5975	4.3682	6053	4.42756	5908	10.6127	7267	3.81175	7725	4.18123	6845	5.8729
G20A	11260	14.2185	12052	16.1716	8935	28.3604	12023	17.7743	9975	16.6216	10274	20.1771	10771	37.5453	11306	13.6388	13445	13.8044	11225	23.6704
G20C	5483	11.3442	5315	12.6811	4820	14.4813	5754	11.5919	4472	12.4776	4620	12.9437	5818	18.374	5431	10.2744	6351	11.1164	5545	13.8323
G20T	11196	13.6299	11746	14.1154	8446	16.8245	11982	13.2616	9883	13.9634	10061	14.4817	10123	22.5032	11200	12.3661	13601	12.9255	11336	16.4255
A21C	7551	7.64137	8056	7.06306	6198	10.1807	8216	6.86465	6618	6.87519	7196	7.7821	6738	9.6171	7700	6.55844	9353	7.22763	7847	8.44909
A21G	7555	9.84778	8175	11.5963	8155	76.8976	8885	33.3708	6856	16.0589	7829	46.7876	8606	78.3988	8043	20.3034	9316	12.8381	9578	65.473
A21T	7645	8.37148	7671	8.34311	6307	15.3956	7902	7.87142	6229	7.60957	6841	9.42845	6878	14.8735	7301	7.56061	8958	7.27841	8070	11.4622
C22A	9887	6.26075	10775	7.29466	7786	13.2674	10727	7.03831	8891	6.79339	8924	7.96728	9308	19.8861	10391	6.13031	12768	6.72776	10089	9.25761
C22G	5605	4.53167	6024	4.58167	4249	4.3069	5983	4.46264	4879	4.1197	4908	4.36023	4888	5.54419	5820	4.14089	7109	4.5576	5545	4.11181
C22T	4439	8.53796	5070	9.0927	3903	10.0948	5320	8.47744	4191	8.6137	4212	8.85565	4651	13.3735	4825	8.06218	5915	8.08115	4822	9.10411
C23A	6041	2.66512	7078	3.68748	5358	3.30347	7272	3.5066	5904	2.94715	5786	3.43934	6151	3.788	6768	2.92553	8175	3.59633	6660	3.36336
C23G	2667	6.4117	2471	12.1004	2557	7.74345	2770	10.3971	2057	10.2577	2303	9.68302	2805	8.41355	2786	8.97344	3120	14.8397	2693	11.9198
C23T	6374	3.79667	7532	4.67339	5619	6.76277	7774	4.16774	6202	3.77298	6213	5.4724	6441	7.2349	7011	4.47868	8932	4.54545	6951	5.98475
C24A	7125	5.33333	8455	7.7469	6278	6.83339	8471	7.27187	6730	6.06241	6746	6.68544	7291	8.86024	8160	5.93137	9984	7.35176	7699	8.2738
C24G	7784	11.8834	9045	15.1465	6302	16.3281	9116	12.8785	7374	12.9102	7153	14.2178	7454	22.8065	8298	11.1232	10303	12.7342	8199	14.3188
C24T	8498	11.7086	9892	15.3053	7382	34.8009	9911	16.8802	7860	13.8295	8150	20.2086	8464	39.0477	9191	12.5666	11220	12.7362	8648	23.994
G25A	7559	2.83106	8967	2.87722	5666	4.25344	9013	3.41729	7486	2.5915	7347	3.42997	6284	6.06302	8257	2.71285	10324	3.37079	7954	3.46995
G25C	9272	7.98102	10777	7.87789	7849	10.8549	11007	7.42255	8955	7.34785	9081	7.80751	8985	14.1458	10332	7.14286	12877	7.6493	9862	8.77104
G25T	9435	5.05564	11156	5.05558	7567	7.70451	11021	5.92505	9132	5.15769	9263	6.08874	8079	13.1204	10296	5.13792	13300	6.2406	10033	6.80754
T26A	11351	9.22386	12256	9.05679	11369	56.5397	12917	14.7325	10145	9.67965	11193	22.2818	13246	60.4258	11671	10.5732	14388	8.75035	13650	39.4286
T26C	7687	9.97788	8002	10.3474	8251	79.2874	9053	33.4696	6553	12.2539	7821	52.5764	9138	80.4443	7793	16.0657	8910	11.6162	10132	73.0951
T26G	8811	9.21575	9891	8.92731	8596	49.43	10300	12.7476	7848	9.07238	8513	18.4659	10105	52.9243	9261	9.81535	11340	8.35097	10408	31.8313
T27A	9958	8.68648	10997	8.91152	10068	54.2114	11046	13.5343	9032	9.1674	9662	20.4409	11443	58.6734	10316	10.7794	12149	8.73323	11921	36.1127
T27C	7259	10.4698	7863	11.5223	8431	76.6101	8860	34.7178	6610	15.7186	8019	51.4777	9252	78.2534	7787	19.2243	8510	12.2679	10439	71.2425
T27G	8336	7.70154	8923	7.73283	7168	17.1875	9013	6.90114	7296	7.08607	7867	9.22842	7762	16.4004	8524	6.9451	10081	7.14215	8793	11.5888
T28A	10170	8.36775	11284	7.87841	9801	51.3315	11552	11.9373	8883	8.08285	9539	17.853	11378	57.0135	10429	8.91744	12714	7.48781	11720	31.8003
T28C	7901	7.59398	8799	7.67133	7707	42.0138	8953	9.48285	7138	7.0608	7480	15.0668	8270	45.1995	8370	8.1362	10002	6.74865	8758	26.6271
T28G	8927	8.59191	9113	7.12169	6855	15.8279	9482	7.01329	7457	7.56336	7504	8.66205	7544	16.3176	8695	7.11903	10591	7.18535	8811	11.1565
T29A	9633	8.41898	10313	8.27111	9216	47.6454	10214	10.9653	8232	8.16327	8950	16.8268	10387	53.153	9421	8.77826	11510	8.04518	10764	28.0844
T29C	7253	13.3876	7890	14.6895	8409	78.6063	9258	48.1529	6810	24.743	8233	59.0186	9534	78.0155	8271	31.0482	8830	17.3386	10626	73.1978
T29G	8017	7.40926	8331	6.73389	6753	19.6209	8508	7.01693	6871	6.37462	7234	9.80094	7294	19.043	7942	6.42156	9703	6.23518	8525	12.9971
C30A	9543	7.07325	10358	7.6173	8438	38.9903	10465	8.83899	8212	7.33074	8475	12.9676	9184	45.024	9614	7.74912	11876	7.69619	10057	21.8554
C30G	7670	3.76793	8092	3.96688	5695	15.8911	8489	5.08894	6734	3.7125	6731	6.25464	6295	16.7593	7709	4.35854	9609	4.29805	7470	9.63855
C30T	10635	8.96098	11030	9.54669	10288	58.0871	11974	13.7548	9294	9.24252	10211	21.9077	11649	62.1684	10794	10.3761	13189	8.74972	11975	38.9979
C31A	8115	3.2902	9084	3.97402	5089	25.4077	9083	5.747	7385	3.8998	7370	8.24966	5428	29.9374	8413	4.95661	10623	5.57281	7280	16.4423
C31G	6963	6.67816	7587	6.44524	6788	47.4072	8013	11.3565	6140	7.11726	6555	17.4523	7238	51.1605	7102	8.20896	8509	7.97979	7799	28.1703
C31T	9195	7.21044	9895	7.71097	8788	54.6541	10752	11.9048	8403	7.94954	8766	20.4883	9502	59.6296	9570	8.64159	11607	7.94348	10258	34.6851
C32A	9217	8.65791	9844	9.96546	9974	76.0578	10877	24.915	8259	10.873	9580	41.263	11309	77.6992	9666	13.2423	11455	10.825	12007	65.8949
C32G	6694	10.726	7305	14.0178	4599	75.9078	6754	50.1777	6070	18.089	5283	62.2374	4712	79.2657	6551	29.5833	8443	15.954	5927	75.89
C32T	9569	9.13366	9021	11.6617	10157	77.2571	11166	26.4374	8365	11.2851	10162	40.3267	11554	78.6567	10222	13.5883	12282	10.7312	12216	64.6202
T33A	9877	10.3371	10985	10.0683	11244	76.2184	11811	24.5195	8919	12.2772	10590	40.8593	12990	79.3226	10220	15.3523	12204	10.7342	13569	63.3577
T33C	9067	9.09893	10177	9.73764	10330	69.5063	10762	25.6179	8125	13.4646	9591	37.3996	11482	73.9679	9526	16.3657	11179	10.6181	11923	55.3216
T33G	8332	9.79357	8924	9.28956	7029	19.889	9151	10.2721	7138	9.35836	7155	13.1237	7960	19.2211	8303	8.7077	10049	8.4685	8901	16.0544
C34A	10120	9.8913	11042	10.0888	10754	75.5254	11644	25.0687	8804	11.313	10216	38.8704	12369	79.295	10315	14.6389	12278	10.2378	13239	62.3385
C34G	10888	10.1488	11979	11.7539	12531	76.618	13229	33.7214	9774	17.0964	11682	47.4234	14359	80.4374	11696	20.3745	13988	12.3248	15152	67.4828
C34T	14287	9.01519	16543	8.85571	16239	72.3875	15851	22.743	12864	10.3933	15648	36.7843	17867	76.0004	15226	13.7068	17046	9.63276	19271	59.2445
T35A	9152	9.30944	8315	11.5454	10234	74.8974	10522	26.2117	8280	12.8019	9565	39.4773	11256	77.834	9849	15.6869	11452	10.3475	12033	60.841
T35C	7855	9.25525	7179	12.1465	9838	76.9974	9527	30.7652	7046	13.2841	8748	45.8848	11110	78.4788	8321	18.7477	9647	10.6976	11445	66.0288
T35G	7960	7.48744	8375	8.1194	8425	61.3294	9028	17.4014	6976	7.8555	7772	26.8914	9385	61.4811	8180	9.84108	9630	7.60125	9638	45.829
T36A	8510	8.07286	8783	9.14266	8538	71.2813	9870	23.4752	7519	11.3978	8500	36.5294	9563	73.3034	8929	14.0777	10474	10.0821	10437	56.7883
T36C	7025	3.55872	7478	4.84087	5102	23.187	7483	7.1629	6050	4.64463	6134	10.7434	6224	22.4936	7039	4.9723	8380	4.57041	6662	17.187
T36G	8595	11.3322	9421	12.4615	10058	80.8511	11435	58.8194	7859	22.102	10468	68.4276	11153	81.0455	9664	35.6064	10772	12.941	12675	79.3688
T37A	8567	6.78184	9483	7.31836	8145	68.4715	9631	21.6281	7794	9.52014	8339	34.0448	8680	71.0829	8843	11.7833	10573	7.72723	9989	54.2497
T37C	7572	9.83888	8112	9.86193	7476	64.3392	8423	18.1883	6435	11.5618	7045	26.8701	8687	69.0457	7427	12.4546	9310	9.69925	8729	43.934
T37G	8512	7.76551	9459	8.57385	10080	80.9821	11212	49.117	7591	14.807	10265	63.5558	10858	81.1199	9295	24.2388	10503	9.04503	12006	76.5451
C38A	9650	6.6943	10711	6.90879	8616	65.889	11073	19.4076	8518	9.76755	8953	31.6765	9391	68.3633	9779	11.1463	11948	7.7084	10706	52.7274
C38G	9045	6.45661	9945	6.91805	9195	67.95	10793	21.1897	8279	9.25233	9061	35.1065	10186	70.8129	9423	11.8434	11505	7.28379	11070	54.3812
C38T	9152	6.09703	9851	7.01452	7739	65.0213	10092	19.3916	8005	9.04435	8412	31.1935	8342	67.7775	9261	11.0463	11193	7.91566	9497	50.3106
A39C	9066	8.95654	10005	9.74513	9410	71.8066	10616	28.2121	8219	13.8946	9475	41.7309	10019	72.6619	9947	19.2018	11434	11.2646	11064	58.5503
A39G	9790	8.93769	10507	9.64119	9563	66.6214	11010	21.3715	8485	11.0194	9544	32.9631	10061	67.3591	9960	13.3936	12040	10.2326	11569	52.7963
A39T	9887	7.23172	10908	7.49908	9274	58.141	11047	14.909	8966	8.49877	9291	22.6886	10729	61.9163	10129	9.71468	12284	7.08238	11150	41.2646
T40A	9483	6.70674	10365	7.46744	9019	66.5373	10750	19.8698	8656	9.2537	9261	31.2061	9874	68.3614	9952	12.4096	11759	7.6367	10889	52.6495
T40C	8378	6.83934	9039	6.68216	8146	71.2006	9583	24.9504	7399	9.25801	8072	38.33	8568	71.7904	8385	12.4866	10214	7.74427	9602	57.1235
T40G	7890	6.03295	8720	7.1445	7416	60.1268	8853	13.8597	6839	7.34025	7571	24.5542	8092	60.6525	7992	8.84635	9590	7.79979	8984	43.2435
T41A	8975	8.25627	9981	8.06532	9956	72.1876	10827	24.1988	8152	10.9544	9256	36.7761	11077	75.4717	9532	14.0264	11520	8.20312	11534	56.3291
T41C	7340	8.14714	7782	9.04652	7016	66.2343	8453	21.4007	6497	11.5284	7189	32.6054	7880	70.2538	7530	13.1873	8999	9.53439	8610	51.324
T41G	7934	6.42803	8462	6.16875	6915	41.9957	8499	8.68337	6831	5.84102	7085	13.7756	7592	40.8851	7689	6.60684	9245	6.55489	8453	24.9852
G42A	9960	7.66064	10575	7.87707	9390	66.688	11170	18.872	8686	10.0161	9663	30.6737	10511	69.7745	10219	11.6156	12098	8.28236	11602	50.2069
G42C	9560	6.85146	9640	8.6722	9422	67.2044	10912	21.4993	8512	10.3031	9393	33.6847	10460	69.0249	9987	12.1959	11924	8.5374	10917	53.0182
G42T	11551	7.35001	12638	8.17376	10281	69.7306	12787	21.9051	10446	10.2719	11123	34.9366	11253	71.5276	11790	13.1467	14211	9.80227	12837	56.3527
C43A	10622	6.61834	11471	6.25926	10142	44.5869	11756	9.63763	9223	6.40789	9688	14.8534	11215	47.276	10844	7.21136	12626	6.20149	11426	25.9758
C43G	8551	6.18641	8816	5.41062	6778	17.7486	8875	5.76901	7068	5.61686	7406	7.85849	7407	20.3186	8299	5.96457	9833	5.80698	8244	9.94663
C43T	10551	7.02303	11478	7.09183	9356	67.8495	11651	21.0111	9236	9.5929	9584	32.9821	10108	68.6882	10714	11.6856	12816	8.55961	11284	54.0411
G44A	11454	4.46132	13020	4.43932	9184	12.3476	12648	5.63725	10352	4.32767	10533	5.90525	9757	17.6079	11554	5.03722	14306	5.2146	11607	7.86594
G44C	10494	8.09034	11192	8.57756	10848	64.2976	11823	22.9891	9265	10.8149	10651	33.8841	12213	69.9419	10882	13.628	12769	8.37967	12624	48.9306
G44T	11838	5.4739	13001	5.27652	9888	43.4264	12974	11.708	10209	6.81751	10970	17.3017	11297	53.5186	11786	7.8992	14284	5.52366	12290	28.8202
C45A	10005	4.87756	10875	4.75402	8065	7.45195	10879	5.04642	8733	4.55743	9059	5.94988	8860	10.3499	10288	4.67535	12092	5.01985	9988	6.06728
C45G	7854	3.76878	8646	3.70113	6129	11.6659	8512	4.19408	6904	3.2445	7044	5.19591	6806	20.0118	8069	3.76751	9501	3.47332	7819	6.68883
C45T	10201	3.57808	11101	4.67525	7566	51.3878	11047	17.498	8760	7.54566	8743	23.8591	8567	56.9161	10226	9.80833	12322	5.06411	9525	38.6982
G46A	9381	18.4096	10562	26.6711	8547	79.1155	10995	75.2433	8820	59.1383	9484	75.2847	9443	78.9897	10505	65.0833	12138	37.4197	10961	80.9233
G46C	11781	8.7344	12446	8.92656	10605	45.1579	12472	11.4096	10185	8.96416	10709	17.2285	12120	53.3911	11524	9.97917	13994	8.21066	12482	25.693
G46T	11221	13.1361	9611	18.5829	8802	39.8205	11372	19.9085	8899	16.1816	9050	23.989	9917	43.8338	10445	13.1833	12523	13.3115	9935	28.3342
G47A	10819	16.3139	11763	17.2745	11064	59.3547	12523	29.6095	9502	20.5641	10499	34.0413	13428	71.1275	11054	20.2913	13110	15.8047	12395	43.7515
G47C	9401	13.7858	9145	15.8994	8014	35.2383	9966	16.9978	7654	14.5414	9282	19.0045	10116	45.9866	9364	13.3063	11625	12.6624	10323	24.6924
G47T	11688	15.7512	12321	16.3623	10586	41.6116	12592	20.521	10124	16.0016	10992	23.881	12465	52.7236	11844	15.4931	14171	14.7414	12530	28.4996
G48A	11032	7.33321	11821	8.34955	9121	15.0532	11946	8.47983	9446	7.48465	9760	10.2664	10273	21.5127	10791	6.19961	13327	7.03834	11050	11.4842
G48C	9457	18.9701	10201	23.5761	7373	24.5762	10282	21.2507	8202	22.397	8661	21.8797	8229	34.2326	9423	18.423	11733	22.0148	9377	24.7094
G48T	11997	13.145	12603	14.7505	10015	27.339	13123	16.1625	10719	14.1245	11257	18.735	11651	41.0866	12033	12.5987	14826	13.1593	12915	22.0674
G49A	12127	7.14934	12475	6.59719	9306	10.7028	12737	6.1553	9853	5.92713	10277	7.19081	10546	16.1009	11776	6.15659	14151	6.22571	11618	7.7466
G49C	10469	4.17423	11209	5.2101	8266	5.94	11117	4.12881	9116	4.39886	9475	4.67546	8812	8.90831	10261	4.27834	12885	5.22313	9978	4.78052
G49T	11607	5.49668	12257	5.77629	9273	6.74	12638	5.66545	10495	5.01191	10705	5.14713	10171	6.62668	11547	5.20482	14614	5.89845	11566	6.17327
A50C	8065	5.96404	7854	6.76089	6402	10.0281	8682	6.3695	7208	5.68812	7430	6.6891	6935	11.6799	8105	6.05799	10294	6.37264	8329	7.33581
A50G	8116	6.45638	8796	7.23056	6050	22.7273	8780	8.92938	7092	7.1066	7232	10.6056	6794	37.3271	8324	6.10284	10108	6.80649	7947	15.0371
A50T	8628	8.1363	8662	8.63542	6885	9.54248	9429	7.56178	7544	7.19777	8048	7.6168	7650	8.57516	8938	6.80242	10967	7.07577	9332	7.87613
C51A	9419	6.96465	10277	8.55308	7351	14.2294	10551	8.34044	8375	7.1403	8450	8.76923	8653	26.1297	9854	6.9312	11686	7.41913	9448	10.2456
C51G	8637	7.72259	8621	7.95731	6768	8.0526	9001	8.19909	7315	7.5188	7640	7.74869	7374	13.1408	8576	7.28778	10453	6.87841	8677	7.89443
C51T	8757	7.83373	9073	10.2722	6828	25.9959	9689	10.5584	7877	9.36905	7684	12.2202	7936	41.8599	8929	8.3548	10800	8.90741	8843	17.6185
G52A	9192	8.61619	9619	10.001	7239	22.365	9973	14.4089	7858	11.0333	7931	15.7609	8192	34.4849	9501	9.64109	11184	9.96066	8834	19.957
G52C	9469	6.34703	9891	7.15802	7233	15.1251	9900	8.35354	7973	6.57218	7969	9.64989	8306	24.4883	9331	6.16225	10903	6.18178	9065	12.4655
G52T	9036	9.30722	9260	11.0259	6907	11.7417	9494	10.9438	7743	9.86698	7897	11.1181	8017	17.1136	9071	9.88866	10581	9.26188	8908	11.7872
A53C	9233	6.96415	9377	6.86787	7009	12.7836	9594	7.18157	7644	6.71115	8104	8.21816	7868	15.1373	8762	6.63091	10713	6.6928	9054	9.28871
A53G	7961	6.69514	8595	6.32926	6865	35.1639	8629	7.27778	6757	6.68936	7512	12.2338	7494	34.1607	7997	7.25272	9822	6.75015	8457	20.3027
A53T	8927	8.5471	8478	8.26846	6904	9.719	9483	7.53981	7408	7.74838	8219	8.52902	7695	7.44639	8891	7.01833	10751	7.26444	9123	8.49501
C54A	10674	15.4488	11441	15.9951	8421	19.3326	10975	14.3508	8955	14.8632	9387	14.9675	9649	25.3187	10479	12.8257	12597	13.5985	10880	17.2978
C54G	9971	7.35132	10748	6.47562	7290	6.31001	9260	6.10151	7442	7.00081	8934	6.31296	8480	7.20519	9579	5.27195	11714	6.38552	9502	5.8935
C54T	9916	8.09802	10113	7.91061	7738	7.22409	10172	7.03893	8300	6.50602	9177	6.32015	8417	6.11857	9644	6.21112	12007	6.77938	9908	6.17683
C55A	7528	6.49575	8610	6.91057	6461	19.7957	8526	9.20713	6655	7.4831	6841	11.8404	7498	29.1811	7779	6.29901	9454	6.84366	8042	14.2129
C55G	3878	20.3713	4344	24.4015	3953	24.4624	4408	23.2759	3478	24.1518	3647	24.1568	5110	32.2701	3852	18.3281	4756	21.8461	4440	25.3604
C55T	8750	7.65714	9644	7.6628	8347	56.6431	9777	18.5844	7418	9.96225	8491	26.8284	9884	62.0093	8877	11.4002	10538	7.59157	10211	38.958
C56A	8823	6.18837	9601	6.10353	7511	22.527	9797	7.46147	7687	6.45245	7998	10.04	8795	36.9073	9176	5.983	11019	5.62664	9326	12.5348
C56G	7233	3.01396	7658	3.79995	5402	8.14513	7679	3.71142	6075	3.98354	6203	4.15928	6276	18.0848	7282	3.19967	8905	3.52611	7031	5.36197
C56T	9824	7.68526	10752	7.69159	8968	35.1249	10580	10.293	8436	7.47985	9272	13.5893	10359	47.2439	10233	8.79507	11978	6.82919	10402	20.3519
T57A	9016	4.46983	9197	4.67544	7295	29.7053	10164	9.46478	8186	5.60713	8859	12.2587	8328	36.011	9682	6.1351	11763	4.92221	9580	19.4676
T57C	10021	7.53418	11075	8	6778	71.6731	10075	27.9901	8779	8.63424	8106	45.4355	7312	71.1023	9688	12.18	12173	8.18204	8743	65.7555
T57G	8298	4.89275	9263	4.93361	6555	17.849	9422	7.20654	7564	5.16922	7772	8.56922	6911	27.1741	8727	5.50017	10663	5.33621	8247	11.8831
G58A	7971	12.1315	8436	12.5415	9548	74.9476	9598	39.5916	6577	19.2793	8726	50.5501	10986	75.4324	8634	23.4306	9638	13.0733	11142	66.0833
G58C	7789	8.46065	8578	9.15132	7774	68.5104	9186	30.6445	6886	14.7691	7618	38.8685	9254	74.1625	8167	18.4156	9618	9.99168	9145	54.5763
G58T	10313	10.0068	11888	9.27826	10507	57.8662	12005	19.6085	9520	11.9643	10080	27.0337	12502	67.5652	10788	13.5243	12907	9.42899	12396	40.3598
C59A	9259	10.8435	9569	12.4255	10481	75.7275	10591	33.3113	7608	17.0741	9230	48.5049	11746	79.2695	8974	17.7067	10225	11.7848	10676	62.3361
C59G	6402	4.68604	6843	7.02908	5203	60.0423	6768	26.1082	5322	9.8835	5395	38.1279	5810	59.4492	6423	11.3654	7324	7.1136	6222	54.5644
C59T	9911	9.4945	10673	11.9741	11567	77.9286	11746	39.2985	8500	17.6588	10286	53.3832	12629	80.5606	9950	22.5126	11270	12.2981	12132	66.9964
A60C	9212	6.70864	10077	6.61903	8642	56.723	10289	15.2493	8231	7.5811	8822	23.9628	9758	62.2669	9221	9.34823	11117	6.67446	10341	38.2942
A60G	8080	6.60891	8650	7.21387	6438	63.8708	8714	22.6532	7210	10.0832	7170	35.8298	7367	64.1645	8256	13.7597	9748	8.27862	8059	55.1433
A60T	9663	7.21308	10582	7.06861	8087	23.2348	10133	8.27988	8081	7.15258	8838	10.8735	8902	24.2305	9263	7.6649	11145	6.89098	9901	15.8166
G61A	10631	5.99191	11759	7.06693	8996	68.2748	11541	29.6508	9405	14.992	9986	42.3092	9994	69.6318	10675	18.1358	13052	9.18633	11053	59.9928
G61C	10468	6.6966	11365	7.62868	11393	73.3169	12019	30.2188	9302	14.0937	10586	42.7262	12557	73.5606	10635	17.6963	12326	9.4759	13165	61.7319
G61T	11455	7.36796	12716	8.79994	12686	77.8732	13635	31.6172	10241	15.6137	11990	45.5046	13835	78.7785	11832	19.1346	13828	11.6647	14641	65.8562
A62C	7471	10.4136	8138	11.4279	9608	84.6586	10194	57.6516	7074	26.4348	9567	68.4541	10133	85.4535	8642	36.9706	9259	14.9044	11787	80.5379
A62G	7160	12.9469	7978	14.4397	6889	68.2973	8457	33.2387	6263	21.4434	7250	41.9862	7848	70.5275	7576	22.7297	8931	15.6533	8590	57.5786
A62T	9104	6.92004	9533	7.4583	8121	50.3879	10201	14.2339	8275	9.38973	8302	18.9352	9702	55.4834	9247	10.3817	10955	8.52579	9984	32.8325
G63A	12432	7.67375	13174	7.36299	10786	49.3788	13504	9.50829	10853	7.2146	11305	15.4268	12576	54.1031	12051	8.13211	14746	6.71369	13269	28.1634
G63C	10153	7.78095	10964	7.28749	10300	56.8155	11291	11.7793	8683	7.58954	9769	19.5005	11491	60.5865	10357	8.45805	12235	7.3396	11991	37.5865
G63T	11048	8.58979	12178	8.03909	14248	80.9938	12154	28.0731	9266	10.2633	12930	43.4648	17202	86.0423	12115	12.1172	14399	7.49358	16674	67.0625
A64C	7608	7.71556	7630	7.8768	7913	56.1607	8399	11.7633	6613	6.62332	7514	19.8163	8906	62.9126	7492	7.80833	8899	6.58501	8970	35.5853
A64G	7239	11.7143	7917	13.3763	8507	82.6378	9096	46.1522	6818	20.9299	8290	58.3836	9446	84.0356	7925	29.9306	8905	15.3846	10242	75.4638
A64T	8731	7.94869	9297	7.1636	9662	72.6972	9876	19.9068	7458	8.98364	8689	32.7886	10907	78.7293	8864	12.4549	10489	7.5317	10820	56.9409
G65A	11308	8.87867	12179	9.9105	14990	91.0941	18180	83.4983	10719	33.5666	15352	85.8911	16817	92.7454	14706	60.1795	13761	14.4466	18386	90.7647
G65C	6650	5.45865	6413	7.37564	8783	85.2101	11285	77.51	6230	27.1589	9749	80.08	9833	89.6064	8234	49.7085	7434	8.35351	10804	85.9774
G65T	8193	9.22739	9209	12.7484	14136	90.4287	16181	87.1887	9336	55.1949	14036	86.1285	14777	92.2244	13425	70.2048	10257	18.8944	16090	90.2362
G66A	7819	11.3825	8575	24.6414	8147	84.3378	10346	79.2867	7786	71.0249	8559	80.6519	8651	88.7412	9115	72.9128	10324	37.1368	9388	84.6932
G66C	7549	13.5117	7961	20.5502	10746	90.3871	14311	89.3928	10023	76.6038	11608	88.4907	12165	92.9881	12616	82.6807	10726	35.6983	13015	90.7184
G66T	8388	34.1798	10329	55.1457	8771	88.3594	11137	86.5853	8695	84.6578	9471	85.6193	9155	91.1633	10687	81.2576	11792	69.8779	10351	89.2861
C67A	3525	14.8652	3920	24.4643	1782	54.7699	2629	51.6927	2160	47.4074	2164	47.1349	1901	60.5997	2694	45.2858	4075	29.816	2232	58.1541
C67G	2783	4.49156	3203	5.74461	1224	37.4183	2019	30.4111	2253	11.2739	1532	29.8956	1356	41.2979	2499	14.6459	3647	7.78722	1783	43.8587
C67T	4765	7.32424	5666	10.9778	2055	52.8954	3047	47.1611	3389	22.0124	2448	46.8546	2059	59.3492	3510	31.6239	5891	15.9396	2540	54.1339
T68A	3573	17.3524	3682	31.3688	2118	63.6922	2743	57.0179	2232	53.8082	2229	56.2135	1947	66.4612	2789	47.6873	4084	39.4711	2460	64.1463
T68C	3581	12.2591	3804	21.5563	1939	62.2486	2894	56.0815	2431	44.2205	2352	53.9116	1958	65.7303	2998	44.9633	4201	29.9214	2407	65.8496
T68G	2632	4.02736	2937	5.61798	1253	28.332	2199	22.7831	2340	8.11966	1661	22.0349	1262	29.0016	2608	9.2408	3534	6.05546	1504	33.5771
G69A	8231	52.0228	10727	68.7984	8506	85.9628	9742	79.1521	8287	76.9157	8604	77.8708	9257	87.3933	9666	72.4498	11094	68.5866	8988	83.0218
G69C	4976	46.0008	6582	69.2191	5130	83.1384	6434	81.2869	5216	79.7354	5281	79.7576	5318	86.7995	6245	74.7158	7172	67.7914	5667	84.8068
G69T	7273	64.3063	9756	80.3403	7445	88.3546	8743	84.113	7676	85.3439	7785	83.4554	7733	89.7323	8405	80.6187	9911	77.187	7561	87.1313
A70C	4475	23.8436	5219	40.41	6779	88.7299	7780	84.5116	5375	67.1628	7285	85.6692	6948	90.5009	7286	77.7244	6204	46.8085	7682	88.5186
A70G	8101	11.6035	8640	14.3981	9279	86.3024	9863	47.3791	7152	18.9457	9124	64.1933	9872	87.966	8655	27.383	9851	15.0036	10936	79.6909
A70T	8291	20.1182	9132	28.9531	9826	90.1079	10961	71.5993	7705	33.7313	9931	82.1468	10606	91.7028	9290	46.7707	10375	26.8627	10826	87.7609
A71C	8635	18.8303	8916	24.6411	12471	90.2013	12099	65.1624	8187	34.2616	12121	78.2361	13391	92.5846	10171	43.8895	10676	26.3301	14328	88.6935
A71G	8375	13.2537	8746	17.2079	12003	91.2022	12690	70.8038	8074	32.3755	11891	81.1959	12391	92.8254	10747	48.6461	10729	19.5824	13771	89.4634
A71T	8446	11.757	8972	19.0816	12566	90.2037	12098	65.8043	8193	35.4693	11958	78.6837	13209	91.0364	10134	45.3227	10324	19.4401	12576	85.8699
A72C	8333	12.4085	8602	13.9037	11159	80.7241	10388	34.2896	7719	17.7355	9609	48.6003	12489	83.5936	8933	23.2509	10656	13.917	12719	66.4911
A72G	8606	13.3395	8834	14.4782	11390	88.806	11327	56.2108	7927	23.5398	10534	71.0366	11710	91.5371	9853	34.9944	10611	15.8138	12575	82.839
A72T	8866	14.5725	9135	16.1029	11040	85.3623	11191	43.8835	7898	20.5875	10422	62.0514	12188	86.8149	9433	27.16	10813	17.0258	13235	78.8893
T1A;T2A	112	10.7143	141	8.51064	87	60.9195	109	18.3486	92	10.8696	103	34.9515	85	58.8235	120	9.16667	144	9.72222	83	55.4217
T1A;T2C	108	6.48148	98	8.16327	60	68.3333	85	25.8824	75	12	80	42.5	82	60.9756	91	17.5824	94	8.51064	96	55.2083
T1A;T2G	112	4.46429	101	11.8812	79	34.1772	80	6.25	80	12.5	93	10.7527	94	31.9149	99	15.1515	128	4.6875	105	23.8095
T1A;T3A	125	5.6	116	7.75862	50	62	88	39.7727	95	10.5263	61	52.459	47	61.7021	97	19.5876	121	9.91736	62	64.5161
T1A;T3C	63	6.34921	51	5.88235	38	73.6842	59	57.6271	62	38.7097	42	69.0476	46	67.3913	58	20.6897	77	16.8831	51	76.4706
T1A;T3G	80	6.25	109	20.1835	96	79.1667	107	56.0748	74	27.027	84	67.8571	95	85.2632	114	32.4561	106	9.43396	100	70
T1A;C4A	91	5.49451	88	6.81818	32	56.25	55	38.1818	74	9.45946	54	37.037	45	66.6667	66	18.1818	107	11.215	42	50
T1A;C4G	39	23.0769	63	19.0476	43	48.8372	49	36.7347	57	26.3158	44	54.5455	35	37.1429	56	33.9286	71	19.7183	46	50
T1A;C4T	112	5.35714	91	7.69231	44	47.7273	81	24.6914	56	12.5	64	48.4375	49	53.0612	94	25.5319	108	12.963	34	55.8824
T1A;A5C	53	13.2075	35	34.2857	35	60	43	51.1628	35	40	33	51.5152	24	66.6667	39	41.0256	63	26.9841	45	80
T1A;A5G	73	5.47945	85	8.23529	36	58.3333	59	16.9492	68	11.7647	40	32.5	28	57.1429	77	18.1818	93	6.45161	52	57.6923
T1A;A5T	25	0	35	11.4286	9	33.3333	16	12.5	19	10.5263	14	14.2857	9	11.1111	25	20	36	22.2222	11	18.1818
T1A;G6A	121	44.6281	191	74.3455	131	90.8397	163	82.8221	120	80.8333	139	82.7338	131	93.1298	139	78.4173	191	78.534	135	83.7037
T1A;G6C	99	42.4242	119	57.1429	136	85.2941	179	84.9162	110	66.3636	139	88.4892	140	91.4286	132	75.7576	147	51.0204	141	92.1986
T1A;G6T	111	24.3243	123	29.2683	114	82.4561	136	77.2059	121	54.5455	105	82.8571	105	80	123	73.1707	132	37.1212	138	82.6087
T1A;C7A	103	48.5437	135	66.6667	80	77.5	128	77.3438	105	79.0476	81	82.716	112	77.6786	136	74.2647	155	74.8387	108	71.2963
T1A;C7G	65	26.1538	90	53.3333	65	69.2308	77	74.026	76	72.3684	64	56.25	78	75.641	75	65.3333	81	61.7284	54	74.0741
T1A;C7T	142	18.3099	129	31.7829	125	88.8	182	62.0879	122	34.4262	136	75.7353	152	87.5	140	45	210	29.5238	168	81.5476
T1A;C8A	123	23.5772	156	38.4615	198	91.4141	261	84.2912	137	63.5036	205	89.2683	214	85.0467	194	67.5258	185	36.7568	275	91.2727
T1A;C8G	100	65	119	81.5126	87	89.6552	93	87.0968	76	82.8947	97	87.6289	127	86.6142	87	80.4598	124	79.0323	111	78.3784
T1A;C8T	126	15.873	169	18.9349	169	80.4734	169	62.7219	100	29	163	73.6196	191	80.6283	133	25.5639	154	29.2208	181	85.0829
T1A;G9A	147	2.72109	150	3.33333	102	29.4118	153	8.49673	127	6.29921	126	7.93651	128	28.9062	158	5.6962	180	2.77778	145	6.89655
T1A;G9C	152	5.92105	134	2.23881	99	14.1414	126	3.96825	123	4.87805	97	5.15464	97	11.3402	118	11.0169	138	6.52174	140	3.57143
T1A;G9T	78	1.28205	94	3.19149	60	5	112	4.46429	76	2.63158	78	2.5641	57	15.7895	102	4.90196	93	5.37634	77	7.79221
T1A;G10A	164	8.53659	167	7.18563	150	52	174	14.3678	134	6.71642	140	15	136	55.8824	163	8.58896	202	6.43564	159	23.8994
T1A;G10C	122	10.6557	131	12.2137	100	35	106	11.3208	108	5.55556	110	11.8182	112	48.2143	123	5.69106	137	6.56934	125	15.2
T1A;G10T	129	0.775194	111	1.8018	79	13.9241	137	2.91971	111	4.5045	106	5.66038	90	21.1111	111	3.6036	146	4.79452	128	8.59375
T1A;A11C	72	5.55556	82	13.4146	69	23.1884	88	11.3636	66	6.06061	64	6.25	76	21.0526	63	9.52381	107	5.60748	76	9.21053
T1A;A11G	97	8.24742	84	8.33333	90	86.6667	121	56.1983	91	26.3736	90	60	101	81.1881	91	34.0659	90	17.7778	128	78.125
T1A;A11T	86	1.16279	74	2.7027	50	4	65	6.15385	68	0	76	2.63158	55	14.5455	74	4.05405	82	6.09756	69	1.44928
T1A;A12C	78	1.28205	87	9.1954	62	12.9032	77	1.2987	62	6.45161	56	3.57143	43	16.2791	73	2.73973	114	1.75439	73	8.21918
T1A;A12G	91	3.2967	93	5.37634	47	53.1915	85	10.5882	88	4.54545	80	25	73	39.726	88	10.2273	100	8	83	38.5542
T1A;A12T	99	9.09091	83	4.81928	65	3.07692	90	12.2222	83	8.43373	74	5.40541	69	5.7971	90	8.88889	116	6.03448	89	8.98876
T1A;G13A	88	6.81818	102	11.7647	52	44.2308	65	35.3846	68	29.4118	71	52.1127	62	53.2258	78	30.7692	119	21.0084	88	65.9091
T1A;G13C	81	1.23457	80	5	44	20.4545	101	11.8812	73	6.84932	60	15	58	32.7586	82	2.43902	111	6.30631	70	15.7143
T1A;G13T	80	5	110	4.54545	45	35.5556	100	25	87	6.89655	79	32.9114	49	38.7755	91	6.59341	116	6.89655	61	34.4262
T1A;C14A	75	2.66667	76	7.89474	65	3.07692	78	8.97436	78	7.69231	53	9.43396	75	1.33333	86	5.81395	97	6.18557	72	5.55556
T1A;C14G	75	2.66667	79	2.53165	56	3.57143	73	1.36986	72	4.16667	74	2.7027	74	4.05405	59	1.69492	79	6.32911	64	3.125
T1A;C14T	97	3.09278	101	3.9604	65	4.61538	82	3.65854	91	1.0989	71	12.6761	78	5.12821	93	0	106	3.77358	81	4.93827
T1A;G15A	111	1.8018	124	10.4839	89	4.49438	132	5.30303	94	8.51064	116	12.931	123	4.87805	100	11	147	7.48299	121	5.78512
T1A;G15C	105	1.90476	102	6.86275	78	5.12821	131	0	114	8.77193	96	4.16667	86	16.2791	113	5.30973	149	4.69799	127	6.29921
T1A;G15T	130	3.07692	119	5.04202	83	4.81928	132	1.51515	108	3.7037	102	4.90196	80	6.25	135	0.740741	159	9.43396	127	4.72441
T1A;G16A	81	1.23457	80	3.75	55	5.45455	84	3.57143	79	6.32911	65	3.07692	79	2.53165	86	6.97674	84	2.38095	93	4.30108
T1A;G16C	47	10.6383	52	5.76923	47	12.766	44	13.6364	52	13.4615	37	13.5135	45	26.6667	54	12.963	65	23.0769	47	14.8936
T1A;G16T	56	3.57143	76	5.26316	65	4.61538	73	6.84932	47	10.6383	73	4.10959	68	11.7647	72	1.38889	81	3.7037	57	10.5263
T1A;G17A	129	4.65116	130	6.92308	89	3.37079	115	4.34783	100	7	100	7	85	9.41176	110	3.63636	140	3.57143	103	7.76699
T1A;G17C	124	8.87097	117	8.54701	76	14.4737	98	14.2857	96	14.5833	91	10.989	109	24.7706	107	7.47664	113	8.84956	110	8.18182
T1A;G17T	100	4	103	6.79612	70	4.28571	83	6.0241	76	1.31579	103	3.8835	74	9.45946	97	3.09278	132	6.81818	119	10.9244
T1A;A18C	107	5.60748	94	8.51064	68	17.6471	117	6.83761	89	10.1124	82	8.53659	77	11.6883	100	10	106	10.3774	95	8.42105
T1A;A18G	111	15.3153	118	13.5593	85	12.9412	95	4.21053	103	7.76699	97	10.3093	108	3.7037	111	9.00901	125	7.2	111	11.7117
T1A;A18T	67	8.95522	49	6.12245	42	16.6667	71	2.8169	35	17.1429	44	13.6364	62	4.83871	57	8.77193	62	6.45161	54	5.55556
T1A;C19A	122	16.3934	129	10.8527	110	19.0909	121	10.7438	83	20.4819	87	14.9425	100	19	102	10.7843	118	9.32203	127	17.3228
T1A;C19G	113	7.9646	108	6.48148	71	1.40845	113	7.07965	68	5.88235	93	11.828	69	4.34783	86	8.13953	105	11.4286	102	4.90196
T1A;C19T	84	0	92	1.08696	62	4.83871	87	3.44828	63	6.34921	74	6.75676	87	11.4943	74	6.75676	93	7.52688	77	7.79221
T1A;G20A	137	9.48905	127	14.9606	95	16.8421	136	16.1765	99	12.1212	103	11.6505	106	19.8113	105	5.71429	144	13.1944	121	19.0083
T1A;G20C	115	14.7826	123	8.13008	93	7.52688	135	12.5926	104	9.61538	93	6.45161	125	21.6	122	4.91803	139	12.2302	104	4.80769
T1A;G20T	140	17.8571	146	13.0137	96	20.8333	114	11.4035	109	15.5963	114	16.6667	119	26.0504	130	16.1538	151	12.5828	148	14.8649
T1A;A21C	91	6.59341	94	10.6383	73	17.8082	101	4.9505	80	5	74	6.75676	82	6.09756	82	14.6341	82	4.87805	88	10.2273
T1A;A21G	91	12.0879	115	9.56522	72	69.4444	91	24.1758	74	13.5135	72	44.4444	101	71.2871	85	18.8235	111	9.90991	84	59.5238
T1A;A21T	131	10.687	104	10.5769	76	19.7368	101	6.93069	77	3.8961	90	10	88	19.3182	95	9.47368	119	7.56303	100	8
T1A;C22A	108	3.7037	105	7.61905	96	9.375	93	3.22581	84	1.19048	82	3.65854	90	12.2222	100	3	120	8.33333	107	7.47664
T1A;C22G	60	3.33333	78	5.12821	39	2.5641	51	5.88235	56	1.78571	45	11.1111	41	4.87805	66	0	74	1.35135	56	7.14286
T1A;C22T	104	5.76923	116	2.58621	76	9.21053	130	2.30769	112	5.35714	73	2.73973	77	5.19481	111	5.40541	104	6.73077	96	6.25
T1A;C23A	61	0	70	4.28571	63	1.5873	84	3.57143	70	5.71429	67	5.97015	62	3.22581	81	2.46914	70	2.85714	76	1.31579
T1A;C23G	22	13.6364	18	0	31	6.45161	30	13.3333	22	4.54545	14	0	32	6.25	34	5.88235	33	21.2121	33	9.09091
T1A;C23T	81	2.46914	84	2.38095	53	3.77358	71	4.22535	64	4.6875	62	3.22581	72	2.77778	89	2.24719	105	4.7619	73	5.47945
T1A;C24A	61	9.83607	87	6.89655	67	11.9403	97	5.15464	69	5.7971	81	3.7037	87	17.2414	76	7.89474	101	8.91089	83	8.43373
T1A;C24G	78	12.8205	98	9.18367	51	9.80392	86	18.6047	73	13.6986	73	16.4384	91	12.0879	89	7.86517	91	7.69231	68	16.1765
T1A;C24T	90	4.44444	89	8.98876	74	33.7838	102	2.94118	105	10.4762	87	9.1954	85	24.7059	82	9.7561	97	11.3402	103	13.5922
T1A;G25A	99	0	123	4.06504	80	2.5	87	4.5977	96	3.125	89	1.1236	100	8	115	5.21739	125	4	105	1.90476
T1A;G25C	127	11.811	130	13.8462	100	6	105	11.4286	101	8.91089	150	6	115	13.913	128	13.2812	147	14.2857	135	10.3704
T1A;G25T	127	3.93701	131	5.34351	87	11.4943	125	8	102	1.96078	124	12.0968	102	9.80392	126	8.73016	160	6.25	100	5
T1A;T26A	144	10.4167	138	12.3188	177	61.5819	155	14.8387	118	13.5593	147	28.5714	193	69.9482	128	12.5	162	14.8148	174	48.8506
T1A;T26C	107	17.757	84	13.0952	106	76.4151	124	41.129	68	13.2353	119	53.7815	166	81.3253	91	23.0769	114	13.1579	147	79.5918
T1A;T26G	105	9.52381	126	10.3175	126	65.0794	115	13.0435	80	8.75	104	25.9615	136	62.5	122	25.4098	124	7.25806	149	34.2282
T1A;T27A	149	6.71141	152	10.5263	150	63.3333	143	17.4825	99	6.06061	118	16.9492	141	65.2482	128	11.7188	137	16.7883	148	45.2703
T1A;T27C	101	16.8317	84	10.7143	128	74.2188	112	30.3571	68	25	111	58.5586	127	78.7402	101	21.7822	91	13.1868	129	66.6667
T1A;T27G	127	11.811	119	14.2857	85	29.4118	129	10.0775	78	10.2564	106	7.54717	94	29.7872	90	3.33333	117	7.69231	107	14.9533
T1A;T28A	147	8.16327	155	7.74194	141	58.156	136	16.9118	90	14.4444	115	20.8696	181	54.1436	125	8	137	4.37956	152	35.5263
T1A;T28C	92	8.69565	98	8.16327	70	38.5714	91	17.5824	100	13	96	17.7083	94	46.8085	97	9.27835	101	13.8614	92	28.2609
T1A;T28G	76	7.89474	113	10.6195	73	23.2877	106	15.0943	83	8.43373	90	21.1111	96	21.875	88	19.3182	119	15.9664	87	14.9425
T1A;T29A	128	13.2812	124	5.64516	142	50.7042	128	14.0625	93	9.67742	128	21.0938	164	59.7561	130	7.69231	116	17.2414	149	32.8859
T1A;T29C	69	13.0435	112	17.8571	113	73.4513	100	58	81	28.3951	102	54.902	142	72.5352	113	26.5487	130	20.7692	150	66.6667
T1A;T29G	93	6.45161	99	5.05051	74	37.8378	94	7.44681	74	10.8108	77	3.8961	86	31.3953	111	8.10811	91	13.1868	97	16.4948
T1A;C30A	127	3.14961	104	7.69231	97	42.268	132	12.8788	123	0.813008	90	7.77778	110	50.9091	137	9.48905	116	9.48276	131	22.9008
T1A;C30G	96	2.08333	101	7.92079	61	13.1148	86	4.65116	74	1.35135	70	11.4286	67	17.9104	68	1.47059	91	2.1978	83	10.8434
T1A;C30T	137	8.0292	139	13.6691	122	64.7541	142	14.0845	129	13.9535	143	27.2727	172	63.9535	155	10.3226	164	6.70732	148	36.4865
T1A;C31A	96	2.08333	94	7.44681	54	20.3704	115	5.21739	73	2.73973	81	7.40741	59	35.5932	81	4.93827	114	4.38596	81	11.1111
T1A;C31G	64	7.8125	100	6	65	38.4615	108	9.25926	74	8.10811	59	5.08475	84	44.0476	70	5.71429	98	8.16327	80	22.5
T1A;C31T	110	2.72727	99	6.06061	91	63.7363	106	14.1509	89	5.61798	83	24.0964	115	51.3043	123	5.69106	116	6.03448	113	31.8584
T1A;C32A	120	10	127	14.1732	179	74.8603	127	25.9843	83	14.4578	164	51.8293	166	79.5181	111	9.90991	128	14.8438	167	71.8563
T1A;C32G	86	4.65116	82	4.87805	31	61.2903	69	27.5362	56	16.0714	37	40.5405	41	78.0488	70	17.1429	88	10.2273	57	64.9123
T1A;C32T	114	9.64912	123	16.2602	137	84.6715	133	44.3609	81	14.8148	127	48.8189	176	77.8409	135	12.5926	126	15.873	181	69.6133
T1A;T33A	132	13.6364	139	10.7914	166	84.9398	133	33.8346	114	14.0351	123	53.6585	202	84.1584	136	17.6471	160	11.25	194	65.9794
T1A;T33C	127	10.2362	121	11.5702	135	66.6667	103	37.8641	93	13.9785	112	39.2857	138	73.1884	98	20.4082	131	12.9771	125	56
T1A;T33G	93	9.67742	87	13.7931	82	30.4878	102	12.7451	89	17.9775	67	10.4478	87	24.1379	93	17.2043	102	10.7843	101	22.7723
T1A;C34A	143	13.986	154	12.987	175	88	147	33.3333	114	14.9123	149	45.6376	197	82.2335	129	16.2791	161	16.7702	203	69.4581
T1A;C34G	117	8.54701	107	14.0187	128	53.125	147	21.7687	115	8.69565	135	30.3704	116	60.3448	118	13.5593	151	11.2583	117	47.8632
T1A;C34T	149	14.094	126	12.6984	226	76.5487	181	30.3867	111	13.5135	142	50.7042	257	80.9339	170	9.41176	173	17.341	223	72.1973
T1A;T35A	129	8.52713	86	18.6047	151	80.7947	123	25.2033	112	13.3929	131	35.1145	168	75.5952	123	17.0732	130	15.3846	179	63.6872
T1A;T35C	84	10.7143	86	18.6047	145	87.5862	108	32.4074	94	17.0213	140	56.4286	168	80.9524	87	20.6897	93	10.7527	147	74.1497
T1A;T35G	94	7.44681	77	10.3896	111	56.7568	106	20.7547	74	13.5135	77	36.3636	124	54.8387	95	18.9474	102	12.7451	124	49.1935
T1A;T36A	115	6.08696	101	10.8911	105	67.619	141	19.1489	84	14.2857	122	32.7869	115	60.8696	109	21.1009	121	4.95868	132	53.7879
T1A;T36C	85	1.17647	77	6.49351	57	14.0351	62	3.22581	69	2.89855	64	3.125	58	15.5172	70	4.28571	101	8.91089	72	12.5
T1A;T36G	116	10.3448	101	17.8218	117	75.2137	122	56.5574	82	19.5122	117	69.2308	118	70.339	102	31.3725	111	9.90991	147	67.3469
T1A;T37A	94	11.7021	97	10.3093	91	71.4286	88	14.7727	86	6.97674	105	34.2857	81	60.4938	111	4.5045	96	13.5417	106	50
T1A;T37C	87	16.092	104	11.5385	90	73.3333	108	22.2222	74	18.9189	85	32.9412	108	75	70	18.5714	108	14.8148	110	56.3636
T1A;T37G	107	5.60748	98	14.2857	94	70.2128	122	48.3607	91	6.59341	96	61.4583	118	78.8136	92	25	100	6	123	65.8537
T1A;C38A	108	5.55556	115	3.47826	98	58.1633	109	13.7615	100	2	114	25.4386	94	42.5532	147	6.80272	123	8.13008	106	45.283
T1A;C38G	97	6.18557	99	6.06061	87	54.023	127	9.44882	67	10.4478	71	14.0845	97	68.0412	111	8.10811	110	9.09091	118	48.3051
T1A;C38T	98	8.16327	127	5.51181	79	58.2278	124	12.9032	83	9.63855	71	18.3099	96	53.125	92	10.8696	130	8.46154	79	46.8354
T1A;A39C	94	15.9574	147	8.84354	112	68.75	122	28.6885	111	8.10811	106	46.2264	90	78.8889	107	12.1495	145	11.0345	130	56.1538
T1A;A39G	126	5.55556	155	9.03226	134	66.4179	132	18.1818	129	23.2558	113	30.0885	136	69.1176	121	14.876	133	12.0301	154	52.5974
T1A;A39T	109	13.7615	116	6.03448	126	53.1746	146	18.4932	119	11.7647	116	18.1034	138	61.5942	102	6.86275	140	12.8571	126	28.5714
T1A;T40A	96	6.25	115	8.69565	93	50.5376	118	20.339	87	17.2414	88	29.5455	104	61.5385	119	12.605	138	5.7971	126	52.381
T1A;T40C	98	7.14286	126	4.7619	104	76.9231	96	17.7083	95	7.36842	100	33	95	71.5789	89	15.7303	138	6.52174	135	62.963
T1A;T40G	94	7.44681	114	7.89474	83	55.4217	121	11.5702	71	5.6338	84	28.5714	119	54.6218	93	11.828	98	9.18367	101	35.6436
T1A;T41A	85	4.70588	102	8.82353	130	51.5385	104	17.3077	80	6.25	114	38.5965	134	62.6866	119	7.56303	124	5.64516	108	37.037
T1A;T41C	90	1.11111	96	5.20833	98	50	91	19.7802	71	4.22535	96	25	82	60.9756	79	11.3924	94	12.766	112	53.5714
T1A;T41G	88	4.54545	99	6.06061	73	38.3562	124	7.25806	69	5.7971	84	10.7143	82	41.4634	79	2.53165	113	11.5044	87	27.5862
T1A;G42A	112	7.14286	138	6.52174	114	59.6491	141	14.1844	112	7.14286	92	27.1739	113	53.9823	131	13.7405	131	9.16031	105	46.6667
T1A;G42C	117	4.2735	117	11.9658	109	64.2202	130	18.4615	92	4.34783	97	26.8041	145	69.6552	107	13.0841	143	6.99301	121	42.1488
T1A;G42T	161	6.8323	140	5	105	58.0952	127	21.2598	121	5.78512	129	28.6822	139	62.5899	127	10.2362	166	11.4458	133	51.1278
T1A;C43A	137	10.219	134	4.47761	104	42.3077	126	13.4921	137	6.56934	119	12.605	135	42.2222	123	13.8211	161	4.96894	137	27.7372
T1A;C43G	83	13.253	112	8.03571	81	22.2222	96	6.25	84	4.7619	65	6.15385	88	14.7727	79	18.9873	118	4.23729	83	15.6627
T1A;C43T	127	3.14961	138	11.5942	98	63.2653	136	21.3235	118	8.47458	95	27.3684	100	56	114	9.64912	141	7.0922	101	52.4752
T1A;G44A	125	4	143	1.3986	95	8.42105	143	6.29371	126	3.1746	129	3.87597	141	10.6383	137	2.91971	166	9.03614	138	5.7971
T1A;G44C	131	0.763359	149	5.36913	143	48.951	135	14.0741	126	7.93651	119	30.2521	132	65.9091	108	12.037	156	5.12821	145	44.1379
T1A;G44T	142	1.40845	183	5.46448	107	29.9065	162	9.25926	115	9.56522	125	12.8	109	42.2018	150	6	172	2.90698	140	19.2857
T1A;C45A	130	8.46154	106	3.77358	87	9.1954	102	3.92157	89	5.61798	81	9.87654	75	17.3333	107	9.34579	106	4.71698	113	2.65487
T1A;C45G	99	1.0101	99	1.0101	69	5.7971	97	4.12371	80	7.5	75	5.33333	68	13.2353	83	9.63855	84	3.57143	88	7.95455
T1A;C45T	112	1.78571	103	3.8835	60	28.3333	95	3.15789	87	2.29885	69	17.3913	97	38.1443	108	4.62963	157	8.28025	102	17.6471
T1A;G46A	104	12.5	120	15.8333	83	66.2651	106	60.3774	117	32.4786	114	60.5263	108	72.2222	98	52.0408	113	23.8938	95	69.4737
T1A;G46C	153	11.7647	195	7.69231	115	41.7391	152	7.23684	119	8.40336	131	8.39695	168	48.8095	154	13.6364	173	7.51445	156	25.641
T1A;G46T	136	32.3529	169	47.3373	151	68.8742	153	54.902	118	33.8983	132	55.303	172	70.3488	124	25	167	30.5389	134	56.7164
T1A;G47A	126	15.873	113	25.6637	127	58.2677	159	23.8994	119	25.2101	120	21.6667	179	67.5978	132	24.2424	151	16.5563	150	31.3333
T1A;G47C	119	12.605	131	18.3206	107	36.4486	127	18.1102	99	18.1818	102	18.6275	148	46.6216	120	18.3333	145	18.6207	140	23.5714
T1A;G47T	144	16.6667	148	17.5676	130	45.3846	128	32.8125	142	24.6479	113	19.469	151	52.9801	153	18.9542	198	19.697	137	24.8175
T1A;G48A	116	8.62069	152	9.86842	90	11.1111	131	12.2137	84	9.52381	113	14.1593	107	18.6916	124	11.2903	183	12.0219	125	13.6
T1A;G48C	90	20	110	30	51	9.80392	118	16.9492	98	24.4898	107	18.6916	78	35.8974	91	21.978	143	20.2797	102	27.451
T1A;G48T	153	13.0719	148	11.4865	130	33.8462	133	17.2932	142	16.9014	131	16.0305	142	42.2535	148	10.1351	186	10.2151	135	25.1852
T1A;G49A	128	9.375	128	4.6875	104	9.61538	128	3.90625	129	8.52713	135	5.18519	115	12.1739	121	2.47934	154	6.49351	126	9.52381
T1A;G49C	136	3.67647	132	7.57576	91	4.3956	139	6.47482	94	4.25532	109	6.42202	111	9.00901	102	4.90196	127	5.51181	123	3.25203
T1A;G49T	134	4.47761	136	2.94118	105	6.66667	121	9.09091	115	2.6087	132	2.27273	105	1.90476	149	6.71141	163	6.74847	135	2.22222
T1A;A50C	100	8	87	11.4943	67	10.4478	110	5.45455	62	6.45161	76	7.89474	80	11.25	93	6.45161	118	11.0169	86	9.30233
T1A;A50G	71	4.22535	98	7.14286	54	9.25926	96	1.04167	76	5.26316	83	4.81928	79	12.6582	92	4.34783	116	2.58621	63	4.7619
T1A;A50T	106	10.3774	85	8.23529	80	6.25	108	9.25926	83	9.63855	99	9.09091	103	7.76699	102	12.7451	147	4.7619	106	10.3774
T1A;C51A	102	5.88235	101	6.93069	55	3.63636	108	6.48148	106	8.49057	96	6.25	88	10.2273	80	5	111	12.6126	106	7.54717
T1A;C51G	119	5.88235	80	6.25	75	9.33333	101	5.94059	108	4.62963	77	9.09091	81	9.87654	87	5.74713	119	11.7647	73	2.73973
T1A;C51T	109	5.50459	78	7.69231	81	9.87654	108	7.40741	82	8.53659	90	13.3333	93	18.2796	96	6.25	121	5.78512	97	10.3093
T1A;G52A	98	4.08163	101	8.91089	82	10.9756	117	10.2564	86	15.1163	91	8.79121	89	17.9775	97	6.18557	129	10.0775	100	11
T1A;G52C	68	4.41176	87	5.74713	71	2.8169	95	5.26316	62	8.06452	70	8.57143	70	12.8571	76	2.63158	106	4.71698	92	6.52174
T1A;G52T	77	2.5974	97	7.21649	72	9.72222	111	9.00901	69	7.24638	85	16.4706	91	17.5824	103	3.8835	89	8.98876	86	4.65116
T1A;A53C	113	9.73451	120	14.1667	81	13.5802	95	11.5789	87	4.5977	93	7.52688	82	8.53659	105	9.52381	127	14.9606	97	5.15464
T1A;A53G	101	8.91089	111	9.00901	62	40.3226	106	19.8113	77	3.8961	85	7.05882	76	35.5263	100	4	103	6.79612	114	14.9123
T1A;A53T	92	10.8696	103	6.79612	78	11.5385	129	8.52713	101	10.8911	97	7.21649	87	12.6437	116	9.48276	144	11.1111	116	7.75862
T1A;C54A	136	9.55882	132	13.6364	85	9.41176	113	6.19469	116	7.75862	122	14.7541	103	19.4175	116	2.58621	131	9.92366	105	14.2857
T1A;C54G	119	8.40336	109	4.58716	100	6	109	6.42202	74	8.10811	110	11.8182	94	8.51064	106	8.49057	105	11.4286	108	1.85185
T1A;C54T	132	6.06061	115	7.82609	94	10.6383	132	4.54545	107	4.6729	107	9.34579	93	8.60215	113	10.6195	147	12.2449	113	10.6195
T1A;C55A	85	5.88235	81	8.64198	65	10.7692	106	2.83019	73	6.84932	67	10.4478	82	25.6098	91	2.1978	103	4.85437	99	9.09091
T1A;C55G	36	27.7778	40	17.5	44	31.8182	37	32.4324	46	26.087	51	27.451	58	22.4138	39	12.8205	48	50	56	25
T1A;C55T	118	4.23729	119	6.72269	92	46.7391	123	11.3821	103	7.76699	110	19.0909	121	41.3223	109	7.33945	122	9.01639	145	21.3793
T1A;C56A	105	5.71429	125	5.6	91	13.1868	112	12.5	94	2.12766	103	13.5922	86	15.1163	132	5.30303	135	5.92593	97	13.4021
T1A;C56G	78	2.5641	84	2.38095	59	6.77966	75	1.33333	82	2.43902	69	1.44928	72	2.77778	86	0	90	3.33333	71	2.8169
T1A;C56T	126	5.55556	127	14.1732	115	22.6087	128	9.375	120	6.66667	87	13.7931	130	43.0769	134	9.70149	159	4.40252	148	21.6216
T1A;T57A	107	6.54206	101	2.9703	90	16.6667	120	6.66667	97	5.15464	103	4.85437	86	19.7674	104	6.73077	119	5.88235	91	8.79121
T1A;T57C	126	5.55556	118	12.7119	69	55.0725	110	19.0909	112	12.5	92	35.8696	76	57.8947	116	9.48276	171	9.35673	91	60.4396
T1A;T57G	102	1.96078	100	4	63	7.93651	83	3.61446	82	3.65854	98	10.2041	81	14.8148	101	0.990099	125	4.8	101	7.92079
T1A;G58A	72	8.33333	100	8	101	66.3366	75	26.6667	60	25	107	44.8598	137	75.9124	94	19.1489	89	14.6067	118	49.1525
T1A;G58C	78	12.8205	76	11.8421	83	62.6506	77	18.1818	61	14.7541	72	31.9444	104	75.9615	72	15.2778	96	12.5	93	46.2366
T1A;G58T	134	11.9403	138	15.2174	143	67.1329	129	27.1318	112	15.1786	117	29.9145	193	77.2021	136	19.1176	155	14.8387	156	42.9487
T1A;C59A	83	21.6867	105	20	154	80.5195	134	55.2239	90	27.7778	116	68.1034	181	86.1878	93	24.7312	111	23.4234	158	77.8481
T1A;C59G	63	14.2857	51	9.80392	55	58.1818	47	27.6596	45	6.66667	56	37.5	56	44.6429	48	14.5833	62	6.45161	58	44.8276
T1A;C59T	100	9	134	13.4328	118	72.0339	98	37.7551	119	17.6471	109	45.8716	146	76.7123	129	20.155	115	15.6522	135	65.9259
T1A;A60C	117	10.2564	129	4.65116	103	63.1068	95	14.7368	120	8.33333	87	20.6897	122	50.8197	125	11.2	127	7.87402	142	36.6197
T1A;A60G	95	1.05263	104	12.5	44	52.2727	101	14.8515	83	8.43373	68	29.4118	76	43.4211	96	17.7083	109	6.42202	89	41.573
T1A;A60T	130	7.69231	136	6.61765	83	22.8916	122	15.5738	69	10.1449	84	16.6667	98	30.6122	97	9.27835	121	8.26446	123	18.6992
T1A;G61A	119	4.20168	131	4.58015	100	53	131	16.0305	109	13.7615	113	29.2035	84	54.7619	112	11.6071	136	11.0294	109	45.8716
T1A;G61C	137	7.29927	143	13.986	175	72	171	29.2398	116	18.1034	129	36.4341	170	63.5294	121	19.0083	158	6.32911	172	52.907
T1A;G61T	142	4.22535	143	5.59441	150	72.6667	147	24.4898	109	11.9266	118	32.2034	163	80.9816	154	16.8831	159	11.3208	179	59.7765
T1A;A62C	72	13.8889	102	18.6275	156	89.1026	160	48.75	87	35.6322	142	71.1268	152	88.1579	110	25.4545	123	18.6992	166	81.9277
T1A;A62G	101	9.90099	103	14.5631	91	53.8462	100	32	56	21.4286	68	30.8824	91	69.2308	78	15.3846	89	19.1011	108	37.963
T1A;A62T	138	10.1449	101	12.8713	121	46.281	116	15.5172	92	14.1304	92	25	146	59.589	111	14.4144	138	10.8696	137	37.9562
T1A;G63A	171	9.35673	170	10	152	59.8684	173	12.1387	133	9.77444	136	15.4412	167	52.0958	124	13.7097	166	11.4458	154	32.4675
T1A;G63C	130	6.15385	122	8.19672	171	63.1579	169	14.7929	105	7.61905	133	12.0301	186	63.9785	141	9.92908	142	7.74648	170	34.7059
T1A;G63T	173	6.35838	162	9.25926	271	87.0849	182	26.3736	112	12.5	206	53.3981	346	88.1503	141	14.8936	178	14.6067	263	75.2852
T1A;A64C	115	12.1739	79	12.6582	106	60.3774	96	11.4583	84	8.33333	87	24.1379	126	57.9365	99	21.2121	120	5	105	38.0952
T1A;A64G	100	14	111	18.018	147	77.551	123	28.4553	102	15.6863	99	58.5859	115	84.3478	92	25	105	17.1429	173	70.5202
T1A;A64T	96	11.4583	99	17.1717	126	73.0159	104	16.3462	101	13.8614	105	29.5238	175	80	120	12.5	128	8.59375	165	61.8182
T1A;G65A	123	9.7561	155	12.9032	278	94.2446	281	91.4591	150	37.3333	246	87.8049	282	95.3901	228	69.7368	167	23.9521	339	93.5103
T1A;G65C	121	9.91736	116	9.48276	63	88.8889	106	70.7547	88	17.0455	93	75.2688	94	81.9149	104	45.1923	119	11.7647	77	84.4156
T1A;G65T	133	12.782	144	17.3611	196	95.9184	282	91.4894	134	60.4478	231	88.7446	241	94.1909	201	78.1095	166	33.7349	282	95.7447
T1A;G66A	97	11.3402	106	18.8679	98	87.7551	108	78.7037	97	80.4124	98	83.6735	85	88.2353	106	75.4717	131	46.5649	114	89.4737
T1A;G66C	106	21.6981	86	32.5581	167	91.6168	232	92.6724	144	87.5	173	93.6416	183	95.082	198	89.3939	131	48.0916	193	93.7824
T1A;G66T	103	23.301	110	49.0909	83	87.9518	132	86.3636	100	79	113	82.3009	110	92.7273	113	73.4513	134	75.3731	121	95.0413
T1A;C67A	53	18.8679	55	29.0909	25	52	31	70.9677	32	62.5	37	45.9459	26	57.6923	52	42.3077	50	40	42	61.9048
T1A;C67G	63	3.1746	81	4.93827	23	39.1304	37	35.1351	36	0	22	27.2727	14	42.8571	55	9.09091	70	5.71429	18	44.4444
T1A;C67T	85	3.52941	65	10.7692	18	61.1111	36	55.5556	58	29.3103	37	37.8378	23	65.2174	58	37.931	81	12.3457	28	46.4286
T1A;T68A	57	7.01754	61	34.4262	22	50	35	80	35	60	34	61.7647	34	67.6471	49	51.0204	40	50	48	70.8333
T1A;T68C	69	8.69565	66	19.697	25	84	39	58.9744	23	17.3913	28	53.5714	34	55.8824	51	45.098	59	27.1186	30	53.3333
T1A;T68G	65	1.53846	69	4.34783	13	30.7692	40	12.5	54	12.963	27	14.8148	19	31.5789	65	9.23077	88	5.68182	26	42.3077
T1A;G69A	117	48.7179	152	70.3947	106	83.0189	172	89.5349	125	76.8	108	86.1111	140	87.8571	159	79.8742	197	76.1421	156	86.5385
T1A;G69C	84	39.2857	87	63.2184	78	89.7436	97	92.7835	72	84.7222	84	89.2857	73	89.0411	94	74.4681	117	74.359	84	79.7619
T1A;G69T	113	52.2124	157	79.6178	118	94.0678	167	88.024	141	81.5603	130	86.9231	136	94.8529	147	87.7551	150	74	141	92.1986
T1A;A70C	65	24.6154	108	40.7407	135	91.1111	144	81.25	97	45.3608	133	92.4812	126	92.0635	138	77.5362	135	37.7778	142	88.7324
T1A;A70G	92	5.43478	97	14.433	93	80.6452	86	59.3023	88	10.2273	110	62.7273	94	86.1702	74	28.3784	113	15.9292	136	77.9412
T1A;A70T	118	23.7288	131	25.1908	170	91.1765	171	68.4211	102	24.5098	167	85.6287	203	93.5961	94	38.2979	147	31.9728	192	89.5833
T1A;A71C	125	14.4	121	20.6612	173	89.0173	159	67.9245	96	28.125	154	75.3247	207	88.8889	127	34.6457	144	29.1667	217	85.7143
T1A;A71G	110	9.09091	95	13.6842	171	92.9825	137	72.9927	86	25.5814	145	85.5172	172	95.3488	134	43.2836	132	18.1818	229	84.7162
T1A;A71T	96	12.5	111	13.5135	193	88.601	130	54.6154	86	25.5814	153	72.549	245	90.2041	116	31.0345	122	21.3115	204	86.2745
T1A;A72C	96	14.5833	109	7.33945	136	70.5882	128	31.25	100	12	119	37.8151	172	77.3256	100	16	130	15.3846	158	65.8228
T1A;A72G	113	7.07965	124	11.2903	190	85.7895	149	38.255	122	14.7541	145	62.7586	184	92.3913	124	25.8065	136	11.7647	213	80.2817
T1A;A72T	95	11.5789	106	13.2075	109	65.1376	120	21.6667	91	10.989	96	22.9167	125	51.2	127	11.0236	120	15	152	52.6316
T1C;T2A	101	10.8911	109	17.4312	105	81.9048	98	61.2245	87	27.5862	96	65.625	94	81.9149	118	28.8136	125	20.8	109	73.3945
T1C;T2C	57	15.7895	55	23.6364	60	83.3333	73	64.3836	33	54.5455	85	64.7059	81	80.2469	72	41.6667	87	32.1839	95	73.6842
T1C;T2G	94	26.5957	88	26.1364	77	81.8182	114	63.1579	91	31.8681	76	71.0526	69	89.8551	104	34.6154	81	34.5679	95	83.1579
T1C;T3A	57	17.5439	58	34.4828	57	66.6667	64	70.3125	49	42.8571	53	66.0377	52	88.4615	57	49.1228	69	42.029	52	71.1538
T1C;T3C	48	22.9167	57	28.0702	45	80	65	66.1538	51	39.2157	55	72.7273	55	80	64	40.625	68	33.8235	65	72.3077
T1C;T3G	49	24.4898	48	35.4167	46	73.913	65	73.8462	42	40.4762	52	76.9231	42	92.8571	60	58.3333	56	50	57	87.7193
T1C;C4A	49	16.3265	32	37.5	37	51.3514	31	51.6129	26	57.6923	31	38.7097	21	61.9048	53	39.6226	65	47.6923	34	64.7059
T1C;C4G	47	27.6596	66	45.4545	30	63.3333	31	38.7097	38	63.1579	39	48.7179	38	71.0526	63	52.381	74	60.8108	48	79.1667
T1C;C4T	56	16.0714	48	33.3333	24	54.1667	59	57.6271	40	40	40	70	40	62.5	35	60	79	41.7722	38	68.4211
T1C;A5C	35	5.71429	56	46.4286	29	65.5172	49	53.0612	42	28.5714	43	48.8372	35	65.7143	37	37.8378	50	32	39	71.7949
T1C;A5G	60	26.6667	73	49.3151	57	89.4737	71	84.507	60	68.3333	47	70.2128	59	88.1356	41	56.0976	73	56.1644	57	87.7193
T1C;A5T	39	5.12821	31	9.67742	10	40	14	7.14286	17	35.2941	16	25	10	10	17	11.7647	26	11.5385	6	16.6667
T1C;G6A	122	66.3934	125	81.6	104	86.5385	154	82.4675	121	82.6446	119	80.6723	111	91.8919	122	85.2459	156	76.9231	149	89.2617
T1C;G6C	95	67.3684	95	77.8947	92	91.3043	105	80	108	80.5556	91	85.7143	80	85	102	79.4118	113	69.0265	123	83.7398
T1C;G6T	95	51.5789	101	72.2772	87	85.0575	130	89.2308	67	88.0597	98	84.6939	78	91.0256	126	84.127	125	77.6	110	87.2727
T1C;C7A	156	79.4872	149	88.5906	148	88.5135	143	90.2098	132	89.3939	150	85.3333	131	87.7863	168	89.881	224	83.9286	155	87.7419
T1C;C7G	145	77.2414	168	87.5	96	87.5	185	90.2703	134	89.5522	131	83.9695	127	91.3386	154	86.3636	174	85.6322	140	85
T1C;C7T	100	42	114	57.8947	107	91.5888	177	87.0056	123	73.9837	110	81.8182	125	88.8	139	70.5036	158	66.4557	167	92.8144
T1C;C8A	84	36.9048	110	45.4545	135	85.1852	178	84.2697	112	72.3214	122	84.4262	129	88.3721	143	67.8322	127	55.9055	126	86.5079
T1C;C8G	151	85.4305	158	94.3038	145	91.7241	194	91.7526	136	97.0588	150	88.6667	134	97.0149	176	84.6591	223	92.3767	186	96.7742
T1C;C8T	99	25.2525	121	42.9752	116	88.7931	127	70.0787	102	42.1569	98	82.6531	134	85.0746	141	53.9007	161	34.1615	137	89.0511
T1C;G9A	128	10.1562	126	5.55556	94	55.3191	123	16.2602	113	9.73451	92	21.7391	102	64.7059	129	10.8527	126	5.55556	132	28.7879
T1C;G9C	101	7.92079	98	10.2041	71	23.9437	98	8.16327	91	6.59341	96	7.29167	94	27.6596	96	10.4167	125	4.8	83	6.0241
T1C;G9T	118	8.47458	117	12.8205	81	43.2099	119	12.605	104	9.61538	72	11.1111	70	38.5714	106	7.54717	130	5.38462	100	24
T1C;G10A	111	9.90991	126	11.9048	117	75.2137	151	30.4636	109	22.0183	116	43.9655	149	75.1678	100	26	124	13.7097	149	60.4027
T1C;G10C	92	5.43478	69	11.5942	78	55.1282	78	21.7949	77	11.6883	75	17.3333	79	55.6962	86	12.7907	101	10.8911	102	26.4706
T1C;G10T	99	1.0101	104	9.61538	80	33.75	96	11.4583	102	12.7451	109	17.4312	96	60.4167	107	10.2804	131	9.92366	97	20.6186
T1C;A11C	52	17.3077	50	10	35	28.5714	55	3.63636	44	18.1818	45	13.3333	51	29.4118	45	15.5556	60	8.33333	59	23.7288
T1C;A11G	72	26.3889	96	37.5	80	88.75	109	86.2385	85	56.4706	92	85.8696	78	88.4615	83	54.2169	94	39.3617	119	85.7143
T1C;A11T	78	5.12821	85	14.1176	48	27.0833	107	14.0187	74	6.75676	66	24.2424	50	52	75	4	100	6	82	24.3902
T1C;A12C	84	19.0476	76	11.8421	56	25	80	3.75	70	4.28571	76	10.5263	60	51.6667	64	6.25	96	10.4167	82	15.8537
T1C;A12G	70	17.1429	68	13.2353	61	86.8852	88	42.0455	78	20.5128	73	63.0137	66	78.7879	86	29.0698	90	17.7778	82	81.7073
T1C;A12T	102	3.92157	89	3.37079	56	12.5	85	17.6471	86	9.30233	84	8.33333	59	16.9492	70	12.8571	97	11.3402	81	12.3457
T1C;G13A	141	59.5745	132	60.6061	102	81.3725	135	80	123	84.5528	117	85.4701	109	86.2385	122	78.6885	161	76.3975	164	84.1463
T1C;G13C	94	10.6383	89	8.98876	49	75.5102	90	47.7778	89	26.9663	71	59.1549	58	77.5862	78	32.0513	135	24.4444	70	74.2857
T1C;G13T	106	18.8679	119	23.5294	72	76.3889	136	61.7647	93	46.2366	68	64.7059	87	68.9655	120	50.8333	139	36.6906	98	72.449
T1C;C14A	90	23.3333	109	22.9358	73	16.4384	106	29.2453	93	25.8065	69	21.7391	71	14.0845	108	20.3704	97	24.7423	62	22.5806
T1C;C14G	73	23.2877	73	13.6986	40	15	84	23.8095	53	18.8679	65	15.3846	67	28.3582	61	24.5902	95	24.2105	61	21.3115
T1C;C14T	88	10.2273	121	7.43802	71	16.9014	87	17.2414	77	16.8831	80	13.75	85	27.0588	107	9.34579	105	14.2857	101	11.8812
T1C;G15A	97	8.24742	108	11.1111	71	8.4507	96	13.5417	89	8.98876	71	9.85915	80	8.75	96	13.5417	125	12.8	115	7.82609
T1C;G15C	83	14.4578	58	18.9655	48	25	73	17.8082	60	18.3333	73	13.6986	66	36.3636	74	10.8108	100	21	79	22.7848
T1C;G15T	107	12.1495	101	12.8713	65	21.5385	101	16.8317	79	18.9873	88	22.7273	74	50	90	12.2222	124	16.129	81	24.6914
T1C;G16A	132	3.78788	118	9.32203	73	4.10959	133	8.27068	103	8.73786	85	12.9412	92	23.913	107	7.47664	120	9.16667	128	15.625
T1C;G16C	82	13.4146	104	14.4231	52	25	133	19.5489	85	14.1176	75	17.3333	61	22.9508	93	9.67742	89	10.1124	115	14.7826
T1C;G16T	102	10.7843	101	11.8812	86	17.4419	99	18.1818	117	14.5299	106	17.9245	95	26.3158	114	21.0526	127	20.4724	94	13.8298
T1C;G17A	109	11.9266	121	18.1818	85	23.5294	120	21.6667	103	20.3883	104	17.3077	102	35.2941	135	16.2963	128	17.9688	120	25.8333
T1C;G17C	65	18.4615	95	21.0526	56	55.3571	79	34.1772	71	26.7606	85	40	60	56.6667	75	25.3333	114	21.9298	91	46.1538
T1C;G17T	121	8.26446	103	13.5922	64	21.875	130	23.0769	130	15.3846	96	21.875	72	45.8333	105	16.1905	119	21.0084	130	25.3846
T1C;A18C	69	1.44928	70	1.42857	46	8.69565	73	2.73973	70	2.85714	65	12.3077	60	15	68	7.35294	59	15.2542	64	6.25
T1C;A18G	84	7.14286	88	17.0455	56	16.0714	87	8.04598	92	18.4783	80	8.75	68	19.1176	75	10.6667	106	19.8113	102	11.7647
T1C;A18T	58	5.17241	43	6.97674	42	14.2857	44	11.3636	37	13.5135	48	6.25	46	17.3913	39	5.12821	60	5	66	7.57576
T1C;C19A	116	20.6897	102	21.5686	70	37.1429	115	35.6522	83	15.6627	78	17.9487	104	38.4615	124	20.9677	140	20	93	21.5054
T1C;C19G	89	12.3596	70	5.71429	59	20.339	78	10.2564	66	10.6061	70	10	62	17.7419	86	9.30233	94	7.44681	91	16.4835
T1C;C19T	85	14.1176	122	11.4754	79	16.4557	103	17.4757	96	17.7083	115	20	87	26.4368	114	11.4035	122	11.4754	118	23.7288
T1C;G20A	88	43.1818	138	47.1014	88	57.9545	155	49.6774	120	41.6667	103	51.4563	109	56.8807	120	40.8333	146	36.3014	126	53.1746
T1C;G20C	98	7.14286	89	4.49438	79	22.7848	106	12.2642	90	12.2222	75	14.6667	84	25	130	6.92308	121	6.61157	85	21.1765
T1C;G20T	120	25.8333	103	29.1262	79	31.6456	145	39.3103	99	37.3737	130	34.6154	102	46.0784	109	32.1101	136	39.7059	139	33.8129
T1C;A21C	81	6.17284	90	3.33333	46	8.69565	75	12	62	6.45161	75	14.6667	85	20	82	2.43902	75	13.3333	83	20.4819
T1C;A21G	59	15.2542	82	20.7317	77	84.4156	94	62.766	58	34.4828	78	66.6667	77	88.3117	79	31.6456	101	23.7624	105	83.8095
T1C;A21T	67	7.46269	86	11.6279	59	25.4237	74	10.8108	59	13.5593	59	22.0339	71	29.5775	77	19.4805	81	14.8148	80	22.5
T1C;C22A	92	15.2174	98	8.16327	67	31.3433	103	12.6214	82	14.6341	77	18.1818	90	34.4444	99	17.1717	110	14.5455	110	20.9091
T1C;C22G	66	13.6364	58	15.5172	39	10.2564	86	3.48837	53	13.2075	47	6.38298	58	5.17241	55	5.45455	76	13.1579	66	6.06061
T1C;C22T	87	2.29885	105	9.52381	69	13.0435	75	5.33333	70	8.57143	80	11.25	78	20.5128	95	5.26316	107	12.1495	78	14.1026
T1C;C23A	103	8.73786	113	17.6991	48	29.1667	95	8.42105	79	18.9873	84	17.8571	94	28.7234	84	13.0952	104	15.3846	85	18.8235
T1C;C23G	68	38.2353	93	63.4409	62	51.6129	87	55.1724	72	55.5556	76	56.5789	66	59.0909	90	48.8889	129	58.9147	93	63.4409
T1C;C23T	78	10.2564	93	7.52688	75	21.3333	115	10.4348	90	8.88889	74	6.75676	78	17.9487	91	14.2857	95	7.36842	84	19.0476
T1C;C24A	77	18.1818	81	25.9259	76	26.3158	95	25.2632	81	25.9259	68	25	64	40.625	97	18.5567	92	25	82	24.3902
T1C;C24G	89	22.4719	99	37.3737	61	40.9836	77	35.0649	80	42.5	70	34.2857	66	53.0303	76	19.7368	112	40.1786	89	40.4494
T1C;C24T	69	24.6377	102	32.3529	73	60.274	97	42.268	93	20.4301	70	34.2857	94	55.3191	82	26.8293	99	29.2929	89	48.3146
T1C;G25A	124	5.64516	130	11.5385	80	13.75	126	8.73016	98	14.2857	78	12.8205	103	18.4466	118	12.7119	132	12.1212	109	9.17431
T1C;G25C	110	16.3636	122	18.8525	76	23.6842	94	6.38298	74	10.8108	88	18.1818	104	19.2308	97	11.3402	103	16.5049	119	10.084
T1C;G25T	96	3.125	110	13.6364	100	16	117	11.9658	89	11.236	116	17.2414	87	50.5747	100	16	131	12.2137	108	20.3704
T1C;T26A	94	10.6383	113	16.8142	146	78.7671	141	32.6241	88	15.9091	128	52.3438	191	84.2932	119	21.8487	142	16.9014	178	69.6629
T1C;T26C	76	15.7895	72	20.8333	126	88.0952	112	70.5357	78	20.5128	114	73.6842	110	94.5455	70	30	83	28.9157	149	87.2483
T1C;T26G	111	16.2162	84	17.8571	106	81.1321	96	27.0833	79	27.8481	88	47.7273	125	79.2	71	18.3099	100	23	136	60.2941
T1C;T27A	92	19.5652	88	17.0455	131	79.3893	107	37.3832	76	21.0526	91	38.4615	152	88.1579	97	18.5567	127	13.3858	145	60
T1C;T27C	71	28.169	78	29.4872	112	95.5357	109	70.6422	72	37.5	109	80.7339	157	84.7134	101	49.505	65	46.1538	157	83.4395
T1C;T27G	96	11.4583	67	5.97015	86	43.0233	83	16.8675	74	6.75676	73	13.6986	84	42.8571	69	13.0435	94	12.766	91	32.967
T1C;T28A	85	11.7647	122	14.7541	118	82.2034	102	37.2549	86	20.9302	103	42.7184	147	89.1156	90	13.3333	120	13.3333	149	59.7315
T1C;T28C	65	13.8462	65	10.7692	86	73.2558	70	24.2857	64	20.3125	73	42.4658	112	72.3214	76	17.1053	82	7.31707	117	63.2479
T1C;T28G	83	20.4819	84	15.4762	83	51.8072	94	18.0851	77	12.987	62	17.7419	71	50.7042	81	11.1111	101	13.8614	96	41.6667
T1C;T29A	114	9.64912	80	16.25	139	74.1007	90	24.4444	59	11.8644	89	48.3146	162	79.6296	96	18.75	122	7.37705	140	59.2857
T1C;T29C	79	35.443	84	30.9524	113	85.8407	139	74.8201	98	51.0204	122	83.6066	135	86.6667	116	66.3793	119	49.5798	130	84.6154
T1C;T29G	90	7.77778	64	21.875	79	49.3671	90	15.5556	68	8.82353	77	20.7792	96	51.0417	87	10.3448	93	10.7527	112	30.3571
T1C;C30A	97	10.3093	104	8.65385	93	68.8172	104	20.1923	77	11.6883	89	14.6067	112	76.7857	99	13.1313	102	20.5882	92	46.7391
T1C;C30G	94	10.6383	65	3.07692	91	64.8352	102	18.6275	68	7.35294	62	30.6452	101	73.2673	77	20.7792	104	11.5385	98	56.1224
T1C;C30T	124	15.3226	131	9.16031	139	80.5755	123	37.3984	111	15.3153	128	50	156	89.7436	103	16.5049	105	18.0952	139	66.9065
T1C;C31A	75	8	86	6.97674	45	53.3333	71	7.04225	80	3.75	88	23.8636	54	59.2593	71	18.3099	110	12.7273	83	49.3976
T1C;C31G	64	10.9375	62	6.45161	71	60.5634	83	12.0482	59	8.47458	60	23.3333	89	71.9101	64	9.375	90	15.5556	78	39.7436
T1C;C31T	73	15.0685	71	8.4507	94	68.0851	124	19.3548	81	9.87654	78	42.3077	82	78.0488	96	20.8333	115	14.7826	111	55.8559
T1C;C32A	116	12.069	113	17.6991	125	87.2	148	45.2703	92	20.6522	116	69.8276	155	91.6129	90	34.4444	121	18.1818	158	90.5063
T1C;C32G	73	12.3288	85	28.2353	70	84.2857	129	74.4186	78	29.4872	77	71.4286	77	90.9091	104	49.0385	95	25.2632	109	83.4862
T1C;C32T	106	16.0377	101	26.7327	121	90.9091	132	65.1515	87	21.8391	119	68.0672	125	87.2	116	27.5862	111	12.6126	151	81.457
T1C;T33A	88	18.1818	100	22	161	91.3043	150	58	77	25.974	121	73.5537	175	94.2857	143	32.1678	123	26.0163	159	83.6478
T1C;T33C	101	25.7426	90	16.6667	140	87.1429	136	66.1765	74	31.0811	109	62.3853	139	84.1727	84	40.4762	104	29.8077	124	78.2258
T1C;T33G	112	30.3571	114	27.193	82	46.3415	74	27.027	69	28.9855	87	19.5402	90	41.1111	85	18.8235	93	27.957	76	43.4211
T1C;C34A	98	15.3061	100	21	145	91.0345	154	53.2468	89	20.2247	132	66.6667	169	91.716	103	33.0097	133	18.0451	194	86.5979
T1C;C34G	114	21.9298	114	21.0526	138	86.2319	142	64.7887	94	34.0426	133	76.6917	184	90.7609	122	44.2623	124	33.871	190	90
T1C;C34T	118	18.6441	119	19.3277	166	86.1446	156	53.8462	138	16.6667	155	70.9677	185	87.5676	113	35.3982	149	18.7919	193	84.9741
T1C;T35A	85	12.9412	77	24.6753	119	90.7563	131	63.3588	95	25.2632	106	67.9245	122	91.8033	98	28.5714	108	19.4444	163	76.6871
T1C;T35C	78	14.1026	88	19.3182	141	87.9433	137	59.1241	96	30.2083	137	75.1825	128	89.8438	106	46.2264	121	21.4876	162	80.2469
T1C;T35G	82	14.6341	72	20.8333	84	82.1429	103	34.9515	94	13.8298	104	50	147	85.034	80	18.75	99	16.1616	118	71.1864
T1C;T36A	77	15.5844	92	20.6522	89	88.764	112	52.6786	76	21.0526	104	54.8077	105	83.8095	78	37.1795	88	21.5909	94	85.1064
T1C;T36C	75	6.66667	94	7.44681	48	39.5833	81	20.9877	50	2	57	12.2807	50	34	80	10	78	8.97436	72	41.6667
T1C;T36G	102	22.549	81	33.3333	81	88.8889	124	77.4194	69	53.6232	97	84.5361	122	87.7049	108	68.5185	99	38.3838	143	92.3077
T1C;T37A	93	13.9785	87	12.6437	99	84.8485	118	51.6949	62	25.8065	79	45.5696	86	81.3953	90	27.7778	104	12.5	123	72.3577
T1C;T37C	65	18.4615	101	21.7822	85	82.3529	88	46.5909	57	29.8246	89	59.5506	76	75	97	23.7113	84	28.5714	88	68.1818
T1C;T37G	86	16.2791	92	13.0435	104	86.5385	153	70.5882	74	35.1351	117	81.1966	92	91.3043	91	58.2418	111	32.4324	146	84.2466
T1C;C38A	107	9.34579	89	14.6067	91	85.7143	108	46.2963	82	18.2927	93	66.6667	103	75.7282	100	27	101	20.7921	113	66.3717
T1C;C38G	90	17.7778	83	14.4578	89	89.8876	122	42.623	71	16.9014	90	60	99	79.798	105	29.5238	120	20	113	82.3009
T1C;C38T	88	11.3636	81	22.2222	79	82.2785	124	48.3871	88	22.7273	77	51.9481	82	86.5854	73	27.3973	110	23.6364	96	70.8333
T1C;A39C	85	17.6471	107	20.5607	114	82.4561	118	69.4915	74	29.7297	109	64.2202	110	81.8182	87	29.8851	121	33.0579	154	83.1169
T1C;A39G	95	16.8421	112	9.82143	82	75.6098	99	42.4242	61	19.6721	99	63.6364	88	80.6818	96	19.7917	116	12.069	102	59.8039
T1C;A39T	100	15	104	12.5	110	82.7273	143	39.8601	76	26.3158	106	61.3208	152	73.0263	106	21.6981	117	18.8034	143	83.9161
T1C;T40A	98	12.2449	90	15.5556	106	79.2453	107	51.4019	78	21.7949	110	49.0909	123	82.9268	111	21.6216	143	23.7762	143	73.4266
T1C;T40C	86	12.7907	93	12.9032	96	87.5	120	52.5	81	17.284	79	77.2152	88	80.6818	84	44.0476	107	14.0187	134	82.8358
T1C;T40G	73	16.4384	77	10.3896	96	73.9583	99	30.303	73	10.9589	61	39.3443	91	74.7253	81	18.5185	82	13.4146	106	65.0943
T1C;T41A	104	16.3462	87	21.8391	91	79.1209	113	54.8673	84	27.381	91	67.033	93	84.9462	84	39.2857	118	33.0508	123	82.1138
T1C;T41C	67	23.8806	78	16.6667	82	82.9268	94	39.3617	73	17.8082	82	63.4146	105	87.619	71	23.9437	78	19.2308	89	65.1685
T1C;T41G	77	10.3896	72	4.16667	86	56.9767	84	16.6667	81	11.1111	60	25	66	68.1818	77	16.8831	113	8.84956	87	45.977
T1C;G42A	99	14.1414	109	17.4312	100	83	111	41.4414	106	18.8679	122	53.2787	92	78.2609	75	25.3333	117	17.9487	107	74.7664
T1C;G42C	92	14.1304	98	17.3469	90	76.6667	129	48.062	114	26.3158	110	69.0909	109	79.8165	95	27.3684	118	17.7966	128	78.9062
T1C;G42T	102	19.6078	112	13.3929	99	80.8081	150	42.6667	101	27.7228	110	60	123	83.7398	125	31.2	139	25.1799	152	78.9474
T1C;C43A	100	8	104	15.3846	99	75.7576	122	29.5082	82	17.0732	110	39.0909	121	75.2066	102	10.7843	103	11.6505	128	58.5938
T1C;C43G	65	3.07692	74	12.1622	73	39.726	83	15.6627	77	7.79221	73	10.9589	83	45.7831	76	10.5263	76	6.57895	81	16.0494
T1C;C43T	110	15.4545	130	16.9231	88	73.8636	103	62.1359	87	18.3908	108	59.2593	122	81.9672	111	23.4234	126	19.0476	132	84.0909
T1C;G44A	105	4.7619	129	8.52713	96	37.5	142	16.1972	116	11.2069	116	13.7931	118	32.2034	108	10.1852	128	11.7188	111	14.4144
T1C;G44C	94	21.2766	105	14.2857	121	90.0826	111	54.0541	94	26.5957	107	55.1402	151	79.4702	119	26.8908	112	14.2857	134	78.3582
T1C;G44T	118	15.2542	148	8.10811	111	63.0631	100	25	126	14.2857	140	32.8571	114	73.6842	120	20.8333	144	14.5833	134	41.0448
T1C;C45A	84	10.7143	109	2.75229	66	10.6061	87	3.44828	78	6.41026	61	3.27869	83	15.6627	104	6.73077	112	8.03571	104	5.76923
T1C;C45G	98	13.2653	95	12.6316	61	32.7869	75	8	84	9.52381	78	7.69231	66	51.5152	66	12.1212	93	11.828	83	24.0964
T1C;C45T	117	11.1111	134	14.1791	98	75.5102	102	37.2549	92	30.4348	86	48.8372	92	72.8261	106	21.6981	123	20.3252	119	68.0672
T1C;G46A	119	45.3782	152	59.8684	109	83.4862	152	88.1579	133	83.4586	100	84	104	92.3077	132	81.8182	137	77.3723	141	87.234
T1C;G46C	120	20	110	12.7273	128	73.4375	104	24.0385	100	15	95	38.9474	132	72.7273	125	20	145	13.7931	154	43.5065
T1C;G46T	131	39.6947	108	59.2593	75	66.6667	104	56.7308	81	55.5556	75	54.6667	106	75.4717	104	33.6538	134	44.0299	109	78.8991
T1C;G47A	113	24.7788	104	34.6154	91	58.2418	88	57.9545	52	34.6154	108	39.8148	129	72.093	105	34.2857	119	27.7311	91	53.8462
T1C;G47C	101	21.7822	68	23.5294	75	62.6667	82	37.8049	80	27.5	79	32.9114	113	54.8673	102	28.4314	106	25.4717	114	50.8772
T1C;G47T	121	40.4959	134	37.3134	116	67.2414	128	40.625	80	27.5	97	45.3608	134	67.1642	139	38.1295	146	32.8767	144	53.4722
T1C;G48A	85	12.9412	90	15.5556	84	28.5714	108	18.5185	82	12.1951	98	16.3265	95	25.2632	98	12.2449	137	10.9489	111	18.9189
T1C;G48C	85	28.2353	94	36.1702	67	38.806	100	43	96	43.75	97	42.268	84	50	88	30.6818	121	34.7107	121	43.8017
T1C;G48T	96	21.875	138	20.2899	102	51.9608	121	32.2314	103	32.0388	116	38.7931	105	56.1905	106	15.0943	154	23.3766	133	43.609
T1C;G49A	112	14.2857	107	12.1495	71	23.9437	131	9.92366	72	16.6667	108	24.0741	86	38.3721	87	8.04598	120	11.6667	118	19.4915
T1C;G49C	103	9.70874	102	6.86275	48	6.25	107	3.73832	99	6.06061	102	4.90196	83	20.4819	90	3.33333	104	8.65385	96	12.5
T1C;G49T	102	10.7843	113	7.9646	94	7.44681	121	4.95868	96	5.20833	87	9.1954	99	14.1414	111	5.40541	122	4.91803	115	5.21739
T1C;A50C	88	5.68182	90	6.66667	58	13.7931	67	2.98507	86	13.9535	71	4.22535	64	10.9375	77	2.5974	98	5.10204	99	7.07071
T1C;A50G	83	22.8916	90	20	78	38.4615	84	19.0476	71	25.3521	81	24.6914	89	62.9213	95	21.0526	123	24.3902	113	56.6372
T1C;A50T	95	5.26316	104	11.5385	62	12.9032	112	9.82143	88	11.3636	66	13.6364	87	11.4943	89	8.98876	118	11.0169	73	4.10959
T1C;C51A	73	20.5479	129	27.1318	64	32.8125	106	36.7925	84	29.7619	82	28.0488	89	60.6742	100	29	131	29.0076	106	28.3019
T1C;C51G	102	20.5882	82	23.1707	72	22.2222	90	26.6667	69	27.5362	75	28	73	31.5068	104	18.2692	102	18.6275	93	22.5806
T1C;C51T	98	25.5102	114	22.807	88	47.7273	88	23.8636	91	31.8681	85	40	100	74	91	27.4725	132	31.0606	92	53.2609
T1C;G52A	100	32	116	31.8966	86	47.6744	124	44.3548	85	28.2353	107	44.8598	103	65.0485	88	26.1364	117	28.2051	111	59.4595
T1C;G52C	77	15.5844	92	20.6522	88	53.4091	104	47.1154	70	21.4286	85	37.6471	96	54.1667	111	24.3243	86	30.2326	95	48.4211
T1C;G52T	100	26	111	31.5315	84	36.9048	101	48.5149	91	38.4615	103	33.9806	90	42.2222	100	27	126	33.3333	100	36
T1C;A53C	90	12.2222	104	9.61538	72	22.2222	86	15.1163	72	12.5	70	7.14286	88	26.1364	86	11.6279	88	14.7727	70	20
T1C;A53G	83	8.43373	69	5.7971	82	58.5366	103	17.4757	76	10.5263	80	25	85	57.6471	96	8.33333	69	10.1449	75	41.3333
T1C;A53T	110	13.6364	82	8.53659	62	9.67742	93	5.37634	76	10.5263	69	15.942	73	12.3288	72	9.72222	118	6.77966	75	12
T1C;C54A	101	24.7525	104	12.5	69	36.2319	86	19.7674	84	17.8571	88	13.6364	77	38.961	96	15.625	117	21.3675	107	18.6916
T1C;C54G	88	43.1818	105	32.381	69	33.3333	83	38.5542	75	29.3333	75	37.3333	98	39.7959	102	33.3333	113	34.5133	90	35.5556
T1C;C54T	81	16.0494	99	6.06061	52	21.1538	111	7.20721	71	14.0845	90	11.1111	86	10.4651	96	3.125	121	9.91736	101	12.8713
T1C;C55A	78	14.1026	73	12.3288	56	46.4286	94	27.6596	76	13.1579	68	23.5294	73	43.8356	62	11.2903	74	12.1622	84	34.5238
T1C;C55G	74	32.4324	73	36.9863	57	36.8421	78	29.4872	58	36.2069	54	27.7778	71	57.7465	63	31.746	63	30.1587	78	42.3077
T1C;C55T	93	13.9785	94	14.8936	100	75	86	53.4884	82	21.9512	102	49.0196	109	83.4862	96	34.375	115	14.7826	131	57.2519
T1C;C56A	93	4.30108	82	13.4146	64	53.125	91	24.1758	70	4.28571	81	14.8148	98	65.3061	89	19.1011	99	19.1919	83	28.9157
T1C;C56G	73	12.3288	102	11.7647	61	11.4754	86	6.97674	71	15.493	79	25.3165	49	46.9388	73	8.21918	92	10.8696	55	21.8182
T1C;C56T	111	13.5135	110	10.9091	91	57.1429	98	28.5714	86	13.9535	99	27.2727	113	58.4071	88	10.2273	122	17.2131	139	37.4101
T1C;T57A	68	13.2353	103	11.6505	67	58.209	117	14.5299	96	14.5833	95	30.5263	91	56.044	100	14	112	8.03571	110	36.3636
T1C;T57C	118	17.7966	123	12.1951	91	83.5165	118	46.6102	98	16.3265	93	70.9677	83	85.5422	113	23.0088	113	19.469	134	79.8507
T1C;T57G	83	8.43373	70	14.2857	66	51.5152	104	40.3846	89	13.4831	74	28.3784	73	63.0137	76	17.1053	90	16.6667	83	44.5783
T1C;G58A	83	21.6867	106	20.7547	84	77.381	93	51.6129	72	37.5	95	64.2105	122	80.3279	92	39.1304	93	32.2581	124	81.4516
T1C;G58C	84	22.619	77	31.1688	76	76.3158	99	55.5556	68	27.9412	90	60	81	85.1852	69	57.971	98	19.3878	107	76.6355
T1C;G58T	97	20.6186	100	17	97	72.1649	129	44.186	82	20.7317	109	55.0459	135	79.2593	126	31.746	141	25.5319	140	72.1429
T1C;C59A	81	13.5802	101	33.6634	112	86.6071	100	62	61	37.7049	98	67.3469	104	81.7308	86	34.8837	64	20.3125	134	77.6119
T1C;C59G	84	19.0476	71	18.3099	70	72.8571	100	61	61	22.9508	63	65.0794	67	74.6269	79	35.443	78	17.9487	107	80.3738
T1C;C59T	94	22.3404	89	25.8427	109	74.3119	114	76.3158	86	48.8372	109	77.0642	119	84.0336	99	43.4343	103	36.8932	134	82.8358
T1C;A60C	83	12.0482	109	10.0917	103	72.8155	110	38.1818	69	20.2899	81	39.5062	107	85.9813	83	26.506	109	19.2661	108	72.2222
T1C;A60G	75	9.33333	91	12.0879	77	77.9221	90	54.4444	67	16.4179	61	59.0164	82	81.7073	83	31.3253	100	22	93	76.3441
T1C;A60T	90	10	91	13.1868	99	50.5051	105	11.4286	85	12.9412	99	25.2525	93	44.086	82	12.1951	103	12.6214	76	50
T1C;G61A	109	5.50459	129	20.155	94	82.9787	111	61.2613	93	39.7849	98	67.3469	117	83.7607	109	56.8807	115	33.913	115	80.8696
T1C;G61C	110	10.9091	112	19.6429	120	83.3333	122	68.0328	104	32.6923	121	75.2066	125	68	111	39.6396	141	24.1135	137	77.3723
T1C;G61T	87	9.1954	114	21.9298	119	84.8739	174	51.1494	97	36.0825	129	71.3178	137	84.6715	109	32.1101	155	33.5484	145	73.7931
T1C;A62C	70	24.2857	88	29.5455	109	92.6606	140	77.8571	87	49.4253	113	84.9558	120	91.6667	116	69.8276	98	33.6735	155	89.0323
T1C;A62G	86	27.907	85	41.1765	69	78.2609	95	60	75	48	87	65.5172	81	79.0123	72	34.7222	91	45.0549	85	74.1176
T1C;A62T	100	14	102	16.6667	106	70.7547	108	37.037	91	19.7802	91	41.7582	117	72.6496	94	27.6596	100	22	113	63.7168
T1C;G63A	120	11.6667	121	13.2231	151	75.4967	151	18.543	114	14.9123	124	39.5161	153	79.7386	108	13.8889	134	8.20896	144	52.7778
T1C;G63C	92	8.69565	100	7	117	80.3419	100	23	86	5.81395	114	30.7018	162	77.7778	109	20.1835	115	11.3043	135	71.1111
T1C;G63T	103	14.5631	121	12.3967	215	93.4884	145	65.5172	91	14.2857	192	75.5208	247	94.332	142	29.5775	137	12.4088	225	88
T1C;A64C	91	9.89011	74	13.5135	109	77.9817	76	28.9474	70	18.5714	66	40.9091	96	76.0417	67	11.9403	106	9.43396	110	61.8182
T1C;A64G	71	29.5775	75	38.6667	91	89.011	123	73.1707	67	40.2985	90	73.3333	105	86.6667	98	52.0408	94	44.6809	130	90
T1C;A64T	77	10.3896	86	11.6279	109	86.2385	95	35.7895	68	19.1176	95	74.7368	142	88.7324	98	20.4082	104	9.61538	115	81.7391
T1C;G65A	97	12.3711	126	23.8095	181	94.4751	205	95.122	135	74.8148	165	89.697	208	96.1538	203	81.2808	153	43.7908	217	94.9309
T1C;G65C	66	12.1212	97	18.5567	129	94.5736	124	81.4516	78	50	122	90.1639	137	92.7007	81	80.2469	78	11.5385	129	88.3721
T1C;G65T	85	22.3529	109	23.8532	141	91.4894	206	88.3495	137	85.4015	169	90.5325	172	91.8605	181	84.5304	155	43.2258	174	91.954
T1C;G66A	71	32.3944	108	45.3704	108	95.3704	143	93.7063	138	87.6812	115	92.1739	121	92.562	130	86.9231	145	66.2069	147	89.1156
T1C;G66C	99	19.1919	62	16.129	103	87.3786	129	79.0698	57	43.8596	135	85.9259	128	90.625	104	61.5385	104	16.3462	120	92.5
T1C;G66T	107	54.2056	144	67.3611	129	90.6977	135	97.037	115	93.913	143	86.014	123	91.8699	169	89.9408	173	84.3931	160	93.125
T1C;C67A	80	33.75	106	61.3208	92	81.5217	77	80.5195	93	82.7957	81	77.7778	77	93.5065	95	83.1579	128	68.75	103	85.4369
T1C;C67G	84	13.0952	84	22.619	45	75.5556	77	63.6364	81	19.7531	64	57.8125	66	72.7273	87	47.1264	111	18.018	82	79.2683
T1C;C67T	96	28.125	114	42.1053	78	85.8974	94	75.5319	73	58.9041	66	81.8182	65	84.6154	85	69.4118	104	58.6538	77	92.2078
T1C;T68A	62	56.4516	94	74.4681	83	92.7711	97	88.6598	80	90	79	84.8101	77	90.9091	110	80.9091	136	78.6765	109	94.4954
T1C;T68C	75	46.6667	83	60.241	73	79.4521	93	88.172	75	85.3333	89	87.6404	78	76.9231	82	85.3659	102	78.4314	87	87.3563
T1C;T68G	88	7.95455	85	11.7647	52	67.3077	93	54.8387	83	24.0964	74	67.5676	52	76.9231	98	28.5714	112	15.1786	61	62.2951
T1C;G69A	170	77.0588	206	90.2913	143	88.1119	179	92.1788	186	89.2473	131	91.6031	149	95.9732	176	84.0909	249	88.755	173	92.4855
T1C;G69C	79	84.8101	146	91.0959	91	97.8022	117	88.8889	112	87.5	113	86.7257	109	95.4128	148	89.1892	128	87.5	114	93.8596
T1C;G69T	157	90.4459	160	95	129	93.7984	153	89.5425	115	92.1739	140	90	128	96.875	149	89.2617	196	91.3265	134	94.7761
T1C;A70C	63	60.3175	70	78.5714	91	91.2088	98	95.9184	105	88.5714	105	90.4762	94	95.7447	107	91.5888	76	77.6316	114	90.3509
T1C;A70G	111	22.5225	93	34.4086	76	90.7895	96	75	75	38.6667	101	77.2277	101	94.0594	92	54.3478	82	35.3659	112	87.5
T1C;A70T	95	45.2632	118	60.1695	126	92.8571	145	90.3448	89	61.7978	127	91.3386	134	96.2687	112	75	111	54.955	153	94.7712
T1C;A71C	84	29.7619	93	43.0108	129	93.0233	162	76.5432	90	53.3333	156	89.7436	178	93.2584	142	64.0845	107	42.9907	178	92.6966
T1C;A71G	85	18.8235	87	26.4368	151	92.053	161	85.7143	95	54.7368	130	83.0769	155	94.8387	119	62.1849	142	40.8451	180	96.1111
T1C;A71T	84	17.8571	70	18.5714	142	92.2535	134	74.6269	90	43.3333	152	78.2895	152	86.8421	102	47.0588	101	15.8416	176	84.0909
T1C;A72C	74	24.3243	104	12.5	137	83.9416	108	52.7778	77	19.4805	122	70.4918	145	91.0345	108	43.5185	84	22.619	157	78.9809
T1C;A72G	74	8.10811	79	10.1266	104	54.8077	102	13.7255	75	1.33333	75	25.3333	99	76.7677	85	12.9412	94	4.25532	117	47.8632
T1C;A72T	79	13.9241	91	28.5714	118	88.1356	157	57.9618	75	32	125	78.4	149	92.6174	105	47.619	100	26	161	85.7143
T1G;T2A	116	15.5172	112	21.4286	108	87.037	142	47.8873	108	28.7037	124	54.8387	121	78.5124	128	30.4688	90	18.8889	134	85.8209
T1G;T2C	82	34.1463	64	34.375	54	72.2222	77	45.4545	83	39.759	64	46.875	71	78.8732	70	27.1429	82	34.1463	88	62.5
T1G;T2G	88	18.1818	81	16.0494	57	57.8947	68	19.1176	59	15.2542	58	31.0345	76	57.8947	94	7.44681	91	14.2857	88	34.0909
T1G;T3A	100	40	106	42.4528	78	84.6154	139	58.9928	101	56.4356	78	64.1026	84	83.3333	107	52.3364	112	46.4286	94	78.7234
T1G;T3C	91	78.022	77	63.6364	43	55.814	88	65.9091	66	77.2727	54	64.8148	50	86	62	70.9677	101	68.3168	46	71.7391
T1G;T3G	111	55.8559	109	60.5505	95	84.2105	128	69.5312	97	63.9175	100	77	114	85.0877	99	52.5253	133	60.1504	111	88.2883
T1G;C4A	195	63.5897	168	72.619	123	82.1138	183	78.6885	131	72.5191	119	79.8319	120	88.3333	151	66.8874	200	75	136	86.0294
T1G;C4G	216	68.9815	197	69.0355	149	70.4698	174	76.4368	159	72.956	135	71.8519	126	75.3968	167	67.0659	206	74.2718	130	77.6923
T1G;C4T	198	39.899	209	39.7129	142	72.5352	198	53.0303	160	46.25	163	49.6933	161	73.2919	184	41.3043	238	48.3193	179	68.1564
T1G;A5C	64	64.0625	87	77.0115	40	82.5	110	78.1818	66	75.7576	50	70	67	70.1493	73	60.274	97	63.9175	61	59.0164
T1G;A5G	65	29.2308	64	48.4375	39	43.5897	59	33.8983	44	47.7273	56	33.9286	38	50	55	38.1818	79	45.5696	45	46.6667
T1G;A5T	27	3.7037	34	23.5294	11	54.5455	11	36.3636	15	6.66667	17	41.1765	7	14.2857	24	25	35	20	15	60
T1G;G6A	201	75.1244	193	81.3472	113	86.7257	160	82.5	162	79.6296	137	76.6423	141	89.3617	153	67.9739	209	78.9474	174	83.908
T1G;G6C	140	74.2857	180	82.7778	103	66.0194	161	80.1242	133	84.2105	117	76.0684	115	73.913	148	75	183	85.2459	103	85.4369
T1G;G6T	155	68.3871	154	75.3247	118	85.5932	176	78.9773	120	82.5	102	68.6275	128	85.9375	127	70.8661	164	67.6829	124	81.4516
T1G;C7A	182	70.8791	188	75.5319	115	77.3913	150	74	137	82.4818	136	72.7941	142	80.2817	148	66.8919	193	69.9482	129	84.4961
T1G;C7G	118	64.4068	142	79.5775	94	72.3404	120	70.8333	108	75	101	72.2772	100	82	120	68.3333	133	68.4211	120	75.8333
T1G;C7T	144	63.1944	187	71.123	114	77.193	142	63.3803	138	65.2174	114	73.6842	155	80	146	61.6438	178	58.9888	131	75.5725
T1G;C8A	194	72.1649	220	78.1818	162	87.6543	203	79.803	177	81.9209	157	80.2548	160	88.125	186	65.0538	226	74.7788	161	88.1988
T1G;C8G	116	81.8966	127	80.315	84	89.2857	129	81.3953	110	79.0909	95	81.0526	95	82.1053	102	69.6078	121	73.5537	118	77.9661
T1G;C8T	195	67.6923	187	70.5882	135	85.9259	199	73.3668	153	73.8562	158	75.3165	165	81.8182	187	57.2193	195	70.2564	168	84.5238
T1G;G9A	122	11.4754	129	11.6279	109	33.0275	148	18.2432	116	12.069	113	23.0088	104	37.5	132	10.6061	150	12.6667	125	20.8
T1G;G9C	102	10.7843	119	15.9664	94	15.9574	119	10.9244	101	10.8911	119	15.9664	75	18.6667	134	12.6866	119	10.9244	89	22.4719
T1G;G9T	86	8.13953	92	3.26087	53	26.4151	94	18.0851	61	3.27869	80	7.5	55	27.2727	98	9.18367	104	7.69231	83	9.63855
T1G;G10A	147	38.7755	149	39.5973	121	55.3719	172	29.6512	114	35.0877	127	37.7953	118	54.2373	137	28.4672	152	30.9211	146	47.9452
T1G;G10C	126	52.381	115	46.087	80	45	118	46.6102	78	55.1282	88	52.2727	78	48.7179	87	47.1264	109	53.211	97	48.4536
T1G;G10T	108	8.33333	113	15.9292	84	17.8571	116	7.75862	98	16.3265	95	10.5263	99	45.4545	92	7.6087	123	17.8862	93	19.3548
T1G;A11C	73	34.2466	72	34.7222	47	17.0213	69	26.087	57	36.8421	64	26.5625	52	34.6154	65	29.2308	88	30.6818	69	14.4928
T1G;A11G	103	52.4272	112	66.9643	75	82.6667	88	62.5	80	68.75	93	74.1935	77	83.1169	116	43.9655	122	45.9016	109	78.8991
T1G;A11T	78	3.84615	67	13.4328	58	18.9655	72	8.33333	64	6.25	49	0	60	18.3333	60	5	96	14.5833	60	18.3333
T1G;A12C	54	11.1111	64	12.5	46	13.0435	89	13.4831	55	9.09091	64	3.125	55	16.3636	60	3.33333	77	7.79221	68	14.7059
T1G;A12G	113	19.469	93	29.0323	60	55	95	28.4211	78	25.641	66	43.9394	83	60.241	93	34.4086	96	35.4167	81	50.6173
T1G;A12T	81	6.17284	69	4.34783	59	6.77966	96	10.4167	77	11.6883	64	3.125	65	13.8462	93	9.67742	118	7.62712	71	15.493
T1G;G13A	116	47.4138	172	63.3721	106	71.6981	134	73.8806	128	64.0625	120	65.8333	113	77.8761	117	64.9573	192	66.1458	129	76.7442
T1G;G13C	82	12.1951	101	23.7624	74	40.5405	77	31.1688	74	29.7297	65	43.0769	67	47.7612	77	25.974	105	33.3333	65	44.6154
T1G;G13T	98	29.5918	107	39.2523	62	41.9355	73	41.0959	85	42.3529	65	56.9231	77	61.039	92	35.8696	117	44.4444	101	54.4554
T1G;C14A	171	73.6842	136	86.0294	92	73.913	184	81.5217	141	83.6879	127	81.8898	120	75	135	74.0741	197	82.2335	130	86.1538
T1G;C14G	175	80.5714	103	82.5243	70	72.8571	152	81.5789	104	83.6538	97	79.3814	73	54.7945	134	72.3881	142	79.5775	91	73.6264
T1G;C14T	133	66.1654	88	40.9091	63	36.5079	108	50	65	53.8462	84	47.619	104	39.4231	99	44.4444	102	50.9804	65	58.4615
T1G;G15A	109	10.0917	110	9.09091	91	8.79121	115	13.913	96	6.25	96	6.25	80	7.5	105	13.3333	140	5.71429	127	6.29921
T1G;G15C	78	38.4615	97	50.5155	65	44.6154	92	41.3043	76	34.2105	69	42.029	75	49.3333	67	43.2836	99	44.4444	63	50.7937
T1G;G15T	110	22.7273	118	23.7288	98	25.5102	118	26.2712	102	29.4118	96	20.8333	76	31.5789	107	20.5607	115	20.8696	104	30.7692
T1G;G16A	83	6.0241	75	6.66667	74	6.75676	106	7.54717	91	4.3956	78	3.84615	94	12.766	72	4.16667	100	9	79	5.06329
T1G;G16C	73	38.3562	70	35.7143	62	37.0968	105	54.2857	55	38.1818	64	43.75	58	32.7586	81	41.9753	102	57.8431	74	39.1892
T1G;G16T	79	20.2532	101	18.8119	58	17.2414	86	25.5814	75	20	88	25	79	26.5823	77	14.2857	116	29.3103	103	13.5922
T1G;G17A	125	29.6	109	35.7798	82	31.7073	128	42.1875	101	41.5842	92	42.3913	89	37.0787	110	30.9091	135	38.5185	129	45.7364
T1G;G17C	79	58.2278	97	73.1959	71	69.0141	104	70.1923	65	61.5385	77	74.026	84	70.2381	118	46.6102	135	67.4074	92	61.9565
T1G;G17T	101	35.6436	108	39.8148	82	28.0488	118	44.9153	84	35.7143	74	36.4865	82	50	113	32.7434	104	34.6154	93	43.0108
T1G;A18C	99	12.1212	73	16.4384	65	10.7692	95	5.26316	87	12.6437	70	14.2857	64	20.3125	84	14.2857	89	10.1124	65	13.8462
T1G;A18G	138	18.1159	111	20.7207	71	21.1268	138	15.942	77	16.8831	113	11.5044	96	12.5	114	14.9123	123	17.0732	94	20.2128
T1G;A18T	60	6.66667	38	2.63158	45	11.1111	65	4.61538	42	11.9048	57	14.0351	46	4.34783	38	0	51	5.88235	45	6.66667
T1G;C19A	159	66.0377	131	69.4656	100	65	133	69.9248	117	73.5043	114	72.807	86	73.2558	133	60.1504	169	69.8225	130	66.1538
T1G;C19G	88	44.3182	86	37.2093	63	26.9841	104	49.0385	75	37.3333	92	42.3913	72	44.4444	88	42.0455	99	35.3535	89	39.3258
T1G;C19T	90	41.1111	84	45.2381	54	33.3333	94	47.8723	75	40	64	31.25	67	34.3284	86	27.907	84	27.381	80	41.25
T1G;G20A	146	63.0137	169	71.5976	137	65.6934	170	71.1765	140	72.1429	134	77.6119	137	70.073	186	51.0753	190	61.5789	172	71.5116
T1G;G20C	146	30.8219	145	43.4483	81	23.4568	127	37.7953	132	39.3939	118	32.2034	115	24.3478	123	30.8943	152	32.8947	123	42.2764
T1G;G20T	194	59.7938	188	70.7447	144	68.75	173	66.474	188	64.8936	166	68.0723	138	69.5652	177	54.8023	198	66.1616	179	58.1006
T1G;A21C	87	10.3448	94	17.0213	71	16.9014	62	16.129	99	7.07071	70	12.8571	91	18.6813	106	6.60377	116	12.931	96	13.5417
T1G;A21G	100	34	116	46.5517	78	75.641	106	47.1698	71	56.338	74	62.1622	120	80.8333	90	51.1111	110	50.9091	121	61.9835
T1G;A21T	83	16.8675	82	15.8537	79	24.0506	93	7.52688	64	18.75	68	19.1176	71	18.3099	67	14.9254	109	20.1835	93	15.0538
T1G;C22A	108	42.5926	109	52.2936	82	41.4634	112	39.2857	82	53.6585	97	46.3918	120	38.3333	96	40.625	119	50.4202	115	60
T1G;C22G	64	31.25	50	36	47	23.4043	48	35.4167	58	34.4828	50	44	62	27.4194	50	28	91	34.0659	54	27.7778
T1G;C22T	104	51.9231	101	49.505	75	28	120	50	72	56.9444	81	48.1481	81	22.2222	92	35.8696	118	55.9322	111	36.9369
T1G;C23A	96	64.5833	83	54.2169	38	39.4737	92	52.1739	63	57.1429	57	54.386	77	41.5584	66	50	108	56.4815	79	50.6329
T1G;C23G	60	33.3333	53	64.1509	40	32.5	61	55.7377	66	66.6667	38	55.2632	42	61.9048	64	50	78	64.1026	55	52.7273
T1G;C23T	98	43.8776	95	54.7368	75	40	100	47	62	43.5484	84	38.0952	59	18.6441	94	41.4894	118	52.5424	73	31.5068
T1G;C24A	111	60.3604	66	59.0909	57	40.3509	91	68.1319	71	61.9718	78	38.4615	65	44.6154	95	51.5789	103	63.1068	84	52.381
T1G;C24G	136	66.1765	125	78.4	98	66.3265	133	69.1729	116	78.4483	114	79.8246	122	81.1475	109	66.9725	162	77.1605	106	78.3019
T1G;C24T	130	65.3846	107	60.7477	73	58.9041	93	68.8172	95	67.3684	84	55.9524	101	63.3663	97	63.9175	113	60.177	77	59.7403
T1G;G25A	88	22.7273	105	31.4286	67	25.3731	119	33.6134	115	33.913	113	25.6637	110	34.5455	106	25.4717	128	43.75	106	30.1887
T1G;G25C	130	18.4615	133	21.0526	94	25.5319	132	19.697	111	20.7207	113	20.354	115	29.5652	140	21.4286	170	18.2353	112	24.1071
T1G;G25T	118	31.3559	136	45.5882	99	31.3131	165	34.5455	110	50	119	47.0588	110	42.7273	122	41.8033	141	38.2979	130	43.0769
T1G;T26A	151	43.0464	173	52.0231	167	64.6707	157	45.8599	126	46.0317	125	46.4	172	73.2558	141	35.461	160	40	150	53.3333
T1G;T26C	157	43.3121	116	49.1379	120	80.8333	134	53.7313	89	48.3146	94	61.7021	120	75.8333	95	40	126	42.8571	115	81.7391
T1G;T26G	122	52.459	156	59.6154	113	74.3363	132	54.5455	104	51.9231	134	54.4776	123	69.1057	137	51.8248	161	51.5528	140	53.5714
T1G;T27A	137	28.4672	129	41.8605	137	67.1533	106	33.0189	125	32.8	126	41.2698	137	71.5328	121	27.2727	163	28.2209	159	47.1698
T1G;T27C	100	50	83	43.3735	69	78.2609	83	51.8072	76	46.0526	64	59.375	63	74.6032	73	36.9863	104	44.2308	85	65.8824
T1G;T27G	116	36.2069	102	36.2745	90	33.3333	107	14.9533	96	30.2083	89	25.8427	111	33.3333	104	32.6923	104	26.9231	115	25.2174
T1G;T28A	147	27.2109	140	37.8571	121	66.1157	149	30.8725	113	37.1681	102	32.3529	139	66.9065	135	27.4074	155	36.129	149	51.6779
T1G;T28C	93	32.2581	91	42.8571	57	33.3333	86	20.9302	88	31.8182	84	42.8571	75	52	95	26.3158	84	38.0952	91	41.7582
T1G;T28G	144	68.75	127	77.1654	71	69.0141	109	66.055	114	80.7018	102	71.5686	104	66.3462	99	69.697	131	78.626	101	73.2673
T1G;T29A	106	27.3585	115	20	135	65.1852	121	22.314	98	13.2653	101	41.5842	133	68.4211	112	25.8929	145	22.7586	136	43.3824
T1G;T29C	108	35.1852	119	50.4202	94	86.1702	141	65.9574	86	53.4884	102	61.7647	119	78.1513	92	45.6522	110	53.6364	125	74.4
T1G;T29G	125	17.6	99	21.2121	63	33.3333	102	15.6863	90	26.6667	84	23.8095	95	29.4737	97	18.5567	119	15.1261	72	29.1667
T1G;C30A	114	14.9123	126	17.4603	97	39.1753	128	12.5	95	12.6316	104	23.0769	88	51.1364	107	14.0187	124	12.0968	118	33.8983
T1G;C30G	69	4.34783	90	13.3333	74	24.3243	98	9.18367	81	11.1111	88	15.9091	83	26.506	82	9.7561	101	10.8911	91	27.4725
T1G;C30T	140	21.4286	139	23.741	119	76.4706	144	25.6944	93	23.6559	118	27.1186	160	75	119	17.6471	163	22.0859	151	44.3709
T1G;C31A	109	4.58716	88	10.2273	53	49.0566	90	22.2222	70	18.5714	92	18.4783	61	36.0656	96	11.4583	91	5.49451	69	23.1884
T1G;C31G	78	24.359	89	16.8539	68	54.4118	82	17.0732	65	18.4615	65	33.8462	70	62.8571	86	20.9302	72	11.1111	62	30.6452
T1G;C31T	105	11.4286	98	15.3061	95	64.2105	111	14.4144	93	12.9032	100	26	143	67.8322	103	15.534	134	14.9254	130	28.4615
T1G;C32A	125	20	102	43.1373	114	73.6842	128	40.625	102	30.3922	107	66.3551	120	80	110	28.1818	138	28.2609	134	67.9104
T1G;C32G	70	35.7143	97	54.6392	72	84.7222	85	70.5882	77	53.2468	90	78.8889	79	91.1392	85	54.1176	97	48.4536	98	79.5918
T1G;C32T	121	23.9669	114	33.3333	125	80	141	43.9716	101	25.7426	120	48.3333	152	83.5526	113	27.4336	135	27.4074	121	68.595
T1G;T33A	137	35.7664	175	48	136	83.0882	122	48.3607	116	46.5517	127	46.4567	132	80.303	142	35.2113	141	40.4255	131	68.7023
T1G;T33C	128	39.0625	151	52.9801	124	69.3548	139	48.9209	98	44.898	118	66.9492	112	62.5	121	50.4132	152	51.3158	125	67.2
T1G;T33G	189	82.0106	155	86.4516	108	81.4815	169	83.432	160	86.25	128	78.125	133	81.203	131	78.626	168	78.5714	133	85.7143
T1G;C34A	153	27.451	122	33.6066	151	82.7815	157	43.949	116	32.7586	118	62.7119	166	78.3133	130	26.9231	164	32.3171	164	71.9512
T1G;C34G	176	48.2955	150	48	164	79.878	213	55.3991	142	55.6338	190	71.5789	203	82.266	137	43.7956	209	44.4976	187	73.7968
T1G;C34T	142	21.831	190	25.2632	145	82.7586	144	29.8611	146	21.2329	154	42.2078	193	79.2746	155	27.7419	156	16.6667	205	65.8537
T1G;T35A	99	32.3232	95	50.5263	121	75.2066	110	40	97	29.8969	95	40	164	84.1463	114	41.2281	134	35.8209	134	67.9104
T1G;T35C	97	37.1134	89	43.8202	86	58.1395	109	32.1101	87	41.3793	90	46.6667	84	69.0476	83	36.1446	102	33.3333	81	45.679
T1G;T35G	132	56.8182	152	55.2632	97	60.8247	118	56.7797	118	61.8644	113	52.2124	114	69.2982	113	53.0973	165	51.5152	124	53.2258
T1G;T36A	95	21.0526	119	26.8908	103	78.6408	130	32.3077	93	32.2581	110	47.2727	131	76.3359	114	29.8246	119	26.8908	138	60.1449
T1G;T36C	74	12.1622	77	23.3766	56	30.3571	60	18.3333	60	13.3333	51	11.7647	66	33.3333	61	4.91803	78	20.5128	65	23.0769
T1G;T36G	63	28.5714	81	29.6296	66	83.3333	92	57.6087	70	34.2857	73	63.0137	78	76.9231	66	30.303	89	23.5955	94	84.0426
T1G;T37A	96	20.8333	119	30.2521	91	74.7253	102	32.3529	77	28.5714	115	32.1739	111	82.8829	100	18	127	18.8976	121	68.595
T1G;T37C	131	73.2824	133	69.1729	80	73.75	130	81.5385	104	85.5769	88	71.5909	88	63.6364	92	63.0435	131	74.8092	112	80.3571
T1G;T37G	69	36.2319	94	35.1064	70	52.8571	99	40.404	68	39.7059	65	47.6923	80	58.75	61	29.5082	103	33.9806	78	48.7179
T1G;C38A	125	20	111	20.7207	96	64.5833	129	35.6589	90	23.3333	91	29.6703	97	70.1031	103	24.2718	141	21.2766	108	54.6296
T1G;C38G	89	26.9663	114	28.9474	123	80.4878	96	34.375	89	31.4607	112	46.4286	146	69.1781	100	24	122	33.6066	131	60.3053
T1G;C38T	121	7.43802	122	17.2131	64	71.875	89	23.5955	72	19.4444	78	30.7692	99	60.6061	77	18.1818	124	24.1935	118	56.7797
T1G;A39C	106	40.566	104	38.4615	82	74.3902	92	52.1739	100	46	79	62.0253	79	70.8861	95	38.9474	117	51.2821	96	75
T1G;A39G	169	44.3787	137	50.365	103	60.1942	124	49.1935	104	39.4231	140	44.2857	102	79.4118	140	45.7143	136	52.9412	132	65.1515
T1G;A39T	106	19.8113	126	18.254	82	58.5366	108	39.8148	96	34.375	88	29.5455	110	70.9091	106	23.5849	145	24.1379	127	51.9685
T1G;T40A	107	25.2336	117	35.0427	102	70.5882	118	38.9831	95	38.9474	102	32.3529	90	64.4444	96	25	130	27.6923	114	56.1404
T1G;T40C	92	23.913	107	28.0374	96	73.9583	106	34.9057	80	32.5	79	39.2405	94	80.8511	75	22.6667	103	23.301	123	69.9187
T1G;T40G	87	36.7816	105	38.0952	90	62.2222	100	45	71	36.6197	75	45.3333	88	64.7727	96	26.0417	118	31.3559	125	50.4
T1G;T41A	106	23.5849	102	32.3529	90	81.1111	115	40.8696	97	42.268	96	46.875	111	72.0721	116	28.4483	103	31.068	129	52.7132
T1G;T41C	102	32.3529	81	28.3951	84	69.0476	82	34.1463	68	29.4118	85	34.1176	92	55.4348	90	28.8889	85	29.4118	95	48.4211
T1G;T41G	108	46.2963	100	31	79	56.962	99	36.3636	74	29.7297	72	37.5	82	46.3415	97	26.8041	106	30.1887	90	30
T1G;G42A	117	16.2393	104	24.0385	92	71.7391	138	28.2609	96	25	94	37.234	108	69.4444	112	26.7857	147	23.1293	128	47.6562
T1G;G42C	132	25.7576	102	35.2941	112	66.9643	117	35.0427	84	28.5714	107	37.3832	112	64.2857	98	36.7347	135	22.963	120	62.5
T1G;G42T	124	20.9677	160	21.875	122	63.1148	189	27.5132	134	26.8657	152	38.8158	116	67.2414	151	18.543	193	30.0518	140	57.8571
T1G;C43A	101	16.8317	133	18.0451	107	42.9907	93	17.2043	92	17.3913	84	15.4762	93	37.6344	121	12.3967	134	11.194	114	28.0702
T1G;C43G	105	17.1429	102	25.4902	78	16.6667	104	15.3846	82	12.1951	97	19.5876	88	23.8636	73	10.9589	104	17.3077	68	25
T1G;C43T	127	17.3228	126	14.2857	81	54.321	115	30.4348	85	18.8235	95	37.8947	100	57	113	21.2389	124	22.5806	124	57.2581
T1G;G44A	142	9.15493	123	10.5691	88	21.5909	166	14.4578	99	13.1313	101	16.8317	94	26.5957	124	6.45161	156	17.3077	102	7.84314
T1G;G44C	210	73.8095	188	75	117	68.3761	180	78.8889	163	72.3926	172	67.4419	142	71.1268	170	66.4706	216	69.4444	164	72.561
T1G;G44T	178	42.6966	173	39.8844	103	41.7476	134	54.4776	113	48.6726	134	41.791	142	50	138	31.1594	159	42.7673	144	44.4444
T1G;C45A	131	35.1145	116	26.7241	75	22.6667	139	33.8129	92	31.5217	112	24.1071	93	23.6559	105	20.9524	120	31.6667	124	26.6129
T1G;C45G	101	12.8713	103	17.4757	69	20.2899	96	19.7917	80	17.5	75	16	79	29.1139	98	14.2857	118	15.2542	88	11.3636
T1G;C45T	80	27.5	118	38.9831	98	43.8776	118	48.3051	114	42.9825	108	37.963	122	49.1803	110	33.6364	141	35.461	98	46.9388
T1G;G46A	100	27	139	44.6043	70	78.5714	144	70.8333	118	44.0678	100	85	104	72.1154	112	46.4286	124	45.1613	126	80.1587
T1G;G46C	284	79.5775	246	77.2358	112	76.7857	219	73.0594	160	78.125	166	74.6988	145	75.1724	206	73.301	276	82.6087	190	70.5263
T1G;G46T	156	72.4359	140	77.8571	88	71.5909	142	76.7606	146	81.5068	120	78.3333	107	74.7664	119	70.5882	165	73.9394	117	75.2137
T1G;G47A	191	71.7277	153	63.3987	91	45.0549	121	70.2479	138	72.4638	100	66	111	44.1441	131	54.9618	136	65.4412	115	57.3913
T1G;G47C	151	80.1325	138	87.6812	95	66.3158	134	72.3881	86	79.0698	126	66.6667	94	64.8936	123	63.4146	147	76.8707	100	75
T1G;G47T	206	74.2718	173	78.0347	97	55.6701	159	65.4088	147	70.7483	113	64.6018	117	58.9744	130	64.6154	169	79.2899	114	71.9298
T1G;G48A	168	66.6667	169	60.355	71	47.8873	129	54.2636	122	69.6721	98	53.0612	105	49.5238	142	57.0423	145	68.2759	121	58.6777
T1G;G48C	215	89.3023	163	85.8896	86	63.9535	161	85.7143	155	86.4516	113	84.0708	113	75.2212	143	83.2168	180	86.6667	106	83.0189
T1G;G48T	285	85.9649	182	75.2747	96	65.625	203	85.2217	124	80.6452	146	75.3425	140	66.4286	212	74.5283	250	82.4	171	74.269
T1G;G49A	179	48.6034	139	42.446	102	36.2745	168	49.4048	117	52.9915	133	39.8496	110	53.6364	155	40	197	43.6548	120	45.8333
T1G;G49C	186	67.7419	167	70.6587	104	55.7692	164	68.2927	136	61.7647	135	64.4444	132	62.1212	153	66.6667	187	69.5187	121	65.2893
T1G;G49T	177	27.1186	164	25	93	24.7312	147	31.9728	117	30.7692	122	27.0492	115	28.6957	138	21.0145	154	29.8701	137	24.0876
T1G;A50C	91	43.956	90	44.4444	74	37.8378	99	54.5455	76	47.3684	84	38.0952	82	39.0244	79	30.3797	118	38.1356	80	31.25
T1G;A50G	88	29.5455	125	40	90	28.8889	90	35.5556	83	38.5542	79	31.6456	105	48.5714	91	30.7692	110	37.2727	100	37
T1G;A50T	94	8.51064	97	18.5567	82	7.31707	112	10.7143	73	8.21918	83	14.4578	64	17.1875	95	14.7368	129	11.6279	100	15
T1G;C51A	149	53.0201	155	61.2903	99	44.4444	138	55.7971	114	59.6491	88	51.1364	105	54.2857	124	61.2903	152	56.5789	114	58.7719
T1G;C51G	134	65.6716	138	65.942	82	43.9024	141	66.6667	123	68.2927	95	53.6842	105	47.619	152	53.2895	180	57.7778	115	60
T1G;C51T	139	55.3957	148	59.4595	72	38.8889	124	66.9355	108	57.4074	99	34.3434	109	53.211	136	40.4412	162	53.0864	115	52.1739
T1G;G52A	114	50.8772	136	56.6176	82	45.122	120	64.1667	105	60.9524	94	63.8298	98	50	132	48.4848	129	54.2636	93	66.6667
T1G;G52C	81	24.6914	89	19.1011	67	28.3582	87	17.2414	75	34.6667	52	19.2308	91	32.967	73	20.5479	101	23.7624	97	23.7113
T1G;G52T	90	36.6667	113	43.3628	84	29.7619	86	44.186	94	42.5532	104	31.7308	76	48.6842	101	25.7426	134	36.5672	105	40.9524
T1G;A53C	115	10.4348	97	11.3402	70	18.5714	82	6.09756	69	7.24638	72	12.5	71	19.7183	100	7	119	15.9664	101	14.8515
T1G;A53G	92	22.8261	80	6.25	85	44.7059	82	20.7317	78	11.5385	76	10.5263	63	47.619	107	11.215	113	20.354	89	22.4719
T1G;A53T	112	8.03571	83	13.253	70	15.7143	91	9.89011	75	12	89	11.236	89	6.74157	103	8.73786	113	7.07965	92	9.78261
T1G;C54A	109	11.9266	79	16.4557	91	9.89011	106	23.5849	97	15.4639	84	17.8571	102	22.549	113	8.84956	125	15.2	96	19.7917
T1G;C54G	82	9.7561	97	6.18557	72	5.55556	87	2.29885	64	6.25	77	5.19481	77	6.49351	87	3.44828	117	5.98291	107	7.47664
T1G;C54T	129	7.75194	116	4.31034	92	9.78261	118	9.32203	95	8.42105	84	10.7143	101	6.93069	100	6	126	8.73016	94	15.9574
T1G;C55A	71	7.04225	79	5.06329	58	17.2414	68	7.35294	65	3.07692	59	11.8644	64	14.0625	54	7.40741	87	11.4943	61	8.19672
T1G;C55G	47	23.4043	64	21.875	49	34.6939	57	24.5614	59	27.1186	45	24.4444	58	31.0345	48	10.4167	48	27.0833	47	29.7872
T1G;C55T	100	30	111	28.8288	94	54.2553	108	29.6296	79	36.7089	96	37.5	104	50	108	25.9259	99	24.2424	105	43.8095
T1G;C56A	88	12.5	103	13.5922	77	19.4805	106	10.3774	81	7.40741	72	19.4444	89	30.3371	108	8.33333	104	14.4231	75	28
T1G;C56G	87	8.04598	72	6.94444	51	9.80392	92	9.78261	74	8.10811	56	5.35714	68	26.4706	66	4.54545	97	2.06186	68	4.41176
T1G;C56T	99	17.1717	124	13.7097	97	37.1134	117	16.2393	92	19.5652	106	21.6981	105	50.4762	109	10.0917	112	12.5	123	22.7642
T1G;T57A	98	3.06122	76	3.94737	91	24.1758	80	11.25	81	2.46914	83	12.0482	86	31.3953	96	4.16667	98	8.16327	97	20.6186
T1G;T57C	99	9.09091	111	6.30631	70	70	102	40.1961	96	12.5	97	47.4227	89	67.4157	92	10.8696	104	8.65385	102	75.4902
T1G;T57G	83	7.22892	92	3.26087	66	24.2424	93	6.45161	72	5.55556	58	8.62069	89	32.5843	84	9.52381	105	8.57143	76	7.89474
T1G;G58A	90	11.1111	76	15.7895	93	60.2151	106	25.4717	69	10.1449	69	30.4348	92	63.0435	79	20.2532	90	17.7778	88	42.0455
T1G;G58C	96	44.7917	109	36.6972	89	65.1685	99	42.4242	92	42.3913	78	46.1538	95	68.4211	90	46.6667	88	34.0909	115	52.1739
T1G;G58T	105	11.4286	120	21.6667	107	63.5514	127	33.8583	88	14.7727	98	36.7347	172	75	102	20.5882	124	21.7742	129	57.3643
T1G;C59A	162	68.5185	163	68.0982	145	82.069	151	74.8344	148	68.2432	146	65.0685	164	76.8293	140	55.7143	167	67.6647	168	73.2143
T1G;C59G	80	46.25	93	38.7097	68	58.8235	121	60.3306	69	42.029	77	46.7532	115	76.5217	73	34.2466	98	27.551	88	71.5909
T1G;C59T	164	57.9268	164	50	123	77.2358	161	59.0062	140	62.8571	125	61.6	137	74.4526	118	55.0847	160	50.625	127	74.8031
T1G;A60C	184	71.1957	160	66.875	97	50.5155	166	67.4699	112	58.0357	140	57.1429	109	66.9725	149	65.7718	167	62.2754	132	59.8485
T1G;A60G	71	18.3099	110	20	98	63.2653	94	36.1702	60	15	77	35.0649	91	64.8352	86	24.4186	116	17.2414	94	59.5745
T1G;A60T	112	20.5357	128	16.4062	96	23.9583	116	20.6897	87	22.9885	87	19.5402	95	33.6842	112	16.9643	147	11.5646	107	23.3645
T1G;G61A	111	18.018	132	27.2727	92	70.6522	105	40	106	34.9057	89	48.3146	108	75	108	33.3333	139	28.777	115	66.087
T1G;G61C	104	22.1154	116	23.2759	114	70.1754	139	41.0072	108	28.7037	116	40.5172	143	74.1259	115	28.6957	128	22.6562	124	57.2581
T1G;G61T	130	25.3846	136	28.6765	116	75.8621	104	47.1154	105	23.8095	125	40.8	138	81.1594	107	31.7757	159	30.1887	150	62.6667
T1G;A62C	100	39	89	34.8315	118	88.1356	123	67.4797	75	46.6667	85	77.6471	102	87.2549	112	42.8571	99	41.4141	151	85.4305
T1G;A62G	97	58.7629	106	52.8302	84	65.4762	66	62.1212	86	54.6512	75	61.3333	87	74.7126	94	45.7447	105	61.9048	120	68.3333
T1G;A62T	100	18	97	23.7113	124	53.2258	96	26.0417	90	27.7778	96	31.25	129	67.4419	112	26.7857	107	21.4953	109	50.4587
T1G;G63A	142	11.9718	151	8.60927	123	56.0976	136	13.2353	135	7.40741	140	17.8571	142	65.493	142	5.6338	151	11.9205	143	34.2657
T1G;G63C	89	4.49438	124	11.2903	118	62.7119	113	10.6195	125	10.4	97	22.6804	164	67.0732	97	6.18557	138	10.1449	145	44.1379
T1G;G63T	149	9.39597	164	6.09756	183	71.0383	115	21.7391	109	3.66972	140	35	180	76.1111	125	6.4	161	5.59006	175	47.4286
T1G;A64C	81	6.17284	97	8.24742	88	63.6364	87	13.7931	73	13.6986	85	22.3529	121	66.9421	82	7.31707	103	4.85437	82	46.3415
T1G;A64G	118	31.3559	107	39.2523	105	85.7143	109	51.3761	98	58.1633	107	59.8131	108	87.963	97	41.2371	120	42.5	132	81.8182
T1G;A64T	122	13.9344	92	14.1304	106	67.9245	94	26.5957	72	16.6667	87	36.7816	137	77.3723	93	15.0538	86	16.2791	118	50
T1G;G65A	139	10.7914	129	11.6279	174	85.6322	150	46.6667	97	15.4639	155	72.9032	190	91.5789	96	23.9583	154	14.9351	203	80.7882
T1G;G65C	112	8.03571	99	15.1515	127	81.8898	99	34.3434	92	16.3043	99	49.4949	153	84.3137	86	15.1163	97	6.18557	151	66.8874
T1G;G65T	135	14.8148	125	12.8	188	84.0426	138	44.2029	112	11.6071	135	62.2222	182	89.011	110	20	154	17.5325	224	75.4464
T1G;G66A	121	27.2727	144	20.1389	203	86.2069	197	63.9594	147	27.8912	148	75	195	92.3077	148	28.3784	152	17.7632	193	84.456
T1G;G66C	103	33.0097	130	36.1538	138	89.8551	154	81.8182	97	48.4536	122	86.0656	156	95.5128	132	64.3939	131	32.0611	185	92.973
T1G;G66T	145	43.4483	200	59.5	141	93.617	166	80.1205	160	65.625	138	86.2319	182	92.3077	154	69.4805	170	61.7647	177	88.7006
T1G;C67A	134	53.7313	118	60.1695	78	74.359	132	71.9697	81	66.6667	72	59.7222	78	80.7692	123	52.8455	143	64.3357	80	77.5
T1G;C67G	64	31.25	67	46.2687	42	73.8095	79	58.2278	65	53.8462	46	47.8261	58	70.6897	66	45.4545	97	39.1753	67	74.6269
T1G;C67T	101	59.4059	98	73.4694	55	81.8182	93	68.8172	58	70.6897	71	66.1972	70	81.4286	82	57.3171	99	69.697	65	80
T1G;T68A	138	57.971	132	71.2121	96	85.4167	122	77.0492	91	64.8352	81	75.3086	86	80.2326	116	50.8621	124	52.4194	104	85.5769
T1G;T68C	93	45.1613	92	57.6087	82	73.1707	97	68.0412	86	58.1395	86	67.4419	86	87.2093	87	55.1724	116	51.7241	80	83.75
T1G;T68G	73	9.58904	69	24.6377	31	38.7097	76	31.5789	38	18.4211	54	37.037	43	67.4419	68	11.7647	81	17.284	58	62.069
T1G;G69A	250	86.4	257	85.6031	188	90.9574	219	84.4749	187	90.3743	180	81.6667	191	89.0052	215	85.1163	290	82.4138	203	92.6108
T1G;G69C	192	76.5625	185	81.6216	125	94.4	161	86.9565	137	81.0219	136	86.0294	156	94.8718	160	72.5	197	80.7107	176	91.4773
T1G;G69T	221	82.8054	273	90.1099	172	94.7674	199	87.9397	171	92.3977	191	89.0052	189	93.6508	208	90.8654	247	87.0445	196	95.9184
T1G;A70C	77	25.974	63	41.2698	104	85.5769	81	43.2099	58	32.7586	92	68.4783	130	82.3077	75	36	98	29.5918	120	78.3333
T1G;A70G	118	50	129	48.8372	96	79.1667	119	63.8655	82	53.6585	99	68.6869	134	86.5672	91	53.8462	119	46.2185	127	85.8268
T1G;A70T	157	59.8726	140	74.2857	115	89.5652	152	73.6842	122	77.8689	124	83.0645	162	92.5926	104	64.4231	141	73.7589	162	88.2716
T1G;A71C	109	28.4404	96	41.6667	128	89.8438	107	52.3364	92	32.6087	118	61.0169	160	82.5	98	30.6122	129	31.7829	120	79.1667
T1G;A71G	125	19.2	99	32.3232	117	89.7436	124	51.6129	80	40	123	73.9837	154	93.5065	107	26.1682	121	28.0992	163	80.9816
T1G;A71T	126	7.93651	93	7.52688	103	70.8738	115	20	75	4	107	24.2991	115	61.7391	87	8.04598	121	7.43802	131	38.9313
T1G;A72C	107	14.9533	97	15.4639	88	34.0909	83	13.253	84	13.0952	82	20.7317	109	55.0459	92	11.9565	118	16.1017	105	23.8095
T1G;A72G	121	30.5785	92	29.3478	160	88.125	150	53.3333	89	35.9551	145	64.8276	160	89.375	119	28.5714	117	18.8034	179	77.095
T1G;A72T	114	21.9298	93	43.0108	112	65.1786	112	29.4643	92	27.1739	94	38.2979	126	67.4603	83	22.8916	129	25.5814	145	55.1724
T2A;T3A	30	46.6667	37	40.5405	49	73.4694	61	78.6885	30	56.6667	52	75	38	86.8421	50	68	60	60	52	82.6923
T2A;T3C	49	4.08163	67	10.4478	26	61.5385	48	41.6667	47	19.1489	38	63.1579	33	66.6667	40	45	73	15.0685	39	66.6667
T2A;T3G	28	3.57143	58	13.7931	45	82.2222	61	73.7705	47	25.5319	47	72.3404	48	77.0833	50	48	67	22.3881	73	84.9315
T2A;C4A	53	11.3208	59	23.7288	22	50	43	51.1628	41	34.1463	18	38.8889	25	56	44	29.5455	66	27.2727	32	53.125
T2A;C4G	101	7.92079	74	16.2162	43	65.1163	69	52.1739	50	40	52	53.8462	44	52.2727	69	40.5797	76	17.1053	52	61.5385
T2A;C4T	59	11.8644	63	23.8095	26	53.8462	46	47.8261	35	37.1429	28	46.4286	28	67.8571	33	42.4242	56	32.1429	37	56.7568
T2A;A5C	49	24.4898	43	23.2558	22	63.6364	34	58.8235	33	45.4545	34	55.8824	24	62.5	36	38.8889	58	32.7586	31	64.5161
T2A;A5G	39	15.3846	48	18.75	31	90.3226	64	65.625	41	39.0244	37	62.1622	50	86	59	57.6271	61	29.5082	48	87.5
T2A;A5T	29	0	31	0	11	45.4545	10	30	17	29.4118	13	15.3846	9	11.1111	18	16.6667	37	5.40541	11	9.09091
T2A;G6A	115	68.6957	165	83.6364	124	79.8387	135	82.2222	119	87.395	135	80.7407	144	89.5833	110	82.7273	180	82.2222	152	89.4737
T2A;G6C	115	64.3478	160	76.25	125	88.8	174	77.5862	118	79.661	116	84.4828	127	94.4882	159	79.2453	184	75	158	86.7089
T2A;G6T	139	66.1871	198	76.2626	135	88.8889	170	86.4706	136	83.8235	145	89.6552	127	88.9764	143	79.021	181	73.4807	154	88.3117
T2A;C7A	102	74.5098	166	82.5301	96	90.625	139	87.0504	115	83.4783	107	83.1776	127	91.3386	161	81.9876	178	78.0899	124	83.0645
T2A;C7G	105	77.1429	138	86.9565	100	92	159	89.9371	92	80.4348	102	88.2353	107	86.9159	117	83.7607	141	84.3972	112	81.25
T2A;C7T	93	41.9355	138	49.2754	106	87.7358	158	79.7468	117	67.5214	125	80.8	130	96.1538	125	77.6	146	63.0137	127	91.3386
T2A;C8A	96	58.3333	128	78.125	174	92.5287	183	88.5246	177	92.6554	168	88.0952	206	96.1165	189	87.8307	173	82.0809	190	92.6316
T2A;C8G	92	89.1304	92	92.3913	85	94.1176	98	93.8776	93	91.3978	82	92.6829	102	95.098	107	90.6542	122	84.4262	96	90.625
T2A;C8T	79	40.5063	114	57.8947	133	92.4812	180	92.2222	103	67.9612	144	83.3333	136	98.5294	176	77.2727	119	58.8235	163	90.184
T2A;G9A	96	12.5	126	6.34921	90	66.6667	108	9.25926	95	6.31579	99	11.1111	87	74.7126	126	4.7619	147	6.80272	121	34.7107
T2A;G9C	79	5.06329	98	10.2041	74	10.8108	99	5.05051	79	5.06329	79	5.06329	68	30.8824	91	9.89011	125	10.4	110	12.7273
T2A;G9T	100	1	94	3.19149	44	13.6364	87	2.29885	75	1.33333	75	5.33333	53	22.6415	108	4.62963	105	3.80952	79	10.1266
T2A;G10A	97	17.5258	138	11.5942	127	82.6772	137	40.146	88	14.7727	104	45.1923	128	86.7188	99	14.1414	110	14.5455	134	75.3731
T2A;G10C	67	10.4478	62	12.9032	46	58.6957	59	25.4237	47	12.766	57	21.0526	54	57.4074	69	11.5942	75	12	57	42.1053
T2A;G10T	49	10.2041	73	8.21918	47	31.9149	64	18.75	59	3.38983	56	17.8571	43	62.7907	58	10.3448	76	5.26316	40	35
T2A;A11C	34	23.5294	39	5.12821	17	52.9412	43	25.5814	32	12.5	29	24.1379	32	34.375	35	14.2857	42	16.6667	24	25
T2A;A11G	39	30.7692	44	40.9091	79	88.6076	92	91.3043	46	71.7391	97	84.5361	99	87.8788	66	74.2424	64	53.125	98	90.8163
T2A;A11T	74	5.40541	42	4.7619	23	34.7826	52	7.69231	36	8.33333	45	8.88889	34	41.1765	59	5.08475	65	4.61538	39	25.641
T2A;A12C	53	11.3208	61	3.27869	40	15	72	18.0556	55	5.45455	58	13.7931	40	32.5	65	12.3077	65	9.23077	51	19.6078
T2A;A12G	66	4.54545	70	5.71429	50	70	48	52.0833	55	21.8182	52	51.9231	39	89.7436	53	15.0943	76	5.26316	70	80
T2A;A12T	98	2.04082	107	6.54206	55	12.7273	95	9.47368	65	1.53846	77	7.79221	69	5.7971	98	7.14286	112	4.46429	71	12.6761
T2A;G13A	50	16	72	59.7222	52	78.8462	80	67.5	66	75.7576	57	63.1579	50	78	66	59.0909	80	67.5	58	75.8621
T2A;G13C	71	7.04225	83	15.6627	39	58.9744	58	50	45	33.3333	37	54.0541	35	65.7143	65	43.0769	81	11.1111	60	63.3333
T2A;G13T	53	11.3208	78	19.2308	39	53.8462	66	69.697	59	37.2881	48	60.4167	57	73.6842	66	62.1212	64	31.25	78	67.9487
T2A;C14A	45	22.2222	52	21.1538	30	10	41	19.5122	32	21.875	30	23.3333	46	19.5652	47	27.6596	48	25	40	22.5
T2A;C14G	33	12.1212	24	20.8333	21	19.0476	38	13.1579	22	18.1818	28	14.2857	42	2.38095	42	23.8095	40	25	34	8.82353
T2A;C14T	43	9.30233	51	9.80392	31	32.2581	47	10.6383	55	10.9091	45	13.3333	42	14.2857	51	13.7255	55	1.81818	50	28
T2A;G15A	51	7.84314	69	5.7971	47	14.8936	92	6.52174	77	12.987	57	8.77193	70	8.57143	63	12.6984	90	13.3333	80	6.25
T2A;G15C	63	12.6984	76	15.7895	51	35.2941	75	17.3333	59	8.47458	53	16.9811	59	52.5424	74	8.10811	88	6.81818	51	21.5686
T2A;G15T	79	5.06329	101	10.8911	53	16.9811	60	8.33333	54	7.40741	50	14	60	25	92	2.17391	108	8.33333	75	10.6667
T2A;G16A	25	0	23	4.34783	23	8.69565	34	14.7059	29	6.89655	30	16.6667	25	0	22	9.09091	44	4.54545	38	13.1579
T2A;G16C	63	4.7619	50	12	48	18.75	67	16.4179	52	1.92308	57	26.3158	73	24.6575	72	9.72222	59	18.6441	60	26.6667
T2A;G16T	39	2.5641	28	7.14286	26	11.5385	26	0	34	20.5882	34	17.6471	40	22.5	29	3.44828	42	19.0476	37	21.6216
T2A;G17A	41	4.87805	49	20.4082	41	34.1463	49	20.4082	35	11.4286	45	15.5556	50	46	40	17.5	56	17.8571	50	24
T2A;G17C	68	26.4706	98	22.449	70	54.2857	75	26.6667	69	37.6812	70	25.7143	88	69.3182	101	30.6931	96	33.3333	81	46.9136
T2A;G17T	16	0	25	24	21	19.0476	16	31.25	27	18.5185	23	13.0435	23	65.2174	24	25	31	16.129	30	33.3333
T2A;A18C	88	4.54545	87	20.6897	68	11.7647	94	11.7021	79	10.1266	94	10.6383	76	25	96	11.4583	140	12.1429	79	12.6582
T2A;A18G	119	12.605	121	15.7025	81	24.6914	151	9.27152	91	15.3846	113	14.1593	116	16.3793	113	8.84956	122	11.4754	110	21.8182
T2A;A18T	86	12.7907	71	4.22535	66	9.09091	74	10.8108	62	8.06452	58	5.17241	57	8.77193	67	5.97015	83	3.61446	60	8.33333
T2A;C19A	42	23.8095	66	30.303	58	41.3793	52	48.0769	53	41.5094	57	45.614	61	54.0984	60	20	88	42.0455	61	47.541
T2A;C19G	46	10.8696	46	6.52174	24	12.5	41	24.3902	39	10.2564	30	13.3333	26	15.3846	44	11.3636	41	17.0732	41	14.6341
T2A;C19T	33	6.06061	36	11.1111	32	12.5	37	10.8108	19	10.5263	26	7.69231	33	18.1818	34	5.88235	38	15.7895	32	6.25
T2A;G20A	85	31.7647	94	51.0638	75	66.6667	121	68.595	71	40.8451	92	43.4783	81	60.4938	76	27.6316	138	44.9275	109	47.7064
T2A;G20C	37	35.1351	45	22.2222	48	33.3333	32	25	38	36.8421	23	21.7391	41	26.8293	44	20.4545	48	25	34	32.3529
T2A;G20T	92	43.4783	92	44.5652	74	59.4595	119	52.1008	106	55.6604	88	53.4091	130	60.7692	90	38.8889	141	50.3546	104	45.1923
T2A;A21C	87	8.04598	93	4.30108	77	12.987	93	16.129	74	8.10811	52	5.76923	70	15.7143	67	4.47761	94	11.7021	61	14.7541
T2A;A21G	81	13.5802	81	18.5185	76	90.7895	86	74.4186	62	22.5806	61	75.4098	86	77.907	85	38.8235	74	20.2703	86	84.8837
T2A;A21T	89	16.8539	62	6.45161	57	35.0877	69	20.2899	49	8.16327	61	18.0328	59	38.9831	68	11.7647	94	7.44681	92	19.5652
T2A;C22A	64	10.9375	72	16.6667	62	29.0323	99	15.1515	67	17.9104	70	20	84	50	86	10.4651	102	19.6078	64	26.5625
T2A;C22G	63	6.34921	63	3.1746	51	9.80392	59	5.08475	57	5.26316	60	3.33333	51	1.96078	57	1.75439	85	3.52941	55	3.63636
T2A;C22T	23	13.0435	21	9.52381	24	4.16667	21	9.52381	18	22.2222	23	21.7391	36	22.2222	29	17.2414	34	5.88235	40	15
T2A;C23A	32	0	42	7.14286	34	17.6471	55	12.7273	28	25	34	14.7059	41	7.31707	44	9.09091	64	9.375	37	16.2162
T2A;C23G	35	34.2857	27	40.7407	18	33.3333	37	48.6486	26	38.4615	35	40	45	42.2222	40	42.5	37	51.3514	33	45.4545
T2A;C23T	34	2.94118	68	10.2941	44	45.4545	42	4.7619	47	8.51064	47	10.6383	65	35.3846	49	12.2449	62	4.83871	46	17.3913
T2A;C24A	41	12.1951	39	38.4615	54	18.5185	51	19.6078	40	22.5	41	24.3902	47	29.7872	49	10.2041	57	8.77193	51	19.6078
T2A;C24G	49	20.4082	69	34.7826	48	41.6667	68	39.7059	44	25	71	33.8028	69	47.8261	55	30.9091	86	18.6047	60	40
T2A;C24T	53	26.4151	63	30.1587	64	81.25	71	29.5775	75	30.6667	68	47.0588	92	81.5217	56	26.7857	79	21.519	73	73.9726
T2A;G25A	47	2.12766	58	1.72414	34	17.6471	36	8.33333	38	10.5263	52	11.5385	52	28.8462	65	3.07692	75	6.66667	44	25
T2A;G25C	79	6.32911	105	9.52381	66	12.1212	109	11.0092	76	15.7895	96	28.125	100	34	90	10	111	12.6126	85	15.2941
T2A;G25T	68	7.35294	71	9.85915	75	28	60	10	77	7.79221	71	8.4507	62	54.8387	87	3.44828	125	13.6	83	19.2771
T2A;T26A	134	24.6269	142	29.5775	255	87.451	204	57.3529	126	38.0952	184	68.4783	273	94.5055	131	43.5115	180	28.3333	252	87.6984
T2A;T26C	92	28.2609	82	23.1707	112	92.8571	155	75.4839	93	29.0323	144	78.4722	156	94.8718	100	43	127	27.5591	179	91.0615
T2A;T26G	100	22	113	23.8938	228	90.3509	149	54.3624	100	37	143	66.4336	233	89.2704	138	34.058	129	25.5814	228	80.7018
T2A;T27A	159	20.7547	151	19.8675	230	88.2609	197	46.7005	131	21.374	198	58.5859	243	93.0041	136	31.6176	190	23.1579	248	83.4677
T2A;T27C	124	30.6452	119	43.6975	156	91.6667	185	83.2432	104	46.1538	172	85.4651	213	96.2441	129	61.2403	133	33.0827	233	93.133
T2A;T27G	102	12.7451	94	11.7021	130	63.0769	134	13.4328	92	16.3043	113	28.3186	142	63.3803	102	15.6863	119	12.605	144	41.6667
T2A;T28A	141	18.4397	133	25.5639	242	90.4959	175	37.1429	129	26.3566	198	61.6162	240	93.3333	154	24.6753	161	16.7702	223	83.4081
T2A;T28C	111	11.7117	118	24.5763	157	87.2611	149	43.6242	96	23.9583	127	57.4803	189	90.4762	100	21	136	14.7059	175	76.5714
T2A;T28G	98	24.4898	105	16.1905	107	73.8318	129	29.4574	108	24.0741	111	41.4414	154	70.7792	96	33.3333	150	21.3333	140	57.1429
T2A;T29A	143	14.6853	128	16.4062	217	87.0968	170	41.1765	114	14.9123	154	55.8442	211	91.9431	126	24.6032	155	12.2581	189	71.9577
T2A;T29C	116	47.4138	145	58.6207	163	92.638	150	86.6667	118	69.4915	139	89.2086	153	92.1569	133	78.1955	138	68.1159	185	92.4324
T2A;T29G	129	21.7054	119	13.4454	109	64.2202	95	22.1053	82	9.7561	94	28.7234	126	53.9683	103	3.8835	109	11.9266	118	44.0678
T2A;C30A	110	9.09091	124	8.87097	94	64.8936	123	13.8211	81	8.64198	88	29.5455	93	65.5914	109	10.0917	147	7.48299	122	44.2623
T2A;C30G	59	10.1695	85	9.41176	56	50	87	11.4943	69	5.7971	49	16.3265	81	55.5556	84	11.9048	90	11.1111	76	42.1053
T2A;C30T	158	10.1266	135	17.7778	169	86.3905	157	33.121	129	19.3798	138	55.0725	223	90.583	154	18.1818	184	18.4783	203	73.8916
T2A;C31A	44	2.27273	60	5	32	46.875	71	19.7183	60	8.33333	35	25.7143	53	67.9245	62	4.83871	109	7.33945	48	43.75
T2A;C31G	52	9.61538	83	8.43373	84	71.4286	88	38.6364	61	13.1148	80	53.75	67	82.0896	60	21.6667	85	14.1176	79	74.6835
T2A;C31T	107	7.47664	112	7.14286	84	76.1905	108	25.9259	89	11.236	103	28.1553	89	77.5281	89	17.9775	128	8.59375	91	58.2418
T2A;C32A	125	22.4	147	25.1701	169	91.716	165	60.6061	99	22.2222	167	76.0479	229	90.8297	129	41.8605	154	29.2208	200	87.5
T2A;C32G	31	41.9355	55	45.4545	32	78.125	44	86.3636	40	67.5	38	73.6842	41	82.9268	37	75.6757	61	36.0656	39	82.0513
T2A;C32T	113	11.5044	109	19.2661	131	87.0229	147	65.9864	126	20.6349	122	77.8689	124	89.5161	151	27.1523	141	17.7305	152	82.8947
T2A;T33A	153	24.8366	145	24.1379	244	95.9016	210	73.8095	128	35.1562	224	83.9286	247	95.5466	154	44.1558	166	29.5181	273	91.9414
T2A;T33C	97	20.6186	139	25.8993	185	91.3514	182	67.5824	121	52.0661	186	82.7957	217	94.47	137	59.1241	159	38.9937	184	86.413
T2A;T33G	135	40.7407	125	33.6	147	79.5918	150	54.6667	108	50	113	60.177	172	71.5116	149	42.953	157	38.2166	203	68.9655
T2A;C34A	116	25.8621	161	25.4658	227	94.7137	214	70.5607	109	27.5229	233	85.8369	269	95.9108	178	47.7528	151	23.1788	277	89.1697
T2A;C34G	140	35	160	38.125	236	91.9492	237	83.1224	137	59.854	220	85.9091	266	95.4887	221	67.8733	197	48.731	252	93.254
T2A;C34T	197	22.8426	245	16.7347	309	90.9385	277	63.1769	192	30.2083	272	70.9559	389	92.0308	234	35.8974	212	27.8302	368	85.8696
T2A;T35A	110	20.9091	117	32.4786	165	86.0606	160	66.25	105	35.2381	167	78.4431	179	93.2961	156	45.5128	162	23.4568	237	86.4979
T2A;T35C	121	29.7521	123	34.9593	175	93.1429	183	71.5847	100	42	171	81.2865	188	95.2128	134	55.9701	157	29.9363	240	91.25
T2A;T35G	115	16.5217	122	22.9508	192	91.1458	217	75.576	107	35.514	205	86.3415	230	95.2174	139	45.3237	145	25.5172	205	90.7317
T2A;T36A	84	10.7143	85	10.5882	92	82.6087	115	46.9565	93	26.8817	72	65.2778	112	87.5	90	30	105	13.3333	104	87.5
T2A;T36C	43	2.32558	54	11.1111	44	65.9091	42	21.4286	30	10	41	36.5854	48	47.9167	41	17.0732	59	3.38983	40	57.5
T2A;T36G	95	30.5263	111	34.2342	93	78.4946	131	77.8626	84	42.8571	103	83.4951	106	89.6226	103	62.1359	114	28.0702	118	91.5254
T2A;T37A	74	10.8108	75	8	80	82.5	93	45.1613	65	10.7692	86	62.7907	80	80	63	38.0952	75	13.3333	94	72.3404
T2A;T37C	92	23.913	86	26.7442	115	89.5652	142	68.3099	85	43.5294	129	76.7442	131	92.3664	128	39.0625	118	37.2881	126	84.127
T2A;T37G	73	4.10959	76	17.1053	100	81	117	71.7949	66	33.3333	85	80	94	85.1064	89	65.1685	79	27.8481	83	85.5422
T2A;C38A	80	7.5	72	12.5	60	90	89	44.9438	77	25.974	62	66.129	79	81.0127	92	20.6522	101	17.8218	93	77.4194
T2A;C38G	69	10.1449	88	11.3636	83	77.1084	96	51.0417	84	22.619	80	63.75	90	78.8889	102	31.3725	105	20	90	80
T2A;C38T	70	4.28571	87	4.5977	74	89.1892	83	54.2169	76	18.4211	71	74.6479	73	86.3014	64	15.625	94	19.1489	79	75.9494
T2A;A39C	97	12.3711	101	17.8218	85	83.5294	96	62.5	93	29.0323	84	64.2857	82	82.9268	100	46	115	20.8696	112	87.5
T2A;A39G	133	15.0376	134	16.4179	132	81.8182	133	54.1353	123	27.6423	112	71.4286	124	89.5161	122	31.1475	145	22.069	143	84.6154
T2A;A39T	117	11.9658	111	12.6126	138	84.058	161	59.0062	91	30.7692	156	71.1538	154	90.9091	129	38.7597	131	30.5344	149	85.906
T2A;T40A	91	10.989	76	9.21053	70	75.7143	94	43.617	83	16.8675	82	62.1951	83	75.9036	62	25.8065	97	16.4948	98	78.5714
T2A;T40C	75	9.33333	67	23.8806	72	80.5556	97	56.701	61	22.9508	65	61.5385	84	82.1429	75	38.6667	111	13.5135	101	86.1386
T2A;T40G	69	10.1449	71	11.2676	58	77.5862	91	48.3516	80	15	73	61.6438	75	86.6667	96	8.33333	86	5.81395	86	69.7674
T2A;T41A	95	9.47368	98	17.3469	89	86.5169	94	54.2553	85	31.7647	74	64.8649	91	90.1099	80	41.25	96	22.9167	95	76.8421
T2A;T41C	82	10.9756	77	19.4805	69	89.8551	101	44.5545	83	27.7108	84	69.0476	93	82.7957	81	35.8025	95	12.6316	79	77.2152
T2A;T41G	91	13.1868	102	6.86275	90	66.6667	95	18.9474	79	7.59494	90	33.3333	91	78.022	78	7.69231	102	7.84314	77	58.4416
T2A;G42A	83	8.43373	84	8.33333	82	81.7073	110	40.9091	90	22.2222	83	55.4217	80	82.5	93	11.828	114	14.0351	113	83.1858
T2A;G42C	105	17.1429	113	11.5044	97	87.6289	119	62.1849	91	25.2747	97	76.2887	102	95.098	128	23.4375	117	27.3504	138	80.4348
T2A;G42T	98	14.2857	103	15.534	85	81.1765	140	60.7143	91	19.7802	127	66.9291	93	92.4731	106	25.4717	166	18.6747	120	85.8333
T2A;C43A	115	6.95652	137	8.75912	150	76.6667	183	31.694	116	15.5172	139	42.446	148	80.4054	132	15.1515	184	4.34783	191	66.4921
T2A;C43G	99	8.08081	85	7.05882	86	54.6512	123	4.87805	90	7.77778	90	12.2222	90	56.6667	112	9.82143	127	6.29921	101	30.6931
T2A;C43T	88	14.7727	117	11.1111	66	84.8485	101	54.4554	78	23.0769	95	66.3158	87	86.2069	79	21.519	133	15.0376	122	79.5082
T2A;G44A	88	5.68182	121	7.43802	44	36.3636	81	23.4568	70	8.57143	71	1.40845	68	44.1176	79	5.06329	95	9.47368	66	15.1515
T2A;G44C	87	11.4943	101	22.7723	87	78.1609	113	46.9027	70	22.8571	113	61.0619	99	86.8687	100	29	103	18.4466	132	84.0909
T2A;G44T	76	6.57895	75	10.6667	67	79.1045	99	39.3939	75	8	80	48.75	85	80	77	18.1818	96	6.25	94	56.383
T2A;C45A	102	1.96078	122	9.01639	77	22.0779	102	6.86275	100	7	92	9.78261	98	28.5714	107	10.2804	126	4.7619	94	26.5957
T2A;C45G	50	4	59	6.77966	31	38.7097	59	10.1695	45	13.3333	39	23.0769	55	50.9091	54	5.55556	70	2.85714	49	22.449
T2A;C45T	30	6.66667	56	17.8571	45	75.5556	37	48.6486	50	30	52	53.8462	60	76.6667	50	32	51	25.4902	54	70.3704
T2A;G46A	42	30.9524	53	64.1509	67	86.5672	73	87.6712	84	79.7619	80	72.5	75	85.3333	84	78.5714	88	62.5	91	76.9231
T2A;G46C	122	19.6721	125	12	141	73.0496	164	33.5366	155	20	133	43.609	153	85.6209	137	18.9781	184	19.5652	172	72.6744
T2A;G46T	138	47.1014	128	60.9375	109	88.9908	117	86.3248	108	62.963	123	73.9837	126	79.3651	125	56.8	163	54.6012	131	81.6794
T2A;G47A	158	46.8354	136	45.5882	153	82.3529	175	73.1429	126	49.2063	173	76.3006	178	89.3258	155	58.7097	163	47.8528	197	80.7107
T2A;G47C	134	29.1045	116	34.4828	116	81.0345	100	43	86	32.5581	131	55.7252	127	75.5906	114	28.0702	148	36.4865	119	57.9832
T2A;G47T	153	36.6013	150	38.6667	139	69.7842	168	47.0238	118	42.3729	123	52.8455	175	80	138	35.5072	189	31.746	158	61.3924
T2A;G48A	127	5.51181	114	13.1579	120	39.1667	130	19.2308	108	14.8148	121	26.4463	114	52.6316	127	15.748	137	13.8686	129	26.3566
T2A;G48C	67	23.8806	74	40.5405	53	64.1509	90	47.7778	68	39.7059	59	40.678	69	62.3188	74	28.3784	102	41.1765	73	47.9452
T2A;G48T	155	16.7742	134	20.1493	146	56.1644	167	40.1198	109	19.2661	130	36.9231	159	72.327	134	17.1642	166	19.2771	147	50.3401
T2A;G49A	131	7.63359	115	10.4348	96	32.2917	116	11.2069	100	12	110	20	127	51.1811	111	8.10811	140	11.4286	118	18.6441
T2A;G49C	86	3.48837	90	6.66667	62	11.2903	93	6.45161	73	10.9589	89	7.86517	61	27.8689	100	2	104	6.73077	59	10.1695
T2A;G49T	140	7.14286	149	3.3557	111	7.20721	155	1.93548	105	8.57143	110	4.54545	92	11.9565	123	7.31707	160	5	114	6.14035
T2A;A50C	63	11.1111	80	15	56	21.4286	72	16.6667	57	3.50877	71	8.4507	60	30	71	2.8169	93	6.45161	72	16.6667
T2A;A50G	61	18.0328	58	10.3448	52	38.4615	46	15.2174	31	12.9032	43	16.2791	51	80.3922	57	19.2982	64	21.875	48	50
T2A;A50T	75	14.6667	87	16.092	53	16.9811	98	9.18367	79	15.1899	72	12.5	67	13.4328	87	13.7931	125	11.2	73	21.9178
T2A;C51A	67	25.3731	81	17.284	58	34.4828	66	19.697	65	15.3846	61	29.5082	77	51.9481	62	20.9677	82	28.0488	73	31.5068
T2A;C51G	63	23.8095	67	22.3881	51	35.2941	61	19.6721	67	19.403	64	23.4375	52	34.6154	65	20	72	22.2222	68	25
T2A;C51T	50	18	62	24.1935	48	43.75	47	34.0426	42	26.1905	34	14.7059	52	51.9231	39	15.3846	51	23.5294	50	44
T2A;G52A	42	30.9524	47	31.9149	43	44.186	31	25.8065	35	25.7143	30	56.6667	52	53.8462	47	44.6809	37	40.5405	41	53.6585
T2A;G52C	75	20	82	23.1707	41	43.9024	77	38.961	48	20.8333	46	30.4348	68	60.2941	74	13.5135	77	24.6753	62	37.0968
T2A;G52T	27	14.8148	39	33.3333	36	36.1111	43	48.8372	33	24.2424	39	46.1538	44	36.3636	39	23.0769	55	30.9091	36	30.5556
T2A;A53C	120	2.5	110	14.5455	98	33.6735	112	9.82143	106	9.43396	88	17.0455	86	43.0233	97	11.3402	113	10.6195	108	23.1481
T2A;A53G	98	11.2245	84	17.8571	84	77.381	116	17.2414	78	12.8205	72	23.6111	96	73.9583	75	13.3333	120	11.6667	99	55.5556
T2A;A53T	126	15.0794	117	5.98291	95	11.5789	105	11.4286	116	12.069	116	12.069	108	5.55556	107	8.41121	133	9.77444	109	8.25688
T2A;C54A	130	17.6923	142	24.6479	85	31.7647	131	22.1374	92	21.7391	104	25	128	53.9062	121	19.8347	131	16.7939	117	31.6239
T2A;C54G	126	15.0794	124	16.129	77	10.3896	99	4.0404	104	8.65385	101	11.8812	87	27.5862	95	15.7895	139	10.7914	120	14.1667
T2A;C54T	134	5.97015	130	13.0769	111	13.5135	149	8.05369	108	8.33333	117	5.98291	85	10.5882	116	4.31034	140	13.5714	131	12.9771
T2A;C55A	67	14.9254	59	5.08475	57	38.5965	62	20.9677	51	7.84314	63	19.0476	66	51.5152	53	7.54717	70	10	61	22.9508
T2A;C55G	25	32	32	28.125	39	25.641	37	29.7297	27	40.7407	28	21.4286	60	46.6667	43	23.2558	52	25	58	29.3103
T2A;C55T	80	21.25	68	20.5882	94	80.8511	108	62.037	60	36.6667	100	63	112	82.1429	84	46.4286	91	29.6703	106	86.7925
T2A;C56A	49	14.2857	95	9.47368	58	62.069	57	21.0526	66	10.6061	42	35.7143	84	75	82	6.09756	73	6.84932	78	51.2821
T2A;C56G	30	6.66667	30	0	22	18.1818	45	6.66667	25	8	34	17.6471	34	52.9412	31	6.45161	48	12.5	23	8.69565
T2A;C56T	89	5.61798	103	6.79612	99	75.7576	117	35.8974	65	23.0769	111	36.9369	165	83.6364	103	24.2718	130	10.7692	156	60.8974
T2A;T57A	60	3.33333	70	1.42857	39	61.5385	65	27.6923	55	3.63636	65	29.2308	47	76.5957	63	14.2857	78	7.69231	73	49.3151
T2A;T57C	104	13.4615	114	18.4211	60	80	66	46.9697	103	16.5049	63	60.3175	58	77.5862	81	27.1605	113	10.6195	101	75.2475
T2A;T57G	45	6.66667	61	18.0328	34	55.8824	49	24.4898	46	4.34783	38	26.3158	48	50	57	7.01754	74	13.5135	36	36.1111
T2A;G58A	95	12.6316	99	21.2121	96	77.0833	84	47.619	76	22.3684	98	72.449	101	91.0891	91	40.6593	98	17.3469	100	78
T2A;G58C	50	26	62	29.0323	70	88.5714	64	75	48	45.8333	62	82.2581	89	83.1461	60	63.3333	57	33.3333	67	83.5821
T2A;G58T	134	29.1045	177	27.1186	172	86.6279	190	72.1053	124	45.1613	171	84.2105	199	93.9698	166	51.8072	186	26.8817	228	89.9123
T2A;C59A	94	35.1064	111	38.7387	124	92.7419	179	89.9441	104	61.5385	129	82.9457	132	91.6667	114	75.4386	125	52.8	151	87.4172
T2A;C59G	31	12.9032	39	25.641	47	76.5957	52	75	27	29.6296	27	70.3704	55	74.5455	42	40.4762	33	12.1212	51	70.5882
T2A;C59T	105	24.7619	103	51.4563	100	84	130	76.9231	87	65.5172	124	84.6774	106	91.5094	132	70.4545	126	35.7143	151	88.0795
T2A;A60C	86	8.13953	74	18.9189	81	91.358	88	39.7727	68	19.1176	87	49.4253	92	86.9565	93	23.6559	103	11.6505	123	74.7967
T2A;A60G	88	10.2273	76	7.89474	64	79.6875	82	58.5366	60	16.6667	56	76.7857	60	66.6667	68	26.4706	85	17.6471	90	76.6667
T2A;A60T	118	8.47458	95	6.31579	123	72.3577	119	22.6891	80	22.5	88	26.1364	107	67.2897	107	13.0841	118	7.62712	120	41.6667
T2A;G61A	77	7.79221	81	12.3457	82	79.2683	67	65.6716	60	30	61	65.5738	79	82.2785	84	41.6667	90	28.8889	86	81.3953
T2A;G61C	105	11.4286	124	17.7419	145	92.4138	165	81.2121	98	48.9796	158	84.1772	160	90.625	133	58.6466	165	21.8182	170	83.5294
T2A;G61T	95	9.47368	100	12	104	87.5	140	72.8571	82	43.9024	125	75.2	125	86.4	107	37.3832	142	23.2394	149	83.2215
T2A;A62C	133	36.0902	112	40.1786	181	92.8177	217	87.5576	136	62.5	162	92.5926	179	95.5307	164	81.7073	170	54.1176	223	93.722
T2A;A62G	63	31.746	85	34.1176	57	80.7018	76	68.4211	74	48.6486	84	79.7619	81	76.5432	67	38.806	76	52.6316	85	84.7059
T2A;A62T	149	23.4899	133	30.8271	203	89.1626	207	72.4638	135	50.3704	213	83.0986	212	89.6226	136	50	166	30.1205	258	88.3721
T2A;G63A	157	10.828	170	10.5882	219	89.4977	189	38.0952	132	18.1818	213	61.0329	294	91.8367	176	18.75	199	8.0402	234	80.7692
T2A;G63C	148	13.5135	146	14.3836	254	92.126	184	47.2826	117	19.6581	175	58.8571	265	89.0566	170	33.5294	185	12.4324	257	78.9883
T2A;G63T	152	11.8421	180	12.7778	401	95.5112	320	79.6875	130	31.5385	338	86.0947	379	97.6253	187	41.7112	191	14.6597	349	93.1232
T2A;A64C	123	8.94309	91	18.6813	192	79.1667	122	43.4426	82	10.9756	152	59.8684	212	86.7925	98	14.2857	132	11.3636	188	72.8723
T2A;A64G	84	33.3333	121	37.1901	108	90.7407	125	72	83	32.5301	112	87.5	105	97.1429	117	60.6838	136	39.7059	135	91.8519
T2A;A64T	130	18.4615	120	10	177	90.9605	191	66.4921	112	24.1071	181	75.6906	218	92.6606	127	30.7087	129	17.0543	243	92.1811
T2A;G65A	184	32.0652	216	46.2963	311	95.4984	323	94.4272	279	86.3799	319	92.79	312	96.1538	315	90.7937	244	66.3934	350	95.7143
T2A;G65C	110	18.1818	106	25.4717	142	86.6197	225	90.6667	152	84.8684	198	86.8687	166	94.5783	181	85.0829	127	42.5197	188	93.0851
T2A;G65T	159	40.2516	219	59.3607	278	93.5252	369	92.4119	280	90.7143	263	93.9163	296	94.5946	338	89.9408	268	68.2836	342	95.3216
T2A;G66A	55	40	94	64.8936	90	95.5556	129	85.2713	98	80.6122	95	89.4737	115	90.4348	109	83.4862	115	71.3043	125	88.8
T2A;G66C	100	22	109	33.945	173	91.9075	255	92.9412	145	86.8966	182	91.7582	205	95.122	216	88.8889	127	44.0945	205	91.7073
T2A;G66T	73	57.5342	148	73.6486	118	91.5254	142	93.662	126	92.8571	155	91.6129	134	89.5522	168	80.9524	156	84.6154	157	94.2675
T2A;C67A	21	28.5714	41	36.5854	43	93.0233	66	87.8788	40	72.5	41	85.3659	58	87.931	55	74.5455	57	66.6667	50	86
T2A;C67G	11	18.1818	34	20.5882	37	59.4595	28	64.2857	32	34.375	25	80	28	78.5714	32	56.25	27	37.037	50	78
T2A;C67T	27	25.9259	46	43.4783	40	85	53	71.6981	35	62.8571	46	80.4348	30	93.3333	51	62.7451	35	60	45	82.2222
T2A;T68A	29	48.2759	42	64.2857	40	82.5	60	80	60	88.3333	54	79.6296	50	86	60	70	65	84.6154	58	96.5517
T2A;T68C	34	52.9412	40	62.5	37	91.8919	38	84.2105	40	85	51	86.2745	48	87.5	53	75.4717	54	61.1111	45	95.5556
T2A;T68G	15	13.3333	20	5	25	80	35	71.4286	16	31.25	23	73.913	24	83.3333	19	47.3684	25	28	36	86.1111
T2A;G69A	118	71.1864	173	86.1272	122	95.9016	199	91.4573	133	90.2256	141	90.7801	180	92.2222	172	88.9535	184	94.5652	174	91.954
T2A;G69C	102	73.5294	123	91.0569	103	97.0874	156	91.6667	121	95.0413	125	91.2	107	91.5888	121	88.4298	157	91.0828	110	95.4545
T2A;G69T	130	80.7692	202	92.5743	157	95.5414	160	95.625	158	94.9367	163	93.2515	185	95.1351	184	89.6739	216	87.037	188	95.2128
T2A;A70C	114	77.193	148	87.8378	154	97.4026	190	88.9474	146	93.1507	175	92.5714	179	96.648	193	94.3005	168	86.9048	206	97.5728
T2A;A70G	62	20.9677	80	28.75	70	91.4286	103	82.5243	79	37.9747	78	92.3077	86	95.3488	86	68.6047	104	33.6538	93	87.0968
T2A;A70T	131	37.4046	128	35.9375	202	95.5446	198	82.8283	93	46.2366	208	88.9423	207	94.686	161	65.8385	192	38.0208	241	92.9461
T2A;A71C	109	29.3578	127	38.5827	231	93.5065	219	76.7123	132	49.2424	193	85.4922	262	98.4733	153	53.5948	151	41.0596	284	94.0141
T2A;A71G	125	23.2	111	29.7297	181	90.6077	175	76.5714	114	52.6316	200	83.5	198	96.9697	154	53.2468	152	23.6842	224	89.7321
T2A;A71T	110	12.7273	124	8.06452	176	81.8182	130	33.0769	110	28.1818	139	54.6763	217	87.0968	120	40	139	17.9856	195	71.7949
T2A;A72C	132	34.0909	118	31.3559	247	95.5466	194	76.8041	117	34.188	186	84.9462	268	95.8955	137	51.0949	152	35.5263	280	90.3571
T2A;A72G	94	25.5319	93	23.6559	134	94.0299	144	81.9444	93	44.086	123	84.5528	148	95.2703	116	56.8966	129	28.6822	132	93.1818
T2A;A72T	135	27.4074	162	37.037	200	92.5	208	82.6923	120	43.3333	204	85.7843	237	94.0928	161	58.3851	157	35.0318	254	96.8504
T2C;T3A	78	8.97436	53	18.8679	26	50	52	51.9231	57	19.2982	33	57.5758	36	66.6667	66	22.7273	78	19.2308	35	68.5714
T2C;T3C	47	8.51064	41	14.6341	46	58.6957	65	18.4615	47	6.38298	49	30.6122	58	67.2414	64	21.875	61	19.6721	49	32.6531
T2C;T3G	60	40	77	50.6494	53	94.3396	82	84.1463	56	67.8571	68	82.3529	57	78.9474	60	70	74	50	68	76.4706
T2C;C4A	55	9.09091	53	28.3019	37	67.5676	47	40.4255	30	40	21	42.8571	28	60.7143	54	42.5926	66	31.8182	41	70.7317
T2C;C4G	55	27.2727	60	66.6667	52	78.8462	73	65.7534	68	60.2941	45	86.6667	60	73.3333	75	68	107	57.0093	77	70.1299
T2C;C4T	43	9.30233	59	27.1186	37	64.8649	44	34.0909	35	22.8571	31	41.9355	26	46.1538	44	34.0909	71	28.169	29	58.6207
T2C;A5C	55	12.7273	65	15.3846	36	33.3333	65	13.8462	34	26.4706	46	23.913	49	28.5714	39	10.2564	48	12.5	41	21.9512
T2C;A5G	43	9.30233	50	20	51	80.3922	60	58.3333	41	17.0732	45	71.1111	51	74.5098	58	22.4138	50	12	33	78.7879
T2C;A5T	36	11.1111	40	7.5	4	25	24	12.5	26	7.69231	11	9.09091	8	25	20	20	45	4.44444	18	22.2222
T2C;G6A	94	59.5745	116	69.8276	79	87.3418	132	75.7576	121	81.8182	92	80.4348	102	95.098	97	71.134	137	77.3723	112	84.8214
T2C;G6C	53	39.6226	90	55.5556	64	78.125	85	75.2941	74	71.6216	63	60.3175	56	69.6429	68	64.7059	95	65.2632	72	69.4444
T2C;G6T	86	55.814	117	59.8291	89	93.2584	132	88.6364	111	71.1712	89	79.7753	94	84.0426	104	70.1923	150	78	116	84.4828
T2C;C7A	195	80	235	85.1064	160	91.25	189	86.2434	188	90.4255	166	86.747	159	89.3082	187	87.7005	256	83.5938	190	93.6842
T2C;C7G	82	50	105	71.4286	65	89.2308	113	81.4159	82	75.6098	109	85.3211	127	91.3386	102	73.5294	122	59.0164	83	87.9518
T2C;C7T	109	53.211	116	68.9655	106	88.6792	120	75.8333	119	74.7899	98	83.6735	114	87.7193	117	75.2137	144	65.2778	131	85.4962
T2C;C8A	90	24.4444	90	41.1111	115	83.4783	94	73.4043	80	41.25	102	73.5294	83	89.1566	96	46.875	101	24.7525	103	77.6699
T2C;C8G	92	59.7826	101	61.3861	82	90.2439	105	83.8095	72	80.5556	78	82.0513	91	94.5055	100	72	119	63.8655	82	93.9024
T2C;C8T	66	12.1212	72	25	74	81.0811	72	44.4444	52	21.1538	66	65.1515	104	89.4231	71	29.5775	68	22.0588	63	79.3651
T2C;G9A	120	6.66667	105	13.3333	68	39.7059	134	8.20896	106	9.43396	106	10.3774	67	29.8507	125	5.6	142	4.22535	107	16.8224
T2C;G9C	79	3.79747	105	4.7619	63	15.873	84	3.57143	84	10.7143	76	6.57895	66	15.1515	104	5.76923	137	6.56934	80	11.25
T2C;G9T	79	5.06329	83	3.61446	48	20.8333	99	8.08081	58	3.44828	59	8.47458	28	28.5714	71	4.22535	94	8.51064	50	4
T2C;G10A	133	9.02256	96	6.25	57	71.9298	130	19.2308	63	6.34921	84	26.1905	80	60	91	7.69231	131	15.2672	100	41
T2C;G10C	69	10.1449	65	6.15385	29	37.931	66	7.57576	68	14.7059	49	14.2857	47	42.5532	77	5.19481	82	4.87805	55	27.2727
T2C;G10T	91	1.0989	103	3.8835	53	22.6415	85	9.41176	80	6.25	65	10.7692	55	29.0909	82	6.09756	85	3.52941	74	18.9189
T2C;A11C	35	11.4286	31	6.45161	23	17.3913	41	14.6341	21	4.7619	34	23.5294	37	37.8378	51	11.7647	46	17.3913	40	22.5
T2C;A11G	43	25.5814	53	24.5283	43	72.093	70	57.1429	48	35.4167	35	71.4286	51	82.3529	42	28.5714	55	23.6364	49	75.5102
T2C;A11T	43	6.97674	66	4.54545	44	11.3636	52	5.76923	50	4	64	10.9375	27	37.037	70	4.28571	82	3.65854	53	20.7547
T2C;A12C	49	8.16327	62	3.22581	31	35.4839	67	5.97015	64	4.6875	48	4.16667	66	13.6364	67	13.4328	60	6.66667	56	14.2857
T2C;A12G	44	4.54545	50	8	28	67.8571	32	25	39	10.2564	31	32.2581	42	52.381	48	12.5	69	2.89855	41	36.5854
T2C;A12T	73	2.73973	83	1.20482	56	3.57143	70	17.1429	73	8.21918	70	12.8571	54	3.7037	61	3.27869	100	8	69	1.44928
T2C;G13A	92	10.8696	87	29.8851	39	74.359	70	60	65	38.4615	51	58.8235	65	81.5385	102	42.1569	105	20	64	78.125
T2C;G13C	70	5.71429	66	10.6061	24	41.6667	43	30.2326	46	8.69565	51	19.6078	33	57.5758	74	14.8649	87	8.04598	40	62.5
T2C;G13T	85	7.05882	91	14.2857	42	61.9048	82	41.4634	67	28.3582	68	38.2353	39	58.9744	76	9.21053	82	21.9512	66	60.6061
T2C;C14A	75	14.6667	61	18.0328	55	16.3636	52	9.61538	48	8.33333	59	11.8644	48	8.33333	45	6.66667	74	5.40541	57	10.5263
T2C;C14G	55	10.9091	49	14.2857	56	12.5	75	13.3333	59	20.339	38	15.7895	49	2.04082	74	5.40541	74	13.5135	46	6.52174
T2C;C14T	76	9.21053	80	7.5	40	10	84	7.14286	51	3.92157	55	10.9091	59	11.8644	69	13.0435	76	9.21053	70	11.4286
T2C;G15A	72	9.72222	72	8.33333	56	7.14286	102	3.92157	69	8.69565	66	10.6061	54	7.40741	86	3.48837	96	8.33333	105	8.57143
T2C;G15C	55	23.6364	56	16.0714	46	36.9565	60	31.6667	45	17.7778	60	25	51	29.4118	52	25	71	22.5352	61	42.623
T2C;G15T	65	35.3846	64	46.875	51	15.6863	76	43.4211	61	39.3443	56	35.7143	58	41.3793	76	18.4211	92	34.7826	68	42.6471
T2C;G16A	65	1.53846	66	7.57576	57	12.2807	66	12.1212	67	5.97015	59	1.69492	57	5.26316	77	5.19481	54	5.55556	75	2.66667
T2C;G16C	47	6.38298	55	21.8182	47	12.766	57	14.0351	50	10	55	23.6364	45	6.66667	56	16.0714	67	22.3881	75	20
T2C;G16T	68	7.35294	51	5.88235	49	0	61	19.6721	60	13.3333	39	17.9487	67	14.9254	51	5.88235	77	7.79221	42	7.14286
T2C;G17A	72	9.72222	99	15.1515	75	18.6667	103	10.6796	79	8.86076	67	11.9403	53	26.4151	98	11.2245	98	8.16327	104	9.61538
T2C;G17C	66	27.2727	60	43.3333	44	25	79	50.6329	62	22.5806	57	24.5614	51	43.1373	65	41.5385	63	33.3333	53	43.3962
T2C;G17T	54	3.7037	53	18.8679	49	16.3265	75	10.6667	48	16.6667	56	10.7143	53	45.283	65	12.3077	69	13.0435	52	13.4615
T2C;A18C	84	11.9048	72	9.72222	41	7.31707	80	6.25	53	15.0943	57	10.5263	50	10	72	6.94444	105	4.7619	89	6.74157
T2C;A18G	77	7.79221	100	20	69	15.942	92	5.43478	81	12.3457	83	3.61446	90	12.2222	86	11.6279	92	10.8696	83	19.2771
T2C;A18T	50	10	44	15.9091	48	12.5	70	12.8571	33	0	43	9.30233	38	13.1579	46	8.69565	45	13.3333	39	7.69231
T2C;C19A	73	13.6986	77	22.0779	80	21.25	71	12.6761	43	23.2558	62	17.7419	74	17.5676	73	17.8082	87	12.6437	58	15.5172
T2C;C19G	62	17.7419	63	4.7619	36	5.55556	66	6.06061	45	4.44444	41	12.1951	45	4.44444	63	20.6349	82	19.5122	57	5.26316
T2C;C19T	86	3.48837	73	6.84932	61	14.7541	81	6.17284	67	2.98507	66	3.0303	57	17.5439	75	9.33333	98	7.14286	66	6.06061
T2C;G20A	78	16.6667	63	17.4603	56	25	82	21.9512	62	16.129	68	17.6471	61	32.7869	87	9.1954	70	18.5714	60	25
T2C;G20C	62	12.9032	64	21.875	66	6.06061	90	3.33333	74	5.40541	81	7.40741	73	15.0685	85	3.52941	78	6.41026	79	5.06329
T2C;G20T	108	11.1111	97	15.4639	75	26.6667	110	11.8182	63	17.4603	72	8.33333	87	37.931	76	7.89474	110	18.1818	93	22.5806
T2C;A21C	91	8.79121	85	4.70588	66	16.6667	83	7.22892	83	14.4578	61	3.27869	58	8.62069	75	9.33333	99	8.08081	97	9.27835
T2C;A21G	56	8.92857	68	14.7059	39	74.359	57	22.807	67	5.97015	57	56.1404	46	80.4348	62	25.8065	64	21.875	62	67.7419
T2C;A21T	78	10.2564	78	10.2564	64	18.75	84	16.6667	62	11.2903	65	12.3077	65	26.1538	78	15.3846	70	11.4286	78	17.9487
T2C;C22A	63	3.1746	76	7.89474	61	18.0328	78	5.12821	53	15.0943	63	6.34921	66	16.6667	64	4.6875	92	9.78261	73	16.4384
T2C;C22G	44	9.09091	48	4.16667	31	0	51	9.80392	37	5.40541	43	2.32558	43	6.97674	43	6.97674	50	6	48	10.4167
T2C;C22T	83	7.22892	74	12.1622	36	11.1111	71	2.8169	50	12	61	1.63934	59	3.38983	55	3.63636	61	6.55738	48	6.25
T2C;C23A	50	8	47	8.51064	33	9.09091	57	7.01754	41	2.43902	55	7.27273	46	6.52174	63	11.1111	62	19.3548	43	2.32558
T2C;C23G	27	7.40741	29	62.069	31	45.1613	50	38	33	30.303	29	17.2414	23	30.4348	39	15.3846	47	21.2766	34	23.5294
T2C;C23T	65	9.23077	54	18.5185	48	2.08333	63	6.34921	52	21.1538	40	10	62	12.9032	77	3.8961	54	3.7037	65	7.69231
T2C;C24A	57	17.5439	52	23.0769	33	18.1818	38	5.26316	45	6.66667	33	6.06061	49	16.3265	51	3.92157	60	8.33333	35	8.57143
T2C;C24G	58	10.3448	71	12.6761	32	28.125	59	13.5593	52	3.84615	41	14.6341	44	13.6364	58	5.17241	74	8.10811	44	20.4545
T2C;C24T	64	31.25	48	33.3333	41	56.0976	58	32.7586	52	21.1538	56	48.2143	43	62.7907	62	43.5484	60	41.6667	56	48.2143
T2C;G25A	78	0	75	1.33333	75	6.66667	86	3.48837	74	4.05405	72	1.38889	69	5.7971	93	7.52688	97	6.18557	84	5.95238
T2C;G25C	85	8.23529	113	10.6195	106	13.2075	95	6.31579	86	12.7907	83	15.6627	85	21.1765	74	8.10811	131	9.92366	99	6.06061
T2C;G25T	83	7.22892	100	11	67	16.4179	102	15.6863	78	6.41026	67	5.97015	61	14.7541	88	6.81818	104	5.76923	94	8.51064
T2C;T26A	90	22.2222	96	19.7917	110	72.7273	121	19.8347	100	11	103	28.1553	112	75	97	23.7113	134	14.1791	131	52.6718
T2C;T26C	66	7.57576	93	8.60215	86	91.8605	106	60.3774	91	26.3736	80	76.25	106	85.8491	65	29.2308	92	11.9565	93	84.9462
T2C;T26G	85	14.1176	101	16.8317	71	71.831	97	20.6186	81	11.1111	73	21.9178	91	71.4286	91	14.2857	92	13.0435	89	50.5618
T2C;T27A	100	18	90	14.4444	116	81.0345	85	22.3529	96	16.6667	100	31	115	74.7826	84	9.52381	134	13.4328	104	58.6538
T2C;T27C	56	10.7143	50	12	63	87.3016	58	31.0345	52	21.1538	40	60	52	73.0769	50	10	58	13.7931	51	45.098
T2C;T27G	92	10.8696	88	13.6364	63	33.3333	85	21.1765	79	2.53165	89	15.7303	61	36.0656	71	11.2676	81	8.64198	73	15.0685
T2C;T28A	111	8.10811	93	15.0538	104	72.1154	90	20	102	13.7255	101	40.5941	139	79.8561	97	6.18557	119	10.9244	85	51.7647
T2C;T28C	57	3.50877	57	15.7895	30	63.3333	52	13.4615	35	5.71429	54	18.5185	45	42.2222	45	11.1111	63	11.1111	64	37.5
T2C;T28G	53	13.2075	66	10.6061	30	10	58	13.7931	45	11.1111	48	25	34	32.3529	50	8	58	12.069	44	22.7273
T2C;T29A	101	13.8614	100	11	96	69.7917	102	18.6275	83	20.4819	100	37	115	74.7826	75	14.6667	111	12.6126	106	50
T2C;T29C	74	28.3784	81	39.5062	100	80	105	70.4762	84	48.8095	87	70.1149	110	90.9091	81	59.2593	88	43.1818	113	84.9558
T2C;T29G	74	8.10811	74	9.45946	65	36.9231	71	12.6761	74	9.45946	70	20	92	38.0435	70	1.42857	92	10.8696	70	15.7143
T2C;C30A	94	10.6383	83	6.0241	68	54.4118	95	11.5789	81	18.5185	92	22.8261	83	61.4458	88	9.09091	97	9.27835	97	38.1443
T2C;C30G	64	3.125	75	2.66667	57	36.8421	59	6.77966	67	8.95522	63	20.6349	57	54.386	64	6.25	91	5.49451	73	26.0274
T2C;C30T	96	10.4167	125	16	70	75.7143	123	14.6341	84	22.619	93	37.6344	86	80.2326	114	13.1579	117	17.9487	86	51.1628
T2C;C31A	75	4	85	4.70588	32	37.5	73	10.9589	76	6.57895	50	14	25	52	83	3.61446	92	7.6087	58	29.3103
T2C;C31G	77	5.19481	78	15.3846	61	78.6885	71	15.493	57	8.77193	55	27.2727	75	69.3333	67	7.46269	91	13.1868	64	53.125
T2C;C31T	91	6.59341	80	16.25	40	60	88	17.0455	85	8.23529	69	26.087	52	78.8462	64	9.375	127	14.9606	61	54.0984
T2C;C32A	78	8.97436	71	7.04225	52	76.9231	80	32.5	73	9.58904	64	48.4375	64	75	64	21.875	86	9.30233	64	54.6875
T2C;C32G	69	18.8406	74	43.2432	47	85.1064	55	67.2727	59	47.4576	54	70.3704	73	87.6712	56	64.2857	79	39.2405	43	93.0233
T2C;C32T	104	10.5769	80	7.5	69	84.058	86	34.8837	76	11.8421	74	60.8108	63	84.127	79	16.4557	112	8.03571	79	74.6835
T2C;T33A	87	10.3448	114	14.0351	84	83.3333	105	40	101	20.7921	88	54.5455	85	83.5294	96	15.625	111	10.8108	98	76.5306
T2C;T33C	63	15.873	74	12.1622	69	76.8116	89	43.8202	86	23.2558	72	61.1111	102	78.4314	89	24.7191	77	19.4805	97	75.2577
T2C;T33G	79	15.1899	92	23.913	47	27.6596	85	15.2941	60	11.6667	50	20	54	20.3704	58	12.069	86	23.2558	74	14.8649
T2C;C34A	102	17.6471	122	17.2131	118	87.2881	116	49.1379	93	27.957	128	71.875	122	90.9836	96	21.875	102	20.5882	118	80.5085
T2C;C34G	98	19.3878	105	21.9048	85	90.5882	116	50	94	28.7234	111	58.5586	109	81.6514	98	34.6939	118	20.339	124	79.8387
T2C;C34T	117	6.83761	152	16.4474	111	83.7838	136	45.5882	125	12.8	117	59.8291	117	92.3077	121	26.4463	154	12.3377	134	78.3582
T2C;T35A	93	19.3548	74	24.3243	63	87.3016	95	34.7368	80	27.5	91	64.8352	93	89.2473	80	27.5	98	19.3878	83	79.5181
T2C;T35C	66	21.2121	78	21.7949	74	87.8378	88	45.4545	82	23.1707	76	65.7895	102	86.2745	79	36.7089	79	15.1899	90	74.4444
T2C;T35G	74	20.2703	78	21.7949	122	91.8033	120	49.1667	78	30.7692	89	65.1685	115	88.6957	94	27.6596	90	35.5556	107	85.0467
T2C;T36A	90	7.77778	87	12.6437	61	85.2459	73	32.8767	74	8.10811	69	56.5217	56	83.9286	72	37.5	91	7.69231	60	60
T2C;T36C	64	0	50	2	31	35.4839	61	11.4754	49	2.04082	35	25.7143	36	16.6667	50	8	66	9.09091	46	30.4348
T2C;T36G	54	31.4815	70	21.4286	73	95.8904	105	85.7143	62	51.6129	78	79.4872	76	90.7895	82	67.0732	94	38.2979	91	84.6154
T2C;T37A	87	9.1954	77	3.8961	52	73.0769	76	30.2632	70	10	54	44.4444	42	57.1429	72	22.2222	78	6.41026	58	62.069
T2C;T37C	54	11.1111	49	18.3673	44	56.8182	53	26.4151	43	25.5814	36	22.2222	47	53.1915	51	15.6863	72	15.2778	32	34.375
T2C;T37G	73	12.3288	73	27.3973	53	73.5849	59	74.5763	64	28.125	51	78.4314	51	84.3137	67	32.8358	69	21.7391	70	81.4286
T2C;C38A	78	1.28205	101	3.9604	44	59.0909	98	29.5918	60	15	64	43.75	44	84.0909	76	10.5263	75	5.33333	66	48.4848
T2C;C38G	87	13.7931	88	10.2273	47	76.5957	78	42.3077	64	9.375	74	58.1081	47	70.2128	66	10.6061	109	11.0092	84	66.6667
T2C;C38T	92	7.6087	79	5.06329	44	63.6364	47	19.1489	98	9.18367	49	34.6939	44	77.2727	83	7.22892	83	12.0482	51	64.7059
T2C;A39C	64	4.6875	60	16.6667	45	75.5556	62	14.5161	59	11.8644	37	29.7297	57	78.9474	67	11.9403	77	5.19481	55	60
T2C;A39G	79	8.86076	77	12.987	43	58.1395	74	20.2703	61	21.3115	67	23.8806	44	79.5455	60	21.6667	92	17.3913	72	62.5
T2C;A39T	77	14.2857	100	12	97	80.4124	93	45.1613	84	22.619	84	54.7619	85	74.1176	66	12.1212	128	21.875	116	72.4138
T2C;T40A	71	4.22535	79	8.86076	44	79.5455	89	24.7191	86	9.30233	57	40.3509	43	69.7674	69	4.34783	99	12.1212	56	57.1429
T2C;T40C	66	10.6061	81	12.3457	54	77.7778	71	30.9859	54	22.2222	57	57.8947	51	74.5098	55	9.09091	71	12.6761	66	65.1515
T2C;T40G	65	13.8462	80	10	46	54.3478	68	20.5882	63	9.52381	61	34.4262	53	77.3585	55	9.09091	67	7.46269	50	50
T2C;T41A	77	7.79221	84	8.33333	51	76.4706	62	40.3226	65	9.23077	46	43.4783	63	73.0159	67	14.9254	85	11.7647	59	59.322
T2C;T41C	56	12.5	70	8.57143	37	75.6757	87	29.8851	55	7.27273	44	43.1818	43	65.1163	65	13.8462	66	13.6364	49	69.3878
T2C;T41G	72	5.55556	66	6.06061	41	65.8537	86	11.6279	46	10.8696	41	24.3902	54	51.8519	62	12.9032	90	12.2222	53	24.5283
T2C;G42A	78	6.41026	87	9.1954	61	65.5738	83	31.3253	70	15.7143	60	48.3333	59	67.7966	81	20.9877	112	9.82143	60	48.3333
T2C;G42C	90	10	86	15.1163	64	84.375	70	41.4286	78	12.8205	75	32	60	78.3333	90	15.5556	104	14.4231	86	68.6047
T2C;G42T	107	8.41121	117	10.2564	79	60.7595	96	37.5	93	16.129	74	56.7568	85	67.0588	103	16.5049	142	10.5634	89	65.1685
T2C;C43A	86	2.32558	91	5.49451	72	52.7778	105	6.66667	85	8.23529	73	21.9178	79	73.4177	82	6.09756	125	5.6	112	37.5
T2C;C43G	68	13.2353	93	13.9785	57	35.0877	81	11.1111	71	4.22535	72	6.94444	65	38.4615	78	7.69231	97	7.21649	79	13.9241
T2C;C43T	86	4.65116	107	12.1495	48	70.8333	93	31.1828	93	10.7527	79	41.7722	58	75.8621	77	18.1818	110	13.6364	73	61.6438
T2C;G44A	111	6.30631	121	3.30579	72	26.3889	98	6.12245	78	8.97436	80	6.25	59	33.8983	85	7.05882	116	3.44828	82	14.6341
T2C;G44C	75	20	81	24.6914	84	72.619	88	47.7273	73	24.6575	80	52.5	94	82.9787	70	28.5714	100	23	96	70.8333
T2C;G44T	98	4.08163	100	13	60	66.6667	102	15.6863	84	14.2857	74	20.2703	63	57.1429	100	8	101	6.93069	90	56.6667
T2C;C45A	92	9.78261	87	5.74713	62	9.67742	120	7.5	78	1.28205	83	10.8434	82	17.0732	72	5.55556	100	8	88	18.1818
T2C;C45G	61	4.91803	86	4.65116	43	25.5814	71	4.22535	58	8.62069	59	8.47458	49	48.9796	58	3.44828	81	9.87654	54	16.6667
T2C;C45T	107	3.73832	74	8.10811	48	47.9167	56	33.9286	49	20.4082	51	23.5294	50	60	75	9.33333	102	5.88235	54	42.5926
T2C;G46A	73	26.0274	93	35.4839	42	64.2857	74	67.5676	78	44.8718	49	69.3878	57	84.2105	69	53.6232	103	38.835	63	82.5397
T2C;G46C	113	12.3894	93	11.828	64	37.5	83	10.8434	67	11.9403	83	13.253	66	43.9394	110	7.27273	116	15.5172	83	21.6867
T2C;G46T	96	21.875	78	29.4872	55	18.1818	81	14.8148	89	19.1011	51	15.6863	79	20.2532	102	22.549	96	13.5417	90	18.8889
T2C;G47A	104	30.7692	85	35.2941	60	55	118	33.0508	72	31.9444	68	32.3529	88	55.6818	91	30.7692	96	28.125	99	35.3535
T2C;G47C	79	34.1772	83	37.3494	50	34	60	35	65	32.3077	70	24.2857	80	48.75	58	22.4138	75	30.6667	82	42.6829
T2C;G47T	79	34.1772	116	42.2414	69	52.1739	116	31.8966	75	37.3333	91	43.956	89	65.1685	84	27.381	104	32.6923	71	49.2958
T2C;G48A	90	14.4444	76	17.1053	56	7.14286	83	18.0723	65	13.8462	84	8.33333	60	20	95	11.5789	89	12.3596	67	10.4478
T2C;G48C	72	54.1667	113	68.1416	75	46.6667	82	68.2927	83	73.494	70	67.1429	60	66.6667	100	64	98	74.4898	79	72.1519
T2C;G48T	133	55.6391	95	62.1053	93	49.4624	98	56.1224	96	65.625	88	47.7273	89	57.3034	131	45.8015	144	54.8611	92	52.1739
T2C;G49A	106	8.49057	91	13.1868	84	23.8095	91	18.6813	68	7.35294	90	18.8889	68	33.8235	99	10.101	123	16.2602	106	11.3208
T2C;G49C	84	2.38095	98	12.2449	53	3.77358	106	6.60377	64	4.6875	71	8.4507	69	17.3913	94	7.44681	114	6.14035	75	8
T2C;G49T	93	4.30108	97	10.3093	82	2.43902	138	5.7971	89	6.74157	103	10.6796	90	8.88889	105	1.90476	117	5.12821	93	10.7527
T2C;A50C	86	12.7907	47	8.51064	42	7.14286	75	4	46	4.34783	40	2.5	35	8.57143	64	7.8125	79	7.59494	59	18.6441
T2C;A50G	62	9.67742	70	12.8571	55	50.9091	63	20.6349	54	7.40741	62	27.4194	47	61.7021	55	9.09091	91	14.2857	55	29.0909
T2C;A50T	89	10.1124	94	11.7021	57	15.7895	93	13.9785	89	10.1124	68	7.35294	71	11.2676	82	4.87805	105	12.381	89	8.98876
T2C;C51A	54	18.5185	68	25	58	39.6552	81	27.1605	72	29.1667	49	34.6939	54	31.4815	89	19.1011	89	20.2247	73	26.0274
T2C;C51G	72	26.3889	57	38.5965	59	33.8983	62	32.2581	75	30.6667	52	21.1538	54	29.6296	70	38.5714	84	22.619	79	34.1772
T2C;C51T	59	5.08475	73	15.0685	44	43.1818	45	35.5556	56	19.6429	50	30	39	43.5897	67	16.4179	85	16.4706	64	28.125
T2C;G52A	72	8.33333	81	14.8148	48	16.6667	41	26.8293	57	21.0526	54	22.2222	67	23.8806	59	18.6441	98	11.2245	61	26.2295
T2C;G52C	91	15.3846	71	8.4507	54	11.1111	95	10.5263	53	22.6415	49	14.2857	61	4.91803	80	11.25	90	7.77778	78	8.97436
T2C;G52T	62	6.45161	74	8.10811	63	6.34921	85	7.05882	65	10.7692	63	4.7619	61	19.6721	96	6.25	78	12.8205	78	7.69231
T2C;A53C	106	13.2075	110	8.18182	65	23.0769	69	11.5942	71	8.4507	81	14.8148	63	28.5714	83	7.22892	79	10.1266	102	16.6667
T2C;A53G	85	8.23529	71	7.04225	57	49.1228	60	13.3333	65	9.23077	68	16.1765	47	57.4468	73	5.47945	74	5.40541	62	40.3226
T2C;A53T	92	17.3913	76	21.0526	74	9.45946	110	8.18182	86	4.65116	84	9.52381	101	16.8317	71	11.2676	98	13.2653	86	8.13953
T2C;C54A	82	13.4146	67	10.4478	37	5.40541	77	3.8961	49	18.3673	64	14.0625	72	19.4444	71	9.85915	91	12.0879	59	20.339
T2C;C54G	61	9.83607	63	12.6984	39	12.8205	53	3.77358	45	8.88889	57	12.2807	57	14.0351	69	11.5942	68	13.2353	75	13.3333
T2C;C54T	94	7.44681	84	7.14286	72	6.94444	102	10.7843	89	5.61798	99	12.1212	84	3.57143	90	7.77778	140	6.42857	90	4.44444
T2C;C55A	80	40	67	47.7612	49	48.9796	75	50.6667	64	50	62	41.9355	56	41.0714	76	30.2632	90	42.2222	75	46.6667
T2C;C55G	57	47.3684	41	51.2195	32	31.25	60	50	33	39.3939	45	44.4444	54	33.3333	46	36.9565	52	44.2308	59	37.2881
T2C;C55T	86	48.8372	71	59.1549	52	75	89	56.1798	53	62.2642	50	64	70	71.4286	72	45.8333	88	40.9091	67	62.6866
T2C;C56A	58	48.2759	65	41.5385	47	46.8085	72	44.4444	41	46.3415	44	50	70	57.1429	74	45.9459	73	52.0548	61	59.0164
T2C;C56G	42	2.38095	61	0	36	11.1111	46	10.8696	59	11.8644	55	5.45455	41	24.3902	53	0	70	2.85714	46	10.8696
T2C;C56T	54	20.3704	84	15.4762	68	58.8235	82	29.2683	68	22.0588	59	30.5085	70	64.2857	69	20.2899	90	24.4444	79	41.7722
T2C;T57A	64	12.5	60	6.66667	47	57.4468	74	21.6216	62	6.45161	60	20	39	58.9744	82	10.9756	82	14.6341	58	20.6897
T2C;T57C	67	5.97015	109	19.2661	38	71.0526	55	43.6364	63	11.1111	54	46.2963	48	66.6667	92	13.0435	95	14.7368	62	77.4194
T2C;T57G	60	6.66667	68	7.35294	40	37.5	71	15.493	62	14.5161	57	14.0351	47	61.7021	68	16.1765	103	11.6505	67	37.3134
T2C;G58A	77	20.7792	82	41.4634	51	62.7451	61	45.9016	65	26.1538	61	49.1803	61	72.1311	72	34.7222	87	24.1379	59	62.7119
T2C;G58C	76	46.0526	67	31.3433	66	77.2727	74	56.7568	54	42.5926	64	60.9375	49	79.5918	73	41.0959	74	36.4865	51	80.3922
T2C;G58T	106	39.6226	109	33.945	106	80.1887	109	59.633	73	45.2055	71	61.9718	95	82.1053	112	41.0714	94	32.9787	86	75.5814
T2C;C59A	72	9.72222	82	13.4146	65	27.6923	80	12.5	68	10.2941	57	17.5439	85	25.8824	67	13.4328	103	12.6214	75	16
T2C;C59G	65	4.61538	62	11.2903	55	25.4545	60	15	43	2.32558	41	14.6341	42	40.4762	59	8.47458	76	6.57895	48	10.4167
T2C;C59T	73	17.8082	77	10.3896	72	45.8333	83	15.6627	72	5.55556	58	22.4138	61	52.459	95	9.47368	89	7.86517	54	27.7778
T2C;A60C	87	8.04598	94	6.38298	73	65.7534	100	24	58	3.44828	52	34.6154	58	79.3103	75	9.33333	82	4.87805	72	51.3889
T2C;A60G	73	9.58904	78	17.9487	40	77.5	78	37.1795	59	18.6441	46	65.2174	62	66.129	71	29.5775	75	12	66	63.6364
T2C;A60T	95	4.21053	110	9.09091	69	34.7826	97	13.4021	74	9.45946	96	22.9167	88	43.1818	88	11.3636	88	10.2273	101	23.7624
T2C;G61A	104	9.61538	82	8.53659	58	63.7931	84	38.0952	67	14.9254	56	51.7857	64	53.125	79	18.9873	109	4.58716	72	51.3889
T2C;G61C	83	13.253	99	19.1919	90	85.5556	90	55.5556	86	31.3953	86	76.7442	112	79.4643	100	42	107	22.4299	79	77.2152
T2C;G61T	98	9.18367	84	9.52381	89	73.0337	88	34.0909	79	11.3924	65	55.3846	77	68.8312	75	18.6667	97	16.4948	78	65.3846
T2C;A62C	116	45.6897	86	46.5116	83	92.7711	115	91.3043	92	63.0435	113	90.2655	110	96.3636	118	75.4237	111	54.955	124	92.7419
T2C;A62G	57	22.807	71	40.8451	42	80.9524	69	65.2174	65	49.2308	42	52.381	40	82.5	51	56.8627	104	51.9231	54	79.6296
T2C;A62T	93	31.1828	94	44.6809	94	85.1064	132	60.6061	102	41.1765	98	73.4694	140	90	95	48.4211	93	39.7849	144	77.0833
T2C;G63A	106	11.3208	135	10.3704	136	79.4118	128	39.8438	99	10.101	122	43.4426	163	80.3681	115	19.1304	162	10.4938	183	67.2131
T2C;G63C	102	17.6471	124	19.3548	154	85.0649	125	35.2	83	25.3012	134	58.9552	177	85.8757	104	21.1538	130	6.92308	175	74.8571
T2C;G63T	111	5.40541	114	7.01754	101	87.1287	90	43.3333	85	11.7647	112	66.0714	116	88.7931	107	5.60748	122	5.7377	109	79.8165
T2C;A64C	81	12.3457	79	15.1899	119	84.0336	78	32.0513	74	8.10811	84	50	136	86.7647	77	14.2857	88	9.09091	157	74.5223
T2C;A64G	77	38.961	86	37.2093	94	86.1702	107	74.7664	74	39.1892	77	76.6234	94	87.234	102	49.0196	86	43.0233	98	82.6531
T2C;A64T	81	7.40741	84	10.7143	94	79.7872	95	40	62	20.9677	86	66.2791	87	90.8046	88	12.5	90	8.88889	115	79.1304
T2C;G65A	69	1.44928	62	3.22581	80	83.75	114	55.2632	49	12.2449	97	70.1031	119	85.7143	56	17.8571	57	5.26316	96	85.4167
T2C;G65C	45	4.44444	37	0	56	76.7857	36	27.7778	29	6.89655	45	40	69	86.9565	35	17.1429	50	2	45	68.8889
T2C;G65T	52	1.92308	42	4.7619	87	80.4598	70	38.5714	50	8	63	46.0317	101	82.1782	50	6	77	9.09091	64	71.875
T2C;G66A	66	1.51515	55	0	67	91.0448	81	39.5062	51	13.7255	82	63.4146	89	86.5169	79	20.2532	86	8.13953	87	75.8621
T2C;G66C	66	9.09091	90	12.2222	123	97.561	134	78.3582	73	24.6575	122	81.1475	112	91.9643	101	42.5743	72	8.33333	138	88.4058
T2C;G66T	87	9.1954	84	11.9048	81	88.8889	119	68.9076	68	26.4706	93	69.8925	86	90.6977	77	29.8701	86	13.9535	76	88.1579
T2C;C67A	61	24.5902	60	16.6667	49	85.7143	46	50	53	32.0755	44	56.8182	44	81.8182	51	25.4902	58	15.5172	40	65
T2C;C67G	55	5.45455	47	19.1489	18	55.5556	36	58.3333	66	22.7273	45	53.3333	28	71.4286	46	10.8696	65	10.7692	34	47.0588
T2C;C67T	53	11.3208	57	24.5614	38	71.0526	48	45.8333	50	18	47	46.8085	36	83.3333	63	22.2222	64	14.0625	44	72.7273
T2C;T68A	48	8.33333	61	18.0328	46	73.913	72	55.5556	44	9.09091	42	73.8095	56	76.7857	67	34.3284	74	9.45946	58	74.1379
T2C;T68C	53	15.0943	32	3.125	32	59.375	43	53.4884	36	16.6667	54	46.2963	51	82.3529	55	23.6364	47	8.51064	56	80.3571
T2C;T68G	46	4.34783	45	4.44444	22	45.4545	36	27.7778	32	0	28	14.2857	31	51.6129	38	7.89474	49	2.04082	29	48.2759
T2C;G69A	71	18.3099	68	11.7647	85	85.8824	88	57.9545	70	18.5714	73	78.0822	91	84.6154	66	28.7879	77	18.1818	84	86.9048
T2C;G69C	43	16.2791	53	16.9811	67	86.5672	49	67.3469	42	30.9524	59	67.7966	70	92.8571	55	23.6364	46	15.2174	71	91.5493
T2C;G69T	52	21.1538	74	28.3784	75	86.6667	75	60	56	26.7857	59	81.3559	65	83.0769	76	23.6842	74	24.3243	72	65.2778
T2C;A70C	25	12	32	6.25	41	85.3659	36	44.4444	22	13.6364	39	66.6667	51	86.2745	29	13.7931	26	11.5385	56	89.2857
T2C;A70G	57	12.2807	73	15.0685	73	84.9315	89	61.7978	52	23.0769	57	70.1754	78	93.5897	65	26.1538	78	8.97436	86	83.7209
T2C;A70T	42	7.14286	48	31.25	64	81.25	70	61.4286	41	17.0732	80	65	57	82.4561	61	21.3115	57	15.7895	64	84.375
T2C;A71C	50	10	63	12.6984	64	79.6875	95	41.0526	52	13.4615	71	67.6056	74	81.0811	51	27.451	55	10.9091	71	73.2394
T2C;A71G	101	11.8812	79	16.4557	102	58.8235	83	14.4578	67	14.9254	92	31.5217	124	72.5806	88	20.4545	110	7.27273	92	44.5652
T2C;A71T	63	3.1746	68	8.82353	56	71.4286	68	20.5882	49	6.12245	69	56.5217	68	82.3529	73	13.6986	94	9.57447	58	70.6897
T2C;A72C	95	10.5263	104	9.61538	146	83.5616	109	40.367	91	16.4835	129	65.1163	160	89.375	85	22.3529	113	15.9292	153	77.1242
T2C;A72G	59	6.77966	69	13.0435	136	90.4412	94	46.8085	49	12.2449	107	70.0935	114	92.9825	84	22.619	91	18.6813	137	86.8613
T2C;A72T	81	18.5185	74	14.8649	91	91.2088	76	39.4737	66	19.697	74	66.2162	100	90	63	23.8095	76	15.7895	102	76.4706
T2G;T3A	46	13.0435	68	14.7059	36	77.7778	41	53.6585	50	24	53	56.6038	33	87.8788	48	41.6667	92	26.087	48	70.8333
T2G;T3C	69	26.087	58	25.8621	48	83.3333	77	84.4156	57	47.3684	56	78.5714	40	92.5	65	52.3077	80	27.5	85	83.5294
T2G;T3G	72	18.0556	70	18.5714	49	83.6735	62	64.5161	50	32	60	81.6667	56	80.3571	65	32.3077	98	19.3878	67	76.1194
T2G;C4A	61	22.9508	89	21.3483	38	65.7895	49	63.2653	42	28.5714	49	40.8163	42	66.6667	57	31.5789	81	27.1605	44	65.9091
T2G;C4G	130	46.9231	119	57.1429	89	77.5281	137	81.0219	127	70.8661	121	74.3802	113	85.8407	123	80.4878	174	60.9195	140	83.5714
T2G;C4T	92	26.087	101	39.604	76	81.5789	114	61.4035	78	60.2564	87	70.1149	84	76.1905	86	44.186	116	42.2414	85	68.2353
T2G;A5C	74	39.1892	47	48.9362	44	70.4545	64	57.8125	32	37.5	52	55.7692	52	65.3846	47	42.5532	61	44.2623	60	80
T2G;A5G	72	51.3889	73	46.5753	39	64.1026	72	59.7222	81	59.2593	48	52.0833	66	57.5758	61	45.9016	109	52.2936	68	66.1765
T2G;A5T	32	6.25	34	26.4706	9	77.7778	16	0	17	29.4118	12	33.3333	7	85.7143	31	16.129	23	17.3913	15	40
T2G;G6A	170	74.7059	181	85.0829	161	89.441	185	81.6216	157	79.6178	150	82.6667	125	90.4	189	78.836	218	81.1927	163	85.8896
T2G;G6C	103	69.9029	111	79.2793	82	76.8293	127	68.5039	113	72.5664	107	79.4393	89	79.7753	115	71.3043	125	68.8	105	79.0476
T2G;G6T	147	57.1429	151	63.5762	96	86.4583	139	78.4173	99	66.6667	119	74.7899	124	84.6774	148	56.7568	166	64.4578	113	86.7257
T2G;C7A	62	33.871	59	45.7627	53	60.3774	69	66.6667	66	66.6667	61	52.459	87	65.5172	81	48.1481	102	48.0392	59	72.8814
T2G;C7G	56	64.2857	86	60.4651	45	71.1111	67	74.6269	74	74.3243	55	56.3636	68	80.8824	90	62.2222	98	63.2653	71	83.0986
T2G;C7T	86	40.6977	140	51.4286	80	78.75	112	75	114	59.6491	84	71.4286	119	68.9076	131	53.4351	125	50.4	106	79.2453
T2G;C8A	161	53.4161	160	60	147	88.4354	159	90.566	167	77.2455	169	89.9408	165	90.303	128	72.6562	181	67.4033	187	86.0963
T2G;C8G	56	41.0714	53	45.283	57	59.6491	67	58.209	49	65.3061	52	78.8462	58	70.6897	65	63.0769	81	54.321	52	65.3846
T2G;C8T	133	47.3684	152	50.6579	155	90.9677	160	79.375	131	58.7786	135	82.2222	151	88.0795	119	59.6639	144	50.6944	158	89.2405
T2G;G9A	111	13.5135	116	13.7931	80	52.5	83	12.0482	84	11.9048	69	18.8406	84	64.2857	86	17.4419	106	11.3208	102	29.4118
T2G;G9C	124	12.0968	93	11.828	78	15.3846	101	15.8416	94	11.7021	102	10.7843	80	15	86	12.7907	125	17.6	106	14.1509
T2G;G9T	131	6.87023	112	11.6071	79	37.9747	99	12.1212	110	9.09091	98	6.12245	87	47.1264	111	11.7117	136	6.61765	113	23.8938
T2G;G10A	147	14.966	131	16.0305	127	60.6299	135	22.2222	96	17.7083	120	31.6667	131	73.2824	136	14.7059	153	18.3007	135	49.6296
T2G;G10C	110	20.9091	84	27.381	53	50.9434	91	23.0769	87	16.092	59	10.1695	84	47.619	60	20	83	18.0723	86	32.5581
T2G;G10T	103	10.6796	105	10.4762	70	44.2857	100	21	75	10.6667	81	7.40741	87	47.1264	124	11.2903	116	7.75862	92	29.3478
T2G;A11C	62	12.9032	55	20	62	29.0323	48	25	34	17.6471	62	19.3548	42	30.9524	58	10.3448	69	11.5942	42	33.3333
T2G;A11G	102	24.5098	76	43.4211	80	81.25	95	83.1579	63	34.9206	101	81.1881	110	84.5455	93	61.2903	87	47.1264	119	84.0336
T2G;A11T	89	10.1124	73	16.4384	55	36.3636	59	30.5085	57	12.2807	71	19.7183	61	54.0984	71	15.493	71	4.22535	76	26.3158
T2G;A12C	74	6.75676	72	2.77778	51	29.4118	65	15.3846	62	12.9032	58	10.3448	48	29.1667	66	7.57576	53	7.54717	55	30.9091
T2G;A12G	86	10.4651	67	25.3731	65	75.3846	84	44.0476	52	17.3077	76	50	100	79	64	26.5625	76	14.4737	106	66.9811
T2G;A12T	99	10.101	70	5.71429	65	18.4615	80	6.25	78	3.84615	63	7.93651	77	24.6753	85	14.1176	101	13.8614	61	16.3934
T2G;G13A	160	53.75	170	65.2941	142	89.4366	172	81.3953	128	75	138	84.7826	145	85.5172	175	71.4286	206	66.5049	161	86.9565
T2G;G13C	94	17.0213	81	24.6914	64	73.4375	79	31.6456	86	29.0698	69	46.3768	87	67.8161	112	25	109	25.6881	84	54.7619
T2G;G13T	135	21.4815	149	20.8054	73	75.3425	117	55.5556	91	38.4615	99	55.5556	103	79.6117	114	43.8596	132	32.5758	119	68.9076
T2G;C14A	178	69.6629	151	57.6159	88	44.3182	142	62.6761	104	62.5	102	60.7843	88	38.6364	131	54.1985	146	61.6438	114	49.1228
T2G;C14G	144	56.9444	103	58.2524	60	38.3333	102	52.9412	82	59.7561	75	48	58	43.1034	112	50	115	59.1304	89	53.9326
T2G;C14T	105	25.7143	92	31.5217	70	28.5714	112	25.8929	92	20.6522	94	28.7234	100	38	99	24.2424	119	38.6555	95	33.6842
T2G;G15A	117	15.3846	66	10.6061	51	13.7255	89	12.3596	79	11.3924	90	8.88889	66	25.7576	97	16.4948	102	7.84314	86	12.7907
T2G;G15C	74	37.8378	66	34.8485	60	41.6667	81	24.6914	65	32.3077	53	28.3019	67	53.7313	80	28.75	99	34.3434	79	25.3165
T2G;G15T	104	6.73077	124	13.7097	69	23.1884	73	24.6575	89	8.98876	82	13.4146	75	29.3333	81	12.3457	97	7.21649	80	16.25
T2G;G16A	100	9	89	15.7303	49	16.3265	102	12.7451	68	17.6471	76	26.3158	66	12.1212	72	16.6667	92	9.78261	95	24.2105
T2G;G16C	86	27.907	66	33.3333	65	29.2308	75	25.3333	53	35.8491	48	27.0833	59	30.5085	90	27.7778	93	22.5806	76	18.4211
T2G;G16T	132	17.4242	102	14.7059	78	23.0769	126	16.6667	79	27.8481	77	19.4805	88	22.7273	81	16.0494	122	20.4918	101	19.802
T2G;G17A	125	12.8	122	19.6721	98	28.5714	97	34.0206	102	17.6471	99	20.202	94	38.2979	108	21.2963	115	12.1739	120	24.1667
T2G;G17C	77	46.7532	82	50	60	51.6667	78	47.4359	86	54.6512	57	49.1228	58	62.069	93	39.7849	98	40.8163	93	56.9892
T2G;G17T	147	14.2857	102	26.4706	79	27.8481	105	24.7619	90	18.8889	94	17.0213	87	43.6782	97	25.7732	143	20.979	89	17.9775
T2G;A18C	86	10.4651	68	8.82353	62	12.9032	82	12.1951	65	10.7692	65	16.9231	69	17.3913	61	1.63934	94	14.8936	56	8.92857
T2G;A18G	104	13.4615	119	10.9244	79	13.9241	115	14.7826	104	13.4615	86	18.6047	101	10.8911	90	13.3333	109	18.3486	99	13.1313
T2G;A18T	63	15.873	43	11.6279	45	11.1111	45	4.44444	41	4.87805	28	10.7143	47	0	39	12.8205	51	9.80392	56	12.5
T2G;C19A	138	50.7246	137	51.8248	76	30.2632	125	50.4	108	51.8519	83	50.6024	104	58.6538	140	31.4286	151	50.3311	120	42.5
T2G;C19G	82	31.7073	88	34.0909	65	32.3077	100	32	80	30	67	31.3433	96	27.0833	84	29.7619	113	30.0885	93	26.8817
T2G;C19T	96	15.625	107	29.9065	76	23.6842	99	29.2929	86	29.0698	74	18.9189	101	40.5941	86	15.1163	108	25.9259	99	29.2929
T2G;G20A	130	36.9231	116	44.8276	98	43.8776	136	52.2059	102	48.0392	99	38.3838	106	53.7736	137	34.3066	163	45.3988	136	50.7353
T2G;G20C	105	18.0952	94	21.2766	60	16.6667	94	24.4681	97	17.5258	89	10.1124	91	26.3736	97	12.3711	131	12.2137	124	16.9355
T2G;G20T	109	38.5321	149	34.8993	85	34.1176	156	39.1026	100	46	104	38.4615	111	44.1441	122	36.8852	160	40	149	39.5973
T2G;A21C	101	6.93069	72	6.94444	54	24.0741	87	13.7931	57	12.2807	81	11.1111	85	24.7059	99	10.101	100	8	75	20
T2G;A21G	86	33.7209	100	36	100	77	89	38.2022	67	34.3284	96	72.9167	129	89.1473	83	31.3253	99	28.2828	115	73.0435
T2G;A21T	86	15.1163	82	13.4146	66	33.3333	82	13.4146	66	19.697	63	15.873	84	40.4762	80	15	79	17.7215	82	17.0732
T2G;C22A	104	34.6154	88	42.0455	72	36.1111	104	25	83	22.8916	58	31.0345	106	50	72	41.6667	127	31.4961	80	27.5
T2G;C22G	74	9.45946	60	13.3333	51	17.6471	57	12.2807	44	27.2727	74	9.45946	53	9.43396	60	11.6667	56	25	68	7.35294
T2G;C22T	101	21.7822	103	31.068	91	25.2747	91	31.8681	92	26.087	75	16	84	28.5714	90	21.1111	121	29.7521	112	16.0714
T2G;C23A	85	30.5882	76	42.1053	70	28.5714	71	32.3944	72	41.6667	53	41.5094	76	34.2105	88	21.5909	86	36.0465	86	33.7209
T2G;C23G	87	49.4253	117	72.6496	77	54.5455	91	52.7473	86	69.7674	75	57.3333	86	65.1163	104	66.3462	114	67.5439	88	48.8636
T2G;C23T	82	26.8293	88	27.2727	73	31.5068	83	32.5301	72	31.9444	72	18.0556	79	34.1772	75	17.3333	126	31.746	97	24.7423
T2G;C24A	93	35.4839	97	50.5155	70	31.4286	81	29.6296	74	40.5405	61	44.2623	85	47.0588	86	25.5814	107	47.6636	100	44
T2G;C24G	93	44.086	93	52.6882	67	47.7612	80	47.5	95	56.8421	68	42.6471	55	61.8182	85	49.4118	100	49	79	51.8987
T2G;C24T	97	58.7629	95	60	93	62.3656	117	64.1026	69	47.8261	65	58.4615	88	76.1364	99	53.5354	99	50.5051	93	61.2903
T2G;G25A	104	11.5385	124	20.9677	90	20	121	9.09091	92	15.2174	91	23.0769	99	30.303	104	17.3077	133	11.2782	96	23.9583
T2G;G25C	115	13.913	84	10.7143	84	30.9524	141	13.4752	70	20	98	13.2653	110	24.5455	91	15.3846	126	19.8413	118	17.7966
T2G;G25T	117	15.3846	122	19.6721	87	27.5862	122	25.4098	98	21.4286	103	21.3592	107	52.3364	118	22.0339	111	19.8198	128	32.0312
T2G;T26A	143	23.7762	136	39.7059	161	79.5031	146	28.7671	96	38.5417	128	45.3125	210	77.619	155	21.9355	155	28.3871	145	72.4138
T2G;T26C	125	28.8	97	38.1443	144	85.4167	135	71.8519	66	28.7879	125	80	129	92.2481	110	43.6364	117	34.188	148	81.7568
T2G;T26G	115	35.6522	121	38.0165	113	73.4513	126	43.6508	92	31.5217	95	46.3158	159	81.1321	102	26.4706	119	31.9328	169	58.5799
T2G;T27A	117	18.8034	93	27.957	166	79.5181	115	31.3043	130	9.23077	137	55.4745	184	85.3261	96	30.2083	125	26.4	153	64.7059
T2G;T27C	72	40.2778	78	33.3333	101	87.1287	93	63.4409	75	36	99	77.7778	106	86.7925	90	25.5556	73	27.3973	122	75.4098
T2G;T27G	87	16.092	105	18.0952	91	47.2527	89	17.9775	97	19.5876	95	24.2105	88	39.7727	93	9.67742	103	6.79612	104	31.7308
T2G;T28A	123	28.4553	95	15.7895	157	75.7962	137	33.5766	88	19.3182	121	39.6694	175	80.5714	119	31.9328	155	16.129	133	65.4135
T2G;T28C	94	28.7234	108	29.6296	105	60.9524	85	27.0588	70	21.4286	77	32.4675	83	65.0602	72	19.4444	96	23.9583	86	60.4651
T2G;T28G	94	48.9362	81	55.5556	69	50.7246	85	44.7059	83	49.3976	70	51.4286	90	48.8889	85	37.6471	112	53.5714	68	60.2941
T2G;T29A	101	20.7921	118	14.4068	123	66.6667	115	24.3478	82	12.1951	102	37.2549	141	77.305	77	22.0779	114	8.77193	151	55.6291
T2G;T29C	91	31.8681	78	38.4615	93	83.871	91	56.044	77	50.6494	90	73.3333	105	93.3333	90	38.8889	85	35.2941	118	73.7288
T2G;T29G	82	12.1951	76	7.89474	84	42.8571	76	9.21053	69	8.69565	64	9.375	78	46.1538	74	16.2162	78	10.2564	72	36.1111
T2G;C30A	101	8.91089	89	14.6067	100	77	102	16.6667	78	21.7949	67	32.8358	123	72.3577	72	12.5	106	11.3208	113	51.3274
T2G;C30G	79	10.1266	57	12.2807	78	69.2308	62	24.1935	50	14	51	45.098	87	71.2644	63	19.0476	73	16.4384	87	47.1264
T2G;C30T	116	9.48276	117	22.2222	137	83.9416	117	24.7863	56	14.2857	130	52.3077	155	85.8065	101	20.7921	117	12.8205	149	63.7584
T2G;C31A	106	9.43396	60	8.33333	70	67.1429	92	15.2174	57	15.7895	54	33.3333	85	71.7647	84	7.14286	75	17.3333	99	61.6162
T2G;C31G	62	16.129	76	17.1053	91	83.5165	82	24.3902	65	18.4615	67	43.2836	104	78.8462	63	12.6984	90	8.88889	104	74.0385
T2G;C31T	84	9.52381	74	6.75676	115	76.5217	98	39.7959	79	11.3924	86	55.814	115	81.7391	89	8.98876	95	16.8421	117	63.2479
T2G;C32A	78	19.2308	111	22.5225	104	76.9231	129	53.4884	100	19	93	79.5699	134	85.8209	103	25.2427	124	19.3548	161	85.0932
T2G;C32G	56	26.7857	70	28.5714	46	73.913	66	59.0909	54	38.8889	66	74.2424	61	83.6066	61	47.541	70	32.8571	61	81.9672
T2G;C32T	110	9.09091	102	20.5882	108	89.8148	112	47.3214	85	24.7059	95	67.3684	124	85.4839	100	30	132	13.6364	148	82.4324
T2G;T33A	134	21.6418	123	30.0813	175	86.2857	172	52.3256	106	38.6792	131	70.9924	201	90.0498	112	35.7143	130	29.2308	180	81.6667
T2G;T33C	83	22.8916	79	29.1139	72	69.4444	77	41.5584	72	33.3333	84	46.4286	86	73.2558	86	27.907	91	26.3736	99	56.5657
T2G;T33G	140	63.5714	128	56.25	108	62.963	108	52.7778	122	56.5574	124	70.9677	106	57.5472	120	50	146	52.7397	93	63.4409
T2G;C34A	116	16.3793	125	31.2	202	89.604	133	54.1353	109	30.2752	184	74.4565	234	94.0171	152	34.8684	127	27.5591	228	85.5263
T2G;C34G	128	29.6875	126	33.3333	166	88.5542	170	56.4706	94	31.9149	166	68.0723	212	83.0189	137	37.2263	131	32.0611	236	82.6271
T2G;C34T	134	20.8955	138	18.8406	180	90.5556	129	55.0388	99	22.2222	141	68.0851	207	88.4058	141	26.9504	135	17.037	215	83.2558
T2G;T35A	104	13.4615	68	17.6471	134	91.0448	126	42.8571	70	31.4286	102	58.8235	150	88	112	30.3571	108	24.0741	129	86.0465
T2G;T35C	79	25.3165	78	19.2308	100	77	63	30.1587	59	15.2542	75	52	78	76.9231	91	20.8791	88	25	120	61.6667
T2G;T35G	83	31.3253	78	30.7692	80	60	88	40.9091	71	35.2113	73	45.2055	114	78.0702	89	25.8427	94	26.5957	115	52.1739
T2G;T36A	75	12	76	26.3158	103	83.4951	101	37.6238	75	28	99	60.6061	114	87.7193	79	24.0506	111	16.2162	130	85.3846
T2G;T36C	61	14.7541	58	5.17241	54	25.9259	64	15.625	70	11.4286	47	21.2766	50	24	60	11.6667	57	5.26316	63	33.3333
T2G;T36G	65	26.1538	73	24.6575	78	82.0513	74	50	72	26.3889	78	71.7949	60	78.3333	67	28.3582	81	24.6914	92	81.5217
T2G;T37A	111	11.7117	87	16.092	105	89.5238	116	43.1034	73	23.2877	90	68.8889	120	83.3333	107	27.1028	102	20.5882	143	76.2238
T2G;T37C	88	59.0909	84	54.7619	82	78.0488	79	67.0886	69	47.8261	77	58.4416	90	75.5556	87	51.7241	118	50	88	73.8636
T2G;T37G	80	13.75	71	39.4366	85	72.9412	88	35.2273	65	20	71	49.2958	117	76.0684	64	20.3125	97	26.8041	76	59.2105
T2G;C38A	105	16.1905	97	14.433	102	79.4118	82	43.9024	68	30.8824	83	55.4217	95	73.6842	104	21.1538	94	15.9574	116	77.5862
T2G;C38G	85	18.8235	87	16.092	108	78.7037	87	49.4253	93	27.957	98	64.2857	143	79.7203	93	24.7312	99	20.202	143	79.021
T2G;C38T	79	8.86076	77	12.987	72	76.3889	78	39.7436	73	17.8082	70	55.7143	93	78.4946	71	29.5775	90	21.1111	93	75.2688
T2G;A39C	99	21.2121	98	26.5306	82	84.1463	128	42.9688	83	27.7108	108	51.8519	106	79.2453	110	35.4545	105	24.7619	123	81.3008
T2G;A39G	105	26.6667	95	34.7368	124	74.1935	113	42.4779	103	29.1262	112	56.25	108	80.5556	131	28.2443	114	22.807	112	68.75
T2G;A39T	86	18.6047	119	22.6891	94	69.1489	112	39.2857	101	12.8713	87	45.977	126	80.9524	106	21.6981	110	25.4545	123	60.9756
T2G;T40A	103	9.70874	102	16.6667	110	81.8182	120	32.5	86	24.4186	99	48.4848	127	74.0157	93	20.4301	112	19.6429	128	77.3438
T2G;T40C	90	15.5556	70	11.4286	91	75.8242	91	43.956	72	23.6111	85	58.8235	74	74.3243	88	25	107	25.2336	120	76.6667
T2G;T40G	81	19.7531	84	22.619	100	82	89	28.0899	71	25.3521	84	53.5714	87	77.0115	83	15.6627	96	27.0833	106	68.8679
T2G;T41A	113	20.354	89	23.5955	100	75	122	45.9016	63	25.3968	95	53.6842	108	84.2593	77	15.5844	116	24.1379	107	61.6822
T2G;T41C	77	16.8831	72	29.1667	92	71.7391	107	47.6636	83	36.1446	69	57.971	84	71.4286	68	32.3529	106	17.9245	110	74.5455
T2G;T41G	91	20.8791	81	18.5185	109	66.055	87	29.8851	56	23.2143	91	36.2637	107	65.4206	72	20.8333	102	14.7059	83	50.6024
T2G;G42A	107	14.0187	106	14.1509	127	78.7402	87	42.5287	78	21.7949	94	44.6809	156	81.4103	107	22.4299	113	19.469	103	66.0194
T2G;G42C	91	14.2857	108	25	135	78.5185	108	46.2963	86	19.7674	120	51.6667	140	80	102	30.3922	142	19.0141	141	67.3759
T2G;G42T	115	18.2609	108	6.48148	134	76.8657	129	44.186	105	26.6667	139	61.1511	154	81.1688	111	29.7297	141	24.8227	198	79.2929
T2G;C43A	110	23.6364	124	12.0968	120	60.8333	116	12.069	88	17.0455	79	26.5823	135	68.1481	92	16.3043	129	13.9535	132	46.2121
T2G;C43G	88	9.09091	75	8	96	50	109	24.7706	58	10.3448	49	12.2449	97	47.4227	74	14.8649	93	12.9032	64	29.6875
T2G;C43T	105	13.3333	113	23.0088	104	77.8846	127	41.7323	80	20	110	53.6364	122	84.4262	119	23.5294	105	16.1905	142	74.6479
T2G;G44A	124	9.67742	150	12	93	33.3333	130	16.9231	100	11	73	15.0685	107	39.2523	108	9.25926	121	9.91736	128	20.3125
T2G;G44C	139	48.9209	160	46.25	159	77.9874	141	55.3191	115	46.9565	169	58.5799	192	78.6458	121	36.3636	146	49.3151	168	70.8333
T2G;G44T	132	18.1818	141	18.4397	109	61.4679	159	30.8176	102	21.5686	108	31.4815	151	68.2119	122	18.8525	157	18.4713	184	47.8261
T2G;C45A	93	15.0538	93	20.4301	70	20	120	20	86	20.9302	70	27.1429	87	22.9885	90	11.1111	100	18	77	11.6883
T2G;C45G	80	18.75	81	11.1111	60	23.3333	83	12.0482	57	29.8246	56	30.3571	62	35.4839	71	14.0845	71	9.85915	77	18.1818
T2G;C45T	126	19.0476	132	26.5152	121	66.1157	124	35.4839	122	31.9672	105	33.3333	116	74.1379	119	23.5294	122	20.4918	108	47.2222
T2G;G46A	115	33.0435	129	46.5116	110	90	163	80.3681	121	70.2479	119	85.7143	120	84.1667	128	78.125	133	66.1654	142	89.4366
T2G;G46C	195	72.3077	213	68.0751	172	79.6512	205	65.3659	187	65.7754	157	59.2357	216	77.3148	183	61.7486	218	65.5963	202	71.7822
T2G;G46T	137	57.6642	113	67.2566	101	69.3069	112	58.9286	88	60.2273	89	62.9213	109	74.3119	119	37.8151	154	50.6494	108	58.3333
T2G;G47A	132	58.3333	142	68.3099	94	58.5106	136	53.6765	119	62.1849	109	44.0367	106	59.434	103	51.4563	131	54.1985	118	54.2373
T2G;G47C	143	77.6224	184	80.9783	101	75.2475	135	77.7778	141	75.1773	112	70.5357	133	71.4286	119	69.7479	169	69.8225	141	74.4681
T2G;G47T	195	69.2308	191	74.3455	135	72.5926	198	66.1616	146	70.5479	121	71.9008	141	69.5035	179	64.2458	219	63.9269	166	56.0241
T2G;G48A	148	53.3784	139	48.9209	99	36.3636	102	39.2157	133	57.1429	97	49.4845	99	46.4646	83	38.5542	137	47.4453	131	45.0382
T2G;G48C	194	84.5361	160	86.875	105	75.2381	141	85.8156	112	87.5	92	65.2174	113	70.7965	152	69.7368	179	81.5642	117	84.6154
T2G;G48T	201	77.6119	203	81.2808	100	60	165	69.697	146	77.3973	130	75.3846	147	70.7483	171	67.8363	175	77.7143	141	70.2128
T2G;G49A	120	11.6667	138	26.087	109	29.3578	121	31.405	102	19.6078	98	28.5714	92	33.6957	122	16.3934	132	27.2727	118	26.2712
T2G;G49C	123	17.8862	113	16.8142	61	18.0328	119	18.4874	81	17.284	84	21.4286	87	28.7356	106	14.1509	125	20.8	109	15.5963
T2G;G49T	158	13.9241	138	21.7391	96	12.5	127	11.0236	129	19.3798	122	13.9344	111	24.3243	150	8.66667	140	17.1429	161	13.0435
T2G;A50C	94	37.234	101	45.5446	81	37.037	121	24.7934	98	43.8776	81	32.0988	90	53.3333	116	26.7241	126	34.127	112	41.9643
T2G;A50G	79	16.4557	84	14.2857	59	32.2034	87	21.8391	71	32.3944	75	30.6667	76	53.9474	71	18.3099	112	33.0357	74	32.4324
T2G;A50T	98	16.3265	100	20	84	23.8095	67	17.9104	67	8.95522	85	16.4706	95	15.7895	93	7.52688	126	14.2857	113	17.6991
T2G;C51A	82	23.1707	88	32.9545	65	33.8462	105	35.2381	73	31.5068	70	31.4286	92	28.2609	96	18.75	123	34.9593	87	40.2299
T2G;C51G	102	25.4902	95	35.7895	73	28.7671	77	28.5714	65	46.1538	75	26.6667	89	46.0674	90	24.4444	116	30.1724	72	34.7222
T2G;C51T	137	40.8759	131	58.0153	101	42.5743	121	45.4545	85	41.1765	88	52.2727	97	59.7938	112	50.8929	127	44.8819	107	46.729
T2G;G52A	95	24.2105	94	30.8511	74	41.8919	114	35.9649	77	36.3636	82	36.5854	99	57.5758	85	24.7059	108	26.8519	102	49.0196
T2G;G52C	79	21.519	91	23.0769	74	32.4324	94	36.1702	82	23.1707	87	35.6322	94	55.3191	99	17.1717	105	23.8095	105	30.4762
T2G;G52T	92	31.5217	88	39.7727	75	28	116	25.8621	94	27.6596	85	32.9412	89	53.9326	76	23.6842	93	22.5806	89	29.2135
T2G;A53C	96	12.5	95	8.42105	84	19.0476	128	13.2812	103	8.73786	93	8.60215	91	25.2747	127	9.44882	145	9.65517	94	23.4043
T2G;A53G	84	11.9048	92	11.9565	61	73.7705	78	15.3846	72	20.8333	75	28	89	61.7978	72	20.8333	98	11.2245	100	52
T2G;A53T	107	6.54206	91	10.989	95	11.5789	87	4.5977	81	8.64198	81	14.8148	78	8.97436	94	9.57447	120	10.8333	71	11.2676
T2G;C54A	106	17.9245	110	22.7273	91	31.8681	96	30.2083	98	17.3469	90	23.3333	91	25.2747	90	15.5556	119	28.5714	109	25.6881
T2G;C54G	107	6.54206	83	13.253	55	9.09091	105	10.4762	65	6.15385	74	8.10811	72	6.94444	80	7.5	99	3.0303	83	7.22892
T2G;C54T	116	7.75862	101	8.91089	88	7.95455	115	12.1739	79	7.59494	87	14.9425	94	14.8936	116	5.17241	108	9.25926	109	8.25688
T2G;C55A	134	54.4776	133	63.1579	77	57.1429	159	50.3145	112	52.6786	110	60.9091	130	74.6154	122	33.6066	153	52.9412	144	60.4167
T2G;C55G	97	58.7629	74	78.3784	52	65.3846	72	80.5556	71	57.7465	61	67.2131	82	64.6341	78	64.1026	90	63.3333	77	64.9351
T2G;C55T	115	17.3913	104	22.1154	84	59.5238	102	35.2941	79	29.1139	90	37.7778	118	66.9492	117	29.9145	126	22.2222	98	48.9796
T2G;C56A	111	18.9189	118	17.7966	98	32.6531	119	22.6891	78	17.9487	91	29.6703	103	45.6311	102	17.6471	130	19.2308	90	24.4444
T2G;C56G	74	6.75676	70	11.4286	52	21.1538	63	15.873	69	13.0435	61	9.83607	48	41.6667	72	12.5	91	12.0879	57	15.7895
T2G;C56T	96	12.5	89	10.1124	75	26.6667	106	16.0377	95	21.0526	101	15.8416	118	57.6271	107	15.8879	117	17.9487	123	30.0813
T2G;T57A	83	8.43373	86	10.4651	92	40.2174	81	19.7531	71	9.85915	76	21.0526	86	54.6512	78	10.2564	109	10.0917	79	24.0506
T2G;T57C	100	13	106	15.0943	117	88.0342	96	57.2917	69	28.9855	114	72.807	126	88.0952	96	23.9583	135	11.8519	116	82.7586
T2G;T57G	86	6.97674	71	11.2676	76	35.5263	82	21.9512	73	10.9589	81	14.8148	82	56.0976	84	16.6667	124	9.67742	80	35
T2G;G58A	92	32.6087	96	30.2083	98	76.5306	96	50	58	27.5862	99	65.6566	143	76.2238	83	38.5542	97	27.8351	128	74.2188
T2G;G58C	86	26.7442	88	34.0909	103	73.7864	90	43.3333	64	43.75	65	55.3846	108	86.1111	72	50	94	39.3617	114	63.1579
T2G;G58T	116	15.5172	101	26.7327	117	70.9402	136	38.2353	91	29.6703	75	41.3333	153	79.7386	116	30.1724	132	25.7576	137	51.8248
T2G;C59A	103	39.8058	102	41.1765	135	85.9259	121	55.3719	84	45.2381	101	55.4455	139	87.0504	96	47.9167	111	43.2432	174	81.6092
T2G;C59G	72	36.1111	71	23.9437	100	77	113	64.6018	66	40.9091	101	76.2376	136	77.9412	80	32.5	85	25.8824	141	80.1418
T2G;C59T	113	31.8584	120	34.1667	129	79.845	126	56.3492	102	49.0196	102	61.7647	136	83.8235	116	45.6897	134	37.3134	151	73.5099
T2G;A60C	155	38.7097	131	41.9847	115	66.087	140	40	92	34.7826	116	56.8966	127	63.7795	127	29.9213	144	37.5	141	55.3191
T2G;A60G	90	18.8889	90	12.2222	85	72.9412	92	33.6957	96	20.8333	73	53.4247	87	78.1609	63	14.2857	93	4.30108	86	73.2558
T2G;A60T	117	9.40171	90	6.66667	115	50.4348	104	11.5385	85	18.8235	106	21.6981	138	52.8986	111	10.8108	133	19.5489	106	33.0189
T2G;G61A	124	15.3226	110	19.0909	108	85.1852	135	60	100	33	120	62.5	143	76.2238	135	31.1111	128	18.75	164	68.9024
T2G;G61C	119	17.6471	124	16.9355	119	75.6303	160	45	101	24.7525	128	57.0312	140	82.1429	102	32.3529	139	17.9856	151	70.1987
T2G;G61T	112	15.1786	129	18.6047	153	87.5817	156	53.2051	114	25.4386	146	50	162	82.716	126	40.4762	151	22.5166	152	79.6053
T2G;A62C	91	27.4725	93	29.0323	137	95.6204	148	76.3514	95	46.3158	123	87.8049	156	93.5897	110	57.2727	93	38.7097	131	86.2595
T2G;A62G	99	46.4646	108	35.1852	92	81.5217	97	44.3299	85	37.6471	89	57.3034	98	76.5306	103	43.6893	119	45.3782	94	71.2766
T2G;A62T	99	13.1313	117	28.2051	92	70.6522	117	24.7863	93	30.1075	86	48.8372	140	70	101	22.7723	124	25	120	51.6667
T2G;G63A	140	10	157	8.9172	164	71.9512	131	18.3206	114	7.01754	114	34.2105	196	79.5918	137	15.3285	153	12.4183	166	57.8313
T2G;G63C	126	6.34921	91	8.79121	180	82.2222	135	14.8148	93	6.45161	109	49.5413	204	84.3137	99	9.09091	116	12.931	173	63.0058
T2G;G63T	148	7.43243	164	9.7561	244	83.1967	148	30.4054	122	7.37705	176	56.25	229	84.7162	140	7.85714	211	6.16114	235	71.0638
T2G;A64C	96	11.4583	96	10.4167	132	78.7879	109	27.5229	84	8.33333	82	46.3415	142	83.8028	85	8.23529	104	20.1923	137	65.6934
T2G;A64G	80	25	76	34.2105	113	88.4956	125	71.2	90	38.8889	126	81.746	130	89.2308	96	46.875	103	42.7184	164	85.9756
T2G;A64T	100	9	97	10.3093	121	83.4711	127	40.1575	88	11.3636	96	58.3333	154	88.961	85	27.0588	113	6.19469	156	80.1282
T2G;G65A	128	9.375	148	16.8919	250	94.4	244	82.377	145	38.6207	212	90.0943	262	94.2748	184	59.7826	156	11.5385	250	93.2
T2G;G65C	67	8.95522	80	11.25	83	87.9518	112	74.1071	66	18.1818	109	84.4037	129	93.0233	106	26.4151	91	9.89011	155	90.3226
T2G;G65T	120	10	137	21.8978	199	90.4523	244	88.9344	110	35.4545	244	89.3443	199	95.4774	156	56.4103	154	12.3377	259	92.278
T2G;G66A	167	18.5629	137	31.3869	222	94.5946	208	91.8269	189	63.4921	224	91.0714	231	92.6407	204	78.9216	167	31.7365	215	95.814
T2G;G66C	67	10.4478	79	16.4557	105	90.4762	149	83.8926	106	49.0566	111	83.7838	155	92.2581	123	73.1707	95	21.0526	161	90.0621
T2G;G66T	138	47.1014	179	56.4246	173	92.4855	225	90.6667	165	80	170	91.1765	174	94.2529	177	89.8305	192	70.8333	188	92.5532
T2G;C67A	212	68.8679	235	72.3404	197	91.3706	191	91.0995	189	82.5397	190	85.7895	222	95.4955	201	80.0995	225	69.7778	206	88.835
T2G;C67G	99	31.3131	86	39.5349	89	82.0225	110	77.2727	95	54.7368	86	82.5581	96	87.5	109	50.4587	109	49.5413	106	89.6226
T2G;C67T	179	69.8324	206	74.2718	157	91.7197	172	86.0465	137	85.4015	163	88.9571	169	94.6746	162	77.7778	196	74.4898	191	92.6702
T2G;T68A	199	63.3166	207	76.8116	206	93.2039	232	88.3621	202	89.1089	193	91.7098	236	95.7627	230	88.6957	278	75.1799	207	94.686
T2G;T68C	114	45.614	123	63.4146	114	92.1053	152	89.4737	94	71.2766	103	82.5243	118	94.9153	156	74.359	178	56.7416	153	87.5817
T2G;T68G	104	11.5385	75	21.3333	67	77.6119	92	57.6087	70	31.4286	73	72.6027	69	86.9565	75	38.6667	88	27.2727	77	84.4156
T2G;G69A	253	81.4229	275	89.8182	243	93.4156	249	92.3695	235	91.0638	207	88.8889	264	93.9394	281	91.1032	300	88.3333	283	96.1131
T2G;G69C	170	80	192	77.0833	176	97.1591	214	89.2523	163	89.5706	166	94.5783	180	98.8889	201	91.5423	208	83.6538	203	90.1478
T2G;G69T	202	85.1485	246	86.9919	202	93.0693	270	92.5926	212	92.4528	203	90.1478	227	96.9163	241	86.722	270	88.8889	234	93.1624
T2G;A70C	85	21.1765	83	32.5301	133	85.7143	131	77.0992	92	47.8261	142	85.2113	150	90.6667	91	65.9341	91	29.6703	179	90.5028
T2G;A70G	103	21.3592	88	32.9545	110	91.8182	156	76.2821	82	35.3659	100	84	134	91.791	126	46.8254	120	34.1667	146	89.0411
T2G;A70T	104	39.4231	115	43.4783	153	92.8105	145	77.931	81	61.7284	147	83.6735	149	92.6174	125	59.2	130	45.3846	172	90.6977
T2G;A71C	90	12.2222	98	10.2041	73	43.8356	79	13.9241	69	4.34783	95	12.6316	102	31.3725	92	10.8696	120	8.33333	104	18.2692
T2G;A71G	86	11.6279	101	23.7624	149	91.2752	152	69.0789	98	26.5306	147	76.1905	139	89.9281	108	44.4444	138	18.1159	188	95.2128
T2G;A71T	98	4.08163	112	9.82143	149	75.1678	109	17.4312	94	13.8298	111	37.8378	187	67.3797	127	9.44882	132	8.33333	159	52.2013
T2G;A72C	96	25	92	18.4783	120	76.6667	111	34.2342	90	8.88889	120	53.3333	151	84.106	82	18.2927	132	12.1212	151	70.1987
T2G;A72G	89	20.2247	103	18.4466	146	91.0959	176	63.6364	87	34.4828	120	85	128	96.0938	132	44.697	120	21.6667	183	87.9781
T2G;A72T	104	18.2692	92	20.6522	155	88.3871	126	45.2381	64	26.5625	146	72.6027	159	83.0189	99	26.2626	132	20.4545	158	70.8861
T3A;C4A	86	11.6279	56	21.4286	27	48.1481	36	44.4444	44	34.0909	29	48.2759	28	64.2857	45	24.4444	80	23.75	39	53.8462
T3A;C4G	39	20.5128	44	40.9091	36	47.2222	59	47.4576	53	26.4151	46	39.1304	51	39.2157	59	23.7288	58	25.8621	37	59.4595
T3A;C4T	82	3.65854	80	17.5	28	50	31	38.7097	37	29.7297	33	39.3939	37	43.2432	41	21.9512	89	23.5955	45	55.5556
T3A;A5C	42	9.52381	40	25	39	61.5385	45	53.3333	25	24	25	44	24	87.5	51	35.2941	60	21.6667	40	50
T3A;A5G	40	15	61	16.3934	26	73.0769	42	57.1429	39	38.4615	31	64.5161	19	68.4211	37	43.2432	50	30	29	55.1724
T3A;A5T	39	2.5641	33	9.09091	13	30.7692	17	35.2941	15	13.3333	14	50	10	10	29	13.7931	36	5.55556	6	33.3333
T3A;G6A	121	64.4628	152	82.2368	116	81.0345	150	88.6667	143	88.8112	110	83.6364	117	90.5983	147	77.551	157	78.9809	119	87.395
T3A;G6C	116	64.6552	169	78.1065	126	89.6825	134	85.8209	136	83.0882	157	87.2611	126	85.7143	177	80.791	171	82.4561	160	87.5
T3A;G6T	138	58.6957	171	71.345	137	89.781	180	85.5556	160	90.625	165	91.5152	172	92.4419	170	81.1765	203	71.4286	197	89.3401
T3A;C7A	111	64.8649	130	81.5385	86	81.3953	119	77.3109	87	81.6092	95	80	111	89.1892	107	71.9626	142	76.7606	91	82.4176
T3A;C7G	129	73.6434	153	82.3529	119	90.7563	154	89.6104	124	88.7097	117	84.6154	126	88.8889	145	85.5172	175	86.8571	140	95
T3A;C7T	93	53.7634	98	72.449	73	90.411	106	80.1887	99	79.798	83	74.6988	81	80.2469	99	76.7677	128	75.7812	87	90.8046
T3A;C8A	95	26.3158	116	47.4138	163	91.411	148	85.8108	120	75.8333	147	82.9932	145	95.1724	121	76.0331	122	50	165	89.0909
T3A;C8G	67	77.6119	81	93.8272	66	90.9091	70	81.4286	73	94.5205	78	85.8974	67	82.0896	88	77.2727	102	77.451	73	90.411
T3A;C8T	78	46.1538	112	54.4643	92	90.2174	126	87.3016	97	75.2577	114	78.9474	119	92.437	102	68.6275	132	58.3333	92	85.8696
T3A;G9A	124	5.64516	126	4.7619	50	46	112	6.25	104	3.84615	63	23.8095	70	50	126	5.55556	141	4.96454	60	33.3333
T3A;G9C	114	1.75439	105	0.952381	71	7.04225	105	6.66667	97	2.06186	79	6.32911	54	18.5185	96	5.20833	146	6.84932	95	6.31579
T3A;G9T	58	5.17241	60	1.66667	39	7.69231	68	4.41176	67	2.98507	49	10.2041	28	10.7143	68	2.94118	64	4.6875	54	12.963
T3A;G10A	111	7.20721	122	9.01639	57	70.1754	124	35.4839	99	19.1919	83	43.3735	66	80.303	109	21.1009	147	10.2041	81	71.6049
T3A;G10C	58	8.62069	73	6.84932	45	44.4444	58	10.3448	44	6.81818	70	11.4286	43	32.5581	70	7.14286	77	7.79221	58	18.9655
T3A;G10T	74	5.40541	69	4.34783	44	34.0909	83	10.8434	64	9.375	60	13.3333	53	37.7358	71	2.8169	98	6.12245	62	27.4194
T3A;A11C	32	18.75	36	8.33333	30	50	46	15.2174	29	6.89655	22	22.7273	33	54.5455	34	17.6471	52	19.2308	31	38.7097
T3A;A11G	49	10.2041	39	30.7692	30	70	57	61.4035	61	44.2623	35	60	40	82.5	40	60	67	23.8806	60	71.6667
T3A;A11T	50	2	56	7.14286	31	19.3548	45	6.66667	53	0	39	7.69231	24	29.1667	55	1.81818	63	3.1746	41	19.5122
T3A;A12C	52	3.84615	64	6.25	28	25	55	7.27273	46	10.8696	58	13.7931	42	19.0476	58	8.62069	75	12	43	20.9302
T3A;A12G	49	10.2041	51	7.84314	26	57.6923	34	17.6471	48	10.4167	39	35.8974	38	52.6316	52	26.9231	67	4.47761	38	63.1579
T3A;A12T	84	7.14286	89	2.24719	39	15.3846	100	3	85	2.35294	58	6.89655	38	7.89474	76	3.94737	98	4.08163	64	6.25
T3A;G13A	55	12.7273	42	40.4762	28	53.5714	36	50	22	40.9091	37	45.9459	29	51.7241	49	55.102	53	58.4906	40	57.5
T3A;G13C	73	6.84932	57	0	22	45.4545	35	31.4286	39	12.8205	29	31.0345	33	24.2424	65	21.5385	75	18.6667	38	57.8947
T3A;G13T	99	5.05051	72	13.8889	22	40.9091	42	33.3333	27	18.5185	37	48.6486	41	53.6585	43	18.6047	70	17.1429	34	52.9412
T3A;C14A	34	17.6471	56	30.3571	47	19.1489	38	23.6842	43	16.2791	44	15.9091	47	8.51064	66	7.57576	76	26.3158	68	14.7059
T3A;C14G	36	13.8889	49	30.6122	42	14.2857	35	14.2857	43	9.30233	42	16.6667	43	20.9302	40	5	54	11.1111	43	9.30233
T3A;C14T	44	0	65	10.7692	31	6.45161	45	13.3333	41	4.87805	45	22.2222	42	16.6667	60	8.33333	76	7.89474	68	14.7059
T3A;G15A	74	2.7027	101	4.9505	74	8.10811	117	5.98291	88	2.27273	87	8.04598	87	5.74713	99	0	114	8.77193	87	2.29885
T3A;G15C	83	1.20482	89	11.236	65	18.4615	92	8.69565	84	8.33333	77	14.2857	72	31.9444	96	11.4583	118	16.9492	83	21.6867
T3A;G15T	96	10.4167	59	10.1695	74	6.75676	60	8.33333	67	4.47761	62	9.67742	89	10.1124	79	12.6582	111	6.30631	87	13.7931
T3A;G16A	78	0	63	4.7619	51	3.92157	68	2.94118	64	7.8125	53	1.88679	63	4.7619	50	4	57	0	50	2
T3A;G16C	63	7.93651	71	11.2676	51	5.88235	68	1.47059	46	26.087	57	17.5439	59	11.8644	82	13.4146	58	15.5172	74	17.5676
T3A;G16T	66	3.0303	67	8.95522	49	8.16327	50	2	56	1.78571	70	4.28571	53	16.9811	75	2.66667	72	9.72222	67	5.97015
T3A;G17A	83	10.8434	77	9.09091	60	13.3333	83	14.4578	68	5.88235	62	9.67742	69	13.0435	87	1.14943	94	12.766	79	16.4557
T3A;G17C	94	18.0851	121	31.405	65	33.8462	95	29.4737	97	34.0206	73	26.0274	87	48.2759	107	24.2991	132	32.5758	86	36.0465
T3A;G17T	54	0	42	9.52381	35	11.4286	65	7.69231	32	9.375	62	16.129	55	14.5455	44	2.27273	68	4.41176	40	5
T3A;A18C	95	6.31579	88	4.54545	72	26.3889	74	6.75676	65	10.7692	67	14.9254	68	30.8824	88	5.68182	109	7.33945	85	18.8235
T3A;A18G	109	12.844	131	24.4275	88	32.9545	98	16.3265	102	11.7647	91	17.5824	118	24.5763	120	20	138	18.8406	98	22.449
T3A;A18T	71	14.0845	52	15.3846	48	10.4167	72	19.4444	46	2.17391	55	18.1818	62	6.45161	59	6.77966	83	13.253	59	11.8644
T3A;C19A	78	26.9231	87	24.1379	74	31.0811	72	41.6667	73	26.0274	73	28.7671	107	36.4486	77	19.4805	77	19.4805	94	32.9787
T3A;C19G	41	0	54	18.5185	46	8.69565	45	6.66667	51	7.84314	41	14.6341	50	4	55	10.9091	44	13.6364	59	6.77966
T3A;C19T	59	3.38983	68	8.82353	59	3.38983	78	0	50	4	59	1.69492	82	4.87805	66	3.0303	76	2.63158	77	2.5974
T3A;G20A	68	20.5882	80	50	48	33.3333	79	54.4304	47	36.1702	55	45.4545	56	46.4286	83	34.9398	102	43.1373	70	40
T3A;G20C	99	9.09091	84	13.0952	76	11.8421	104	9.61538	90	14.4444	74	14.8649	89	23.5955	89	8.98876	83	8.43373	98	9.18367
T3A;G20T	98	30.6122	115	56.5217	78	42.3077	122	50.8197	94	44.6809	76	42.1053	97	47.4227	107	36.4486	121	40.4959	99	46.4646
T3A;A21C	86	5.81395	85	9.41176	57	22.807	80	10	69	10.1449	45	6.66667	52	11.5385	78	7.69231	98	17.3469	67	17.9104
T3A;A21G	67	8.95522	69	26.087	40	85	65	73.8462	40	32.5	54	81.4815	54	81.4815	61	57.377	84	41.6667	45	77.7778
T3A;A21T	75	14.6667	68	13.2353	63	36.5079	78	21.7949	57	12.2807	67	22.3881	63	50.7937	79	12.6582	85	12.9412	72	30.5556
T3A;C22A	96	9.375	77	14.2857	54	25.9259	78	7.69231	76	18.4211	56	21.4286	54	37.037	78	14.1026	79	13.9241	70	27.1429
T3A;C22G	44	4.54545	67	4.47761	40	5	42	0	37	13.5135	37	5.40541	61	1.63934	49	4.08163	75	8	49	4.08163
T3A;C22T	51	1.96078	62	3.22581	48	10.4167	51	0	49	6.12245	38	2.63158	49	10.2041	62	3.22581	46	4.34783	63	12.6984
T3A;C23A	58	1.72414	63	6.34921	48	6.25	80	2.5	58	5.17241	60	13.3333	57	8.77193	56	7.14286	78	1.28205	44	2.27273
T3A;C23G	17	5.88235	26	30.7692	25	24	22	18.1818	20	15	14	7.14286	23	4.34783	24	16.6667	31	41.9355	26	23.0769
T3A;C23T	63	4.7619	58	6.89655	60	23.3333	60	13.3333	64	4.6875	52	9.61538	69	17.3913	71	9.85915	84	3.57143	75	17.3333
T3A;C24A	55	7.27273	61	11.4754	44	13.6364	82	10.9756	52	13.4615	54	14.8148	36	38.8889	55	12.7273	66	19.697	61	8.19672
T3A;C24G	53	39.6226	44	47.7273	56	41.0714	58	41.3793	48	47.9167	43	55.814	63	38.0952	66	37.8788	70	38.5714	40	55
T3A;C24T	52	36.5385	63	36.5079	56	64.2857	51	58.8235	56	35.7143	62	51.6129	58	63.7931	77	41.5584	93	46.2366	57	56.1404
T3A;G25A	86	1.16279	86	6.97674	72	4.16667	79	3.79747	67	1.49254	79	7.59494	67	1.49254	74	1.35135	91	3.2967	79	5.06329
T3A;G25C	87	5.74713	73	8.21918	90	31.1111	105	8.57143	79	7.59494	86	3.48837	91	28.5714	98	11.2245	124	4.03226	92	22.8261
T3A;G25T	88	3.40909	68	7.35294	55	14.5455	73	5.47945	81	4.93827	78	10.2564	60	35	82	2.43902	101	8.91089	78	16.6667
T3A;T26A	134	33.5821	166	39.759	198	93.4343	181	77.3481	148	53.3784	195	85.641	203	91.6256	189	55.5556	164	43.9024	227	90.3084
T3A;T26C	113	31.8584	113	51.3274	156	96.1538	190	87.8947	111	48.6486	159	91.195	177	91.5254	120	65	107	42.9907	172	93.6047
T3A;T26G	131	45.8015	129	54.2636	198	91.4141	223	77.13	142	65.493	158	89.2405	222	93.6937	158	62.6582	180	61.1111	192	94.2708
T3A;T27A	146	35.6164	140	35	212	92.4528	237	68.7764	125	41.6	172	84.3023	282	95.0355	169	56.8047	176	33.5227	276	89.1304
T3A;T27C	123	60.1626	161	59.6273	182	93.4066	230	93.4783	131	68.7023	166	89.759	195	95.3846	179	82.1229	169	60.355	208	91.3462
T3A;T27G	122	18.8525	114	28.9474	174	84.4828	149	30.2013	77	23.3766	116	45.6897	166	81.3253	119	21.0084	137	20.438	177	72.8814
T3A;T28A	155	31.6129	155	32.2581	246	93.9024	228	61.4035	128	42.1875	192	78.6458	268	95.1493	191	45.5497	150	34.6667	246	89.0244
T3A;T28C	115	22.6087	114	35.9649	160	93.125	187	71.6578	99	35.3535	151	78.8079	188	90.4255	99	35.3535	147	25.8503	169	88.7574
T3A;T28G	131	54.1985	167	53.8922	146	84.9315	154	62.3377	136	56.6176	156	71.1538	160	88.125	134	60.4478	181	56.9061	183	79.7814
T3A;T29A	115	18.2609	128	25.7812	158	86.7089	176	52.8409	108	25	144	75	204	87.7451	129	32.5581	160	32.5	183	81.9672
T3A;T29C	142	73.9437	152	83.5526	140	92.8571	185	89.7297	140	81.4286	162	83.9506	185	94.0541	198	88.3838	167	79.0419	189	94.709
T3A;T29G	99	14.1414	106	16.0377	136	81.6176	132	34.8485	106	16.0377	99	51.5152	162	74.6914	92	18.4783	114	12.2807	167	62.2754
T3A;C30A	116	4.31034	95	12.6316	46	73.913	87	24.1379	93	8.60215	79	43.038	62	64.5161	101	8.91089	134	10.4478	59	57.6271
T3A;C30G	92	4.34783	102	4.90196	45	51.1111	94	17.0213	78	2.5641	61	16.3934	63	42.8571	95	5.26316	118	5.9322	72	34.7222
T3A;C30T	109	15.5963	113	11.5044	86	82.5581	145	47.5862	93	19.3548	111	66.6667	102	85.2941	122	31.9672	140	27.8571	124	80.6452
T3A;C31A	71	4.22535	79	7.59494	20	35	71	14.0845	69	7.24638	41	12.1951	22	54.5455	76	3.94737	89	3.37079	36	27.7778
T3A;C31G	82	4.87805	84	16.6667	46	76.087	71	35.2113	62	9.67742	57	61.4035	62	77.4194	69	31.8841	91	14.2857	58	70.6897
T3A;C31T	95	8.42105	109	12.844	45	57.7778	97	40.2062	88	5.68182	51	45.098	35	77.1429	79	7.59494	129	12.4031	67	59.7015
T3A;C32A	112	11.6071	125	28	124	86.2903	141	85.1064	109	40.367	142	87.3239	144	94.4444	132	56.0606	134	23.1343	132	85.6061
T3A;C32G	40	10	46	21.7391	19	47.3684	52	73.0769	33	39.3939	22	68.1818	24	87.5	32	34.375	69	27.5362	20	45
T3A;C32T	100	16	104	22.1154	69	88.4058	117	58.9744	95	34.7368	90	75.5556	70	85.7143	111	42.3423	128	22.6562	95	80
T3A;T33A	152	45.3947	197	46.7005	265	93.9623	247	90.6883	145	59.3103	266	93.2331	273	94.5055	231	67.0996	183	50.8197	278	92.8058
T3A;T33C	92	31.5217	111	37.8378	93	88.172	133	75.188	93	53.7634	130	81.5385	103	88.3495	120	62.5	146	56.8493	121	92.562
T3A;T33G	204	69.1176	228	66.6667	190	85.2632	200	83	145	82.069	185	74.0541	192	87.5	147	70.7483	215	75.814	236	87.2881
T3A;C34A	167	34.7305	181	51.3812	277	97.1119	290	90.3448	115	54.7826	256	91.7969	300	94	214	67.757	173	45.6647	292	93.4932
T3A;C34G	63	25.3968	61	32.7869	41	75.6098	69	62.3188	48	45.8333	45	55.5556	39	61.5385	68	50	64	23.4375	61	60.6557
T3A;C34T	138	20.2899	161	28.5714	158	88.6076	238	71.8487	147	31.9728	201	87.0647	188	92.5532	168	52.9762	216	37.037	249	89.9598
T3A;T35A	109	26.6055	88	35.2273	95	86.3158	114	77.193	102	38.2353	109	84.4037	106	89.6226	110	50	123	40.6504	132	88.6364
T3A;T35C	70	37.1429	94	46.8085	98	89.7959	129	87.5969	95	63.1579	123	86.1789	128	92.9688	109	75.2294	126	48.4127	136	90.4412
T3A;T35G	114	32.4561	139	42.446	186	91.9355	187	83.4225	109	59.633	122	90.9836	168	91.6667	147	63.9456	146	50	174	89.0805
T3A;T36A	69	8.69565	83	18.0723	38	71.0526	59	61.0169	74	25.6757	49	67.3469	57	68.4211	86	39.5349	105	20.9524	56	80.3571
T3A;T36C	48	2.08333	44	0	26	30.7692	26	7.69231	39	7.69231	37	21.6216	38	39.4737	54	12.963	49	8.16327	39	28.2051
T3A;T36G	51	27.451	68	44.1176	54	77.7778	66	78.7879	65	60	55	72.7273	51	72.549	54	72.2222	69	52.1739	57	78.9474
T3A;T37A	66	9.09091	74	10.8108	42	76.1905	61	50.8197	49	22.449	49	40.8163	43	74.4186	63	30.1587	78	14.1026	42	64.2857
T3A;T37C	73	41.0959	89	42.6966	79	81.0127	105	80	73	57.5342	76	81.5789	71	88.7324	82	62.1951	111	52.2523	101	88.1188
T3A;T37G	71	7.04225	60	16.6667	43	72.093	44	75	37	45.9459	55	67.2727	39	74.359	48	50	80	31.25	58	72.4138
T3A;C38A	71	7.04225	74	13.5135	38	55.2632	71	39.4366	60	20	34	41.1765	27	77.7778	55	21.8182	115	9.56522	40	55
T3A;C38G	78	8.97436	89	12.3596	50	66	52	55.7692	72	25	48	52.0833	40	85	66	31.8182	104	14.4231	55	74.5455
T3A;C38T	87	3.44828	68	11.7647	35	57.1429	38	50	48	16.6667	40	42.5	29	58.6207	55	12.7273	107	18.6916	40	60
T3A;A39C	85	5.88235	86	20.9302	51	64.7059	53	66.0377	63	38.0952	59	67.7966	50	78	73	34.2466	96	22.9167	53	67.9245
T3A;A39G	120	18.3333	94	32.9787	95	86.3158	128	75.7812	110	37.2727	101	80.198	139	87.7698	123	48.7805	140	36.4286	125	90.4
T3A;A39T	118	15.2542	111	19.8198	90	77.7778	108	72.2222	85	38.8235	74	78.3784	86	79.0698	101	44.5545	138	28.2609	80	78.75
T3A;T40A	76	13.1579	73	19.1781	41	73.1707	46	56.5217	60	10	43	48.8372	49	55.102	71	28.169	95	12.6316	53	75.4717
T3A;T40C	68	10.2941	59	3.38983	28	53.5714	42	52.381	52	13.4615	50	70	26	76.9231	52	21.1538	78	12.8205	41	73.1707
T3A;T40G	87	10.3448	66	7.57576	41	68.2927	69	55.0725	68	14.7059	61	55.7377	48	75	77	23.3766	100	15	45	68.8889
T3A;T41A	61	6.55738	83	14.4578	35	71.4286	53	52.8302	52	17.3077	48	58.3333	37	78.3784	65	38.4615	89	14.6067	61	72.1311
T3A;T41C	60	20	67	22.3881	33	60.6061	55	41.8182	57	35.0877	35	60	30	76.6667	68	33.8235	84	20.2381	36	66.6667
T3A;T41G	68	4.41176	94	10.6383	52	59.6154	72	22.2222	71	15.493	45	37.7778	50	64	93	7.52688	96	14.5833	65	44.6154
T3A;G42A	74	2.7027	80	13.75	44	63.6364	57	54.386	70	15.7143	43	53.4884	56	73.2143	79	27.8481	98	8.16327	56	75
T3A;G42C	90	13.3333	104	10.5769	38	71.0526	63	52.381	78	28.2051	63	65.0794	41	75.6098	68	42.6471	117	21.3675	52	67.3077
T3A;G42T	118	14.4068	123	8.13008	38	78.9474	97	60.8247	80	17.5	52	50	46	65.2174	95	35.7895	122	19.6721	56	67.8571
T3A;C43A	130	3.84615	128	11.7188	85	83.5294	117	25.641	105	11.4286	80	41.25	92	75	113	16.8142	130	13.8462	90	68.8889
T3A;C43G	110	9.09091	100	6	64	56.25	101	10.8911	78	5.12821	60	18.3333	96	55.2083	114	4.38596	109	8.25688	76	31.5789
T3A;C43T	88	14.7727	98	16.3265	37	62.1622	56	67.8571	68	23.5294	48	75	47	68.0851	60	40	97	14.433	37	78.3784
T3A;G44A	96	4.16667	99	5.05051	56	28.5714	88	12.5	87	3.44828	63	12.6984	39	33.3333	91	6.59341	110	2.72727	72	20.8333
T3A;G44C	96	8.33333	72	13.8889	54	75.9259	67	47.7612	71	29.5775	52	61.5385	60	81.6667	83	37.3494	103	13.5922	75	68
T3A;G44T	83	6.0241	79	7.59494	39	69.2308	83	33.7349	72	13.8889	66	34.8485	42	61.9048	84	19.0476	91	5.49451	50	68
T3A;C45A	107	9.34579	135	1.48148	69	23.1884	126	6.34921	78	8.97436	82	8.53659	76	25	98	10.2041	127	3.93701	84	14.2857
T3A;C45G	48	8.33333	88	5.68182	36	22.2222	70	10	69	1.44928	49	16.3265	41	39.0244	73	2.73973	91	2.1978	56	17.8571
T3A;C45T	63	4.7619	73	6.84932	41	46.3415	48	22.9167	58	22.4138	52	26.9231	26	42.3077	49	10.2041	78	7.69231	51	56.8627
T3A;G46A	60	26.6667	61	37.7049	32	65.625	47	59.5745	48	64.5833	46	56.5217	52	76.9231	70	51.4286	69	46.3768	58	63.7931
T3A;G46C	105	11.4286	136	16.9118	106	79.2453	116	37.069	123	20.3252	107	50.4673	86	84.8837	113	24.7788	113	17.6991	109	72.4771
T3A;G46T	125	39.2	98	52.0408	96	72.9167	127	58.2677	94	42.5532	96	53.125	91	84.6154	97	45.3608	118	54.2373	77	61.039
T3A;G47A	164	47.561	160	65.625	124	77.4194	138	69.5652	136	53.6765	117	74.359	128	78.125	173	56.6474	155	56.7742	146	68.4932
T3A;G47C	142	47.8873	120	55	90	76.6667	143	55.9441	104	56.7308	118	60.1695	105	76.1905	130	59.2308	172	54.6512	114	72.807
T3A;G47T	125	36.8	132	50	123	64.2276	138	59.4203	143	61.5385	113	61.9469	127	74.8031	165	53.9394	170	51.1765	137	72.9927
T3A;G48A	120	10.8333	124	12.9032	63	31.746	140	32.1429	83	13.253	89	30.3371	88	39.7727	103	17.4757	144	13.8889	112	36.6071
T3A;G48C	56	26.7857	80	43.75	50	56	76	47.3684	51	25.4902	60	41.6667	63	44.4444	61	34.4262	71	40.8451	67	50.7463
T3A;G48T	146	20.5479	128	17.9688	120	50.8333	143	34.2657	116	24.1379	110	34.5455	123	56.0976	123	23.5772	131	29.771	122	35.2459
T3A;G49A	111	2.7027	108	9.25926	66	31.8182	134	11.194	80	7.5	87	19.5402	98	46.9388	93	7.52688	126	13.4921	90	24.4444
T3A;G49C	112	4.46429	96	4.16667	59	8.47458	104	0	85	3.52941	90	10	60	20	111	8.10811	108	7.40741	79	15.1899
T3A;G49T	118	7.62712	120	1.66667	79	10.1266	126	7.14286	112	4.46429	101	7.92079	97	16.4948	136	2.94118	159	6.28931	115	3.47826
T3A;A50C	83	6.0241	63	6.34921	58	18.9655	94	6.38298	56	0	78	11.5385	55	18.1818	106	5.66038	112	8.03571	70	18.5714
T3A;A50G	69	10.1449	72	9.72222	36	44.4444	42	14.2857	49	18.3673	41	26.8293	38	44.7368	52	7.69231	65	12.3077	52	36.5385
T3A;A50T	107	8.41121	94	8.51064	75	24	104	11.5385	93	10.7527	69	7.24638	84	10.7143	95	9.47368	119	14.2857	85	4.70588
T3A;C51A	70	8.57143	73	21.9178	51	27.451	75	20	62	14.5161	66	15.1515	51	31.3725	89	6.74157	86	19.7674	77	14.2857
T3A;C51G	58	6.89655	77	14.2857	49	16.3265	78	14.1026	84	20.2381	68	20.5882	44	20.4545	103	16.5049	82	14.6341	72	19.4444
T3A;C51T	71	9.85915	55	16.3636	44	34.0909	77	27.2727	63	17.4603	65	15.3846	32	34.375	54	14.8148	97	11.3402	63	26.9841
T3A;G52A	63	1.5873	48	12.5	45	28.8889	82	21.9512	48	16.6667	57	14.0351	41	31.7073	54	11.1111	89	13.4831	43	30.2326
T3A;G52C	76	14.4737	82	14.6341	42	47.619	95	6.31579	52	11.5385	45	31.1111	53	43.3962	75	9.33333	75	20	57	26.3158
T3A;G52T	40	7.5	60	21.6667	51	15.6863	59	13.5593	50	10	57	12.2807	45	33.3333	81	8.64198	86	8.13953	56	23.2143
T3A;A53C	109	7.33945	119	10.9244	66	51.5152	96	28.125	86	8.13953	87	17.2414	83	49.3976	91	6.59341	113	9.73451	116	18.9655
T3A;A53G	82	6.09756	88	7.95455	58	67.2414	84	36.9048	70	10	61	42.623	49	75.5102	72	12.5	100	10	81	61.7284
T3A;A53T	107	13.0841	114	14.0351	91	8.79121	57	14.0351	105	15.2381	107	19.6262	78	16.6667	104	6.73077	150	13.3333	109	11.0092
T3A;C54A	107	42.0561	130	47.6923	86	50	106	39.6226	97	44.3299	86	34.8837	111	60.3604	124	44.3548	155	54.1935	110	60
T3A;C54G	110	16.3636	119	19.3277	98	18.3673	92	16.3043	77	18.1818	83	9.63855	81	44.4444	122	13.1148	107	10.2804	95	14.7368
T3A;C54T	120	6.66667	119	7.56303	74	5.40541	98	7.14286	101	3.9604	98	4.08163	99	14.1414	144	6.25	161	10.559	111	6.30631
T3A;C55A	84	5.95238	86	13.9535	57	47.3684	69	26.087	57	17.5439	71	19.7183	56	35.7143	67	11.9403	127	10.2362	69	33.3333
T3A;C55G	37	8.10811	39	20.5128	47	14.8936	43	16.2791	33	15.1515	57	19.2982	52	17.3077	45	13.3333	53	28.3019	55	20
T3A;C55T	66	22.7273	77	12.987	55	74.5455	55	50.9091	60	33.3333	64	57.8125	60	76.6667	64	46.875	66	18.1818	63	80.9524
T3A;C56A	70	5.71429	78	6.41026	31	32.2581	74	16.2162	70	5.71429	69	17.3913	57	56.1404	71	9.85915	99	7.07071	68	38.2353
T3A;C56G	71	2.8169	68	0	44	4.54545	49	2.04082	59	1.69492	41	4.87805	39	17.9487	68	1.47059	60	5	64	7.8125
T3A;C56T	70	11.4286	83	13.253	64	67.1875	64	32.8125	69	26.087	63	50.7937	73	76.7123	85	21.1765	117	13.6752	88	65.9091
T3A;T57A	60	5	75	4	35	54.2857	45	22.2222	48	6.25	41	26.8293	33	63.6364	46	4.34783	77	11.6883	35	48.5714
T3A;T57C	100	7	94	6.38298	29	72.4138	42	52.381	81	12.3457	28	64.2857	25	60	55	25.4545	116	11.2069	39	69.2308
T3A;T57G	52	0	66	9.09091	34	41.1765	66	21.2121	62	11.2903	36	16.6667	23	39.1304	51	11.7647	60	1.66667	44	18.1818
T3A;G58A	102	8.82353	93	15.0538	42	57.1429	86	36.0465	68	16.1765	55	56.3636	52	73.0769	82	21.9512	124	14.5161	60	61.6667
T3A;G58C	70	4.28571	59	13.5593	35	54.2857	37	56.7568	49	36.7347	30	56.6667	51	54.902	76	31.5789	73	28.7671	47	57.4468
T3A;G58T	93	23.6559	137	35.0365	110	81.8182	138	75.3623	127	53.5433	103	81.5534	112	83.9286	115	59.1304	151	42.3841	117	81.1966
T3A;C59A	94	25.5319	136	44.1176	95	88.4211	146	77.3973	114	58.7719	82	91.4634	108	85.1852	114	55.2632	124	32.2581	145	82.7586
T3A;C59G	56	3.57143	66	4.54545	26	34.6154	55	30.9091	45	8.88889	32	37.5	32	56.25	67	11.9403	66	6.06061	31	41.9355
T3A;C59T	93	18.2796	106	43.3962	58	81.0345	93	64.5161	65	58.4615	66	72.7273	62	69.3548	82	58.5366	94	34.0426	85	67.0588
T3A;A60C	89	8.98876	94	14.8936	44	79.5455	72	69.4444	69	13.0435	64	59.375	52	78.8462	80	35	128	15.625	63	66.6667
T3A;A60G	75	10.6667	83	8.43373	27	70.3704	47	72.3404	64	17.1875	48	58.3333	21	80.9524	72	33.3333	88	17.0455	34	64.7059
T3A;A60T	112	5.35714	101	10.8911	80	75	91	25.2747	89	7.86517	89	34.8315	83	67.4699	104	16.3462	133	8.27068	98	60.2041
T3A;G61A	75	8	81	14.8148	32	56.25	50	48	55	34.5455	34	64.7059	34	50	53	18.8679	106	18.8679	46	73.913
T3A;G61C	97	10.3093	101	16.8317	74	75.6757	73	83.5616	80	50	70	74.2857	82	82.9268	91	60.4396	109	31.1927	95	76.8421
T3A;G61T	90	6.66667	93	12.9032	44	70.4545	64	57.8125	97	25.7732	44	56.8182	57	85.9649	59	40.678	95	24.2105	58	77.5862
T3A;A62C	106	46.2264	121	63.6364	120	95	145	84.8276	100	73	117	90.5983	139	96.4029	142	85.9155	160	66.25	173	93.0636
T3A;A62G	49	20.4082	57	29.8246	30	43.3333	33	63.6364	41	46.3415	38	65.7895	40	60	58	43.1034	70	35.7143	60	73.3333
T3A;A62T	111	36.036	138	47.1014	132	87.1212	152	81.5789	118	57.6271	130	76.9231	175	92.5714	135	56.2963	170	53.5294	132	90.1515
T3A;G63A	149	6.71141	156	10.2564	134	87.3134	185	48.6486	142	11.2676	145	63.4483	141	85.8156	166	24.0964	174	18.3908	166	83.7349
T3A;G63C	144	17.3611	118	20.339	239	92.0502	245	68.5714	121	28.9256	223	85.6502	303	93.0693	141	39.7163	142	12.6761	246	92.6829
T3A;G63T	160	17.5	171	18.7135	376	94.6809	354	92.6554	166	54.8193	368	92.3913	427	96.9555	284	81.6901	200	26.5	400	95.75
T3A;A64C	85	10.5882	101	15.8416	182	90.6593	165	65.4545	118	13.5593	138	80.4348	195	91.2821	139	43.1655	104	9.61538	209	85.1675
T3A;A64G	79	20.2532	72	44.4444	57	70.1754	68	75	81	58.0247	79	77.2152	54	77.7778	82	64.6341	93	58.0645	83	84.3373
T3A;A64T	127	15.748	111	21.6216	178	94.382	210	86.1905	115	45.2174	182	89.5604	183	93.4426	147	64.6259	158	32.9114	219	90.8676
T3A;G65A	211	57.8199	255	70.5882	230	95.2174	337	95.549	249	92.3695	300	94	288	94.4444	341	92.3754	327	82.263	326	94.4785
T3A;G65C	67	13.4328	62	29.0323	105	89.5238	169	85.2071	103	75.7282	149	85.906	140	93.5714	136	80.8824	90	35.5556	150	89.3333
T3A;G65T	147	26.5306	186	50.5376	227	94.7137	332	94.2771	217	92.1659	283	93.6396	256	93.75	279	91.0394	270	67.037	276	93.1159
T3A;G66A	81	17.284	112	45.5357	73	80.8219	96	80.2083	72	76.3889	72	79.1667	81	93.8272	81	72.8395	125	66.4	87	85.0575
T3A;G66C	79	24.0506	90	20	182	94.5055	229	92.1397	170	78.8235	182	91.2088	197	95.9391	213	86.8545	124	47.5806	242	94.6281
T3A;G66T	82	40.2439	102	76.4706	98	93.8776	96	83.3333	129	90.6977	101	87.1287	92	94.5652	117	87.1795	134	73.8806	130	83.8462
T3A;C67A	56	7.14286	50	24	30	73.3333	39	64.1026	35	68.5714	35	62.8571	23	60.8696	34	50	65	41.5385	33	75.7576
T3A;C67G	44	4.54545	53	9.43396	22	45.4545	19	15.7895	57	8.77193	24	20.8333	18	44.4444	47	14.8936	61	13.1148	29	55.1724
T3A;C67T	54	9.25926	54	16.6667	24	66.6667	35	51.4286	36	36.1111	30	33.3333	27	37.037	39	38.4615	61	26.2295	41	56.0976
T3A;T68A	50	26	47	38.2979	33	75.7576	41	78.0488	34	64.7059	32	65.625	28	82.1429	36	66.6667	46	73.913	29	62.069
T3A;T68C	48	10.4167	52	48.0769	29	62.069	34	50	26	61.5385	28	60.7143	27	81.4815	27	62.963	67	43.2836	35	71.4286
T3A;T68G	45	8.88889	40	0	9	33.3333	38	21.0526	50	12	22	27.2727	16	43.75	60	13.3333	60	6.66667	25	60
T3A;G69A	103	72.8155	189	84.127	131	88.5496	171	85.3801	121	89.2562	135	83.7037	167	94.6108	173	83.815	205	84.878	150	91.3333
T3A;G69C	50	64	111	79.2793	92	86.9565	104	92.3077	65	87.6923	98	78.5714	101	94.0594	120	85	114	85.9649	130	93.0769
T3A;G69T	134	79.1045	200	89	152	90.7895	171	95.3216	157	86.6242	191	90.0524	170	92.9412	177	89.8305	237	89.4515	198	95.4545
T3A;A70C	83	57.8313	100	75	173	93.0636	213	93.8967	146	87.6712	166	95.1807	207	97.1014	192	88.0208	160	75	201	93.5323
T3A;A70G	78	8.97436	100	19	65	78.4615	102	69.6078	82	31.7073	61	81.9672	59	88.1356	84	35.7143	106	18.8679	87	88.5057
T3A;A70T	100	11	94	13.8298	150	80.6667	118	25.4237	103	8.73786	133	38.3459	164	76.2195	130	15.3846	125	11.2	160	70.625
T3A;A71C	163	62.5767	184	69.5652	230	97.3913	258	93.7984	162	74.6914	213	92.9577	227	96.0352	214	81.7757	184	67.3913	268	93.2836
T3A;A71G	73	28.7671	64	42.1875	86	84.8837	106	81.1321	88	76.1364	95	82.1053	91	93.4066	79	77.2152	83	57.8313	88	88.6364
T3A;A71T	126	39.6825	126	57.9365	192	94.7917	206	88.3495	164	81.7073	197	90.3553	204	90.1961	203	89.6552	199	54.7739	253	95.2569
T3A;A72C	133	42.8571	128	53.125	287	93.0314	221	77.3756	129	44.186	225	88.4444	218	96.3303	186	62.9032	173	41.6185	278	94.6043
T3A;A72G	106	24.5283	79	29.1139	74	93.2432	62	83.871	76	50	54	75.9259	59	83.0508	68	51.4706	89	35.9551	74	79.7297
T3A;A72T	137	55.4745	138	61.5942	201	97.0149	246	93.9024	154	74.026	211	90.9953	232	95.6897	206	83.4951	178	60.1124	233	93.133
T3C;C4A	0	NA	0	NA	0	NA	0	NA	0	NA	0	NA	0	NA	0	NA	1	0	0	NA
T3C;C4G	74	17.5676	70	18.5714	32	56.25	58	39.6552	55	32.7273	46	32.6087	35	54.2857	64	32.8125	74	13.5135	53	45.283
T3C;C4T	38	15.7895	40	25	20	55	32	46.875	45	37.7778	27	51.8519	28	50	52	40.3846	49	24.4898	26	57.6923
T3C;A5C	45	13.3333	42	21.4286	23	26.087	60	13.3333	37	21.6216	39	15.3846	35	20	49	24.4898	57	21.0526	43	18.6047
T3C;A5G	40	15	44	11.3636	25	84	34	35.2941	35	20	42	52.381	32	71.875	37	37.8378	51	17.6471	42	71.4286
T3C;A5T	15	0	25	8	8	12.5	18	16.6667	20	15	9	33.3333	11	9.09091	18	0	35	2.85714	11	36.3636
T3C;G6A	110	60	127	71.6535	84	89.2857	119	82.3529	110	75.4545	90	84.4444	98	89.7959	129	78.2946	154	74.6753	77	92.2078
T3C;G6C	89	40.4494	111	77.4775	70	84.2857	101	84.1584	76	65.7895	102	80.3922	80	92.5	85	68.2353	111	63.0631	104	80.7692
T3C;G6T	92	61.9565	133	80.4511	89	91.0112	141	87.234	106	67.9245	96	79.1667	107	93.4579	95	69.4737	141	82.2695	90	84.4444
T3C;C7A	151	73.5099	178	89.3258	101	86.1386	127	84.252	148	85.8108	141	84.3972	127	87.4016	161	86.9565	169	75.1479	154	83.7662
T3C;C7G	84	63.0952	104	74.0385	109	85.3211	108	81.4815	98	77.551	69	82.6087	84	88.0952	112	80.3571	109	62.3853	83	91.5663
T3C;C7T	97	42.268	136	65.4412	76	92.1053	112	83.9286	97	83.5052	93	73.1183	102	89.2157	103	74.7573	101	74.2574	88	90.9091
T3C;C8A	95	25.2632	83	32.5301	79	89.8734	106	70.7547	90	37.7778	93	76.3441	58	87.931	70	40	91	20.8791	95	83.1579
T3C;C8G	81	54.321	98	68.3673	87	86.2069	113	84.9558	82	80.4878	88	90.9091	108	94.4444	84	83.3333	102	71.5686	89	89.8876
T3C;C8T	57	10.5263	61	22.9508	70	81.4286	70	58.5714	61	27.8689	69	66.6667	59	77.9661	76	42.1053	81	16.0494	74	72.973
T3C;G9A	87	9.1954	90	4.44444	48	41.6667	96	8.33333	79	6.32911	64	14.0625	42	42.8571	86	4.65116	117	5.98291	69	31.8841
T3C;G9C	81	8.64198	92	1.08696	47	8.51064	92	4.34783	79	3.79747	102	5.88235	49	16.3265	81	3.7037	122	6.55738	78	2.5641
T3C;G9T	43	2.32558	53	1.88679	32	28.125	50	14	38	10.5263	46	2.17391	29	6.89655	63	1.5873	53	7.54717	56	19.6429
T3C;G10A	101	7.92079	93	13.9785	51	56.8627	79	24.0506	55	3.63636	67	37.3134	66	71.2121	92	14.1304	116	9.48276	64	35.9375
T3C;G10C	55	14.5455	63	26.9841	33	45.4545	55	21.8182	42	23.8095	53	28.3019	40	42.5	55	12.7273	58	25.8621	57	38.5965
T3C;G10T	71	4.22535	77	11.6883	39	28.2051	72	5.55556	57	10.5263	38	2.63158	34	32.3529	76	6.57895	75	12	51	23.5294
T3C;A11C	22	13.6364	41	19.5122	26	53.8462	29	13.7931	18	33.3333	21	42.8571	24	45.8333	35	17.1429	45	11.1111	24	37.5
T3C;A11G	44	9.09091	40	22.5	23	73.913	40	62.5	49	26.5306	36	50	34	79.4118	52	46.1538	46	26.087	31	70.9677
T3C;A11T	53	0	37	2.7027	20	35	48	18.75	29	6.89655	37	24.3243	27	18.5185	52	7.69231	52	3.84615	35	5.71429
T3C;A12C	52	5.76923	71	5.6338	23	39.1304	53	13.2075	35	11.4286	37	5.40541	32	43.75	45	11.1111	60	15	39	17.9487
T3C;A12G	37	5.40541	45	13.3333	25	64	41	26.8293	36	19.4444	26	38.4615	27	55.5556	54	25.9259	70	7.14286	33	54.5455
T3C;A12T	67	4.47761	50	0	32	12.5	67	1.49254	66	3.0303	47	6.38298	44	15.9091	69	2.89855	74	10.8108	54	18.5185
T3C;G13A	70	12.8571	58	25.8621	33	69.697	44	61.3636	53	41.5094	24	58.3333	47	70.2128	55	30.9091	66	30.303	42	66.6667
T3C;G13C	55	3.63636	66	19.697	43	32.5581	64	9.375	49	10.2041	45	13.3333	44	34.0909	55	7.27273	52	5.76923	46	26.087
T3C;G13T	74	20.2703	81	6.17284	31	54.8387	82	42.6829	63	23.8095	56	53.5714	42	61.9048	83	25.3012	98	14.2857	64	64.0625
T3C;C14A	77	11.6883	57	14.0351	63	9.52381	55	12.7273	55	3.63636	36	27.7778	33	27.2727	78	10.2564	82	28.0488	51	23.5294
T3C;C14G	79	11.3924	49	14.2857	28	10.7143	66	6.06061	39	15.3846	30	13.3333	38	18.4211	44	11.3636	67	13.4328	45	6.66667
T3C;C14T	74	5.40541	49	28.5714	41	17.0732	67	4.47761	51	13.7255	42	4.7619	56	17.8571	61	6.55738	69	5.7971	59	3.38983
T3C;G15A	65	9.23077	79	13.9241	49	4.08163	102	11.7647	49	6.12245	64	9.375	67	5.97015	78	6.41026	117	9.40171	81	8.64198
T3C;G15C	77	7.79221	106	10.3774	61	24.5902	88	23.8636	57	8.77193	61	21.3115	58	50	73	9.58904	101	14.8515	81	25.9259
T3C;G15T	67	20.8955	85	37.6471	51	33.3333	94	29.7872	67	34.3284	63	34.9206	55	27.2727	62	37.0968	77	29.8701	83	39.759
T3C;G16A	60	0	54	5.55556	47	6.38298	70	2.85714	53	1.88679	43	2.32558	43	6.97674	47	2.12766	64	3.125	69	1.44928
T3C;G16C	59	8.47458	55	18.1818	41	17.0732	60	10	58	13.7931	44	9.09091	52	19.2308	51	13.7255	67	13.4328	47	17.0213
T3C;G16T	54	0	50	4	57	10.5263	65	10.7692	47	12.766	54	9.25926	44	4.54545	63	9.52381	60	8.33333	57	7.01754
T3C;G17A	64	7.8125	76	11.8421	48	12.5	75	12	64	18.75	58	13.7931	52	28.8462	60	11.6667	91	18.6813	87	12.6437
T3C;G17C	81	16.0494	87	14.9425	56	32.1429	90	21.1111	50	20	78	24.359	66	51.5152	72	26.3889	80	23.75	74	25.6757
T3C;G17T	51	7.84314	45	6.66667	60	10	61	14.7541	40	20	51	17.6471	38	15.7895	51	5.88235	51	13.7255	49	10.2041
T3C;A18C	63	4.7619	64	4.6875	42	11.9048	69	11.5942	55	12.7273	45	17.7778	53	18.8679	78	14.1026	73	9.58904	68	8.82353
T3C;A18G	110	10.9091	91	17.5824	67	25.3731	108	12.963	87	18.3908	77	16.8831	83	19.2771	83	13.253	108	13.8889	74	17.5676
T3C;A18T	42	11.9048	36	5.55556	31	16.129	39	10.2564	34	14.7059	34	17.6471	29	13.7931	49	14.2857	43	13.9535	38	0
T3C;C19A	62	12.9032	60	25	45	13.3333	67	23.8806	39	15.3846	55	14.5455	50	8	66	15.1515	83	19.2771	54	9.25926
T3C;C19G	59	3.38983	51	19.6078	37	2.7027	55	25.4545	53	13.2075	51	9.80392	39	28.2051	54	3.7037	74	8.10811	55	7.27273
T3C;C19T	74	4.05405	53	9.43396	59	16.9492	53	5.66038	53	7.54717	51	7.84314	46	6.52174	47	2.12766	75	8	57	5.26316
T3C;G20A	58	15.5172	64	12.5	42	16.6667	87	16.092	59	8.47458	62	11.2903	67	47.7612	90	10	81	20.9877	57	31.5789
T3C;G20C	71	7.04225	52	13.4615	50	10	86	5.81395	82	4.87805	65	3.07692	59	6.77966	80	7.5	78	3.84615	78	5.12821
T3C;G20T	102	27.451	86	19.7674	62	22.5806	92	25	87	25.2874	74	31.0811	90	33.3333	95	8.42105	117	16.2393	98	16.3265
T3C;A21C	72	8.33333	78	10.2564	51	17.6471	69	8.69565	58	12.069	54	16.6667	56	16.0714	56	12.5	65	9.23077	66	7.57576
T3C;A21G	45	4.44444	58	20.6897	39	74.359	43	39.5349	43	16.2791	37	62.1622	38	76.3158	40	15	64	25	56	73.2143
T3C;A21T	57	10.5263	71	21.1268	38	36.8421	68	7.35294	62	4.83871	48	18.75	49	36.7347	54	5.55556	59	13.5593	55	29.0909
T3C;C22A	71	5.6338	75	18.6667	49	34.6939	67	17.9104	54	12.963	57	22.807	59	23.7288	80	11.25	77	18.1818	67	11.9403
T3C;C22G	32	3.125	40	10	35	2.85714	41	2.43902	45	4.44444	35	0	35	2.85714	37	8.10811	41	4.87805	40	2.5
T3C;C22T	73	4.10959	63	7.93651	34	8.82353	70	10	43	9.30233	49	2.04082	60	6.66667	58	8.62069	82	8.53659	48	6.25
T3C;C23A	44	11.3636	57	12.2807	34	14.7059	70	7.14286	38	5.26316	42	9.52381	31	22.5806	53	9.43396	65	15.3846	52	7.69231
T3C;C23G	30	20	26	23.0769	25	16	46	36.9565	22	50	20	20	37	32.4324	31	16.129	39	41.0256	21	47.619
T3C;C23T	47	6.38298	64	21.875	56	19.6429	61	11.4754	40	10	55	7.27273	67	17.9104	57	14.0351	67	13.4328	57	10.5263
T3C;C24A	55	12.7273	39	2.5641	51	11.7647	49	10.2041	35	25.7143	31	9.67742	47	12.766	48	6.25	60	13.3333	47	6.38298
T3C;C24G	47	19.1489	53	22.6415	46	13.0435	63	12.6984	45	13.3333	37	13.5135	46	21.7391	66	7.57576	62	6.45161	45	0
T3C;C24T	52	13.4615	58	25.8621	48	41.6667	60	13.3333	43	23.2558	62	14.5161	39	64.1026	59	20.339	68	5.88235	51	21.5686
T3C;G25A	80	5	91	6.59341	82	1.21951	99	6.06061	62	9.67742	57	7.01754	81	9.87654	75	5.33333	93	5.37634	85	3.52941
T3C;G25C	95	14.7368	95	10.5263	69	20.2899	80	11.25	96	8.33333	83	14.4578	68	33.8235	89	8.98876	113	7.9646	74	16.2162
T3C;G25T	61	13.1148	65	12.3077	43	11.6279	83	8.43373	65	15.3846	79	11.3924	62	12.9032	64	6.25	94	10.6383	69	21.7391
T3C;T26A	94	10.6383	91	27.4725	103	86.4078	101	37.6238	103	18.4466	102	63.7255	115	86.087	104	22.1154	113	14.1593	123	79.6748
T3C;T26C	86	25.5814	75	28	104	98.0769	104	76.9231	64	32.8125	82	82.9268	120	94.1667	74	51.3514	94	31.9149	115	87.8261
T3C;T26G	72	15.2778	77	32.4675	80	73.75	67	29.8507	63	26.9841	60	41.6667	78	83.3333	85	16.4706	77	23.3766	76	67.1053
T3C;T27A	95	17.8947	91	20.8791	126	87.3016	106	47.1698	76	25	107	63.5514	131	90.8397	85	17.6471	122	15.5738	133	76.6917
T3C;T27C	41	19.5122	56	16.0714	48	85.4167	63	53.9683	42	23.8095	61	62.2951	49	77.551	57	33.3333	56	8.92857	56	89.2857
T3C;T27G	73	12.3288	78	10.2564	72	38.8889	68	11.7647	63	12.6984	53	26.4151	69	56.5217	59	3.38983	85	9.41176	68	29.4118
T3C;T28A	100	15	94	23.4043	100	84	122	44.2623	75	28	100	61	137	86.8613	104	22.1154	101	15.8416	126	73.8095
T3C;T28C	54	9.25926	43	18.6047	39	69.2308	67	11.9403	30	13.3333	45	42.2222	28	71.4286	45	33.3333	63	14.2857	41	53.6585
T3C;T28G	56	17.8571	49	14.2857	44	43.1818	52	21.1538	42	23.8095	33	18.1818	42	38.0952	53	11.3208	61	8.19672	44	29.5455
T3C;T29A	92	21.7391	87	24.1379	125	83.2	109	56.8807	89	20.2247	103	66.0194	121	91.7355	97	26.8041	108	25.9259	109	77.9817
T3C;T29C	90	53.3333	94	53.1915	91	86.8132	117	82.906	81	75.3086	97	81.4433	92	93.4783	109	67.8899	74	63.5135	118	89.8305
T3C;T29G	80	6.25	73	19.1781	84	60.7143	69	21.7391	67	10.4478	70	25.7143	78	52.5641	68	7.35294	86	9.30233	64	37.5
T3C;C30A	82	7.31707	69	20.2899	55	54.5455	83	24.0964	66	7.57576	73	39.726	62	77.4194	71	12.6761	78	6.41026	79	64.557
T3C;C30G	58	10.3448	66	6.06061	48	41.6667	75	13.3333	51	7.84314	53	26.4151	50	64	53	13.2075	76	14.4737	59	37.2881
T3C;C30T	66	12.1212	87	25.2874	87	82.7586	80	37.5	66	16.6667	79	56.962	68	88.2353	78	30.7692	110	12.7273	79	86.0759
T3C;C31A	67	1.49254	80	2.5	19	47.3684	28	7.14286	56	5.35714	31	9.67742	34	58.8235	58	3.44828	100	4	27	59.2593
T3C;C31G	66	4.54545	56	21.4286	55	80	86	50	65	27.6923	74	52.7027	49	81.6327	55	27.2727	76	23.6842	73	75.3425
T3C;C31T	77	7.79221	94	14.8936	39	74.359	59	22.0339	69	10.1449	47	34.0426	53	83.0189	70	15.7143	93	7.52688	63	68.254
T3C;C32A	72	13.8889	71	18.3099	50	88	77	49.3506	63	17.4603	54	64.8148	50	84	60	23.3333	72	20.8333	59	74.5763
T3C;C32G	35	31.4286	41	41.4634	36	75	42	61.9048	46	73.913	33	72.7273	25	68	53	54.717	57	50.8772	31	96.7742
T3C;C32T	77	16.8831	84	21.4286	65	92.3077	75	57.3333	64	25	68	69.1176	63	84.127	74	18.9189	110	21.8182	68	83.8235
T3C;T33A	86	20.9302	83	22.8916	105	83.8095	81	56.7901	78	35.8974	84	60.7143	81	93.8272	61	22.9508	70	32.8571	98	82.6531
T3C;T33C	51	11.7647	62	16.129	49	75.5102	87	54.023	64	20.3125	65	60	73	79.4521	57	40.3509	89	30.3371	75	76
T3C;T33G	56	33.9286	77	23.3766	56	44.6429	44	22.7273	60	33.3333	54	24.0741	64	50	69	20.2899	66	24.2424	58	36.2069
T3C;C34A	91	37.3626	111	27.027	128	90.625	129	73.6434	121	47.1074	110	81.8182	117	91.453	111	42.3423	124	23.3871	116	87.931
T3C;C34G	96	29.1667	122	43.4426	97	90.7216	119	79.8319	86	53.4884	118	82.2034	112	91.0714	101	50.495	95	37.8947	100	84
T3C;C34T	112	16.9643	142	26.7606	110	84.5455	131	63.3588	93	35.4839	128	75	137	89.781	124	33.871	131	29.771	111	81.982
T3C;T35A	73	16.4384	68	38.2353	90	84.4444	77	54.5455	61	36.0656	74	59.4595	94	84.0426	78	55.1282	70	28.5714	93	83.871
T3C;T35C	66	28.7879	71	23.9437	71	90.1408	84	66.6667	53	32.0755	62	67.7419	81	79.0123	45	28.8889	70	21.4286	77	79.2208
T3C;T35G	88	52.2727	110	69.0909	110	91.8182	109	75.2294	91	72.5275	112	86.6071	136	94.1176	116	68.1034	113	59.292	117	83.7607
T3C;T36A	60	21.6667	57	10.5263	37	78.3784	60	56.6667	51	39.2157	43	53.4884	46	78.2609	56	30.3571	75	14.6667	48	60.4167
T3C;T36C	48	8.33333	44	6.81818	41	31.7073	58	12.069	35	5.71429	30	26.6667	33	48.4848	50	10	44	6.81818	53	33.9623
T3C;T36G	56	35.7143	71	45.0704	52	84.6154	75	89.3333	57	77.193	59	74.5763	55	83.6364	77	58.4416	90	33.3333	75	84
T3C;T37A	65	6.15385	90	16.6667	27	70.3704	56	57.1429	49	18.3673	39	51.2821	24	75	62	22.5806	78	10.2564	49	65.3061
T3C;T37C	73	20.5479	50	18	51	78.4314	69	31.8841	36	36.1111	53	37.7358	44	68.1818	51	15.6863	57	22.807	60	51.6667
T3C;T37G	57	14.0351	53	24.5283	30	86.6667	56	78.5714	45	46.6667	42	59.5238	39	82.0513	44	52.2727	71	26.7606	55	83.6364
T3C;C38A	66	4.54545	71	15.493	43	74.4186	35	57.1429	60	16.6667	52	44.2308	46	67.3913	53	18.8679	70	12.8571	43	60.4651
T3C;C38G	63	4.7619	67	17.9104	50	78	65	43.0769	65	20	43	65.1163	57	71.9298	52	25	81	19.7531	64	78.125
T3C;C38T	59	1.69492	54	7.40741	23	73.913	48	35.4167	46	8.69565	39	64.1026	28	60.7143	69	24.6377	72	18.0556	41	63.4146
T3C;A39C	63	12.6984	59	16.9492	54	75.9259	55	27.2727	56	17.8571	52	53.8462	51	78.4314	64	21.875	76	11.8421	74	62.1622
T3C;A39G	73	17.8082	59	16.9492	46	76.087	80	38.75	64	15.625	71	60.5634	57	71.9298	76	19.7368	86	17.4419	70	61.4286
T3C;A39T	66	13.6364	73	16.4384	77	74.026	69	56.5217	52	19.2308	70	71.4286	72	80.5556	68	39.7059	74	33.7838	84	66.6667
T3C;T40A	78	7.69231	73	12.3288	44	61.3636	62	53.2258	47	17.0213	46	52.1739	36	69.4444	53	20.7547	74	17.5676	62	54.8387
T3C;T40C	52	7.69231	45	20	37	70.2703	62	53.2258	34	14.7059	36	61.1111	27	55.5556	62	33.871	53	16.9811	43	72.093
T3C;T40G	60	15	61	11.4754	38	73.6842	65	41.5385	48	16.6667	52	46.1538	29	62.069	42	19.0476	75	12	44	47.7273
T3C;T41A	73	8.21918	83	14.4578	48	58.3333	71	57.7465	52	25	47	59.5745	57	70.1754	66	12.1212	57	12.2807	41	78.0488
T3C;T41C	42	9.52381	46	15.2174	42	47.619	33	42.4242	44	11.3636	39	58.9744	34	70.5882	56	17.8571	52	17.3077	40	72.5
T3C;T41G	67	8.95522	55	5.45455	38	57.8947	64	15.625	51	11.7647	44	9.09091	29	79.3103	54	7.40741	77	18.1818	40	45
T3C;G42A	86	5.81395	81	8.64198	38	71.0526	75	53.3333	62	17.7419	36	30.5556	42	71.4286	57	14.0351	87	6.89655	49	55.102
T3C;G42C	72	16.6667	69	11.5942	50	80	76	52.6316	57	24.5614	50	52	51	78.4314	61	34.4262	83	14.4578	65	72.3077
T3C;G42T	79	10.1266	91	18.6813	49	69.3878	57	54.386	65	29.2308	42	73.8095	49	83.6735	63	28.5714	96	16.6667	74	68.9189
T3C;C43A	75	9.33333	82	12.1951	56	71.4286	73	31.5068	61	9.83607	65	46.1538	63	80.9524	82	17.0732	85	5.88235	77	53.2468
T3C;C43G	75	6.66667	80	8.75	50	44	89	5.61798	53	9.43396	65	12.3077	45	44.4444	84	9.52381	82	6.09756	69	23.1884
T3C;C43T	68	4.41176	77	15.5844	33	51.5152	71	43.662	78	24.359	47	44.6809	47	74.4681	60	21.6667	90	11.1111	65	58.4615
T3C;G44A	77	6.49351	82	9.7561	36	44.4444	79	6.32911	77	6.49351	79	13.9241	40	32.5	77	9.09091	89	3.37079	73	19.1781
T3C;G44C	82	46.3415	99	50.5051	85	77.6471	96	68.75	91	60.4396	68	64.7059	59	71.1864	80	47.5	109	48.6239	84	82.1429
T3C;G44T	72	9.72222	71	19.7183	47	65.9574	93	24.7312	57	15.7895	51	33.3333	47	63.8298	83	15.6627	99	16.1616	58	53.4483
T3C;C45A	74	9.45946	60	3.33333	58	18.9655	78	16.6667	81	12.3457	71	15.493	77	40.2597	84	9.52381	99	10.101	63	12.6984
T3C;C45G	70	1.42857	67	2.98507	29	34.4828	46	23.913	63	9.52381	39	10.2564	30	40	55	3.63636	68	7.35294	45	8.88889
T3C;C45T	60	6.66667	69	13.0435	30	63.3333	65	35.3846	56	10.7143	43	18.6047	44	52.2727	82	23.1707	92	13.0435	41	46.3415
T3C;G46A	75	18.6667	78	41.0256	35	65.7143	69	65.2174	35	57.1429	50	78	43	72.093	46	58.6957	67	35.8209	53	77.3585
T3C;G46C	102	13.7255	76	6.57895	71	49.2958	82	21.9512	74	18.9189	81	25.9259	69	46.3768	61	8.19672	101	18.8119	65	27.6923
T3C;G46T	86	13.9535	79	21.519	49	12.2449	99	18.1818	73	27.3973	85	24.7059	83	19.2771	79	11.3924	100	30	83	10.8434
T3C;G47A	101	34.6535	100	47	90	50	80	42.5	83	53.012	66	45.4545	93	62.3656	77	35.0649	110	48.1818	78	52.5641
T3C;G47C	82	54.878	79	54.4304	44	50	76	51.3158	59	54.2373	88	62.5	74	67.5676	67	31.3433	78	33.3333	73	39.726
T3C;G47T	90	44.4444	106	56.6038	76	55.2632	84	47.619	87	51.7241	73	57.5342	76	63.1579	101	38.6139	103	47.5728	75	50.6667
T3C;G48A	77	25.974	90	51.1111	71	50.7042	73	39.726	66	51.5152	64	57.8125	69	52.1739	81	40.7407	91	28.5714	85	42.3529
T3C;G48C	64	56.25	69	68.1159	54	38.8889	72	65.2778	69	71.0145	55	63.6364	59	52.5424	70	62.8571	77	63.6364	70	58.5714
T3C;G48T	116	64.6552	113	76.9912	81	61.7284	125	74.4	103	71.8447	85	63.5294	70	67.1429	107	60.7477	122	68.0328	136	71.3235
T3C;G49A	89	7.86517	82	10.9756	44	13.6364	72	8.33333	65	7.69231	67	13.4328	80	8.75	71	8.4507	76	19.7368	60	8.33333
T3C;G49C	61	8.19672	71	7.04225	55	23.6364	79	7.59494	75	22.6667	62	17.7419	51	50.9804	62	16.129	98	16.3265	86	12.7907
T3C;G49T	83	6.0241	94	9.57447	81	6.17284	115	5.21739	89	6.74157	72	8.33333	83	13.253	113	7.9646	107	9.34579	93	9.67742
T3C;A50C	63	7.93651	43	4.65116	35	5.71429	50	16	46	13.0435	44	13.6364	50	6	60	6.66667	62	6.45161	42	11.9048
T3C;A50G	55	12.7273	66	19.697	33	36.3636	50	18	24	29.1667	37	32.4324	35	57.1429	50	4	64	17.1875	55	49.0909
T3C;A50T	66	7.57576	76	10.5263	45	15.5556	69	10.1449	76	3.94737	66	12.1212	70	12.8571	95	4.21053	82	4.87805	65	15.3846
T3C;C51A	49	16.3265	64	31.25	34	29.4118	59	33.8983	47	36.1702	49	28.5714	33	57.5758	53	15.0943	84	38.0952	63	46.0317
T3C;C51G	55	23.6364	51	60.7843	27	25.9259	72	33.3333	49	48.9796	31	41.9355	56	35.7143	54	20.3704	76	35.5263	60	36.6667
T3C;C51T	39	7.69231	54	14.8148	35	17.1429	61	14.7541	58	20.6897	62	16.129	39	53.8462	61	19.6721	62	20.9677	44	18.1818
T3C;G52A	74	9.45946	56	7.14286	41	26.8293	64	17.1875	64	12.5	36	19.4444	49	34.6939	53	7.54717	68	17.6471	54	14.8148
T3C;G52C	94	15.9574	64	14.0625	60	18.3333	70	17.1429	85	8.23529	65	9.23077	54	3.7037	64	1.5625	104	14.4231	67	5.97015
T3C;G52T	63	7.93651	78	19.2308	44	9.09091	63	12.6984	69	5.7971	51	7.84314	61	8.19672	68	2.94118	76	7.89474	61	19.6721
T3C;A53C	77	9.09091	76	14.4737	58	31.0345	82	23.1707	70	12.8571	69	11.5942	54	55.5556	86	13.9535	89	7.86517	65	26.1538
T3C;A53G	63	11.1111	56	7.14286	34	64.7059	61	11.4754	47	8.51064	41	41.4634	46	67.3913	44	15.9091	75	9.33333	53	49.0566
T3C;A53T	85	14.1176	85	7.05882	64	9.375	88	7.95455	61	11.4754	67	11.9403	49	10.2041	79	7.59494	86	4.65116	72	18.0556
T3C;C54A	138	76.087	96	68.75	64	57.8125	114	77.193	69	72.4638	83	61.4458	62	50	87	56.3218	142	73.2394	80	58.75
T3C;C54G	74	20.2703	63	23.8095	43	11.6279	69	10.1449	52	15.3846	51	11.7647	48	14.5833	58	13.7931	54	11.1111	64	7.8125
T3C;C54T	88	9.09091	96	10.4167	62	9.67742	87	16.092	86	10.4651	97	5.15464	81	8.64198	82	7.31707	103	5.82524	83	7.22892
T3C;C55A	65	64.6154	80	26.25	59	38.9831	80	58.75	70	42.8571	51	50.9804	50	50	61	34.4262	81	49.3827	64	34.375
T3C;C55G	47	63.8298	35	42.8571	27	40.7407	35	57.1429	37	51.3514	34	64.7059	27	22.2222	28	32.1429	42	57.1429	38	7.89474
T3C;C55T	76	52.6316	81	55.5556	52	84.6154	74	60.8108	62	64.5161	59	67.7966	57	71.9298	70	52.8571	63	50.7937	62	75.8065
T3C;C56A	69	44.9275	80	36.25	46	58.6957	70	35.7143	62	43.5484	49	53.0612	52	53.8462	53	28.3019	70	30	54	42.5926
T3C;C56G	70	4.28571	49	8.16327	36	11.1111	42	2.38095	46	4.34783	42	4.7619	26	15.3846	49	2.04082	52	3.84615	56	16.0714
T3C;C56T	69	20.2899	48	27.0833	59	66.1017	59	32.2034	60	26.6667	58	39.6552	69	55.0725	62	29.0323	78	28.2051	60	55
T3C;T57A	49	6.12245	54	1.85185	23	73.913	49	26.5306	44	20.4545	39	35.8974	30	53.3333	50	10	64	12.5	26	42.3077
T3C;T57C	74	4.05405	70	8.57143	30	73.3333	52	46.1538	78	17.9487	40	57.5	21	80.9524	76	26.3158	85	11.7647	35	68.5714
T3C;T57G	41	4.87805	58	13.7931	26	30.7692	60	21.6667	47	17.0213	38	15.7895	22	50	50	12	49	4.08163	32	37.5
T3C;G58A	68	26.4706	85	28.2353	36	69.4444	62	41.9355	50	20	52	55.7692	60	63.3333	64	28.125	111	27.9279	43	58.1395
T3C;G58C	48	39.5833	56	26.7857	38	81.5789	72	62.5	47	42.5532	51	49.0196	40	72.5	71	39.4366	79	34.1772	66	63.6364
T3C;G58T	98	35.7143	87	52.8736	68	82.3529	80	62.5	87	57.4713	61	52.459	82	84.1463	63	42.8571	99	40.404	86	73.2558
T3C;C59A	87	18.3908	87	8.04598	69	26.087	97	8.24742	58	8.62069	73	19.1781	83	32.5301	85	11.7647	81	9.87654	65	16.9231
T3C;C59G	64	9.375	51	3.92157	33	27.2727	56	10.7143	37	5.40541	51	11.7647	52	36.5385	53	3.77358	75	9.33333	60	11.6667
T3C;C59T	81	11.1111	70	8.57143	55	38.1818	90	20	51	13.7255	55	25.4545	40	45	64	9.375	78	12.8205	68	26.4706
T3C;A60C	83	33.7349	74	41.8919	54	83.3333	61	47.541	60	30	44	56.8182	52	76.9231	53	37.7358	73	32.8767	56	67.8571
T3C;A60G	84	5.95238	52	5.76923	31	80.6452	50	52	40	7.5	40	70	40	70	55	25.4545	59	10.1695	42	88.0952
T3C;A60T	108	4.62963	83	4.81928	50	62	80	5	73	13.6986	56	16.0714	60	50	64	3.125	87	8.04598	66	31.8182
T3C;G61A	64	1.5625	74	12.1622	44	72.7273	49	34.6939	78	12.8205	44	52.2727	37	67.5676	63	25.3968	71	9.85915	45	80
T3C;G61C	84	8.33333	92	26.087	69	71.0145	77	67.5325	66	36.3636	62	72.5806	69	78.2609	81	53.0864	97	35.0515	88	80.6818
T3C;G61T	99	8.08081	95	10.5263	41	75.6098	79	30.3797	59	18.6441	47	61.7021	70	82.8571	80	32.5	101	8.91089	65	66.1538
T3C;A62C	93	56.9892	78	64.1026	72	91.6667	128	83.5938	83	77.1084	92	89.1304	117	96.5812	88	81.8182	104	69.2308	93	91.3978
T3C;A62G	37	40.5405	50	60	25	64	45	62.2222	35	60	37	62.1622	35	65.7143	60	56.6667	60	46.6667	27	62.963
T3C;A62T	89	44.9438	93	54.8387	105	93.3333	141	76.5957	106	66.0377	117	83.7607	124	87.0968	122	68.0328	124	56.4516	109	86.2385
T3C;G63A	98	8.16327	106	12.2642	96	87.5	154	49.3506	77	14.2857	127	64.5669	114	89.4737	101	21.7822	109	9.17431	136	84.5588
T3C;G63C	95	13.6842	106	19.8113	184	91.3043	171	63.1579	98	34.6939	148	84.4595	183	92.8962	106	34.9057	109	18.3486	234	87.6068
T3C;G63T	104	7.69231	100	2	138	88.4058	152	58.5526	79	17.7215	140	77.1429	139	91.3669	134	22.3881	112	3.57143	121	79.3388
T3C;A64C	77	10.3896	93	15.0538	115	88.6957	125	51.2	68	14.7059	118	73.7288	139	90.6475	86	23.2558	74	10.8108	160	82.5
T3C;A64G	66	34.8485	74	45.9459	54	85.1852	86	86.0465	59	57.6271	65	76.9231	66	78.7879	65	69.2308	87	60.9195	95	88.4211
T3C;A64T	95	8.42105	81	13.5802	82	80.4878	94	60.6383	53	16.9811	75	77.3333	97	91.7526	62	33.871	88	6.81818	88	86.3636
T3C;G65A	60	5	60	6.66667	107	91.5888	96	77.0833	59	18.6441	99	73.7374	117	91.453	84	28.5714	60	3.33333	77	84.4156
T3C;G65C	32	0	44	0	49	73.4694	66	45.4545	37	2.7027	57	68.4211	59	86.4407	62	19.3548	47	2.12766	66	65.1515
T3C;G65T	34	2.94118	48	12.5	96	87.5	90	67.7778	56	12.5	72	75	98	88.7755	58	15.5172	44	11.3636	96	81.25
T3C;G66A	53	0	63	9.52381	71	77.4648	71	53.5211	63	14.2857	72	69.4444	66	81.8182	75	17.3333	84	7.14286	91	81.3187
T3C;G66C	57	3.50877	73	6.84932	129	94.5736	121	79.3388	68	44.1176	112	86.6071	125	92.8	88	65.9091	92	17.3913	136	92.6471
T3C;G66T	97	9.27835	93	13.9785	77	92.2078	95	80	62	22.5806	71	63.3803	105	91.4286	69	42.029	112	13.3929	100	82
T3C;C67A	48	25	56	25	34	70.5882	62	64.5161	37	27.027	41	78.0488	42	78.5714	50	34	62	30.6452	42	66.6667
T3C;C67G	43	11.6279	59	10.1695	27	59.2593	33	42.4242	44	25	36	50	27	81.4815	37	18.9189	88	5.68182	30	60
T3C;C67T	46	15.2174	54	18.5185	44	61.3636	27	48.1481	50	20	29	37.931	34	70.5882	51	25.4902	69	20.2899	39	69.2308
T3C;T68A	60	10	60	25	34	73.5294	57	68.4211	57	19.2982	41	75.6098	50	86	38	28.9474	70	7.14286	49	75.5102
T3C;T68C	37	0	41	9.7561	31	83.871	48	50	37	16.2162	38	55.2632	23	78.2609	41	14.6341	53	13.2075	41	75.6098
T3C;T68G	41	4.87805	36	5.55556	16	62.5	41	24.3902	23	4.34783	23	21.7391	17	58.8235	50	2	46	8.69565	31	41.9355
T3C;G69A	68	19.1176	74	33.7838	93	88.172	85	61.1765	67	32.8358	79	77.2152	81	90.1235	90	22.2222	89	29.2135	72	81.9444
T3C;G69C	40	12.5	49	28.5714	71	87.3239	74	62.1622	39	28.2051	46	73.913	73	95.8904	53	49.0566	51	23.5294	59	84.7458
T3C;G69T	74	25.6757	66	34.8485	85	83.5294	88	68.1818	48	35.4167	75	77.3333	66	89.3939	71	39.4366	62	24.1935	87	79.3103
T3C;A70C	25	0	21	0	36	97.2222	47	68.0851	22	18.1818	48	81.25	57	82.4561	29	41.3793	30	20	49	79.5918
T3C;A70G	74	10.8108	92	9.78261	69	33.3333	76	15.7895	76	9.21053	68	17.6471	83	37.3494	74	5.40541	105	11.4286	88	15.9091
T3C;A70T	39	7.69231	52	34.6154	63	87.3016	60	55	51	31.3725	59	74.5763	72	97.2222	44	31.8182	65	29.2308	84	82.1429
T3C;A71C	42	7.14286	30	33.3333	57	87.7193	53	49.0566	37	16.2162	75	81.3333	63	88.8889	60	41.6667	44	25	72	80.5556
T3C;A71G	63	15.873	67	13.4328	86	87.2093	71	59.1549	48	12.5	105	72.381	102	91.1765	79	40.5063	78	7.69231	111	88.2883
T3C;A71T	83	9.63855	63	7.93651	90	88.8889	70	47.1429	47	17.0213	78	70.5128	85	85.8824	67	26.8657	77	12.987	57	61.4035
T3C;A72C	88	20.4545	80	20	179	95.5307	126	52.381	77	25.974	106	72.6415	174	91.3793	100	43	115	16.5217	185	94.0541
T3C;A72G	33	18.1818	46	21.7391	71	85.9155	88	76.1364	38	21.0526	91	83.5165	60	96.6667	68	58.8235	53	15.0943	72	87.5
T3C;A72T	75	29.3333	71	30.9859	95	92.6316	88	70.4545	49	36.7347	72	70.8333	84	89.2857	65	29.2308	64	34.375	84	90.4762
T3G;C4A	67	20.8955	44	22.7273	29	55.1724	38	47.3684	42	57.1429	34	35.2941	33	60.6061	54	44.4444	60	35	39	48.7179
T3G;C4G	42	16.6667	47	42.5532	30	53.3333	50	48	49	59.1837	40	50	38	55.2632	57	59.6491	62	38.7097	32	53.125
T3G;C4T	71	16.9014	70	24.2857	31	64.5161	60	68.3333	34	32.3529	35	42.8571	47	65.9574	49	51.0204	74	39.1892	54	64.8148
T3G;A5C	49	16.3265	47	19.1489	33	66.6667	22	59.0909	45	55.5556	37	51.3514	36	72.2222	44	43.1818	63	28.5714	36	72.2222
T3G;A5G	77	28.5714	60	35	49	81.6327	58	75.8621	59	64.4068	76	81.5789	72	90.2778	74	66.2162	94	39.3617	83	81.9277
T3G;A5T	39	7.69231	28	10.7143	7	14.2857	17	47.0588	19	21.0526	10	40	11	27.2727	15	33.3333	34	17.6471	28	39.2857
T3G;G6A	96	72.9167	133	84.9624	115	95.6522	149	92.6174	126	88.0952	91	82.4176	129	91.4729	131	90.8397	155	91.6129	140	92.1429
T3G;G6C	58	60.3448	94	61.7021	64	82.8125	89	78.6517	74	75.6757	90	73.3333	75	81.3333	76	60.5263	122	61.4754	107	90.6542
T3G;G6T	111	49.5495	145	63.4483	126	92.8571	168	88.0952	134	82.0896	145	85.5172	149	91.9463	138	78.9855	168	66.0714	147	95.9184
T3G;C7A	107	71.028	161	80.7453	114	91.2281	126	88.0952	138	86.2319	127	82.6772	143	86.014	152	82.8947	169	86.3905	143	88.8112
T3G;C7G	125	79.2	156	87.8205	115	86.087	161	89.441	139	96.4029	144	86.8056	153	96.0784	132	82.5758	167	84.4311	154	87.6623
T3G;C7T	131	67.9389	194	79.8969	124	89.5161	169	86.9822	147	84.3537	166	87.9518	200	91.5	183	85.2459	235	80.8511	220	93.1818
T3G;C8A	122	40.1639	124	58.871	166	91.5663	191	85.8639	149	75.8389	204	89.7059	178	93.2584	203	81.7734	174	59.7701	189	89.418
T3G;C8G	117	73.5043	104	88.4615	119	89.0756	86	93.0233	128	91.4062	96	92.7083	122	95.082	119	90.7563	165	91.5152	119	90.7563
T3G;C8T	132	49.2424	137	58.3942	114	92.1053	171	85.3801	125	75.2	142	88.0282	143	89.5105	147	75.5102	146	60.274	184	90.2174
T3G;G9A	138	9.42029	99	14.1414	106	73.5849	119	29.4118	93	20.4301	105	24.7619	91	75.8242	144	14.5833	112	13.3929	111	50.4505
T3G;G9C	108	8.33333	104	7.69231	83	18.0723	80	5	86	5.81395	83	14.4578	79	31.6456	108	4.62963	122	10.6557	88	19.3182
T3G;G9T	115	7.82609	114	8.77193	48	33.3333	122	19.6721	82	10.9756	91	19.7802	61	26.2295	101	9.90099	121	11.5702	92	30.4348
T3G;G10A	103	14.5631	122	19.6721	127	89.7638	131	52.6718	94	27.6596	137	63.5036	133	88.7218	124	45.9677	134	19.403	127	83.4646
T3G;G10C	52	19.2308	75	13.3333	64	56.25	62	22.5806	65	15.3846	63	19.0476	62	58.0645	70	8.57143	95	10.5263	70	44.2857
T3G;G10T	122	9.83607	129	12.4031	89	53.9326	127	17.3228	106	10.3774	109	24.7706	101	60.396	104	15.3846	155	14.8387	117	36.7521
T3G;A11C	51	15.6863	65	10.7692	36	52.7778	58	15.5172	48	8.33333	38	15.7895	49	46.9388	66	10.6061	58	5.17241	43	48.8372
T3G;A11G	54	38.8889	82	31.7073	87	88.5057	112	88.3929	82	68.2927	80	88.75	85	92.9412	94	72.3404	96	56.25	117	88.0342
T3G;A11T	91	4.3956	96	11.4583	60	35	90	14.4444	80	13.75	62	27.4194	64	60.9375	86	16.2791	116	18.1034	79	41.7722
T3G;A12C	79	7.59494	90	8.88889	47	53.1915	64	10.9375	64	4.6875	78	19.2308	70	68.5714	68	8.82353	74	14.8649	86	27.907
T3G;A12G	74	13.5135	72	9.72222	73	83.5616	73	49.3151	62	30.6452	64	62.5	70	84.2857	71	33.8028	103	15.534	81	81.4815
T3G;A12T	98	5.10204	93	9.67742	63	20.6349	96	7.29167	83	7.22892	111	11.7117	58	39.6552	86	8.13953	97	13.4021	71	16.9014
T3G;G13A	115	45.2174	111	66.6667	106	84.9057	144	81.9444	101	86.1386	108	87.963	112	92.8571	124	75	166	77.7108	131	86.2595
T3G;G13C	96	22.9167	100	23	62	70.9677	106	66.0377	86	40.6977	98	66.3265	88	85.2273	74	40.5405	123	29.2683	92	80.4348
T3G;G13T	107	21.4953	136	37.5	73	80.8219	117	74.359	94	57.4468	99	66.6667	98	82.6531	105	61.9048	148	33.1081	118	72.0339
T3G;C14A	126	32.5397	111	24.3243	85	35.2941	134	32.0896	97	34.0206	85	42.3529	94	29.7872	107	26.1682	112	31.25	95	32.6316
T3G;C14G	106	35.8491	93	26.8817	53	28.3019	103	34.9515	79	26.5823	86	26.7442	82	46.3415	82	18.2927	109	30.2752	91	28.5714
T3G;C14T	101	26.7327	98	19.3878	83	30.1205	110	20	82	23.1707	70	28.5714	88	36.3636	95	22.1053	153	16.9935	100	32
T3G;G15A	88	12.5	115	5.21739	89	7.86517	102	8.82353	102	5.88235	95	10.5263	70	5.71429	122	11.4754	129	6.97674	118	7.62712
T3G;G15C	90	16.6667	129	31.7829	67	56.7164	112	28.5714	87	25.2874	86	38.3721	83	46.988	95	23.1579	132	24.2424	102	37.2549
T3G;G15T	113	10.6195	118	21.1864	76	17.1053	111	12.6126	77	14.2857	89	16.8539	87	19.5402	106	16.9811	144	15.9722	99	16.1616
T3G;G16A	107	10.2804	122	8.19672	71	11.2676	111	13.5135	122	8.19672	109	10.0917	87	14.9425	134	10.4478	145	9.65517	135	12.5926
T3G;G16C	99	9.09091	109	22.0183	70	18.5714	79	17.7215	75	21.3333	96	19.7917	72	27.7778	78	3.84615	121	19.0083	93	15.0538
T3G;G16T	136	15.4412	122	13.9344	89	21.3483	132	17.4242	98	19.3878	90	6.66667	111	21.6216	130	16.9231	135	14.8148	117	17.9487
T3G;G17A	100	19	131	22.1374	102	33.3333	139	25.8993	115	15.6522	110	21.8182	119	56.3025	115	16.5217	166	25.3012	122	19.6721
T3G;G17C	76	40.7895	69	49.2754	54	53.7037	91	54.9451	69	53.6232	80	45	61	44.2623	80	37.5	81	53.0864	78	48.7179
T3G;G17T	117	11.9658	160	20	105	37.1429	111	19.8198	90	23.3333	113	23.8938	120	46.6667	112	11.6071	149	14.094	112	29.4643
T3G;A18C	81	9.87654	62	9.67742	58	25.8621	62	9.67742	77	9.09091	90	12.2222	55	29.0909	80	20	89	5.61798	75	21.3333
T3G;A18G	103	16.5049	111	14.4144	80	22.5	97	16.4948	87	10.3448	105	14.2857	83	31.3253	92	16.3043	108	22.2222	110	20
T3G;A18T	67	8.95522	45	8.88889	44	13.6364	54	5.55556	37	8.10811	44	9.09091	46	15.2174	50	8	48	2.08333	59	11.8644
T3G;C19A	133	39.8496	138	37.6812	94	42.5532	147	37.415	100	37	122	40.1639	132	57.5758	112	34.8214	136	33.8235	121	39.6694
T3G;C19G	72	15.2778	58	15.5172	58	13.7931	96	18.75	76	10.5263	75	9.33333	75	10.6667	70	22.8571	101	13.8614	109	20.1835
T3G;C19T	105	4.7619	122	10.6557	71	14.0845	98	20.4082	103	20.3883	101	12.8713	61	24.5902	127	4.72441	143	11.1888	102	19.6078
T3G;G20A	81	51.8519	132	70.4545	88	65.9091	111	78.3784	95	70.5263	108	70.3704	135	72.5926	99	54.5455	147	59.8639	110	83.6364
T3G;G20C	110	5.45455	89	16.8539	76	9.21053	108	6.48148	100	7	75	12	107	14.9533	106	10.3774	128	11.7188	119	11.7647
T3G;G20T	128	39.0625	149	51.0067	96	40.625	163	52.1472	115	55.6522	96	51.0417	132	58.3333	131	42.7481	145	49.6552	114	49.1228
T3G;A21C	77	10.3896	85	12.9412	69	15.942	69	30.4348	58	12.069	68	14.7059	68	32.3529	87	11.4943	106	9.43396	48	16.6667
T3G;A21G	59	22.0339	79	39.2405	83	83.1325	95	88.4211	51	52.9412	75	86.6667	62	85.4839	85	68.2353	84	42.8571	76	84.2105
T3G;A21T	73	16.4384	78	15.3846	53	58.4906	71	15.493	66	18.1818	69	33.3333	73	57.5342	67	10.4478	67	14.9254	73	42.4658
T3G;C22A	108	33.3333	104	34.6154	73	54.7945	88	40.9091	108	38.8889	80	33.75	99	54.5455	103	22.3301	132	32.5758	107	40.1869
T3G;C22G	59	8.47458	65	9.23077	43	11.6279	78	7.69231	58	10.3448	60	3.33333	53	3.77358	66	12.1212	75	12	73	10.9589
T3G;C22T	102	9.80392	126	10.3175	75	12	125	11.2	72	12.5	76	7.89474	83	18.0723	82	6.09756	127	9.44882	101	8.91089
T3G;C23A	112	15.1786	104	23.0769	78	28.2051	97	32.9897	87	20.6897	98	19.3878	95	31.5789	97	13.4021	99	10.101	103	18.4466
T3G;C23G	95	50.5263	118	68.6441	85	51.7647	122	71.3115	96	70.8333	71	57.7465	83	62.6506	93	58.0645	128	62.5	85	65.8824
T3G;C23T	102	18.6275	95	10.5263	86	40.6977	109	11.0092	80	13.75	103	25.2427	90	32.2222	96	12.5	117	16.2393	82	32.9268
T3G;C24A	72	29.1667	114	42.9825	80	43.75	98	34.6939	89	28.0899	76	46.0526	82	50	86	40.6977	94	29.7872	97	37.1134
T3G;C24G	81	50.6173	119	55.4622	74	56.7568	100	62	73	63.0137	84	53.5714	71	66.1972	92	59.7826	106	52.8302	67	55.2239
T3G;C24T	105	71.4286	119	85.7143	87	81.6092	106	85.8491	100	83	89	82.0225	111	81.982	102	77.451	154	81.8182	131	89.313
T3G;G25A	122	7.37705	123	12.1951	113	21.2389	117	11.1111	115	8.69565	119	8.40336	113	7.07965	126	11.9048	139	10.7914	142	16.9014
T3G;G25C	123	9.7561	98	20.4082	83	32.5301	104	24.0385	102	15.6863	81	18.5185	122	48.3607	110	7.27273	138	10.8696	114	26.3158
T3G;G25T	112	24.1071	114	21.0526	91	46.1538	136	27.2059	97	25.7732	102	31.3725	121	60.3306	109	20.1835	146	24.6575	119	33.6134
T3G;T26A	105	34.2857	135	41.4815	181	90.6077	173	73.4104	135	46.6667	180	81.1111	225	90.6667	133	51.8797	159	41.5094	210	88.5714
T3G;T26C	75	26.6667	81	44.4444	145	93.1034	151	84.7682	76	46.0526	121	86.7769	164	93.2927	136	59.5588	97	30.9278	202	94.0594
T3G;T26G	97	25.7732	94	41.4894	163	90.7975	137	71.5328	89	48.3146	140	74.2857	185	92.973	110	57.2727	126	40.4762	186	91.9355
T3G;T27A	94	17.0213	124	29.0323	197	94.9239	151	68.8742	104	41.3462	155	80	187	95.1872	116	40.5172	142	30.9859	217	90.7834
T3G;T27C	99	46.4646	98	54.0816	130	91.5385	187	92.5134	98	68.3673	145	92.4138	185	94.0541	142	85.2113	132	61.3636	160	92.5
T3G;T27G	82	10.9756	81	20.9877	81	79.0123	77	22.0779	68	19.1176	91	38.4615	123	85.3659	78	12.8205	83	18.0723	138	63.7681
T3G;T28A	106	26.4151	103	32.0388	197	88.8325	160	57.5	101	32.6733	143	78.3217	189	94.709	124	40.3226	117	41.8803	209	88.5167
T3G;T28C	79	26.5823	69	24.6377	117	94.8718	109	69.7248	68	32.3529	104	81.7308	165	93.3333	96	35.4167	114	25.4386	164	82.9268
T3G;T28G	79	60.7595	88	56.8182	114	85.9649	95	61.0526	79	62.0253	74	79.7297	111	81.0811	70	48.5714	105	56.1905	111	82.8829
T3G;T29A	93	24.7312	75	22.6667	145	91.7241	144	59.7222	74	16.2162	147	71.4286	182	92.8571	96	31.25	113	22.1239	181	85.6354
T3G;T29C	119	67.2269	91	65.9341	152	94.0789	136	91.9118	102	82.3529	138	87.6812	144	94.4444	134	75.3731	122	72.9508	166	90.3614
T3G;T29G	75	17.3333	71	32.3944	130	76.9231	83	20.4819	62	8.06452	77	36.3636	134	74.6269	72	22.2222	85	17.6471	103	65.0485
T3G;C30A	90	7.77778	90	17.7778	125	79.2	107	36.4486	64	15.625	109	61.4679	132	82.5758	93	19.3548	113	12.3894	130	76.1538
T3G;C30G	62	17.7419	92	2.17391	118	72.8814	89	22.4719	84	16.6667	90	38.8889	136	75	82	21.9512	98	17.3469	125	67.2
T3G;C30T	93	17.2043	102	22.549	163	90.7975	162	61.7284	90	15.5556	138	79.7101	168	91.0714	109	34.8624	131	22.9008	182	86.8132
T3G;C31A	98	4.08163	95	13.6842	59	77.9661	76	35.5263	65	18.4615	78	57.6923	84	83.3333	90	20	109	10.0917	98	68.3673
T3G;C31G	74	17.5676	64	21.875	96	87.5	96	51.0417	56	17.8571	87	57.4713	120	86.6667	62	24.1935	81	32.0988	115	79.1304
T3G;C31T	97	15.4639	97	15.4639	114	82.4561	103	41.7476	84	17.8571	115	74.7826	120	90.8333	98	23.4694	109	16.5138	121	83.4711
T3G;C32A	105	29.5238	90	27.7778	149	89.9329	167	88.6228	112	36.6071	148	87.1622	183	94.5355	129	56.5891	115	38.2609	177	90.9605
T3G;C32G	67	46.2687	76	44.7368	88	87.5	127	79.5276	82	68.2927	82	90.2439	76	93.4211	120	77.5	117	60.6838	116	92.2414
T3G;C32T	112	14.2857	93	22.5806	112	87.5	157	81.5287	83	33.7349	134	84.3284	150	91.3333	100	50	113	25.6637	143	89.5105
T3G;T33A	107	31.7757	128	42.9688	183	90.1639	210	82.8571	99	47.4747	187	88.2353	192	93.2292	148	70.9459	136	39.7059	222	89.6396
T3G;T33C	88	23.8636	85	42.3529	116	85.3448	135	90.3704	68	61.7647	130	83.0769	123	92.6829	109	59.633	127	46.4567	155	89.0323
T3G;T33G	121	66.9421	130	73.8462	130	84.6154	167	71.8563	109	73.3945	102	77.451	142	88.0282	93	67.7419	141	71.6312	158	78.481
T3G;C34A	140	27.1429	126	38.8889	207	93.2367	186	86.0215	94	45.7447	202	87.1287	212	94.3396	157	61.7834	145	44.1379	226	93.3628
T3G;C34G	77	32.4675	73	45.2055	78	87.1795	80	81.25	70	51.4286	87	73.5632	95	83.1579	77	55.8442	110	50.9091	86	84.8837
T3G;C34T	125	29.6	122	31.9672	137	87.5912	182	84.6154	109	24.7706	164	82.3171	155	87.0968	159	52.2013	144	26.3889	188	90.4255
T3G;T35A	92	22.8261	90	30	112	95.5357	158	85.443	72	44.4444	120	85	163	92.638	127	59.8425	121	34.7107	170	90.5882
T3G;T35C	78	38.4615	84	48.8095	121	93.3884	155	83.871	84	57.1429	121	80.1653	125	94.4	100	68	119	52.9412	141	91.4894
T3G;T35G	75	30.6667	95	42.1053	150	90	115	84.3478	69	66.6667	109	82.5688	152	87.5	114	47.3684	99	38.3838	150	91.3333
T3G;T36A	84	25	100	20	86	88.3721	115	80.8696	75	41.3333	84	88.0952	100	84	108	57.4074	96	33.3333	129	89.9225
T3G;T36C	85	4.70588	77	9.09091	65	47.6923	71	33.8028	66	10.6061	65	36.9231	73	53.4247	76	19.7368	93	16.129	88	48.8636
[truncated: 21,223 more rows]

## Sheet: RepB %Cleaved
variant	0uM_G_Reads	0uM_G_PC	12500nM_G_Reads	12500nM_G_PC	12500uM_G_Reads	12500uM_G_PC	1250uM_G_Reads	1250uM_G_PC	125uM_G_Reads	125uM_G_PC	2500uM_G_Reads	2500uM_G_PC	25mM_G_Reads	25mM_G_PC	500uM_G_Reads	500uM_G_PC	50uM_G_Reads	50uM_G_PC	5mM_G_Reads	5mM_G_PC
Conc.	0	0	0	1.25e-05	0	0.0125	0	0.00125	0	0.000125	0	0.0025	0	0.025	0	0.0005	0	5e-05	0	0.005
WT	1557716	8.38182	1677759	8.78994	1611734	67.4387	2043655	21.568	1249742	10.8138	634020	35.2044	1543489	72.8117	1694976	13.7644	1974485	9.92492	1709869	49.627
T1A	20899	7.7085	22043	7.62147	17903	53.829	26157	15.8428	16546	9.67001	7763	28.7518	16806	61.3531	21545	10.6289	25530	9.48688	20909	40.5519
T1C	15590	14.8621	16764	16.6786	14833	81.7164	20550	40.9392	12634	18.9172	6645	62.167	14761	83.9239	17375	24.9784	19764	17.9265	15647	73.2345
T1G	19437	23.7382	22496	32.2457	19480	68.3316	24649	33.3442	15576	27.2149	7967	45.4751	17995	72.4924	21867	33.594	24965	29.4813	19507	53.7961
T2A	12327	14.0586	15096	14.6993	10453	85.6788	16267	49.6896	11640	19.3814	5100	67.8824	12117	86.4405	15398	27.9127	17716	18.2773	11877	79.2288
T2C	12631	11.1155	16262	14.3586	6972	69.5927	14810	26.5699	10575	14.0047	4224	46.9223	7956	76.6968	14820	18.3671	17655	14.1773	8309	55.9995
T2G	18076	15.9715	18871	17.9376	19235	80.4627	22872	36.2671	13438	18.8123	7461	57.3382	18924	81.4468	18655	22.6695	21164	18.7016	17214	65.9928
T3A	12054	11.9131	13985	13.872	5061	73.8194	8753	48.0635	8848	17.7441	2704	65.6435	5909	75.5119	11203	28.0639	15109	16.3942	4965	67.3716
T3C	8893	13.8199	12473	22.1438	4416	72.2373	8778	42.7888	6806	17.2495	2902	63.2667	5626	77.8351	10205	28.4664	12395	21.1456	4743	65.8233
T3G	14920	21.7292	16700	25.1198	14090	88.8928	17897	68.9278	11142	29.1869	5942	82.7163	14692	88.7898	15480	44.199	18331	27.8054	11901	85.2113
C4A	6109	18.972	7011	25.4029	2874	61.8998	3925	54.5223	3191	35.0987	1309	61.1154	3447	68.7845	3948	51.9757	5943	32.7949	2679	56.103
C4G	4682	33.4259	6142	39.0915	3456	62.6736	4628	63.3535	3065	48.646	1500	68.7333	4217	67.9393	4648	61.1661	5321	46.4762	3266	59.3693
C4T	11722	12.6173	13075	16.1071	5581	65.8484	8006	49.2131	7396	20.7004	2524	58.0428	5889	70.5043	8982	35.8495	13024	19.9555	5501	57.226
A5C	8284	17.2139	12100	25.8512	3735	61.5261	10008	32.2542	7237	22.5784	3173	54.2389	4738	70.515	10127	29.0017	12087	28.0301	5197	54.5892
A5G	13769	12.7533	15956	14.0135	8360	76.1244	15215	42.0112	11482	16.7741	4609	61.4016	9306	79.3359	15334	22.5251	18524	15.3962	10203	70.6263
A5T	3421	7.65858	3738	9.3633	925	43.1351	1323	35.1474	1426	17.1809	466	45.0644	1215	53.251	1381	26.8646	2891	14.5278	945	32.4868
G6A	13833	73.1945	20236	79.7687	15239	90.5178	19106	88.1713	11639	83.478	7032	89.7184	15956	89.634	19218	88.6877	20781	82.5514	13919	90.2004
G6C	15462	77.5126	20031	81.6734	17508	91.4039	20263	88.8121	12658	83.8758	7077	89.8262	15360	89.7331	19097	88.6684	21598	83.9754	15739	90.4124
G6T	16632	77.6876	23994	82.8582	19964	91.7051	23301	89.9275	13674	85.6297	8368	90.7744	19585	91.1514	23063	90.2311	24670	84.9615	17752	90.5194
C7A	24829	86.2701	31784	88.1827	31273	94.8294	34053	93.4015	19842	90.1875	12001	93.8505	28293	93.8289	31390	93.1252	34002	89.6683	28174	94.5091
C7G	16083	86.6567	22518	88.4537	20941	93.9544	23610	92.8759	13702	89.3957	8194	93.4098	19309	92.91	22673	93.0093	23006	89.6983	19065	93.6795
C7T	23185	30.4292	25651	31.9364	35745	93.0564	35626	69.5924	19319	35.8714	12602	84.7326	31065	92.0811	28120	46.2909	30500	33.1803	30873	89.2236
C8A	21401	40.7458	26419	46.7997	38540	95.4852	40886	90.0553	20145	62.8047	13613	92.4851	34289	94.1964	32594	76.9712	31354	55.5208	34283	94.595
C8G	19949	88.5157	25052	89.905	26870	96.2077	29838	95.3348	16959	93.2602	9847	95.3488	24426	95.251	26680	95.4273	27578	91.3373	24679	96.1587
C8T	20113	21.8863	23515	25.3838	36716	93.0739	34216	65.5454	17719	32.9251	12076	82.3783	31325	91.8563	25605	43.1361	27209	29.3543	31868	89.0172
G9A	26410	8.84513	27455	8.77436	26450	31.138	33959	10.124	21495	8.76018	10415	13.1925	25610	48.0281	28036	9.11328	32850	9.19026	29486	17.2421
G9C	21475	9.89523	23338	8.75825	21258	12.4612	28699	9.33482	18326	8.51795	8630	10.7764	20042	20.487	23989	8.32048	28959	8.87116	24049	9.65529
G9T	19122	8.52944	20662	6.79508	12958	9.70829	23632	7.01168	17063	8.22833	7010	7.50357	10396	18.6129	20573	5.10378	26540	8.7792	18227	6.26543
G10A	26602	11.0255	27930	10.9023	35889	63.2088	35578	18.5452	21145	11.9035	11164	27.1498	33624	72.0616	28603	13.6839	33012	11.2686	32186	37.2305
G10C	14520	13.595	16704	12.488	17287	48.6551	19264	16.0195	13446	11.8994	6101	20.0295	19496	61.2177	16634	13.4844	20597	12.7057	16183	27.98
G10T	20402	7.6316	22889	7.06453	17917	21.7391	27291	8.24081	17976	8.68936	8019	11.3605	16793	36.3783	22995	6.12307	28221	9.50002	21624	14.5764
A11C	8351	16.8842	9546	14.603	8726	30.8503	11687	16.4884	9148	11.3795	3654	20.1423	9372	42.2429	10014	14.3499	14245	12.1938	9446	24.2431
A11G	10974	20.6397	13842	24.4184	22504	91.9525	22058	76.1084	10828	40.7185	7821	85.1937	18696	90.3081	16789	57.9606	16096	31.4488	19962	88.949
A11T	14492	7.28678	16668	6.35949	11278	17.3169	18935	8.39715	12753	8.03732	5470	10.841	9715	26.7319	16374	5.83242	20169	8.65685	14584	13.7479
A12C	12683	10.2972	14157	9.60656	12042	15.911	16779	10.3582	11446	9.48803	5025	11.0249	11791	23.06	14328	8.29146	18406	9.4969	13651	12.402
A12G	13829	9.67532	15298	10.6485	12627	61.6219	18234	26.659	11546	13.1301	5594	40.7758	12200	69.8934	15420	18.4047	17583	11.6362	14798	51.2434
A12T	19863	9.80718	20859	8.71087	17089	7.05717	24482	8.76971	16985	8.02473	7152	9.13031	15750	12.2667	20372	6.44021	27695	8.51056	19881	6.54394
G13A	14879	26.7289	16496	36.2936	11644	79.8093	14366	80.245	8655	61.6984	4776	82.9774	11934	80.3838	12498	77.0603	15834	52.3557	10442	77.466
G13C	15189	6.91948	16622	8.85573	7478	52.3402	15541	22.8492	11091	10.4319	4242	35.9029	7568	61.6543	14703	17.6155	18546	9.80265	8702	37.3248
G13T	16807	10.1267	18519	13.0731	8281	65.4752	13594	44.9022	11160	19.319	4083	60.7641	8464	68.8327	14048	32.9228	19634	17.3067	8210	55.7978
C14A	13347	14.2504	15405	15.3262	10969	7.84939	15815	13.5188	11202	18.2646	4892	12.1014	11540	13.2842	12821	12.3157	17912	20.1206	12722	8.87439
C14G	12334	11.4561	14262	12.1512	12118	8.49975	15319	10.2683	10496	14.5293	4905	10.9888	11225	12.6503	12611	10.4512	16477	15.3244	12917	7.76496
C14T	16482	5.52117	18818	6.78606	15822	9.08229	21253	5.62744	13343	6.28045	6642	7.63324	13652	17.8655	18117	5.71287	21289	7.66593	17349	5.20491
G15A	12940	15.3709	15404	12.2566	11061	10.1437	17249	12.5051	18214	9.89898	5133	11.4943	11977	15.3878	14789	9.08107	28059	9.30539	12707	9.40427
G15C	14998	7.80771	17225	8.91727	14459	20.4094	20632	9.63552	12748	7.54628	6274	13.3886	12378	34.012	17201	9.71455	20104	8.49582	16529	11.501
G15T	16728	6.55787	19839	7.21307	16329	13.424	23413	6.88506	14017	6.81316	7039	8.82228	14067	25.5776	20137	6.57496	23097	7.06585	18884	7.53548
G16A	5903	3.70998	7690	4.21326	6839	7.35488	8017	5.37608	4179	4.35511	2547	6.16411	7347	11.9641	6679	4.41683	7246	4.73365	7528	4.99469
G16C	9504	13.4049	11595	16.4899	10339	21.0175	12110	14.8803	7100	12.9296	3803	18.7747	10273	26.9834	9975	17.8446	11501	15.5117	11044	14.7048
G16T	9384	6.14876	11041	7.29101	10083	10.5326	12197	7.62483	6688	6.9378	3894	9.78428	9481	19.1541	9917	7.5426	11229	7.36486	10910	6.56279
G17A	17905	11.0416	20734	12.9546	16585	23.6117	23627	13.4507	14430	9.307	7040	17.5426	15418	41.5424	19414	13.4491	22552	13.1119	18385	12.5483
G17C	15794	34.7537	18764	37.3055	17847	60.0717	20771	40.3495	12871	33.3463	6796	48.6757	15784	66.5104	17160	39.3182	20358	38.9282	16790	44.455
G17T	8578	11.2963	10701	13.1763	8765	30.5191	11216	16.0574	6298	11.5751	3469	24.0703	9409	46.2642	9448	15.2625	10895	14.86	8905	18.63
A18C	13835	10.4156	15021	9.53998	13326	12.2167	18458	10.3261	11768	9.68729	5462	12.0103	12053	17.1161	15389	10.0721	18585	9.29244	15424	10.2892
A18G	16940	10.7556	18082	10.5575	17235	12.6777	21762	10.8722	13235	9.70155	6499	12.9558	15390	16.8031	18125	10.7255	20743	10.0178	18488	10.9909
A18T	10458	10.0306	8562	10.3714	9287	10.7893	11000	9.38182	6817	9.53499	3515	10.697	8127	13.609	9811	9.89705	10748	8.99702	10144	9.65103
C19A	15722	16.5819	18625	16.6389	17287	30.6589	21671	16.9766	13277	15.8771	6774	19.7815	17002	38.6131	17936	16.5366	20962	17.1071	18266	19.2872
C19G	10545	15.5619	12417	13.9647	9737	21.0332	14084	15.088	9043	13.0709	4257	17.1247	9228	26.6688	11826	15.4913	14848	13.3755	11132	15.5138
C19T	12042	7.24132	13769	7.40795	11244	15.4838	15210	8.56016	9154	6.55451	4810	10.1871	9970	22.9789	12487	8.24858	14498	7.89764	12985	8.81017
G20A	20922	24.0943	23443	25.8414	23891	51.2285	27459	30.8096	16871	23.9701	8888	37.3875	21544	60.7362	22637	29.5666	26214	27.1153	23224	35.2394
G20C	8166	18.8097	10162	17.8705	10724	36.2365	11299	22.1967	6231	18.8573	3572	24.804	11297	42.0289	9293	18.6592	10345	19.9613	10372	24.7397
G20T	21444	21.8196	23134	22.1708	23543	38.5635	28684	23.6125	17303	20.7074	8820	26.5079	21146	46.0465	23128	22.462	26890	22.2722	24305	26.1181
A21C	17185	9.9389	17566	9.97951	15241	10.2421	21597	10.1542	13277	9.50516	6249	10.8817	14240	15.1053	17301	9.49078	21431	9.93421	17418	9.51889
A21G	16419	14.264	17777	15.6438	26017	85.1213	24299	41.9441	13593	20.6871	8379	59.1001	22141	86.0892	19234	28.3664	21383	17.4578	22964	71.5816
A21T	17829	10.7634	17943	10.1098	17645	16.0385	22791	10.8376	13880	9.45245	6944	12.86	15929	21.577	18688	10.579	22143	9.60574	19293	12.3724
C22A	19448	10.7363	21984	11.2172	20645	26.1468	25727	12.8192	15991	10.0369	8080	16.0025	20280	37.1055	21222	11.865	24940	11.5678	21840	14.3223
C22G	9843	7.94473	11483	7.59383	9819	9.73623	13018	7.58181	8076	6.57504	4092	8.87097	9319	14.5402	11451	6.73304	12673	8.13541	11347	6.80356
C22T	7311	14.3482	9394	12.5825	8049	24.4999	10004	14.7041	5920	11.9257	3285	16.895	8860	30.1467	8550	13.462	9720	14.8354	8359	14.7266
C23A	11523	4.6776	14738	4.93961	12661	6.27123	16232	4.64515	9489	4.4051	5076	5.77226	12383	10.1995	13891	4.49212	15961	5.16885	13569	4.25971
C23G	3205	16.6303	4206	21.0176	3873	13.9685	3920	20.4082	2334	18.4662	1350	20.1481	4232	23.1096	3657	20.1258	3883	21.504	3701	12.6452
C23T	11507	5.90945	15316	6.02638	12050	9.90871	16439	6.08918	9970	5.67703	5208	8.14132	12610	13.8462	14173	5.51048	16261	6.16813	13411	6.4201
C24A	14763	10.8785	17975	14.5702	15046	13.2527	19429	11.6012	11812	10.4047	6173	12.7977	14473	21.2395	16269	12.3302	19156	13.7711	15981	8.70409
C24G	17198	22.2119	18992	22.7201	17647	32.0508	22121	23.8868	13658	19.8272	6860	26.9971	16373	41.147	18781	22.5387	21536	22.9569	18781	21.3993
C24T	16650	21.4294	19408	22.3362	19279	48.0471	22007	25.8872	13126	19.8233	7346	31.364	19028	58.2247	18424	24.3921	21577	23.0709	18462	29.4822
G25A	14408	5.67046	18313	4.66335	13299	6.73735	19953	5.0619	13208	8.0103	6125	5.48571	12007	13.5338	17865	3.72236	21226	7.35419	16305	4.32383
G25C	21523	11.3878	22840	11.331	20182	13.3535	27010	11.7142	18390	9.83687	8400	12.9524	19501	21.0143	22330	10.1299	28944	9.96752	21891	10.8995
G25T	18985	9.98683	21743	9.41912	17781	12.7158	24845	9.193	17084	10.302	7471	9.55695	16052	24.5701	21452	8.18106	26057	10.6612	20164	8.52013
T26A	23756	11.4245	26506	11.4691	34881	64.5853	33109	19.3422	19369	11.6681	10487	28.7308	30644	69.4198	26144	13.9305	29917	11.8695	30600	40.2843
T26C	15631	12.9358	17238	12.9945	24285	87.2555	22156	35.8503	13127	13.7884	7666	60.9836	19847	85.6704	17413	18.3828	20382	12.7564	20776	75.6065
T26G	19031	11.8018	20649	12.2379	25684	57.456	25976	17.2544	15191	11.7965	7924	25.9213	22757	62.9477	20653	13.6493	23690	12.1317	23326	34.8538
T27A	22523	10.9088	24492	10.0523	31337	61.863	29621	17.0116	17380	10.6387	9258	25.5239	27839	66.3206	23718	12.9522	27736	10.8884	27787	37.4996
T27C	14666	13.7324	17535	14.2458	27089	86.692	22920	42.4782	12278	19.2132	8001	62.8296	22670	85.0816	17412	26.2061	19210	16.658	23253	76.6224
T27G	18418	9.7459	19942	9.2769	19629	20.0418	23961	9.77839	14825	8.71501	7045	11.8098	18607	23.604	19745	9.28843	23085	8.7676	20694	13.0569
T28A	22618	10.2485	24704	10.0348	31028	59.3657	29373	15.2657	17331	9.75708	9223	22.9752	27908	65.4794	23524	11.9325	27028	10.3855	27012	33.8775
T28C	16482	9.63475	18716	9.17397	21698	52.0002	22418	13.6051	13723	9.5023	6978	18.8306	19838	56.5632	17891	10.5472	20674	9.56757	19865	29.5495
T28G	16939	11.1459	19549	10.9571	17856	23.2527	22834	11.7237	13854	10.5962	7023	14.3671	16416	26.6447	18522	11.2785	22057	11.3977	18857	14.8062
T29A	21088	10.1954	22709	9.72302	27551	54.1432	27736	14.0611	16791	10.2853	8688	20.0161	24979	60.5629	22688	11.0543	26119	10.2531	25273	29.5572
T29C	15339	19.1408	17014	21.4823	28483	88.0701	25686	59.4682	13099	33.1934	8927	72.7008	23286	86.7173	19252	45.4083	20177	27.2488	24726	81.3031
T29G	17856	9.22939	19374	8.23784	17903	21.2311	23402	9.75985	13868	8.14104	7107	12.2274	17307	23.6667	18451	8.74207	22360	8.29606	19535	13.0893
C30A	18593	9.76712	21118	8.99706	19927	41.5216	24125	11.0549	15075	8.57048	7333	15.9007	19677	52.5029	19423	8.92756	23529	9.68592	20778	21.9944
C30G	14012	7.17242	16659	6.60904	12987	14.9919	19359	6.53959	12872	7.21722	5962	8.50386	13107	23.7125	16028	5.56526	20334	7.89318	14746	9.81283
C30T	21187	10.7283	22241	10.5616	29179	64.2311	28123	17.779	16759	10.9374	8803	26.5023	25207	70.0837	22852	12.9748	26150	10.9522	26684	40.3613
C31A	16017	8.4223	18189	7.22415	10308	24.4664	20828	7.28346	14396	7.85635	5870	9.91482	9932	37.5453	17132	5.44011	21942	8.75034	14223	12.761
C31G	14443	7.70616	16894	7.36948	15653	49.2877	19282	12.2342	11826	8.44749	6129	18.9101	16787	60.809	15456	8.87681	18130	8.4225	16852	30.1092
C31T	17776	9.5297	19462	9.76261	20026	59.5076	23593	13.8304	14603	9.38848	7218	22.7625	19525	67.3752	18859	10.2975	22779	10.0531	19642	33.1025
C32A	18101	10.8392	19796	11.5124	26804	83.3682	24652	26.2859	15294	11.9001	8394	48.5823	22598	83.2552	19510	14.3465	23008	11.5395	23114	66.5571
C32G	12224	17.0648	13982	17.0147	8880	85.2703	15203	57.4952	10019	21.7088	4740	72.1308	10366	87.1214	13283	33.0498	15999	19.4512	11015	83.2955
C32T	18547	10.9398	18892	12.8149	27490	83.4704	25382	26.306	15837	12.2309	8618	47.8765	23909	84.3532	20818	13.9975	24825	11.3192	24668	65.1005
T33A	20376	12.9417	22657	13.2056	37302	83.5344	29323	29.8094	17000	15.0941	10079	48.864	31539	85.0851	23582	19.4513	26245	14.1894	30395	65.8135
T33C	20063	13.2333	21300	14.1362	32302	78.6577	28678	34.1307	15903	17.5313	9280	48.6961	29092	81.7441	21849	24.262	24394	16.2089	27867	61.6679
T33G	16568	15.542	19006	15.2952	18482	30.9436	22168	17.8861	13541	14.674	6761	20.7218	16954	33.8858	17492	17.225	20940	16.447	19010	21.8306
C34A	16474	12.286	18063	12.5394	28691	84.3156	23585	29.1202	13408	13.9021	7787	46.7189	23515	84.9585	18435	18.4378	20747	13.0477	23566	66.0273
C34G	20680	14.647	21902	14.7658	38403	86.1079	30638	39.3955	16548	19.5854	10106	55.1257	32441	86.7698	23461	26.6783	24851	17.0134	29959	70.0157
C34T	25641	11.583	28331	12.1139	39403	81.91	34461	27.6428	20300	13.3842	11301	44.8633	32163	83.8634	25769	16.9157	30750	12.2341	34647	62.9001
T35A	20009	12.6143	19624	13.5243	34117	83.1052	28561	31.1019	16525	15.1831	9597	48.8903	29311	83.9889	22968	20.4937	25452	13.9085	28901	64.0151
T35C	17203	12.7071	16932	14.7295	34192	85.8885	26629	37.8798	13744	17.0838	8920	55.583	29086	86.3061	19180	24.3848	21468	14.9385	26872	70.2032
T35G	16846	10.4238	18639	10.5263	26224	71.8693	23435	22.9528	13341	11.2061	7616	36.4496	23063	71.89	17223	15.2122	20286	11.2886	22314	51.3758
T36A	16828	11.1303	17524	12.8338	24602	78.7741	24075	29.2918	13577	14.1637	7639	46.7993	22516	81.9462	18677	19.698	21306	13.3155	22570	61.276
T36C	12797	5.86075	14951	5.95947	12720	27.3428	16826	11.0187	10634	7.32556	5105	16.4545	11716	36.9239	13649	8.92373	16587	7.18032	13946	18.3207
T36G	15813	16.2525	17546	17.6336	29093	89.702	27127	68.5479	12956	26.2272	9108	79.3698	25105	89.2531	20006	48.4005	19527	20.5357	24232	83.7405
T37A	15955	10.3416	17758	10.5586	19883	75.3407	22767	27.6541	13336	12.7175	7288	44.3606	20119	81.1521	17914	17.5617	20584	12.4611	20680	60.1402
T37C	15105	14.2734	17255	15.242	23525	74.865	20945	27.0757	12122	15.4925	6889	40.7316	21151	79.5329	16673	19.7325	19095	16.1561	19813	52.5211
T37G	17852	11.0912	19837	11.6701	32230	89.9504	30134	60.4765	14376	18.0648	10240	77.7148	28995	89.7948	21367	35.7935	22183	14.2046	27507	82.1027
C38A	13960	10.394	15714	10.5256	16539	74.2911	19776	25.3236	11856	12.8458	6349	42.4949	16265	78.5613	15724	16.4716	18122	11.864	17926	57.213
C38G	15936	9.66993	18103	9.85472	25934	79.4247	23525	29.509	13718	12.8882	7993	47.3915	23908	81.6421	18187	18.1723	20540	11.4508	23212	62.8425
C38T	12837	10.6645	14390	10.8061	14006	72.0049	17403	26.0645	10421	12.7243	5684	42.734	13619	78.5153	14231	15.5295	16551	12.3074	15883	58.7232
A39C	19247	14.0386	21575	14.299	28187	80.4697	28199	37.3134	16012	18.7297	9018	52.4728	24726	82.7752	22463	25.562	25090	16.5923	26028	66.1787
A39G	21051	12.3462	23163	13.051	28558	75.6881	29247	26.748	17002	14.563	9395	42.1181	25028	77.9087	23137	17.6816	26383	13.6831	26160	58.1957
A39T	18983	9.72449	21024	9.69844	25369	69.8254	25326	20.631	15547	10.7223	7958	32.9731	21442	72.7684	20748	14.2761	23937	10.7198	23095	47.0968
T40A	19065	10.2177	21012	10.513	25838	75.656	26970	26.2143	16289	12.2168	8757	42.2519	24281	79.4613	21656	16.9099	24914	11.9892	24744	57.9696
T40C	16886	10.1327	18803	10.5887	23778	79.6871	23590	33.5184	14023	13.2782	7743	50.9234	20749	82.11	18523	19.4245	21452	12.1853	20645	62.4364
T40G	16337	9.73863	18421	9.2666	20591	67.4907	22798	18.9622	13913	9.75347	7079	30.8942	20089	70.9991	17737	12.1836	21255	10.3505	20774	49.7545
T41A	18271	10.6508	19970	11.6375	31140	81.9493	26798	32.898	14896	14.9168	8822	49.5693	27766	84.5134	20509	21.4589	22270	12.9457	26478	64.1061
T41C	16346	11.4829	17636	12.1173	23449	77.0779	23042	28.3569	13518	14.5584	7701	44.228	20785	80.0241	18410	19.2504	21061	13.2092	21245	57.783
T41G	16175	8.45131	18348	7.79376	18934	47.8451	21538	11.2777	13518	7.50111	6746	17.566	18458	51.2298	17277	8.83255	20998	8.61034	19091	28.8775
G42A	19002	10.7936	20209	11.1633	24930	74.4565	26240	25.5678	15600	13.7051	8680	39.2972	23791	80.1101	20988	16.1711	24209	12.1773	24590	55.486
G42C	19665	10.9179	20279	11.7856	28499	78.2764	27693	28.9676	15986	14.6441	9007	45.3425	24718	80.3665	21923	18.638	24610	13.2141	25361	59.3037
G42T	23588	11.0438	25978	11.8793	28666	77.5727	32093	28.7072	19182	14.6231	10277	47.1052	27172	81.849	25898	18.3605	29502	13.4194	28072	60.5372
C43A	24391	8.96642	27008	8.90847	30501	52.7884	32064	13.2735	18943	8.71034	9783	20.0552	29144	57.6551	25489	10.122	29077	8.7595	28939	29.9146
C43G	17883	8.12503	21208	7.1341	17514	20.6406	23699	8.04675	14704	7.14771	7301	9.39597	16886	26.5782	19585	7.67424	23168	7.68733	19758	10.74
C43T	20099	10.0154	22384	10.2305	24130	76.3448	27623	27.0246	16445	13.5239	8695	44.8994	23045	79.5878	22015	17.479	25990	12.6741	23184	58.6525
G44A	22456	7.69505	24890	7.40056	22385	14.5187	30079	8.99963	18384	7.79482	8752	11.2431	20076	25.2241	24149	7.47857	29056	8.19452	25338	9.61402
G44C	20690	13.5041	21320	14.2542	28593	72.1855	28923	32.4793	15577	15.9787	9524	46.5246	26742	80.6073	23081	22.0744	24516	15.6143	27293	54.3583
G44T	22877	7.89002	23664	8.56998	24684	50.2957	30103	18.4732	17681	9.97681	9215	27.7048	24150	64.9317	24375	13.2349	27096	9.52539	26526	32.9865
C45A	21145	7.28305	23242	7.03898	19953	11.7677	27555	7.85338	16778	6.26416	8208	8.95468	19359	17.191	21598	7.31086	25672	7.30368	23157	8.58056
C45G	15976	5.57712	18388	5.96041	15075	21.9038	21481	7.51362	13396	6.12123	6550	10.7176	14862	35.7758	16600	6.27711	20607	6.65308	17322	11.367
C45T	18993	6.28653	21454	7.31332	18545	64.0119	25081	28.0132	15277	10.1656	8062	41.2925	19528	73.7864	20149	18.8595	23788	9.736	18330	44.8936
G46A	17513	30.6572	21229	41.7118	20082	88.7511	24648	88.5995	13692	67.229	8771	90.2976	20464	88.9904	21037	84.6651	23175	58.11	17339	86.9658
G46C	25144	12.1898	26597	12.0728	31215	52.0359	32672	17.1462	19555	11.7719	10327	24.0728	28541	63.8135	27389	13.5237	30644	12.11	29511	30.7411
G46T	21110	32.7807	23585	37.0744	26402	66.7677	28378	42.3814	13779	28.8192	9238	46.536	24015	69.061	24465	42.4688	24018	34.3617	24329	50.5528
G47A	24786	33.8538	27894	32.9641	40519	77.5192	35130	46.3706	19350	34.8165	11542	55.7529	36894	84.1492	28039	42.8439	30019	35.9639	32294	58.7385
G47C	22226	21.9248	22501	23.0879	28402	50.8344	28233	26.469	16532	20.9896	9103	31.6709	26047	61.6616	24264	24.6991	27341	21.85	26418	32.898
G47T	26330	24.7588	27454	25.7412	34294	56.7213	34332	31.0527	20001	25.0937	10647	35.7847	32324	67.9155	28447	29.5216	31358	26.2517	30901	39.18
G48A	23303	14.5904	26731	14.2756	25473	31.398	30839	18.1102	18148	13.8032	9430	21.3362	24332	38.1144	25234	16.8661	28686	15.5372	26107	21.094
G48C	19348	27.9099	22100	32.1312	20391	39.1398	25942	30.7571	15554	30.8024	8010	34.4569	19445	52.0288	22458	33.9122	25279	31.1286	20805	29.8246
G48T	26969	23.4566	29604	24.8987	30770	45.4501	35655	27.9512	20641	23.4679	10938	32.2362	29203	56.0867	29301	26.8796	33708	24.9199	29591	30.7053
G49A	25620	10.0312	27920	10.0143	25488	20.7313	32006	11.3572	19404	9.26613	9824	12.4186	24405	29.3014	27068	10.4773	30929	10.4659	27336	12.8951
G49C	19732	7.53091	21736	7.6187	19642	9.80043	25991	7.79885	16873	9.00255	7741	8.48728	17255	18.8235	21989	7.39006	26160	9.24694	22509	6.65067
G49T	23448	9.55732	25457	8.75987	23337	7.20315	30790	8.86976	19662	8.60035	9036	8.62107	20890	11.3356	25121	7.81418	30872	9.29645	26103	7.15243
A50C	16858	9.85882	18259	9.69933	16316	11.5163	22195	9.33544	14298	9.50483	6740	10.089	14796	17.4101	19092	8.62141	22988	9.53976	18442	8.95781
A50G	15042	12.372	16783	12.6795	14686	38.5878	19585	16.2012	12178	11.4469	6133	21.8001	14368	57.1339	16164	13.9136	19149	13.6404	16081	22.3618
A50T	19635	9.25388	20534	9.9737	18042	9.52777	25944	9.39331	15887	8.64229	7716	10.6013	16410	12.468	20679	9.7732	25803	9.09972	20968	9.60988
C51A	18359	12.261	20931	13.0906	19330	31.2002	24598	13.7897	14996	11.6698	7483	17.2792	18261	50.167	20314	12.4938	23722	13.047	20607	16.4944
C51G	17449	13.0036	18562	13.1882	17718	21.2157	23058	14.4288	14158	12.0356	7116	15.5284	15881	31.3519	18772	13.7119	21784	13.542	19717	14.2669
C51T	15861	16.4618	17795	17.1565	16668	48.5481	21218	20.0867	13134	15.3419	6698	25.53	16517	65.4598	17726	18.3854	20260	18.7562	17608	26.1642
G52A	15459	17.265	17774	20.5131	15615	48.082	20555	26.0326	12788	18.0873	6485	34.1095	15603	62.943	17090	24.7396	19777	20.5188	16313	30.8956
G52C	18020	13.4184	21425	16.3921	17951	36.5272	22916	18.4631	13329	13.2418	7260	25.8402	17532	53.0972	18854	17.54	21496	16.4914	19520	21.624
G52T	16100	18.1118	18244	21.1467	15836	30.5506	21128	21.9566	12662	17.6433	6506	24.3929	15554	43.3072	17448	21.4867	20323	20.8335	17648	19.7359
A53C	19134	9.29759	20064	9.36503	18411	13.9971	24588	10.4685	14903	8.9378	7273	11.8521	17059	20.605	20408	9.58938	23597	9.60715	20585	10.8769
A53G	16779	9.68472	18680	8.90257	18653	40.1544	22528	11.6788	13755	9.0149	6898	17.1064	17835	45.2761	18348	9.45062	21419	9.90242	19252	23.5248
A53T	19061	9.67945	19720	9.0568	18146	9.3905	24638	9.22965	14717	8.69063	7330	9.1678	17105	10.6986	20575	9.0401	24050	8.57796	20497	9.20135
C54A	22738	22.3766	24010	22.3282	25871	36.1293	29347	24.2751	17351	21.8777	8847	25.6923	23510	43.8962	24963	23.4667	27610	22.7599	25711	25.4755
C54G	20255	11.1034	22179	10.0906	20437	12.8688	24411	10.909	14918	9.88738	8023	10.7316	18873	16.664	22501	10.8573	25028	10.2885	23013	10.1291
C54T	22502	9.4836	22991	9.34714	22262	9.94969	28030	9.34356	17178	8.86599	8711	9.60854	20379	12.1792	24344	8.93444	27898	8.78558	25415	8.73893
C55A	17353	13.8477	19479	13.8405	20775	39.2972	22771	20.4295	13251	13.7273	7215	25.5579	19706	52.1821	18299	17.0665	20986	15.8963	19560	23.5174
C55G	8605	44.7531	10977	47.1622	12094	55.7218	12646	49.5967	6679	47.043	4047	54.0153	12539	61.7115	10717	51.6842	11696	52.0691	10598	44.0555
C55T	18496	11.6241	19803	11.17	25920	69.0085	25034	28.4373	14177	14.4177	8073	40.716	24181	75.58	20275	19.9112	22178	13.2158	23009	47.1511
C56A	19897	9.63964	21518	9.84292	22890	40.0612	25848	14.2642	15182	9.43881	7855	19.478	23008	55.5633	21127	12.032	23767	10.7923	22083	21.1701
C56G	13306	5.89959	14967	6.21367	13345	23.3795	16689	8.01726	10389	5.4577	5308	10.324	12565	43.9713	13637	6.97367	16405	6.42487	14570	9.97941
C56T	21256	10.2371	22192	9.98107	25672	43.6974	27261	14.816	15908	9.93211	8293	21.4036	25272	58.9664	22451	11.9906	25277	9.98536	24316	25.5675
T57A	18184	7.38011	18642	7.71913	18886	34.7506	23619	15.5934	14286	8.04284	7211	21.3285	18049	50.1745	19478	10.4374	22130	8.41392	20994	23.1304
T57C	18921	10.01	20075	10.1818	13492	79.9066	21863	31.3498	14832	11.0437	6413	57.8668	13267	80.9829	19455	14.9319	23220	10.379	13002	65.8437
T57G	15532	8.02215	17980	7.82536	15409	25.6409	20899	12.168	12893	8.22927	6262	14.7078	13382	40.7338	17198	9.21037	20105	9.19672	16922	14.5787
G58A	17092	21.8874	19365	22.4632	33664	87.3396	28444	58.1212	12707	28.7637	10487	74.4159	30933	88.1227	21392	42.2681	21078	26.6629	26986	77.2215
G58C	16197	16.0647	17860	16.8141	23584	80.6309	23865	44.5967	12156	21.0184	7872	60.874	22241	85.9179	18484	31.4488	19575	19.9234	20246	62.7581
G58T	22922	14.7893	24494	13.7462	33793	67.1737	31506	28.0613	17978	15.6858	10337	41.5111	31018	76.9005	25936	20.6431	27721	15.7318	29658	48.1995
C59A	17211	21.0679	21015	22.8503	30866	88.3853	24521	47.5185	12659	24.7887	8993	67.4191	26973	89.1225	19584	37.2447	20733	26.3686	24759	77.4022
C59G	11029	9.81957	14089	12.0378	10447	70.3934	14056	36.3048	8187	12.7519	4633	59.2057	12044	75.2242	12252	24.1022	13803	13.4464	10141	59.8067
C59T	19536	17.8593	22163	18.6933	36437	89.077	29786	51.5746	15017	24.5988	10487	68.9139	30199	89.9003	23161	37.8136	23851	23.6007	29516	78.7674
A60C	18126	10.4877	20213	10.4636	24422	65.1503	24719	21.9224	14841	12.014	7900	33.0759	23212	72.7942	20441	14.7302	23415	11.6464	22807	44.0435
A60G	15969	10.702	17841	10.9635	18052	75.7146	21005	31.0545	13059	14.9169	6947	49.2875	16654	77.675	17018	20.5136	20917	12.6787	16770	60.805
A60T	19537	10.5185	21846	9.23739	22485	27.8897	25535	10.9418	15706	8.69731	7858	13.4513	19865	31.4875	21301	9.71316	25091	9.07497	22575	16.979
G61A	20299	10.8823	22583	13.2755	23501	78.5796	28372	41.3929	16610	20.7526	9079	57.8368	23004	81.2685	23377	30.7781	25972	18.0733	22658	66.3077
G61C	20764	11.2888	23231	12.4575	36454	83.3022	32113	42.3847	17579	21.2185	10658	59.833	30507	83.0334	24420	30.2416	26291	17.1732	31061	71.1471
G61T	24404	13.1331	26494	15.328	39180	85.0689	35867	41.2357	20258	21.547	12211	58.7994	35160	86.8743	28257	27.9612	30868	19.3242	34522	71.6992
A62C	15304	15.8325	17246	17.1924	29807	91.8408	26509	64.6158	13492	30.9146	9189	78.6919	25084	91.07	19512	46.7353	20245	22.86	25433	85.7115
A62G	15508	18.9966	17469	20.6652	21644	78.7378	22203	45.0705	12319	28.2003	7541	58.719	19304	81.8949	18145	37.3106	20153	25.6537	19840	65.6099
A62T	17741	9.83034	19361	10.2577	24739	63.1473	24228	22.2759	14450	13.0588	7529	32.0627	21560	68.2792	19508	16.342	22516	12.3201	21444	41.0185
G63A	24915	9.83745	26820	9.93661	33676	60.2269	33305	14.6915	20182	9.6373	10332	20.7414	28462	65.0235	27028	11.9099	31427	9.84822	30546	33.1795
G63C	22925	10.0502	24725	9.45197	32637	66.0079	30352	15.0929	18061	10.1822	9549	26.4635	28010	68.522	24529	11.8676	28736	9.57336	28373	39.9288
G63T	26332	10.6866	28604	9.37281	57515	89.4045	36494	33.7206	19688	12.6067	13402	52.8205	47166	89.9228	30121	17.6687	33623	10.6713	40997	71.3101
A64C	16657	10.1819	17019	10.0652	23929	65.9618	22087	17.2273	12989	9.30018	6923	26.5925	21628	70.8341	18327	11.5676	20359	9.74999	20864	39.7143
A64G	14728	15.8066	16443	17.4238	24911	89.7074	22834	52.3999	12285	25.6899	8068	69.819	22041	90.554	17746	36.3293	18660	21.94	22430	80.8114
A64T	19081	10.3506	20310	10.3397	31165	82.2076	26284	25.9207	14959	12.7749	8657	43.4908	26376	84.285	21332	17.4245	23579	11.4381	26004	61.3329
G65A	23289	15.5868	26274	17.5002	46414	96.6626	46504	89.6697	21103	40.0275	16331	94.4461	40227	96.0971	34749	67.2652	31395	27.8388	40605	95.2124
G65C	11401	9.16586	12901	10.7434	20240	94.4219	23917	89.2712	9918	40.7945	8180	92.824	21392	94.4979	19638	78.399	14480	21.2914	19547	92.6741
G65T	15194	19.2181	18644	24.5655	35023	96.5765	36086	93.7455	16181	69.9648	12792	95.247	31604	95.9087	32163	88.7759	23664	46.5559	31222	95.3719
G66A	13875	32.5838	17869	47.7587	16322	94.9271	20205	92.1257	11374	81.5368	7407	92.9661	18736	94.636	19863	91.5471	19754	70.9223	14956	92.3041
G66C	16024	26.4666	18799	40.4436	27858	96.8196	33074	95.3287	17222	87.8586	10860	95.7643	25316	96.1566	28300	94.5724	24898	67.9814	26290	95.9642
G66T	15817	68.616	21713	78.6349	18265	95.6365	22787	94.3828	12747	90.2722	8217	94.84	19662	95.5701	22572	94.697	22469	87.752	16468	94.8445
C67A	4829	33.216	6131	39.1127	2852	78.5414	3729	75.9185	2530	60.3557	1298	77.8891	3662	80.0382	3678	74.1164	5046	54.9148	2589	75.1642
C67G	4419	7.98823	5603	7.79939	1757	57.3136	2746	44.7924	2640	14.3182	907	57.7729	2250	61.4222	3295	29.044	4944	12.9652	1564	53.0691
C67T	7501	16.3178	9589	19.4911	2975	75.6975	4763	66.9746	4398	30.4229	1717	71.5201	4094	76.9419	5587	50.4027	9002	25.2944	2953	69.9289
T68A	4938	37.4038	6415	48.0748	3205	84.337	4257	79.7745	2685	67.8585	1462	82.6265	4095	85.812	4324	80.5273	5450	63.945	2950	80.0678
T68C	6997	24.3676	8088	30.1558	4427	79.5121	6236	65.4747	4231	46.3011	2181	72.1229	5132	81.8784	6016	61.8185	7628	40.8364	4676	72.4123
T68G	4487	6.44083	5708	6.76244	1530	52.8105	3005	30.9151	2937	9.32925	815	45.6442	2081	53.4839	3786	18.5684	5251	8.83641	1664	45.3726
G69A	14523	71.3145	19648	77.1682	17814	94.4089	20054	88.9498	12294	81.5194	7491	91.2161	18378	94.7546	20183	89.1939	20988	81.4894	16032	91.3049
G69C	9090	72.1562	12796	78.0478	10264	94.7097	13006	93.3954	7197	86.8001	4743	94.3707	12128	94.9786	12873	93.0164	13383	86.0121	9462	93.8491
G69T	11191	83.2812	15236	85.7771	14573	96.219	15478	95.0963	9676	90.6573	5809	95.1282	13842	95.8676	16190	95.2749	16440	90.2129	12999	95.6689
A70C	9485	45.4085	11078	52.1033	16185	96.4164	18833	94.5734	8779	76.2388	6555	95.8505	18162	96.4101	15389	89.7849	13453	67.078	14034	95.4254
A70G	16461	15.3636	17729	17.7449	26628	92.1173	25391	53.2787	13689	22.8212	8867	72.392	25946	93.0779	19198	30.9772	21164	20.171	24238	83.8147
A70T	15724	29.3182	16717	32.7092	28026	96.5639	24240	79.8432	12565	37.684	8559	90.2442	24158	95.8978	19014	52.6717	20060	33.2004	22697	94.0609
A71C	18602	24.5995	19584	27.4357	40531	95.7884	32936	70.9406	16284	34.9423	11439	84.5091	35700	95.8291	24631	47.4727	24913	31.2809	32618	91.4188
A71G	17949	20.9315	18799	23.5066	36379	96.5145	34809	78.7411	15776	37.3415	11815	88.6246	34256	96.605	24880	55.6069	23935	28.3852	33002	93.5307
A71T	19015	15.3668	21245	20.9602	35513	94.8723	30216	69.8074	16321	36.4867	11299	83.8658	31013	93.9541	25950	52.185	25662	29.1715	31820	90.9617
A72C	17510	14.7173	18290	15.708	37089	85.9257	27296	38.1411	15156	18.9232	9509	54.7797	30819	87.764	21111	25.5696	23447	16.4669	29611	69.5586
A72G	18183	17.4394	19438	18.9474	38377	94.8797	31091	63.401	15625	29.0688	10897	78.5996	33206	95.4376	23904	41.6918	23692	23.3117	35853	89.7247
A72T	18357	18.8593	19569	20.4763	35757	91.8394	28808	51.3225	15461	23.9376	10124	70.1403	29671	92.2146	21678	31.7326	23581	21.8057	29529	82.9083
T1A;T2A	250	11.2	255	6.27451	187	68.984	291	23.3677	204	16.6667	87	54.023	191	69.6335	255	10.9804	301	15.9468	212	53.3019
T1A;T2C	202	13.8614	213	10.3286	156	72.4359	257	31.5175	132	21.9697	71	56.338	171	76.6082	213	19.2488	202	13.3663	167	65.2695
T1A;T2G	198	13.6364	211	20.8531	220	48.6364	255	16.4706	202	14.3564	100	29	223	66.3677	197	16.2437	247	17.8138	212	32.0755
T1A;T3A	146	8.21918	187	11.7647	107	77.5701	130	52.3077	114	10.5263	44	68.1818	89	84.2697	189	26.455	252	15.4762	81	70.3704
T1A;T3C	98	18.3673	136	23.5294	75	78.6667	124	50	72	20.8333	39	66.6667	72	79.1667	96	36.4583	122	32.7869	70	67.1429
T1A;T3G	202	20.7921	208	15.3846	163	86.5031	219	60.274	119	15.1261	81	76.5432	200	92.5	183	35.5191	235	24.2553	125	70.4
T1A;C4A	127	11.811	166	12.6506	49	65.3061	103	43.6893	125	10.4	23	69.5652	49	75.5102	93	24.7312	179	22.3464	44	61.3636
T1A;C4G	63	47.619	76	32.8947	52	63.4615	60	60	25	20	16	50	53	49.0566	63	46.0317	62	43.5484	59	42.3729
T1A;C4T	158	6.96203	179	7.82123	79	62.0253	125	46.4	128	12.5	46	56.5217	82	84.1463	102	20.5882	162	12.3457	59	57.6271
T1A;A5C	63	46.0317	89	61.7978	48	77.0833	74	77.027	46	60.8696	25	80	83	83.1325	77	71.4286	97	48.4536	56	83.9286
T1A;A5G	147	6.80272	164	15.2439	76	69.7368	168	34.5238	114	9.64912	47	57.4468	109	82.5688	145	17.2414	211	15.6398	115	67.8261
T1A;A5T	44	9.09091	35	17.1429	16	56.25	20	30	18	16.6667	2	50	18	44.4444	18	61.1111	37	21.6216	11	63.6364
T1A;G6A	253	80.6324	327	79.8165	282	91.4894	371	94.6092	215	87.907	121	90.0826	341	94.4282	379	91.2929	422	86.4929	253	92.8854
T1A;G6C	214	63.5514	276	67.3913	353	95.4674	334	93.1138	227	79.7357	144	95.1389	311	92.926	334	90.1198	309	78.3172	330	95.4545
T1A;G6T	182	31.3187	264	45.0758	281	93.5943	345	88.9855	164	61.5854	128	87.5	260	90.3846	263	82.8897	247	56.2753	268	86.9403
T1A;C7A	146	66.4384	184	69.0217	139	84.1727	181	87.2928	85	81.1765	69	94.2029	174	94.2529	169	82.2485	177	77.4011	118	78.8136
T1A;C7G	74	68.9189	108	73.1481	62	82.2581	85	83.5294	63	77.7778	30	83.3333	94	82.9787	106	81.1321	104	68.2692	82	87.8049
T1A;C7T	251	25.498	249	39.759	344	93.6047	347	76.3689	176	33.5227	147	87.7551	331	93.3535	250	56	268	36.9403	330	85.1515
T1A;C8A	259	40.1544	298	44.2953	605	93.8843	614	89.0879	261	62.8352	221	91.4027	503	91.6501	428	77.8037	389	54.4987	437	93.8215
T1A;C8G	133	72.9323	164	79.2683	137	85.4015	199	88.4422	97	85.567	83	97.5904	144	93.0556	176	88.6364	202	89.1089	120	93.3333
T1A;C8T	205	20.9756	279	29.3907	494	94.7368	423	68.7943	188	40.4255	186	81.7204	408	90.4412	267	46.4419	292	32.8767	416	91.1058
T1A;G9A	320	8.4375	322	9.31677	283	37.1025	390	10.2564	232	6.89655	109	11.9266	269	40.5204	297	7.74411	387	11.6279	350	19.1429
T1A;G9C	250	11.2	275	11.2727	251	13.9442	319	8.77743	197	10.1523	98	15.3061	254	24.4094	282	8.15603	354	11.5819	273	9.52381
T1A;G9T	213	6.57277	185	1.62162	116	6.89655	230	9.56522	202	9.90099	89	6.74157	111	21.6216	174	5.74713	275	10.9091	219	4.56621
T1A;G10A	281	12.8114	329	12.766	415	56.6265	385	18.961	251	10.3586	116	29.3103	420	70.7143	296	14.1892	365	16.4384	361	36.0111
T1A;G10C	232	17.6724	258	9.68992	288	48.6111	280	16.7857	167	11.3772	97	23.7113	222	68.018	248	16.5323	267	15.7303	257	31.5175
T1A;G10T	258	8.13953	278	7.19424	243	18.5185	343	6.41399	233	9.44206	111	19.8198	184	25.5435	292	6.50685	329	10.9422	330	11.8182
T1A;A11C	177	13.5593	149	8.05369	165	24.8485	194	14.433	134	15.6716	66	19.697	160	41.25	154	11.039	177	12.9944	156	20.5128
T1A;A11G	143	19.5804	159	25.7862	301	87.0432	246	71.1382	139	38.8489	105	81.9048	244	84.4262	214	51.8692	211	29.3839	223	79.8206
T1A;A11T	202	3.9604	197	7.61421	152	21.0526	239	6.69456	132	10.6061	54	9.25926	134	27.6119	184	7.06522	242	8.26446	203	9.85222
T1A;A12C	205	8.29268	184	7.06522	119	15.1261	200	9	136	9.55882	71	9.85915	143	23.7762	182	9.89011	234	15.812	207	10.1449
T1A;A12G	179	7.26257	147	12.2449	127	63.7795	202	22.7723	124	10.4839	63	30.1587	117	68.3761	145	12.4138	198	9.59596	182	41.7582
T1A;A12T	284	16.9014	236	13.9831	183	5.46448	256	11.7188	188	15.4255	80	7.5	173	14.4509	206	11.165	277	10.4693	188	12.234
T1A;G13A	162	10.4938	172	16.8605	114	68.4211	129	62.7907	106	28.3019	38	76.3158	104	77.8846	142	61.2676	164	30.4878	111	71.1712
T1A;G13C	187	5.88235	181	8.83978	119	37.8151	208	13.4615	122	9.01639	53	32.0755	95	57.8947	171	12.2807	215	9.30233	124	20.9677
T1A;G13T	208	10.0962	186	4.83871	93	53.7634	152	21.0526	137	9.48905	50	46	91	58.2418	173	19.0751	212	10.3774	106	35.8491
T1A;C14A	171	14.6199	174	12.6437	146	13.0137	183	12.0219	159	23.2704	58	12.069	158	15.8228	190	14.2105	204	24.0196	174	9.77011
T1A;C14G	168	9.52381	149	17.4497	139	6.47482	184	9.78261	118	15.2542	66	19.697	138	24.6377	146	8.90411	198	15.6566	159	7.54717
T1A;C14T	173	4.62428	184	5.97826	175	8.57143	246	4.06504	125	3.2	80	6.25	184	19.0217	194	8.24742	266	8.64662	200	8
T1A;G15A	222	16.6667	261	8.81226	218	5.9633	298	11.4094	234	11.5385	82	10.9756	186	17.7419	219	5.47945	317	13.8801	215	12.093
T1A;G15C	192	4.6875	238	11.3445	168	14.881	268	6.34328	166	6.0241	62	9.67742	160	29.375	186	5.91398	235	3.82979	222	6.75676
T1A;G15T	169	2.95858	218	10.0917	202	12.8713	250	8	189	4.2328	82	3.65854	160	22.5	212	5.66038	278	8.27338	228	7.89474
T1A;G16A	157	1.91083	160	5	137	3.64964	223	6.72646	107	2.80374	52	9.61538	139	16.5468	157	3.18471	189	5.82011	184	0
T1A;G16C	84	13.0952	87	24.1379	112	15.1786	112	25.8929	65	26.1538	34	11.7647	123	31.7073	100	20	96	12.5	125	16.8
T1A;G16T	145	7.58621	163	7.97546	146	6.16438	159	8.1761	85	7.05882	56	10.7143	141	16.3121	124	4.03226	169	3.5503	178	3.93258
T1A;G17A	205	2.43902	244	10.2459	177	15.8192	285	10.8772	192	6.25	78	11.5385	172	37.7907	251	12.3506	274	12.0438	245	6.93878
T1A;G17C	177	17.5141	219	20.5479	182	35.7143	236	23.7288	167	17.9641	79	26.5823	189	49.7354	193	16.0622	217	17.0507	203	22.1675
T1A;G17T	212	4.24528	223	4.4843	197	14.2132	256	6.64062	164	7.31707	63	11.1111	134	39.5522	209	5.26316	242	5.78512	194	7.73196
T1A;A18C	186	20.9677	188	9.04255	166	15.6627	176	10.7955	159	15.0943	65	18.4615	127	22.8346	176	13.0682	242	9.91736	159	15.7233
T1A;A18G	217	12.9032	220	12.2727	211	17.0616	240	10.8333	161	18.6335	79	21.519	177	23.1638	267	15.3558	249	13.6546	229	13.9738
T1A;A18T	137	10.219	105	6.66667	108	18.5185	133	10.5263	94	10.6383	41	12.1951	132	21.9697	133	17.2932	133	11.2782	119	12.605
T1A;C19A	213	20.6573	233	20.1717	207	36.715	239	19.2469	147	15.6463	70	35.7143	196	36.2245	173	30.6358	241	25.7261	217	24.8848
T1A;C19G	169	10.6509	176	13.0682	203	13.7931	211	17.0616	142	11.9718	62	20.9677	165	23.6364	152	9.86842	226	15.0442	189	13.7566
T1A;C19T	168	7.14286	162	7.40741	144	13.1944	166	10.8434	120	2.5	72	12.5	129	20.9302	139	7.19424	169	4.73373	177	3.9548
T1A;G20A	191	15.1832	250	21.2	210	40.4762	243	23.0453	185	10.2703	77	23.3766	200	57	185	30.8108	277	17.6895	247	18.2186
T1A;G20C	209	15.7895	192	13.5417	258	28.2946	266	14.6617	159	15.0943	88	20.4545	212	37.2642	214	16.3551	267	17.2285	257	19.0661
T1A;G20T	282	29.4326	253	30.4348	259	38.61	287	30.662	226	28.3186	83	33.7349	251	52.1912	230	34.7826	300	28.6667	292	28.0822
T1A;A21C	238	13.4454	206	13.1068	162	12.3457	269	17.1004	165	15.1515	75	20	155	14.8387	198	10.6061	244	13.1148	213	7.51174
T1A;A21G	184	12.5	177	20.339	287	77.3519	277	37.1841	150	22.6667	74	56.7568	268	82.8358	222	23.8739	275	21.0909	238	68.9076
T1A;A21T	216	11.5741	210	12.381	211	20.3791	246	13.4146	179	16.2011	83	15.6627	198	32.3232	217	15.6682	250	14.4	276	15.942
T1A;C22A	216	9.25926	163	14.7239	180	19.4444	228	10.5263	147	10.8844	65	16.9231	193	28.4974	161	9.93789	251	10.757	201	13.4328
T1A;C22G	80	7.5	104	3.84615	87	9.1954	123	8.13008	73	8.21918	36	11.1111	81	16.0494	131	4.58015	99	12.1212	92	3.26087
T1A;C22T	160	10	196	5.10204	171	15.2047	184	9.23913	135	4.44444	58	13.7931	149	25.5034	173	5.78035	168	8.33333	180	9.44444
T1A;C23A	110	3.63636	140	3.57143	148	5.40541	153	3.92157	87	3.44828	54	9.25926	141	18.4397	108	6.48148	159	4.40252	153	3.26797
T1A;C23G	34	20.5882	49	18.3673	47	19.1489	51	19.6078	26	19.2308	17	11.7647	47	31.9149	38	23.6842	43	23.2558	46	26.087
T1A;C23T	141	7.0922	137	4.37956	146	8.90411	215	4.65116	140	4.28571	39	10.2564	147	11.5646	149	7.38255	173	4.62428	143	0.699301
T1A;C24A	139	10.0719	176	16.4773	148	14.8649	173	13.2948	114	11.4035	42	11.9048	162	19.1358	134	11.9403	178	16.2921	148	10.1351
T1A;C24G	157	24.8408	181	24.3094	173	32.3699	216	30.0926	146	16.4384	66	13.6364	161	36.646	190	13.1579	204	23.5294	173	16.185
T1A;C24T	137	12.4088	150	16	178	34.8315	249	16.4659	111	12.6126	67	22.3881	189	48.6772	170	22.9412	200	15.5	173	16.185
T1A;G25A	242	4.13223	283	3.53357	232	4.31034	280	4.64286	191	7.32984	83	3.61446	165	22.4242	223	3.58744	269	3.71747	228	4.82456
T1A;G25C	297	12.7946	293	13.6519	215	18.1395	349	16.6189	243	19.3416	105	8.57143	215	29.7674	280	15.3571	323	18.2663	273	12.0879
T1A;G25T	252	9.52381	268	14.1791	204	15.1961	295	7.79661	207	9.66184	83	3.61446	186	29.5699	255	9.80392	328	12.1951	280	7.14286
T1A;T26A	282	13.8298	287	19.1638	559	74.2397	400	27.75	226	16.3717	107	36.4486	445	75.2809	300	21	352	15.0568	454	55.9471
T1A;T26C	187	21.3904	208	21.6346	396	89.1414	261	47.5096	180	22.2222	124	76.6129	342	88.8889	206	27.6699	244	17.2131	353	86.4023
T1A;T26G	212	13.6792	256	17.1875	391	70.844	309	28.1553	188	19.1489	95	50.5263	321	68.2243	214	21.028	262	17.1756	279	50.8961
T1A;T27A	259	12.3552	292	17.8082	481	71.5177	356	28.9326	221	18.0995	113	37.1681	404	75.2475	280	19.6429	357	20.1681	406	46.3054
T1A;T27C	152	19.0789	196	16.8367	426	88.4977	297	52.5253	153	28.7582	99	69.697	329	89.6657	211	32.2275	176	18.1818	330	80.9091
T1A;T27G	213	10.7981	247	10.5263	247	33.1984	265	18.1132	177	14.1243	82	12.1951	224	36.6071	220	20.9091	279	12.5448	228	26.7544
T1A;T28A	314	11.7834	284	13.0282	490	68.5714	357	20.4482	204	13.7255	117	43.5897	444	72.7477	298	17.1141	367	17.1662	386	42.7461
T1A;T28C	180	9.44444	216	19.9074	291	59.7938	253	22.5296	167	14.9701	67	29.8507	262	68.3206	200	19.5	230	14.7826	256	38.6719
T1A;T28G	141	15.6028	191	20.4188	222	35.1351	221	23.9819	151	15.894	58	18.9655	133	39.8496	174	14.3678	211	18.9573	197	16.7513
T1A;T29A	291	13.4021	272	8.82353	438	67.1233	323	20.1238	209	8.61244	98	25.5102	402	70.1493	254	15.748	313	14.0575	335	34.0299
T1A;T29C	192	31.25	183	31.1475	425	85.1765	282	63.8298	154	32.4675	117	73.5043	377	87.7984	220	43.1818	211	33.1754	333	76.2763
T1A;T29G	251	13.9442	258	12.0155	221	28.9593	243	12.7572	151	11.2583	71	18.3099	187	34.7594	185	20.5405	244	14.3443	253	21.3439
T1A;C30A	244	11.0656	246	8.53659	216	48.1481	293	13.6519	164	12.8049	96	22.9167	222	55.4054	201	8.45771	304	15.1316	271	21.4022
T1A;C30G	159	4.40252	171	8.18713	138	15.942	249	10.8434	138	13.0435	49	14.2857	151	30.4636	155	8.3871	232	9.05172	174	10.9195
T1A;C30T	245	16.7347	264	20.4545	442	77.1493	340	23.2353	205	13.1707	112	28.5714	393	78.3715	259	16.9884	285	12.6316	340	41.7647
T1A;C31A	187	8.55615	167	6.58683	93	33.3333	207	14.9758	163	9.81595	53	13.2075	93	43.0108	151	5.29801	270	14.4444	138	12.3188
T1A;C31G	135	7.40741	175	10.8571	156	51.9231	194	17.0103	132	10.6061	53	22.6415	156	63.4615	150	9.33333	163	12.2699	147	42.8571
T1A;C31T	188	14.3617	219	8.6758	197	57.3604	235	18.7234	148	17.5676	80	17.5	221	69.6833	206	12.6214	272	13.2353	243	41.1523
T1A;C32A	215	14.8837	212	12.7358	468	90.5983	346	43.3526	183	13.6612	140	65.7143	392	88.2653	194	20.6186	232	16.8103	368	81.7935
T1A;C32G	124	5.64516	129	10.8527	72	73.6111	117	44.4444	91	14.2857	38	68.4211	71	83.0986	138	22.4638	177	17.5141	92	84.7826
T1A;C32T	198	15.1515	245	15.9184	444	88.2883	295	33.2203	165	13.3333	112	63.3929	367	90.7357	243	20.9877	303	16.8317	358	75.419
T1A;T33A	276	14.4928	262	21.374	691	87.9884	392	37.2449	176	19.3182	149	69.1275	562	85.9431	266	27.0677	310	16.7742	478	73.0126
T1A;T33C	234	16.6667	217	13.8249	411	79.0754	316	37.9747	177	16.9492	96	56.25	409	83.8631	255	29.0196	276	21.7391	357	62.465
T1A;T33G	147	22.449	194	24.7423	202	29.2079	254	31.1024	150	28	74	43.2432	187	49.1979	200	24	205	20.4878	238	30.6723
T1A;C34A	209	17.7033	230	16.9565	527	89.5636	287	28.9199	150	16.6667	146	56.8493	340	87.0588	229	26.2009	259	15.8301	369	76.4228
T1A;C34G	200	17	231	18.6147	289	73.0104	280	37.5	169	16.568	78	44.8718	233	72.9614	234	21.7949	265	21.8868	246	54.878
T1A;C34T	275	14.1818	326	15.9509	624	87.1795	347	35.7349	229	24.8908	158	64.557	507	89.3491	299	21.7391	335	16.7164	535	73.6449
T1A;T35A	240	20.4167	259	13.1274	535	81.1215	349	36.6762	211	23.6967	124	51.6129	480	88.75	289	30.4498	309	18.4466	393	72.7735
T1A;T35C	222	19.8198	206	17.9612	571	86.69	336	43.1548	129	15.5039	131	64.8855	418	87.0813	217	33.6406	239	16.318	427	70.2576
T1A;T35G	215	15.3488	209	16.2679	344	70.3488	238	36.5546	145	18.6207	73	42.4658	294	71.7687	176	23.8636	239	16.7364	282	41.4894
T1A;T36A	198	8.08081	207	10.628	266	75.5639	266	27.8195	188	14.3617	89	44.9438	298	79.8658	227	25.9912	256	11.3281	284	60.9155
T1A;T36C	153	3.92157	142	4.22535	133	22.5564	172	6.39535	112	6.25	49	20.4082	123	23.5772	128	7.03125	160	7.5	155	14.8387
T1A;T36G	181	20.9945	166	20.4819	321	91.9003	288	59.7222	134	24.6269	90	83.3333	294	91.8367	206	47.0874	182	20.3297	284	81.6901
T1A;T37A	205	13.6585	180	17.7778	233	75.5365	238	24.7899	159	14.4654	77	54.5455	208	83.6538	177	18.6441	259	15.444	286	55.5944
T1A;T37C	151	19.2053	155	18.0645	376	81.6489	252	36.1111	124	22.5806	86	51.1628	338	85.2071	199	26.1307	228	19.7368	281	57.2954
T1A;T37G	197	14.2132	222	11.2613	337	92.5816	266	59.7744	153	20.915	109	79.8165	271	89.2989	193	29.5337	209	14.8325	271	81.1808
T1A;C38A	166	10.8434	168	14.2857	135	60.7407	223	26.9058	144	11.8056	53	45.283	157	68.1529	181	7.73481	195	11.7949	178	54.4944
T1A;C38G	155	7.74194	186	9.13978	240	67.5	228	17.9825	141	11.3475	104	44.2308	222	76.1261	176	13.6364	212	8.49057	221	48.8688
T1A;C38T	149	6.04027	160	10	138	63.7681	172	19.186	97	12.3711	66	42.4242	136	75	152	17.7632	201	6.96517	168	55.9524
T1A;A39C	222	11.7117	252	21.0317	293	80.8874	308	39.2857	167	14.9701	77	67.5325	256	85.1562	222	26.1261	284	15.8451	287	67.9443
T1A;A39G	253	18.9723	254	13.7795	373	76.9437	345	28.4058	223	19.7309	102	33.3333	332	73.494	280	22.5	326	17.7914	358	57.5419
T1A;A39T	237	12.2363	196	9.69388	340	70	268	25	214	15.4206	100	31	308	77.5974	235	22.1277	272	12.8676	330	49.3939
T1A;T40A	198	9.09091	228	6.57895	310	73.871	291	25.4296	204	12.7451	86	43.0233	274	73.7226	237	18.9873	296	11.1486	268	50
T1A;T40C	177	14.6893	230	15.2174	297	85.1852	295	37.9661	164	12.1951	114	52.6316	285	81.7544	186	19.3548	270	13.3333	258	65.8915
T1A;T40G	184	8.15217	201	14.4279	239	69.8745	239	24.6862	150	14	87	29.8851	233	71.6738	169	13.6095	259	20.0772	212	49.5283
T1A;T41A	193	12.4352	201	11.9403	304	72.3684	291	36.0825	167	10.7784	99	47.4747	310	81.2903	202	21.7822	219	15.9817	311	58.5209
T1A;T41C	194	10.3093	214	14.486	307	75.2443	259	28.9575	165	12.1212	76	40.7895	235	69.3617	190	17.3684	243	16.0494	259	47.4903
T1A;T41G	152	8.55263	224	8.92857	231	58.0087	210	16.1905	160	10.625	78	11.5385	195	63.5897	190	10.5263	245	15.102	222	36.4865
T1A;G42A	190	14.2105	222	12.1622	219	62.1005	288	19.7917	154	12.3377	103	30.0971	216	72.2222	235	15.7447	287	15.331	264	50.7576
T1A;G42C	182	13.7363	228	13.5965	318	75.1572	302	30.4636	188	15.4255	116	45.6897	308	78.2468	262	15.6489	336	16.0714	330	53.9394
T1A;G42T	301	5.98007	308	9.09091	271	67.8967	359	25.3482	250	14	115	40.8696	264	68.9394	283	11.6608	338	11.8343	299	55.1839
T1A;C43A	294	8.5034	316	12.0253	334	55.0898	364	16.4835	243	10.6996	112	25	334	47.006	272	12.5	282	10.2837	382	28.2723
T1A;C43G	182	7.69231	209	10.5263	189	26.9841	257	10.5058	189	11.1111	85	10.5882	171	33.3333	180	12.7778	248	14.5161	233	13.3047
T1A;C43T	264	11.3636	251	10.757	227	59.0308	276	25	192	11.4583	99	35.3535	241	72.6141	207	16.9082	305	13.1148	224	56.25
T1A;G44A	257	11.6732	285	11.2281	237	8.86076	327	11.9266	236	11.4407	93	5.37634	198	20.202	274	4.37956	360	10.5556	282	8.51064
T1A;G44C	225	16	217	10.1382	301	63.4551	300	27	180	21.6667	100	35	273	74.7253	232	19.8276	268	17.5373	284	50.3521
T1A;G44T	234	12.8205	240	6.66667	243	37.037	314	14.3312	192	8.33333	91	18.6813	277	54.8736	267	10.4869	292	8.21918	303	19.4719
T1A;C45A	192	10.9375	244	10.2459	198	20.7071	271	8.48708	184	9.23913	80	7.5	179	25.6983	254	9.44882	278	13.3094	242	7.43802
T1A;C45G	187	8.02139	205	9.26829	172	20.3488	227	11.0132	139	7.19424	56	23.2143	131	28.2443	165	2.42424	185	7.02703	192	9.375
T1A;C45T	184	1.63043	209	5.74163	178	49.4382	232	15.9483	180	3.88889	81	27.1605	170	62.9412	202	10.8911	244	9.42623	199	23.1156
T1A;G46A	183	16.3934	208	32.6923	178	75.8427	199	69.3467	158	48.1013	77	71.4286	169	82.2485	177	69.4915	205	37.0732	182	70.8791
T1A;G46C	311	18.9711	288	12.1528	413	56.9007	354	22.3164	213	14.554	111	25.2252	335	65.0746	290	18.9655	367	17.4387	365	36.4384
T1A;G46T	300	46	385	54.8052	442	80.7692	374	60.1604	230	43.913	151	68.8742	398	85.9296	378	60.582	384	52.6042	399	67.4185
T1A;G47A	281	32.3843	325	35.0769	521	69.2898	431	42.6914	201	32.3383	146	61.6438	512	83.5938	337	48.368	335	43.8806	412	49.7573
T1A;G47C	294	23.1293	279	25.448	369	52.8455	331	29.3051	224	21.875	103	32.0388	317	64.3533	281	29.5374	355	21.9718	356	29.2135
T1A;G47T	289	29.0657	354	24.2938	478	54.6025	428	32.0093	232	26.2931	116	38.7931	398	69.3467	342	30.9942	351	29.6296	390	37.4359
T1A;G48A	227	18.0617	291	13.4021	300	35.3333	334	25.1497	220	13.1818	100	20	241	42.3237	220	25.4545	314	20.7006	298	16.7785
T1A;G48C	171	23.3918	256	32.8125	245	35.5102	279	33.3333	168	27.9762	88	44.3182	227	56.3877	252	30.9524	265	27.9245	198	21.7172
T1A;G48T	299	27.7592	334	35.0299	351	47.5783	416	28.8462	253	23.7154	111	31.5315	350	61.7143	339	31.5634	321	31.4642	320	27.8125
T1A;G49A	277	11.1913	318	12.8931	283	19.0813	337	15.1335	218	15.1376	99	10.101	229	34.4978	261	14.9425	301	12.6246	314	14.3312
T1A;G49C	226	7.52212	224	10.2679	202	11.3861	286	10.4895	202	10.8911	73	5.47945	204	16.1765	200	8.5	271	12.9151	241	6.639
T1A;G49T	307	12.0521	271	11.0701	248	5.64516	321	11.215	259	11.9691	94	9.57447	214	7.94393	261	9.96169	325	15.6923	289	8.3045
T1A;A50C	216	11.1111	181	14.3646	154	14.2857	223	12.5561	148	13.5135	71	12.6761	140	17.1429	180	2.77778	258	12.0155	220	14.5455
T1A;A50G	156	12.8205	168	13.6905	122	27.8689	158	14.557	120	11.6667	77	18.1818	122	34.4262	142	11.9718	187	9.62567	150	9.33333
T1A;A50T	234	10.6838	251	16.3347	180	13.8889	284	15.8451	191	11.5183	90	12.2222	178	16.2921	235	14.0426	341	11.437	252	11.5079
T1A;C51A	173	10.4046	165	16.9697	168	17.8571	229	12.6638	152	5.92105	67	13.4328	168	42.8571	168	15.4762	191	8.90052	193	13.4715
T1A;C51G	177	15.8192	218	11.9266	152	17.1053	230	15.2174	125	15.2	58	13.7931	151	33.1126	205	12.1951	220	13.6364	201	11.4428
T1A;C51T	161	7.45342	159	21.3836	188	28.7234	200	12.5	130	10	68	20.5882	179	48.6034	167	17.3653	217	17.0507	182	12.6374
T1A;G52A	163	13.4969	169	12.426	147	29.932	193	16.5803	144	11.8056	61	26.2295	128	46.875	154	14.2857	191	11.5183	208	19.7115
T1A;G52C	129	9.30233	155	12.2581	161	23.6025	159	18.8679	115	14.7826	69	24.6377	128	32.8125	144	10.4167	186	9.67742	155	16.7742
T1A;G52T	163	13.4969	184	19.5652	156	21.1538	198	16.6667	138	16.6667	64	17.1875	134	32.8358	141	21.2766	183	14.7541	188	7.97872
T1A;A53C	218	8.7156	243	9.87654	217	17.0507	296	12.1622	170	17.0588	100	16	191	26.7016	243	13.5802	307	10.0977	230	12.1739
T1A;A53G	186	15.0538	215	8.83721	227	48.8987	230	12.1739	172	11.0465	89	23.5955	206	53.3981	176	10.7955	266	10.9023	232	25.431
T1A;A53T	222	9.00901	263	12.1673	233	12.0172	308	14.6104	189	17.4603	82	24.3902	233	20.6009	247	13.3603	309	12.2977	242	12.3967
T1A;C54A	241	17.8423	258	20.155	246	19.9187	295	14.9153	165	18.7879	99	18.1818	221	32.1267	223	13.0045	288	14.9306	276	16.3043
T1A;C54G	228	9.64912	213	10.3286	206	14.0777	227	14.0969	144	9.02778	65	7.69231	169	13.6095	201	8.95522	230	11.7391	212	10.3774
T1A;C54T	310	20.3226	300	14.3333	280	15.7143	350	14.5714	201	17.4129	115	13.0435	247	17.4089	279	10.7527	351	8.83191	293	15.0171
T1A;C55A	187	8.55615	210	10.9524	213	28.6385	253	13.0435	186	6.98925	85	18.8235	205	41.9512	173	12.7168	243	18.107	250	18
T1A;C55G	97	55.6701	116	54.3103	121	50.4132	135	60.7407	77	62.3377	42	78.5714	143	63.6364	130	66.1538	125	63.2	100	50
T1A;C55T	223	14.3498	213	12.6761	282	52.1277	265	27.9245	187	11.7647	91	43.956	261	55.1724	216	21.2963	270	15.9259	234	34.188
T1A;C56A	233	10.7296	248	12.9032	250	26.4	296	15.2027	184	11.413	111	23.4234	204	45.5882	229	9.17031	287	12.892	217	12.9032
T1A;C56G	176	5.68182	159	4.40252	127	14.1732	162	3.08642	122	4.09836	56	5.35714	104	28.8462	153	7.84314	176	7.38636	156	5.12821
T1A;C56T	278	10.0719	240	15.4167	286	37.4126	315	18.0952	209	9.09091	92	17.3913	258	53.876	250	19.2	296	7.77027	309	21.0356
T1A;T57A	192	10.9375	199	5.52764	218	30.7339	282	12.0567	175	3.42857	86	16.2791	180	33.8889	217	5.52995	231	10.8225	238	17.2269
T1A;T57C	232	15.0862	265	10.1887	122	69.6721	239	27.6151	162	16.0494	55	58.1818	129	69.7674	219	12.7854	271	12.5461	127	62.2047
T1A;T57G	154	9.09091	191	8.37696	159	15.7233	188	9.57447	151	7.94702	61	9.83607	135	33.3333	158	16.4557	226	11.9469	177	10.1695
T1A;G58A	169	18.9349	195	25.1282	389	84.0617	285	51.5789	121	24.7934	106	68.8679	354	90.9605	190	36.8421	214	29.9065	246	67.0732
T1A;G58C	169	22.4852	163	18.4049	291	76.2887	218	31.1927	131	17.5573	85	50.5882	232	84.9138	168	30.9524	182	20.3297	204	42.1569
T1A;G58T	266	20.6767	261	16.092	585	78.1197	361	33.795	211	23.2227	143	50.3497	506	87.747	302	30.1325	298	23.1544	382	53.1414
T1A;C59A	166	25.9036	188	34.5745	456	89.4737	298	70.4698	153	40.5229	135	85.1852	376	93.0851	211	45.9716	181	41.4365	346	90.1734
T1A;C59G	85	10.5882	118	7.62712	99	72.7273	111	38.7387	55	7.27273	44	59.0909	105	67.619	85	30.5882	89	16.8539	70	64.2857
T1A;C59T	247	13.7652	245	23.6735	380	82.3684	334	41.6168	187	25.1337	123	63.4146	335	86.8657	241	34.4398	240	25.8333	304	70.0658
T1A;A60C	186	17.2043	232	12.931	254	60.6299	282	27.305	182	14.8352	98	25.5102	274	67.5182	203	10.8374	272	12.8676	274	41.9708
T1A;A60G	185	7.02703	181	13.8122	170	78.2353	207	16.4251	150	12.6667	79	34.1772	156	72.4359	187	17.1123	230	13.4783	168	50
T1A;A60T	248	16.129	273	8.79121	260	34.2308	297	13.8047	176	11.3636	82	15.8537	233	38.1974	251	17.5299	287	15.6794	255	23.9216
T1A;G61A	246	12.1951	238	11.3445	214	70.5607	301	23.2558	177	24.2938	110	42.7273	219	68.9498	244	24.5902	262	14.5038	230	51.7391
T1A;G61C	201	18.9055	261	14.1762	575	81.5652	372	41.3978	219	21.4612	155	54.8387	388	83.7629	284	35.2113	296	22.2973	384	66.9271
T1A;G61T	309	13.5922	355	20	408	83.3333	445	35.9551	202	18.3168	154	57.7922	394	88.0711	303	32.3432	354	21.1864	391	71.3555
T1A;A62C	208	27.4038	227	17.6211	569	92.0914	325	69.5385	153	33.3333	173	81.5029	423	89.3617	293	49.8294	268	33.209	444	88.7387
T1A;A62G	201	16.9154	200	20	221	73.7557	231	38.5281	145	27.5862	72	52.7778	233	74.2489	192	28.6458	215	23.7209	231	54.5455
T1A;A62T	189	14.2857	206	15.0485	386	74.3523	265	30.9434	184	16.3043	70	38.5714	335	78.806	206	28.1553	276	17.7536	255	43.1373
T1A;G63A	299	13.3779	306	12.7451	506	66.996	383	25.5875	258	15.1163	131	30.5344	442	72.6244	303	15.8416	399	16.5414	370	37.8378
T1A;G63C	292	12.3288	303	11.2211	511	73.1898	367	20.1635	242	14.4628	114	28.9474	463	76.4579	309	13.2686	384	15.8854	414	43.4783
T1A;G63T	336	12.2024	342	12.8655	1120	93.4821	481	38.8773	266	10.9023	188	64.3617	827	95.0423	312	26.9231	448	15.625	749	81.976
T1A;A64C	200	9	236	11.8644	371	74.6631	254	20.0787	165	13.3333	91	29.6703	356	75.8427	235	12.3404	261	15.7088	278	47.1223
T1A;A64G	159	14.4654	197	20.3046	339	89.3805	251	47.4104	165	21.2121	108	75.9259	286	89.1608	221	35.2941	210	14.7619	316	80.3797
T1A;A64T	251	17.1315	247	12.1457	515	84.466	319	26.3323	212	16.5094	128	51.5625	460	87.6087	265	15.4717	289	12.1107	337	63.5015
T1A;G65A	267	19.8502	331	21.148	930	97.3118	827	91.2938	317	48.5804	324	94.1358	642	97.6636	601	74.5424	402	35.5721	774	95.7364
T1A;G65C	138	12.3188	150	7.33333	163	95.092	201	87.0647	127	29.9213	60	80	217	95.8525	212	66.9811	179	11.7318	170	88.8235
T1A;G65T	166	28.9157	236	36.4407	540	97.2222	566	97.8799	272	69.8529	190	98.4211	485	95.8763	444	87.1622	317	49.2114	467	97.2163
T1A;G66A	140	42.1429	189	57.1429	148	92.5676	240	92.9167	112	78.5714	78	93.5897	206	94.6602	209	91.866	225	68.8889	128	86.7188
T1A;G66C	187	32.6203	274	51.0949	404	97.2772	488	96.3115	278	90.2878	204	96.0784	386	95.8549	497	96.5795	407	77.3956	402	95.2736
T1A;G66T	175	60.5714	221	75.1131	169	95.2663	207	91.3043	127	85.8268	75	92	192	96.3542	211	93.3649	233	78.5408	149	93.2886
T1A;C67A	74	33.7838	62	43.5484	39	76.9231	60	75	33	78.7879	34	67.6471	54	72.2222	66	74.2424	90	47.7778	29	55.1724
T1A;C67G	131	7.63359	125	3.2	32	46.875	64	31.25	67	5.97015	9	33.3333	33	45.4545	69	18.8406	94	8.51064	29	31.0345
T1A;C67T	125	12	148	17.5676	29	62.069	47	51.0638	70	18.5714	12	58.3333	43	65.1163	77	38.961	137	24.0876	42	66.6667
T1A;T68A	60	38.3333	88	51.1364	53	79.2453	54	81.4815	41	70.7317	16	87.5	49	81.6327	53	84.9057	81	55.5556	38	81.5789
T1A;T68C	104	17.3077	135	24.4444	43	76.7442	77	62.3377	53	35.8491	24	70.8333	72	83.3333	75	64	102	35.2941	55	56.3636
T1A;T68G	125	0.8	122	7.37705	30	50	36	11.1111	89	3.37079	18	16.6667	42	54.7619	83	15.6627	138	6.52174	23	26.087
T1A;G69A	194	61.8557	306	74.5098	244	95.082	308	89.2857	177	74.5763	114	96.4912	257	95.3307	301	88.0399	306	79.7386	230	90.4348
T1A;G69C	124	79.0323	169	81.6568	139	92.8058	181	96.6851	109	92.6606	71	95.7746	175	97.7143	154	96.7532	163	90.184	146	91.0959
T1A;G69T	213	75.1174	238	83.1933	218	98.6239	262	91.2214	156	89.7436	96	97.9167	213	100	234	95.2991	229	87.3362	188	97.3404
T1A;A70C	167	44.3114	175	48	369	97.019	393	94.402	177	67.2316	148	96.6216	356	98.0337	247	87.4494	241	62.6556	327	96.6361
T1A;A70G	166	15.0602	203	17.734	261	91.1877	291	51.89	165	23.0303	100	84	246	93.0894	201	23.8806	236	19.9153	242	83.0579
T1A;A70T	232	31.4655	206	36.4078	538	96.2825	386	75.6477	163	38.6503	153	91.5033	424	98.3491	242	51.6529	245	33.4694	416	94.4712
T1A;A71C	224	25	222	25.2252	680	94.2647	419	64.4391	168	34.5238	164	85.9756	538	95.539	297	41.7508	319	33.2288	532	88.1579
T1A;A71G	208	18.2692	213	20.6573	602	96.3455	493	77.8905	166	30.7229	190	89.4737	499	97.1944	289	48.4429	293	27.6451	523	93.499
T1A;A71T	242	14.4628	275	15.2727	639	94.8357	458	60.917	182	24.7253	202	75.7426	539	94.8052	278	39.5683	285	20.3509	537	86.406
T1A;A72C	223	11.6592	263	14.8289	493	82.9615	290	35.8621	177	12.4294	132	53.0303	400	87.75	255	25.098	299	21.4047	402	65.1741
T1A;A72G	230	13.4783	229	15.2838	627	93.3014	396	52.7778	196	20.9184	147	72.7891	552	93.8406	249	32.5301	307	18.5668	595	85.2101
T1A;A72T	231	16.4502	218	10.5505	316	72.1519	298	25.5034	174	13.2184	95	29.4737	308	78.2468	228	22.807	272	10.6618	371	51.752
T1C;T2A	204	17.1569	190	25.2632	167	76.6467	272	58.8235	177	31.0734	85	71.7647	206	88.835	265	41.5094	273	26.3736	188	81.383
T1C;T2C	116	25	199	34.1709	128	86.7188	188	64.3617	124	28.2258	85	80	153	85.6209	157	47.1338	181	35.9116	114	78.9474
T1C;T2G	141	34.0426	166	42.7711	191	93.7173	227	67.4009	125	40	94	79.7872	192	92.1875	161	60.8696	205	36.5854	152	90.7895
T1C;T3A	94	34.0426	120	35.8333	89	86.5169	96	77.0833	79	44.3038	40	90	76	90.7895	108	47.2222	132	36.3636	88	79.5455
T1C;T3C	109	51.3761	164	58.5366	101	81.1881	153	79.085	82	45.122	42	92.8571	107	91.5888	134	64.1791	154	46.7532	101	85.1485
T1C;T3G	116	27.5862	115	40	106	87.7358	135	77.037	76	38.1579	42	92.8571	95	92.6316	112	49.1071	151	41.0596	69	85.5072
T1C;C4A	69	33.3333	68	45.5882	32	62.5	60	68.3333	39	66.6667	19	73.6842	44	86.3636	41	75.6098	53	52.8302	30	50
T1C;C4G	46	36.9565	81	56.7901	34	64.7059	45	73.3333	41	70.7317	13	69.2308	50	88	59	79.661	61	70.4918	47	78.7234
T1C;C4T	81	37.037	76	46.0526	45	77.7778	72	68.0556	41	39.0244	29	62.069	73	82.1918	54	77.7778	82	59.7561	57	71.9298
T1C;A5C	57	43.8596	97	58.7629	44	72.7273	57	80.7018	42	71.4286	21	90.4762	75	89.3333	65	70.7692	73	54.7945	47	72.3404
T1C;A5G	103	44.6602	130	60	96	83.3333	101	86.1386	76	61.8421	40	87.5	127	92.126	121	78.5124	147	60.5442	90	82.2222
T1C;A5T	36	8.33333	29	10.3448	8	37.5	13	53.8462	16	31.25	8	25	17	23.5294	9	22.2222	32	6.25	12	66.6667
T1C;G6A	210	83.8095	272	84.9265	262	94.2748	345	91.0145	187	89.3048	110	91.8182	247	95.5466	265	89.434	338	86.6864	252	89.6825
T1C;G6C	203	77.8325	234	84.188	257	95.3307	265	94.3396	173	82.659	90	94.4444	236	93.2203	259	87.6448	287	90.9408	237	89.0295
T1C;G6T	161	75.1553	208	84.1346	205	86.8293	261	88.1226	130	83.0769	77	88.3117	196	88.2653	222	91.4414	245	85.7143	203	86.6995
T1C;C7A	246	87.3984	266	87.218	268	93.6567	344	89.8256	199	89.9497	118	97.4576	267	93.633	299	92.6421	327	90.5199	244	94.2623
T1C;C7G	264	88.2576	296	90.2027	315	96.8254	400	95.25	215	94.4186	124	93.5484	274	95.2555	314	94.586	367	91.0082	292	96.5753
T1C;C7T	237	65.4008	240	58.3333	299	93.9799	317	87.3817	198	66.1616	119	89.0756	279	91.0394	277	71.8412	314	66.5605	243	90.1235
T1C;C8A	181	59.116	235	69.7872	338	94.9704	398	93.2161	162	73.4568	149	96.6443	296	94.9324	340	84.7059	276	77.1739	287	95.122
T1C;C8G	249	93.1727	332	92.4699	309	96.4401	398	96.2312	215	94.4186	129	95.3488	294	95.5782	319	98.4326	366	94.8087	293	95.5631
T1C;C8T	174	45.4023	213	43.662	316	94.9367	348	81.0345	188	51.0638	112	93.75	276	91.6667	283	64.6643	294	45.5782	279	93.9068
T1C;G9A	224	12.5	257	12.8405	232	54.7414	313	19.4888	216	12.5	83	22.8916	223	69.9552	281	14.9466	302	9.27152	252	43.6508
T1C;G9C	203	15.2709	238	12.605	230	25.2174	306	15.6863	186	14.5161	56	19.6429	179	37.4302	235	14.8936	258	17.0543	225	16.8889
T1C;G9T	240	13.3333	219	11.8721	143	41.2587	292	14.0411	161	14.2857	89	34.8315	155	72.9032	225	12	252	15.4762	181	31.4917
T1C;G10A	251	16.7331	253	18.1818	371	82.2102	348	35.9195	221	21.267	110	51.8182	303	83.4983	295	28.4746	301	18.2724	380	60.2632
T1C;G10C	167	14.3713	161	28.5714	156	64.1026	282	20.922	149	21.4765	83	28.9157	175	80	186	13.9785	220	13.6364	191	40.3141
T1C;G10T	229	17.0306	230	15.2174	215	53.9535	335	16.4179	186	16.6667	96	22.9167	189	61.9048	268	6.34328	315	15.5556	270	29.2593
T1C;A11C	94	13.8298	167	11.3772	86	36.0465	160	20.625	74	13.5135	49	6.12245	77	61.039	93	8.60215	149	16.1074	123	28.4553
T1C;A11G	156	28.2051	161	47.8261	227	94.2731	260	90.7692	119	59.6639	74	90.5405	195	93.8462	235	78.7234	183	45.9016	207	91.7874
T1C;A11T	225	9.77778	186	18.8172	136	35.2941	227	17.6211	132	11.3636	81	29.6296	144	61.1111	196	18.3673	218	13.7615	168	33.3333
T1C;A12C	156	12.8205	160	6.25	164	29.878	214	11.6822	108	12.963	67	8.95522	138	51.4493	144	15.9722	194	17.5258	179	18.4358
T1C;A12G	145	25.5172	133	25.5639	168	87.5	228	53.5088	129	27.907	62	75.8065	126	85.7143	175	29.7143	195	27.6923	174	81.0345
T1C;A12T	236	13.5593	239	12.5523	193	15.544	290	15.5172	168	12.5	74	13.5135	178	21.3483	235	12.766	274	11.6788	256	8.98438
T1C;G13A	219	74.8858	264	73.8636	239	90.3766	330	90	190	87.3684	101	90.099	229	89.9563	239	91.2134	309	82.5243	186	85.4839
T1C;G13C	208	29.8077	204	29.902	132	79.5455	212	65.0943	121	27.2727	80	72.5	151	84.7682	173	45.6647	231	31.1688	113	77.8761
T1C;G13T	232	35.7759	228	43.4211	172	87.2093	269	79.9257	172	51.7442	76	86.8421	156	89.7436	219	68.9498	253	46.2451	156	80.7692
T1C;C14A	256	44.9219	271	56.4576	173	27.1676	297	44.7811	171	37.4269	99	40.404	194	45.3608	231	48.0519	315	49.5238	214	34.1121
T1C;C14G	211	29.8578	231	43.29	225	33.7778	239	43.0962	146	26.0274	78	33.3333	166	53.6145	195	50.2564	233	44.206	196	31.1224
T1C;C14T	206	23.7864	210	28.5714	191	38.2199	238	21.0084	169	20.1183	91	19.7802	176	51.7045	184	27.1739	246	17.8862	178	16.2921
T1C;G15A	194	12.8866	212	17.4528	182	12.6374	237	15.1899	144	11.1111	64	18.75	173	21.9653	204	12.2549	280	13.5714	199	12.0603
T1C;G15C	141	20.5674	109	28.4404	116	45.6897	158	25.9494	96	28.125	42	26.1905	94	62.766	124	26.6129	152	19.0789	125	24
T1C;G15T	151	15.894	188	28.1915	136	47.7941	214	24.7664	120	14.1667	74	35.1351	163	61.9632	153	22.8758	204	21.5686	174	31.6092
T1C;G16A	269	16.3569	285	15.0877	260	15.7692	309	16.8285	183	8.74317	97	14.433	198	33.3333	253	10.2767	336	19.9405	252	9.92063
T1C;G16C	199	28.1407	193	20.7254	176	31.8182	237	24.8945	142	27.4648	73	31.5068	153	45.098	177	29.9435	232	25.431	205	21.4634
T1C;G16T	270	26.6667	250	14.8	276	25	287	28.9199	220	16.3636	82	26.8293	211	39.3365	186	16.6667	312	18.5897	266	19.9248
T1C;G17A	260	18.4615	276	30.4348	267	41.1985	328	28.6585	175	22.8571	109	34.8624	271	57.9336	241	28.2158	326	28.5276	271	33.2103
T1C;G17C	138	35.5072	180	47.2222	172	76.7442	221	53.3937	133	40.6015	72	63.8889	157	70.7006	156	45.5128	206	47.0874	125	58.4
T1C;G17T	251	15.5378	274	22.6277	252	44.8413	328	33.8415	214	24.7664	101	34.6535	221	71.9457	251	23.9044	299	24.4147	268	35.0746
T1C;A18C	114	14.9123	118	15.2542	97	16.4948	145	22.069	113	16.8142	59	16.9492	90	32.2222	140	20.7143	175	12	148	12.1622
T1C;A18G	182	16.4835	165	15.7576	196	24.4898	180	22.7778	133	15.0376	67	14.9254	129	27.1318	187	24.0642	199	13.5678	199	14.5729
T1C;A18T	82	4.87805	90	11.1111	83	16.8675	124	12.9032	68	10.2941	30	16.6667	86	16.2791	106	7.54717	90	6.66667	88	6.81818
T1C;C19A	175	36.5714	235	39.5745	238	58.4034	268	35.0746	138	33.3333	85	40	219	71.2329	193	36.2694	235	30.2128	247	38.8664
T1C;C19G	154	16.8831	177	14.6893	149	24.8322	188	18.617	128	18.75	54	18.5185	115	32.1739	171	19.2982	171	19.883	141	16.3121
T1C;C19T	246	18.6992	260	20.3846	174	27.0115	293	19.4539	134	19.403	88	23.8636	215	40	256	16.0156	260	21.5385	248	20.5645
T1C;G20A	231	54.1126	246	52.0325	212	72.1698	304	65.7895	178	54.4944	101	74.2574	217	75.1152	261	59.7701	280	55.3571	228	72.807
T1C;G20C	168	11.9048	156	15.3846	195	26.6667	265	14.717	158	10.7595	76	18.4211	167	35.9281	183	18.0328	181	22.6519	198	19.697
T1C;G20T	228	45.614	279	47.6703	291	69.4158	325	52.3077	189	47.619	97	51.5464	239	79.0795	263	52.8517	290	44.1379	248	55.6452
T1C;A21C	155	10.9677	207	16.9082	170	15.8824	242	16.1157	135	11.1111	70	12.8571	161	23.6025	175	13.1429	253	11.4625	187	13.369
T1C;A21G	177	33.8983	167	31.1377	209	91.3876	238	65.5462	126	36.5079	94	73.4043	181	89.5028	195	41.0256	212	31.1321	231	89.1775
T1C;A21T	180	19.4444	192	17.1875	203	32.0197	251	16.3347	129	15.5039	57	19.2982	155	48.3871	193	13.9896	221	14.9321	218	16.5138
T1C;C22A	198	25.7576	224	22.7679	178	47.191	253	27.2727	151	17.2185	86	37.2093	182	59.8901	208	25.4808	216	28.7037	210	29.5238
T1C;C22G	108	13.8889	111	15.3153	116	17.2414	130	13.8462	101	6.93069	36	13.8889	84	16.6667	115	12.1739	127	13.3858	118	10.1695
T1C;C22T	142	14.0845	157	12.7389	179	20.6704	190	16.8421	146	4.79452	83	12.0482	136	25.7353	155	16.7742	195	18.4615	184	6.52174
T1C;C23A	187	25.1337	220	24.0909	202	21.7822	214	20.0935	144	13.1944	61	22.9508	177	42.3729	181	24.8619	225	19.5556	222	15.3153
T1C;C23G	209	82.2967	234	74.359	171	67.8363	221	80.0905	135	81.4815	89	78.6517	204	78.9216	171	80.117	253	83.004	141	70.2128
T1C;C23T	192	15.625	185	10.8108	167	23.3533	236	13.1356	147	14.966	72	25	155	29.6774	225	10.6667	206	12.6214	201	14.4279
T1C;C24A	187	26.738	188	42.5532	168	42.2619	206	40.2913	159	29.5597	87	40.2299	163	50.9202	157	37.5796	217	40.553	182	32.967
T1C;C24G	147	55.102	180	49.4444	190	65.7895	196	47.449	136	47.7941	70	57.1429	150	66.6667	158	51.8987	194	55.1546	171	43.2749
T1C;C24T	176	40.9091	193	44.0415	184	77.7174	203	50.2463	119	42.0168	73	60.274	188	77.1277	153	44.4444	217	42.3963	169	56.213
T1C;G25A	266	11.2782	290	10.6897	265	17.3585	312	8.97436	209	12.9187	77	9.09091	200	36.5	266	13.5338	306	10.1307	283	10.6007
T1C;G25C	248	13.7097	241	14.9378	209	24.8804	241	15.3527	176	14.7727	83	20.4819	232	38.7931	229	17.4672	247	15.3846	234	14.1026
T1C;G25T	229	21.3974	240	16.6667	201	43.2836	290	22.7586	204	13.2353	88	12.5	203	53.6946	241	21.1618	285	21.7544	262	21.7557
T1C;T26A	234	22.6496	235	20.8511	504	89.2857	382	40.8377	185	25.4054	127	64.5669	445	87.4157	237	28.27	320	19.375	388	73.4536
T1C;T26C	149	18.7919	154	21.4286	330	93.0303	268	70.5224	149	32.2148	107	79.4393	278	92.446	165	36.9697	181	20.9945	264	90.9091
T1C;T26G	208	21.6346	175	22.8571	374	82.0856	297	36.3636	165	26.0606	88	57.9545	320	88.75	208	30.7692	242	23.9669	268	72.0149
T1C;T27A	196	15.3061	229	17.9039	464	86.2069	287	34.4948	177	11.8644	97	57.732	364	87.9121	233	23.176	241	18.2573	377	64.9867
T1C;T27C	126	32.5397	178	31.4607	343	95.3353	256	73.0469	106	36.7925	105	82.8571	289	94.8097	215	59.0698	192	31.25	323	91.0217
T1C;T27G	178	12.3596	175	17.7143	220	44.0909	230	20.8696	142	11.2676	57	19.2982	197	46.1929	188	16.4894	227	14.0969	188	31.383
T1C;T28A	233	18.4549	191	20.4188	425	82.8235	357	31.0924	173	13.2948	125	44	364	86.5385	255	23.5294	253	19.7628	353	59.7734
T1C;T28C	134	17.9104	151	13.245	358	81.0056	225	28.4444	159	23.2704	64	48.4375	278	80.9353	188	27.6596	151	15.2318	245	62.8571
T1C;T28G	164	28.0488	163	21.4724	205	58.5366	217	27.1889	137	27.0073	76	42.1053	166	60.8434	152	34.2105	218	29.3578	185	38.9189
T1C;T29A	213	14.0845	215	19.5349	413	84.7458	303	26.7327	173	16.763	112	35.7143	355	82.8169	222	20.2703	250	19.6	296	59.1216
T1C;T29C	204	42.1569	187	47.5936	369	94.8509	310	82.2581	194	59.7938	123	94.3089	287	91.9861	264	67.4242	266	59.3985	355	92.9577
T1C;T29G	176	16.4773	181	12.1547	275	66.5455	220	18.6364	116	17.2414	99	31.3131	220	67.2727	163	9.20245	211	11.8483	234	45.2991
T1C;C30A	197	18.7817	205	11.7073	252	71.8254	191	18.3246	151	15.2318	81	38.2716	200	80	178	14.6067	244	9.01639	199	44.7236
T1C;C30G	162	12.963	194	9.27835	209	82.7751	197	19.797	140	17.1429	70	34.2857	221	77.3756	172	15.1163	193	15.544	192	46.3542
T1C;C30T	175	22.2857	185	15.6757	381	83.4646	302	36.755	176	14.7727	105	54.2857	342	85.9649	228	23.2456	254	16.1417	291	71.8213
T1C;C31A	155	12.2581	193	12.4352	141	46.8085	250	13.6	169	8.87574	65	29.2308	119	69.7479	193	10.3627	219	13.242	147	33.3333
T1C;C31G	135	14.0741	156	14.7436	178	67.4157	197	12.1827	132	10.6061	70	42.8571	186	78.4946	158	13.2911	186	13.9785	161	44.7205
T1C;C31T	149	14.7651	165	14.5455	207	77.7778	210	24.2857	126	15.873	63	47.619	208	82.6923	215	18.1395	254	13.3858	225	64
T1C;C32A	182	18.6813	204	19.1176	373	93.5657	284	55.9859	164	10.9756	107	71.9626	288	89.9306	197	26.3959	211	17.0616	299	84.6154
T1C;C32G	135	29.6296	141	33.3333	121	89.2562	189	68.254	101	32.6733	60	85	145	88.9655	150	46.6667	178	25.8427	122	87.7049
T1C;C32T	176	18.75	219	18.2648	311	90.9968	312	45.8333	139	17.2662	94	72.3404	264	89.0152	202	25.2475	264	14.0152	271	86.3469
T1C;T33A	173	27.1676	253	22.9249	464	94.8276	320	62.1875	189	29.1005	141	78.0142	364	92.8571	244	37.7049	272	22.7941	386	87.3057
T1C;T33C	193	28.4974	205	27.8049	347	90.7781	314	57.9618	175	44.5714	112	78.5714	324	91.9753	251	49.8008	250	35.6	350	84.8571
T1C;T33G	187	40.6417	164	37.8049	207	66.6667	267	39.3258	123	34.1463	72	47.2222	202	68.3168	215	45.5814	232	40.5172	237	50.211
T1C;C34A	180	22.7778	168	17.8571	375	94.6667	300	49.6667	138	25.3623	109	80.7339	319	95.2978	216	31.0185	213	19.2488	335	93.4328
T1C;C34G	212	32.0755	244	32.377	502	96.4143	361	69.2521	200	33.5	127	85.8268	400	93.75	246	52.8455	234	35.4701	349	91.404
T1C;C34T	227	21.5859	255	22.3529	478	92.4686	387	56.3307	195	26.6667	147	70.068	375	92.2667	260	28.0769	273	20.1465	457	85.7768
T1C;T35A	218	22.9358	200	32	392	92.3469	318	61.0063	189	30.1587	122	79.5082	323	93.1889	238	34.0336	259	32.8185	292	89.726
T1C;T35C	194	20.6186	188	26.5957	490	94.0816	325	67.3846	187	41.1765	146	78.0822	364	95.6044	257	44.7471	226	34.5133	343	88.0466
T1C;T35G	158	20.2532	146	20.5479	326	92.3313	235	47.234	108	18.5185	95	67.3684	284	87.6761	205	35.6098	236	18.2203	269	80.2974
T1C;T36A	173	13.2948	173	24.8555	220	92.2727	235	60.4255	160	35.625	100	85	239	92.887	203	33.9901	223	21.0762	276	81.1594
T1C;T36C	119	5.04202	173	11.5607	141	44.6809	155	29.6774	126	11.1111	54	40.7407	120	43.3333	149	16.7785	162	16.0494	129	35.6589
T1C;T36G	131	38.1679	147	38.0952	235	89.3617	263	83.27	125	57.6	96	89.5833	219	87.2146	192	70.8333	169	44.9704	211	93.8389
T1C;T37A	175	20	185	16.2162	174	88.5057	234	51.7094	95	21.0526	86	63.9535	175	83.4286	217	36.8664	206	20.8738	223	76.2332
T1C;T37C	177	29.9435	166	36.1446	249	93.1727	232	68.9655	131	34.3511	92	79.3478	235	89.7872	158	41.1392	184	35.8696	214	78.5047
T1C;T37G	164	25	186	31.1828	313	95.8466	308	81.8182	136	36.7647	111	90.0901	259	91.8919	248	58.0645	215	33.0233	265	89.8113
T1C;C38A	145	16.5517	150	21.3333	163	83.4356	207	55.5556	122	16.3934	54	64.8148	146	87.6712	161	27.3292	180	23.3333	205	79.0244
T1C;C38G	148	18.2432	160	21.25	255	87.451	243	52.2634	133	29.3233	83	71.0843	210	90	179	37.9888	178	23.5955	213	83.5681
T1C;C38T	114	16.6667	129	13.9535	126	86.5079	198	45.9596	80	25	62	62.9032	127	89.7638	135	26.6667	139	25.8993	149	74.4966
T1C;A39C	180	30	180	29.4444	289	90.3114	340	63.8235	164	34.1463	116	67.2414	254	89.3701	232	50.431	264	28.0303	327	78.8991
T1C;A39G	213	19.2488	219	22.3744	267	83.8951	269	44.9814	170	21.1765	98	66.3265	214	88.3178	227	35.6828	254	20.4724	237	72.1519
T1C;A39T	185	19.4595	187	21.9251	291	88.6598	292	50.3425	178	24.7191	115	68.6957	248	81.8548	163	27.6074	266	24.812	253	72.7273
T1C;T40A	181	16.0221	192	15.1042	217	90.3226	308	54.2208	164	24.3902	98	81.6327	239	89.9582	193	32.6425	282	24.1135	259	86.4865
T1C;T40C	165	20.6061	159	22.0126	261	92.3372	303	61.3861	152	30.2632	100	78	221	90.9502	212	50.9434	210	20.9524	206	80.5825
T1C;T40G	155	14.1935	209	11.4833	229	81.2227	266	36.4662	150	15.3333	81	58.0247	177	89.8305	183	25.6831	209	16.2679	220	78.1818
T1C;T41A	165	22.4242	194	30.4124	297	90.2357	297	55.8923	123	39.0244	82	73.1707	230	88.6957	153	41.1765	239	32.636	259	86.4865
T1C;T41C	195	22.5641	168	22.619	223	87.4439	233	47.2103	134	28.3582	73	64.3836	187	83.9572	187	35.2941	195	30.2564	213	78.8732
T1C;T41G	149	15.4362	170	16.4706	194	64.9485	201	15.4229	146	11.6438	68	38.2353	150	75.3333	159	13.2075	245	11.4286	202	51.9802
T1C;G42A	192	17.1875	182	24.1758	226	83.6283	243	48.1481	160	18.125	91	70.3297	210	90	183	25.1366	248	22.5806	251	72.1116
T1C;G42C	189	21.6931	198	18.6869	319	87.1473	305	52.7869	160	28.125	102	71.5686	214	87.8505	251	37.8486	238	20.5882	257	80.5447
T1C;G42T	256	19.9219	255	19.6078	275	88.7273	369	55.0136	179	23.4637	121	75.2066	278	88.1295	257	35.0195	311	28.9389	316	81.6456
T1C;C43A	243	13.5802	220	13.1818	380	76.0526	307	31.2704	192	14.0625	101	48.5149	277	81.2274	202	16.3366	273	10.6227	342	63.7427
T1C;C43G	130	14.6154	193	11.399	200	37	211	16.1137	139	9.35252	69	14.4928	201	53.2338	179	13.4078	205	11.2195	186	23.1183
T1C;C43T	193	18.6528	219	26.484	222	91.4414	290	49.3103	158	24.6835	74	74.3243	179	84.9162	192	30.2083	267	28.0899	246	76.8293
T1C;G44A	241	9.54357	241	14.9378	240	20.8333	296	18.2432	176	10.2273	94	31.9149	225	44	219	8.6758	260	10	244	18.4426
T1C;G44C	196	28.5714	187	28.3422	292	90.7534	288	57.9861	153	34.6405	116	68.1034	240	87.9167	226	48.6726	248	34.6774	299	78.9298
T1C;G44T	218	17.8899	235	16.5957	253	67.9842	313	36.7412	166	20.4819	99	51.5152	247	81.3765	270	22.963	286	21.3287	264	56.8182
T1C;C45A	206	10.6796	210	8.09524	200	23	293	15.3584	170	10.5882	73	17.8082	172	29.0698	186	15.5914	229	8.73362	192	17.7083
T1C;C45G	168	12.5	184	16.3043	176	40.9091	204	23.5294	120	17.5	77	22.0779	177	64.9718	197	14.7208	185	17.2973	156	25
T1C;C45T	186	15.5914	228	22.3684	188	77.1277	251	53.3865	167	29.3413	76	73.6842	233	81.1159	236	52.9661	252	31.746	180	65.5556
T1C;G46A	207	64.2512	266	69.9248	209	91.3876	303	90.099	199	91.4573	111	93.6937	258	89.1473	302	89.7351	307	89.5765	178	90.4494
T1C;G46C	283	22.6148	260	16.1538	319	69.5925	294	33.6735	187	22.4599	115	47.8261	295	78.3051	240	27.9167	262	19.8473	340	60.5882
T1C;G46T	224	76.7857	333	77.4775	238	87.8151	287	79.4425	161	73.913	93	88.172	211	90.5213	294	82.9932	325	80	200	80
T1C;G47A	220	51.8182	248	48.7903	320	82.5	321	62.6168	183	53.5519	110	67.2727	350	82	288	67.7083	304	60.5263	294	74.4898
T1C;G47C	209	33.0144	213	45.5399	312	71.7949	287	39.7213	169	39.645	94	45.7447	230	74.7826	266	39.8496	273	36.9963	299	47.8261
T1C;G47T	315	49.5238	305	53.4426	383	78.0679	365	52.8767	192	53.125	134	60.4478	313	79.8722	249	53.8153	358	49.162	332	64.1566
T1C;G48A	223	21.5247	290	36.5517	238	50.8403	320	36.875	175	23.4286	85	43.5294	244	52.459	264	40.9091	275	31.6364	222	32.8829
T1C;G48C	175	55.4286	241	57.2614	183	59.5628	251	49.8008	168	49.4048	79	41.7722	200	74	205	55.6098	248	43.9516	210	40.4762
T1C;G48T	299	38.796	310	47.0968	285	59.2982	382	48.6911	205	44.878	92	51.087	325	74.7692	290	42.4138	353	43.3428	303	49.835
T1C;G49A	214	21.028	240	24.5833	233	33.4764	274	22.2628	178	15.7303	90	31.1111	237	46.8354	248	25.8065	241	17.0124	270	20.3704
T1C;G49C	215	12.093	211	11.8483	177	22.5989	255	14.1176	153	24.8366	86	15.1163	186	33.871	228	6.57895	254	13.3858	212	9.43396
T1C;G49T	249	11.245	263	9.12548	227	7.92952	294	11.5646	196	9.69388	100	19	211	15.1659	233	11.588	301	13.289	256	12.8906
T1C;A50C	173	13.2948	164	11.5854	149	14.094	222	15.7658	146	10.274	79	12.6582	109	21.1009	188	13.2979	243	15.2263	169	17.7515
T1C;A50G	178	31.4607	206	38.835	183	70.4918	247	36.8421	141	31.2057	81	60.4938	192	72.3958	191	28.2723	222	29.7297	166	43.3735
T1C;A50T	208	9.61538	189	12.6984	188	13.8298	269	13.3829	186	9.67742	93	19.3548	146	15.0685	211	15.1659	293	10.9215	214	13.5514
T1C;C51A	227	42.7313	212	48.1132	183	58.4699	272	46.3235	162	44.4444	81	56.7901	205	78.0488	186	50	236	51.2712	196	47.449
T1C;C51G	181	37.5691	178	37.6404	179	45.2514	214	40.1869	124	43.5484	72	27.7778	172	63.3721	212	38.2075	223	39.4619	177	37.8531
T1C;C51T	180	35	213	47.4178	203	75.8621	244	48.3607	168	45.2381	76	72.3684	205	84.3902	185	44.3243	238	45.3782	195	53.3333
T1C;G52A	189	38.6243	191	52.8796	202	73.2673	249	59.4378	188	42.0213	80	71.25	177	86.4407	210	60.4762	249	51.8072	160	65
T1C;G52C	166	37.9518	244	42.623	199	75.8794	252	54.3651	159	42.7673	77	54.5455	202	77.7228	188	43.617	234	50.8547	187	55.615
T1C;G52T	205	41.4634	206	48.0583	193	59.5855	237	55.2743	147	37.415	66	57.5758	215	79.0698	202	42.0792	250	49.6	148	42.5676
T1C;A53C	202	12.8713	193	13.9896	206	24.7573	259	12.3552	166	12.0482	70	17.1429	176	38.6364	217	14.2857	248	14.9194	232	15.9483
T1C;A53G	174	13.7931	202	11.3861	197	63.9594	270	31.1111	122	16.3934	75	30.6667	162	71.6049	175	13.1429	213	15.9624	210	47.1429
T1C;A53T	190	12.6316	177	16.3842	159	13.8365	269	11.1524	163	10.4294	79	11.3924	162	16.6667	184	10.8696	258	15.8915	202	13.8614
T1C;C54A	211	26.0664	230	27.8261	246	45.935	289	21.7993	159	20.1258	96	28.125	216	49.537	219	29.2237	241	26.971	263	29.6578
T1C;C54G	192	42.7083	205	44.3902	204	50.9804	197	39.0863	121	52.8926	80	40	189	57.1429	221	55.6561	269	44.2379	197	43.1472
T1C;C54T	206	12.1359	205	10.7317	190	14.7368	263	15.9696	180	12.2222	104	10.5769	181	16.0221	257	12.0623	254	13.7795	250	14
T1C;C55A	168	23.8095	149	29.5302	225	59.1111	215	29.3023	144	22.9167	68	36.7647	189	69.3122	186	32.7957	204	37.7451	192	42.7083
T1C;C55G	167	69.4611	194	60.8247	189	73.545	222	63.964	104	61.5385	74	75.6757	203	74.8768	163	68.0982	174	68.3908	160	62.5
T1C;C55T	204	26.9608	211	30.3318	298	84.8993	275	59.2727	158	30.3797	82	59.7561	252	88.8889	202	49.0099	238	26.8908	261	65.1341
T1C;C56A	209	24.4019	241	21.1618	240	60.4167	265	35.0943	171	21.0526	100	55	230	80.8696	207	19.3237	236	23.7288	248	36.6935
T1C;C56G	182	23.0769	160	15.625	125	56	188	17.5532	110	18.1818	61	37.7049	139	77.6978	157	14.0127	174	14.3678	168	25
T1C;C56T	200	11.5	217	15.2074	267	65.5431	264	29.1667	159	20.1258	85	48.2353	251	80.0797	210	25.7143	228	16.2281	256	47.6562
T1C;T57A	156	10.8974	173	17.341	198	51.5152	211	30.8057	146	15.7534	78	41.0256	205	63.9024	205	32.1951	274	15.6934	236	54.661
T1C;T57C	176	17.6136	247	19.0283	162	90.7407	242	47.9339	154	14.9351	63	77.7778	176	90.9091	215	32.093	249	15.261	157	87.2611
T1C;T57G	175	17.7143	181	18.7845	149	48.3221	187	33.6898	121	18.1818	65	35.3846	177	62.7119	158	33.5443	220	13.6364	175	43.4286
T1C;G58A	212	34.9057	239	38.4937	323	91.3313	293	72.0137	137	36.4964	114	80.7018	299	89.2977	256	64.8438	252	44.8413	285	86.3158
T1C;G58C	162	33.9506	195	48.7179	275	90.9091	266	75.9398	129	44.9612	90	81.1111	211	89.0995	192	61.4583	229	43.2314	213	77.4648
T1C;G58T	253	35.5731	234	31.6239	416	86.5385	380	55.5263	181	36.4641	144	70.8333	351	88.604	292	47.2603	293	35.1536	305	68.5246
T1C;C59A	152	38.1579	198	25.7576	339	93.5103	245	73.8776	146	42.4658	99	83.8384	260	94.6154	189	53.9683	204	44.1176	216	91.2037
T1C;C59G	154	18.8312	184	25	141	80.8511	217	58.0645	105	29.5238	87	85.0575	165	84.2424	149	44.2953	174	29.3103	151	86.0927
T1C;C59T	177	29.3785	197	32.4873	266	95.4887	320	77.8125	138	51.4493	116	86.2069	249	93.5743	266	64.6617	286	46.1538	216	93.0556
T1C;A60C	166	19.8795	202	17.3267	245	82.449	271	39.1144	155	23.871	97	46.3918	246	85.7724	187	34.7594	248	22.1774	233	69.5279
T1C;A60G	187	15.508	177	24.8588	196	82.6531	204	51.4706	128	20.3125	67	82.0896	174	82.1839	176	34.6591	227	25.1101	140	76.4286
T1C;A60T	185	8.10811	171	8.18713	243	60.0823	261	19.1571	148	14.1892	82	25.6098	208	64.4231	202	16.8317	233	11.588	252	41.2698
T1C;G61A	192	22.3958	257	29.572	206	84.466	277	66.065	188	40.4255	94	82.9787	231	87.4459	254	49.6063	247	38.4615	196	78.0612
T1C;G61C	223	18.8341	223	26.4574	385	88.5714	395	69.6203	211	46.9194	137	81.7518	309	89.3204	276	54.3478	251	40.6375	324	83.9506
T1C;G61T	259	25.0965	285	30.8772	355	91.831	359	59.61	194	34.5361	131	82.4427	285	90.1754	270	44.4444	352	37.2159	299	82.6087
T1C;A62C	156	41.0256	176	44.8864	374	97.0588	321	86.2928	191	46.5969	114	91.2281	289	96.5398	240	71.6667	213	46.0094	317	93.3754
T1C;A62G	151	43.0464	203	43.3498	205	81.9512	236	68.6441	137	63.5036	94	81.9149	184	89.6739	196	52.0408	220	55.9091	255	81.9608
T1C;A62T	167	16.1677	226	26.1062	300	83.3333	301	49.1694	167	35.9281	108	62.963	226	84.9558	234	37.6068	219	34.7032	275	71.6364
T1C;G63A	242	15.2893	259	19.6911	470	83.8298	358	22.067	213	11.2676	110	43.6364	332	84.0361	273	19.0476	303	16.1716	341	64.5161
T1C;G63C	209	11.4833	244	13.9344	478	82.636	330	25.4545	194	14.433	119	48.7395	339	85.8407	203	25.1232	282	13.8298	385	71.6883
T1C;G63T	281	11.7438	292	10.9589	870	96.6667	500	69.8	241	19.0871	213	81.2207	647	95.6723	360	35	360	20.2778	634	93.0599
T1C;A64C	166	15.6627	175	15.4286	321	79.7508	248	39.9194	122	12.2951	82	57.3171	265	84.5283	176	25.5682	228	10.9649	250	68.4
T1C;A64G	155	36.129	173	31.7919	270	93.3333	277	74.3682	139	48.9209	99	86.8687	222	92.7928	188	58.5106	180	43.8889	273	91.5751
T1C;A64T	184	14.6739	190	10.5263	409	92.665	298	47.651	126	23.8095	114	82.4561	319	90.9091	213	31.9249	229	16.1572	330	80.6061
T1C;G65A	200	42	274	50	559	95.8855	502	95.4183	305	82.623	201	97.0149	445	97.0787	468	90.1709	402	70.398	509	97.053
T1C;G65C	118	19.4915	118	27.1186	267	97.3783	318	87.7358	125	72	111	98.1982	263	98.0989	310	95.1613	178	38.2022	281	95.3737
T1C;G65T	170	38.8235	231	48.0519	384	97.3958	393	92.3664	209	86.1244	150	96	324	96.2963	346	94.5087	309	75.7282	325	96
T1C;G66A	173	68.2081	253	76.6798	281	94.6619	275	93.0909	178	92.6966	106	95.283	266	94.7368	280	93.5714	312	89.4231	226	94.2478
T1C;G66C	130	12.3077	163	19.0184	295	93.8983	338	92.8994	141	52.4823	120	93.3333	279	94.2652	295	83.3898	194	30.9278	268	92.9104
T1C;G66T	228	84.6491	312	89.1026	321	95.6386	337	97.0326	211	93.3649	117	96.5812	230	95.2174	293	96.2457	334	91.018	250	97.2
T1C;C67A	178	78.0899	193	74.6114	161	98.1366	245	93.8776	160	83.75	107	90.6542	199	96.9849	196	93.8776	241	85.4772	145	82.7586
T1C;C67G	193	21.2435	198	29.798	113	85.8407	193	77.2021	136	25	68	79.4118	142	90.8451	171	57.8947	181	28.7293	102	82.3529
T1C;C67T	187	61.4973	195	53.8462	123	94.3089	213	89.6714	128	74.2188	73	87.6712	155	93.5484	145	86.2069	195	67.6923	121	91.7355
T1C;T68A	188	78.1915	208	79.3269	160	98.125	253	95.2569	147	89.1156	76	94.7368	164	97.561	158	91.7722	229	86.8996	138	97.1014
T1C;T68C	168	51.7857	205	74.6341	158	96.8354	258	91.0853	129	77.5194	78	87.1795	191	95.288	190	88.9474	223	79.3722	151	94.702
T1C;T68G	186	11.828	163	16.5644	101	89.1089	182	71.978	129	20.9302	39	76.9231	125	88	193	36.7876	182	24.7253	84	83.3333
T1C;G69A	305	87.8689	346	90.1734	362	98.3425	349	96.2751	231	91.7749	151	97.351	272	96.3235	336	96.7262	415	92.7711	289	96.1938
T1C;G69C	224	93.3036	249	91.5663	275	98.9091	287	95.4704	165	96.3636	105	97.1429	232	96.9828	281	97.153	307	96.7427	212	98.5849
T1C;G69T	200	90	244	93.0328	250	98	297	98.6532	172	98.2558	94	95.7447	221	96.8326	274	98.1752	274	95.2555	254	97.2441
T1C;A70C	158	80.3797	198	81.3131	241	98.3402	273	97.4359	129	93.0233	76	96.0526	216	97.2222	260	96.5385	212	91.5094	205	97.0732
T1C;A70G	159	30.8176	159	41.5094	217	96.3134	258	82.5581	132	40.9091	85	96.4706	225	93.7778	198	56.5657	210	35.7143	213	89.2019
T1C;A70T	194	59.2784	207	59.9034	344	97.093	298	92.2819	156	62.1795	100	98	270	98.1481	216	81.0185	244	62.7049	269	97.026
T1C;A71C	231	35.0649	225	40.4444	438	96.8037	478	86.8201	176	48.8636	144	91.6667	410	97.0732	296	69.5946	288	47.2222	369	94.8509
T1C;A71G	183	40.4372	214	38.785	393	98.2188	412	87.1359	181	56.9061	137	90.5109	341	98.5337	267	68.5393	279	44.4444	410	96.0976
T1C;A71T	170	22.9412	199	23.6181	373	94.6381	331	77.9456	172	42.4419	126	86.5079	324	92.9012	226	65.9292	230	27.3913	382	91.0995
T1C;A72C	188	13.2979	194	24.7423	398	89.9497	265	54.3396	165	32.1212	109	66.9725	355	89.8592	253	41.1067	232	24.569	334	85.0299
T1C;A72G	198	9.09091	153	13.0719	297	67.3401	202	28.2178	136	16.9118	94	42.5532	251	77.2908	185	22.7027	184	13.0435	234	47.8632
T1C;A72T	177	26.5537	214	25.2336	433	95.3811	324	57.716	168	33.3333	115	80	344	96.8023	197	38.0711	218	31.6514	323	88.8545
T1G;T2A	205	24.878	225	23.5556	303	89.1089	325	59.0769	193	39.3782	112	77.6786	344	89.5349	248	39.9194	324	28.0864	312	82.3718
T1G;T2C	158	35.443	189	33.8624	163	88.3436	233	52.7897	124	30.6452	70	72.8571	173	83.815	162	48.7654	213	36.1502	160	80
T1G;T2G	142	11.2676	144	11.8056	160	66.25	207	20.7729	150	20	66	33.3333	149	65.1007	160	30.625	204	21.5686	163	50.3067
T1G;T3A	207	51.2077	302	71.5232	210	89.0476	272	80.1471	157	66.879	106	82.0755	199	89.4472	276	68.1159	288	72.9167	218	83.4862
T1G;T3C	155	88.3871	233	87.1245	108	83.3333	204	90.1961	177	92.0904	69	88.4058	103	81.5534	235	95.3191	269	94.7955	109	88.0734
T1G;T3G	244	61.8852	346	80.0578	284	88.7324	303	77.8878	172	59.8837	136	84.5588	261	93.4866	231	81.8182	316	74.3671	278	88.4892
T1G;C4A	297	85.1852	395	87.8481	319	93.4169	421	91.4489	276	91.3043	183	90.1639	283	91.8728	408	90.9314	517	90.9091	319	93.1034
T1G;C4G	387	87.0801	483	88.8199	351	89.1738	401	89.2768	302	87.4172	147	93.8776	316	88.6076	463	89.4168	508	90.748	360	85.2778
T1G;C4T	356	55.3371	519	58.3815	417	79.1367	526	54.3726	361	56.7867	170	66.4706	401	81.0474	446	62.3318	573	60.3839	428	69.8598
T1G;A5C	127	88.189	177	90.9605	119	89.0756	191	90.0524	120	85.8333	51	94.1176	124	87.9032	176	92.6136	161	86.9565	142	87.3239
T1G;A5G	102	63.7255	202	77.7228	84	61.9048	138	71.7391	95	65.2632	66	63.6364	96	73.9583	137	76.6423	164	75	98	50
T1G;A5T	40	2.5	40	25	19	42.1053	30	50	27	55.5556	7	42.8571	12	66.6667	23	39.1304	50	40	15	60
T1G;G6A	376	89.8936	554	91.6968	356	93.2584	456	93.4211	323	91.6409	150	97.3333	274	90.8759	493	94.929	545	94.4954	336	93.1548
T1G;G6C	270	88.5185	354	92.0904	238	90.3361	287	93.0314	281	94.6619	121	90.9091	199	85.9296	332	90.9639	435	96.3218	260	85.3846
T1G;G6T	296	86.8243	417	91.1271	326	88.3436	334	90.7186	205	88.2927	144	87.5	274	88.3212	421	93.5867	424	88.6792	311	93.5691
T1G;C7A	279	82.7957	315	84.7619	363	88.4298	364	81.3187	167	85.0299	100	89	261	89.272	336	90.1786	375	86.9333	331	83.6858
T1G;C7G	184	86.413	283	87.6325	215	88.8372	245	88.1633	169	81.6568	101	95.0495	211	92.891	215	91.6279	259	85.7143	250	89.2
T1G;C7T	263	71.1027	368	80.163	416	91.8269	358	86.0335	190	76.3158	115	87.8261	299	89.6321	371	86.5229	356	77.5281	349	83.6676
T1G;C8A	347	83.5735	491	89.8167	490	95.102	445	91.236	279	84.9462	150	91.3333	378	89.9471	520	89.2308	503	89.2644	436	90.5963
T1G;C8G	175	84.5714	256	92.5781	264	94.697	242	85.9504	122	86.8852	91	92.3077	220	93.1818	256	93.3594	232	87.5	217	91.2442
T1G;C8T	270	72.5926	463	81.8575	411	93.674	415	84.0964	251	78.0876	149	90.604	365	92.8767	467	87.3662	493	83.3671	411	92.944
T1G;G9A	295	17.9661	298	19.1275	275	38.1818	308	18.1818	198	13.6364	116	25.8621	266	61.2782	345	17.6812	373	22.252	266	25.188
T1G;G9C	217	19.8157	232	21.5517	187	22.9947	262	19.084	216	15.7407	90	21.1111	201	31.3433	206	19.4175	308	16.8831	211	9.00474
T1G;G9T	187	7.48663	193	12.4352	136	20.5882	256	12.5	182	9.34066	88	13.6364	119	36.1345	193	7.25389	268	13.806	167	12.5749
T1G;G10A	297	35.6902	398	43.9698	336	66.369	420	48.0952	251	43.4263	134	67.1642	327	75.5352	379	51.1873	406	41.3793	330	53.3333
T1G;G10C	195	69.2308	288	73.9583	183	58.4699	308	71.7532	181	74.0331	108	68.5185	186	69.3548	274	80.292	316	71.2025	226	69.0265
T1G;G10T	233	25.3219	257	29.1829	176	32.3864	290	23.4483	180	26.6667	80	26.25	185	55.1351	236	27.9661	329	30.0912	202	21.7822
T1G;A11C	148	47.973	195	57.4359	124	36.2903	199	54.7739	125	53.6	55	56.3636	125	52	167	57.485	243	49.3827	145	41.3793
T1G;A11G	216	70.8333	261	68.9655	231	91.342	314	79.6178	151	66.2252	73	86.3014	217	81.5668	258	81.0078	245	71.0204	258	91.4729
T1G;A11T	173	12.1387	170	20.5882	115	22.6087	162	20.9877	142	21.831	60	23.3333	101	39.604	152	17.7632	211	23.2227	153	23.5294
T1G;A12C	146	13.0137	183	7.65027	138	17.3913	162	14.8148	144	25	59	18.6441	126	24.6032	162	12.963	173	14.4509	164	10.3659
T1G;A12G	155	31.6129	213	41.3146	165	73.9394	196	42.3469	125	31.2	73	52.0548	140	74.2857	157	45.8599	225	36.8889	159	61.6352
T1G;A12T	200	15	200	11	170	11.7647	277	18.0505	208	12.0192	79	15.1899	159	19.4969	202	9.90099	285	12.9825	207	11.1111
T1G;G13A	265	71.6981	392	84.1837	304	86.1842	347	88.4726	230	80	124	83.871	267	89.1386	343	88.0466	403	83.871	260	85
T1G;G13C	153	44.4444	201	57.2139	109	61.4679	165	58.7879	101	44.5545	40	60	126	71.4286	183	38.2514	188	53.1915	109	58.7156
T1G;G13T	156	62.1795	248	63.7097	129	67.4419	184	67.9348	124	56.4516	49	71.4286	138	78.2609	170	68.8235	214	60.2804	142	62.6761
T1G;C14A	308	89.2857	391	92.5831	188	78.7234	434	91.4747	290	94.4828	126	90.4762	202	81.6832	394	90.3553	469	92.1109	276	89.1304
T1G;C14G	262	89.313	340	90.2941	130	63.8462	339	91.1504	242	93.3884	96	96.875	154	72.7273	329	95.1368	429	91.3753	262	91.2214
T1G;C14T	235	74.4681	361	84.4875	141	48.9362	245	69.7959	194	68.0412	95	80	155	66.4516	338	84.9112	371	81.1321	164	51.8293
T1G;G15A	200	18	246	15.8537	194	13.4021	305	14.7541	217	13.3641	86	9.30233	195	20.5128	235	11.0638	329	14.5897	209	8.13397
T1G;G15C	142	60.5634	163	57.0552	155	69.0323	222	67.5676	125	60.8	64	71.875	175	65.7143	170	68.8235	185	64.8649	140	59.2857
T1G;G15T	177	40.113	208	37.9808	212	50	225	38.2222	134	41.791	73	41.0959	199	61.809	201	39.3035	224	45.9821	248	35.8871
T1G;G16A	181	11.0497	174	12.6437	166	7.83133	213	5.6338	131	8.39695	60	10	150	21.3333	179	13.9665	212	9.90566	210	5.71429
T1G;G16C	236	74.1525	226	67.2566	103	52.4272	222	68.4685	206	82.0388	67	70.1493	115	65.2174	170	73.5294	343	79.3003	116	52.5862
T1G;G16T	210	39.5238	197	38.5787	153	28.7582	214	33.6449	199	54.7739	64	37.5	155	45.8065	162	38.8889	307	63.5179	183	26.776
T1G;G17A	216	55.0926	255	61.5686	204	54.4118	281	52.3132	152	58.5526	87	57.4713	205	69.7561	209	65.5502	279	60.5735	183	54.6448
T1G;G17C	187	85.0267	231	81.8182	193	87.0466	226	83.6283	138	82.6087	112	90.1786	190	88.4211	222	86.4865	233	84.1202	193	86.5285
T1G;G17T	162	54.321	212	62.2642	162	66.6667	235	53.617	128	57.8125	56	64.2857	151	69.5364	201	60.6965	217	65.4378	154	54.5455
T1G;A18C	141	20.5674	146	19.1781	171	19.883	223	16.1435	140	10	77	12.987	140	24.2857	180	16.6667	202	18.8119	185	13.5135
T1G;A18G	239	20.9205	253	18.5771	230	23.4783	276	28.2609	155	16.7742	86	24.4186	205	28.2927	236	26.6949	276	23.1884	252	23.4127
T1G;A18T	127	9.44882	122	16.3934	115	16.5217	124	8.87097	71	11.2676	36	13.8889	90	17.7778	128	12.5	149	9.39597	111	14.4144
T1G;C19A	245	81.2245	354	83.8983	232	76.2931	375	84.8	205	79.5122	120	78.3333	230	83.0435	340	86.7647	372	79.5699	310	85.1613
T1G;C19G	168	55.3571	248	62.0968	141	58.8652	221	56.5611	124	55.6452	74	55.4054	184	59.2391	226	64.6018	264	60.6061	184	54.8913
T1G;C19T	129	41.8605	163	68.0982	137	41.6058	174	52.2989	98	53.0612	71	47.8873	136	58.8235	151	58.2781	184	61.9565	117	35.0427
T1G;G20A	337	75.6677	455	86.8132	408	85.7843	447	87.0246	304	87.1711	177	85.3107	362	87.5691	457	86.2144	494	87.247	370	81.8919
T1G;G20C	293	54.6075	365	61.3699	277	54.5126	363	59.5041	250	62	108	62.963	227	53.304	337	62.0178	377	57.8249	348	53.4483
T1G;G20T	374	74.0642	468	80.1282	511	81.6047	514	80.7393	321	74.7664	161	83.2298	394	84.264	461	83.731	508	79.1339	451	81.153
T1G;A21C	213	14.554	223	19.2825	191	22.5131	241	14.9378	149	8.72483	73	16.4384	161	24.2236	211	15.1659	252	13.0952	210	12.381
T1G;A21G	232	52.1552	281	55.8719	318	87.1069	335	62.9851	161	52.1739	110	69.0909	267	85.0187	263	63.1179	308	56.8182	250	76
T1G;A21T	188	20.7447	203	14.2857	203	23.1527	231	18.6147	153	9.80392	76	13.1579	158	30.3797	218	17.4312	253	19.3676	214	21.4953
T1G;C22A	195	60	268	77.6119	200	65.5	256	65.625	146	71.2329	94	59.5745	221	61.086	239	76.569	280	66.7857	203	62.5616
T1G;C22G	95	58.9474	220	70.9091	100	35	139	46.0432	72	41.6667	55	56.3636	83	42.1687	145	66.2069	163	62.5767	95	44.2105
T1G;C22T	227	58.5903	268	68.2836	153	46.4052	244	65.1639	149	68.4564	97	65.9794	161	47.205	272	75.3676	289	69.5502	193	54.4041
T1G;C23A	174	65.5172	294	77.8912	115	40.8696	178	65.7303	105	59.0476	59	74.5763	138	55.7971	253	81.8182	260	70.3846	123	54.4715
T1G;C23G	85	47.0588	126	65.873	75	58.6667	126	72.2222	58	72.4138	31	74.1935	107	68.2243	82	71.9512	86	63.9535	58	55.1724
T1G;C23T	163	46.6258	220	58.1818	128	24.2188	191	58.1152	117	63.2479	66	59.0909	142	30.2817	217	65.8986	237	64.135	165	39.3939
T1G;C24A	172	66.8605	338	83.1361	128	67.1875	206	76.699	121	73.5537	75	82.6667	145	71.0345	295	88.1356	282	83.6879	121	70.2479
T1G;C24G	245	75.5102	348	87.3563	320	86.875	324	84.2593	188	87.766	100	80	252	82.9365	354	88.9831	310	85.8065	289	86.1592
T1G;C24T	166	77.1084	341	78.2991	169	65.0888	231	71.8615	137	62.7737	108	75.9259	188	71.8085	320	87.8125	274	81.3869	152	66.4474
T1G;G25A	189	26.455	239	41.841	168	29.7619	235	30.2128	153	37.9085	70	40	168	41.0714	205	42.439	281	43.4164	180	24.4444
T1G;G25C	265	21.1321	276	26.087	262	26.7176	352	23.0114	226	21.6814	108	24.0741	228	46.4912	275	29.8182	339	25.3687	250	22.8
T1G;G25T	254	43.3071	331	50.7553	227	44.0529	306	50	210	36.6667	82	37.8049	209	61.7225	284	50.7042	293	51.1945	238	36.5546
T1G;T26A	349	45.8453	374	49.4652	474	75.3165	408	54.4118	286	39.8601	126	61.9048	347	77.2334	349	52.4355	412	47.0874	384	59.1146
T1G;T26C	213	49.7653	285	52.9825	461	92.6247	309	64.7249	213	58.6854	115	80	338	89.645	284	63.0282	297	57.5758	353	88.102
T1G;T26G	259	50.9653	285	58.2456	348	78.7356	362	58.011	201	56.7164	100	61	274	77.3723	305	66.8852	352	63.9205	344	67.4419
T1G;T27A	280	33.2143	329	33.7386	448	77.0089	354	37.8531	225	29.7778	124	41.9355	358	77.3743	322	34.472	336	29.4643	359	52.6462
T1G;T27C	151	36.4238	191	57.5916	225	86.2222	227	60.3524	121	50.4132	75	80	211	76.7773	163	57.6687	222	57.2072	206	74.7573
T1G;T27G	188	23.9362	224	25.8929	235	31.4894	251	22.7092	166	25.3012	71	26.7606	235	42.5532	228	34.6491	289	31.1419	233	29.6137
T1G;T28A	278	30.9353	335	39.1045	456	72.5877	318	37.1069	227	40.0881	111	44.1441	362	77.9006	326	43.5583	407	37.8378	350	53.4286
T1G;T28C	171	40.3509	199	42.7136	200	63.5	216	41.2037	166	31.3253	73	35.6164	212	58.0189	210	53.3333	228	39.9123	195	45.1282
T1G;T28G	185	76.2162	277	82.3105	248	83.4677	268	81.7164	177	78.5311	77	81.8182	211	75.8294	315	85.7143	276	85.1449	262	83.2061
T1G;T29A	249	27.3092	293	25.5973	447	70.2461	331	26.5861	189	27.5132	98	28.5714	332	72.5904	281	25.6228	307	20.5212	326	49.6933
T1G;T29C	259	62.5483	277	65.343	369	89.1599	352	69.0341	196	66.8367	131	82.4427	304	90.1316	281	76.8683	305	68.8525	364	83.2418
T1G;T29G	209	18.6603	193	17.0984	227	40.9692	239	26.7782	127	21.2598	80	20	181	40.884	182	15.3846	244	15.5738	223	28.2511
T1G;C30A	229	15.2838	213	25.3521	284	59.1549	239	16.7364	190	16.8421	96	31.25	223	67.2646	239	20.9205	270	16.6667	229	36.6812
T1G;C30G	164	12.1951	190	18.9474	162	35.1852	213	15.493	133	13.5338	67	7.46269	153	42.4837	153	16.9935	213	16.4319	192	18.2292
T1G;C30T	272	23.8971	280	29.2857	385	75.8442	390	31.2821	209	19.6172	97	47.4227	340	76.7647	312	28.8462	367	27.5204	373	51.2064
T1G;C31A	171	14.6199	222	13.0631	143	42.6573	201	14.4279	159	11.3208	69	18.8406	118	62.7119	169	16.568	243	13.9918	151	24.5033
T1G;C31G	129	15.5039	167	19.7605	224	75	211	25.5924	120	16.6667	64	29.6875	203	73.8916	156	23.7179	196	22.9592	214	53.271
T1G;C31T	232	25.431	215	22.7907	279	72.043	246	28.4553	172	20.3488	88	39.7727	237	76.3713	218	28.4404	243	19.3416	257	42.8016
T1G;C32A	194	22.6804	229	28.3843	267	81.6479	266	43.985	185	31.8919	104	73.0769	240	81.6667	225	37.3333	286	30.4196	266	76.6917
T1G;C32G	136	50.7353	199	65.8291	183	93.9891	204	73.0392	105	58.0952	60	86.6667	176	94.3182	192	67.1875	177	59.322	149	89.2617
T1G;C32T	238	29.8319	236	31.7797	379	86.8074	284	46.1268	202	25.7426	131	58.7786	236	85.1695	246	37.8049	325	26.4615	331	74.3202
T1G;T33A	258	30.6202	328	45.7317	444	87.1622	404	50.495	226	40.708	112	64.2857	402	87.0647	304	51.6447	373	49.5979	348	71.8391
T1G;T33C	274	72.2628	330	74.2424	458	83.8428	447	77.1812	270	74.8148	171	81.8713	340	89.7059	348	78.4483	408	71.8137	335	81.194
T1G;T33G	297	82.1549	398	88.6935	377	86.4721	397	89.4207	277	89.1697	133	91.7293	275	84.7273	432	92.1296	401	89.7756	400	88.25
T1G;C34A	235	33.1915	253	36.7589	495	88.4848	340	50.5882	174	37.3563	136	74.2647	428	88.0841	251	41.0359	313	35.1438	389	78.4062
T1G;C34G	397	63.2242	459	67.756	752	89.8936	518	69.112	311	66.2379	198	79.2929	528	89.9621	488	73.5656	464	66.5948	618	85.7605
T1G;C34T	339	34.5133	320	35.3125	623	88.764	430	43.9535	244	29.918	158	62.6582	472	89.8305	318	33.6478	356	33.427	485	74.8454
T1G;T35A	265	35.8491	309	33.3333	504	87.1032	379	52.5066	215	40.4651	116	69.8276	398	86.6834	295	44.7458	338	43.1953	408	73.2843
T1G;T35C	188	54.2553	243	65.0206	297	82.4916	242	57.8512	167	57.485	99	70.7071	273	81.685	232	68.5345	274	61.6788	287	71.0801
T1G;T35G	309	70.8738	406	77.5862	426	84.9765	431	78.1903	253	76.6798	116	81.8966	328	79.2683	387	80.6202	442	80.9955	342	73.6842
T1G;T36A	189	45.5026	218	34.8624	364	85.4396	301	52.1595	157	39.4904	102	56.8627	311	84.8875	236	47.0339	264	40.9091	277	74.3682
T1G;T36C	113	14.1593	171	32.1637	120	35.8333	157	20.3822	92	15.2174	53	35.8491	127	41.7323	136	27.2059	162	16.6667	113	22.1239
T1G;T36G	123	47.1545	172	55.814	217	89.8618	195	78.9744	103	44.6602	75	85.3333	206	85.9223	175	62.2857	167	46.7066	168	84.5238
T1G;T37A	196	31.6327	219	34.2466	265	84.9057	281	45.9075	151	33.7748	93	53.7634	256	83.5938	242	42.562	235	36.1702	223	69.9552
T1G;T37C	180	74.4444	282	84.3972	233	89.6996	333	78.0781	171	80.117	102	95.098	220	87.2727	287	90.5923	312	83.9744	287	85.3659
T1G;T37G	148	56.7568	192	68.75	190	83.6842	190	59.4737	112	61.6071	81	75.3086	190	76.3158	190	73.1579	184	54.3478	174	70.1149
T1G;C38A	187	27.8075	253	39.5257	199	74.8744	175	40	139	26.6187	54	53.7037	190	81.0526	207	37.1981	194	36.0825	203	63.0542
T1G;C38G	176	26.7045	239	33.8912	311	81.0289	259	47.1042	151	36.4238	97	68.0412	285	88.4211	227	39.6476	242	41.7355	259	70.2703
T1G;C38T	125	33.6	193	21.7617	172	72.6744	203	30.0493	122	27.0492	69	44.9275	169	78.1065	166	33.7349	203	27.0936	181	60.221
T1G;A39C	160	53.75	227	54.6256	239	79.9163	259	57.529	123	43.9024	88	73.8636	249	87.9518	224	55.8036	242	53.719	222	80.1802
T1G;A39G	318	56.6038	367	66.485	298	77.8523	409	64.5477	268	55.9701	153	73.8562	279	78.853	395	67.8481	454	65.6388	292	74.3151
T1G;A39T	234	33.7607	221	40.724	331	71.9033	296	35.473	196	35.2041	90	48.8889	265	77.7358	230	37.8261	258	34.8837	330	58.4848
T1G;T40A	259	28.1853	246	42.2764	303	78.8779	305	39.0164	180	32.2222	101	53.4653	267	81.2734	262	47.3282	277	37.5451	295	56.6102
T1G;T40C	199	36.6834	202	42.5743	331	90.0302	279	48.3871	164	29.878	111	82.8829	303	84.8185	240	43.75	238	43.2773	250	72.8
T1G;T40G	227	36.5639	276	46.0145	296	74.6622	298	43.9597	188	37.766	84	50	256	83.9844	237	49.789	294	45.9184	290	67.931
T1G;T41A	249	39.3574	279	51.2545	366	84.6995	297	48.1481	183	45.3552	103	62.1359	276	82.971	258	58.5271	257	48.6381	281	66.1922
T1G;T41C	202	45.0495	251	43.8247	270	83.3333	228	49.5614	150	39.3333	83	53.012	210	76.1905	230	52.1739	277	49.0975	270	62.963
T1G;T41G	199	38.6935	236	42.7966	249	56.6265	316	43.3544	163	36.1963	84	46.4286	227	63.4361	252	46.4286	277	46.2094	246	46.3415
T1G;G42A	186	32.7957	271	38.3764	271	73.8007	303	34.3234	181	26.5193	104	62.5	260	78.4615	246	36.1789	311	30.8682	275	58.5455
T1G;G42C	244	42.2131	277	43.3213	337	80.7122	332	50.6024	184	35.3261	95	56.8421	279	78.4946	264	39.0152	292	47.9452	295	68.1356
T1G;G42T	289	28.3737	375	31.4667	384	75.2604	371	41.779	215	39.5349	117	56.4103	305	81.3115	306	39.5425	363	37.1901	338	62.7219
T1G;C43A	262	22.9008	272	28.6765	281	58.0071	351	27.3504	200	22	107	34.5794	247	58.7045	247	21.8623	294	28.2313	280	36.4286
T1G;C43G	212	25.4717	191	18.8482	187	32.0856	229	24.0175	168	24.4048	56	16.0714	170	43.5294	175	17.1429	209	19.6172	243	20.5761
T1G;C43T	242	24.7934	267	35.206	243	78.1893	291	38.8316	178	28.6517	89	52.809	229	80.3493	265	36.9811	316	31.962	241	61.4108
T1G;G44A	237	21.9409	269	21.9331	246	21.5447	323	21.9814	186	23.6559	83	18.0723	208	32.2115	255	27.8431	296	30.0676	284	15.493
T1G;G44C	358	79.8883	458	87.5546	420	83.8095	479	87.0564	312	87.1795	180	90	322	88.1988	505	88.5149	517	92.2631	411	86.8613
T1G;G44T	317	57.4132	395	67.0886	342	65.7895	399	61.4035	260	66.5385	159	69.1824	283	73.1449	447	64.6532	496	67.1371	327	56.5749
T1G;C45A	290	48.6207	329	49.2401	263	52.0913	376	53.9894	209	54.067	99	56.5657	221	64.7059	329	58.0547	339	47.7876	299	50.5017
T1G;C45G	185	35.6757	213	35.2113	180	31.6667	229	31.0044	137	34.3066	66	39.3939	163	48.4663	183	36.0656	241	40.249	178	34.2697
T1G;C45T	219	52.968	302	65.5629	242	66.1157	326	66.5644	201	56.7164	108	70.3704	251	73.3068	284	68.3099	315	69.8413	240	49.5833
T1G;G46A	185	49.1892	263	60.8365	214	83.1776	272	86.3971	187	73.7968	99	88.8889	221	87.7828	248	82.6613	291	71.8213	213	87.3239
T1G;G46C	473	86.2579	624	87.3397	427	79.3911	644	84.9379	421	85.9857	214	87.8505	386	84.456	576	89.5833	656	87.0427	527	82.5427
T1G;G46T	202	80.198	306	93.1373	261	81.2261	325	87.6923	166	87.3494	89	95.5056	265	89.0566	296	94.2568	366	87.9781	267	89.1386
T1G;G47A	260	84.2308	323	85.1393	291	78.0069	337	92.2849	198	82.8283	115	86.087	262	80.1527	343	91.8367	384	89.5833	288	78.125
T1G;G47C	263	85.1711	369	85.9079	286	85.6643	337	89.6142	184	91.8478	130	91.5385	246	88.2114	355	91.5493	415	90.3614	301	84.3854
T1G;G47T	265	83.7736	389	86.1183	278	76.259	353	84.7025	253	84.9802	121	92.562	287	81.1847	392	90.051	403	86.6005	273	85.348
T1G;G48A	236	80.9322	369	84.2818	237	71.308	295	79.661	194	72.6804	112	75	248	72.9839	350	88.8571	368	77.7174	284	77.4648
T1G;G48C	273	88.2784	407	93.3661	291	85.2234	366	91.8033	251	90.8367	141	95.7447	266	86.0902	436	94.7248	423	92.9078	335	88.9552
T1G;G48T	430	92.5581	620	92.5806	399	84.7118	544	91.9118	378	92.328	205	93.6585	353	85.2691	585	95.8974	586	92.4915	417	90.4077
T1G;G49A	311	48.8746	386	59.8446	352	63.9205	446	56.5022	240	54.5833	134	61.194	288	66.6667	418	62.6794	484	59.5041	358	60.8939
T1G;G49C	291	74.2268	353	72.8045	373	72.118	407	75.1843	281	78.2918	167	77.2455	291	75.6014	412	82.0388	460	83.0435	361	67.313
T1G;G49T	291	24.3986	319	30.721	302	25.1656	327	28.7462	222	28.8288	110	28.1818	256	31.25	303	34.6535	381	23.622	345	31.8841
T1G;A50C	199	47.7387	270	58.5185	159	43.3962	250	45.2	170	52.9412	74	58.1081	172	54.0698	245	61.6327	302	53.3113	192	46.875
T1G;A50G	152	51.9737	242	60.3306	166	59.6386	237	49.3671	129	54.2636	70	52.8571	165	73.3333	202	57.9208	234	61.1111	178	48.3146
T1G;A50T	224	17.8571	234	17.9487	191	16.2304	280	18.5714	179	11.7318	81	19.7531	207	24.1546	240	16.25	258	16.2791	265	15.0943
T1G;C51A	225	64.4444	383	77.2846	288	78.4722	323	73.9938	218	77.0642	126	83.3333	227	77.9736	333	80.7808	357	77.3109	276	69.9275
T1G;C51G	230	78.2609	376	86.1702	264	77.6515	331	79.4562	168	86.3095	133	75.188	195	74.8718	395	89.1139	334	84.7305	308	78.2468
T1G;C51T	254	68.1102	341	80.3519	218	61.4679	337	72.4036	188	75.5319	104	75.9615	231	82.684	328	78.3537	362	76.7956	236	70.339
T1G;G52A	208	67.7885	311	84.8875	201	72.6368	293	77.8157	189	75.1323	84	83.3333	203	72.4138	279	84.5878	289	78.5467	213	66.6667
T1G;G52C	154	35.7143	243	48.5597	173	39.8844	191	40.3141	115	31.3043	77	40.2597	171	56.7251	174	44.2529	231	44.5887	166	35.5422
T1G;G52T	181	52.4862	217	62.212	197	56.3452	238	53.7815	144	52.0833	71	57.7465	197	66.4975	203	66.0099	262	59.542	197	49.7462
T1G;A53C	224	11.1607	233	14.5923	197	22.8426	234	16.2393	198	17.1717	74	13.5135	214	33.6449	246	13.4146	283	14.841	227	16.2996
T1G;A53G	227	17.1806	231	19.9134	254	54.7244	264	20.4545	147	15.6463	79	26.5823	190	55.7895	176	22.7273	278	19.4245	218	34.8624
T1G;A53T	247	16.5992	237	14.7679	233	20.1717	249	15.261	148	12.1622	88	18.1818	220	19.0909	217	12.4424	283	9.18728	239	16.318
T1G;C54A	275	21.0909	256	21.4844	259	33.2046	280	25.3571	203	19.2118	84	28.5714	211	39.8104	246	24.3902	287	19.5122	262	17.5573
T1G;C54G	209	12.9187	243	11.9342	180	13.8889	239	10.0418	142	16.1972	74	21.6216	177	21.4689	201	16.4179	282	16.6667	253	11.4625
T1G;C54T	267	13.1086	257	12.8405	241	15.3527	302	14.9007	181	13.2597	109	11.9266	252	15.873	237	16.8776	323	10.2167	297	10.4377
T1G;C55A	156	17.9487	199	21.608	211	30.8057	235	22.9787	128	21.875	66	31.8182	155	43.2258	158	15.1899	197	18.2741	196	21.9388
T1G;C55G	95	47.3684	139	48.2014	131	61.0687	148	48.6486	63	38.0952	47	59.5745	142	66.9014	125	54.4	123	51.2195	146	44.5205
T1G;C55T	238	46.2185	304	50.3289	292	70.5479	325	54.4615	160	39.375	106	65.0943	262	79.771	253	50.5929	292	47.9452	300	55
T1G;C56A	256	15.2344	250	18.4	263	34.2205	260	16.5385	139	12.9496	85	25.8824	221	56.1086	178	21.3483	230	17.8261	246	22.7642
T1G;C56G	140	4.28571	195	9.23077	143	20.2797	192	9.375	113	3.53982	48	16.6667	141	44.6809	117	6.83761	158	10.1266	160	8.75
T1G;C56T	268	19.0299	250	21.6	305	43.2787	302	23.8411	172	25.5814	108	31.4815	240	66.6667	215	33.9535	304	23.6842	275	33.4545
T1G;T57A	190	8.42105	210	10.9524	188	37.234	256	17.1875	135	9.62963	59	28.8136	167	55.0898	217	18.894	257	7.393	194	26.2887
T1G;T57C	235	11.9149	223	15.2466	148	77.027	258	32.9457	156	19.2308	75	62.6667	133	78.9474	198	22.2222	291	21.3058	122	63.1148
T1G;T57G	171	8.77193	180	8.33333	156	28.8462	199	10.5528	131	16.0305	73	20.5479	167	48.503	147	6.80272	219	15.5251	166	16.2651
T1G;G58A	174	29.8851	214	27.1028	272	67.6471	201	34.8259	133	33.0827	100	55	293	70.6485	208	43.75	219	36.0731	217	56.2212
T1G;G58C	237	44.7257	227	60.793	327	82.5688	298	66.7785	159	47.7987	95	69.4737	251	86.0558	260	69.6154	284	59.8592	275	70.5455
T1G;G58T	289	26.2976	255	40.3922	470	79.7872	321	53.8941	218	41.7431	120	58.3333	409	87.2861	320	42.8125	288	41.6667	356	57.5843
T1G;C59A	326	76.0736	482	77.1784	480	90	459	82.3529	261	83.908	145	87.5862	405	92.8395	429	89.2774	449	84.4098	416	87.9808
T1G;C59G	168	60.119	265	67.1698	216	79.6296	231	67.0996	134	70.1493	87	78.1609	191	79.5812	248	70.5645	240	70.4167	196	72.449
T1G;C59T	301	74.7508	420	75.4762	465	86.6667	442	75.1131	223	76.6816	139	86.3309	369	87.8049	439	82.4601	424	72.1698	425	83.7647
T1G;A60C	338	81.0651	367	85.8311	356	76.6854	482	82.3651	291	86.2543	131	78.626	252	76.1905	413	86.4407	480	83.3333	356	82.0225
T1G;A60G	182	24.7253	190	22.6316	181	80.1105	218	43.578	150	20.6667	55	67.2727	160	84.375	199	31.6583	229	35.3712	183	60.6557
T1G;A60T	260	27.3077	265	28.3019	285	32.6316	301	28.5714	210	28.0952	82	24.3902	221	38.914	255	24.7059	291	22.3368	284	32.7465
T1G;G61A	214	44.3925	319	53.9185	272	80.8824	336	62.5	198	48.9899	94	62.766	293	78.8396	269	51.6729	331	48.6405	246	66.2602
T1G;G61C	267	43.8202	338	44.0828	390	79.2308	340	60	232	44.3966	134	70.8955	383	83.5509	299	49.8328	341	39.2962	342	69.0058
T1G;G61T	259	45.9459	349	44.1261	413	83.293	366	48.3607	213	44.1315	124	69.3548	339	87.3156	304	50	366	43.7158	331	77.6435
T1G;A62C	193	43.5233	207	42.9952	381	94.7507	332	71.988	142	54.2254	119	86.5546	332	92.7711	242	66.1157	217	46.0829	346	86.1272
T1G;A62G	197	44.1624	230	58.2609	265	83.0189	263	57.0342	166	50.6024	95	72.6316	252	80.9524	236	62.2881	248	56.8548	265	69.434
T1G;A62T	206	31.068	244	35.2459	293	72.0137	284	40.1408	183	30.0546	95	43.1579	284	75.7042	211	45.4976	271	34.6863	283	50.53
T1G;G63A	285	15.0877	295	22.7119	420	70.2381	362	25.1381	202	16.3366	122	27.8689	397	75.063	287	20.5575	343	18.6589	347	45.5331
T1G;G63C	287	20.2091	255	13.7255	532	80.0752	315	24.7619	187	17.6471	103	34.9515	363	76.8595	268	23.1343	277	19.4946	329	55.0152
T1G;G63T	378	11.1111	387	10.8527	583	80.789	404	17.8218	235	11.9149	160	43.125	544	82.3529	373	16.0858	446	9.19283	511	60.274
T1G;A64C	202	17.8218	188	14.3617	369	75.6098	243	19.3416	144	11.1111	86	30.2326	325	80.3077	227	22.0264	206	17.4757	276	57.6087
T1G;A64G	156	41.6667	217	47.0046	294	91.4966	302	67.8808	169	40.8284	110	73.6364	253	89.3281	237	56.962	235	50.6383	248	81.8548
T1G;A64T	239	18.8285	229	22.2707	388	84.5361	313	35.1438	177	25.9887	91	54.9451	290	85.8621	206	22.3301	277	20.9386	305	66.2295
T1G;G65A	307	29.9674	327	35.7798	506	93.2806	436	68.8073	241	39.834	183	84.153	451	94.0133	326	46.6258	402	40.0498	544	90.8088
T1G;G65C	166	13.253	178	12.3596	406	88.67	238	39.916	144	16.6667	120	68.3333	338	89.9408	201	25.8706	199	15.5779	322	78.2609
T1G;G65T	258	32.1705	250	34.4	484	89.876	378	65.3439	162	38.8889	148	81.0811	376	92.2872	266	45.8647	248	31.8548	475	89.0526
T1G;G66A	321	46.729	335	56.1194	531	94.5386	479	75.5741	286	52.4476	173	88.4393	448	95.7589	367	68.3924	432	58.1019	468	93.3761
T1G;G66C	278	67.6259	319	71.4734	418	96.89	496	92.1371	233	74.6781	142	94.3662	370	98.9189	358	87.9888	392	69.898	386	95.8549
T1G;G66T	377	83.0239	475	86.7368	453	97.1302	496	93.75	307	85.342	188	97.3404	427	96.9555	452	88.7168	487	89.117	427	95.082
T1G;C67A	241	85.8921	387	92.5065	185	94.5946	255	85.8824	182	89.5604	81	93.8272	184	92.9348	287	92.6829	361	92.5208	183	85.2459
T1G;C67G	114	56.1404	162	59.8765	65	76.9231	126	65.873	85	65.8824	31	80.6452	92	84.7826	124	69.3548	132	75	73	71.2329
T1G;C67T	156	83.3333	360	91.9444	119	89.0756	184	89.1304	135	82.2222	78	88.4615	142	88.7324	226	87.1681	272	87.1324	123	87.8049
T1G;T68A	250	83.2	481	93.763	183	94.5355	309	94.822	219	89.9543	147	96.5986	240	95.4167	315	90.4762	476	91.8067	195	93.8462
T1G;T68C	217	73.2719	345	88.1159	154	92.2078	306	86.9281	157	78.3439	98	87.7551	191	95.288	298	88.5906	339	83.4808	206	85.9223
T1G;T68G	104	40.3846	141	59.5745	58	62.069	126	56.3492	94	59.5745	42	76.1905	67	73.1343	132	53.7879	131	62.5954	67	44.7761
T1G;G69A	408	89.2157	587	91.3118	545	98.1651	535	93.271	347	89.3372	167	96.4072	434	96.7742	500	93	614	92.9967	478	93.7238
T1G;G69C	318	94.0252	417	94.2446	368	96.4674	401	95.0125	284	91.1972	145	96.5517	315	98.4127	445	93.7079	437	93.3638	318	96.2264
T1G;G69T	289	93.0796	407	94.8403	367	94.8229	367	93.4605	258	92.2481	122	96.7213	311	97.1061	409	95.11	460	95.4348	360	96.3889
T1G;A70C	152	53.2895	179	65.3631	299	91.6388	246	79.6748	124	58.871	95	83.1579	272	95.5882	185	78.9189	235	64.2553	269	90.7063
T1G;A70G	251	56.1753	264	66.2879	343	94.7522	346	75.1445	185	64.8649	114	89.4737	334	94.9102	269	64.684	314	63.3758	277	88.8087
T1G;A70T	248	74.5968	265	81.1321	332	95.4819	302	80.7947	213	83.0986	138	91.3043	289	96.5398	351	85.755	284	82.3944	281	92.1708
T1G;A71C	231	41.9913	267	50.5618	452	89.6018	330	57.5758	186	50.5376	137	75.9124	371	89.2183	315	56.8254	329	49.2401	375	80.5333
T1G;A71G	253	52.1739	298	51.0067	444	97.973	476	81.7227	200	57	180	87.2222	394	94.6701	316	65.5063	356	60.6742	360	91.9444
T1G;A71T	246	18.2927	264	18.9394	379	72.0317	327	33.945	206	20.3883	118	43.2203	327	79.5107	248	22.5806	298	20.8054	351	56.9801
T1G;A72C	243	20.1646	221	17.1946	315	41.5873	284	19.3662	157	14.6497	86	25.5814	269	50.5576	225	21.7778	292	13.0137	280	30
T1G;A72G	255	46.2745	298	49.3289	652	94.4785	409	69.9267	205	46.8293	146	79.4521	531	96.0452	308	59.4156	307	45.2769	541	88.7246
T1G;A72T	226	33.1858	220	34.5455	330	79.3939	312	40.7051	171	32.7485	95	56.8421	274	83.2117	224	39.2857	268	33.5821	327	60.8563
T2A;T3A	59	55.9322	74	66.2162	94	96.8085	145	93.1034	70	72.8571	45	91.1111	125	94.4	125	90.4	99	82.8283	94	87.234
T2A;T3C	96	19.7917	116	20.6897	46	86.9565	95	55.7895	84	23.8095	30	90	68	94.1176	125	30.4	130	28.4615	50	82
T2A;T3G	77	33.7662	89	21.3483	96	82.2917	133	81.9549	72	30.5556	48	85.4167	131	90.8397	100	59	117	29.0598	103	93.2039
T2A;C4A	68	16.1765	72	36.1111	28	85.7143	34	79.4118	37	37.8378	15	60	38	76.3158	31	58.0645	65	33.8462	28	60.7143
T2A;C4G	104	12.5	100	33	37	75.6757	77	67.5325	47	42.5532	26	84.6154	63	69.8413	55	54.5455	103	37.8641	39	61.5385
T2A;C4T	75	12	73	21.9178	30	86.6667	43	60.4651	35	22.8571	15	80	41	68.2927	55	52.7273	69	44.9275	33	57.5758
T2A;A5C	61	54.0984	83	60.241	46	82.6087	79	83.5443	34	70.5882	26	80.7692	71	81.6901	72	83.3333	101	77.2277	44	79.5455
T2A;A5G	92	31.5217	109	39.4495	87	87.3563	115	78.2609	65	43.0769	42	80.9524	100	87	97	68.0412	137	37.9562	68	89.7059
T2A;A5T	50	10	30	16.6667	24	83.3333	15	46.6667	21	19.0476	4	25	6	83.3333	15	53.3333	39	25.641	12	33.3333
T2A;G6A	189	82.0106	299	85.2843	250	89.2	313	93.6102	162	88.2716	88	88.6364	278	91.3669	315	92.381	276	88.0435	196	91.8367
T2A;G6C	226	79.646	298	90.2685	286	96.1538	322	91.6149	194	90.2062	124	96.7742	255	96.4706	304	94.7368	307	88.2736	265	93.5849
T2A;G6T	208	82.2115	327	84.0979	303	95.7096	313	92.9712	184	92.3913	123	91.0569	301	95.3488	335	93.7313	333	91.2913	233	94.8498
T2A;C7A	147	82.3129	189	93.1217	198	95.4545	227	94.2731	107	80.3738	81	95.0617	193	93.7824	223	90.583	168	89.2857	167	91.6168
T2A;C7G	136	85.2941	186	87.6344	166	98.1928	180	91.1111	103	89.3204	79	91.1392	170	94.7059	219	96.347	182	92.8571	147	93.1973
T2A;C7T	209	63.6364	219	61.6438	220	94.5455	269	88.4758	147	62.585	138	96.3768	266	90.9774	291	81.4433	300	62.3333	244	93.4426
T2A;C8A	219	80.3653	307	89.2508	401	97.2569	511	95.6947	263	94.6768	169	94.6746	430	98.3721	458	96.5066	430	92.5581	371	95.1482
T2A;C8G	113	83.1858	149	89.2617	156	98.0769	161	92.5466	98	94.898	73	94.5205	163	97.546	184	93.4783	196	88.7755	146	93.8356
T2A;C8T	159	54.717	215	70.2326	366	95.6284	401	96.2594	160	67.5	118	94.9153	378	95.2381	345	88.4058	306	70.2614	306	96.4052
T2A;G9A	210	14.7619	208	8.17308	184	63.0435	312	18.9103	203	14.2857	69	26.087	222	75.2252	276	15.5797	316	17.0886	252	34.9206
T2A;G9C	175	16.5714	215	14.4186	155	23.2258	209	17.7033	228	20.614	60	10	134	44.7761	180	20	283	19.4346	162	16.6667
T2A;G9T	181	7.73481	183	6.01093	84	16.6667	208	10.5769	159	6.91824	50	18	75	30.6667	186	6.45161	242	10.3306	147	4.08163
T2A;G10A	203	23.1527	220	27.7273	262	91.2214	320	54.375	169	28.9941	110	72.7273	292	93.4932	248	41.5323	270	31.1111	262	81.2977
T2A;G10C	112	24.1071	138	24.6377	133	74.4361	134	32.8358	95	25.2632	36	41.6667	153	80.3922	123	33.3333	143	30.0699	119	59.6639
T2A;G10T	113	11.5044	123	10.5691	98	67.3469	164	15.2439	104	16.3462	47	17.0213	118	72.0339	129	7.75194	167	17.9641	119	32.7731
T2A;A11C	84	30.9524	79	29.1139	75	62.6667	88	37.5	65	24.6154	29	58.6207	78	69.2308	86	45.3488	138	26.8116	75	48
T2A;A11G	64	46.875	96	50	161	92.5466	199	91.9598	99	61.6162	57	87.7193	203	93.5961	162	85.1852	112	75	152	92.1053
T2A;A11T	104	8.65385	87	9.1954	51	43.1373	107	15.8879	95	12.6316	28	35.7143	55	56.3636	94	17.0213	147	11.5646	58	22.4138
T2A;A12C	85	14.1176	116	9.48276	93	45.1613	142	22.5352	104	14.4231	32	28.125	95	56.8421	130	8.46154	169	15.3846	132	34.8485
T2A;A12G	71	18.3099	106	16.0377	90	81.1111	112	62.5	88	26.1364	40	77.5	120	80.8333	92	40.2174	130	21.5385	118	76.2712
T2A;A12T	227	18.5022	235	12.3404	149	9.39597	257	11.6732	165	13.3333	85	12.9412	142	24.6479	250	7.2	324	12.6543	197	5.58376
T2A;G13A	91	54.9451	86	70.9302	102	85.2941	114	73.6842	45	57.7778	46	86.9565	110	87.2727	94	80.8511	103	76.699	89	78.6517
T2A;G13C	107	16.8224	121	22.314	67	80.597	93	69.8925	60	20	32	78.125	88	75	85	50.5882	130	26.1538	71	60.5634
T2A;G13T	91	23.0769	134	35.0746	75	84	93	73.1183	59	47.4576	32	75	103	77.6699	83	62.6506	92	46.7391	87	71.2644
T2A;C14A	88	48.8636	107	58.8785	87	33.3333	134	47.7612	86	58.1395	35	54.2857	107	49.5327	96	47.9167	147	48.9796	80	33.75
T2A;C14G	62	29.0323	80	42.5	74	25.6757	80	32.5	62	48.3871	34	41.1765	75	34.6667	79	35.443	108	42.5926	68	32.3529
T2A;C14T	97	20.6186	95	13.6842	86	38.3721	104	9.61538	53	24.5283	41	24.3902	83	44.5783	90	20	110	10.9091	99	28.2828
T2A;G15A	171	23.9766	153	18.3007	121	19.0083	192	15.1042	214	26.6355	45	11.1111	134	26.1194	167	17.9641	326	21.1656	131	16.7939
T2A;G15C	98	9.18367	120	15	110	50	139	20.1439	84	20.2381	56	39.2857	122	77.8689	98	15.3061	149	18.7919	107	27.1028
T2A;G15T	118	14.4068	129	19.3798	99	21.2121	158	16.4557	82	9.7561	40	15	126	43.6508	124	13.7097	130	20.7692	115	19.1304
T2A;G16A	32	6.25	50	12	63	14.2857	57	14.0351	21	9.52381	20	5	52	28.8462	45	4.44444	29	17.2414	45	4.44444
T2A;G16C	93	26.8817	129	19.3798	131	27.4809	145	20.6897	69	18.8406	50	22	136	47.0588	105	30.4762	123	21.1382	138	23.913
T2A;G16T	41	21.9512	84	16.6667	91	27.4725	77	22.0779	23	17.3913	23	26.087	73	36.9863	67	29.8507	63	20.6349	76	26.3158
T2A;G17A	84	16.6667	106	29.2453	113	49.5575	90	21.1111	44	18.1818	36	44.4444	127	62.9921	80	31.25	96	23.9583	92	33.6957
T2A;G17C	148	56.7568	184	47.8261	191	70.6806	218	59.633	136	44.1176	73	73.9726	161	85.0932	142	54.2254	195	49.2308	165	58.1818
T2A;G17T	49	24.4898	48	22.9167	47	57.4468	56	46.4286	29	41.3793	14	42.8571	76	75	46	39.1304	39	41.0256	44	52.2727
T2A;A18C	161	14.9068	183	18.5792	198	29.798	211	22.7488	149	13.4228	74	21.6216	177	26.5537	186	15.0538	251	17.1315	202	19.802
T2A;A18G	243	24.2798	252	20.6349	198	25.7576	297	24.9158	199	19.0955	84	28.5714	201	27.3632	210	21.9048	283	23.3216	256	26.9531
T2A;A18T	173	20.8092	132	17.4242	102	29.4118	149	13.4228	93	18.2796	58	22.4138	136	22.0588	133	18.0451	144	11.1111	131	14.5038
T2A;C19A	122	45.9016	149	54.3624	165	72.1212	153	66.6667	97	45.3608	48	72.9167	191	76.9634	159	67.2956	156	57.6923	129	65.8915
T2A;C19G	62	29.0323	74	24.3243	55	23.6364	89	20.2247	50	28	17	35.2941	61	60.6557	85	28.2353	96	20.8333	66	39.3939
T2A;C19T	43	13.9535	91	8.79121	57	29.8246	75	10.6667	17	17.6471	19	42.1053	49	46.9388	43	18.6047	61	16.3934	66	19.697
T2A;G20A	137	57.6642	209	61.7225	145	65.5172	170	70	118	56.7797	60	65	173	79.1908	180	66.6667	183	63.9344	150	65.3333
T2A;G20C	44	43.1818	95	38.9474	98	59.1837	76	28.9474	51	35.2941	23	60.8696	96	55.2083	73	39.726	73	56.1644	76	52.6316
T2A;G20T	190	68.4211	277	70.0361	297	83.8384	272	67.6471	156	61.5385	89	62.9213	283	82.3322	266	75.188	312	71.7949	233	73.3906
T2A;A21C	205	20.4878	181	13.2597	152	17.7632	242	15.2893	191	13.6126	58	20.6897	143	27.972	173	15.0289	265	16.2264	176	20.4545
T2A;A21G	116	31.8966	156	34.6154	167	90.4192	225	78.2222	124	38.7097	71	85.9155	206	91.2621	193	63.2124	202	36.6337	180	95
T2A;A21T	241	19.5021	180	25.5556	211	42.1801	245	32.2449	189	15.3439	54	27.7778	187	63.1016	170	24.7059	293	17.4061	168	32.7381
T2A;C22A	133	16.5414	157	21.0191	182	56.5934	178	26.9663	93	15.0538	56	37.5	168	72.619	178	26.4045	166	16.2651	130	43.0769
T2A;C22G	78	3.84615	100	13	97	13.4021	136	8.08824	65	7.69231	29	10.3448	86	31.3953	83	8.43373	116	7.75862	106	10.3774
T2A;C22T	27	18.5185	38	15.7895	43	30.2326	68	20.5882	27	14.8148	17	5.88235	48	52.0833	50	26	51	25.4902	34	35.2941
T2A;C23A	69	18.8406	88	13.6364	62	19.3548	72	15.2778	41	14.6341	23	4.34783	83	27.7108	72	11.1111	70	14.2857	89	16.8539
T2A;C23G	32	37.5	53	67.9245	48	58.3333	40	70	31	64.5161	17	47.0588	65	56.9231	56	67.8571	49	53.0612	41	53.6585
T2A;C23T	60	11.6667	99	19.1919	96	37.5	87	17.2414	52	19.2308	28	28.5714	96	45.8333	105	12.381	125	24	64	31.25
T2A;C24A	71	32.3944	95	24.2105	84	35.7143	97	31.9588	74	22.973	30	36.6667	98	42.8571	80	21.25	87	25.2874	75	29.3333
T2A;C24G	114	50.8772	152	55.2632	121	56.1983	167	47.9042	83	49.3976	62	66.129	139	75.5396	144	48.6111	170	52.3529	111	40.5405
T2A;C24T	85	36.4706	149	36.2416	177	85.8757	159	53.4591	62	48.3871	54	72.2222	190	88.9474	142	57.7465	134	41.791	96	85.4167
T2A;G25A	92	17.3913	89	11.236	72	22.2222	81	7.40741	62	14.5161	28	10.7143	63	20.6349	84	9.52381	102	12.7451	73	10.9589
T2A;G25C	207	28.5024	207	19.3237	176	28.4091	241	24.4813	236	17.7966	83	18.0723	176	51.7045	214	28.972	366	16.9399	178	23.0337
T2A;G25T	147	10.8844	149	12.7517	144	39.5833	188	15.9574	131	19.8473	41	12.1951	125	57.6	160	20	166	23.494	138	25.3623
T2A;T26A	258	26.7442	286	31.4685	856	94.3925	572	65.3846	276	34.4203	209	82.7751	719	96.1057	378	47.8836	373	34.5845	690	88.9855
T2A;T26C	190	24.2105	198	20.7071	377	95.4907	355	68.4507	160	22.5	115	83.4783	306	96.0784	235	42.9787	247	26.7206	325	92.6154
T2A;T26G	269	33.0855	256	33.9844	693	95.2381	376	55.3191	218	42.6606	165	78.7879	506	95.4545	336	45.2381	290	40.6897	534	84.6442
T2A;T27A	286	20.6294	298	22.8188	855	94.269	509	54.4204	246	26.4228	168	69.6429	730	93.0137	346	31.7919	374	25.4011	573	82.7225
T2A;T27C	210	44.2857	238	47.479	630	99.0476	529	88.0907	179	57.5419	183	95.082	482	96.888	291	66.6667	279	46.9534	471	94.4798
T2A;T27G	241	15.3527	271	15.1292	428	61.9159	344	27.907	198	15.1515	103	24.2718	391	70.0767	276	18.1159	296	17.5676	369	43.0894
T2A;T28A	313	25.8786	304	25.3289	889	91.2261	492	48.1707	216	27.3148	182	62.6374	689	94.1945	319	32.9154	373	26.5416	592	84.7973
T2A;T28C	215	20.4651	219	24.6575	577	92.3744	355	53.2394	213	21.1268	144	70.1389	525	91.8095	244	38.5246	312	24.6795	482	85.0622
T2A;T28G	245	36.3265	268	33.9552	400	76.25	334	41.3174	229	33.1878	123	50.4065	387	83.9793	228	40.7895	253	31.2253	385	63.8961
T2A;T29A	266	18.797	316	19.9367	658	90.2736	431	41.7633	202	20.297	152	57.8947	562	90.9253	314	32.1656	370	21.8919	522	79.1188
T2A;T29C	232	65.0862	281	67.6157	457	96.4989	450	95.3333	195	72.8205	167	91.018	388	96.6495	356	83.9888	346	67.9191	401	96.5087
T2A;T29G	208	17.3077	252	15.0794	405	69.3827	318	21.0692	180	11.1111	86	33.7209	341	71.261	230	22.1739	221	24.4344	336	46.7262
T2A;C30A	200	14.5	228	12.2807	182	73.0769	292	17.8082	188	18.617	86	27.907	237	80.1688	200	19.5	273	15.3846	218	54.1284
T2A;C30G	109	12.844	154	9.74026	127	55.1181	159	17.6101	106	16.9811	48	27.0833	143	72.7273	120	7.5	165	16.3636	105	38.0952
T2A;C30T	259	18.1467	284	20.7746	460	88.0435	392	40.051	210	23.8095	124	60.4839	441	88.8889	317	26.4984	316	20.2532	442	79.1855
T2A;C31A	111	10.8108	136	13.2353	70	64.2857	147	23.1293	196	17.3469	35	17.1429	74	75.6757	115	12.1739	201	18.408	85	44.7059
T2A;C31G	120	13.3333	173	16.185	199	76.8844	210	32.8571	115	23.4783	71	54.9296	221	87.3303	175	26.2857	174	22.4138	160	55.625
T2A;C31T	164	14.0244	210	11.9048	166	84.3373	256	23.8281	188	17.0213	100	56	205	87.8049	206	13.5922	293	17.7474	180	63.8889
T2A;C32A	190	27.8947	259	23.5521	496	96.1694	426	67.6056	206	23.301	136	88.2353	444	95.7207	244	49.1803	329	25.8359	415	90.1205
T2A;C32G	70	32.8571	119	31.9328	53	98.1132	81	81.4815	53	50.9434	32	93.75	79	88.6076	71	71.831	103	43.6893	44	79.5455
T2A;C32T	242	16.9421	234	21.7949	351	91.1681	297	61.9529	201	19.403	118	77.1186	304	94.7368	299	33.4448	331	21.4502	264	86.7424
T2A;T33A	306	31.6993	314	33.758	883	97.5085	649	78.1202	232	33.1897	254	86.6142	743	96.6353	380	54.4737	351	31.6239	690	93.7681
T2A;T33C	270	35.1852	310	40.9677	451	94.9002	548	82.4818	248	56.0484	161	89.441	471	95.1168	357	67.507	353	48.7252	388	92.7835
T2A;T33G	229	50.2183	332	55.4217	506	86.7589	411	69.5864	266	58.6466	154	77.2727	439	85.877	316	64.557	375	57.8667	488	81.7623
T2A;C34A	237	27.8481	247	29.1498	633	95.7346	515	80.3883	196	44.3878	171	90.0585	487	95.2772	286	49.3007	282	30.4965	527	94.4972
T2A;C34G	292	40.7534	332	50	809	96.7862	651	86.7896	258	60.4651	228	91.6667	558	95.5197	425	72.4706	430	54.186	620	95.8065
T2A;C34T	307	28.9902	409	29.5844	708	93.7853	615	70.5691	282	32.9787	261	85.4406	593	94.7723	436	47.4771	459	26.3617	649	93.5285
T2A;T35A	261	31.4176	264	33.7121	538	96.2825	557	73.6086	218	34.8624	169	91.1243	569	94.9033	310	51.6129	409	34.9633	496	92.5403
T2A;T35C	230	43.4783	258	38.7597	568	96.1268	532	86.2782	194	55.1546	185	93.5135	540	96.1111	367	66.2125	315	48.8889	474	96.8354
T2A;T35G	247	32.3887	259	36.6795	698	96.7049	520	81.1538	189	45.5026	188	92.5532	503	98.2107	336	65.1786	302	39.0728	513	93.5673
T2A;T36A	162	27.1605	175	32	202	91.5842	247	59.1093	154	30.5195	105	77.1429	165	91.5152	185	44.8649	215	29.7674	202	91.5842
T2A;T36C	65	10.7692	69	5.7971	69	63.7681	77	40.2597	48	18.75	28	39.2857	79	64.557	89	24.7191	110	18.1818	68	48.5294
T2A;T36G	139	35.9712	192	40.1042	232	93.5345	259	84.9421	116	60.3448	76	90.7895	243	95.0617	220	76.3636	209	54.067	232	92.2414
T2A;T37A	107	20.5607	164	19.5122	135	90.3704	163	58.8957	113	20.354	74	79.7297	140	90.7143	150	41.3333	187	21.3904	146	86.9863
T2A;T37C	187	39.5722	222	41.4414	365	95.3425	356	75.8427	181	51.3812	144	90.9722	330	96.9697	247	61.9433	249	48.5944	350	93.4286
T2A;T37G	139	19.4245	146	21.2329	172	89.5349	238	86.5546	96	41.6667	71	91.5493	217	94.9309	197	76.1421	181	36.4641	167	96.4072
T2A;C38A	116	10.3448	156	22.4359	111	90.991	115	53.913	91	28.5714	46	67.3913	107	92.5234	156	33.3333	164	23.7805	129	75.969
T2A;C38G	132	20.4545	156	21.1538	176	89.7727	218	57.3394	130	23.0769	69	84.058	163	92.638	166	40.3614	198	26.2626	188	85.6383
T2A;C38T	98	23.4694	126	19.0476	112	82.1429	124	58.0645	95	24.2105	36	72.2222	95	88.4211	135	33.3333	128	19.5312	136	87.5
T2A;A39C	158	29.7468	199	34.1709	205	93.6585	265	72.4528	165	35.7576	75	77.3333	210	93.8095	206	52.4272	238	28.9916	208	89.4231
T2A;A39G	265	21.8868	308	30.5195	381	91.8635	402	66.1692	259	26.2548	150	80.6667	359	94.1504	252	44.4444	335	28.0597	300	84
T2A;A39T	205	24.3902	229	31.0044	384	92.1875	377	64.9867	217	39.1705	126	84.9206	336	95.5357	281	49.8221	303	30.6931	291	89.3471
T2A;T40A	158	20.8861	158	26.5823	190	92.6316	244	52.0492	144	22.9167	91	70.3297	187	90.9091	201	42.7861	233	26.1803	194	85.0515
T2A;T40C	118	23.7288	136	21.3235	182	91.2088	224	60.2679	155	27.0968	59	81.3559	215	92.5581	171	43.2749	228	22.807	161	86.9565
T2A;T40G	148	20.9459	215	12.093	165	92.1212	211	52.1327	183	19.1257	63	66.6667	151	86.755	178	28.6517	214	18.2243	188	82.4468
T2A;T41A	149	29.5302	170	25.2941	229	91.2664	275	67.6364	147	25.1701	109	89.9083	246	93.0894	205	53.6585	211	28.436	222	88.2883
T2A;T41C	151	31.1258	178	25.8427	194	91.2371	236	65.2542	176	25	82	71.9512	240	92.5	205	43.9024	209	30.622	216	86.1111
T2A;T41G	149	15.4362	203	17.2414	160	74.375	232	28.0172	169	14.2012	82	35.3659	229	76.8559	174	20.6897	242	15.7025	212	63.2075
T2A;G42A	147	18.3673	214	20.5607	192	90.1042	202	51.9802	157	28.0255	80	77.5	177	87.0056	220	35.4545	196	19.898	206	84.9515
T2A;G42C	193	20.7254	191	29.8429	226	93.3628	296	63.8514	184	30.4348	95	78.9474	241	94.1909	227	33.9207	272	29.0441	223	85.2018
T2A;G42T	187	21.9251	270	16.6667	193	91.1917	279	63.0824	205	32.6829	100	83	226	92.0354	254	35.8268	310	24.8387	242	91.7355
T2A;C43A	331	15.71	341	15.5425	463	90.4968	470	38.0851	255	18.0392	205	57.561	497	91.5493	397	26.4484	359	16.156	444	73.4234
T2A;C43G	197	10.6599	254	12.9921	250	54	301	15.2824	172	9.30233	69	14.4928	249	74.2972	237	14.346	268	14.1791	299	32.7759
T2A;C43T	178	20.7865	195	18.9744	178	94.382	247	59.1093	148	16.8919	86	73.2558	184	88.0435	224	31.25	250	20.4	187	81.2834
T2A;G44A	129	7.75194	165	9.69697	146	37.6712	182	18.6813	141	13.4752	65	23.0769	139	57.554	195	14.8718	230	10.8696	145	17.2414
T2A;G44C	179	21.2291	199	38.6935	193	90.6736	281	73.3096	128	32.8125	90	76.6667	245	94.2857	220	45	227	30.3965	182	84.6154
T2A;G44T	134	17.9104	154	22.7273	157	77.0701	209	39.2344	116	18.1034	57	59.6491	149	82.5503	183	28.9617	193	18.1347	164	70.122
T2A;C45A	190	14.2105	180	14.4444	174	34.4828	262	21.7557	153	16.9935	89	29.2135	222	44.5946	245	21.6327	295	13.8983	195	23.5897
T2A;C45G	77	16.8831	109	11.0092	77	55.8442	123	14.6341	67	10.4478	30	40	102	68.6275	93	17.2043	127	11.811	83	25.3012
T2A;C45T	63	15.873	70	20	97	88.6598	123	73.9837	52	28.8462	48	81.25	125	86.4	84	61.9048	94	19.1489	62	82.2581
T2A;G46A	87	65.5172	125	68	111	87.3874	169	89.9408	63	77.7778	65	90.7692	159	96.2264	156	96.1538	139	82.0144	115	94.7826
T2A;G46C	306	22.2222	315	27.3016	504	86.9048	446	50.2242	231	27.2727	154	61.6883	434	93.0876	301	35.2159	380	27.1053	433	73.6721
T2A;G46T	203	71.9212	338	80.4734	299	93.9799	345	85.7971	191	76.9634	141	89.3617	252	95.2381	359	88.3008	395	79.2405	277	94.2238
T2A;G47A	350	72.2857	387	71.3178	566	93.9929	517	83.3656	262	66.7939	171	90.0585	436	92.8899	384	81.5104	440	73.8636	358	89.6648
T2A;G47C	274	45.9854	314	48.7261	417	81.295	360	48.3333	203	44.8276	129	52.7132	349	86.2464	320	48.75	349	43.553	357	61.0644
T2A;G47T	318	48.1132	371	50.9434	465	83.6559	398	59.0452	236	51.6949	151	70.8609	409	86.7971	337	56.0831	357	54.0616	353	68.8385
T2A;G48A	277	24.9097	305	36.0656	336	57.4405	370	38.1081	201	22.8856	121	51.2397	330	67.8788	324	36.4198	330	30.303	310	38.7097
T2A;G48C	148	42.5676	160	60	145	66.8966	208	50.4808	111	65.7658	65	61.5385	171	78.9474	171	56.7251	196	45.4082	122	51.6393
T2A;G48T	276	30.4348	325	48	416	74.0385	418	44.4976	250	34.8	125	62.4	423	85.1064	329	40.1216	395	45.8228	343	54.2274
T2A;G49A	230	19.1304	233	17.1674	275	49.4545	326	22.6994	183	17.4863	107	37.3832	264	58.7121	255	19.6078	284	22.8873	297	28.6195
T2A;G49C	150	13.3333	174	10.3448	169	18.9349	201	9.95025	153	20.2614	92	20.6522	163	36.8098	199	9.04523	243	11.9342	173	11.5607
T2A;G49T	222	15.3153	289	13.4948	199	10.5528	291	15.1203	293	12.628	95	9.47368	198	26.2626	310	11.6129	356	13.764	232	9.91379
T2A;A50C	162	16.0494	164	13.4146	165	25.4545	195	20	180	16.1111	68	19.1176	147	36.7347	199	13.5678	210	20.4762	172	21.5116
T2A;A50G	84	34.5238	101	34.6535	98	63.2653	117	35.0427	69	21.7391	53	33.9623	101	76.2376	105	32.381	121	21.4876	84	44.0476
T2A;A50T	253	22.1344	243	20.1646	152	22.3684	295	22.7119	204	20.5882	78	23.0769	163	25.1534	201	22.3881	294	13.9456	175	25.1429
T2A;C51A	89	28.0899	152	29.6053	113	51.3274	151	37.0861	104	35.5769	62	40.3226	126	72.2222	107	35.514	152	28.2895	121	44.6281
T2A;C51G	135	30.3704	123	42.2764	113	46.0177	179	29.0503	89	37.0787	38	31.5789	139	62.5899	134	30.597	157	39.4904	125	27.2
T2A;C51T	80	30	87	40.2299	98	74.4898	128	37.5	65	36.9231	45	48.8889	112	81.25	104	50	113	41.5929	90	47.7778
T2A;G52A	69	43.4783	79	54.4304	83	78.3133	100	58	69	47.8261	34	70.5882	94	88.2979	94	50	83	54.2169	62	64.5161
T2A;G52C	81	25.9259	117	29.9145	120	70	118	50	77	27.2727	44	50	154	82.4675	110	42.7273	141	25.5319	120	44.1667
T2A;G52T	75	38.6667	96	52.0833	78	56.4103	97	39.1753	50	34	33	54.5455	97	74.2268	72	58.3333	88	59.0909	58	51.7241
T2A;A53C	233	14.5923	236	13.1356	236	41.9492	267	19.1011	194	16.4948	74	16.2162	227	54.185	234	17.094	338	12.7219	243	25.1029
T2A;A53G	138	17.3913	175	15.4286	217	77.8802	230	27.8261	182	14.2857	83	55.4217	202	83.1683	212	25.9434	239	16.318	218	59.1743
T2A;A53T	255	15.6863	280	14.6429	189	25.3968	359	18.1058	244	9.42623	118	27.9661	249	21.6867	286	15.3846	364	15.6593	288	22.9167
T2A;C54A	254	33.8583	293	33.7884	287	57.8397	323	41.4861	184	33.6957	108	37.037	314	76.4331	319	42.9467	318	33.6478	290	38.6207
T2A;C54G	240	22.0833	228	19.7368	221	33.0317	251	17.9283	175	24	97	26.8041	228	45.614	254	22.8346	274	22.2628	273	18.6813
T2A;C54T	259	19.6911	278	12.2302	272	20.2206	362	13.8122	221	15.8371	103	26.2136	279	26.8817	350	15.1429	405	17.7778	348	14.6552
T2A;C55A	150	30	159	25.7862	220	65.4545	197	36.5482	122	17.2131	71	50.7042	170	80.5882	146	23.9726	162	34.5679	180	43.3333
T2A;C55G	92	52.1739	96	47.9167	117	64.9573	96	40.625	66	48.4848	33	36.3636	117	65.812	88	46.5909	86	53.4884	83	51.8072
T2A;C55T	160	30.625	193	31.6062	232	96.9828	284	82.3944	119	48.7395	110	84.5455	236	94.0678	195	76.4103	186	48.9247	176	89.2045
T2A;C56A	142	17.6056	188	15.9574	200	78	178	36.5169	100	19	53	52.8302	222	87.8378	146	34.9315	161	29.1925	141	53.9007
T2A;C56G	54	20.3704	70	18.5714	61	55.7377	79	20.2532	46	10.8696	30	46.6667	74	64.8649	55	27.2727	77	12.987	54	31.4815
T2A;C56T	221	19.0045	249	24.8996	289	81.3149	298	46.6443	152	30.2632	116	64.6552	339	94.3953	275	45.4545	300	27.3333	260	71.9231
T2A;T57A	91	8.79121	110	14.5455	147	76.1905	145	38.6207	105	20	57	57.8947	131	78.626	146	27.3973	157	16.5605	116	56.8966
T2A;T57C	245	23.2653	219	15.5251	78	84.6154	189	45.5026	213	18.7793	51	74.5098	116	90.5172	157	23.5669	295	19.322	102	80.3922
T2A;T57G	75	20	84	15.4762	88	51.1364	120	30	70	14.2857	29	27.5862	98	74.4898	100	23	128	16.4062	83	42.1687
T2A;G58A	189	20.1058	241	34.4398	264	93.5606	236	72.0339	144	23.6111	104	84.6154	297	90.5724	237	57.8059	245	32.6531	206	83.4951
T2A;G58C	110	40.9091	169	55.6213	162	84.5679	175	85.1429	85	54.1176	66	92.4242	205	94.1463	184	77.7174	132	58.3333	159	87.4214
T2A;G58T	335	51.0448	392	52.0408	543	94.6593	596	83.557	285	61.0526	202	91.5842	538	94.9814	454	76.4317	449	55.2339	492	91.8699
T2A;C59A	208	54.8077	294	62.2449	342	95.0292	376	89.8936	172	83.1395	131	93.1298	338	96.4497	318	90.8805	282	71.2766	251	94.8207
T2A;C59G	60	20	84	16.6667	104	86.5385	86	77.907	43	32.5581	36	88.8889	125	88.8	76	71.0526	68	17.6471	81	88.8889
T2A;C59T	159	49.0566	209	50.7177	233	95.279	281	91.4591	117	67.5214	119	89.0756	285	95.0877	257	85.6031	255	67.8431	246	91.0569
T2A;A60C	143	16.7832	160	19.375	235	90.6383	213	60.5634	124	27.4194	80	75	231	92.2078	221	35.2941	235	21.2766	176	83.5227
T2A;A60G	134	15.6716	181	20.9945	123	88.6179	172	58.1395	137	25.5474	60	90	140	89.2857	200	37	183	24.5902	105	79.0476
T2A;A60T	200	21.5	248	14.5161	275	64.3636	309	30.0971	190	15.2632	100	40	269	79.1822	280	24.2857	290	12.069	298	50
T2A;G61A	111	27.027	149	27.5168	142	88.7324	181	77.3481	105	48.5714	71	87.3239	165	88.4848	157	62.4204	151	39.0728	138	82.6087
T2A;G61C	200	24.5	274	36.8613	435	93.7931	446	85.8744	255	60	152	88.1579	400	95.25	343	67.3469	325	45.8462	406	93.1034
T2A;G61T	224	33.4821	252	37.6984	324	92.284	355	78.5915	196	41.3265	122	85.2459	322	94.0994	305	57.0492	352	42.6136	291	87.9725
T2A;A62C	231	54.5455	299	54.1806	546	98.5348	531	95.1036	234	76.4957	203	97.0443	452	98.2301	410	80.9756	359	65.7382	473	96.6173
T2A;A62G	129	50.3876	150	46.6667	143	90.9091	241	84.2324	110	55.4545	71	84.507	199	91.4573	189	75.1323	156	51.2821	160	86.875
T2A;A62T	254	35.0394	256	42.5781	575	95.6522	456	80.4825	233	58.7983	170	86.4706	490	94.6939	379	71.504	348	46.8391	462	90.0433
T2A;G63A	325	14.1538	351	19.3732	729	93.1413	555	46.8468	284	20.0704	174	69.5402	658	95.7447	375	29.0667	418	21.0526	632	81.3291
T2A;G63C	318	17.6101	331	21.7523	829	95.8987	479	52.8184	268	22.3881	217	78.8018	688	93.0233	352	30.6818	324	23.1481	669	87.7429
T2A;G63T	344	22.9651	345	24.058	1412	98.017	837	80.5257	321	42.0561	339	89.3805	1114	97.307	552	58.3333	477	23.4801	1051	94.9572
T2A;A64C	210	16.6667	237	22.7848	613	93.4747	401	52.6185	194	19.5876	124	64.5161	501	94.012	276	33.6957	275	18.1818	513	80.5068
T2A;A64G	185	40	196	36.2245	309	95.4693	290	85.5172	167	56.2874	80	90	264	95.4545	250	66	240	55.4167	259	92.278
T2A;A64T	257	22.179	284	22.1831	656	95.2744	503	74.3539	216	34.2593	217	82.9493	534	96.2547	293	50.8532	320	26.5625	611	93.7807
T2A;G65A	413	62.4697	516	72.8682	902	99.0022	921	97.3941	446	91.4798	383	98.1723	736	98.6413	796	94.8492	647	84.0804	844	98.5782
T2A;G65C	211	38.8626	217	49.7696	431	96.7517	451	94.4568	242	88.4298	138	96.3768	415	98.0723	421	95.2494	352	73.0114	386	95.3368
T2A;G65T	376	68.3511	476	76.4706	705	98.156	727	96.2861	368	96.4674	240	96.25	601	97.005	627	96.9697	622	90.836	602	97.1761
T2A;G66A	111	72.0721	168	82.1429	163	96.9325	209	94.7368	114	86.8421	85	94.1176	249	94.7791	231	94.8052	209	89.4737	187	96.2567
T2A;G66C	241	32.7801	263	55.1331	472	97.8814	517	97.6789	233	91.8455	167	95.2096	399	98.4962	432	97.6852	364	80.4945	433	97.6905
T2A;G66T	191	82.199	266	89.0977	285	98.5965	304	96.7105	158	94.3038	130	95.3846	254	97.6378	280	93.9286	234	91.8803	284	97.8873
T2A;C67A	46	58.6957	67	77.6119	69	91.3043	107	88.785	40	92.5	43	90.6977	108	89.8148	106	85.8491	78	76.9231	77	87.013
T2A;C67G	25	12	41	31.7073	53	88.6792	62	83.871	17	29.4118	21	80.9524	55	89.0909	56	69.6429	37	29.7297	64	92.1875
T2A;C67T	47	53.1915	65	50.7692	88	94.3182	81	80.2469	37	81.0811	30	90	77	81.8182	93	87.0968	60	55	79	87.3418
T2A;T68A	52	61.5385	83	73.494	92	94.5652	127	95.2756	49	89.7959	48	93.75	126	94.4444	102	95.098	85	88.2353	74	90.5405
T2A;T68C	66	63.6364	96	76.0417	61	100	108	89.8148	44	70.4545	46	91.3043	120	96.6667	119	84.0336	80	88.75	91	91.2088
T2A;T68G	32	12.5	32	15.625	46	80.4348	43	81.3953	22	27.2727	14	85.7143	56	92.8571	44	47.7273	36	19.4444	37	75.6757
T2A;G69A	201	88.5572	256	85.1562	285	96.8421	332	93.9759	160	93.125	117	94.8718	304	98.3553	302	94.702	300	91	305	94.7541
T2A;G69C	197	91.3706	218	93.578	256	98.0469	269	97.026	139	95.6835	79	96.2025	235	96.5957	237	98.3122	230	95.6522	194	96.9072
T2A;G69T	246	95.935	274	94.8905	275	100	279	97.491	174	98.8506	119	99.1597	265	97.7358	315	97.7778	299	96.99	249	98.7952
T2A;A70C	263	88.2129	320	90.9375	429	99.5338	504	97.619	233	94.4206	157	96.8153	374	98.6631	408	96.3235	388	94.5876	379	98.9446
T2A;A70G	125	37.6	165	35.1515	178	93.8202	243	83.5391	112	41.0714	75	96	221	96.8326	184	70.1087	210	45.2381	162	95.0617
T2A;A70T	231	48.4848	245	48.5714	563	99.4671	459	87.7996	199	49.2462	154	94.8052	446	96.861	325	69.2308	283	48.7633	423	97.1631
T2A;A71C	273	32.2344	254	42.9134	805	97.6398	596	81.8792	235	51.4894	210	94.2857	663	98.4917	390	65.641	376	49.4681	635	95.4331
T2A;A71G	249	32.1285	264	35.6061	590	98.4746	516	80.814	248	52.0161	185	87.5676	521	97.5048	352	65.9091	323	42.7245	536	93.6567
T2A;A71T	235	14.0426	231	19.4805	575	87.6522	385	50.9091	214	24.2991	119	60.5042	522	93.4866	295	37.2881	336	13.6905	465	75.4839
T2A;A72C	252	34.127	270	35.5556	759	96.4427	532	75	248	48.7903	192	84.8958	560	97.5	378	56.6138	346	39.3064	630	95.0794
T2A;A72G	212	34.434	220	32.7273	400	97.5	405	77.5309	164	45.7317	135	91.1111	348	96.5517	242	61.9835	294	42.8571	394	95.6853
T2A;A72T	247	30.7692	259	38.9961	607	98.1878	514	80.5447	231	47.619	210	90	560	97.1429	344	60.4651	323	46.4396	549	93.8069
T2C;T3A	112	13.3929	120	20	62	67.7419	109	53.211	94	15.9574	31	77.4194	58	86.2069	117	33.3333	139	19.4245	54	62.963
T2C;T3C	88	31.8182	95	42.1053	73	68.4932	124	39.5161	60	30	43	44.186	76	71.0526	94	34.0426	113	23.0088	89	44.9438
T2C;T3G	147	61.9048	191	76.9634	162	95.679	219	89.4977	95	76.8421	75	89.3333	142	90.8451	175	94.2857	204	76.4706	119	91.5966
T2C;C4A	93	29.0323	87	41.3793	42	59.5238	48	60.4167	47	44.6809	14	57.1429	52	82.6923	73	56.1644	82	42.6829	41	73.1707
T2C;C4G	62	66.129	127	73.2283	83	81.9277	79	84.8101	81	70.3704	32	100	84	77.381	95	83.1579	121	72.7273	66	75.7576
T2C;C4T	81	17.284	94	36.1702	55	60	55	63.6364	69	34.7826	22	59.0909	72	81.9444	89	48.3146	83	36.1446	44	72.7273
T2C;A5C	77	49.3506	112	34.8214	68	52.9412	114	38.5965	70	40	43	65.1163	86	53.4884	128	49.2188	85	49.4118	116	41.3793
T2C;A5G	108	16.6667	125	37.6	77	72.7273	111	66.6667	65	33.8462	40	72.5	77	88.3117	118	49.1525	138	41.3043	90	73.3333
T2C;A5T	37	5.40541	41	4.87805	10	60	21	71.4286	37	18.9189	6	33.3333	12	83.3333	41	21.9512	66	19.697	8	75
T2C;G6A	221	78.2805	261	87.3563	203	92.6108	288	86.1111	124	91.129	83	92.7711	204	94.6078	259	91.8919	263	90.4943	238	94.5378
T2C;G6C	117	74.359	159	83.0189	114	89.4737	156	84.6154	91	90.1099	56	80.3571	113	84.0708	153	91.5033	160	81.25	120	87.5
T2C;G6T	206	83.0097	247	84.6154	204	97.0588	298	88.5906	157	81.5287	96	90.625	239	90.795	251	94.4223	280	87.1429	221	90.9502
T2C;C7A	293	86.6894	409	89.7311	371	97.3046	437	94.508	255	91.3725	178	96.0674	374	95.9893	390	94.1026	385	91.1688	395	95.443
T2C;C7G	160	62.5	239	80.3347	232	90.9483	251	88.4462	169	79.8817	92	94.5652	207	96.1353	293	94.5392	255	79.2157	214	91.1215
T2C;C7T	228	62.2807	236	73.7288	264	93.1818	316	88.6076	154	79.8701	120	91.6667	267	90.2622	297	89.2256	310	80.6452	260	90.3846
T2C;C8A	162	48.7654	225	56.4444	284	93.3099	263	80.9886	113	53.0973	87	90.8046	277	94.5848	210	60	229	56.7686	265	91.6981
T2C;C8G	139	61.1511	215	73.9535	196	93.8776	232	95.6897	112	84.8214	96	86.4583	205	95.6098	253	88.9328	203	81.2808	187	97.3262
T2C;C8T	134	41.791	170	42.9412	170	89.4118	184	72.2826	115	45.2174	55	78.1818	179	92.7374	168	55.9524	151	49.0066	179	89.3855
T2C;G9A	251	6.3745	217	8.29493	159	31.4465	304	11.1842	184	11.9565	81	19.7531	137	57.6642	236	11.8644	274	12.7737	204	24.0196
T2C;G9C	168	10.119	226	11.9469	215	17.6744	233	10.3004	157	15.2866	69	10.1449	137	27.0073	190	10.5263	284	17.2535	212	7.54717
T2C;G9T	135	11.1111	135	11.8519	86	11.6279	189	6.87831	136	11.0294	41	9.7561	85	29.4118	140	14.2857	207	9.66184	115	14.7826
T2C;G10A	207	12.0773	226	19.9115	151	60.9272	242	28.0992	160	23.125	71	45.0704	164	71.3415	248	27.0161	240	18.3333	195	46.6667
T2C;G10C	111	14.4144	127	22.8346	90	50	152	21.7105	86	23.2558	45	31.1111	98	54.0816	124	29.8387	122	27.8689	103	41.7476
T2C;G10T	196	7.65306	182	9.34066	138	30.4348	209	10.5263	138	7.97101	57	10.5263	110	43.6364	198	8.58586	274	13.5036	170	21.7647
T2C;A11C	65	20	73	23.2877	91	43.956	99	25.2525	71	22.5352	31	25.8065	66	53.0303	107	23.3645	104	15.3846	81	27.1605
T2C;A11G	78	30.7692	97	45.3608	77	83.1169	102	69.6078	63	44.4444	37	70.2703	90	90	95	57.8947	105	47.619	68	89.7059
T2C;A11T	107	8.41121	142	11.9718	69	20.2899	129	13.9535	77	6.49351	29	6.89655	64	43.75	127	18.1102	144	6.94444	113	15.0442
T2C;A12C	93	9.67742	134	12.6866	99	25.2525	139	5.7554	99	7.07071	40	22.5	88	35.2273	124	10.4839	187	9.62567	109	11.9266
T2C;A12G	80	15	89	12.3596	64	62.5	92	51.087	60	21.6667	39	46.1538	42	69.0476	97	28.866	132	21.2121	50	44
T2C;A12T	185	7.02703	208	10.0962	140	7.14286	267	10.1124	141	12.766	73	6.84932	148	16.2162	204	9.80392	298	10.0671	170	8.82353
T2C;G13A	130	27.6923	153	28.7582	71	73.2394	138	74.6377	81	41.9753	41	80.4878	130	85.3846	124	55.6452	160	34.375	79	82.2785
T2C;G13C	132	16.6667	115	20	45	68.8889	118	44.9153	65	26.1538	29	58.6207	63	66.6667	101	39.604	138	15.2174	56	51.7857
T2C;G13T	148	22.2973	164	29.2683	73	71.2329	133	55.6391	85	34.1176	45	55.5556	84	76.1905	124	37.0968	154	32.4675	80	56.25
T2C;C14A	115	30.4348	159	28.3019	102	34.3137	144	34.7222	132	36.3636	56	42.8571	93	31.1828	149	36.2416	173	42.1965	141	25.5319
T2C;C14G	98	22.449	137	40.146	67	23.8806	148	32.4324	102	34.3137	35	37.1429	74	33.7838	93	29.0323	125	38.4	109	33.945
T2C;C14T	92	15.2174	180	34.4444	93	24.7312	155	24.5161	77	19.4805	51	25.4902	92	30.4348	112	29.4643	152	30.2632	94	25.5319
T2C;G15A	156	17.3077	178	8.98876	142	11.2676	206	12.1359	173	19.6532	80	17.5	151	13.9073	186	12.3656	276	13.7681	158	10.1266
T2C;G15C	101	47.5248	102	50.9804	111	58.5586	151	48.3444	97	51.5464	46	60.8696	92	59.7826	140	52.1429	123	51.2195	101	33.6634
T2C;G15T	108	58.3333	151	60.2649	107	56.0748	159	62.8931	110	57.2727	49	61.2245	116	69.8276	124	64.5161	151	59.6026	125	53.6
T2C;G16A	132	4.54545	121	5.78512	105	6.66667	184	8.15217	84	3.57143	52	11.5385	117	17.094	115	12.1739	145	5.51724	141	5.67376
T2C;G16C	102	25.4902	119	26.8908	112	26.7857	135	11.8519	77	6.49351	38	21.0526	92	31.5217	84	29.7619	111	33.3333	120	23.3333
T2C;G16T	130	13.0769	156	16.6667	123	17.0732	157	15.2866	108	8.33333	47	14.8936	120	28.3333	129	12.4031	133	15.0376	139	11.5108
T2C;G17A	151	18.543	198	22.2222	170	24.7059	213	17.8404	123	13.0081	71	18.3099	132	45.4545	174	26.4368	192	22.3958	157	12.1019
T2C;G17C	101	56.4356	129	67.4419	106	66.9811	111	63.964	75	62.6667	43	58.1395	99	67.6768	88	64.7727	159	64.1509	93	63.4409
T2C;G17T	126	11.9048	133	28.5714	98	31.6327	135	14.0741	93	11.828	51	17.6471	103	52.4272	116	15.5172	150	18	145	18.6207
T2C;A18C	169	18.9349	159	10.6918	161	15.528	213	15.0235	105	18.0952	59	22.0339	123	28.4553	173	9.24855	230	11.3043	185	17.8378
T2C;A18G	211	23.6967	208	20.1923	192	22.9167	255	18.0392	166	15.6627	64	26.5625	183	30.0546	252	24.6032	270	17.4074	197	21.8274
T2C;A18T	106	14.1509	92	14.1304	103	15.534	115	8.69565	75	16	49	26.5306	92	14.1304	115	15.6522	130	12.3077	112	16.0714
T2C;C19A	122	29.5082	167	38.9222	137	54.0146	177	38.9831	84	22.619	50	40	108	57.4074	169	46.1538	161	33.5404	144	41.6667
T2C;C19G	86	18.6047	127	13.3858	83	18.0723	166	18.6747	74	10.8108	41	9.7561	95	20	112	23.2143	147	21.7687	116	12.069
T2C;C19T	112	11.6071	140	14.2857	117	15.3846	162	8.64198	92	11.9565	58	22.4138	105	29.5238	137	18.9781	146	14.3836	110	13.6364
T2C;G20A	148	31.7568	187	40.107	125	47.2	136	33.8235	99	28.2828	43	39.5349	149	56.3758	147	38.0952	148	37.8378	148	37.1622
T2C;G20C	124	16.129	152	16.4474	104	28.8462	162	7.40741	91	12.0879	57	10.5263	118	28.8136	130	17.6923	157	17.1975	130	13.8462
T2C;G20T	178	35.3933	185	43.2432	172	51.7442	225	40	120	40	83	44.5783	187	58.2888	195	49.2308	221	49.3213	201	44.2786
T2C;A21C	216	14.8148	197	20.3046	186	11.2903	211	14.218	147	14.966	62	22.5806	121	20.6612	160	16.25	224	14.7321	172	10.4651
T2C;A21G	114	25.4386	130	27.6923	120	89.1667	125	50.4	81	28.3951	53	66.0377	104	90.3846	163	38.0368	152	30.9211	116	72.4138
T2C;A21T	174	19.5402	198	19.1919	181	31.4917	213	23.0047	151	15.894	63	31.746	157	36.3057	168	19.6429	275	16.3636	204	19.1176
T2C;C22A	106	20.7547	148	39.1892	87	37.931	145	24.8276	70	18.5714	37	16.2162	122	38.5246	109	29.3578	154	31.8182	94	21.2766
T2C;C22G	81	11.1111	79	15.1899	61	19.6721	99	17.1717	58	13.7931	44	20.4545	75	28	80	23.75	91	10.989	56	17.8571
T2C;C22T	107	16.8224	148	20.9459	104	11.5385	136	21.3235	62	16.129	50	30	101	17.8218	126	19.8413	149	18.7919	106	5.66038
T2C;C23A	91	23.0769	129	27.907	93	15.0538	127	21.2598	49	10.2041	48	25	100	27	105	24.7619	117	20.5128	99	19.1919
T2C;C23G	53	33.9623	71	36.6197	48	25	50	48	48	56.25	10	50	62	46.7742	42	61.9048	65	55.3846	64	45.3125
T2C;C23T	92	17.3913	157	15.9236	113	15.9292	131	12.2137	54	14.8148	53	22.6415	98	31.6327	131	19.084	113	21.2389	120	10
T2C;C24A	100	20	110	31.8182	79	22.7848	97	24.7423	74	14.8649	62	38.7097	80	31.25	98	32.6531	139	32.3741	104	22.1154
T2C;C24G	97	20.6186	153	41.1765	109	34.8624	131	25.1908	70	24.2857	42	26.1905	100	46	126	41.2698	127	37.0079	105	30.4762
T2C;C24T	86	47.6744	171	61.4035	112	83.0357	155	54.1935	70	50	44	63.6364	124	74.1935	114	60.5263	156	53.2051	128	55.4688
T2C;G25A	148	10.8108	200	17	164	14.0244	210	10.4762	123	6.50407	55	12.7273	150	17.3333	182	9.34066	180	12.2222	166	9.03614
T2C;G25C	226	12.8319	233	18.4549	212	24.0566	283	20.4947	190	11.5789	83	18.0723	207	34.2995	278	15.4676	327	14.9847	239	17.5732
T2C;G25T	149	14.7651	208	19.7115	139	17.9856	198	13.6364	137	18.9781	56	23.2143	127	35.4331	189	15.3439	219	17.8082	206	18.4466
T2C;T26A	190	19.4737	228	21.9298	265	80	235	27.234	180	15	81	39.5062	196	83.6735	207	20.7729	284	21.1268	225	58.6667
T2C;T26C	190	28.4211	177	22.0339	254	88.189	262	59.1603	137	22.6277	78	78.2051	232	92.6724	213	26.7606	214	26.1682	229	89.083
T2C;T26G	146	25.3425	194	28.866	182	72.5275	226	36.2832	109	14.6789	67	34.3284	161	79.5031	187	31.5508	181	25.9669	148	47.973
T2C;T27A	231	16.8831	225	20.4444	294	86.7347	303	28.7129	222	17.5676	97	58.7629	258	82.9457	269	22.3048	246	16.2602	281	57.6512
T2C;T27C	77	19.4805	97	16.4948	108	84.2593	109	44.0367	78	17.9487	45	64.4444	119	89.916	110	30.9091	132	18.9394	124	79.0323
T2C;T27G	212	18.8679	184	12.5	208	35.0962	187	15.508	154	18.1818	77	9.09091	185	39.4595	200	13.5	236	20.339	196	20.9184
T2C;T28A	189	22.2222	223	17.4888	376	82.9787	296	29.3919	201	23.8806	90	45.5556	269	86.6171	268	23.5075	288	24.6528	297	59.9327
T2C;T28C	92	9.78261	110	20	100	72	138	18.1159	91	15.3846	39	41.0256	88	63.6364	129	20.9302	160	21.875	93	46.2366
T2C;T28G	72	22.2222	106	28.3019	76	47.3684	80	25	61	13.1148	31	35.4839	80	57.5	90	44.4444	83	30.1205	64	26.5625
T2C;T29A	195	17.9487	218	23.3945	364	76.0989	314	27.3885	205	21.4634	98	33.6735	296	86.1486	234	22.2222	299	21.4047	292	61.6438
T2C;T29C	187	50.2674	202	57.9208	310	96.4516	241	84.2324	148	58.7838	94	91.4894	259	91.1197	185	68.1081	217	53.9171	301	92.691
T2C;T29G	178	12.9213	193	15.0259	169	37.2781	202	10.8911	131	20.6107	66	22.7273	150	42.6667	166	18.0723	214	13.5514	182	26.9231
T2C;C30A	149	9.39597	179	21.7877	151	56.2914	242	16.1157	148	9.45946	58	25.8621	172	72.093	183	15.847	237	14.7679	215	35.814
T2C;C30G	111	9.00901	160	11.875	126	34.9206	176	11.9318	144	10.4167	47	23.4043	109	38.5321	147	10.8844	170	5.88235	130	17.6923
T2C;C30T	181	19.337	185	21.6216	222	77.9279	268	26.1194	178	17.4157	67	40.2985	181	81.2155	253	25.6917	253	18.1818	222	67.1171
T2C;C31A	176	10.7955	164	13.4146	40	37.5	205	8.78049	148	16.8919	46	21.7391	57	57.8947	160	5	169	11.2426	96	20.8333
T2C;C31G	138	15.2174	156	17.9487	135	72.5926	197	26.9036	100	15	59	45.7627	150	81.3333	172	24.4186	174	16.092	149	56.3758
T2C;C31T	150	12.6667	191	17.801	114	64.9123	222	22.0721	152	11.8421	71	22.5352	122	77.8689	181	16.5746	218	16.055	150	52
T2C;C32A	147	12.2449	158	24.0506	126	76.1905	155	40	136	21.3235	63	61.9048	104	76.9231	160	20.625	248	20.1613	124	74.1935
T2C;C32G	115	31.3043	109	43.1193	96	92.7083	113	69.9115	67	43.2836	32	93.75	89	93.2584	101	65.3465	147	41.4966	84	90.4762
T2C;C32T	150	18.6667	164	18.2927	154	87.6623	212	45.7547	152	26.9737	52	57.6923	152	92.7632	220	16.8182	240	24.5833	149	79.8658
T2C;T33A	155	16.129	222	27.9279	286	88.8112	221	46.6063	158	15.1899	87	68.9655	272	88.9706	200	25.5	259	21.2355	211	79.1469
T2C;T33C	164	33.5366	194	40.7216	222	89.1892	214	66.3551	155	35.4839	94	80.8511	198	91.4141	178	47.191	223	50.2242	188	77.6596
T2C;T33G	111	34.2342	128	41.4062	117	49.5726	152	47.3684	96	29.1667	49	46.9388	135	50.3704	120	56.6667	157	43.949	126	36.5079
T2C;C34A	183	19.6721	184	24.4565	250	91.2	197	48.2234	172	24.4186	60	68.3333	204	93.6275	198	38.8889	228	21.4912	205	83.9024
T2C;C34G	161	36.646	185	39.4595	233	92.2747	228	72.807	114	53.5088	82	78.0488	228	90.7895	217	53.4562	221	42.9864	203	83.2512
T2C;C34T	232	20.2586	229	24.0175	281	90.0356	273	43.2234	190	18.4211	105	68.5714	230	90.4348	247	29.9595	323	30.3406	285	81.0526
T2C;T35A	189	24.3386	215	26.5116	283	91.1661	225	53.7778	147	23.1293	88	75	230	90	212	37.7358	222	29.2793	254	80.315
T2C;T35C	132	33.3333	198	32.8283	264	92.0455	246	60.1626	150	39.3333	67	77.6119	239	90.795	157	47.7707	210	31.4286	217	86.1751
T2C;T35G	187	37.9679	193	40.9326	380	89.4737	269	63.5688	142	42.2535	116	84.4828	326	91.411	257	56.0311	258	48.8372	278	87.4101
T2C;T36A	135	18.5185	148	19.5946	118	91.5254	165	49.0909	107	22.4299	56	62.5	140	89.2857	160	36.25	171	24.5614	118	67.7966
T2C;T36C	82	4.87805	101	14.8515	70	27.1429	111	8.10811	80	8.75	35	25.7143	70	51.4286	108	10.1852	146	9.58904	103	27.1845
T2C;T36G	106	43.3962	126	39.6825	164	93.2927	207	88.4058	96	57.2917	88	89.7727	148	95.2703	188	76.0638	186	51.0753	154	86.3636
T2C;T37A	125	16	156	19.2308	80	77.5	176	37.5	101	23.7624	44	40.9091	96	87.5	161	32.9193	171	16.9591	98	74.4898
T2C;T37C	91	25.2747	105	42.8571	90	77.7778	130	36.1538	79	27.8481	34	52.9412	92	80.4348	90	42.2222	122	45.9016	129	51.1628
T2C;T37G	96	29.1667	134	26.1194	119	84.0336	150	75.3333	74	28.3784	79	82.2785	140	92.8571	138	67.3913	163	38.6503	121	82.6446
T2C;C38A	135	9.62963	146	16.4384	67	67.1642	137	27.7372	106	21.6981	34	50	75	81.3333	138	27.5362	174	12.6437	101	62.3762
T2C;C38G	124	15.3226	138	13.7681	120	75	157	43.3121	107	19.6262	67	59.7015	109	88.9908	145	29.6552	174	20.1149	130	72.3077
T2C;C38T	129	15.5039	119	15.9664	62	80.6452	145	30.3448	90	12.2222	37	51.3514	85	81.1765	116	18.1034	159	13.8365	74	67.5676
T2C;A39C	114	16.6667	147	22.449	110	79.0909	135	37.037	95	23.1579	52	59.6154	128	89.8438	130	38.4615	183	30.0546	118	71.1864
T2C;A39G	157	29.2994	192	28.125	134	78.3582	234	38.4615	150	30.6667	72	56.9444	143	76.9231	210	37.1429	219	36.0731	136	66.9118
T2C;A39T	182	22.5275	190	30	229	83.8428	248	52.0161	141	25.5319	89	76.4045	210	90	203	46.3054	214	22.8972	241	81.3278
T2C;T40A	125	16.8	197	17.2589	99	67.6768	192	36.9792	128	15.625	70	58.5714	119	82.3529	192	28.6458	188	18.0851	140	55.7143
T2C;T40C	117	15.3846	155	26.4516	129	88.3721	161	45.9627	100	31	56	64.2857	113	85.8407	152	27.6316	167	24.5509	103	75.7282
T2C;T40G	132	15.1515	193	24.8705	141	74.4681	183	30.0546	142	26.7606	54	40.7407	128	82.0312	174	18.3908	188	19.1489	135	53.3333
T2C;T41A	125	27.2	181	23.7569	125	80.8	184	45.6522	106	30.1887	64	67.1875	167	92.2156	203	40.8867	197	21.8274	170	79.4118
T2C;T41C	123	17.8862	184	23.3696	117	77.7778	167	41.9162	105	24.7619	49	53.0612	129	78.2946	124	28.2258	183	22.4044	106	68.8679
T2C;T41G	129	7.75194	154	20.1299	126	61.1111	192	16.1458	117	9.40171	61	24.5902	122	72.9508	160	18.125	187	14.9733	167	40.1198
T2C;G42A	162	6.17284	178	16.2921	85	81.1765	196	20.9184	132	10.6061	67	62.6866	122	83.6066	200	19	216	15.2778	131	63.3588
T2C;G42C	168	17.8571	193	30.0518	155	81.9355	200	52	155	23.2258	56	69.6429	145	85.5172	191	35.6021	235	23.4043	110	73.6364
T2C;G42T	184	9.78261	239	20.0837	155	85.1613	208	40.3846	155	20	85	58.8235	144	86.8056	247	24.2915	282	15.9574	183	73.224
T2C;C43A	197	15.736	239	19.6653	239	71.1297	284	19.0141	155	16.129	115	46.9565	223	79.8206	251	17.1315	306	12.4183	182	51.0989
T2C;C43G	164	14.6341	192	11.4583	131	38.1679	217	12.9032	144	13.1944	51	23.5294	140	42.8571	218	15.5963	246	17.0732	191	25.6545
T2C;C43T	169	14.2012	186	19.8925	113	73.4513	170	35.8824	149	15.4362	58	60.3448	119	76.4706	202	18.8119	216	20.8333	97	75.2577
T2C;G44A	202	11.8812	180	10.5556	138	18.8406	248	11.6935	176	10.2273	84	17.8571	144	38.1944	211	8.53081	254	10.6299	192	6.77083
T2C;G44C	182	35.7143	204	50	167	85.0299	259	66.0232	142	45.7746	84	77.381	179	88.2682	195	56.4103	203	46.3054	194	83.5052
T2C;G44T	154	11.039	195	25.1282	114	60.5263	239	22.1757	123	18.6992	73	53.4247	142	73.9437	187	29.4118	238	22.2689	144	53.4722
T2C;C45A	192	13.0208	181	13.2597	191	21.466	269	13.0112	149	14.7651	95	22.1053	168	41.6667	236	19.0678	256	19.5312	205	23.4146
T2C;C45G	128	9.375	147	9.52381	116	37.931	173	13.8728	134	9.70149	48	16.6667	91	56.044	115	13.913	172	12.7907	118	21.1864
T2C;C45T	149	14.094	182	22.5275	93	59.1398	154	37.013	83	24.0964	45	73.3333	97	76.2887	136	37.5	146	24.6575	84	51.1905
T2C;G46A	101	37.6238	180	41.6667	86	88.3721	141	90.0709	79	62.0253	50	96	107	84.1121	153	84.3137	169	55.6213	94	80.8511
T2C;G46C	190	27.8947	224	23.6607	184	60.8696	247	22.2672	164	20.7317	86	34.8837	154	69.4805	233	33.0472	253	30.0395	203	43.3498
T2C;G46T	142	39.4366	139	37.4101	137	47.4453	154	41.5584	99	39.3939	47	31.9149	142	52.8169	165	50.9091	161	37.2671	124	41.129
T2C;G47A	194	43.299	211	65.8768	226	74.3363	201	65.6716	139	58.9928	81	65.4321	191	79.5812	208	75.4808	238	68.0672	159	66.0377
T2C;G47C	163	60.1227	210	61.4286	208	64.9038	183	60.1093	140	62.1429	65	61.5385	164	70.122	186	60.2151	256	65.625	190	61.0526
T2C;G47T	175	55.4286	238	66.8067	225	76	243	66.6667	144	59.0278	76	71.0526	189	78.3069	255	68.2353	289	65.3979	224	71.875
T2C;G48A	126	44.4444	144	31.25	129	43.4109	163	34.3558	88	43.1818	55	36.3636	128	43.75	140	32.1429	183	44.8087	154	37.013
T2C;G48C	143	84.6154	262	89.6947	141	82.2695	210	84.7619	115	80.8696	78	92.3077	189	85.1852	191	93.7173	253	88.9328	147	74.1497
T2C;G48T	237	71.73	426	81.2207	219	73.516	280	71.4286	171	78.3626	104	81.7308	223	76.2332	339	83.4808	380	81.5789	243	69.9588
T2C;G49A	223	25.5605	242	20.6612	202	32.6733	250	27.6	155	23.2258	80	38.75	177	55.3672	215	22.7907	243	30.0412	238	28.5714
T2C;G49C	176	10.7955	202	13.3663	166	20.4819	232	7.32759	128	13.2812	83	16.8675	139	28.0576	222	11.2613	292	13.6986	202	7.42574
T2C;G49T	216	10.6481	249	15.6627	240	11.25	293	7.84983	189	14.8148	86	13.9535	160	18.125	232	9.05172	305	15.7377	210	5.71429
T2C;A50C	133	19.5489	178	29.2135	115	13.913	160	20.625	133	15.7895	61	18.0328	97	27.8351	169	20.7101	206	18.4466	179	15.0838
T2C;A50G	110	19.0909	142	21.831	78	42.3077	159	22.6415	79	18.9873	42	35.7143	96	73.9583	102	30.3922	134	32.0896	89	41.573
T2C;A50T	188	15.9574	205	15.122	170	11.7647	235	18.2979	158	17.0886	72	23.6111	140	15	234	13.2479	264	13.2576	172	14.5349
T2C;C51A	108	40.7407	170	45.2941	105	52.381	150	47.3333	98	39.7959	49	36.7347	113	73.4513	124	49.1935	161	43.4783	115	43.4783
T2C;C51G	97	42.268	134	55.9701	108	55.5556	145	50.3448	92	48.913	44	56.8182	117	63.2479	159	57.2327	155	52.9032	125	40.8
T2C;C51T	79	24.0506	115	33.0435	91	51.6484	151	27.8146	80	30	49	34.6939	87	72.4138	153	41.8301	132	37.1212	97	45.3608
[truncated: 22,008 more rows]
